# Supplementary material for: Bacterial OTU deubiquitinases regulate substrate ubiquitination upon Legionella infection
Source: eLife. 2020 Nov 13;9:e58277. doi: 10.7554/eLife.58277 (PMC7690952; doi:10.7554/eLife.58277)
Supplement: Figure 5—figure supplement 2—source data 1. [file elife-58277-fig5-figsupp2-data1.xlsx]

## Sheet: LotB Mut vs Empvec with E3 SdcA
Majority protein IDs	Protein names	Gene names	T-test Significant LotB Mut vs Empvec with E3 SdcA	-log 10 p-value LotB Mut vs Empvec with E3 SdcA	Log2 fold change LotB Mut vs Empvec with E3 SdcA
O00264	Membrane-associated progesterone receptor component 1	PGRMC1	+	1.98482	-0.456157
Q99880;Q99879;Q99877;Q93079;Q5QNW6;P62807;P58876;P57053;O60814;Q8N257;Q16778;P33778;P23527;P06899;Q96A08	Histone H2B type 1-L;Histone H2B type 1-M;Histone H2B type 1-N;Histone H2B type 1-H;Histone H2B type 2-F;Histone H2B type 1-C/E/F/G/I;Histone H2B type 1-D;Histone H2B type F-S;Histone H2B type 1-K;Histone H2B type 3-B;Histone H2B type 2-E;Histone H2B type 1-B;Histone H2B type 1-O;Histone H2B type 1-J;Histone H2B type 1-A	HIST1H2BL;HIST1H2BM;HIST1H2BN;HIST1H2BH;HIST2H2BF;HIST1H2BC;HIST1H2BD;H2BFS;HIST1H2BK;HIST3H2BB;HIST2H2BE;HIST1H2BB;HIST1H2BO;HIST1H2BJ;HIST1H2BA	+	1.42495	2.13711
P00441	Superoxide dismutase [Cu-Zn]	SOD1	+	1.56997	1.45704
P07900	Heat shock protein HSP 90-alpha	HSP90AA1	+	1.87762	1.30853
P29692	Elongation factor 1-delta	EEF1D	+	1.67498	2.27075
P46781	40S ribosomal protein S9	RPS9	+	1.8368	0.671518
P49368	T-complex protein 1 subunit gamma	CCT3	+	1.69895	0.87603
P62263	40S ribosomal protein S14	RPS14	+	1.40719	0.889491
P62280	40S ribosomal protein S11	RPS11	+	1.71426	-0.880513
P62937	Peptidyl-prolyl cis-trans isomerase A;Peptidyl-prolyl cis-trans isomerase A, N-terminally processed	PPIA	+	1.72998	0.742478
P62979;P62987;P0CG47;P0CG48	Ubiquitin-40S ribosomal protein S27a;Ubiquitin;40S ribosomal protein S27a;Ubiquitin-60S ribosomal protein L40;Ubiquitin;60S ribosomal protein L40;Polyubiquitin-B;Ubiquitin;Polyubiquitin-C;Ubiquitin	RPS27A;UBA52;UBB;UBC	+	1.41467	0.521372
P63261	Actin, cytoplasmic 2;Actin, cytoplasmic 2, N-terminally processed	ACTG1	+	1.34382	1.95768
Q6IC98	GRAM domain-containing protein 4	GRAMD4	+	1.92374	1.26285
Q96IX5	Up-regulated during skeletal muscle growth protein 5	USMG5	+	1.99134	-1.54314
A0A0C4DH31;P23083	Ig heavy chain V-I region V35	IGHV1-18		0.1457	-0.676906
A5YKK6	CCR4-NOT transcription complex subunit 1	CNOT1		0.10068	-0.156364
A6NFN3;O43251;Q9NWB1	RNA binding protein fox-1 homolog 3;RNA binding protein fox-1 homolog 2;RNA binding protein fox-1 homolog 1	RBFOX3;RBFOX2;RBFOX1		0.120157	0.264332
Q13765;E9PAV3	Nascent polypeptide-associated complex subunit alpha;Nascent polypeptide-associated complex subunit alpha, muscle-specific form	NACA		0.127947	-0.161725
O14744	Protein arginine N-methyltransferase 5;Protein arginine N-methyltransferase 5, N-terminally processed	PRMT5		0.439689	0.224713
P19105;O14950;P24844	Myosin regulatory light chain 12A;Myosin regulatory light chain 12B;Myosin regulatory light polypeptide 9	MYL12A;MYL12B;MYL9		0.676281	-0.322968
O15294	UDP-N-acetylglucosamine--peptide N-acetylglucosaminyltransferase 110 kDa subunit	OGT		0.231701	0.168791
O15397	Importin-8	IPO8		0.109636	-0.105076
O43175	D-3-phosphoglycerate dehydrogenase	PHGDH		0.471643	0.335176
O43402	ER membrane protein complex subunit 8	EMC8		0.541401	0.576598
O43795	Unconventional myosin-Ib	MYO1B		0.178136	0.295878
O60884	DnaJ homolog subfamily A member 2	DNAJA2		0.507501	-0.305632
Q8WWF6;O75190	DnaJ homolog subfamily B member 3;DnaJ homolog subfamily B member 6	DNAJB3;DNAJB6		0.0350011	0.0518977
O75339	Cartilage intermediate layer protein 1;Cartilage intermediate layer protein 1 C1;Cartilage intermediate layer protein 1 C2	CILP		0.667529	-1.84613
O75688	Protein phosphatase 1B	PPM1B		0.396407	-0.0225986
O75947	ATP synthase subunit d, mitochondrial	ATP5H		0.902276	-0.279246
O95197	Reticulon-3	RTN3		0.386922	0.818499
O95292	Vesicle-associated membrane protein-associated protein B/C	VAPB		0.80102	-1.06473
O95816	BAG family molecular chaperone regulator 2	BAG2		0.137807	-0.143792
P00167	Cytochrome b5	CYB5A		0.000878392	0.00090917
P01859	Ig gamma-2 chain C region	IGHG2		0.220151	-0.295723
P02786	Transferrin receptor protein 1;Transferrin receptor protein 1, serum form	TFRC		0.135732	-0.308091
P04075	Fructose-bisphosphate aldolase A	ALDOA		0.91067	0.683523
P04406	Glyceraldehyde-3-phosphate dehydrogenase	GAPDH		0.417089	0.240912
P04843	Dolichyl-diphosphooligosaccharide--protein glycosyltransferase subunit 1	RPN1		0.295591	0.125188
P04844	Dolichyl-diphosphooligosaccharide--protein glycosyltransferase subunit 2	RPN2		0.229635	0.537254
Q99878;Q96KK5;Q9BTM1;Q93077;Q7L7L0;P20671;P0C0S8;P04908;Q16777;Q6FI13;P16104;Q71UI9;P0C0S5;Q8IUE6;Q96QV6	Histone H2A type 1-J;Histone H2A type 1-H;Histone H2A.J;Histone H2A type 1-C;Histone H2A type 3;Histone H2A type 1-D;Histone H2A type 1;Histone H2A type 1-B/E;Histone H2A type 2-C;Histone H2A type 2-A;Histone H2AX;Histone H2A.V;Histone H2A.Z;Histone H2A type 2-B;Histone H2A type 1-A	HIST1H2AJ;HIST1H2AH;H2AFJ;HIST1H2AC;HIST3H2A;HIST1H2AD;HIST1H2AG;HIST1H2AB;HIST2H2AC;HIST2H2AA3;H2AFX;H2AFV;H2AFZ;HIST2H2AB;HIST1H2AA		1.27493	1.58717
P05023	Sodium/potassium-transporting ATPase subunit alpha-1	ATP1A1		0.095245	0.120463
P05141	ADP/ATP translocase 2;ADP/ATP translocase 2, N-terminally processed	SLC25A5		0.958186	-0.264887
P05386	60S acidic ribosomal protein P1	RPLP1		0.525531	0.137479
P05387	60S acidic ribosomal protein P2	RPLP2		0.277373	-0.196718
P05388;Q8NHW5	60S acidic ribosomal protein P0;60S acidic ribosomal protein P0-like	RPLP0;RPLP0P6		0.405193	0.668283
P06454	Prothymosin alpha;Prothymosin alpha, N-terminally processed;Thymosin alpha-1	PTMA		0.877639	1.03971
P06576	ATP synthase subunit beta, mitochondrial	ATP5B		0.111259	-0.0596816
P06733	Alpha-enolase	ENO1		0.82529	1.14958
P06748	Nucleophosmin	NPM1		0.0825838	0.0672884
P07195	L-lactate dehydrogenase B chain	LDHB		0.481419	0.633474
P07437;Q9BVA1;Q13885	Tubulin beta chain;Tubulin beta-2B chain;Tubulin beta-2A chain	TUBB;TUBB2B;TUBB2A		0.207982	0.0960315
P07737	Profilin-1	PFN1		0.627439	1.48918
P07910;B2RXH8	Heterogeneous nuclear ribonucleoproteins C1/C2;Heterogeneous nuclear ribonucleoprotein C-like 2	HNRNPC;HNRNPCL2		0.272427	-0.181627
P07919;A0A096LP55	Cytochrome b-c1 complex subunit 6, mitochondrial;Cytochrome b-c1 complex subunit 6	UQCRH;UQCRHL		0.964435	-0.591204
P08238	Heat shock protein HSP 90-beta	HSP90AB1		0.840923	1.20027
P08621	U1 small nuclear ribonucleoprotein 70 kDa	SNRNP70		0.386657	0.472089
P08708	40S ribosomal protein S17	RPS17		0.820214	-0.549865
P0DMV9;P0DMV8	Heat shock 70 kDa protein 1B;Heat shock 70 kDa protein 1A	HSPA1B;HSPA1A		0.839949	-0.276243
P16403;P10412;P16402;P22492;Q02539	Histone H1.2;Histone H1.4;Histone H1.3;Histone H1t;Histone H1.1	HIST1H1C;HIST1H1E;HIST1H1D;HIST1H1T;HIST1H1A		0.401356	0.493295
P10599	Thioredoxin	TXN		0.0309252	-0.0233936
P10809	60 kDa heat shock protein, mitochondrial	HSPD1		0.0603236	-0.0429656
P11021	78 kDa glucose-regulated protein	HSPA5		0.174215	0.357128
P11142	Heat shock cognate 71 kDa protein	HSPA8		0.343322	-0.0992997
P11940;Q9H361	Polyadenylate-binding protein 1;Polyadenylate-binding protein 3	PABPC1;PABPC3		0.209004	-0.120778
P12004	Proliferating cell nuclear antigen	PCNA		0.0292084	-0.015631
P12236;P12235	ADP/ATP translocase 3;ADP/ATP translocase 3, N-terminally processed;ADP/ATP translocase 1	SLC25A6;SLC25A4		0.0753107	-0.106577
P13639	Elongation factor 2	EEF2		0.507003	0.852912
P14927	Cytochrome b-c1 complex subunit 7	UQCRB		0.386741	-0.806409
P15735	Phosphorylase b kinase gamma catalytic chain, liver/testis isoform	PHKG2		0.124062	0.088775
P15880	40S ribosomal protein S2	RPS2		0.297705	0.535323
P17066;P48741	Heat shock 70 kDa protein 6;Putative heat shock 70 kDa protein 7	HSPA6;HSPA7		1.27596	-0.367525
P17987	T-complex protein 1 subunit alpha	TCP1		0.438209	0.749091
P18621	60S ribosomal protein L17	RPL17		0.432616	0.125506
P18859	ATP synthase-coupling factor 6, mitochondrial	ATP5J		0.129221	0.0772874
P19338	Nucleolin	NCL		0.0336989	-0.0938791
P19474	E3 ubiquitin-protein ligase TRIM21	TRIM21		0.293261	0.235164
Q9NRW1;P20340;Q14964	Ras-related protein Rab-6B;Ras-related protein Rab-6A;Ras-related protein Rab-39A	RAB6B;RAB6A;RAB39A		0.121114	0.109807
P20674	Cytochrome c oxidase subunit 5A, mitochondrial	COX5A		0.0212816	0.0384556
P21333	Filamin-A	FLNA		0.331027	-0.345769
P21796	Voltage-dependent anion-selective channel protein 1	VDAC1		0.580396	-0.380435
P22392;P15531;O60361	Nucleoside diphosphate kinase B;Nucleoside diphosphate kinase A;Putative nucleoside diphosphate kinase	NME2;NME1;NME2P1		0.117059	-0.199628
P22626	Heterogeneous nuclear ribonucleoproteins A2/B1	HNRNPA2B1		0.84572	1.20703
P23458	Tyrosine-protein kinase JAK1	JAK1		0.0613267	0.0379744
P23528	Cofilin-1	CFL1		0.380723	1.1397
P23588	Eukaryotic translation initiation factor 4B	EIF4B		0.717328	0.303242
P24534	Elongation factor 1-beta	EEF1B2		0.350769	0.708371
P24539	ATP synthase F(0) complex subunit B1, mitochondrial	ATP5F1		0.501579	-0.472931
P25398	40S ribosomal protein S12	RPS12		0.297412	0.262999
P25705	ATP synthase subunit alpha, mitochondrial	ATP5A1		0.423769	0.212161
P25789	Proteasome subunit alpha type-4	PSMA4		0.299944	-0.506113
P26373	60S ribosomal protein L13	RPL13		0.58114	-0.211914
P27824	Calnexin	CANX		0.304113	0.428483
P30041	Peroxiredoxin-6	PRDX6		0.35574	0.430243
P30049	ATP synthase subunit delta, mitochondrial	ATP5D		0.00284244	0.00225321
P31040	Succinate dehydrogenase [ubiquinone] flavoprotein subunit, mitochondrial	SDHA		0.773022	-0.588524
P31689	DnaJ homolog subfamily A member 1	DNAJA1		0.40209	0.68723
P31930	Cytochrome b-c1 complex subunit 1, mitochondrial	UQCRC1		0.0614855	0.0814041
P31943	Heterogeneous nuclear ribonucleoprotein H;Heterogeneous nuclear ribonucleoprotein H, N-terminally processed	HNRNPH1		0.312637	0.426747
P32119	Peroxiredoxin-2	PRDX2		0.0084311	0.0286496
P35030	Trypsin-3	PRSS3		0.200945	-0.256698
P35232	Prohibitin	PHB		0.17702	-0.116381
P35579	Myosin-9	MYH9		1.27251	-0.506494
P35580	Myosin-10	MYH10		0.597618	-0.358145
P35613	Basigin	BSG		0.635045	0.39862
P38646	Stress-70 protein, mitochondrial	HSPA9		0.49045	-0.196352
P42677;Q71UM5	40S ribosomal protein S27;40S ribosomal protein S27-like	RPS27;RPS27L		0.567399	0.188412
P43487	Ran-specific GTPase-activating protein	RANBP1		0.273258	0.384442
P43686	26S protease regulatory subunit 6B	PSMC4		0.598559	-0.526314
P46019	Phosphorylase b kinase regulatory subunit alpha, liver isoform	PHKA2		0.252665	0.20494
P46020	Phosphorylase b kinase regulatory subunit alpha, skeletal muscle isoform	PHKA1		0.139313	0.0810483
P46776	60S ribosomal protein L27a	RPL27A		0.789123	-0.735379
P46782	40S ribosomal protein S5;40S ribosomal protein S5, N-terminally processed	RPS5		0.482929	0.265369
P46977	Dolichyl-diphosphooligosaccharide--protein glycosyltransferase subunit STT3A	STT3A		0.24273	-0.222232
P48643	T-complex protein 1 subunit epsilon	CCT5		0.0507707	-0.0593843
P49411	Elongation factor Tu, mitochondrial	TUFM		0.274853	-0.361031
P49755	Transmembrane emp24 domain-containing protein 10	TMED10		0.443714	0.132778
P50990	T-complex protein 1 subunit theta	CCT8		0.753921	0.639564
P51149	Ras-related protein Rab-7a	RAB7A		0.403451	-0.584473
P51572	B-cell receptor-associated protein 31	BCAP31		0.189755	0.123059
P52597	Heterogeneous nuclear ribonucleoprotein F;Heterogeneous nuclear ribonucleoprotein F, N-terminally processed	HNRNPF		0.687202	-0.618259
P52815	39S ribosomal protein L12, mitochondrial	MRPL12		0.487539	0.41731
P53618	Coatomer subunit beta	COPB1		0.198118	0.10617
P53985	Monocarboxylate transporter 1	SLC16A1		0.0358754	-0.0534554
P54105	Methylosome subunit pICln	CLNS1A		0.160491	0.105599
P55060	Exportin-2	CSE1L		0.0477922	-0.0394424
P55072	Transitional endoplasmic reticulum ATPase	VCP		0.391902	0.688203
P56385	ATP synthase subunit e, mitochondrial	ATP5I		0.0324085	0.0198851
P60174	Triosephosphate isomerase	TPI1		1.22546	2.05918
P60468	Protein transport protein Sec61 subunit beta	SEC61B		0.127268	0.110229
P60660	Myosin light polypeptide 6	MYL6		0.474744	-0.290971
P60709	Actin, cytoplasmic 1;Actin, cytoplasmic 1, N-terminally processed	ACTB		0.478966	0.187541
P61254;Q9UNX3	60S ribosomal protein L26;60S ribosomal protein L26-like 1	RPL26;RPL26L1		0.132564	-0.197787
P61353	60S ribosomal protein L27	RPL27		0.386762	-0.311797
P61604	10 kDa heat shock protein, mitochondrial	HSPE1		1.09614	1.69542
P61978	Heterogeneous nuclear ribonucleoprotein K	HNRNPK		0.165203	0.0988051
P62195	26S protease regulatory subunit 8	PSMC5		0.397998	-0.80657
P62241	40S ribosomal protein S8	RPS8		0.0114202	-0.0134799
P62249	40S ribosomal protein S16	RPS16		0.256056	-0.134685
P62258	14-3-3 protein epsilon	YWHAE		0.768264	0.843714
P62266	40S ribosomal protein S23	RPS23		0.530164	0.401009
P62269	40S ribosomal protein S18	RPS18		0.368529	0.223734
P62277	40S ribosomal protein S13	RPS13		0.149663	0.226279
P62314	Small nuclear ribonucleoprotein Sm D1	SNRPD1		0.193803	0.380114
P62318	Small nuclear ribonucleoprotein Sm D3	SNRPD3		0.0351897	-0.0348409
P62491;Q15907	Ras-related protein Rab-11A;Ras-related protein Rab-11B	RAB11A;RAB11B		0.16494	0.259812
P63267;P68133;P68032;P62736	Actin, gamma-enteric smooth muscle;Actin, alpha skeletal muscle;Actin, alpha cardiac muscle 1;Actin, aortic smooth muscle	ACTG2;ACTA1;ACTC1;ACTA2		0.101192	-0.126467
P62750	60S ribosomal protein L23a	RPL23A		0.553181	0.284216
P62753	40S ribosomal protein S6	RPS6		0.173016	0.115083
P62805	Histone H4	HIST1H4A		1.05137	1.44015
P62829	60S ribosomal protein L23	RPL23		0.834557	-0.410904
P62854;Q5JNZ5	40S ribosomal protein S26;Putative 40S ribosomal protein S26-like 1	RPS26;RPS26P11		0.257149	-0.170755
P62873;Q9HAV0;P62879	Guanine nucleotide-binding protein G(I)/G(S)/G(T) subunit beta-1;Guanine nucleotide-binding protein subunit beta-4;Guanine nucleotide-binding protein G(I)/G(S)/G(T) subunit beta-2	GNB1;GNB4;GNB2		0.16463	0.493044
P62899	60S ribosomal protein L31	RPL31		0.495475	0.482377
P62917	60S ribosomal protein L8	RPL8		0.63354	-0.90546
P67809	Nuclease-sensitive element-binding protein 1	YBX1		0.0262556	-0.0454798
P68104;Q5VTE0;Q05639	Elongation factor 1-alpha 1;Putative elongation factor 1-alpha-like 3;Elongation factor 1-alpha 2	EEF1A1;EEF1A1P5;EEF1A2		0.373716	0.212774
P68363;P68366	Tubulin alpha-1B chain;Tubulin alpha-4A chain	TUBA1B;TUBA4A		0.0397838	-0.027221
P68371;P04350	Tubulin beta-4B chain;Tubulin beta-4A chain	TUBB4B;TUBB4A		0.450074	0.186567
Q6NXT2;Q71DI3;Q16695;P84243;P68431	Histone H3.3C;Histone H3.2;Histone H3.1t;Histone H3.3;Histone H3.1	H3F3C;HIST2H3A;HIST3H3;H3F3A;HIST1H3A		1.05505	1.25857
P78371	T-complex protein 1 subunit beta	CCT2		0.250026	0.473881
P81605	Dermcidin;Survival-promoting peptide;DCD-1	DCD		0.0735471	0.150365
P83731	60S ribosomal protein L24	RPL24		1.18106	0.620751
P83881;Q969Q0	60S ribosomal protein L36a;60S ribosomal protein L36a-like	RPL36A;RPL36AL		0.388638	0.760535
P84090	Enhancer of rudimentary homolog	ERH		0.421978	0.240643
P84098	60S ribosomal protein L19	RPL19		0.584979	-0.210251
P98175	RNA-binding protein 10	RBM10		0.583562	-0.215917
Q00325	Phosphate carrier protein, mitochondrial	SLC25A3		0.140708	-0.0745824
Q01804	OTU domain-containing protein 4	OTUD4		0.278328	-0.165443
Q02878	60S ribosomal protein L6	RPL6		1.02026	-0.490893
Q04760	Lactoylglutathione lyase	GLO1		0.313627	0.331052
Q06278	Aldehyde oxidase	AOX1		1.17648	-3.03859
Q06830	Peroxiredoxin-1	PRDX1		0.0769491	-0.0600077
Q08378	Golgin subfamily A member 3	GOLGA3		0.65141	0.12008
Q13347	Eukaryotic translation initiation factor 3 subunit I	EIF3I		0.355396	0.547559
Q13435	Splicing factor 3B subunit 2	SF3B2		0.305688	0.340931
Q13813	Spectrin alpha chain, non-erythrocytic 1	SPTAN1		0.141154	0.461683
Q14257	Reticulocalbin-2	RCN2		0.0430079	-0.0449947
Q14574	Desmocollin-3	DSC3		0.223195	0.107478
Q14974	Importin subunit beta-1	KPNB1		0.112291	-0.159017
Q15185	Prostaglandin E synthase 3	PTGES3		0.301274	0.595838
Q15208	Serine/threonine-protein kinase 38	STK38		0.725674	0.278732
Q15233	Non-POU domain-containing octamer-binding protein	NONO		0.144031	0.0655241
Q15293	Reticulocalbin-1	RCN1		0.0411094	-0.083827
Q15365;Q15366;P57721	Poly(rC)-binding protein 1;Poly(rC)-binding protein 2;Poly(rC)-binding protein 3	PCBP1;PCBP2;PCBP3		0.214444	-0.517623
Q15738	Sterol-4-alpha-carboxylate 3-dehydrogenase, decarboxylating	NSDHL		0.246793	0.847388
Q15750	TGF-beta-activated kinase 1 and MAP3K7-binding protein 1	TAB1		0.576393	-0.627938
Q15758	Neutral amino acid transporter B(0)	SLC1A5		0.15969	0.15432
Q16514	Transcription initiation factor TFIID subunit 12	TAF12		0.221299	-0.157761
Q16531	DNA damage-binding protein 1	DDB1		0.107848	0.2768
Q5UIP0	Telomere-associated protein RIF1	RIF1		0.69444	1.06584
Q5W0B1	RING finger protein 219	RNF219		0.286959	-0.0908375
Q6N021	Methylcytosine dioxygenase TET2	TET2		1.05886	0.532868
Q7Z353	Highly divergent homeobox	HDX		0.43947	0.229249
Q7Z406	Myosin-14	MYH14		1.28354	-0.436746
Q8N1I0	Dedicator of cytokinesis protein 4	DOCK4		1.118	-0.535519
Q8NC51	Plasminogen activator inhibitor 1 RNA-binding protein	SERBP1		0.0419417	0.0931435
Q8NFU7	Methylcytosine dioxygenase TET1	TET1		0.269524	0.159957
Q8WXF1	Paraspeckle component 1	PSPC1		0.0379477	0.0214383
Q92600	Cell differentiation protein RCD1 homolog	RQCD1		0.0856612	-0.159594
Q92945	Far upstream element-binding protein 2	KHSRP		0.0461029	-0.0992031
Q93045	Stathmin-2	STMN2		0.409317	0.644692
Q93100	Phosphorylase b kinase regulatory subunit beta	PHKB		0.301535	0.146706
Q96AG4	Leucine-rich repeat-containing protein 59	LRRC59		0.691543	0.249345
Q96DX5	Ankyrin repeat and SOCS box protein 9	ASB9		0.0424167	-0.0456359
Q96JJ3	Engulfment and cell motility protein 2	ELMO2		0.814685	-0.897529
Q99417	C-Myc-binding protein	MYCBP		0.00907009	0.00532532
Q99623	Prohibitin-2	PHB2		0.145967	-0.125284
Q9BQA1	Methylosome protein 50	WDR77		0.0431576	0.0278581
Q9BRS2	Serine/threonine-protein kinase RIO1	RIOK1		0.00210698	0.00200939
Q9BUA3	Uncharacterized protein C11orf84	C11orf84		0.506109	-0.206299
Q9BVC6	Transmembrane protein 109	TMEM109		0.269696	0.242084
Q9BWJ5	Splicing factor 3B subunit 5	SF3B5		0.183779	-0.403579
Q9H267	Vacuolar protein sorting-associated protein 33B	VPS33B		0.194872	0.263573
Q9H307	Pinin	PNN		0.0641052	-0.102457
Q9H3K6	BolA-like protein 2	BOLA2		0.0319322	-0.0191053
Q9H9B4	Sideroflexin-1	SFXN1		0.277856	0.609744
Q9NYF8	Bcl-2-associated transcription factor 1	BCLAF1		0.174016	0.102146
Q9NYL9;Q9NZR1	Tropomodulin-3;Tropomodulin-2	TMOD3;TMOD2		0.487274	0.265189
Q9NZT1	Calmodulin-like protein 5	CALML5		0.688753	0.966871
Q9UH99	SUN domain-containing protein 2	SUN2		0.216044	-0.159607
Q9Y230	RuvB-like 2	RUVBL2		0.0496601	0.0448427
Q9Y265	RuvB-like 1	RUVBL1		0.781318	-1.09429
Q9Y2H1	Serine/threonine-protein kinase 38-like	STK38L		0.504249	0.227326
Q9Y2W1	Thyroid hormone receptor-associated protein 3	THRAP3		0.912178	0.430889
Q9Y657	Spindlin-1	SPIN1		0.370276	-0.120924
Q9Y6Y0	Influenza virus NS1A-binding protein	IVNS1ABP		0.443999	0.57628

## Sheet: LotB Mut vs Empvec with E3 SidC
Protein IDs	Majority protein IDs	Protein names	Gene names	T-test Significant LotB Mut vs Empvec with E3 SidC	-log 10 p-value LotB Mut vs Empvec with E3 SidC	Log2 fold change LotB Mut vs Empvec with E3 SidC
P54105	P54105	Methylosome subunit pICln	CLNS1A	+	1.38558	-0.375356
P62195;Q8NB90	P62195	26S protease regulatory subunit 8	PSMC5	+	1.64965	1.006
P62266	P62266	40S ribosomal protein S23	RPS23	+	1.90144	0.554076
P68104;Q5VTE0;Q05639	P68104;Q5VTE0;Q05639	Elongation factor 1-alpha 1;Putative elongation factor 1-alpha-like 3;Elongation factor 1-alpha 2	EEF1A1;EEF1A1P5;EEF1A2	+	1.74552	0.358143
Q99460	Q99460	26S proteasome non-ATPase regulatory subunit 1	PSMD1	+	1.38844	1.31668
Q9H267	Q9H267	Vacuolar protein sorting-associated protein 33B	VPS33B	+	1.36681	1.34072
Q9Y265	Q9Y265	RuvB-like 1	RUVBL1	+	1.42308	0.424604
A2AJT9	A2AJT9	Uncharacterized protein CXorf23	CXorf23		0.718717	2.14061
A5YKK6	A5YKK6	CCR4-NOT transcription complex subunit 1	CNOT1		0.376095	0.435759
Q13765;E9PAV3	Q13765;E9PAV3	Nascent polypeptide-associated complex subunit alpha;Nascent polypeptide-associated complex subunit alpha, muscle-specific form	NACA		0.225149	0.333456
O00264;O15173	O00264	Membrane-associated progesterone receptor component 1	PGRMC1		0.127169	-0.195009
O14744	O14744	Protein arginine N-methyltransferase 5;Protein arginine N-methyltransferase 5, N-terminally processed	PRMT5		0.519608	-0.252301
O14828	O14828	Secretory carrier-associated membrane protein 3	SCAMP3		0.164546	0.244823
P19105;O14950;P24844	P19105;O14950;P24844	Myosin regulatory light chain 12A;Myosin regulatory light chain 12B;Myosin regulatory light polypeptide 9	MYL12A;MYL12B;MYL9		0.00703348	0.00879796
O14980	O14980	Exportin-1	XPO1		0.474041	0.845892
O15294	O15294	UDP-N-acetylglucosamine--peptide N-acetylglucosaminyltransferase 110 kDa subunit	OGT		0.028185	-0.0200971
O15397	O15397	Importin-8	IPO8		0.600179	0.46331
O43175	O43175	D-3-phosphoglycerate dehydrogenase	PHGDH		0.413932	0.300151
O43242	O43242	26S proteasome non-ATPase regulatory subunit 3	PSMD3		0.056569	0.113475
O43402	O43402	ER membrane protein complex subunit 8	EMC8		0.530802	-0.194063
O43795;Q9UBC5	O43795	Unconventional myosin-Ib	MYO1B		0.0204551	0.0215149
Q99880;Q99879;Q99877;Q93079;Q5QNW6;P62807;P58876;P57053;O60814;Q8N257;Q16778;P33778;P23527;P06899;Q96A08	Q99880;Q99879;Q99877;Q93079;Q5QNW6;P62807;P58876;P57053;O60814;Q8N257;Q16778;P33778;P23527;P06899;Q96A08	Histone H2B type 1-L;Histone H2B type 1-M;Histone H2B type 1-N;Histone H2B type 1-H;Histone H2B type 2-F;Histone H2B type 1-C/E/F/G/I;Histone H2B type 1-D;Histone H2B type F-S;Histone H2B type 1-K;Histone H2B type 3-B;Histone H2B type 2-E;Histone H2B type 1-B;Histone H2B type 1-O;Histone H2B type 1-J;Histone H2B type 1-A	HIST1H2BL;HIST1H2BM;HIST1H2BN;HIST1H2BH;HIST2H2BF;HIST1H2BC;HIST1H2BD;H2BFS;HIST1H2BK;HIST3H2BB;HIST2H2BE;HIST1H2BB;HIST1H2BO;HIST1H2BJ;HIST1H2BA		0.936829	-0.821507
O60884	O60884	DnaJ homolog subfamily A member 2	DNAJA2		0.493569	-0.578684
O75339	O75339	Cartilage intermediate layer protein 1;Cartilage intermediate layer protein 1 C1;Cartilage intermediate layer protein 1 C2	CILP		0.799758	-0.81554
O75643	O75643	U5 small nuclear ribonucleoprotein 200 kDa helicase	SNRNP200		0.0574454	0.152312
O75688;P35813	O75688	Protein phosphatase 1B	PPM1B		0.543424	-0.199876
O75947	O75947	ATP synthase subunit d, mitochondrial	ATP5H		0.0295924	-0.0321267
O95816	O95816	BAG family molecular chaperone regulator 2	BAG2		0.158033	0.409801
O95983	O95983	Methyl-CpG-binding domain protein 3	MBD3		1.0497	-0.532047
P00167	P00167	Cytochrome b5	CYB5A		0.0152849	-0.0138674
P00387	P00387	NADH-cytochrome b5 reductase 3;NADH-cytochrome b5 reductase 3 membrane-bound form;NADH-cytochrome b5 reductase 3 soluble form	CYB5R3		0.840005	0.576602
P01859	P01859	Ig gamma-2 chain C region	IGHG2		0.860489	1.52504
P02786	P02786	Transferrin receptor protein 1;Transferrin receptor protein 1, serum form	TFRC		0.166767	0.612841
P04406	P04406	Glyceraldehyde-3-phosphate dehydrogenase	GAPDH		0.52211	0.375868
P04843	P04843	Dolichyl-diphosphooligosaccharide--protein glycosyltransferase subunit 1	RPN1		0.718224	0.496675
P04844	P04844	Dolichyl-diphosphooligosaccharide--protein glycosyltransferase subunit 2	RPN2		0.421054	0.488194
Q99878;Q96KK5;Q9BTM1;Q93077;Q7L7L0;P20671;P0C0S8;P04908;Q16777;Q6FI13;P16104;Q71UI9;P0C0S5;Q8IUE6;Q96QV6	Q99878;Q96KK5;Q9BTM1;Q93077;Q7L7L0;P20671;P0C0S8;P04908;Q16777;Q6FI13;P16104;Q71UI9;P0C0S5;Q8IUE6;Q96QV6	Histone H2A type 1-J;Histone H2A type 1-H;Histone H2A.J;Histone H2A type 1-C;Histone H2A type 3;Histone H2A type 1-D;Histone H2A type 1;Histone H2A type 1-B/E;Histone H2A type 2-C;Histone H2A type 2-A;Histone H2AX;Histone H2A.V;Histone H2A.Z;Histone H2A type 2-B;Histone H2A type 1-A	HIST1H2AJ;HIST1H2AH;H2AFJ;HIST1H2AC;HIST3H2A;HIST1H2AD;HIST1H2AG;HIST1H2AB;HIST2H2AC;HIST2H2AA3;H2AFX;H2AFV;H2AFZ;HIST2H2AB;HIST1H2AA		0.901167	-0.549485
P05023;P13637;P50993;Q13733;P20648	P05023	Sodium/potassium-transporting ATPase subunit alpha-1	ATP1A1		0.271233	-0.257262
P05141;Q9H0C2	P05141	ADP/ATP translocase 2;ADP/ATP translocase 2, N-terminally processed	SLC25A5		0.337427	0.23022
P05387	P05387	60S acidic ribosomal protein P2	RPLP2		0.13118	-0.10776
P05388;Q8NHW5	P05388;Q8NHW5	60S acidic ribosomal protein P0;60S acidic ribosomal protein P0-like	RPLP0;RPLP0P6		0.518135	0.660748
P06576	P06576	ATP synthase subunit beta, mitochondrial	ATP5B		0.180966	0.119645
P06733;P13929;P09104	P06733	Alpha-enolase	ENO1		0.139306	0.368498
P06748	P06748	Nucleophosmin	NPM1		0.111549	-0.159281
P07437;Q9BVA1;Q13885;A6NNZ2;CON__ENSEMBL:ENSBTAP00000025008;Q9H4B7	P07437;Q9BVA1;Q13885	Tubulin beta chain;Tubulin beta-2B chain;Tubulin beta-2A chain	TUBB;TUBB2B;TUBB2A		0.384766	0.194082
P07910;B2RXH8;Q86SE5	P07910;B2RXH8	Heterogeneous nuclear ribonucleoproteins C1/C2;Heterogeneous nuclear ribonucleoprotein C-like 2	HNRNPC;HNRNPCL2		0.538827	-0.454405
P08195	P08195	4F2 cell-surface antigen heavy chain	SLC3A2		1.14839	1.94053
P08238;Q58FF8;Q58FF7	P08238	Heat shock protein HSP 90-beta	HSP90AB1		0.871127	1.11714
P0DMV9;P0DMV8	P0DMV9;P0DMV8	Heat shock 70 kDa protein 1B;Heat shock 70 kDa protein 1A	HSPA1B;HSPA1A		0.0606011	0.0581582
P16403;P10412;P16402;P22492;Q02539;P16401	P16403;P10412;P16402;P22492;Q02539	Histone H1.2;Histone H1.4;Histone H1.3;Histone H1t;Histone H1.1	HIST1H1C;HIST1H1E;HIST1H1D;HIST1H1T;HIST1H1A		0.722966	0.339634
P10599	P10599	Thioredoxin	TXN		0.107248	0.135139
P10644	P10644	cAMP-dependent protein kinase type I-alpha regulatory subunit;cAMP-dependent protein kinase type I-alpha regulatory subunit, N-terminally processed	PRKAR1A		0.115166	-0.36087
P10809	P10809	60 kDa heat shock protein, mitochondrial	HSPD1		0.286916	-0.176702
P11021	P11021	78 kDa glucose-regulated protein	HSPA5		0.132741	0.119312
P11142;P54652	P11142	Heat shock cognate 71 kDa protein	HSPA8		0.0328267	0.0254396
P11940;Q9H361;Q4VXU2;Q96DU9;P0CB38	P11940;Q9H361	Polyadenylate-binding protein 1;Polyadenylate-binding protein 3	PABPC1;PABPC3		0.134824	-0.124017
P12004	P12004	Proliferating cell nuclear antigen	PCNA		0.106303	-0.0913788
P13473	P13473	Lysosome-associated membrane glycoprotein 2	LAMP2		0.129223	0.0886898
P15735	P15735	Phosphorylase b kinase gamma catalytic chain, liver/testis isoform	PHKG2		0.279523	0.20738
P17066;P48741	P17066;P48741	Heat shock 70 kDa protein 6;Putative heat shock 70 kDa protein 7	HSPA6;HSPA7		0.0908356	-0.0947173
P17980	P17980	26S protease regulatory subunit 6A	PSMC3		0.0815012	0.181001
P17987	P17987	T-complex protein 1 subunit alpha	TCP1		0.162481	0.229227
P18621	P18621	60S ribosomal protein L17	RPL17		0.0683768	-0.0874421
P18859	P18859	ATP synthase-coupling factor 6, mitochondrial	ATP5J		0.000993732	-0.00112279
P19338	P19338	Nucleolin	NCL		0.638312	0.710271
P19474	P19474	E3 ubiquitin-protein ligase TRIM21	TRIM21		0.172975	0.137629
Q9NRW1;P20340;Q14964	Q9NRW1;P20340;Q14964	Ras-related protein Rab-6B;Ras-related protein Rab-6A;Ras-related protein Rab-39A	RAB6B;RAB6A;RAB39A		0.182383	0.21448
P20645	P20645	Cation-dependent mannose-6-phosphate receptor	M6PR		0.455492	0.976146
P20674	P20674	Cytochrome c oxidase subunit 5A, mitochondrial	COX5A		0.113296	0.159242
P21333;O75369;Q14315	P21333	Filamin-A	FLNA		0.152779	0.207119
P21796	P21796	Voltage-dependent anion-selective channel protein 1	VDAC1		0.315376	-0.206981
P22392;P15531;O60361	P22392;P15531;O60361	Nucleoside diphosphate kinase B;Nucleoside diphosphate kinase A;Putative nucleoside diphosphate kinase	NME2;NME1;NME2P1		0.229485	0.336534
P22695	P22695	Cytochrome b-c1 complex subunit 2, mitochondrial	UQCRC2		0.553687	-0.534014
P23458;P29597;O60674	P23458	Tyrosine-protein kinase JAK1	JAK1		0.403163	0.397883
P23528;Q9Y281	P23528	Cofilin-1	CFL1		0.458272	-0.534189
P23588;REV__P23588	P23588	Eukaryotic translation initiation factor 4B	EIF4B		0.989002	0.354996
P24539	P24539	ATP synthase F(0) complex subunit B1, mitochondrial	ATP5F1		0.268849	0.0979656
P25398	P25398	40S ribosomal protein S12	RPS12		0.304704	-0.552284
P25705	P25705	ATP synthase subunit alpha, mitochondrial	ATP5A1		0.060043	-0.0572033
P25789	P25789	Proteasome subunit alpha type-4	PSMA4		0.16519	0.170979
P26373	P26373	60S ribosomal protein L13	RPL13		0.764852	0.434761
P27635;Q96L21	P27635	60S ribosomal protein L10	RPL10		0.333992	0.441091
P27824	P27824	Calnexin	CANX		0.360962	0.349021
P29692	P29692	Elongation factor 1-delta	EEF1D		0.0296658	-0.0691525
P30041	P30041	Peroxiredoxin-6	PRDX6		0.187619	-0.187957
P30049	P30049	ATP synthase subunit delta, mitochondrial	ATP5D		0.174742	-0.221683
P30050	P30050	60S ribosomal protein L12	RPL12		0.300421	-0.408524
P31040	P31040	Succinate dehydrogenase [ubiquinone] flavoprotein subunit, mitochondrial	SDHA		0.045638	0.0992308
P31689	P31689	DnaJ homolog subfamily A member 1	DNAJA1		0.319124	-0.2762
P31930	P31930	Cytochrome b-c1 complex subunit 1, mitochondrial	UQCRC1		0.503811	0.254875
P31943;P31942	P31943	Heterogeneous nuclear ribonucleoprotein H;Heterogeneous nuclear ribonucleoprotein H, N-terminally processed	HNRNPH1		0.443478	0.693851
P32119	P32119	Peroxiredoxin-2	PRDX2		0.0262028	-0.026406
P35030	P35030	Trypsin-3	PRSS3		0.139665	-0.324931
P35232	P35232	Prohibitin	PHB		0.205862	-0.165594
P35579;REV__Q9UKV3;P12883;P13535;Q9UKX3;Q9Y623;P13533;P12882;P11055;Q9UKX2;A7E2Y1	P35579	Myosin-9	MYH9		0.292687	0.245276
P35580	P35580	Myosin-10	MYH10		0.306167	0.303839
P35613	P35613	Basigin	BSG		0.0755832	0.0485007
P36542	P36542	ATP synthase subunit gamma, mitochondrial	ATP5C1		0.251282	-0.140966
P36578	P36578	60S ribosomal protein L4	RPL4		0.405035	-0.576406
P38646	P38646	Stress-70 protein, mitochondrial	HSPA9		0.249788	0.206152
P39656	P39656	Dolichyl-diphosphooligosaccharide--protein glycosyltransferase 48 kDa subunit	DDOST		0.518221	0.64046
P40227;Q92526	P40227	T-complex protein 1 subunit zeta	CCT6A		0.0385086	-0.064846
P40939	P40939	Trifunctional enzyme subunit alpha, mitochondrial;Long-chain enoyl-CoA hydratase;Long chain 3-hydroxyacyl-CoA dehydrogenase	HADHA		0.669224	0.854967
P42766	P42766	60S ribosomal protein L35	RPL35		0.0676825	-0.0935637
P45880	P45880	Voltage-dependent anion-selective channel protein 2	VDAC2		0.355931	0.468931
P46019	P46019	Phosphorylase b kinase regulatory subunit alpha, liver isoform	PHKA2		0.457773	0.2726
P46020	P46020	Phosphorylase b kinase regulatory subunit alpha, skeletal muscle isoform	PHKA1		0.0999743	0.102586
P46776	P46776	60S ribosomal protein L27a	RPL27A		0.214016	0.269383
P46782	P46782	40S ribosomal protein S5;40S ribosomal protein S5, N-terminally processed	RPS5		0.539061	0.388841
P48047	P48047	ATP synthase subunit O, mitochondrial	ATP5O		0.420427	-0.282869
P48643	P48643	T-complex protein 1 subunit epsilon	CCT5		0.341106	0.479623
P49411	P49411	Elongation factor Tu, mitochondrial	TUFM		0.0635908	-0.0529311
P50990	P50990	T-complex protein 1 subunit theta	CCT8		0.250663	-0.209954
P51149	P51149	Ras-related protein Rab-7a	RAB7A		1.08565	0.921677
P51572	P51572	B-cell receptor-associated protein 31	BCAP31		1.06556	0.661366
P52272	P52272	Heterogeneous nuclear ribonucleoprotein M	HNRNPM		0.33759	-0.3308
P53597	P53597	Succinyl-CoA ligase [ADP/GDP-forming] subunit alpha, mitochondrial	SUCLG1		1.26313	0.649254
P53618	P53618	Coatomer subunit beta	COPB1		0.323499	0.768395
P53985	P53985	Monocarboxylate transporter 1	SLC16A1		0.690187	1.10318
P54709	P54709	Sodium/potassium-transporting ATPase subunit beta-3	ATP1B3		0.255404	0.677974
P55036;A2A3N6	P55036	26S proteasome non-ATPase regulatory subunit 4	PSMD4		0.0707287	-0.100653
P55060	P55060	Exportin-2	CSE1L		0.0687119	0.208047
P56192	P56192	Methionine--tRNA ligase, cytoplasmic	MARS		0.530751	0.423153
P56385	P56385	ATP synthase subunit e, mitochondrial	ATP5I		0.124933	-0.110152
P60660	P60660	Myosin light polypeptide 6	MYL6		0.00896803	0.010705
P60709;Q6S8J3;A5A3E0;P0CG38;P0CG39	P60709	Actin, cytoplasmic 1;Actin, cytoplasmic 1, N-terminally processed	ACTB		0.0597854	0.0722275
P60866	P60866	40S ribosomal protein S20	RPS20		1.18936	0.606629
P61254;Q9UNX3	P61254;Q9UNX3	60S ribosomal protein L26;60S ribosomal protein L26-like 1	RPL26;RPL26L1		0.243458	-0.506049
P61353	P61353	60S ribosomal protein L27	RPL27		0.349055	0.123829
P61978	P61978	Heterogeneous nuclear ribonucleoprotein K	HNRNPK		1.0491	0.498286
P62241	P62241	40S ribosomal protein S8	RPS8		0.0319585	-0.0454553
P62249	P62249	40S ribosomal protein S16	RPS16		0.503797	0.686081
P62269	P62269	40S ribosomal protein S18	RPS18		0.833002	0.789063
P62280	P62280	40S ribosomal protein S11	RPS11		0.630361	0.447631
P62314	P62314	Small nuclear ribonucleoprotein Sm D1	SNRPD1		0.302187	0.555789
P62316	P62316	Small nuclear ribonucleoprotein Sm D2	SNRPD2		0.584622	-0.194483
P62424	P62424	60S ribosomal protein L7a	RPL7A		0.566768	0.364134
P62491;Q15907	P62491;Q15907	Ras-related protein Rab-11A;Ras-related protein Rab-11B	RAB11A;RAB11B		0.535388	1.03672
P63267;P68133;P68032;P62736	P63267;P68133;P68032;P62736	Actin, gamma-enteric smooth muscle;Actin, alpha skeletal muscle;Actin, alpha cardiac muscle 1;Actin, aortic smooth muscle	ACTG2;ACTA1;ACTC1;ACTA2		0.314976	-0.229181
P62750	P62750	60S ribosomal protein L23a	RPL23A		0.754501	0.226199
P62753	P62753	40S ribosomal protein S6	RPS6		0.0414515	-0.0793877
P62805	P62805	Histone H4	HIST1H4A		0.120019	0.0766573
P62829	P62829	60S ribosomal protein L23	RPL23		0.892573	0.411119
P62910	P62910	60S ribosomal protein L32	RPL32		0.628279	0.742037
P62917	P62917	60S ribosomal protein L8	RPL8		0.647853	1.21958
P62937	P62937	Peptidyl-prolyl cis-trans isomerase A;Peptidyl-prolyl cis-trans isomerase A, N-terminally processed	PPIA		1.12015	0.707671
P62979;P62987;P0CG47;P0CG48	P62979;P62987;P0CG47;P0CG48	Ubiquitin-40S ribosomal protein S27a;Ubiquitin;40S ribosomal protein S27a;Ubiquitin-60S ribosomal protein L40;Ubiquitin;60S ribosomal protein L40;Polyubiquitin-B;Ubiquitin;Polyubiquitin-C;Ubiquitin	RPS27A;UBA52;UBB;UBC		0.289084	0.19934
P62995	P62995	Transformer-2 protein homolog beta	TRA2B		0.21563	-0.192979
P67809;Q9Y2T7	P67809	Nuclease-sensitive element-binding protein 1	YBX1		0.0598859	0.0676479
P68363;P68366;A6NHL2	P68363;P68366	Tubulin alpha-1B chain;Tubulin alpha-4A chain	TUBA1B;TUBA4A		0.802159	0.326502
P68371;P04350;Q3ZCM7	P68371;P04350	Tubulin beta-4B chain;Tubulin beta-4A chain	TUBB4B;TUBB4A		0.50563	0.26325
Q6NXT2;Q71DI3;Q16695;P84243;P68431	Q6NXT2;Q71DI3;Q16695;P84243;P68431	Histone H3.3C;Histone H3.2;Histone H3.1t;Histone H3.3;Histone H3.1	H3F3C;HIST2H3A;HIST3H3;H3F3A;HIST1H3A		0.43931	-0.374865
P78371	P78371	T-complex protein 1 subunit beta	CCT2		0.189873	0.29049
P78527	P78527	DNA-dependent protein kinase catalytic subunit	PRKDC		0.866389	1.13595
P81605	P81605	Dermcidin;Survival-promoting peptide;DCD-1	DCD		0.0880988	0.189285
P83881;Q969Q0	P83881;Q969Q0	60S ribosomal protein L36a;60S ribosomal protein L36a-like	RPL36A;RPL36AL		0.414761	0.6432
P84090	P84090	Enhancer of rudimentary homolog	ERH		0.086913	-0.0842037
P84098	P84098	60S ribosomal protein L19	RPL19		0.417347	0.35951
P98175;P52756;P78332	P98175	RNA-binding protein 10	RBM10		0.705165	0.860537
Q00325	Q00325	Phosphate carrier protein, mitochondrial	SLC25A3		0.552059	0.508367
Q01804	Q01804	OTU domain-containing protein 4	OTUD4		0.355295	0.330642
Q02878	Q02878	60S ribosomal protein L6	RPL6		0.245391	0.262794
Q06278	Q06278	Aldehyde oxidase	AOX1		0.625724	-1.57653
Q06830;Q13162	Q06830	Peroxiredoxin-1	PRDX1		0.0947032	0.086436
Q08378	Q08378	Golgin subfamily A member 3	GOLGA3		0.0382891	-0.0286694
Q13200	Q13200	26S proteasome non-ATPase regulatory subunit 2	PSMD2		0.726587	-0.919578
Q13813	Q13813	Spectrin alpha chain, non-erythrocytic 1	SPTAN1		0.118005	-0.180008
Q14204	Q14204	Cytoplasmic dynein 1 heavy chain 1	DYNC1H1		0.0223038	-0.0419525
Q14257	Q14257	Reticulocalbin-2	RCN2		0.0223109	-0.0369501
Q14574	Q14574	Desmocollin-3	DSC3		0.0393296	0.0470511
Q14974	Q14974	Importin subunit beta-1	KPNB1		0.332805	0.416865
Q15041	Q15041	ADP-ribosylation factor-like protein 6-interacting protein 1	ARL6IP1		0.856813	1.44113
Q15208	Q15208	Serine/threonine-protein kinase 38	STK38		0.22325	0.0949637
Q15233	Q15233	Non-POU domain-containing octamer-binding protein	NONO		0.0548972	-0.0456518
Q15365;Q15366;P57721;P57723	Q15365;Q15366;P57721	Poly(rC)-binding protein 1;Poly(rC)-binding protein 2;Poly(rC)-binding protein 3	PCBP1;PCBP2;PCBP3		0.384095	0.479056
Q15750	Q15750	TGF-beta-activated kinase 1 and MAP3K7-binding protein 1	TAB1		1.0983	-0.974933
Q15758	Q15758	Neutral amino acid transporter B(0)	SLC1A5		0.323385	0.560704
Q16531	Q16531	DNA damage-binding protein 1	DDB1		0.436197	0.463813
Q16718	Q16718	NADH dehydrogenase [ubiquinone] 1 alpha subcomplex subunit 5	NDUFA5		1.158	1.81042
Q16769	Q16769	Glutaminyl-peptide cyclotransferase	QPCT		0.84642	1.32988
Q16875	Q16875	6-phosphofructo-2-kinase/fructose-2,6-bisphosphatase 3;6-phosphofructo-2-kinase;Fructose-2,6-bisphosphatase	PFKFB3		0.386256	-0.306463
Q16891	Q16891	MICOS complex subunit MIC60	IMMT		0.487029	0.42836
Q5SWX8	Q5SWX8	Protein odr-4 homolog	ODR4		0.224615	0.248895
Q5UIP0	Q5UIP0	Telomere-associated protein RIF1	RIF1		1.0356	1.40664
Q5W0B1	Q5W0B1	RING finger protein 219	RNF219		0.148985	0.128217
Q6N021	Q6N021	Methylcytosine dioxygenase TET2	TET2		0.248006	0.188637
Q7Z353	Q7Z353	Highly divergent homeobox	HDX		0.37617	0.128142
Q7Z406	Q7Z406	Myosin-14	MYH14		0.0668628	0.100053
Q8N1I0;Q8IZD9	Q8N1I0	Dedicator of cytokinesis protein 4	DOCK4		0.118986	-0.0899852
Q8NFU7	Q8NFU7	Methylcytosine dioxygenase TET1	TET1		0.631042	-0.242823
Q8WUH6	Q8WUH6	Transmembrane protein 263	TMEM263		0.170727	0.297671
Q8WXF1	Q8WXF1	Paraspeckle component 1	PSPC1		0.0998358	-0.0837412
Q92552	Q92552	28S ribosomal protein S27, mitochondrial	MRPS27		0.210178	-0.356131
Q92600	Q92600	Cell differentiation protein RCD1 homolog	RQCD1		0.77471	0.946398
Q92841;P17844	Q92841	Probable ATP-dependent RNA helicase DDX17	DDX17		0.645257	0.453501
Q92945	Q92945	Far upstream element-binding protein 2	KHSRP		0.00988997	-0.00826772
Q93100	Q93100	Phosphorylase b kinase regulatory subunit beta	PHKB		0.0215938	0.0156205
Q96AG4	Q96AG4	Leucine-rich repeat-containing protein 59	LRRC59		0.73144	0.943333
Q96DG6	Q96DG6	Carboxymethylenebutenolidase homolog	CMBL		0.148453	-0.114609
Q96DX5	Q96DX5	Ankyrin repeat and SOCS box protein 9	ASB9		0.579787	-0.481457
Q96IX5	Q96IX5	Up-regulated during skeletal muscle growth protein 5	USMG5		0.580503	0.87209
Q96JJ3;Q92556	Q96JJ3	Engulfment and cell motility protein 2	ELMO2		0.159093	-0.140324
Q99417	Q99417	C-Myc-binding protein	MYCBP		0.143424	-0.127376
Q99623	Q99623	Prohibitin-2	PHB2		0.302146	0.200861
Q99832	Q99832	T-complex protein 1 subunit eta	CCT7		0.0217521	-0.0164601
Q9BQA1	Q9BQA1	Methylosome protein 50	WDR77		0.00347592	0.00294113
Q9BRS2	Q9BRS2	Serine/threonine-protein kinase RIO1	RIOK1		0.112424	-0.0670185
Q9BSD7	Q9BSD7	Cancer-related nucleoside-triphosphatase	NTPCR		0.112393	-0.16171
Q9BUA3	Q9BUA3	Uncharacterized protein C11orf84	C11orf84		0.186103	-0.154192
Q9H3K6	Q9H3K6	BolA-like protein 2	BOLA2		0.171394	-0.152106
Q9H9B4;Q9BWM7	Q9H9B4	Sideroflexin-1	SFXN1		0.971456	0.751549
Q9HCK1	Q9HCK1	DBF4-type zinc finger-containing protein 2	ZDBF2		0.0384202	-0.0870412
Q9NX63	Q9NX63	MICOS complex subunit MIC19	CHCHD3		0.765058	1.53234
Q9NYF8	Q9NYF8	Bcl-2-associated transcription factor 1	BCLAF1		0.0666003	0.0601187
Q9NYL9;Q9NZR1	Q9NYL9;Q9NZR1	Tropomodulin-3;Tropomodulin-2	TMOD3;TMOD2		0.272291	-0.259874
Q9UFE4	Q9UFE4	Coiled-coil domain-containing protein 39	CCDC39		0.428977	0.611264
Q9UH99;O94901	Q9UH99	SUN domain-containing protein 2	SUN2		0.70295	0.822222
Q9Y230	Q9Y230	RuvB-like 2	RUVBL2		0.0685721	-0.0575511
Q9Y2H1	Q9Y2H1	Serine/threonine-protein kinase 38-like	STK38L		0.30081	-0.178346
Q9Y2W1	Q9Y2W1	Thyroid hormone receptor-associated protein 3	THRAP3		0.31033	0.318601
Q9Y3B3	Q9Y3B3	Transmembrane emp24 domain-containing protein 7	TMED7		1.11191	1.17442
Q9Y5S9	Q9Y5S9	RNA-binding protein 8A	RBM8A		0.0861518	0.144963
Q9Y657;Q5JUX0;Q56A73;Q9BPZ2;Q99865	Q9Y657	Spindlin-1	SPIN1		0.122193	0.112401

## Sheet: Raw & normalised, LotB ; SdcA
Protein IDs	Majority protein IDs	Peptide counts (all)	Peptide counts (razor+unique)	Peptide counts (unique)	Protein names	Gene names	Fasta headers	Number of proteins	Peptides	Razor + unique peptides	Unique peptides	Peptides A1-tmt9test	Peptides A2-tmt9test	Peptides c1-tmt9test	Peptides c2-tmt9test	Razor + unique peptides A1-tmt9test	Razor + unique peptides A2-tmt9test	Razor + unique peptides c1-tmt9test	Razor + unique peptides c2-tmt9test	Unique peptides A1-tmt9test	Unique peptides A2-tmt9test	Unique peptides c1-tmt9test	Unique peptides c2-tmt9test	Sequence coverage [%]	Unique + razor sequence coverage [%]	Unique sequence coverage [%]	Mol. weight [kDa]	Sequence length	Sequence lengths	Q-value	Score	Identification type A1-tmt9test	Identification type A2-tmt9test	Identification type c1-tmt9test	Identification type c2-tmt9test	Reporter intensity corrected 1	Reporter intensity corrected 2	Reporter intensity corrected 3	Reporter intensity corrected 4	Reporter intensity corrected 5	Reporter intensity corrected 6	Reporter intensity corrected 7	Reporter intensity corrected 8	Reporter intensity corrected 9	Reporter intensity corrected 10	Reporter intensity 1	Reporter intensity 2	Reporter intensity 3	Reporter intensity 4
A2NJV5;A0A0A0MRZ7;A0A075B6S2;A0A075B6S6;A0A075B6P5;A0A087WW87;P06310;P01615;P01614	A2NJV5;A0A0A0MRZ7;A0A075B6S2;A0A075B6S6;A0A075B6P5;A0A087WW87;P06310;P01615;P01614	3;3;3;2;2;2;2;2;2	3;3;3;2;2;2;2;2;2	3;3;3;2;2;2;2;2;2	Ig kappa chain V-II region RPMI 6410;Ig kappa chain V-II region FR;Ig kappa chain V-II region Cum	IGKV A18;IGKV2D-26;IGKV2D-29;IGKV2D-30;IGKV2D-28;IGKV2-40	sp|A2NJV5|KV229_HUMAN Immunoglobulin kappa variable 2-29 OS=Homo sapiens GN=IGKV2-29 PE=3 SV=2;sp|A0A0A0MRZ7|KVD26_HUMAN Immunoglobulin kappa variable 2D-26 OS=Homo sapiens GN=IGKV2D-26 PE=3 SV=1;sp|A0A075B6S2|KVD29_HUMAN Immunoglobulin kappa variable 2D-2	9	3	3	3	3	3	3	3	3	3	3	3	3	3	3	3	19.2	19.2	19.2	13.085	120	120;120;120;120;120;121;120;120;121	0	160.18	By MS/MS	By MS/MS	By MS/MS	By MS/MS	8316.7	1466700	1500700	1658600	3308800	2312200	2353900	1859700	2523900	2726400	16172	1386600	1445500	1716200
A0A0C4DH31;P23083	A0A0C4DH31;P23083	1;1	1;1	1;1	Ig heavy chain V-I region V35	IGHV1-18	sp|A0A0C4DH31|HV118_HUMAN Immunoglobulin heavy variable 1-18 OS=Homo sapiens GN=IGHV1-18 PE=3 SV=1;sp|P23083|HV102_HUMAN Immunoglobulin heavy variable 1-2 OS=Homo sapiens GN=IGHV1-2 PE=1 SV=2	2	1	1	1	1	1	1	1	1	1	1	1	1	1	1	1	9.4	9.4	9.4	12.82	117	117;117	0	4.3223	By MS/MS	By MS/MS	By MS/MS	By MS/MS	0	21644	16482	17830	109580	40746	42263	26334	35727	37147	0	20485	16896	19293
A0A0C4DH68	A0A0C4DH68	1	1	1		IGKV2-24	sp|A0A0C4DH68|KV224_HUMAN Immunoglobulin kappa variable 2-24 OS=Homo sapiens GN=IGKV2-24 PE=3 SV=1	1	1	1	1	1	0	0	0	1	0	0	0	1	0	0	0	10.8	10.8	10.8	13.079	120	120	0.0074074	1.1488	By MS/MS				0	0	0	0	0	0	0	0	0	0	0	0	0	0
A5YKK6	A5YKK6	9	9	9	CCR4-NOT transcription complex subunit 1	CNOT1	sp|A5YKK6|CNOT1_HUMAN CCR4-NOT transcription complex subunit 1 OS=Homo sapiens GN=CNOT1 PE=1 SV=2	1	9	9	9	9	9	8	6	9	9	8	6	9	9	8	6	3.7	3.7	3.7	266.94	2376	2376	0	14.095	By MS/MS	By MS/MS	By MS/MS	By MS/MS	847.81	122450	109420	122210	99019	92493	91126	75574	93028	92472	1180.1	114950	103420	125360
Q5TAQ9;A6NGE4;P0C7V8	Q5TAQ9;A6NGE4;P0C7V8	1;1;1	1;1;1	1;1;1	DDB1- and CUL4-associated factor 8;DDB1- and CUL4-associated factor 8-like protein 1;DDB1- and CUL4-associated factor 8-like protein 2	DCAF8;DCAF8L1;DCAF8L2	sp|Q5TAQ9|DCAF8_HUMAN DDB1- and CUL4-associated factor 8 OS=Homo sapiens GN=DCAF8 PE=1 SV=1;sp|A6NGE4|DC8L1_HUMAN DDB1- and CUL4-associated factor 8-like protein 1 OS=Homo sapiens GN=DCAF8L1 PE=2 SV=1;sp|P0C7V8|DC8L2_HUMAN DDB1- and CUL4-associated factor	3	1	1	1	1	1	1	1	1	1	1	1	1	1	1	1	1.5	1.5	1.5	66.851	597	597;600;631	0.0074257	1.1498	By matching	By matching	By MS/MS	By matching	69.23	15877	13235	13522	29407	17780	21676	12273	14669	24222	163.14	14938	12751	14239
A6NHL2	A6NHL2	4	1	1	Tubulin alpha chain-like 3	TUBAL3	sp|A6NHL2|TBAL3_HUMAN Tubulin alpha chain-like 3 OS=Homo sapiens GN=TUBAL3 PE=1 SV=2	1	4	1	1	3	4	2	4	0	1	0	1	0	1	0	1	10.3	3.8	3.8	49.908	446	446	0.0075094	1.1759	By matching	By matching	By matching	By MS/MS	0	10196	8592.6	9106.8	8751.1	8525.4	8405.5	6925.3	14358	10539	0	9573.6	8130.5	9461.4
P62308;A8MWD9	P62308;A8MWD9	2;2	2;2	2;2	Small nuclear ribonucleoprotein G;Putative small nuclear ribonucleoprotein G-like protein 15	SNRPG;SNRPGP15	sp|P62308|RUXG_HUMAN Small nuclear ribonucleoprotein G OS=Homo sapiens GN=SNRPG PE=1 SV=1;sp|A8MWD9|RUXGL_HUMAN Putative small nuclear ribonucleoprotein G-like protein 15 OS=Homo sapiens GN=SNRPGP15 PE=5 SV=2	2	2	2	2	1	2	1	2	1	2	1	2	1	2	1	2	26.3	26.3	26.3	8.496	76	76;76	0	3.3471	By MS/MS	By MS/MS	By matching	By MS/MS	142.46	41934	34080	35298	29868	31598	29376	23822	40940	35982	183.65	39340	32190	36804
Q99613;B5ME19	Q99613;B5ME19	7;7	7;7	7;7	Eukaryotic translation initiation factor 3 subunit C;Eukaryotic translation initiation factor 3 subunit C-like protein	EIF3C;EIF3CL	sp|Q99613|EIF3C_HUMAN Eukaryotic translation initiation factor 3 subunit C OS=Homo sapiens GN=EIF3C PE=1 SV=1;sp|B5ME19|EIFCL_HUMAN Eukaryotic translation initiation factor 3 subunit C-like protein OS=Homo sapiens GN=EIF3CL PE=3 SV=1	2	7	7	7	0	5	1	5	0	5	1	5	0	5	1	5	8.7	8.7	8.7	105.34	913	913;914	0	19.953		By MS/MS	By matching	By MS/MS	287.16	88260	90349	102780	88684	101540	90975	75609	122380	82498	555.59	83166	85464	105030
H7BZ55	H7BZ55	1	1	1	Putative ciliary rootlet coiled-coil protein-like 3 protein		sp|H7BZ55|CRCC2_HUMAN Putative ciliary rootlet coiled-coil protein 2 OS=Homo sapiens GN=CROCC2 PE=5 SV=3	1	1	1	1	1	1	0	0	1	1	0	0	1	1	0	0	0.4	0.4	0.4	185.87	1655	1655	0	1.8336	By matching	By MS/MS			0	16242	16108	11640	3670.8	5322.9	3851	3903.8	5871.9	2140.3	0	15178	15064	12170
O00159	O00159	4	4	4	Unconventional myosin-Ic	MYO1C	sp|O00159|MYO1C_HUMAN Unconventional myosin-Ic OS=Homo sapiens GN=MYO1C PE=1 SV=4	1	4	4	4	3	4	3	4	3	4	3	4	3	4	3	4	4	4	4	121.68	1063	1063	0	16.506	By matching	By MS/MS	By matching	By MS/MS	293.82	60378	63317	68241	58438	67647	64871	63484	105540	77914	592.63	56872	59848	69868
O00165	O00165	2	2	2	HCLS1-associated protein X-1	HAX1	sp|O00165|HAX1_HUMAN HCLS1-associated protein X-1 OS=Homo sapiens GN=HAX1 PE=1 SV=2	1	2	2	2	1	1	2	0	1	1	2	0	1	1	2	0	6.5	6.5	6.5	31.62	279	279	0	2.2466	By matching	By matching	By MS/MS		0	12897	8777.7	11906	21826	13283	17904	9900.6	10751	18736	0	12129	8486.3	12396
O00217	O00217	1	1	1	NADH dehydrogenase [ubiquinone] iron-sulfur protein 8, mitochondrial	NDUFS8	sp|O00217|NDUS8_HUMAN NADH dehydrogenase [ubiquinone] iron-sulfur protein 8, mitochondrial OS=Homo sapiens GN=NDUFS8 PE=1 SV=1	1	1	1	1	1	1	0	1	1	1	0	1	1	1	0	1	3.8	3.8	3.8	23.705	210	210	0	1.7356	By MS/MS	By MS/MS		By MS/MS	116.48	11779	8526.5	10613	9913.4	11637	9277.9	8438.8	10911	13152	140.66	11074	8093.3	11065
O00231	O00231	3	3	3	26S proteasome non-ATPase regulatory subunit 11	PSMD11	sp|O00231|PSD11_HUMAN 26S proteasome non-ATPase regulatory subunit 11 OS=Homo sapiens GN=PSMD11 PE=1 SV=3	1	3	3	3	0	3	0	3	0	3	0	3	0	3	0	3	9.7	9.7	9.7	47.463	422	422	0	10.811		By MS/MS		By MS/MS	216.21	38768	37606	40400	32240	35129	31110	30023	47684	39759	246.43	36442	35514	41444
O00232	O00232	1	1	1	26S proteasome non-ATPase regulatory subunit 12	PSMD12	sp|O00232|PSD12_HUMAN 26S proteasome non-ATPase regulatory subunit 12 OS=Homo sapiens GN=PSMD12 PE=1 SV=3	1	1	1	1	1	1	1	1	1	1	1	1	1	1	1	1	1.5	1.5	1.5	52.904	456	456	0	1.9236	By matching	By MS/MS	By MS/MS	By MS/MS	0	6217.5	5147.4	6979.9	5591.3	4980.1	5969.1	4868	5111.4	5017.5	0	5841.5	4875.5	7096.9
O00264	O00264	5	5	4	Membrane-associated progesterone receptor component 1	PGRMC1	sp|O00264|PGRC1_HUMAN Membrane-associated progesterone receptor component 1 OS=Homo sapiens GN=PGRMC1 PE=1 SV=3	1	5	5	4	5	5	4	5	5	5	4	5	4	4	3	4	21	21	16.4	21.671	195	195	0	28.029	By MS/MS	By MS/MS	By MS/MS	By MS/MS	1827.1	216480	157970	170810	261050	195130	204920	154800	180910	259050	2610.4	203280	151000	180200
O00268;Q92750	O00268	8;1	8;1	8;1	Transcription initiation factor TFIID subunit 4	TAF4	sp|O00268|TAF4_HUMAN Transcription initiation factor TFIID subunit 4 OS=Homo sapiens GN=TAF4 PE=1 SV=2	2	8	8	8	1	7	4	5	1	7	4	5	1	7	4	5	7.7	7.7	7.7	110.11	1085	1085;862	0	23.548	By matching	By MS/MS	By matching	By MS/MS	210.81	85850	83150	88745	75317	91223	77562	65371	107550	69375	434.94	80797	78563	91466
O00303	O00303	4	4	4	Eukaryotic translation initiation factor 3 subunit F	EIF3F	sp|O00303|EIF3F_HUMAN Eukaryotic translation initiation factor 3 subunit F OS=Homo sapiens GN=EIF3F PE=1 SV=1	1	4	4	4	2	4	1	4	2	4	1	4	2	4	1	4	13.7	13.7	13.7	37.563	357	357	0	13.135	By matching	By MS/MS	By matching	By MS/MS	0	50965	36093	41390	33882	42661	38398	31065	51834	38443	0	47838	34112	43434
O00410	O00410	9	9	9	Importin-5	IPO5	sp|O00410|IPO5_HUMAN Importin-5 OS=Homo sapiens GN=IPO5 PE=1 SV=4	1	9	9	9	3	7	3	8	3	7	3	8	3	7	3	8	12.2	12.2	12.2	123.63	1097	1097	0	30.291	By MS/MS	By MS/MS	By MS/MS	By MS/MS	90.369	60111	54820	66647	61695	61138	58029	46572	76608	66776	105.12	56570	51960	68184
O00422	O00422	10	10	10	Histone deacetylase complex subunit SAP18	SAP18	sp|O00422|SAP18_HUMAN Histone deacetylase complex subunit SAP18 OS=Homo sapiens GN=SAP18 PE=1 SV=1	1	10	10	10	4	10	3	8	4	10	3	8	4	10	3	8	60.1	60.1	60.1	17.561	153	153	0	22.978	By MS/MS	By MS/MS	By matching	By MS/MS	526.86	190160	178070	201710	144790	186290	175730	145140	225130	185920	1143.3	178870	168020	206970
O00425	O00425	10	9	9	Insulin-like growth factor 2 mRNA-binding protein 3	IGF2BP3	sp|O00425|IF2B3_HUMAN Insulin-like growth factor 2 mRNA-binding protein 3 OS=Homo sapiens GN=IGF2BP3 PE=1 SV=2	1	10	9	9	0	10	1	7	0	9	1	6	0	9	1	6	21.8	19.5	19.5	63.704	579	579	0	27.112		By MS/MS	By matching	By MS/MS	259.64	92066	87598	91584	76058	85160	82129	56718	95186	68892	495.7	86540	82721	94395
O00487	O00487	2	2	2	26S proteasome non-ATPase regulatory subunit 14	PSMD14	sp|O00487|PSDE_HUMAN 26S proteasome non-ATPase regulatory subunit 14 OS=Homo sapiens GN=PSMD14 PE=1 SV=1	1	2	2	2	0	1	0	1	0	1	0	1	0	1	0	1	15.2	15.2	15.2	34.577	310	310	0	7.1796		By MS/MS		By MS/MS	0	1367	1491.1	1531.9	1236.1	1286.3	1386.9	1334.3	2303.6	2200.6	0	1285.8	1407	1562.9
O15523;O00571	O15523;O00571	2;2	2;2	2;2	ATP-dependent RNA helicase DDX3Y;ATP-dependent RNA helicase DDX3X	DDX3Y;DDX3X	sp|O15523|DDX3Y_HUMAN ATP-dependent RNA helicase DDX3Y OS=Homo sapiens GN=DDX3Y PE=1 SV=2;sp|O00571|DDX3X_HUMAN ATP-dependent RNA helicase DDX3X OS=Homo sapiens GN=DDX3X PE=1 SV=3	2	2	2	2	1	1	0	2	1	1	0	2	1	1	0	2	2.9	2.9	2.9	73.153	660	660;662	0	4.4603	By matching	By MS/MS		By MS/MS	144.46	28358	19967	31126	20065	21298	19459	15731	27191	24241	283.37	26630	18899	31668
O14561	O14561	1	1	1	Acyl carrier protein, mitochondrial	NDUFAB1	sp|O14561|ACPM_HUMAN Acyl carrier protein, mitochondrial OS=Homo sapiens GN=NDUFAB1 PE=1 SV=3	1	1	1	1	1	1	1	1	1	1	1	1	1	1	1	1	5.8	5.8	5.8	17.417	156	156	0.0040431	1.5518	By matching	By MS/MS	By matching	By MS/MS	84.735	22031	36335	37249	24121	31314	27169	19623	32359	22653	349.8	20847	34207	37214
O14579	O14579	1	1	1	Coatomer subunit epsilon	COPE	sp|O14579|COPE_HUMAN Coatomer subunit epsilon OS=Homo sapiens GN=COPE PE=1 SV=3	1	1	1	1	0	1	1	1	0	1	1	1	0	1	1	1	5.5	5.5	5.5	34.482	308	308	0	5.5842		By matching	By MS/MS	By MS/MS	0	10516	7852.5	10012	10088	9094	9020.3	7249.8	16354	11309	0	9878.5	7459.6	10346
O14654	O14654	4	4	4	Insulin receptor substrate 4	IRS4	sp|O14654|IRS4_HUMAN Insulin receptor substrate 4 OS=Homo sapiens GN=IRS4 PE=1 SV=1	1	4	4	4	3	3	3	3	3	3	3	3	3	3	3	3	3.3	3.3	3.3	133.77	1257	1257	0	17.358	By MS/MS	By MS/MS	By MS/MS	By MS/MS	1357.2	91043	68740	77548	73144	77017	72194	63432	85335	83776	1414.9	85476	65181	80985
O14744	O14744	47	47	47	Protein arginine N-methyltransferase 5;Protein arginine N-methyltransferase 5, N-terminally processed	PRMT5	sp|O14744|ANM5_HUMAN Protein arginine N-methyltransferase 5 OS=Homo sapiens GN=PRMT5 PE=1 SV=4	1	47	47	47	36	45	40	47	36	45	40	47	36	45	40	47	73.5	73.5	73.5	72.683	637	637	0	323.31	By MS/MS	By MS/MS	By MS/MS	By MS/MS	10368	3900000	4105400	4390800	4391000	3990700	4261700	3156700	4294700	4248900	27135	3670700	3888300	4486700
P19105;O14950;P24844	P19105;O14950;P24844	8;8;5	8;8;5	8;8;5	Myosin regulatory light chain 12A;Myosin regulatory light chain 12B;Myosin regulatory light polypeptide 9	MYL12A;MYL12B;MYL9	sp|P19105|ML12A_HUMAN Myosin regulatory light chain 12A OS=Homo sapiens GN=MYL12A PE=1 SV=2;sp|O14950|ML12B_HUMAN Myosin regulatory light chain 12B OS=Homo sapiens GN=MYL12B PE=1 SV=2;sp|P24844|MYL9_HUMAN Myosin regulatory light polypeptide 9 OS=Homo sapie	3	8	8	8	7	6	6	6	7	6	6	6	7	6	6	6	60.2	60.2	60.2	19.794	171	171;172;172	0	32.189	By MS/MS	By MS/MS	By MS/MS	By MS/MS	1118	237070	177900	215220	584680	301420	256710	236280	275260	262460	1613.3	223380	174070	226030
O14980	O14980	12	12	12	Exportin-1	XPO1	sp|O14980|XPO1_HUMAN Exportin-1 OS=Homo sapiens GN=XPO1 PE=1 SV=1	1	12	12	12	3	8	6	9	3	8	6	9	3	8	6	9	15.1	15.1	15.1	123.38	1071	1071	0	41.525	By matching	By MS/MS	By MS/MS	By MS/MS	233.9	127010	121440	134570	134140	117370	124940	87113	156770	135680	497.88	119420	115070	137910
O15020	O15020	5	2	2	Spectrin beta chain, non-erythrocytic 2	SPTBN2	sp|O15020|SPTN2_HUMAN Spectrin beta chain, non-erythrocytic 2 OS=Homo sapiens GN=SPTBN2 PE=1 SV=3	1	5	2	2	3	5	4	5	2	2	2	2	2	2	2	2	1.7	0.6	0.6	271.32	2390	2390	0.0039526	1.3865	By MS/MS	By MS/MS	By MS/MS	By MS/MS	114.38	26574	26201	27825	24505	42208	35858	25944	42986	30687	218.93	25115	24770	29021
O15042	O15042	16	16	16	U2 snRNP-associated SURP motif-containing protein	U2SURP	sp|O15042|SR140_HUMAN U2 snRNP-associated SURP motif-containing protein OS=Homo sapiens GN=U2SURP PE=1 SV=2	1	16	16	16	2	14	1	16	2	14	1	16	2	14	1	16	14.4	14.4	14.4	118.29	1029	1029	0	35.801	By matching	By MS/MS	By matching	By MS/MS	702.4	259130	282950	305350	308210	397210	324150	262500	390480	283610	1473.5	244930	268070	314400
O15127	O15127	1	1	1	Secretory carrier-associated membrane protein 2	SCAMP2	sp|O15127|SCAM2_HUMAN Secretory carrier-associated membrane protein 2 OS=Homo sapiens GN=SCAMP2 PE=1 SV=2	1	1	1	1	1	1	0	1	1	1	0	1	1	1	0	1	3.6	3.6	3.6	36.648	329	329	0	3.0993	By matching	By MS/MS		By matching	0	4934.4	6685.7	7455.9	6759.8	8174.8	7256.9	5406.7	6968.3	4203.4	0	4674.6	6325.5	7537.4
O15173	O15173	3	2	2	Membrane-associated progesterone receptor component 2	PGRMC2	sp|O15173|PGRC2_HUMAN Membrane-associated progesterone receptor component 2 OS=Homo sapiens GN=PGRMC2 PE=1 SV=1	1	3	2	2	1	3	1	3	0	2	0	2	0	2	0	2	19.3	15.2	15.2	23.818	223	223	0	11.01	By matching	By MS/MS	By matching	By MS/MS	0	12072	10746	11615	8631.7	10144	9316.6	7146.4	11912	8694.3	0	11338	10136	11981
O15234	O15234	3	3	3	Protein CASC3	CASC3	sp|O15234|CASC3_HUMAN Protein CASC3 OS=Homo sapiens GN=CASC3 PE=1 SV=2	1	3	3	3	2	3	1	3	2	3	1	3	2	3	1	3	5.3	5.3	5.3	76.277	703	703	0	37.186	By matching	By MS/MS	By matching	By MS/MS	5.4977	48187	51519	54058	40795	48135	43878	39740	58799	46713	193.2	45344	48586	55225
O15260	O15260	1	1	1	Surfeit locus protein 4	SURF4	sp|O15260|SURF4_HUMAN Surfeit locus protein 4 OS=Homo sapiens GN=SURF4 PE=1 SV=3	1	1	1	1	1	1	1	1	1	1	1	1	1	1	1	1	3	3	3	30.394	269	269	0.0039474	1.3851	By MS/MS	By matching	By MS/MS	By matching	0	8915.3	6481.5	8498.7	11589	10742	11154	8128.8	7358.3	14711	0	8397.4	6202.8	8862.5
O15294	O15294	25	25	25	UDP-N-acetylglucosamine--peptide N-acetylglucosaminyltransferase 110 kDa subunit	OGT	sp|O15294|OGT1_HUMAN UDP-N-acetylglucosamine--peptide N-acetylglucosaminyltransferase 110 kDa subunit OS=Homo sapiens GN=OGT PE=1 SV=3	1	25	25	25	18	22	15	17	18	22	15	17	18	22	15	17	30.6	30.6	30.6	116.92	1046	1046	0	154.23	By MS/MS	By MS/MS	By MS/MS	By MS/MS	2128.1	519990	488720	539240	500780	480770	483230	363090	469030	513840	3761.5	488860	462640	553680
O15371	O15371	2	2	2	Eukaryotic translation initiation factor 3 subunit D	EIF3D	sp|O15371|EIF3D_HUMAN Eukaryotic translation initiation factor 3 subunit D OS=Homo sapiens GN=EIF3D PE=1 SV=1	1	2	2	2	0	2	0	2	0	2	0	2	0	2	0	2	3.8	3.8	3.8	63.972	548	548	0	2.9435		By MS/MS		By matching	93.198	12152	13322	15682	13449	16814	15424	12588	18589	10241	165.95	11477	12611	15968
O15372	O15372	3	3	3	Eukaryotic translation initiation factor 3 subunit H	EIF3H	sp|O15372|EIF3H_HUMAN Eukaryotic translation initiation factor 3 subunit H OS=Homo sapiens GN=EIF3H PE=1 SV=1	1	3	3	3	1	3	2	2	1	3	2	2	1	3	2	2	10.5	10.5	10.5	39.93	352	352	0	24.52	By MS/MS	By MS/MS	By matching	By MS/MS	127.89	41826	38575	46724	40484	45629	41958	35648	58402	50403	326.88	39386	36527	47854
O15397	O15397	30	30	29	Importin-8	IPO8	sp|O15397|IPO8_HUMAN Importin-8 OS=Homo sapiens GN=IPO8 PE=1 SV=2	1	30	30	29	25	28	23	30	25	28	23	30	24	27	22	29	32	32	31.1	119.94	1037	1037	0	299.98	By MS/MS	By MS/MS	By MS/MS	By MS/MS	2286	953600	875780	957860	1116100	940110	937490	739090	1002700	1079500	4938.3	896830	831990	987930
O15499	O15499	1	1	1	Homeobox protein goosecoid-2	GSC2	sp|O15499|GSC2_HUMAN Homeobox protein goosecoid-2 OS=Homo sapiens GN=GSC2 PE=2 SV=1	1	1	1	1	1	1	0	0	1	1	0	0	1	1	0	0	5.4	5.4	5.4	21.545	205	205	0	1.7981	By MS/MS	By MS/MS			0	2757.5	1075.7	2224.4	2314	2927.9	1870.6	2518.5	1834.7	3086.9	0	2592.9	1034.9	2352.7
O43143	O43143	16	16	16	Pre-mRNA-splicing factor ATP-dependent RNA helicase DHX15	DHX15	sp|O43143|DHX15_HUMAN Pre-mRNA-splicing factor ATP-dependent RNA helicase DHX15 OS=Homo sapiens GN=DHX15 PE=1 SV=2	1	16	16	16	0	16	2	16	0	16	2	16	0	16	2	16	22	22	22	90.932	795	795	0	41.707		By MS/MS	By matching	By MS/MS	1069.9	337110	321770	357260	304960	353300	334070	261130	396630	318240	1999.2	317270	304220	367240
O43167	O43167	1	1	1	Zinc finger and BTB domain-containing protein 24	ZBTB24	sp|O43167|ZBT24_HUMAN Zinc finger and BTB domain-containing protein 24 OS=Homo sapiens GN=ZBTB24 PE=1 SV=2	1	1	1	1	0	1	0	1	0	1	0	1	0	1	0	1	1.9	1.9	1.9	78.281	697	697	0	2.3572		By MS/MS		By matching	0	3778	3313.5	4215.6	3840.3	4043.7	3875.1	3629	4264.4	3191.1	0	3557	3141.8	4315.9
O43175	O43175	14	14	14	D-3-phosphoglycerate dehydrogenase	PHGDH	sp|O43175|SERA_HUMAN D-3-phosphoglycerate dehydrogenase OS=Homo sapiens GN=PHGDH PE=1 SV=4	1	14	14	14	11	12	12	12	11	12	12	12	11	12	12	12	31.7	31.7	31.7	56.65	533	533	0	128.34	By MS/MS	By MS/MS	By MS/MS	By MS/MS	1519.9	561110	435850	548010	575460	534620	521800	389370	462540	580460	3051	527500	414360	566230
O43242	O43242	9	9	9	26S proteasome non-ATPase regulatory subunit 3	PSMD3	sp|O43242|PSMD3_HUMAN 26S proteasome non-ATPase regulatory subunit 3 OS=Homo sapiens GN=PSMD3 PE=1 SV=2	1	9	9	9	4	9	3	9	4	9	3	9	4	9	3	9	19.5	19.5	19.5	60.977	534	534	0	44.261	By MS/MS	By MS/MS	By matching	By MS/MS	347.04	100460	98189	110420	96994	117650	103750	94805	148600	124190	537.02	94657	92891	113470
O43318	O43318	7	7	7	Mitogen-activated protein kinase kinase kinase 7	MAP3K7	sp|O43318|M3K7_HUMAN Mitogen-activated protein kinase kinase kinase 7 OS=Homo sapiens GN=MAP3K7 PE=1 SV=1	1	7	7	7	2	7	4	6	2	7	4	6	2	7	4	6	12.9	12.9	12.9	67.195	606	606	0	16.126	By MS/MS	By MS/MS	By MS/MS	By MS/MS	77.833	92281	87027	87880	67270	90613	86933	49372	84947	70631	156.66	86766	82053	91096
O43324	O43324	1	1	1	Eukaryotic translation elongation factor 1 epsilon-1	EEF1E1	sp|O43324|MCA3_HUMAN Eukaryotic translation elongation factor 1 epsilon-1 OS=Homo sapiens GN=EEF1E1 PE=1 SV=1	1	1	1	1	1	1	1	1	1	1	1	1	1	1	1	1	6.3	6.3	6.3	19.81	174	174	0	4.6679	By MS/MS	By matching	By MS/MS	By MS/MS	136.56	21573	20155	23309	38741	21817	24888	21597	28162	29377	182.88	20299	19336	23897
O43402	O43402	1	1	1	ER membrane protein complex subunit 8	EMC8	sp|O43402|EMC8_HUMAN ER membrane protein complex subunit 8 OS=Homo sapiens GN=EMC8 PE=1 SV=1	1	1	1	1	1	1	1	1	1	1	1	1	1	1	1	1	5.7	5.7	5.7	23.773	210	210	0	2.8066	By matching	By matching	By MS/MS	By matching	0	12110	13413	13658	20660	17209	21873	13987	15061	21634	0	11434	12789	14085
O43491;Q9Y2J2	O43491;Q9Y2J2	1;1	1;1	1;1	Band 4.1-like protein 2;Band 4.1-like protein 3;Band 4.1-like protein 3, N-terminally processed	EPB41L2;EPB41L3	sp|O43491|E41L2_HUMAN Band 4.1-like protein 2 OS=Homo sapiens GN=EPB41L2 PE=1 SV=1;sp|Q9Y2J2|E41L3_HUMAN Band 4.1-like protein 3 OS=Homo sapiens GN=EPB41L3 PE=1 SV=2	2	1	1	1	0	1	0	1	0	1	0	1	0	1	0	1	0.7	0.7	0.7	112.59	1005	1005;1087	0.0051216	1.2757		By matching		By MS/MS	98.812	23078	18471	20991	13892	16845	14751	11055	24481	22180	229.71	21651	17415	21703
O43592	O43592	1	1	1	Exportin-T	XPOT	sp|O43592|XPOT_HUMAN Exportin-T OS=Homo sapiens GN=XPOT PE=1 SV=2	1	1	1	1	1	1	1	1	1	1	1	1	1	1	1	1	1.6	1.6	1.6	109.96	962	962	0	7.4399	By matching	By MS/MS	By matching	By MS/MS	0	6458.1	6951.4	8277	6702.4	7265.2	8546.4	6198.9	11452	6857.3	0	6087	6572.4	8387.8
O43593	O43593	1	1	1	Lysine-specific demethylase hairless	HR	sp|O43593|HAIR_HUMAN Lysine-specific demethylase hairless OS=Homo sapiens GN=HR PE=1 SV=5	1	1	1	1	0	0	0	1	0	0	0	1	0	0	0	1	0.6	0.6	0.6	127.49	1189	1189	0.0013812	1.698				By MS/MS	16.418	20543	17654	19199	26474	28332	26672	1019.2	1058.8	1096.7	146.91	19375	16825	20159
O43615	O43615	1	1	1	Mitochondrial import inner membrane translocase subunit TIM44	TIMM44	sp|O43615|TIM44_HUMAN Mitochondrial import inner membrane translocase subunit TIM44 OS=Homo sapiens GN=TIMM44 PE=1 SV=2	1	1	1	1	0	1	0	1	0	1	0	1	0	1	0	1	2.9	2.9	2.9	51.355	452	452	0	3.9289		By MS/MS		By MS/MS	0	7707	6991.5	7083.7	6369.2	6245.5	6770.4	4591.8	8560.9	6413.2	0	7235.6	6605.1	7333.3
O43663	O43663	1	1	1	Protein regulator of cytokinesis 1	PRC1	sp|O43663|PRC1_HUMAN Protein regulator of cytokinesis 1 OS=Homo sapiens GN=PRC1 PE=1 SV=2	1	1	1	1	0	1	1	1	0	1	1	1	0	1	1	1	1.1	1.1	1.1	71.606	620	620	0.0074442	1.1625		By matching	By matching	By MS/MS	0	29098	19929	22760	16739	18851	15257	10228	23443	18555	0	27269	18807	23836
O43681	O43681	1	1	1	ATPase ASNA1	ASNA1	sp|O43681|ASNA_HUMAN ATPase ASNA1 OS=Homo sapiens GN=ASNA1 PE=1 SV=2	1	1	1	1	0	1	0	1	0	1	0	1	0	1	0	1	2.6	2.6	2.6	38.792	348	348	0.0085679	1.1256		By MS/MS		By matching	0	2670.6	2651.3	3037.2	3186.6	3286.3	3393.1	2639.7	3292	2473.1	0	2517.8	2515.5	3115.8
O43795	O43795	9	9	8	Unconventional myosin-Ib	MYO1B	sp|O43795|MYO1B_HUMAN Unconventional myosin-Ib OS=Homo sapiens GN=MYO1B PE=1 SV=3	1	9	9	8	7	8	7	9	7	8	7	9	6	7	6	8	8.5	8.5	7.7	131.98	1136	1136	0	23.488	By MS/MS	By MS/MS	By MS/MS	By MS/MS	741.11	195420	176250	219930	262660	259550	231390	217180	266400	287780	1170.9	184370	167990	226350
O43808	O43808	1	1	1	Peroxisomal membrane protein PMP34	SLC25A17	sp|O43808|PM34_HUMAN Peroxisomal membrane protein PMP34 OS=Homo sapiens GN=SLC25A17 PE=1 SV=1	1	1	1	1	0	0	0	1	0	0	0	1	0	0	0	1	4.6	4.6	4.6	34.566	307	307	0.0027322	1.6254				By MS/MS	0	0	0	0	0	0	0	0	0	0	0	0	0	0
O60664	O60664	1	1	1	Perilipin-3	PLIN3	sp|O60664|PLIN3_HUMAN Perilipin-3 OS=Homo sapiens GN=PLIN3 PE=1 SV=3	1	1	1	1	1	0	0	0	1	0	0	0	1	0	0	0	3.7	3.7	3.7	47.074	434	434	0.0074627	1.1658	By MS/MS				0	0	0	0	0	0	0	0	0	0	0	0	0	0
O60762	O60762	2	2	2	Dolichol-phosphate mannosyltransferase subunit 1	DPM1	sp|O60762|DPM1_HUMAN Dolichol-phosphate mannosyltransferase subunit 1 OS=Homo sapiens GN=DPM1 PE=1 SV=1	1	2	2	2	1	2	0	2	1	2	0	2	1	2	0	2	7.7	7.7	7.7	29.634	260	260	0	2.3179	By matching	By MS/MS		By MS/MS	109.97	24944	24145	26360	21904	22106	22641	19144	35209	24541	119.99	23446	22816	26994
Q99879;Q99877;Q93079;Q5QNW6;P62807;P58876;O60814;Q99880;P57053;Q96A08	Q99879;Q99877;Q93079;Q5QNW6;P62807;P58876;O60814;Q99880;P57053	8;8;8;8;8;8;8;7;7;3	8;8;8;8;8;8;8;7;7;3	2;2;2;2;2;2;2;2;2;0	Histone H2B type 1-M;Histone H2B type 1-N;Histone H2B type 1-H;Histone H2B type 2-F;Histone H2B type 1-C/E/F/G/I;Histone H2B type 1-D;Histone H2B type 1-K;Histone H2B type 1-L;Histone H2B type F-S	HIST1H2BM;HIST1H2BN;HIST1H2BH;HIST2H2BF;HIST1H2BC;HIST1H2BD;HIST1H2BK;HIST1H2BL;H2BFS	sp|Q99879|H2B1M_HUMAN Histone H2B type 1-M OS=Homo sapiens GN=HIST1H2BM PE=1 SV=3;sp|Q99877|H2B1N_HUMAN Histone H2B type 1-N OS=Homo sapiens GN=HIST1H2BN PE=1 SV=3;sp|Q93079|H2B1H_HUMAN Histone H2B type 1-H OS=Homo sapiens GN=HIST1H2BH PE=1 SV=3;sp|Q5QNW6|	10	8	8	2	8	7	7	7	8	7	7	7	2	1	2	1	52.4	52.4	7.9	13.989	126	126;126;126;126;126;126;126;126;126;127	0	13.44	By MS/MS	By MS/MS	By MS/MS	By MS/MS	19078	201930	144940	169130	208780	315540	184500	158210	165740	192800	18844	190650	139320	180850
O60825	O60825	11	7	7	6-phosphofructo-2-kinase/fructose-2,6-bisphosphatase 2;6-phosphofructo-2-kinase;Fructose-2,6-bisphosphatase	PFKFB2	sp|O60825|F262_HUMAN 6-phosphofructo-2-kinase/fructose-2,6-bisphosphatase 2 OS=Homo sapiens GN=PFKFB2 PE=1 SV=2	1	11	7	7	2	10	4	9	1	6	2	5	1	6	2	5	24.6	17.4	17.4	58.476	505	505	0	18.714	By matching	By MS/MS	By matching	By MS/MS	152.68	71791	81625	90678	82063	95985	92287	68685	97703	66252	250.94	67774	77232	92408
O60884	O60884	6	6	6	DnaJ homolog subfamily A member 2	DNAJA2	sp|O60884|DNJA2_HUMAN DnaJ homolog subfamily A member 2 OS=Homo sapiens GN=DNAJA2 PE=1 SV=1	1	6	6	6	6	6	6	5	6	6	6	5	6	6	6	5	18.4	18.4	18.4	45.745	412	412	0	29.586	By matching	By MS/MS	By MS/MS	By MS/MS	284.53	120360	109820	126050	127940	118930	133340	92657	140010	130030	575.56	113210	104160	129510
O75122	O75122	10	10	10	CLIP-associating protein 2	CLASP2	sp|O75122|CLAP2_HUMAN CLIP-associating protein 2 OS=Homo sapiens GN=CLASP2 PE=1 SV=2	1	10	10	10	6	8	4	8	6	8	4	8	6	8	4	8	8.7	8.7	8.7	141.13	1294	1294	0	27.108	By MS/MS	By MS/MS	By MS/MS	By MS/MS	572.12	146890	149880	171780	131420	154390	141510	108190	172880	141470	1443.4	138300	141560	175080
O75143	O75143	4	4	4	Autophagy-related protein 13	ATG13	sp|O75143|ATG13_HUMAN Autophagy-related protein 13 OS=Homo sapiens GN=ATG13 PE=1 SV=1	1	4	4	4	0	4	0	4	0	4	0	4	0	4	0	4	9.1	9.1	9.1	56.571	517	517	0	7.8322		By MS/MS		By MS/MS	197.48	39532	38901	41080	44044	54332	44912	37173	56554	41258	228.28	37298	36884	42651
O75182	O75182	1	1	1	Paired amphipathic helix protein Sin3b	SIN3B	sp|O75182|SIN3B_HUMAN Paired amphipathic helix protein Sin3b OS=Homo sapiens GN=SIN3B PE=1 SV=2	1	1	1	1	1	1	1	1	1	1	1	1	1	1	1	1	0.6	0.6	0.6	133.06	1162	1162	0.0052016	1.3332	By MS/MS	By MS/MS	By MS/MS	By MS/MS	159.03	20233	16456	17300	27863	29964	26024	20553	36869	22168	217.8	19092	15737	18407
Q8WWF6;O75190	Q8WWF6;O75190	1;1	1;1	1;1	DnaJ homolog subfamily B member 3;DnaJ homolog subfamily B member 6	DNAJB3;DNAJB6	sp|Q8WWF6|DNJB3_HUMAN DnaJ homolog subfamily B member 3 OS=Homo sapiens GN=DNAJB3 PE=1 SV=1;sp|O75190|DNJB6_HUMAN DnaJ homolog subfamily B member 6 OS=Homo sapiens GN=DNAJB6 PE=1 SV=2	2	1	1	1	1	1	1	1	1	1	1	1	1	1	1	1	9	9	9	16.558	145	145;326	0	2.3999	By MS/MS	By matching	By matching	By MS/MS	171.17	20832	18008	21777	15931	20148	17042	18339	18432	23125	198.24	19592	17018	22368
O75306	O75306	2	2	2	NADH dehydrogenase [ubiquinone] iron-sulfur protein 2, mitochondrial	NDUFS2	sp|O75306|NDUS2_HUMAN NADH dehydrogenase [ubiquinone] iron-sulfur protein 2, mitochondrial OS=Homo sapiens GN=NDUFS2 PE=1 SV=2	1	2	2	2	0	2	0	2	0	2	0	2	0	2	0	2	4.5	4.5	4.5	52.545	463	463	0	4.1502		By matching		By MS/MS	0	11577	9890.1	10297	8001.8	8694.5	8160.8	6347.4	11280	9693.4	0	10862	9329.3	10676
O75352	O75352	1	1	1	Mannose-P-dolichol utilization defect 1 protein	MPDU1	sp|O75352|MPU1_HUMAN Mannose-P-dolichol utilization defect 1 protein OS=Homo sapiens GN=MPDU1 PE=1 SV=2	1	1	1	1	0	0	0	1	0	0	0	1	0	0	0	1	4	4	4	26.638	247	247	0.0027285	1.6251				By MS/MS	0	0	0	0	0	0	0	0	0	0	0	0	0	0
O75396	O75396	1	1	1	Vesicle-trafficking protein SEC22b	SEC22B	sp|O75396|SC22B_HUMAN Vesicle-trafficking protein SEC22b OS=Homo sapiens GN=SEC22B PE=1 SV=4	1	1	1	1	1	1	1	1	1	1	1	1	1	1	1	1	4.2	4.2	4.2	24.593	215	215	0	2.1001	By MS/MS	By MS/MS	By MS/MS	By MS/MS	127	34467	29352	32487	52859	41393	36976	32647	32308	41432	203.35	32462	28104	33914
O75400	O75400	3	3	3	Pre-mRNA-processing factor 40 homolog A	PRPF40A	sp|O75400|PR40A_HUMAN Pre-mRNA-processing factor 40 homolog A OS=Homo sapiens GN=PRPF40A PE=1 SV=2	1	3	3	3	0	3	0	2	0	3	0	2	0	3	0	2	2.7	2.7	2.7	108.8	957	957	0	3.394		By MS/MS		By MS/MS	0	27006	25187	27290	24062	30088	26982	22044	38245	25681	0	25424	23810	28224
O75489	O75489	3	3	3	NADH dehydrogenase [ubiquinone] iron-sulfur protein 3, mitochondrial	NDUFS3	sp|O75489|NDUS3_HUMAN NADH dehydrogenase [ubiquinone] iron-sulfur protein 3, mitochondrial OS=Homo sapiens GN=NDUFS3 PE=1 SV=1	1	3	3	3	1	2	1	3	1	2	1	3	1	2	1	3	15.2	15.2	15.2	30.241	264	264	0	13.195	By matching	By MS/MS	By matching	By MS/MS	0	56983	47142	50285	49621	55970	51547	38264	67026	48256	0	53563	44630	52532
O75494;Q8WXF0	O75494	7;2	7;2	7;2	Serine/arginine-rich splicing factor 10	SRSF10	sp|O75494|SRS10_HUMAN Serine/arginine-rich splicing factor 10 OS=Homo sapiens GN=SRSF10 PE=1 SV=1	2	7	7	7	1	6	1	7	1	6	1	7	1	6	1	7	22.9	22.9	22.9	31.3	262	262;261	0	61.227	By matching	By MS/MS	By matching	By MS/MS	0	142420	142150	139640	100600	113870	119830	98466	166260	113990	0	133730	133890	143640
O75533	O75533	32	32	32	Splicing factor 3B subunit 1	SF3B1	sp|O75533|SF3B1_HUMAN Splicing factor 3B subunit 1 OS=Homo sapiens GN=SF3B1 PE=1 SV=3	1	32	32	32	9	27	5	29	9	27	5	29	9	27	5	29	26.9	26.9	26.9	145.83	1304	1304	0	127.98	By matching	By MS/MS	By matching	By MS/MS	1729	531500	523170	557380	503740	578960	551210	388770	660340	515500	3364.1	500350	494650	574090
O75643	O75643	11	11	11	U5 small nuclear ribonucleoprotein 200 kDa helicase	SNRNP200	sp|O75643|U520_HUMAN U5 small nuclear ribonucleoprotein 200 kDa helicase OS=Homo sapiens GN=SNRNP200 PE=1 SV=2	1	11	11	11	6	11	3	10	6	11	3	10	6	11	3	10	6.5	6.5	6.5	244.5	2136	2136	0	42.179	By matching	By MS/MS	By matching	By MS/MS	662.29	129380	118940	130870	95529	104230	103070	85881	151220	115620	1009.4	121510	112240	134260
O75688;P35813	O75688	21;3	21;3	21;3	Protein phosphatase 1B	PPM1B	sp|O75688|PPM1B_HUMAN Protein phosphatase 1B OS=Homo sapiens GN=PPM1B PE=1 SV=1	2	21	21	21	17	20	18	20	17	20	18	20	17	20	18	20	53.2	53.2	53.2	52.642	479	479;382	0	231.94	By MS/MS	By MS/MS	By MS/MS	By MS/MS	2220	1072900	1039800	1146200	1319200	1249200	1194000	937880	1255300	1311600	5896.2	1010700	987680	1180700
O75821	O75821	1	1	1	Eukaryotic translation initiation factor 3 subunit G	EIF3G	sp|O75821|EIF3G_HUMAN Eukaryotic translation initiation factor 3 subunit G OS=Homo sapiens GN=EIF3G PE=1 SV=2	1	1	1	1	0	1	0	0	0	1	0	0	0	1	0	0	2.8	2.8	2.8	35.611	320	320	0	2.1023		By MS/MS			0	0	0	0	0	0	0	0	0	0	0	0	0	0
O75832	O75832	4	4	4	26S proteasome non-ATPase regulatory subunit 10	PSMD10	sp|O75832|PSD10_HUMAN 26S proteasome non-ATPase regulatory subunit 10 OS=Homo sapiens GN=PSMD10 PE=1 SV=1	1	4	4	4	3	3	1	4	3	3	1	4	3	3	1	4	15	15	15	24.428	226	226	0	3.9478	By MS/MS	By MS/MS	By MS/MS	By MS/MS	962.84	112750	95234	109280	82972	85681	87501	76192	96477	94158	1593.4	105830	89983	112410
O75844	O75844	1	1	1	CAAX prenyl protease 1 homolog	ZMPSTE24	sp|O75844|FACE1_HUMAN CAAX prenyl protease 1 homolog OS=Homo sapiens GN=ZMPSTE24 PE=1 SV=2	1	1	1	1	0	0	0	1	0	0	0	1	0	0	0	1	1.7	1.7	1.7	54.812	475	475	0.0074534	1.1627				By MS/MS	0	23512	20009	23723	20951	23695	20971	17821	34107	28489	0	22116	18941	24472
O75934	O75934	2	2	2	Pre-mRNA-splicing factor SPF27	BCAS2	sp|O75934|SPF27_HUMAN Pre-mRNA-splicing factor SPF27 OS=Homo sapiens GN=BCAS2 PE=1 SV=1	1	2	2	2	0	1	0	2	0	1	0	2	0	1	0	2	18.2	18.2	18.2	26.131	225	225	0	14.287		By MS/MS		By MS/MS	145.28	16070	14878	20123	11302	12384	14100	11055	18993	13843	195.29	15103	14034	20276
O75947	O75947	9	9	9	ATP synthase subunit d, mitochondrial	ATP5H	sp|O75947|ATP5H_HUMAN ATP synthase subunit d, mitochondrial OS=Homo sapiens GN=ATP5H PE=1 SV=3	1	9	9	9	7	9	9	7	7	9	9	7	7	9	9	7	62.1	62.1	62.1	18.491	161	161	0	33.649	By MS/MS	By MS/MS	By MS/MS	By MS/MS	1493.8	431730	424020	522270	446100	473740	504110	391460	445330	536620	3090	406720	401530	531390
O75964	O75964	2	2	2	ATP synthase subunit g, mitochondrial	ATP5L	sp|O75964|ATP5L_HUMAN ATP synthase subunit g, mitochondrial OS=Homo sapiens GN=ATP5L PE=1 SV=3	1	2	2	2	2	2	0	1	2	2	0	1	2	2	0	1	23.3	23.3	23.3	11.428	103	103	0	5.458	By matching	By MS/MS		By MS/MS	104.64	29755	28563	31611	24104	28081	26924	18860	36016	24378	152.3	27980	26965	32403
O94826	O94826	2	2	2	Mitochondrial import receptor subunit TOM70	TOMM70A	sp|O94826|TOM70_HUMAN Mitochondrial import receptor subunit TOM70 OS=Homo sapiens GN=TOMM70 PE=1 SV=1	1	2	2	2	0	1	2	2	0	1	2	2	0	1	2	2	3.1	3.1	3.1	67.454	608	608	0	4.021		By MS/MS	By matching	By MS/MS	176.85	28122	27795	33474	28077	31673	29668	24396	41759	33060	371.89	26497	26309	34126
O94832	O94832	2	2	2	Unconventional myosin-Id	MYO1D	sp|O94832|MYO1D_HUMAN Unconventional myosin-Id OS=Homo sapiens GN=MYO1D PE=1 SV=2	1	2	2	2	1	2	1	1	1	2	1	1	1	2	1	1	1.6	1.6	1.6	116.2	1006	1006	0	4.0486	By matching	By MS/MS	By matching	By matching	0	11226	12560	12881	21559	26738	24822	19357	28839	18336	0	10680	12007	13554
O95202	O95202	5	5	5	LETM1 and EF-hand domain-containing protein 1, mitochondrial	LETM1	sp|O95202|LETM1_HUMAN Mitochondrial proton/calcium exchanger protein OS=Homo sapiens GN=LETM1 PE=1 SV=1	1	5	5	5	2	3	2	3	2	3	2	3	2	3	2	3	7.3	7.3	7.3	83.353	739	739	0	10.116	By matching	By MS/MS	By MS/MS	By MS/MS	48.361	44568	37411	42182	58282	40285	41621	29326	49090	46209	149.32	41878	35686	43658
O95232	O95232	4	4	4	Luc7-like protein 3	LUC7L3	sp|O95232|LC7L3_HUMAN Luc7-like protein 3 OS=Homo sapiens GN=LUC7L3 PE=1 SV=2	1	4	4	4	1	3	0	3	1	3	0	3	1	3	0	3	7.2	7.2	7.2	51.466	432	432	0	5.2103	By matching	By MS/MS		By MS/MS	159.92	32398	34581	39516	31774	39097	32465	29718	44820	35967	309.21	30548	32684	40275
O95292	O95292	2	2	2	Vesicle-associated membrane protein-associated protein B/C	VAPB	sp|O95292|VAPB_HUMAN Vesicle-associated membrane protein-associated protein B/C OS=Homo sapiens GN=VAPB PE=1 SV=3	1	2	2	2	1	2	1	1	1	2	1	1	1	2	1	1	8.2	8.2	8.2	27.228	243	243	0	4.5581	By matching	By MS/MS	By matching	By matching	0	5376.8	9920.5	11255	9530.7	10897	10437	7076.4	10961	6482.2	0	5120.3	9379	11193
O95373	O95373	6	5	5	Importin-7	IPO7	sp|O95373|IPO7_HUMAN Importin-7 OS=Homo sapiens GN=IPO7 PE=1 SV=1	1	6	5	5	4	5	5	6	3	4	4	5	3	4	4	5	6.2	5.2	5.2	119.52	1038	1038	0	14.666	By MS/MS	By MS/MS	By MS/MS	By MS/MS	367.78	92226	80140	97451	136790	102790	97560	78953	89906	111200	595.02	86842	76629	100360
O95399	O95399	1	1	1	Urotensin-2	UTS2	sp|O95399|UTS2_HUMAN Urotensin-2 OS=Homo sapiens GN=UTS2 PE=1 SV=1	1	1	1	1	0	0	1	1	0	0	1	1	0	0	1	1	6.5	6.5	6.5	14.295	124	124	0.0040706	1.5888			By MS/MS	By MS/MS	0	19451	12751	13871	16273	15298	18573	11172	17091	18911	0	18243	12112	14750
O95721	O95721	3	3	3	Synaptosomal-associated protein 29	SNAP29	sp|O95721|SNP29_HUMAN Synaptosomal-associated protein 29 OS=Homo sapiens GN=SNAP29 PE=1 SV=1	1	3	3	3	3	2	1	1	3	2	1	1	3	2	1	1	11.6	11.6	11.6	28.97	258	258	0	8.5117	By MS/MS	By MS/MS	By matching	By matching	214	16169	22017	24312	16801	22708	19979	18268	20945	15356	346.22	15287	20769	24477
O95785	O95785	1	1	1	Protein Wiz	WIZ	sp|O95785|WIZ_HUMAN Protein Wiz OS=Homo sapiens GN=WIZ PE=1 SV=2	1	1	1	1	0	1	0	1	0	1	0	1	0	1	0	1	1.1	1.1	1.1	178.67	1651	1651	0	18.535		By MS/MS		By MS/MS	144.67	21753	22684	26606	23531	25842	25343	18311	31465	23771	229.67	20508	21480	27100
O95816	O95816	5	5	5	BAG family molecular chaperone regulator 2	BAG2	sp|O95816|BAG2_HUMAN BAG family molecular chaperone regulator 2 OS=Homo sapiens GN=BAG2 PE=1 SV=1	1	5	5	5	5	3	3	2	5	3	3	2	5	3	3	2	24.2	24.2	24.2	23.772	211	211	0	23.687	By MS/MS	By MS/MS	By MS/MS	By MS/MS	313.59	105680	93342	104610	83428	93321	93640	74179	91696	106970	580.65	99301	88182	107750
O95831	O95831	4	4	4	Apoptosis-inducing factor 1, mitochondrial	AIFM1	sp|O95831|AIFM1_HUMAN Apoptosis-inducing factor 1, mitochondrial OS=Homo sapiens GN=AIFM1 PE=1 SV=1	1	4	4	4	2	4	3	4	2	4	3	4	2	4	3	4	8.3	8.3	8.3	66.9	613	613	0	7.5763	By MS/MS	By MS/MS	By matching	By MS/MS	171.25	37190	34975	40118	30979	31775	31716	23594	41076	34606	254.39	34950	33042	40978
O96000	O96000	1	1	1	NADH dehydrogenase [ubiquinone] 1 beta subcomplex subunit 10	NDUFB10	sp|O96000|NDUBA_HUMAN NADH dehydrogenase [ubiquinone] 1 beta subcomplex subunit 10 OS=Homo sapiens GN=NDUFB10 PE=1 SV=3	1	1	1	1	1	1	1	1	1	1	1	1	1	1	1	1	8.1	8.1	8.1	20.776	172	172	0	3.572	By matching	By MS/MS	By matching	By matching	0	5312.9	4890.3	6037.7	5910.8	7022.8	8636.8	4927.6	7964	4094.7	0	5012.5	4640.3	6207.6
O96008	O96008	1	1	1	Mitochondrial import receptor subunit TOM40 homolog	TOMM40	sp|O96008|TOM40_HUMAN Mitochondrial import receptor subunit TOM40 homolog OS=Homo sapiens GN=TOMM40 PE=1 SV=1	1	1	1	1	0	1	0	1	0	1	0	1	0	1	0	1	3	3	3	37.893	361	361	0.0051546	1.2904		By MS/MS		By matching	0	5510.5	6349.1	7551	8156.8	8927.8	10040	6923.5	9525.7	5947.5	0	5216	6031.4	7687.3
P00167	P00167	4	4	4	Cytochrome b5	CYB5A	sp|P00167|CYB5_HUMAN Cytochrome b5 OS=Homo sapiens GN=CYB5A PE=1 SV=2	1	4	4	4	4	4	3	3	4	4	3	3	4	4	3	3	33.6	33.6	33.6	15.33	134	134	0	12.447	By MS/MS	By MS/MS	By MS/MS	By matching	152.62	45257	38678	48906	71142	56278	55562	48551	40839	74539	164.54	42662	37053	50423
P00338;Q6ZMR3;P07864	P00338	4;1;1	4;1;1	3;0;0	L-lactate dehydrogenase A chain	LDHA	sp|P00338|LDHA_HUMAN L-lactate dehydrogenase A chain OS=Homo sapiens GN=LDHA PE=1 SV=2	3	4	4	3	2	2	1	2	2	2	1	2	1	2	1	1	11.7	11.7	8.1	36.688	332	332;332;332	0	39.803	By MS/MS	By MS/MS	By matching	By MS/MS	284.64	94910	57153	59672	49090	54998	58497	42644	70311	58073	452.42	88839	53972	63957
P00387	P00387	3	3	3	NADH-cytochrome b5 reductase 3;NADH-cytochrome b5 reductase 3 membrane-bound form;NADH-cytochrome b5 reductase 3 soluble form	CYB5R3	sp|P00387|NB5R3_HUMAN NADH-cytochrome b5 reductase 3 OS=Homo sapiens GN=CYB5R3 PE=1 SV=3	1	3	3	3	2	3	2	3	2	3	2	3	2	3	2	3	15.6	15.6	15.6	34.234	301	301	0	17.311	By matching	By MS/MS	By matching	By MS/MS	279.21	38489	37613	42514	40975	45507	41700	30702	58085	44727	415.15	36268	35647	43680
P00403	P00403	2	2	2	Cytochrome c oxidase subunit 2	MT-CO2	sp|P00403|COX2_HUMAN Cytochrome c oxidase subunit 2 OS=Homo sapiens GN=MT-CO2 PE=1 SV=1	1	2	2	2	0	2	0	1	0	2	0	1	0	2	0	1	7.5	7.5	7.5	25.565	227	227	0	2.2318		By MS/MS		By MS/MS	190.15	30769	25727	27893	24167	31955	27061	21164	31350	21552	229.88	28938	24328	29104
P00846	P00846	2	2	2	ATP synthase subunit a	MT-ATP6	sp|P00846|ATP6_HUMAN ATP synthase subunit a OS=Homo sapiens GN=MT-ATP6 PE=1 SV=1	1	2	2	2	1	2	1	2	1	2	1	2	1	2	1	2	8.4	8.4	8.4	24.817	226	226	0	2.4031	By MS/MS	By MS/MS	By matching	By MS/MS	0	24861	18135	12537	19397	17537	16708	14940	23955	17267	0	23282	17173	13946
P01859	P01859	1	1	1	Ig gamma-2 chain C region	IGHG2	sp|P01859|IGHG2_HUMAN Immunoglobulin heavy constant gamma 2 OS=Homo sapiens GN=IGHG2 PE=1 SV=2	1	1	1	1	1	1	1	1	1	1	1	1	1	1	1	1	2.8	2.8	2.8	35.9	326	326	0	20.821	By MS/MS	By MS/MS	By matching	By MS/MS	71.159	77059	59203	69373	76243	122200	82739	91452	105930	122860	374.58	72786	56246	73577
P02786	P02786	6	6	6	Transferrin receptor protein 1;Transferrin receptor protein 1, serum form	TFRC	sp|P02786|TFR1_HUMAN Transferrin receptor protein 1 OS=Homo sapiens GN=TFRC PE=1 SV=2	1	6	6	6	4	6	4	6	4	6	4	6	4	6	4	6	8.9	8.9	8.9	84.87	760	760	0	16.708	By MS/MS	By MS/MS	By MS/MS	By MS/MS	448.29	93067	83650	97384	83433	88855	84750	69842	93565	89252	785.24	87520	79158	99986
P02788	P02788	3	1	1	Lactotransferrin;Lactoferricin-H;Kaliocin-1;Lactoferroxin-A;Lactoferroxin-B;Lactoferroxin-C	LTF	sp|P02788|TRFL_HUMAN Lactotransferrin OS=Homo sapiens GN=LTF PE=1 SV=6	1	3	1	1	0	0	0	3	0	0	0	1	0	0	0	1	4.2	1.3	1.3	78.181	710	710	0	2.2818				By MS/MS	0	0	0	0	0	0	0	0	0	0	0	0	0	0
P04075	P04075	3	3	3	Fructose-bisphosphate aldolase A	ALDOA	sp|P04075|ALDOA_HUMAN Fructose-bisphosphate aldolase A OS=Homo sapiens GN=ALDOA PE=1 SV=2	1	3	3	3	1	0	1	2	1	0	1	2	1	0	1	2	9.3	9.3	9.3	39.42	364	364	0	2.335	By MS/MS		By matching	By MS/MS	324.51	42379	26194	33314	25977	31030	28191	24904	33651	35930	445.76	39741	24798	34966
P04181	P04181	5	5	5	Ornithine aminotransferase, mitochondrial;Ornithine aminotransferase, hepatic form;Ornithine aminotransferase, renal form	OAT	sp|P04181|OAT_HUMAN Ornithine aminotransferase, mitochondrial OS=Homo sapiens GN=OAT PE=1 SV=1	1	5	5	5	1	4	2	3	1	4	2	3	1	4	2	3	14.6	14.6	14.6	48.534	439	439	0	14.875	By matching	By MS/MS	By matching	By MS/MS	0	38430	38704	42727	33199	35918	36111	25432	53512	27925	0	36143	36536	43616
P04259	P04259	26	1	1	Keratin, type II cytoskeletal 6B	KRT6B	sp|P04259|K2C6B_HUMAN Keratin, type II cytoskeletal 6B OS=Homo sapiens GN=KRT6B PE=1 SV=5	1	26	1	1	23	24	16	26	1	0	1	1	1	0	1	1	41	1.6	1.6	60.066	564	564	0.0040161	1.5094	By matching	By matching	By matching	By MS/MS	0	21489	16581	17540	22645	27549	25300	13649	28215	27443	0	20242	15770	18654
P04406	P04406	4	4	4	Glyceraldehyde-3-phosphate dehydrogenase	GAPDH	sp|P04406|G3P_HUMAN Glyceraldehyde-3-phosphate dehydrogenase OS=Homo sapiens GN=GAPDH PE=1 SV=3	1	4	4	4	3	3	3	3	3	3	3	3	3	3	3	3	13.1	13.1	13.1	36.053	335	335	0	7.3601	By MS/MS	By MS/MS	By MS/MS	By MS/MS	1549.4	170100	123740	126170	110330	116980	132270	88527	104500	103260	1982	159430	116980	133090
P04843	P04843	18	18	18	Dolichyl-diphosphooligosaccharide--protein glycosyltransferase subunit 1	RPN1	sp|P04843|RPN1_HUMAN Dolichyl-diphosphooligosaccharide--protein glycosyltransferase subunit 1 OS=Homo sapiens GN=RPN1 PE=1 SV=1	1	18	18	18	14	17	13	17	14	17	13	17	14	17	13	17	30.1	30.1	30.1	68.569	607	607	0	70.699	By MS/MS	By MS/MS	By MS/MS	By MS/MS	1587.8	548710	499300	569590	631980	622580	587680	481830	683190	650040	2775.8	516720	474290	587890
P04844	P04844	4	4	4	Dolichyl-diphosphooligosaccharide--protein glycosyltransferase subunit 2	RPN2	sp|P04844|RPN2_HUMAN Dolichyl-diphosphooligosaccharide--protein glycosyltransferase subunit 2 OS=Homo sapiens GN=RPN2 PE=1 SV=3	1	4	4	4	3	4	4	3	3	4	4	3	3	4	4	3	7.1	7.1	7.1	69.283	631	631	0	9.7793	By MS/MS	By MS/MS	By matching	By MS/MS	433	39565	40681	44586	37609	43359	40800	32958	45985	34961	581.42	37260	38470	45634
Q99878;Q96KK5;Q9BTM1;Q16777;Q93077;Q7L7L0;Q6FI13;P20671;P0C0S8;P04908;Q71UI9;P0C0S5;Q96QV6;P16104;Q8IUE6	Q99878;Q96KK5;Q9BTM1;Q16777;Q93077;Q7L7L0;Q6FI13;P20671;P0C0S8;P04908;Q71UI9;P0C0S5;Q96QV6;P16104	3;3;3;3;3;3;3;3;3;3;2;2;2;2;1	3;3;3;3;3;3;3;3;3;3;2;2;2;2;1	3;3;3;3;3;3;3;3;3;3;2;2;2;2;1	Histone H2A type 1-J;Histone H2A type 1-H;Histone H2A.J;Histone H2A type 2-C;Histone H2A type 1-C;Histone H2A type 3;Histone H2A type 2-A;Histone H2A type 1-D;Histone H2A type 1;Histone H2A type 1-B/E;Histone H2A.V;Histone H2A.Z;Histone H2A type 1-A;Histone H2AX	HIST1H2AJ;HIST1H2AH;H2AFJ;HIST2H2AC;HIST1H2AC;HIST3H2A;HIST2H2AA3;HIST1H2AD;HIST1H2AG;HIST1H2AB;H2AFV;H2AFZ;HIST1H2AA;H2AFX	sp|Q99878|H2A1J_HUMAN Histone H2A type 1-J OS=Homo sapiens GN=HIST1H2AJ PE=1 SV=3;sp|Q96KK5|H2A1H_HUMAN Histone H2A type 1-H OS=Homo sapiens GN=HIST1H2AH PE=1 SV=3;sp|Q9BTM1|H2AJ_HUMAN Histone H2A.J OS=Homo sapiens GN=H2AFJ PE=1 SV=1;sp|Q16777|H2A2C_HUMAN	15	3	3	3	3	2	2	3	3	2	2	3	3	2	2	3	27.3	27.3	27.3	13.936	128	128;128;129;129;130;130;130;130;130;130;128;128;131;143;130	0	12.546	By MS/MS	By MS/MS	By MS/MS	By MS/MS	8856.3	81226	68835	92153	82066	99344	86290	58409	84462	74197	8759.3	76573	65911	94544
P05023;P13637;P50993;Q13733;P20648	P05023;P13637	26;13;12;8;4	26;13;12;8;4	22;9;8;4;1	Sodium/potassium-transporting ATPase subunit alpha-1;Sodium/potassium-transporting ATPase subunit alpha-3	ATP1A1;ATP1A3	sp|P05023|AT1A1_HUMAN Sodium/potassium-transporting ATPase subunit alpha-1 OS=Homo sapiens GN=ATP1A1 PE=1 SV=1;sp|P13637|AT1A3_HUMAN Sodium/potassium-transporting ATPase subunit alpha-3 OS=Homo sapiens GN=ATP1A3 PE=1 SV=3	5	26	26	22	19	25	19	26	19	25	19	26	17	22	16	22	29.1	29.1	25.4	112.89	1023	1023;1013;1020;1029;1035	0	146.05	By MS/MS	By MS/MS	By MS/MS	By MS/MS	2904.2	602630	522660	635590	730590	661570	629990	517780	665140	693790	4261.5	567370	497540	654440
P05141;Q9H0C2	P05141	15;3	5;0	5;0	ADP/ATP translocase 2;ADP/ATP translocase 2, N-terminally processed	SLC25A5	sp|P05141|ADT2_HUMAN ADP/ATP translocase 2 OS=Homo sapiens GN=SLC25A5 PE=1 SV=7	2	15	5	5	11	14	14	15	5	4	5	5	5	4	5	5	45.3	19.5	19.5	32.852	298	298;315	0	51.082	By MS/MS	By MS/MS	By MS/MS	By MS/MS	1321.7	372340	357460	366960	478120	408380	428710	332410	447230	650370	2745.2	350450	339930	380280
P05386	P05386	2	2	2	60S acidic ribosomal protein P1	RPLP1	sp|P05386|RLA1_HUMAN 60S acidic ribosomal protein P1 OS=Homo sapiens GN=RPLP1 PE=1 SV=1	1	2	2	2	2	2	2	2	2	2	2	2	2	2	2	2	51.8	51.8	51.8	11.514	114	114	0	61.872	By MS/MS	By MS/MS	By MS/MS	By MS/MS	617.27	185190	187520	206750	187830	169860	197760	129520	218180	175520	1321.1	174140	177440	210900
P05387	P05387	5	5	5	60S acidic ribosomal protein P2	RPLP2	sp|P05387|RLA2_HUMAN 60S acidic ribosomal protein P2 OS=Homo sapiens GN=RPLP2 PE=1 SV=1	1	5	5	5	4	5	5	5	4	5	5	5	4	5	5	5	76.5	76.5	76.5	11.665	115	115	0	114	By MS/MS	By MS/MS	By MS/MS	By MS/MS	1505.4	376140	387050	427770	396560	364620	401010	257450	378990	371600	3206.2	353890	366380	436200
P05388;Q8NHW5	P05388;Q8NHW5	9;5	9;5	9;5	60S acidic ribosomal protein P0;60S acidic ribosomal protein P0-like	RPLP0;RPLP0P6	sp|P05388|RLA0_HUMAN 60S acidic ribosomal protein P0 OS=Homo sapiens GN=RPLP0 PE=1 SV=1;sp|Q8NHW5|RLA0L_HUMAN 60S acidic ribosomal protein P0-like OS=Homo sapiens GN=RPLP0P6 PE=5 SV=1	2	9	9	9	3	8	2	8	3	8	2	8	3	8	2	8	41.6	41.6	41.6	34.273	317	317;317	0	99.028	By matching	By MS/MS	By MS/MS	By MS/MS	1217.6	289300	289050	310450	186500	201140	201350	137920	238210	195460	2587.8	271520	272080	316010
P05455	P05455	2	2	2	Lupus La protein	SSB	sp|P05455|LA_HUMAN Lupus La protein OS=Homo sapiens GN=SSB PE=1 SV=2	1	2	2	2	0	1	0	2	0	1	0	2	0	1	0	2	6.6	6.6	6.6	46.836	408	408	0	7.0882		By MS/MS		By MS/MS	0	5434.1	9349.7	9811.1	8532	10200	7638.1	5707.1	9475.4	4838.7	0	5162.9	8833.1	9828.5
P05496;Q06055;P48201	P05496;Q06055;P48201	1;1;1	1;1;1	1;1;1	ATP synthase F(0) complex subunit C1, mitochondrial;ATP synthase F(0) complex subunit C2, mitochondrial;ATP synthase F(0) complex subunit C3, mitochondrial	ATP5G1;ATP5G2;ATP5G3	sp|P05496|AT5G1_HUMAN ATP synthase F(0) complex subunit C1, mitochondrial OS=Homo sapiens GN=ATP5G1 PE=1 SV=2;sp|Q06055|AT5G2_HUMAN ATP synthase F(0) complex subunit C2, mitochondrial OS=Homo sapiens GN=ATP5G2 PE=2 SV=1;sp|P48201|AT5G3_HUMAN ATP synthase F	3	1	1	1	1	1	1	1	1	1	1	1	1	1	1	1	5.1	5.1	5.1	14.277	136	136;141;142	0.0013755	1.6562	By matching	By MS/MS	By matching	By MS/MS	0	21050	38269	32403	45736	75067	30734	47164	61747	27693	194.19	20244	36306	33797
P06454	P06454	2	2	2	Prothymosin alpha;Prothymosin alpha, N-terminally processed;Thymosin alpha-1	PTMA	sp|P06454|PTMA_HUMAN Prothymosin alpha OS=Homo sapiens GN=PTMA PE=1 SV=2	1	2	2	2	2	1	2	2	2	1	2	2	2	1	2	2	21.6	21.6	21.6	12.203	111	111	0	24.205	By MS/MS	By MS/MS	By MS/MS	By MS/MS	720.17	115430	57916	67049	58464	69358	85406	44819	49591	55983	889.59	108050	54844	72689
P06493;P24941;Q00526;Q00535;P11802;Q00534;P50750;Q96Q40;O94921;Q07002;Q00536;Q00537;Q9NYV4;Q14004	P06493;P24941;Q00526	4;2;2;1;1;1;1;1;1;1;1;1;1;1	4;2;2;1;1;1;1;1;1;1;1;1;1;1	4;2;2;1;1;1;1;1;1;1;1;1;1;1	Cyclin-dependent kinase 1;Cyclin-dependent kinase 2;Cyclin-dependent kinase 3	CDK1;CDK2;CDK3	sp|P06493|CDK1_HUMAN Cyclin-dependent kinase 1 OS=Homo sapiens GN=CDK1 PE=1 SV=3;sp|P24941|CDK2_HUMAN Cyclin-dependent kinase 2 OS=Homo sapiens GN=CDK2 PE=1 SV=2;sp|Q00526|CDK3_HUMAN Cyclin-dependent kinase 3 OS=Homo sapiens GN=CDK3 PE=1 SV=1	14	4	4	4	3	3	1	3	3	3	1	3	3	3	1	3	14.5	14.5	14.5	34.095	297	297;298;305;292;303;326;372;435;469;472;496;523;1490;1512	0	7.6439	By matching	By MS/MS	By MS/MS	By MS/MS	557.02	75101	65150	71854	69229	60381	62643	45319	69567	61191	860.52	70515	61726	74088
P06576	P06576	24	24	24	ATP synthase subunit beta, mitochondrial	ATP5B	sp|P06576|ATPB_HUMAN ATP synthase subunit beta, mitochondrial OS=Homo sapiens GN=ATP5B PE=1 SV=3	1	24	24	24	22	22	21	19	22	22	21	19	22	22	21	19	59.7	59.7	59.7	56.559	529	529	0	188.65	By MS/MS	By MS/MS	By MS/MS	By MS/MS	4319.9	1072700	857660	970890	1100300	1031400	1063700	840680	999380	1176100	6565.9	1008300	815020	1011000
P06733;P13929;P09104	P06733	9;1;1	9;1;1	9;1;1	Alpha-enolase	ENO1	sp|P06733|ENOA_HUMAN Alpha-enolase OS=Homo sapiens GN=ENO1 PE=1 SV=2	3	9	9	9	7	7	6	8	7	7	6	8	7	7	6	8	24.7	24.7	24.7	47.168	434	434;434;434	0	38.003	By MS/MS	By MS/MS	By MS/MS	By MS/MS	1125.6	274340	162560	181240	120000	137360	162240	109020	117440	137400	1772.7	256660	153260	192460
P06748	P06748	11	11	11	Nucleophosmin	NPM1	sp|P06748|NPM_HUMAN Nucleophosmin OS=Homo sapiens GN=NPM1 PE=1 SV=2	1	11	11	11	8	10	10	10	8	10	10	10	8	10	10	10	33.7	33.7	33.7	32.575	294	294	0	44.064	By MS/MS	By MS/MS	By MS/MS	By MS/MS	1051.6	324800	254310	298990	242570	290320	256150	222910	241030	271040	2268.7	305140	240480	310210
Q16778;P33778;P23527;P06899;Q8N257;Q6DRA6;Q6DN03	Q16778;P33778;P23527;P06899;Q8N257	7;7;7;7;5;3;3	1;1;1;1;1;1;1	1;1;1;1;1;1;1	Histone H2B type 2-E;Histone H2B type 1-B;Histone H2B type 1-O;Histone H2B type 1-J;Histone H2B type 3-B	HIST2H2BE;HIST1H2BB;HIST1H2BO;HIST1H2BJ;HIST3H2BB	sp|Q16778|H2B2E_HUMAN Histone H2B type 2-E OS=Homo sapiens GN=HIST2H2BE PE=1 SV=3;sp|P33778|H2B1B_HUMAN Histone H2B type 1-B OS=Homo sapiens GN=HIST1H2BB PE=1 SV=2;sp|P23527|H2B1O_HUMAN Histone H2B type 1-O OS=Homo sapiens GN=HIST1H2BO PE=1 SV=3;sp|P06899|	7	7	1	1	7	6	6	7	1	0	1	1	1	0	1	1	52.4	7.9	7.9	13.92	126	126;126;126;126;126;164;193	0	2.1933	By MS/MS	By matching	By MS/MS	By matching	99.873	20812	14597	24768	39474	37953	28165	21022	17742	32277	156.35	19718	14164	25642
P07195	P07195	4	3	3	L-lactate dehydrogenase B chain	LDHB	sp|P07195|LDHB_HUMAN L-lactate dehydrogenase B chain OS=Homo sapiens GN=LDHB PE=1 SV=2	1	4	3	3	4	1	3	3	3	1	3	2	3	1	3	2	11.4	7.8	7.8	36.638	334	334	0	7.5854	By MS/MS	By MS/MS	By MS/MS	By MS/MS	637.98	142460	54700	66675	39056	48998	56682	39408	39581	51266	983.53	133020	51570	73698
P07437;A6NNZ2;CON__ENSEMBL:ENSBTAP00000025008;Q9H4B7	P07437	22;8;5;5	5;0;0;0	4;0;0;0	Tubulin beta chain	TUBB	sp|P07437|TBB5_HUMAN Tubulin beta chain OS=Homo sapiens GN=TUBB PE=1 SV=2	4	22	5	4	17	22	19	18	3	5	4	5	2	4	3	4	50	13.5	10.1	49.67	444	444;444;536;451	0	68.411	By MS/MS	By MS/MS	By MS/MS	By MS/MS	2063.9	375010	373980	424910	427390	398900	432990	326990	492990	454580	3890.8	353080	354660	434380
P07602	P07602	1	1	1	Prosaposin;Saposin-A;Saposin-B-Val;Saposin-B;Saposin-C;Saposin-D	PSAP	sp|P07602|SAP_HUMAN Prosaposin OS=Homo sapiens GN=PSAP PE=1 SV=2	1	1	1	1	0	0	0	1	0	0	0	1	0	0	0	1	2.9	2.9	2.9	58.112	524	524	0	6.829				By MS/MS	0	0	0	0	0	0	0	0	0	0	0	0	0	0
P07737	P07737	2	2	2	Profilin-1	PFN1	sp|P07737|PROF1_HUMAN Profilin-1 OS=Homo sapiens GN=PFN1 PE=1 SV=2	1	2	2	2	2	1	0	1	2	1	0	1	2	1	0	1	21.4	21.4	21.4	15.054	140	140	0	5.0968	By MS/MS	By matching		By MS/MS	231.01	61974	25329	31051	16642	24304	27887	20705	15581	29974	281.92	57894	23855	34053
P07814	P07814	3	3	3	Bifunctional glutamate/proline--tRNA ligase;Glutamate--tRNA ligase;Proline--tRNA ligase	EPRS	sp|P07814|SYEP_HUMAN Bifunctional glutamate/proline--tRNA ligase OS=Homo sapiens GN=EPRS PE=1 SV=5	1	3	3	3	1	2	2	3	1	2	2	3	1	2	2	3	1.9	1.9	1.9	170.59	1512	1512	0	3.8895	By MS/MS	By MS/MS	By MS/MS	By MS/MS	293.11	73300	52843	59955	67853	55241	59813	44700	56396	64754	514.79	68758	50218	62702
P07900;Q14568	P07900;Q14568	8;4	3;1	3;1	Heat shock protein HSP 90-alpha;Heat shock protein HSP 90-alpha A2	HSP90AA1;HSP90AA2P	sp|P07900|HS90A_HUMAN Heat shock protein HSP 90-alpha OS=Homo sapiens GN=HSP90AA1 PE=1 SV=5;sp|Q14568|HS902_HUMAN Heat shock protein HSP 90-alpha A2 OS=Homo sapiens GN=HSP90AA2P PE=1 SV=2	2	8	3	3	8	7	4	6	3	2	1	1	3	2	1	1	11.5	4	4	84.659	732	732;343	0	7.6634	By MS/MS	By matching	By matching	By matching	154.06	53888	14044	19082	12241	14648	18598	13474	8005	16908	217.36	50262	13271	22036
P07910;P0DMR1;O60812;B7ZW38;B2RXH8;Q86SE5	P07910;P0DMR1;O60812;B7ZW38;B2RXH8	15;8;8;8;8;1	15;8;8;8;8;1	15;8;8;8;8;1	Heterogeneous nuclear ribonucleoproteins C1/C2;Heterogeneous nuclear ribonucleoprotein C-like 4;Heterogeneous nuclear ribonucleoprotein C-like 1;Heterogeneous nuclear ribonucleoprotein C-like 3;Heterogeneous nuclear ribonucleoprotein C-like 2	HNRNPC;HNRNPCL4;HNRNPCL1;HNRNPCL3;HNRNPCL2	sp|P07910|HNRPC_HUMAN Heterogeneous nuclear ribonucleoproteins C1/C2 OS=Homo sapiens GN=HNRNPC PE=1 SV=4;sp|P0DMR1|HNRC4_HUMAN Heterogeneous nuclear ribonucleoprotein C-like 4 OS=Homo sapiens GN=HNRNPCL4 PE=3 SV=1;sp|O60812|HNRC1_HUMAN Heterogeneous nuclea	6	15	15	15	10	13	11	14	10	13	11	14	10	13	11	14	41.2	41.2	41.2	33.67	306	306;293;293;293;293;291	0	110.04	By MS/MS	By MS/MS	By MS/MS	By MS/MS	2121.5	619890	541680	559400	542610	582520	548010	480140	655980	563010	3758.1	582530	512570	582310
P07919;A0A096LP55	P07919;A0A096LP55	2;1	2;1	2;1	Cytochrome b-c1 complex subunit 6, mitochondrial;Cytochrome b-c1 complex subunit 6	UQCRH;UQCRHL	sp|P07919|QCR6_HUMAN Cytochrome b-c1 complex subunit 6, mitochondrial OS=Homo sapiens GN=UQCRH PE=1 SV=2;sp|A0A096LP55|QCR6L_HUMAN Cytochrome b-c1 complex subunit 6-like, mitochondrial OS=Homo sapiens GN=UQCRHL PE=3 SV=1	2	2	2	2	2	2	2	2	2	2	2	2	2	2	2	2	18.7	18.7	18.7	10.739	91	91;91	0	4.8806	By MS/MS	By MS/MS	By MS/MS	By MS/MS	156.33	62772	62819	72720	75447	88150	88932	67140	84334	82246	417.46	59267	59613	74777
P08195	P08195	7	7	7	4F2 cell-surface antigen heavy chain	SLC3A2	sp|P08195|4F2_HUMAN 4F2 cell-surface antigen heavy chain OS=Homo sapiens GN=SLC3A2 PE=1 SV=3	1	7	7	7	6	7	5	6	6	7	5	6	6	7	5	6	14.8	14.8	14.8	67.993	630	630	0	56.385	By MS/MS	By MS/MS	By MS/MS	By MS/MS	662.11	196310	169770	187560	218600	197730	196010	150310	218470	262600	1003.9	184620	161320	194490
P08237;P17858;Q01813	P08237;P17858;Q01813	1;1;1	1;1;1	1;1;1	ATP-dependent 6-phosphofructokinase, muscle type;ATP-dependent 6-phosphofructokinase, liver type;ATP-dependent 6-phosphofructokinase, platelet type	PFKM;PFKL;PFKP	sp|P08237|PFKAM_HUMAN ATP-dependent 6-phosphofructokinase, muscle type OS=Homo sapiens GN=PFKM PE=1 SV=2;sp|P17858|PFKAL_HUMAN ATP-dependent 6-phosphofructokinase, liver type OS=Homo sapiens GN=PFKL PE=1 SV=6;sp|Q01813|PFKAP_HUMAN ATP-dependent 6-phosphofr	3	1	1	1	1	1	0	1	1	1	0	1	1	1	0	1	1.2	1.2	1.2	85.182	780	780;780;784	0	2.0302	By matching	By MS/MS		By MS/MS	0	23526	17025	17987	18161	20894	17530	15011	26329	19360	0	22087	16121	19036
P08238;Q58FF8;Q58FF7;Q58FG0	P08238	19;6;5;1	19;6;5;1	12;3;5;0	Heat shock protein HSP 90-beta	HSP90AB1	sp|P08238|HS90B_HUMAN Heat shock protein HSP 90-beta OS=Homo sapiens GN=HSP90AB1 PE=1 SV=4	4	19	19	12	15	19	12	19	15	19	12	19	9	12	9	12	23.5	23.5	14	83.263	724	724;381;597;334	0	147	By MS/MS	By MS/MS	By MS/MS	By MS/MS	8531.7	860970	590730	653810	622240	666010	764800	483240	729610	678160	11337	807560	559840	689830
P08621	P08621	9	9	9	U1 small nuclear ribonucleoprotein 70 kDa	SNRNP70	sp|P08621|RU17_HUMAN U1 small nuclear ribonucleoprotein 70 kDa OS=Homo sapiens GN=SNRNP70 PE=1 SV=2	1	9	9	9	6	9	5	7	6	9	5	7	6	9	5	7	16	16	16	51.556	437	437	0	26.035	By MS/MS	By MS/MS	By MS/MS	By MS/MS	351.56	128380	141290	151760	108180	127430	123780	100820	153200	117310	701.67	120830	133220	154340
P08670;P17661	P08670	12;2	11;2	9;0	Vimentin	VIM	sp|P08670|VIME_HUMAN Vimentin OS=Homo sapiens GN=VIM PE=1 SV=4	2	12	11	9	6	11	2	7	5	10	1	6	4	8	1	5	29.2	27.7	24	53.651	466	466;470	0	54.413	By MS/MS	By MS/MS	By matching	By MS/MS	8851.8	127970	120320	128800	112570	135680	123110	86164	134630	95396	8815.6	120420	114320	133070
P08708	P08708	6	6	6	40S ribosomal protein S17	RPS17	sp|P08708|RS17_HUMAN 40S ribosomal protein S17 OS=Homo sapiens GN=RPS17 PE=1 SV=2	1	6	6	6	2	6	2	5	2	6	2	5	2	6	2	5	46.7	46.7	46.7	15.55	135	135	0	25.051	By MS/MS	By MS/MS	By matching	By MS/MS	949.57	133650	139580	146920	160960	172300	173010	107860	182230	133150	1199.5	126050	132400	151400
P09012;P08579	P09012	3;1	3;1	3;1	U1 small nuclear ribonucleoprotein A	SNRPA	sp|P09012|SNRPA_HUMAN U1 small nuclear ribonucleoprotein A OS=Homo sapiens GN=SNRPA PE=1 SV=3	2	3	3	3	1	3	2	3	1	3	2	3	1	3	2	3	8.9	8.9	8.9	31.279	282	282;225	0	5.6352	By matching	By MS/MS	By matching	By MS/MS	11.795	101300	126450	131500	53021	64564	61613	50929	72888	45426	789.74	95122	118590	131790
P09211	P09211	2	2	2	Glutathione S-transferase P	GSTP1	sp|P09211|GSTP1_HUMAN Glutathione S-transferase P OS=Homo sapiens GN=GSTP1 PE=1 SV=2	1	2	2	2	2	2	1	2	2	2	1	2	2	2	1	2	14.3	14.3	14.3	23.356	210	210	0	15.451	By matching	By MS/MS	By matching	By MS/MS	0	16533	18143	19337	16277	18222	16785	15494	29383	22551	0	15573	17137	19732
P09496	P09496	3	3	3	Clathrin light chain A	CLTA	sp|P09496|CLCA_HUMAN Clathrin light chain A OS=Homo sapiens GN=CLTA PE=1 SV=1	1	3	3	3	1	3	1	3	1	3	1	3	1	3	1	3	10.5	10.5	10.5	27.076	248	248	0	5.1062	By matching	By MS/MS	By matching	By MS/MS	84.986	62535	60385	63108	46940	51891	50194	33425	61333	45788	463.07	58740	56940	64798
P09497	P09497	2	2	2	Clathrin light chain B	CLTB	sp|P09497|CLCB_HUMAN Clathrin light chain B OS=Homo sapiens GN=CLTB PE=1 SV=1	1	2	2	2	0	2	0	2	0	2	0	2	0	2	0	2	8.3	8.3	8.3	25.19	229	229	0	2.3334		By MS/MS		By MS/MS	0	20579	23504	24446	21472	23971	21984	15444	25892	18205	0	19395	22205	24948
P09543	P09543	1	1	1	2,3-cyclic-nucleotide 3-phosphodiesterase	CNP	sp|P09543|CN37_HUMAN 2,3-cyclic-nucleotide 3-phosphodiesterase OS=Homo sapiens GN=CNP PE=1 SV=2	1	1	1	1	0	0	0	1	0	0	0	1	0	0	0	1	2.4	2.4	2.4	47.578	421	421	0.0074906	1.171				By MS/MS	0	8326.6	7366.1	6520	8266.8	12743	7480.7	8895.8	10193	9751.4	0	7857.8	6980.8	7025.7
P09651;Q32P51	P09651	3;1	3;1	3;1	Heterogeneous nuclear ribonucleoprotein A1;Heterogeneous nuclear ribonucleoprotein A1, N-terminally processed	HNRNPA1	sp|P09651|ROA1_HUMAN Heterogeneous nuclear ribonucleoprotein A1 OS=Homo sapiens GN=HNRNPA1 PE=1 SV=5	2	3	3	3	3	3	1	3	3	3	1	3	3	3	1	3	10.8	10.8	10.8	38.746	372	372;320	0	29.739	By MS/MS	By MS/MS	By matching	By MS/MS	268.58	99364	78184	80712	51766	58832	61736	43401	61347	52058	449.46	93086	73608	84038
P09669	P09669	1	1	1	Cytochrome c oxidase subunit 6C	COX6C	sp|P09669|COX6C_HUMAN Cytochrome c oxidase subunit 6C OS=Homo sapiens GN=COX6C PE=1 SV=2	1	1	1	1	0	1	0	1	0	1	0	1	0	1	0	1	10.7	10.7	10.7	8.7813	75	75	0.0074166	1.1496		By MS/MS		By matching	0	22712	14705	33698	15662	14614	17237	10349	13151	8047.3	0	21343	13924	33492
P09874	P09874	1	1	1	Poly [ADP-ribose] polymerase 1	PARP1	sp|P09874|PARP1_HUMAN Poly [ADP-ribose] polymerase 1 OS=Homo sapiens GN=PARP1 PE=1 SV=4	1	1	1	1	1	0	0	0	1	0	0	0	1	0	0	0	1	1	1	113.08	1014	1014	0.0097324	1.0952	By MS/MS				0	9458.2	3734.7	5732.5	4214.9	6527.1	5569.9	6075.4	2711.7	7401.6	0	8860.2	3539.6	6201.7
P0C0L5;P0C0L4	P0C0L5;P0C0L4	1;1	1;1	1;1	Complement C4-B;Complement C4 beta chain;Complement C4-B alpha chain;C4a anaphylatoxin;C4b-B;C4d-B;Complement C4 gamma chain;Complement C4-A;Complement C4 beta chain;Complement C4-A alpha chain;C4a anaphylatoxin;C4b-A;C4d-A;Complement C4 gamma chain	C4B;C4A	sp|P0C0L5|CO4B_HUMAN Complement C4-B OS=Homo sapiens GN=C4B PE=1 SV=2;sp|P0C0L4|CO4A_HUMAN Complement C4-A OS=Homo sapiens GN=C4A PE=1 SV=2	2	1	1	1	1	0	1	0	1	0	1	0	1	0	1	0	0.5	0.5	0.5	192.75	1744	1744;1744	0.0013774	1.6723	By matching		By MS/MS		0	4817.5	4962.2	6501	49937	7743.4	13891	5281.8	5821.9	8499.4	0	4559.2	5324.1	6625
P0C2Y1;Q9H094;Q6P3W6;Q86T75;Q3BBW0;Q3BBV2;Q3BBV1;Q3BBV0	P0C2Y1;Q9H094;Q6P3W6;Q86T75;Q3BBW0;Q3BBV2;Q3BBV1;Q3BBV0	1;1;1;1;1;1;1;1	1;1;1;1;1;1;1;1	1;1;1;1;1;1;1;1	Putative neuroblastoma breakpoint family member 7;Neuroblastoma breakpoint family member 3;Neuroblastoma breakpoint family member 10;Neuroblastoma breakpoint family member 11;Neuroblastoma breakpoint family member 9;Putative neuroblastoma breakpoint family member 8;Neuroblastoma breakpoint family member 20;Neuroblastoma breakpoint family member 1	NBPF7;NBPF3;NBPF10;NBPF11;NBPF9;NBPF8;NBPF20;NBPF1	sp|P0C2Y1|NBPF7_HUMAN Putative neuroblastoma breakpoint family member 7 OS=Homo sapiens GN=NBPF7 PE=5 SV=1;sp|Q9H094|NBPF3_HUMAN Neuroblastoma breakpoint family member 3 OS=Homo sapiens GN=NBPF3 PE=2 SV=1;sp|Q6P3W6|NBPFA_HUMAN Neuroblastoma breakpoint fami	8	1	1	1	0	1	0	1	0	1	0	1	0	1	0	1	1.9	1.9	1.9	48.09	421	421;633;841;865;867;869;942;1214	0.0097087	1.0912		By matching		By MS/MS	0	3108	1894.5	2618.8	2503.4	3807.4	2435.6	2227.8	3092.6	2301.6	0	2926.6	1800.6	2769.8
P47985;P0C7P4	P47985;P0C7P4	1;1	1;1	1;1	Cytochrome b-c1 complex subunit Rieske, mitochondrial;Cytochrome b-c1 complex subunit 11;Putative cytochrome b-c1 complex subunit Rieske-like protein 1	UQCRFS1;UQCRFS1P1	sp|P47985|UCRI_HUMAN Cytochrome b-c1 complex subunit Rieske, mitochondrial OS=Homo sapiens GN=UQCRFS1 PE=1 SV=2;sp|P0C7P4|UCRIL_HUMAN Putative cytochrome b-c1 complex subunit Rieske-like protein 1 OS=Homo sapiens GN=UQCRFS1P1 PE=5 SV=1	2	1	1	1	0	1	1	1	0	1	1	1	0	1	1	1	3.3	3.3	3.3	29.668	274	274;283	0.0052151	1.3548		By matching	By MS/MS	By matching	0	21500	9537.7	6563.4	19685	9666.6	12858	7550.3	9721.9	15121	0	20078	9164.5	7913.6
Q01105;P0DME0	Q01105;P0DME0	1;1	1;1	1;1	Protein SET;Protein SETSIP	SET;SETSIP	sp|Q01105|SET_HUMAN Protein SET OS=Homo sapiens GN=SET PE=1 SV=3;sp|P0DME0|SETLP_HUMAN Protein SETSIP OS=Homo sapiens GN=SETSIP PE=1 SV=1	2	1	1	1	1	1	1	0	1	1	1	0	1	1	1	0	2.8	2.8	2.8	33.488	290	290;302	0.0096852	1.088	By MS/MS	By matching	By matching		937.54	33628	12899	18582	14214	24636	17139	14124	8735.1	23284	969.11	31506	12285	20407
P0DMV9;P0DMV8	P0DMV9;P0DMV8	34;34	28;28	16;16	Heat shock 70 kDa protein 1B;Heat shock 70 kDa protein 1A	HSPA1B;HSPA1A	sp|P0DMV9|HS71B_HUMAN Heat shock 70 kDa protein 1B OS=Homo sapiens GN=HSPA1B PE=1 SV=1;sp|P0DMV8|HS71A_HUMAN Heat shock 70 kDa protein 1A OS=Homo sapiens GN=HSPA1A PE=1 SV=1	2	34	28	16	27	32	31	33	22	27	25	28	12	15	15	16	61	55.4	31.8	70.051	641	641;641	0	260.29	By MS/MS	By MS/MS	By MS/MS	By MS/MS	3009.5	1416200	1299700	1425600	1431000	1375800	1506100	1030500	1423500	1547800	7011.8	1331800	1231500	1469600
P0DN76;Q01081;Q8WU68	P0DN76;Q01081;Q8WU68	2;2;1	2;2;1	2;2;1	Splicing factor U2AF 35 kDa subunit;Splicing factor U2AF 26 kDa subunit	U2AF1;U2AF1L4	sp|P0DN76|U2AF5_HUMAN Splicing factor U2AF 35 kDa subunit-like protein OS=Homo sapiens GN=U2AF1L5 PE=1 SV=1;sp|Q01081|U2AF1_HUMAN Splicing factor U2AF 35 kDa subunit OS=Homo sapiens GN=U2AF1 PE=1 SV=3;sp|Q8WU68|U2AF4_HUMAN Splicing factor U2AF 26 kDa subun	3	2	2	2	0	2	0	2	0	2	0	2	0	2	0	2	10.4	10.4	10.4	27.872	240	240;240;220	0	3.46		By MS/MS		By MS/MS	0	10431	10306	11335	6685.7	8010.3	7591.4	6139	8979.3	7964.7	0	9796.1	9698.3	11546
P0DP25;P0DP24;P0DP23	P0DP25;P0DP24;P0DP23	1;1;1	1;1;1	1;1;1			sp|P0DP25|CALM3_HUMAN Calmodulin-3 OS=Homo sapiens GN=CALM3 PE=1 SV=1;sp|P0DP24|CALM2_HUMAN Calmodulin-2 OS=Homo sapiens GN=CALM2 PE=1 SV=1;sp|P0DP23|CALM1_HUMAN Calmodulin-1 OS=Homo sapiens GN=CALM1 PE=1 SV=1	3	1	1	1	1	1	0	1	1	1	0	1	1	1	0	1	8.7	8.7	8.7	16.837	149	149;149;149	0	2.5031	By MS/MS	By matching		By matching	0	6243.9	3475.8	4622.6	4511.2	6725.2	6409.8	6001.6	2781.8	7363.5	0	5870.2	3302.5	4942.8
P10412;P16403;P16402;Q02539;P22492;P16401	P10412;P16403;P16402	7;6;6;3;2;2	7;6;6;3;2;2	7;6;6;3;2;2	Histone H1.4;Histone H1.2;Histone H1.3	HIST1H1E;HIST1H1C;HIST1H1D	sp|P10412|H14_HUMAN Histone H1.4 OS=Homo sapiens GN=HIST1H1E PE=1 SV=2;sp|P16403|H12_HUMAN Histone H1.2 OS=Homo sapiens GN=HIST1H1C PE=1 SV=2;sp|P16402|H13_HUMAN Histone H1.3 OS=Homo sapiens GN=HIST1H1D PE=1 SV=2	6	7	7	7	6	7	6	5	6	7	6	5	6	7	6	5	29.7	29.7	29.7	21.865	219	219;213;221;215;207;226	0	23.611	By MS/MS	By MS/MS	By MS/MS	By MS/MS	6348.6	253980	203040	236920	255790	297980	242500	175240	207120	244940	7193.2	239140	193250	247400
P10515	P10515	4	4	4	Dihydrolipoyllysine-residue acetyltransferase component of pyruvate dehydrogenase complex, mitochondrial	DLAT	sp|P10515|ODP2_HUMAN Dihydrolipoyllysine-residue acetyltransferase component of pyruvate dehydrogenase complex, mitochondrial OS=Homo sapiens GN=DLAT PE=1 SV=3	1	4	4	4	2	3	1	4	2	3	1	4	2	3	1	4	9.9	9.9	9.9	68.996	647	647	0	15.298	By matching	By MS/MS	By matching	By MS/MS	409.79	52160	51432	57516	42798	47452	47861	35223	61370	47970	640.71	49045	48561	58719
P10599	P10599	6	6	6	Thioredoxin	TXN	sp|P10599|THIO_HUMAN Thioredoxin OS=Homo sapiens GN=TXN PE=1 SV=3	1	6	6	6	6	6	5	4	6	6	5	4	6	6	5	4	39	39	39	11.737	105	105	0	11.27	By MS/MS	By MS/MS	By MS/MS	By MS/MS	1134.7	170290	240590	262210	223930	234870	274130	164700	249960	207120	2372.2	160990	227440	263430
P10606	P10606	4	4	4	Cytochrome c oxidase subunit 5B, mitochondrial	COX5B	sp|P10606|COX5B_HUMAN Cytochrome c oxidase subunit 5B, mitochondrial OS=Homo sapiens GN=COX5B PE=1 SV=2	1	4	4	4	1	4	2	4	1	4	2	4	1	4	2	4	24	24	24	13.696	129	129	0	11.825	By matching	By MS/MS	By matching	By MS/MS	276.17	57103	68922	69670	59412	70056	65290	46477	77593	54544	422.36	53852	65084	71037
P10809	P10809	33	33	33	60 kDa heat shock protein, mitochondrial	HSPD1	sp|P10809|CH60_HUMAN 60 kDa heat shock protein, mitochondrial OS=Homo sapiens GN=HSPD1 PE=1 SV=2	1	33	33	33	25	30	27	32	25	30	27	32	25	30	27	32	56.7	56.7	56.7	61.054	573	573	0	282.4	By MS/MS	By MS/MS	By MS/MS	By MS/MS	6419.6	1515200	1436400	1575200	1558200	1682200	1717200	1333300	1531500	1887700	12022	1426600	1360900	1624600
P11021	P11021	16	14	14	78 kDa glucose-regulated protein	HSPA5	sp|P11021|GRP78_HUMAN 78 kDa glucose-regulated protein OS=Homo sapiens GN=HSPA5 PE=1 SV=2	1	16	14	14	12	13	12	14	10	11	10	12	10	11	10	12	29.2	28.1	28.1	72.332	654	654	0	67.174	By MS/MS	By MS/MS	By MS/MS	By MS/MS	557.63	281690	264490	287350	262110	243890	263700	184550	271860	309500	674.83	264690	250200	295030
P11142;P54652	P11142	35;13	35;13	26;6	Heat shock cognate 71 kDa protein	HSPA8	sp|P11142|HSP7C_HUMAN Heat shock cognate 71 kDa protein OS=Homo sapiens GN=HSPA8 PE=1 SV=1	2	35	35	26	28	32	33	32	28	32	33	32	20	24	24	24	55.4	55.4	47.4	70.897	646	646;639	0	245.65	By MS/MS	By MS/MS	By MS/MS	By MS/MS	11185	1903100	1691000	1878600	1689800	1758000	1839900	1360600	1757700	1998700	18267	1788800	1600400	1937600
P11177	P11177	2	2	2	Pyruvate dehydrogenase E1 component subunit beta, mitochondrial	PDHB	sp|P11177|ODPB_HUMAN Pyruvate dehydrogenase E1 component subunit beta, mitochondrial OS=Homo sapiens GN=PDHB PE=1 SV=3	1	2	2	2	1	2	1	2	1	2	1	2	1	2	1	2	6.4	6.4	6.4	39.233	359	359	0	8.2606	By matching	By MS/MS	By matching	By MS/MS	0	13821	12319	12719	13457	14887	14888	11193	18078	12924	0	13003	11669	13265
P11279	P11279	1	1	1	Lysosome-associated membrane glycoprotein 1	LAMP1	sp|P11279|LAMP1_HUMAN Lysosome-associated membrane glycoprotein 1 OS=Homo sapiens GN=LAMP1 PE=1 SV=3	1	1	1	1	1	1	1	1	1	1	1	1	1	1	1	1	2.2	2.2	2.2	44.882	417	417	0.0039735	1.4277	By MS/MS	By MS/MS	By matching	By matching	0	31442	22083	26167	24998	33810	23284	39580	20515	52918	0	29571	20931	27589
P11310	P11310	8	8	8	Medium-chain specific acyl-CoA dehydrogenase, mitochondrial	ACADM	sp|P11310|ACADM_HUMAN Medium-chain specific acyl-CoA dehydrogenase, mitochondrial OS=Homo sapiens GN=ACADM PE=1 SV=1	1	8	8	8	3	8	2	6	3	8	2	6	3	8	2	6	23.8	23.8	23.8	46.588	421	421	0	31.087	By matching	By MS/MS	By matching	By MS/MS	195.8	86275	86404	94433	69516	80320	80411	59223	97460	69985	390.15	81132	81513	96518
P11586	P11586	2	2	2	C-1-tetrahydrofolate synthase, cytoplasmic;Methylenetetrahydrofolate dehydrogenase;Methenyltetrahydrofolate cyclohydrolase;Formyltetrahydrofolate synthetase;C-1-tetrahydrofolate synthase, cytoplasmic, N-terminally processed	MTHFD1	sp|P11586|C1TC_HUMAN C-1-tetrahydrofolate synthase, cytoplasmic OS=Homo sapiens GN=MTHFD1 PE=1 SV=3	1	2	2	2	1	1	1	2	1	1	1	2	1	1	1	2	2	2	2	101.56	935	935	0.0027248	1.6232	By matching	By matching	By matching	By MS/MS	0	22354	18662	18264	17322	15662	16360	13274	26713	21142	0	20960	17635	19071
P11940;Q9H361;Q4VXU2;P0CB38;Q96DU9	P11940;Q9H361	36;20;7;1;1	36;20;7;1;1	22;16;4;0;1	Polyadenylate-binding protein 1;Polyadenylate-binding protein 3	PABPC1;PABPC3	sp|P11940|PABP1_HUMAN Polyadenylate-binding protein 1 OS=Homo sapiens GN=PABPC1 PE=1 SV=2;sp|Q9H361|PABP3_HUMAN Polyadenylate-binding protein 3 OS=Homo sapiens GN=PABPC3 PE=1 SV=2	5	36	36	22	23	35	24	36	23	35	24	36	15	22	16	22	52.4	52.4	30	70.67	636	636;631;614;370;382	0	268.46	By MS/MS	By MS/MS	By MS/MS	By MS/MS	4833.2	1703700	1621600	1712000	1399500	1516600	1464200	1245800	1834000	1606700	11345	1601100	1531200	1761300
P12004	P12004	11	11	11	Proliferating cell nuclear antigen	PCNA	sp|P12004|PCNA_HUMAN Proliferating cell nuclear antigen OS=Homo sapiens GN=PCNA PE=1 SV=1	1	11	11	11	9	10	10	9	9	10	10	9	9	10	10	9	59	59	59	28.768	261	261	0	75.583	By MS/MS	By MS/MS	By MS/MS	By MS/MS	1264.9	371590	314190	360760	391120	366520	376770	282030	370110	410570	2259.2	349420	298380	373300
P12236;P12235	P12236;P12235	16;10	16;10	6;3	ADP/ATP translocase 3;ADP/ATP translocase 3, N-terminally processed;ADP/ATP translocase 1	SLC25A6;SLC25A4	sp|P12236|ADT3_HUMAN ADP/ATP translocase 3 OS=Homo sapiens GN=SLC25A6 PE=1 SV=4;sp|P12235|ADT1_HUMAN ADP/ATP translocase 1 OS=Homo sapiens GN=SLC25A4 PE=1 SV=4	2	16	16	6	9	15	10	16	9	15	10	16	3	5	1	6	56.7	56.7	27.9	32.866	298	298;298	0	55.789	By MS/MS	By MS/MS	By MS/MS	By MS/MS	2063.9	513520	459680	479970	475700	489110	488590	385110	593040	482170	3581.9	482680	435210	498050
P13073	P13073	2	2	2	Cytochrome c oxidase subunit 4 isoform 1, mitochondrial	COX4I1	sp|P13073|COX41_HUMAN Cytochrome c oxidase subunit 4 isoform 1, mitochondrial OS=Homo sapiens GN=COX4I1 PE=1 SV=1	1	2	2	2	1	2	1	1	1	2	1	1	1	2	1	1	11.8	11.8	11.8	19.576	169	169	0	7.5005	By matching	By MS/MS	By matching	By MS/MS	464.66	44241	43125	50789	37326	43202	40569	30806	47492	35737	754.17	41628	40746	51758
P13639	P13639	10	10	9	Elongation factor 2	EEF2	sp|P13639|EF2_HUMAN Elongation factor 2 OS=Homo sapiens GN=EEF2 PE=1 SV=4	1	10	10	9	7	8	6	7	7	8	6	7	6	7	6	7	12.6	12.6	11.4	95.337	858	858	0	22.938	By MS/MS	By MS/MS	By MS/MS	By MS/MS	750.13	176680	120520	136590	123130	136510	131730	102640	131860	142890	1214.7	165720	114100	143820
Q9HAU6;P13693	Q9HAU6;P13693	1;1	1;1	1;1	Putative translationally-controlled tumor protein-like protein TPT1P8;Translationally-controlled tumor protein	TPT1P8;TPT1	sp|Q9HAU6|TCTP8_HUMAN Putative translationally-controlled tumor protein-like protein TPT1P8 OS=Homo sapiens GN=TPT1P8 PE=5 SV=2;sp|P13693|TCTP_HUMAN Translationally-controlled tumor protein OS=Homo sapiens GN=TPT1 PE=1 SV=1	2	1	1	1	1	0	0	1	1	0	0	1	1	0	0	1	5.8	5.8	5.8	15.994	139	139;172	0.003963	1.4207	By MS/MS			By matching	105.57	8520.2	3018	5969.7	2636.5	3183.7	6830.8	3515.4	1593.6	4058.3	120.8	7964.5	2856.9	6267
P13804	P13804	4	4	4	Electron transfer flavoprotein subunit alpha, mitochondrial	ETFA	sp|P13804|ETFA_HUMAN Electron transfer flavoprotein subunit alpha, mitochondrial OS=Homo sapiens GN=ETFA PE=1 SV=1	1	4	4	4	2	4	2	3	2	4	2	3	2	4	2	3	13.8	13.8	13.8	35.079	333	333	0	12.712	By matching	By MS/MS	By matching	By MS/MS	238.2	25132	23363	22694	32615	35128	28669	25631	41379	21621	345.59	23703	22247	23933
P14174	P14174	1	1	1	Macrophage migration inhibitory factor	MIF	sp|P14174|MIF_HUMAN Macrophage migration inhibitory factor OS=Homo sapiens GN=MIF PE=1 SV=4	1	1	1	1	1	1	1	1	1	1	1	1	1	1	1	1	7.8	7.8	7.8	12.476	115	115	0	2.3031	By MS/MS	By matching	By matching	By matching	284.86	37460	12295	12489	5090.1	7946.1	11903	5954.6	3196.3	7093.2	356.9	34920	11550	14533
P14209	P14209	2	2	2	CD99 antigen	CD99	sp|P14209|CD99_HUMAN CD99 antigen OS=Homo sapiens GN=CD99 PE=1 SV=1	1	2	2	2	2	1	1	1	2	1	1	1	2	1	1	1	13	13	13	18.848	185	185	0	3.0585	By MS/MS	By matching	By MS/MS	By matching	0	4523.3	2839.6	3132	4168	4584.7	5644.5	4765.4	3309.9	6160.4	0	4249.7	2704.8	3370.4
P14314	P14314	2	2	2	Glucosidase 2 subunit beta	PRKCSH	sp|P14314|GLU2B_HUMAN Glucosidase 2 subunit beta OS=Homo sapiens GN=PRKCSH PE=1 SV=2	1	2	2	2	1	2	0	1	1	2	0	1	1	2	0	1	3.6	3.6	3.6	59.425	528	528	0	2.0881	By matching	By MS/MS		By matching	108.53	14568	20010	23571	13131	17129	15627	11195	17165	10122	161.96	13755	18840	23520
P14406	P14406	2	2	2	Cytochrome c oxidase subunit 7A2, mitochondrial	COX7A2	sp|P14406|CX7A2_HUMAN Cytochrome c oxidase subunit 7A2, mitochondrial OS=Homo sapiens GN=COX7A2 PE=1 SV=1	1	2	2	2	1	2	1	2	1	2	1	2	1	2	1	2	27.7	27.7	27.7	9.3959	83	83	0	5.1044	By matching	By MS/MS	By matching	By MS/MS	0	37440	33613	37061	30685	32999	31205	23457	45418	32122	0	35180	31756	38172
P14618;P30613	P14618	3;1	3;1	3;1	Pyruvate kinase PKM	PKM	sp|P14618|KPYM_HUMAN Pyruvate kinase PKM OS=Homo sapiens GN=PKM PE=1 SV=4	2	3	3	3	2	3	1	2	2	3	1	2	2	3	1	2	7.5	7.5	7.5	57.936	531	531;574	0	24.409	By matching	By MS/MS	By matching	By MS/MS	323.7	28893	33258	32908	29831	33972	28295	24215	41498	22986	435.14	27228	31435	33713
P14625;Q58FF3	P14625	7;1	5;1	5;1	Endoplasmin	HSP90B1	sp|P14625|ENPL_HUMAN Endoplasmin OS=Homo sapiens GN=HSP90B1 PE=1 SV=1	2	7	5	5	2	7	1	5	1	5	1	3	1	5	1	3	7.5	5.7	5.7	92.468	803	803;399	0	7.0448	By matching	By MS/MS	By matching	By MS/MS	217.43	36196	32234	38522	20664	22217	19616	16143	30954	26381	420.92	33949	30345	39158
P63162;P14678	P63162;P14678	7;7	7;7	7;7	Small nuclear ribonucleoprotein-associated protein N;Small nuclear ribonucleoprotein-associated proteins B and B	SNRPN;SNRPB	sp|P63162|RSMN_HUMAN Small nuclear ribonucleoprotein-associated protein N OS=Homo sapiens GN=SNRPN PE=1 SV=1;sp|P14678|RSMB_HUMAN Small nuclear ribonucleoprotein-associated proteins B and B OS=Homo sapiens GN=SNRPB PE=1 SV=2	2	7	7	7	4	7	2	7	4	7	2	7	4	7	2	7	27.1	27.1	27.1	24.614	240	240;240	0	22.672	By MS/MS	By MS/MS	By matching	By MS/MS	576.79	155400	136170	145500	103860	121330	115640	99785	170360	142310	960.22	145870	128400	150230
P14854	P14854	3	3	3	Cytochrome c oxidase subunit 6B1	COX6B1	sp|P14854|CX6B1_HUMAN Cytochrome c oxidase subunit 6B1 OS=Homo sapiens GN=COX6B1 PE=1 SV=2	1	3	3	3	2	3	3	3	2	3	3	3	2	3	3	3	25.6	25.6	25.6	10.192	86	86	0	3.6432	By MS/MS	By MS/MS	By matching	By MS/MS	381	72478	58182	64729	45372	53865	50045	38098	54674	42898	562.11	68002	54886	67069
P14866	P14866	9	9	9	Heterogeneous nuclear ribonucleoprotein L	HNRNPL	sp|P14866|HNRPL_HUMAN Heterogeneous nuclear ribonucleoprotein L OS=Homo sapiens GN=HNRNPL PE=1 SV=2	1	9	9	9	4	8	3	9	4	8	3	9	4	8	3	9	18.3	18.3	18.3	64.132	589	589	0	36.579	By matching	By MS/MS	By matching	By MS/MS	334.64	126230	114260	125620	91232	101930	98735	75263	133150	95935	433.42	118550	107790	129070
P14868	P14868	3	3	3	Aspartate--tRNA ligase, cytoplasmic	DARS	sp|P14868|SYDC_HUMAN Aspartate--tRNA ligase, cytoplasmic OS=Homo sapiens GN=DARS PE=1 SV=2	1	3	3	3	1	2	2	3	1	2	2	3	1	2	2	3	5.6	5.6	5.6	57.136	501	501	0	4.1791	By matching	By MS/MS	By MS/MS	By MS/MS	0	43139	27966	30199	35527	31434	28835	22252	38295	32174	0	40439	26561	32119
P15531;P22392;O60361	P15531;P22392	3;3;1	3;3;1	3;3;1	Nucleoside diphosphate kinase A;Nucleoside diphosphate kinase B	NME1;NME2	sp|P15531|NDKA_HUMAN Nucleoside diphosphate kinase A OS=Homo sapiens GN=NME1 PE=1 SV=1;sp|P22392|NDKB_HUMAN Nucleoside diphosphate kinase B OS=Homo sapiens GN=NME2 PE=1 SV=1	3	3	3	3	2	1	3	2	2	1	3	2	2	1	3	2	25	25	25	17.149	152	152;152;137	0	7.7965	By MS/MS	By MS/MS	By MS/MS	By MS/MS	1482	85139	58002	66970	64942	61102	79800	45731	62386	69830	1765.7	79831	55068	70252
P15735;Q16816	P15735	14;2	14;2	14;2	Phosphorylase b kinase gamma catalytic chain, liver/testis isoform	PHKG2	sp|P15735|PHKG2_HUMAN Phosphorylase b kinase gamma catalytic chain, liver/testis isoform OS=Homo sapiens GN=PHKG2 PE=1 SV=1	2	14	14	14	10	13	13	10	10	13	13	10	10	13	13	10	34.7	34.7	34.7	46.442	406	406;387	0	48.87	By MS/MS	By MS/MS	By MS/MS	By MS/MS	1280.7	363620	349270	391220	359670	337830	356900	280230	317230	441770	2774.7	341920	330630	400430
P15880	P15880	11	11	11	40S ribosomal protein S2	RPS2	sp|P15880|RS2_HUMAN 40S ribosomal protein S2 OS=Homo sapiens GN=RPS2 PE=1 SV=2	1	11	11	11	8	11	7	11	8	11	7	11	8	11	7	11	36.2	36.2	36.2	31.324	293	293	0	32.384	By MS/MS	By MS/MS	By MS/MS	By MS/MS	1471.2	397870	372770	401560	370450	410780	393900	290290	454880	393640	2477.6	374330	352690	414480
P15924	P15924	4	4	4	Desmoplakin	DSP	sp|P15924|DESP_HUMAN Desmoplakin OS=Homo sapiens GN=DSP PE=1 SV=3	1	4	4	4	1	3	1	4	1	3	1	4	1	3	1	4	1.5	1.5	1.5	331.77	2871	2871	0	5.4334	By matching	By matching	By MS/MS	By MS/MS	0	31684	24343	28189	22845	23450	24117	16643	33000	28147	0	29726	23007	29216
P16152	P16152	1	1	1	Carbonyl reductase [NADPH] 1	CBR1	sp|P16152|CBR1_HUMAN Carbonyl reductase [NADPH] 1 OS=Homo sapiens GN=CBR1 PE=1 SV=3	1	1	1	1	1	0	0	1	1	0	0	1	1	0	0	1	4	4	4	30.375	277	277	0	1.7686	By matching			By MS/MS	0	17525	11495	11655	10362	10252	10854	7042.4	15421	12312	0	16407	10858	12407
P16435	P16435	1	1	1	NADPH--cytochrome P450 reductase	POR	sp|P16435|NCPR_HUMAN NADPH--cytochrome P450 reductase OS=Homo sapiens GN=POR PE=1 SV=2	1	1	1	1	0	1	0	1	0	1	0	1	0	1	0	1	3.5	3.5	3.5	76.689	677	677	0	3.8751		By MS/MS		By matching	0	2525.3	2851.2	3171.1	2168.4	2901.6	2503.9	1501.8	3022.7	2092.4	0	2380.4	2687.6	3220.3
P16615;O14983;Q93084	P16615	8;3;1	8;3;1	8;3;1	Sarcoplasmic/endoplasmic reticulum calcium ATPase 2	ATP2A2	sp|P16615|AT2A2_HUMAN Sarcoplasmic/endoplasmic reticulum calcium ATPase 2 OS=Homo sapiens GN=ATP2A2 PE=1 SV=1	3	8	8	8	3	8	4	8	3	8	4	8	3	8	4	8	10	10	10	114.76	1042	1042;1001;1043	0	19.395	By MS/MS	By MS/MS	By matching	By MS/MS	77.962	82291	80700	95354	66988	77787	69886	56601	87862	79799	203.47	77414	76154	97029
P16989	P16989	6	4	4	Y-box-binding protein 3	YBX3	sp|P16989|YBOX3_HUMAN Y-box-binding protein 3 OS=Homo sapiens GN=YBX3 PE=1 SV=4	1	6	4	4	1	6	3	6	1	4	2	4	1	4	2	4	18	14	14	40.089	372	372	0	10.312	By matching	By MS/MS	By matching	By MS/MS	132.34	15771	11397	13881	11642	15679	11186	12556	19018	11147	130.14	14826	10793	14510
P17066;P48741	P17066;P48741	10;5	1;1	1;1	Heat shock 70 kDa protein 6;Putative heat shock 70 kDa protein 7	HSPA6;HSPA7	sp|P17066|HSP76_HUMAN Heat shock 70 kDa protein 6 OS=Homo sapiens GN=HSPA6 PE=1 SV=2;sp|P48741|HSP77_HUMAN Putative heat shock 70 kDa protein 7 OS=Homo sapiens GN=HSPA7 PE=5 SV=2	2	10	1	1	8	10	10	10	1	1	1	1	1	1	1	1	15.7	1.7	1.7	71.027	643	643;367	0	18.27	By MS/MS	By MS/MS	By MS/MS	By MS/MS	232.52	45406	30257	31069	38564	35446	36984	46128	32967	60794	248.33	42579	28754	33200
P17812;Q9NRF8	P17812	4;1	4;1	4;1	CTP synthase 1	CTPS1	sp|P17812|PYRG1_HUMAN CTP synthase 1 OS=Homo sapiens GN=CTPS1 PE=1 SV=2	2	4	4	4	1	2	1	4	1	2	1	4	1	2	1	4	6.8	6.8	6.8	66.69	591	591;586	0	9.7627	By matching	By MS/MS	By matching	By MS/MS	0	26791	22835	26459	18761	19479	19863	17576	28668	26797	0	25143	21544	27146
P17980	P17980	13	13	13	26S protease regulatory subunit 6A	PSMC3	sp|P17980|PRS6A_HUMAN 26S proteasome regulatory subunit 6A OS=Homo sapiens GN=PSMC3 PE=1 SV=3	1	13	13	13	8	12	10	11	8	12	10	11	8	12	10	11	31.9	31.9	31.9	49.203	439	439	0	35.417	By matching	By MS/MS	By MS/MS	By MS/MS	338.84	175570	175230	183380	200260	224370	222040	159110	253960	193090	695.14	165520	166140	189840
P17987	P17987	21	21	21	T-complex protein 1 subunit alpha	TCP1	sp|P17987|TCPA_HUMAN T-complex protein 1 subunit alpha OS=Homo sapiens GN=TCP1 PE=1 SV=1	1	21	21	21	13	18	6	19	13	18	6	19	13	18	6	19	48.4	48.4	48.4	60.343	556	556	0	99.004	By MS/MS	By MS/MS	By matching	By MS/MS	1450.4	283230	306750	325950	239010	276840	284030	208800	362720	264530	2283.4	266500	289330	332110
P18077	P18077	5	5	5	60S ribosomal protein L35a	RPL35A	sp|P18077|RL35A_HUMAN 60S ribosomal protein L35a OS=Homo sapiens GN=RPL35A PE=1 SV=2	1	5	5	5	2	3	1	5	2	3	1	5	2	3	1	5	38.2	38.2	38.2	12.538	110	110	0	7.7391	By matching	By MS/MS	By matching	By MS/MS	108.35	81182	87201	91456	76994	93935	83451	54118	72665	64926	353.75	76490	82355	93743
P84085;P18085;P84077;P61204	P84085;P18085;P84077;P61204	1;1;1;1	1;1;1;1	1;1;1;1	ADP-ribosylation factor 5;ADP-ribosylation factor 4;ADP-ribosylation factor 1;ADP-ribosylation factor 3	ARF5;ARF4;ARF1;ARF3	sp|P84085|ARF5_HUMAN ADP-ribosylation factor 5 OS=Homo sapiens GN=ARF5 PE=1 SV=2;sp|P18085|ARF4_HUMAN ADP-ribosylation factor 4 OS=Homo sapiens GN=ARF4 PE=1 SV=3;sp|P84077|ARF1_HUMAN ADP-ribosylation factor 1 OS=Homo sapiens GN=ARF1 PE=1 SV=2;sp|P61204|ARF	4	1	1	1	0	1	0	1	0	1	0	1	0	1	0	1	11.7	11.7	11.7	20.529	180	180;180;181;181	0	12.083		By MS/MS		By MS/MS	0	6093.8	8358.1	8975.7	7383	7109.9	7771.5	6042.7	12170	8221.1	0	5749.9	7892.9	9010.9
P18124	P18124	11	11	11	60S ribosomal protein L7	RPL7	sp|P18124|RL7_HUMAN 60S ribosomal protein L7 OS=Homo sapiens GN=RPL7 PE=1 SV=1	1	11	11	11	4	10	5	10	4	10	5	10	4	10	5	10	40.7	40.7	40.7	29.225	248	248	0	54.712	By MS/MS	By MS/MS	By MS/MS	By MS/MS	938.11	290180	283240	292430	264830	268760	272840	189000	266430	243410	1753.8	272780	267740	301050
P18583	P18583	3	3	3	Protein SON	SON	sp|P18583|SON_HUMAN Protein SON OS=Homo sapiens GN=SON PE=1 SV=4	1	3	3	3	2	2	2	3	2	2	2	3	2	2	2	3	2.5	2.5	2.5	263.83	2426	2426	0	2.2941	By matching	By MS/MS	By matching	By MS/MS	0	47419	35066	36969	31271	39061	35857	29569	48837	35466	0	44499	33118	38954
P18621	P18621	8	8	8	60S ribosomal protein L17	RPL17	sp|P18621|RL17_HUMAN 60S ribosomal protein L17 OS=Homo sapiens GN=RPL17 PE=1 SV=3	1	8	8	8	8	7	6	8	8	7	6	8	8	7	6	8	41.3	41.3	41.3	21.397	184	184	0	52.32	By MS/MS	By MS/MS	By MS/MS	By MS/MS	1243.3	308050	328570	364200	324100	374270	374350	268800	345230	359120	2442.1	290440	310830	372230
P18859	P18859	5	5	5	ATP synthase-coupling factor 6, mitochondrial	ATP5J	sp|P18859|ATP5J_HUMAN ATP synthase-coupling factor 6, mitochondrial OS=Homo sapiens GN=ATP5J PE=1 SV=1	1	5	5	5	2	4	5	4	2	4	5	4	2	4	5	4	51.9	51.9	51.9	12.587	108	108	0	59.785	By MS/MS	By MS/MS	By MS/MS	By MS/MS	403.55	160740	184370	223310	216300	203060	215740	155410	180620	234100	1579.7	151740	174890	225540
P19338	P19338	22	22	22	Nucleolin	NCL	sp|P19338|NUCL_HUMAN Nucleolin OS=Homo sapiens GN=NCL PE=1 SV=3	1	22	22	22	15	21	9	19	15	21	9	19	15	21	9	19	29	29	29	76.613	710	710	0	168.67	By MS/MS	By MS/MS	By MS/MS	By MS/MS	4153.3	1061000	1060400	1132700	687340	785730	856000	525370	853400	661970	9613.1	996170	998180	1154700
P19404	P19404	1	1	1	NADH dehydrogenase [ubiquinone] flavoprotein 2, mitochondrial	NDUFV2	sp|P19404|NDUV2_HUMAN NADH dehydrogenase [ubiquinone] flavoprotein 2, mitochondrial OS=Homo sapiens GN=NDUFV2 PE=1 SV=2	1	1	1	1	0	1	0	1	0	1	0	1	0	1	0	1	5.2	5.2	5.2	27.391	249	249	0	3.919		By matching		By MS/MS	0	12208	8926.3	9489	8264.1	8457.8	8170.9	7028.4	12781	11153	0	11444	8434.8	9958.9
P19474	P19474	22	22	22	E3 ubiquitin-protein ligase TRIM21	TRIM21	sp|P19474|RO52_HUMAN E3 ubiquitin-protein ligase TRIM21 OS=Homo sapiens GN=TRIM21 PE=1 SV=1	1	22	22	22	18	22	17	18	18	22	17	18	18	22	17	18	45.9	45.9	45.9	54.169	475	475	0	142.39	By MS/MS	By MS/MS	By MS/MS	By MS/MS	1996.9	716920	634900	692490	731550	690240	680880	517380	604570	691140	4195.4	674010	602090	716460
P20339	P20339	2	1	1	Ras-related protein Rab-5A	RAB5A	sp|P20339|RAB5A_HUMAN Ras-related protein Rab-5A OS=Homo sapiens GN=RAB5A PE=1 SV=2	1	2	1	1	2	2	1	2	1	1	1	1	1	1	1	1	10.7	5.6	5.6	23.658	215	215	0	1.9644	By matching	By MS/MS	By matching	By matching	0	5479.6	4760.2	5068.6	3511.1	4444.9	4135.3	3358.3	4844.4	3128.7	0	5144.6	4485.5	5244
Q9NRW1;P20340;Q14964	Q9NRW1;P20340;Q14964	1;1;1	1;1;1	1;1;1	Ras-related protein Rab-6B;Ras-related protein Rab-6A;Ras-related protein Rab-39A	RAB6B;RAB6A;RAB39A	sp|Q9NRW1|RAB6B_HUMAN Ras-related protein Rab-6B OS=Homo sapiens GN=RAB6B PE=1 SV=1;sp|P20340|RAB6A_HUMAN Ras-related protein Rab-6A OS=Homo sapiens GN=RAB6A PE=1 SV=3;sp|Q14964|RB39A_HUMAN Ras-related protein Rab-39A OS=Homo sapiens GN=RAB39A PE=1 SV=2	3	1	1	1	1	1	1	1	1	1	1	1	1	1	1	1	5.3	5.3	5.3	23.461	208	208;208;217	0	6.9216	By MS/MS	By MS/MS	By matching	By MS/MS	178.03	71206	51042	58299	49226	53986	48984	44923	56992	60663	437.69	66796	48271	60973
P20645	P20645	3	3	3	Cation-dependent mannose-6-phosphate receptor	M6PR	sp|P20645|MPRD_HUMAN Cation-dependent mannose-6-phosphate receptor OS=Homo sapiens GN=M6PR PE=1 SV=1	1	3	3	3	2	1	2	1	2	1	2	1	2	1	2	1	10.5	10.5	10.5	30.993	277	277	0	6.4643	By MS/MS	By MS/MS	By MS/MS	By matching	121.08	37872	31002	37692	61265	43004	46915	36625	34214	53146	179.3	35658	29759	39063
P20674	P20674	4	4	4	Cytochrome c oxidase subunit 5A, mitochondrial	COX5A	sp|P20674|COX5A_HUMAN Cytochrome c oxidase subunit 5A, mitochondrial OS=Homo sapiens GN=COX5A PE=1 SV=2	1	4	4	4	3	4	3	2	3	4	3	2	3	4	3	2	26.7	26.7	26.7	16.762	150	150	0	6.2219	By MS/MS	By MS/MS	By MS/MS	By MS/MS	295.93	83455	68911	84347	68834	83361	79470	77130	82295	88052	421.8	78496	65207	86975
P21333;O75369;Q14315	P21333	15;1;1	15;1;1	15;1;1	Filamin-A	FLNA	sp|P21333|FLNA_HUMAN Filamin-A OS=Homo sapiens GN=FLNA PE=1 SV=4	3	15	15	15	8	14	9	9	8	14	9	9	8	14	9	9	7.1	7.1	7.1	280.74	2647	2647;2602;2725	0	43.334	By MS/MS	By MS/MS	By MS/MS	By MS/MS	2525.6	262230	246510	293990	223310	240470	225800	178180	233360	237380	3815.6	246600	233040	299770
P21796	P21796	12	12	12	Voltage-dependent anion-selective channel protein 1	VDAC1	sp|P21796|VDAC1_HUMAN Voltage-dependent anion-selective channel protein 1 OS=Homo sapiens GN=VDAC1 PE=1 SV=2	1	12	12	12	12	9	11	8	12	9	11	8	12	9	11	8	54.4	54.4	54.4	30.772	283	283	0	97.748	By MS/MS	By MS/MS	By MS/MS	By MS/MS	1620.9	357210	342800	376400	406060	416650	421790	294460	421090	428570	2687.8	336490	325270	388260
P21912	P21912	3	3	3	Succinate dehydrogenase [ubiquinone] iron-sulfur subunit, mitochondrial	SDHB	sp|P21912|SDHB_HUMAN Succinate dehydrogenase [ubiquinone] iron-sulfur subunit, mitochondrial OS=Homo sapiens GN=SDHB PE=1 SV=3	1	3	3	3	3	3	2	3	3	3	2	3	3	3	2	3	10	10	10	31.629	280	280	0	3.946	By MS/MS	By MS/MS	By MS/MS	By matching	19.152	53531	45671	52076	60275	53537	54183	40034	45855	52394	209.49	50344	43410	53896
P21964	P21964	1	1	1	Catechol O-methyltransferase	COMT	sp|P21964|COMT_HUMAN Catechol O-methyltransferase OS=Homo sapiens GN=COMT PE=1 SV=2	1	1	1	1	0	1	1	1	0	1	1	1	0	1	1	1	4.4	4.4	4.4	30.037	271	271	0.0085995	1.1394		By MS/MS	By matching	By matching	0	3931.3	4700.7	4864.4	3724.6	5193.3	4351.5	3209.9	5540.6	2780.4	0	3710.5	4433.1	4964.1
P22061	P22061	3	3	3	Protein-L-isoaspartate(D-aspartate) O-methyltransferase	PCMT1	sp|P22061|PIMT_HUMAN Protein-L-isoaspartate(D-aspartate) O-methyltransferase OS=Homo sapiens GN=PCMT1 PE=1 SV=4	1	3	3	3	2	3	1	3	2	3	1	3	2	3	1	3	12.3	12.3	12.3	24.636	227	227	0	6.0244	By matching	By MS/MS	By matching	By MS/MS	113.14	66073	57031	64351	51057	57419	53919	37880	68300	56583	419.64	62074	53873	66358
P22087;A6NHQ2	P22087	3;1	3;1	3;1	rRNA 2-O-methyltransferase fibrillarin	FBL	sp|P22087|FBRL_HUMAN rRNA 2-O-methyltransferase fibrillarin OS=Homo sapiens GN=FBL PE=1 SV=2	2	3	3	3	0	3	0	3	0	3	0	3	0	3	0	3	8.4	8.4	8.4	33.784	321	321;334	0	5.6155		By MS/MS		By MS/MS	248.62	63103	74886	76092	73775	83908	80861	58170	99131	74419	635.19	59555	70839	77837
P22102	P22102	1	1	1	Trifunctional purine biosynthetic protein adenosine-3;Phosphoribosylamine--glycine ligase;Phosphoribosylformylglycinamidine cyclo-ligase;Phosphoribosylglycinamide formyltransferase	GART	sp|P22102|PUR2_HUMAN Trifunctional purine biosynthetic protein adenosine-3 OS=Homo sapiens GN=GART PE=1 SV=1	1	1	1	1	1	1	1	1	1	1	1	1	1	1	1	1	0.9	0.9	0.9	107.77	1010	1010	0.0039683	1.4266	By matching	By MS/MS	By matching	By matching	101.86	11898	10717	11678	8084.2	10093	9191.8	6720.5	9988.2	6520.4	174.75	11177	10108	12027
P22234	P22234	2	2	2	Multifunctional protein ADE2;Phosphoribosylaminoimidazole-succinocarboxamide synthase;Phosphoribosylaminoimidazole carboxylase	PAICS	sp|P22234|PUR6_HUMAN Multifunctional protein ADE2 OS=Homo sapiens GN=PAICS PE=1 SV=3	1	2	2	2	1	0	1	2	1	0	1	2	1	0	1	2	4.2	4.2	4.2	47.079	425	425	0	2.6432	By MS/MS		By MS/MS	By MS/MS	0	34026	24451	27552	19552	23156	22939	16991	24502	28479	0	31898	23062	28778
P22626	P22626	1	1	1	Heterogeneous nuclear ribonucleoproteins A2/B1	HNRNPA2B1	sp|P22626|ROA2_HUMAN Heterogeneous nuclear ribonucleoproteins A2/B1 OS=Homo sapiens GN=HNRNPA2B1 PE=1 SV=2	1	1	1	1	1	1	1	1	1	1	1	1	1	1	1	1	2.8	2.8	2.8	37.429	353	353	0.0040053	1.4961	By MS/MS	By matching	By matching	By MS/MS	335.99	58903	26871	33137	25480	28614	29918	23146	27109	33124	419.71	55079	25423	35902
P22695	P22695	3	3	3	Cytochrome b-c1 complex subunit 2, mitochondrial	UQCRC2	sp|P22695|QCR2_HUMAN Cytochrome b-c1 complex subunit 2, mitochondrial OS=Homo sapiens GN=UQCRC2 PE=1 SV=3	1	3	3	3	2	3	1	2	2	3	1	2	2	3	1	2	6.8	6.8	6.8	48.442	453	453	0	9.7206	By matching	By MS/MS	By matching	By matching	79.014	33968	40682	41261	37360	44241	40073	26115	40868	22651	182.24	32052	38443	42155
P23246	P23246	6	5	5	Splicing factor, proline- and glutamine-rich	SFPQ	sp|P23246|SFPQ_HUMAN Splicing factor, proline- and glutamine-rich OS=Homo sapiens GN=SFPQ PE=1 SV=2	1	6	5	5	3	5	2	6	2	4	1	5	2	4	1	5	9.3	8.2	8.2	76.149	707	707	0	20.715	By matching	By MS/MS	By matching	By MS/MS	314.62	77577	78126	85696	75899	81353	79958	58865	110870	85003	534.45	73024	73896	87766
Q9NRH3;P23258	Q9NRH3;P23258	1;1	1;1	1;1	Tubulin gamma-2 chain;Tubulin gamma-1 chain	TUBG2;TUBG1	sp|Q9NRH3|TBG2_HUMAN Tubulin gamma-2 chain OS=Homo sapiens GN=TUBG2 PE=2 SV=1;sp|P23258|TBG1_HUMAN Tubulin gamma-1 chain OS=Homo sapiens GN=TUBG1 PE=1 SV=2	2	1	1	1	0	1	0	1	0	1	0	1	0	1	0	1	2	2	2	51.091	451	451;451	0.008547	1.1166		By MS/MS		By MS/MS	123.87	19189	14870	18371	14259	15128	13759	11509	19187	15823	189.97	18015	14066	18933
P23396	P23396	12	12	12	40S ribosomal protein S3	RPS3	sp|P23396|RS3_HUMAN 40S ribosomal protein S3 OS=Homo sapiens GN=RPS3 PE=1 SV=2	1	12	12	12	3	11	2	11	3	11	2	11	3	11	2	11	49.4	49.4	49.4	26.688	243	243	0	44.985	By matching	By MS/MS	By MS/MS	By MS/MS	1467.9	359350	325480	343060	293360	336150	323080	223960	402380	297610	2843.2	337760	307550	355080
P23458;O60674;P29597	P23458	35;1;1	35;1;1	35;1;1	Tyrosine-protein kinase JAK1	JAK1	sp|P23458|JAK1_HUMAN Tyrosine-protein kinase JAK1 OS=Homo sapiens GN=JAK1 PE=1 SV=2	3	35	35	35	20	33	23	32	20	33	23	32	20	33	23	32	31	31	31	133.28	1154	1154;1132;1187	0	122.33	By MS/MS	By MS/MS	By MS/MS	By MS/MS	4192.6	1014800	1004200	1058500	1140400	1059400	1027500	864720	1197600	1232200	8001.3	955000	952130	1089600
P23528	P23528	3	3	3	Cofilin-1	CFL1	sp|P23528|COF1_HUMAN Cofilin-1 OS=Homo sapiens GN=CFL1 PE=1 SV=3	1	3	3	3	3	3	3	3	3	3	3	3	3	3	3	3	21.1	21.1	21.1	18.502	166	166	0	7.935	By MS/MS	By MS/MS	By matching	By MS/MS	969.86	61009	45573	51162	40420	67556	46877	48566	47982	60222	1178.5	57394	43105	53948
P23588;REV__P23588	P23588	57;2	57;2	57;2	Eukaryotic translation initiation factor 4B	EIF4B	sp|P23588|IF4B_HUMAN Eukaryotic translation initiation factor 4B OS=Homo sapiens GN=EIF4B PE=1 SV=2	2	57	57	57	25	55	25	57	25	55	25	57	25	55	25	57	63.5	63.5	63.5	69.15	611	611;611	0	323.31	By MS/MS	By MS/MS	By MS/MS	By MS/MS	6974.4	2897400	2978600	3054100	2276500	2629800	2399100	2147300	3314500	2464900	18799	2723800	2808200	3130000
P24043	P24043	1	1	1	Laminin subunit alpha-2	LAMA2	sp|P24043|LAMA2_HUMAN Laminin subunit alpha-2 OS=Homo sapiens GN=LAMA2 PE=1 SV=4	1	1	1	1	0	1	0	1	0	1	0	1	0	1	0	1	0.3	0.3	0.3	343.9	3122	3122	0.0097442	1.107		By MS/MS		By matching	0	9135.8	13600	11717	59771	72769	30163	1440	2696.9	2292.9	0	9076.4	13512	13561
P24534	P24534	7	7	6	Elongation factor 1-beta	EEF1B2	sp|P24534|EF1B_HUMAN Elongation factor 1-beta OS=Homo sapiens GN=EEF1B2 PE=1 SV=3	1	7	7	6	5	7	5	6	5	7	5	6	5	6	5	5	26.2	26.2	23.1	24.763	225	225	0	12.84	By MS/MS	By MS/MS	By matching	By MS/MS	1063.1	252060	173500	203960	142140	165530	188510	145760	153550	174940	1615.7	236250	163760	212890
P24539	P24539	5	5	5	ATP synthase F(0) complex subunit B1, mitochondrial	ATP5F1	sp|P24539|AT5F1_HUMAN ATP synthase F(0) complex subunit B1, mitochondrial OS=Homo sapiens GN=ATP5F1 PE=1 SV=2	1	5	5	5	3	4	5	4	3	4	5	4	3	4	5	4	14.5	14.5	14.5	28.908	256	256	0	16.204	By MS/MS	By MS/MS	By MS/MS	By MS/MS	378.97	112220	91143	104190	131840	111270	105510	80732	104190	127720	662.9	105510	86815	108310
P24666	P24666	1	1	1	Low molecular weight phosphotyrosine protein phosphatase	ACP1	sp|P24666|PPAC_HUMAN Low molecular weight phosphotyrosine protein phosphatase OS=Homo sapiens GN=ACP1 PE=1 SV=3	1	1	1	1	0	0	0	1	0	0	0	1	0	0	0	1	11.4	11.4	11.4	18.042	158	158	0.0051348	1.278				By MS/MS	0	11913	8380.4	8218.2	6412.1	6883.5	6210.3	5296.3	9586.4	8493.8	0	11154	7900.1	8707.9
P24752	P24752	2	2	2	Acetyl-CoA acetyltransferase, mitochondrial	ACAT1	sp|P24752|THIL_HUMAN Acetyl-CoA acetyltransferase, mitochondrial OS=Homo sapiens GN=ACAT1 PE=1 SV=1	1	2	2	2	1	2	1	1	1	2	1	1	1	2	1	1	5.9	5.9	5.9	45.199	427	427	0	5.2398	By matching	By MS/MS	By matching	By MS/MS	0	6507.6	4912.7	6271	5502.7	6122.2	5077.8	4498.6	8994.7	8225.6	0	6117	4655.5	6485.7
P25205	P25205	6	6	6	DNA replication licensing factor MCM3	MCM3	sp|P25205|MCM3_HUMAN DNA replication licensing factor MCM3 OS=Homo sapiens GN=MCM3 PE=1 SV=3	1	6	6	6	1	4	0	6	1	4	0	6	1	4	0	6	9.4	9.4	9.4	90.98	808	808	0	10.473	By matching	By MS/MS		By MS/MS	60.501	38614	34923	40456	34221	37740	35584	29951	53401	42669	172.95	36319	33030	41556
P25398	P25398	9	9	9	40S ribosomal protein S12	RPS12	sp|P25398|RS12_HUMAN 40S ribosomal protein S12 OS=Homo sapiens GN=RPS12 PE=1 SV=3	1	9	9	9	6	9	4	9	6	9	4	9	6	9	4	9	80.3	80.3	80.3	14.515	132	132	0	58.038	By MS/MS	By MS/MS	By matching	By MS/MS	2257.3	323550	400110	419790	388370	447800	430350	279340	455260	344460	4212.9	305600	378490	427270
P25705	P25705	25	25	25	ATP synthase subunit alpha, mitochondrial	ATP5A1	sp|P25705|ATPA_HUMAN ATP synthase subunit alpha, mitochondrial OS=Homo sapiens GN=ATP5A1 PE=1 SV=1	1	25	25	25	22	22	22	22	22	22	22	22	22	22	22	22	52.3	52.3	52.3	59.75	553	553	0	247.92	By MS/MS	By MS/MS	By MS/MS	By MS/MS	5648.9	900950	803460	966130	963870	950200	917340	715770	861530	961760	8377.4	848010	762690	992220
P25789	P25789	13	13	13	Proteasome subunit alpha type-4	PSMA4	sp|P25789|PSA4_HUMAN Proteasome subunit alpha type-4 OS=Homo sapiens GN=PSMA4 PE=1 SV=1	1	13	13	13	7	11	6	11	7	11	6	11	7	11	6	11	50.2	50.2	50.2	29.483	261	261	0	83.275	By MS/MS	By MS/MS	By MS/MS	By MS/MS	875.3	339120	348600	381990	331690	361490	346040	273380	393820	384880	2039.9	319280	329590	390710
P26368	P26368	3	3	3	Splicing factor U2AF 65 kDa subunit	U2AF2	sp|P26368|U2AF2_HUMAN Splicing factor U2AF 65 kDa subunit OS=Homo sapiens GN=U2AF2 PE=1 SV=4	1	3	3	3	0	3	0	2	0	3	0	2	0	3	0	2	9.1	9.1	9.1	53.5	475	475	0	20.962		By MS/MS		By MS/MS	0	34001	33601	35901	24499	26859	26292	19685	33944	24117	0	31934	31658	36680
P26373	P26373	13	13	13	60S ribosomal protein L13	RPL13	sp|P26373|RL13_HUMAN 60S ribosomal protein L13 OS=Homo sapiens GN=RPL13 PE=1 SV=4	1	13	13	13	9	13	7	12	9	13	7	12	9	13	7	12	48.8	48.8	48.8	24.261	211	211	0	32.406	By MS/MS	By MS/MS	By MS/MS	By MS/MS	2325.9	427330	496090	563810	453040	574960	477990	395180	470830	499270	4907.8	403530	468830	572630
P26599;O95758	P26599	4;1	4;1	4;1	Polypyrimidine tract-binding protein 1	PTBP1	sp|P26599|PTBP1_HUMAN Polypyrimidine tract-binding protein 1 OS=Homo sapiens GN=PTBP1 PE=1 SV=1	2	4	4	4	3	4	1	4	3	4	1	4	3	4	1	4	10	10	10	57.221	531	531;552	0	32.353	By matching	By MS/MS	By matching	By MS/MS	0	23119	23699	24732	24710	28505	23031	18510	31764	18066	0	21791	22433	25517
P26641	P26641	9	9	9	Elongation factor 1-gamma	EEF1G	sp|P26641|EF1G_HUMAN Elongation factor 1-gamma OS=Homo sapiens GN=EEF1G PE=1 SV=3	1	9	9	9	5	9	4	8	5	9	4	8	5	9	4	8	21.1	21.1	21.1	50.118	437	437	0	36.646	By MS/MS	By MS/MS	By MS/MS	By MS/MS	927.01	258170	246110	264550	257800	244280	234840	187590	300450	247710	1669.4	242750	233040	272070
P27348;Q04917;P61981	P27348	5;2;2	5;2;2	2;0;0	14-3-3 protein theta	YWHAQ	sp|P27348|1433T_HUMAN 14-3-3 protein theta OS=Homo sapiens GN=YWHAQ PE=1 SV=1	3	5	5	2	4	5	3	5	4	5	3	5	1	2	0	2	18.8	18.8	9	27.764	245	245;246;247	0	14.974	By MS/MS	By MS/MS	By matching	By MS/MS	226.33	137660	85510	99165	62507	79797	80515	59558	73624	65232	405	128900	80584	104560
P27635;Q96L21	P27635;Q96L21	6;3	6;3	6;3	60S ribosomal protein L10;60S ribosomal protein L10-like	RPL10;RPL10L	sp|P27635|RL10_HUMAN 60S ribosomal protein L10 OS=Homo sapiens GN=RPL10 PE=1 SV=4;sp|Q96L21|RL10L_HUMAN 60S ribosomal protein L10-like OS=Homo sapiens GN=RPL10L PE=1 SV=3	2	6	6	6	3	6	4	5	3	6	4	5	3	6	4	5	22.9	22.9	22.9	24.604	214	214;214	0	13.446	By MS/MS	By MS/MS	By MS/MS	By MS/MS	507.08	125250	97877	100160	145350	149680	132220	88095	102210	120290	857.37	117890	93288	106490
P27708	P27708	10	10	10	CAD protein;Glutamine-dependent carbamoyl-phosphate synthase;Aspartate carbamoyltransferase;Dihydroorotase	CAD	sp|P27708|PYR1_HUMAN CAD protein OS=Homo sapiens GN=CAD PE=1 SV=3	1	10	10	10	4	9	3	10	4	9	3	10	4	9	3	10	4.7	4.7	4.7	242.98	2225	2225	0	17.849	By matching	By MS/MS	By matching	By MS/MS	186.04	121630	105150	121970	99001	117850	105460	89973	163260	122790	321.76	114370	99392	125760
P27824	P27824	12	12	12	Calnexin	CANX	sp|P27824|CALX_HUMAN Calnexin OS=Homo sapiens GN=CANX PE=1 SV=2	1	12	12	12	8	12	9	10	8	12	9	10	8	12	9	10	19.3	19.3	19.3	67.567	592	592	0	50.02	By MS/MS	By MS/MS	By MS/MS	By MS/MS	1357.2	412890	427870	495470	535740	510610	488720	374200	461490	473910	3332.4	389380	406360	506000
P28288	P28288	3	3	3	ATP-binding cassette sub-family D member 3	ABCD3	sp|P28288|ABCD3_HUMAN ATP-binding cassette sub-family D member 3 OS=Homo sapiens GN=ABCD3 PE=1 SV=1	1	3	3	3	2	3	1	2	2	3	1	2	2	3	1	2	7.1	7.1	7.1	75.475	659	659	0	7.9174	By matching	By MS/MS	By matching	By MS/MS	34.362	31244	31871	32045	24185	27283	25381	20213	32678	25790	166.88	29361	30044	32892
P28331	P28331	2	2	2	NADH-ubiquinone oxidoreductase 75 kDa subunit, mitochondrial	NDUFS1	sp|P28331|NDUS1_HUMAN NADH-ubiquinone oxidoreductase 75 kDa subunit, mitochondrial OS=Homo sapiens GN=NDUFS1 PE=1 SV=3	1	2	2	2	1	2	1	2	1	2	1	2	1	2	1	2	4	4	4	79.467	727	727	0	6.8036	By matching	By MS/MS	By matching	By MS/MS	0	11112	10461	11947	9205.3	11222	10230	7021.7	12098	8643.2	0	10455	9877.8	12253
P29692	P29692	6	5	5	Elongation factor 1-delta	EEF1D	sp|P29692|EF1D_HUMAN Elongation factor 1-delta OS=Homo sapiens GN=EEF1D PE=1 SV=5	1	6	5	5	3	5	3	6	3	4	3	5	3	4	3	5	27.4	24.9	24.9	31.121	281	281	0	90.513	By MS/MS	By MS/MS	By matching	By MS/MS	386.4	159080	129720	142700	102400	116550	114110	96881	130530	119950	793.36	149250	122360	147750
P29966	P29966	3	3	3	Myristoylated alanine-rich C-kinase substrate	MARCKS	sp|P29966|MARCS_HUMAN Myristoylated alanine-rich C-kinase substrate OS=Homo sapiens GN=MARCKS PE=1 SV=4	1	3	3	3	2	2	2	3	2	2	2	3	2	2	2	3	13.6	13.6	13.6	31.554	332	332	0	7.5625	By MS/MS	By matching	By MS/MS	By MS/MS	145.29	52722	63297	83240	69995	77092	70239	54785	72628	87062	264.2	49883	59981	83600
P30041	P30041	10	10	10	Peroxiredoxin-6	PRDX6	sp|P30041|PRDX6_HUMAN Peroxiredoxin-6 OS=Homo sapiens GN=PRDX6 PE=1 SV=3	1	10	10	10	8	9	8	7	8	9	8	7	8	9	8	7	43.8	43.8	43.8	25.035	224	224	0	67.566	By MS/MS	By MS/MS	By MS/MS	By MS/MS	1261.8	323760	258150	282590	223660	233940	239370	184050	239280	227970	2150	303700	243810	293290
P30048	P30048	2	2	2	Thioredoxin-dependent peroxide reductase, mitochondrial	PRDX3	sp|P30048|PRDX3_HUMAN Thioredoxin-dependent peroxide reductase, mitochondrial OS=Homo sapiens GN=PRDX3 PE=1 SV=3	1	2	2	2	1	2	0	2	1	2	0	2	1	2	0	2	8.2	8.2	8.2	27.692	256	256	0	4.5142	By matching	By MS/MS		By MS/MS	0	41497	31198	35811	48769	42058	31105	29929	51110	28258	0	39014	29758	37535
P30049	P30049	2	2	2	ATP synthase subunit delta, mitochondrial	ATP5D	sp|P30049|ATPD_HUMAN ATP synthase subunit delta, mitochondrial OS=Homo sapiens GN=ATP5D PE=1 SV=2	1	2	2	2	2	2	2	2	2	2	2	2	2	2	2	2	13.7	13.7	13.7	17.49	168	168	0	81.124	By MS/MS	By MS/MS	By MS/MS	By MS/MS	381.33	114130	94075	109290	106570	105290	110440	83939	103910	135580	810.46	107260	89193	113040
P30050	P30050	6	6	6	60S ribosomal protein L12	RPL12	sp|P30050|RL12_HUMAN 60S ribosomal protein L12 OS=Homo sapiens GN=RPL12 PE=1 SV=1	1	6	6	6	4	5	5	5	4	5	5	5	4	5	5	5	38.8	38.8	38.8	17.818	165	165	0	13.413	By MS/MS	By MS/MS	By matching	By MS/MS	1065.3	142990	131920	147440	118640	143370	132270	101430	147450	132650	1680.1	134510	124680	151760
P30153;P30154	P30153;P30154	6;3	6;3	6;3	Serine/threonine-protein phosphatase 2A 65 kDa regulatory subunit A alpha isoform;Serine/threonine-protein phosphatase 2A 65 kDa regulatory subunit A beta isoform	PPP2R1A;PPP2R1B	sp|P30153|2AAA_HUMAN Serine/threonine-protein phosphatase 2A 65 kDa regulatory subunit A alpha isoform OS=Homo sapiens GN=PPP2R1A PE=1 SV=4;sp|P30154|2AAB_HUMAN Serine/threonine-protein phosphatase 2A 65 kDa regulatory subunit A beta isoform OS=Homo sapien	2	6	6	6	4	5	3	6	4	5	3	6	4	5	3	6	14.6	14.6	14.6	65.308	589	589;601	0	39.944	By matching	By MS/MS	By matching	By MS/MS	378.06	75023	73025	92902	65140	69861	66432	54270	98080	72347	548.11	70592	68995	94010
P30536	P30536	1	1	1	Translocator protein	TSPO	sp|P30536|TSPO_HUMAN Translocator protein OS=Homo sapiens GN=TSPO PE=1 SV=3	1	1	1	1	1	1	0	1	1	1	0	1	1	1	0	1	4.7	4.7	4.7	18.828	169	169	0.0040541	1.568	By matching	By MS/MS		By MS/MS	0	1635.7	1548.4	1477.3	1714.6	2019.9	1986.2	1483.7	745.96	1217.6	0	1540.8	1467.1	1550.8
P30825;P52569	P30825;P52569	1;1	1;1	1;1	High affinity cationic amino acid transporter 1;Cationic amino acid transporter 2	SLC7A1;SLC7A2	sp|P30825|CTR1_HUMAN High affinity cationic amino acid transporter 1 OS=Homo sapiens GN=SLC7A1 PE=1 SV=1;sp|P52569|CTR2_HUMAN Cationic amino acid transporter 2 OS=Homo sapiens GN=SLC7A2 PE=1 SV=2	2	1	1	1	0	1	0	1	0	1	0	1	0	1	0	1	2.1	2.1	2.1	67.638	629	629;658	0	2.2494		By MS/MS		By matching	0	2421	2886.8	2795.8	2450.2	3808.6	3014.6	2362.6	4159.8	2608	0	2288.8	2724.7	2886.7
P30837;P00352;P47895;P05091;O94788	P30837;P00352;P47895;P05091;O94788	2;1;1;1;1	2;1;1;1;1	2;1;1;1;1	Aldehyde dehydrogenase X, mitochondrial;Retinal dehydrogenase 1;Aldehyde dehydrogenase family 1 member A3;Aldehyde dehydrogenase, mitochondrial;Retinal dehydrogenase 2	ALDH1B1;ALDH1A1;ALDH1A3;ALDH2;ALDH1A2	sp|P30837|AL1B1_HUMAN Aldehyde dehydrogenase X, mitochondrial OS=Homo sapiens GN=ALDH1B1 PE=1 SV=3;sp|P00352|AL1A1_HUMAN Retinal dehydrogenase 1 OS=Homo sapiens GN=ALDH1A1 PE=1 SV=2;sp|P47895|AL1A3_HUMAN Aldehyde dehydrogenase family 1 member A3 OS=Homo sa	5	2	2	2	0	1	1	2	0	1	1	2	0	1	1	2	4.8	4.8	4.8	57.206	517	517;501;512;517;518	0	9.0345		By MS/MS	By matching	By MS/MS	0	9596.6	9357.6	10174	9913.5	9249.2	9642.4	8028.4	17976	11009	0	9025.7	8859.8	10436
P31040	P31040	6	6	6	Succinate dehydrogenase [ubiquinone] flavoprotein subunit, mitochondrial	SDHA	sp|P31040|SDHA_HUMAN Succinate dehydrogenase [ubiquinone] flavoprotein subunit, mitochondrial OS=Homo sapiens GN=SDHA PE=1 SV=2	1	6	6	6	3	4	3	2	3	4	3	2	3	4	3	2	11	11	11	72.691	664	664	0	17.023	By MS/MS	By MS/MS	By MS/MS	By MS/MS	296.17	61030	52165	60594	59180	65297	62045	52514	63160	66270	443.95	57432	49465	62703
Q86SG5;P31151	Q86SG5;P31151	1;1	1;1	1;1	Protein S100-A7A;Protein S100-A7	S100A7A;S100A7	sp|Q86SG5|S1A7A_HUMAN Protein S100-A7A OS=Homo sapiens GN=S100A7A PE=1 SV=3;sp|P31151|S10A7_HUMAN Protein S100-A7 OS=Homo sapiens GN=S100A7 PE=1 SV=4	2	1	1	1	1	1	1	1	1	1	1	1	1	1	1	1	10.9	10.9	10.9	11.305	101	101;101	0.0075758	1.1975	By matching	By MS/MS	By matching	By matching	165.35	7062.3	8870.3	8866.3	9812.4	10964	12203	7775.4	10418	6790	220.09	6678.3	8415.7	9081.1
P31153;Q00266	P31153	11;1	11;1	11;1	S-adenosylmethionine synthase isoform type-2	MAT2A	sp|P31153|METK2_HUMAN S-adenosylmethionine synthase isoform type-2 OS=Homo sapiens GN=MAT2A PE=1 SV=1	2	11	11	11	6	10	7	10	6	10	7	10	6	10	7	10	27.8	27.8	27.8	43.66	395	395;395	0	74.02	By MS/MS	By MS/MS	By MS/MS	By MS/MS	813.66	333370	308930	335740	242840	270650	240570	206090	289360	264220	1823.1	313100	291370	344630
P31689	P31689	9	9	9	DnaJ homolog subfamily A member 1	DNAJA1	sp|P31689|DNJA1_HUMAN DnaJ homolog subfamily A member 1 OS=Homo sapiens GN=DNAJA1 PE=1 SV=2	1	9	9	9	8	9	9	8	8	9	9	8	8	9	9	8	21.7	21.7	21.7	44.868	397	397	0	28.915	By MS/MS	By MS/MS	By MS/MS	By MS/MS	373.53	150890	130880	160030	168210	163150	161590	125180	142470	180100	638.93	142040	124360	164620
P31930;O75439	P31930	9;1	9;1	9;1	Cytochrome b-c1 complex subunit 1, mitochondrial	UQCRC1	sp|P31930|QCR1_HUMAN Cytochrome b-c1 complex subunit 1, mitochondrial OS=Homo sapiens GN=UQCRC1 PE=1 SV=3	2	9	9	9	6	6	8	6	6	6	8	6	6	6	8	6	22.3	22.3	22.3	52.645	480	480;489	0	88.273	By MS/MS	By MS/MS	By MS/MS	By MS/MS	198.66	161660	122430	138170	162630	158080	147310	123890	145810	161870	332.74	151940	116390	144820
P31943;P31942	P31943	18;1	18;1	10;0	Heterogeneous nuclear ribonucleoprotein H;Heterogeneous nuclear ribonucleoprotein H, N-terminally processed	HNRNPH1	sp|P31943|HNRH1_HUMAN Heterogeneous nuclear ribonucleoprotein H OS=Homo sapiens GN=HNRNPH1 PE=1 SV=4	2	18	18	10	13	18	13	18	13	18	13	18	5	10	6	10	48.3	48.3	28.5	49.229	449	449;346	0	323.31	By MS/MS	By MS/MS	By MS/MS	By MS/MS	1790.4	896160	736950	795100	726970	730510	734130	565450	805010	773790	3631.3	841270	697120	826110
P31946	P31946	4	1	1	14-3-3 protein beta/alpha;14-3-3 protein beta/alpha, N-terminally processed	YWHAB	sp|P31946|1433B_HUMAN 14-3-3 protein beta/alpha OS=Homo sapiens GN=YWHAB PE=1 SV=3	1	4	1	1	4	4	3	4	1	1	0	1	1	1	0	1	15.4	5.7	5.7	28.082	246	246	0	6.6807	By MS/MS	By MS/MS	By matching	By MS/MS	0	17021	8684.3	11490	8657.6	9741.2	10074	10058	11375	11045	0	15934	8214.7	12204
P31947	P31947	3	1	1	14-3-3 protein sigma	SFN	sp|P31947|1433S_HUMAN 14-3-3 protein sigma OS=Homo sapiens GN=SFN PE=1 SV=1	1	3	1	1	3	3	3	3	1	1	1	1	1	1	1	1	9.3	3.2	3.2	27.774	248	248	0	4.8612	By matching	By MS/MS	By matching	By MS/MS	317.91	44403	47895	55100	42516	47996	46197	34017	59535	46378	653.09	41830	45254	55927
P31949	P31949	1	1	1	Protein S100-A11;Protein S100-A11, N-terminally processed	S100A11	sp|P31949|S10AB_HUMAN Protein S100-A11 OS=Homo sapiens GN=S100A11 PE=1 SV=2	1	1	1	1	0	1	0	1	0	1	0	1	0	1	0	1	8.6	8.6	8.6	11.74	105	105	0.0075188	1.1779		By matching		By MS/MS	0	9624.3	9843.7	11290	9365	10505	8515.1	7089.7	13495	10798	0	9065	9305.1	11515
P32119	P32119	8	7	7	Peroxiredoxin-2	PRDX2	sp|P32119|PRDX2_HUMAN Peroxiredoxin-2 OS=Homo sapiens GN=PRDX2 PE=1 SV=5	1	8	7	7	6	8	7	6	5	7	6	5	5	7	6	5	40.4	34.8	34.8	21.892	198	198	0	22.389	By MS/MS	By MS/MS	By MS/MS	By MS/MS	1336.5	291760	251100	295950	253280	269180	279250	204520	253800	273380	2632.1	274260	237660	304460
P32969	P32969	1	1	1	60S ribosomal protein L9	RPL9	sp|P32969|RL9_HUMAN 60S ribosomal protein L9 OS=Homo sapiens GN=RPL9 PE=1 SV=1	1	1	1	1	0	1	0	1	0	1	0	1	0	1	0	1	9.9	9.9	9.9	21.863	192	192	0	14.874		By MS/MS		By MS/MS	150.91	9243.8	10140	10371	7843.8	8544.8	8666	7705	12271	10101	166.88	8693.3	9570.6	10576
P33240	P33240	1	1	1	Cleavage stimulation factor subunit 2	CSTF2	sp|P33240|CSTF2_HUMAN Cleavage stimulation factor subunit 2 OS=Homo sapiens GN=CSTF2 PE=1 SV=1	1	1	1	1	1	1	1	0	1	1	1	0	1	1	1	0	1.9	1.9	1.9	60.959	577	577	0.0040377	1.5454	By MS/MS	By matching	By matching		0	4459.3	2369.6	3074.9	2653.1	3491.1	3429.7	2776.3	1828.4	4163	0	4181.8	2245.6	3282.9
P33992	P33992	1	1	1	DNA replication licensing factor MCM5	MCM5	sp|P33992|MCM5_HUMAN DNA replication licensing factor MCM5 OS=Homo sapiens GN=MCM5 PE=1 SV=5	1	1	1	1	0	1	0	0	0	1	0	0	0	1	0	0	2	2	2	82.285	734	734	0.0039788	1.443		By MS/MS			0	0	0	0	0	0	0	0	0	0	0	0	0	0
P33993	P33993	2	2	2	DNA replication licensing factor MCM7	MCM7	sp|P33993|MCM7_HUMAN DNA replication licensing factor MCM7 OS=Homo sapiens GN=MCM7 PE=1 SV=4	1	2	2	2	2	2	2	1	2	2	2	1	2	2	2	1	3.9	3.9	3.9	81.307	719	719	0	7.3596	By matching	By MS/MS	By matching	By MS/MS	53.322	14758	14847	16777	13157	13609	13941	9956.7	16737	11941	131.52	13880	14025	17089
P35030	P35030	1	1	1	Trypsin-3	PRSS3	sp|P35030|TRY3_HUMAN Trypsin-3 OS=Homo sapiens GN=PRSS3 PE=1 SV=2	1	1	1	1	1	1	1	1	1	1	1	1	1	1	1	1	4.3	4.3	4.3	32.528	304	304	0	93.971	By MS/MS	By MS/MS	By MS/MS	By MS/MS	104.93	130000	73457	161510	168850	157710	189970	124680	168730	177620	169.31	122590	70832	164390
P35232	P35232	14	14	14	Prohibitin	PHB	sp|P35232|PHB_HUMAN Prohibitin OS=Homo sapiens GN=PHB PE=1 SV=1	1	14	14	14	9	9	12	13	9	9	12	13	9	9	12	13	59.6	59.6	59.6	29.804	272	272	0	105.58	By MS/MS	By MS/MS	By MS/MS	By MS/MS	1153	450770	976250	438560	428710	438230	467420	331140	428090	509540	3409.3	423840	915340	453540
P35573	P35573	2	2	2	Glycogen debranching enzyme;4-alpha-glucanotransferase;Amylo-alpha-1,6-glucosidase	AGL	sp|P35573|GDE_HUMAN Glycogen debranching enzyme OS=Homo sapiens GN=AGL PE=1 SV=3	1	2	2	2	0	1	0	2	0	1	0	2	0	1	0	2	1.6	1.6	1.6	174.76	1532	1532	0	3.8128		By matching		By MS/MS	0	8209.7	7697.9	8826.5	4383.1	4576.8	4524.4	5379.5	7148.9	13240	0	7697	7235.6	8952.5
P35579;REV__Q9UKV3	P35579	56;1	56;1	43;1	Myosin-9	MYH9	sp|P35579|MYH9_HUMAN Myosin-9 OS=Homo sapiens GN=MYH9 PE=1 SV=4	2	56	56	43	44	37	40	49	44	37	40	49	34	26	29	36	30.8	30.8	24.5	226.53	1960	1960;1341	0	234.78	By MS/MS	By MS/MS	By MS/MS	By MS/MS	8476.2	1254500	1123500	1394200	1330500	1312100	1242400	1242500	1469100	1609000	13189	1180900	1066200	1427000
P35580	P35580	53	43	40	Myosin-10	MYH10	sp|P35580|MYH10_HUMAN Myosin-10 OS=Homo sapiens GN=MYH10 PE=1 SV=3	1	53	43	40	36	44	41	50	29	36	32	40	27	33	30	38	28.3	23.9	22.1	229	1976	1976	0	169.82	By MS/MS	By MS/MS	By MS/MS	By MS/MS	4226	948260	894380	1056400	1083500	1004200	952080	948030	1224500	1237800	7270.8	892710	849000	1081400
P35606	P35606	2	2	2	Coatomer subunit beta	COPB2	sp|P35606|COPB2_HUMAN Coatomer subunit beta OS=Homo sapiens GN=COPB2 PE=1 SV=2	1	2	2	2	1	2	2	2	1	2	2	2	1	2	2	2	1.9	1.9	1.9	102.49	906	906	0	3.1345	By MS/MS	By matching	By MS/MS	By matching	101.92	25347	19698	24110	39882	27012	31767	21333	23571	34307	161.27	23848	18923	25052
P35613	P35613	5	5	5	Basigin	BSG	sp|P35613|BASI_HUMAN Basigin OS=Homo sapiens GN=BSG PE=1 SV=2	1	5	5	5	5	5	5	5	5	5	5	5	5	5	5	5	16.9	16.9	16.9	42.2	385	385	0	31.16	By MS/MS	By MS/MS	By MS/MS	By MS/MS	381.46	224560	228870	257680	315070	272430	268560	207590	272160	271500	1134.5	211690	217730	264040
P35998	P35998	8	8	8	26S protease regulatory subunit 7	PSMC2	sp|P35998|PRS7_HUMAN 26S proteasome regulatory subunit 7 OS=Homo sapiens GN=PSMC2 PE=1 SV=3	1	8	8	8	0	7	2	7	0	7	2	7	0	7	2	7	18.2	18.2	18.2	48.633	433	433	0	19.705		By MS/MS	By matching	By MS/MS	562.31	130670	120110	130060	113020	127510	113590	94841	165650	122590	994.22	122880	113560	134220
P36542	P36542	8	8	8	ATP synthase subunit gamma, mitochondrial	ATP5C1	sp|P36542|ATPG_HUMAN ATP synthase subunit gamma, mitochondrial OS=Homo sapiens GN=ATP5C1 PE=1 SV=1	1	8	8	8	7	8	6	7	7	8	6	7	7	8	6	7	30.2	30.2	30.2	32.996	298	298	0	25.655	By MS/MS	By MS/MS	By MS/MS	By MS/MS	618.18	168480	181350	214550	243710	231640	245210	190350	199230	260780	1057.9	159110	172470	218670
P36578	P36578	16	16	15	60S ribosomal protein L4	RPL4	sp|P36578|RL4_HUMAN 60S ribosomal protein L4 OS=Homo sapiens GN=RPL4 PE=1 SV=5	1	16	16	15	9	15	5	15	9	15	5	15	9	15	5	15	43.8	43.8	43.8	47.697	427	427	0	101	By MS/MS	By MS/MS	By MS/MS	By MS/MS	946.97	310310	291090	307660	267700	300870	285990	198620	329460	239340	1726.7	291780	275100	317570
P36957	P36957	1	1	1	Dihydrolipoyllysine-residue succinyltransferase component of 2-oxoglutarate dehydrogenase complex, mitochondrial	DLST	sp|P36957|ODO2_HUMAN Dihydrolipoyllysine-residue succinyltransferase component of 2-oxoglutarate dehydrogenase complex, mitochondrial OS=Homo sapiens GN=DLST PE=1 SV=4	1	1	1	1	1	1	1	1	1	1	1	1	1	1	1	1	1.8	1.8	1.8	48.755	453	453	0.004	1.491	By MS/MS	By MS/MS	By matching	By MS/MS	0	38240	26814	31643	24917	30714	33135	28289	29757	33471	0	35886	25339	33103
P37802	P37802	2	2	2	Transgelin-2	TAGLN2	sp|P37802|TAGL2_HUMAN Transgelin-2 OS=Homo sapiens GN=TAGLN2 PE=1 SV=3	1	2	2	2	2	0	0	0	2	0	0	0	2	0	0	0	8.5	8.5	8.5	22.391	199	199	0	2.6396	By MS/MS				0	0	0	0	0	0	0	0	0	0	0	0	0	0
Q96E39;P38159;O75526;Q8IZ40	Q96E39;P38159	3;3;1;1	3;3;1;1	3;3;1;1	RNA binding motif protein, X-linked-like-1;RNA-binding motif protein, X chromosome;RNA-binding motif protein, X chromosome, N-terminally processed	RBMXL1;RBMX	sp|Q96E39|RMXL1_HUMAN RNA binding motif protein, X-linked-like-1 OS=Homo sapiens GN=RBMXL1 PE=1 SV=1;sp|P38159|RBMX_HUMAN RNA-binding motif protein, X chromosome OS=Homo sapiens GN=RBMX PE=1 SV=3	4	3	3	3	3	3	3	3	3	3	3	3	3	3	3	3	7.2	7.2	7.2	42.141	390	390;391;392;523	0	6.5532	By matching	By MS/MS	By matching	By MS/MS	43.792	34649	33652	38841	28328	29623	30799	26000	45201	35998	128.67	32567	31762	39547
P38646	P38646	23	22	22	Stress-70 protein, mitochondrial	HSPA9	sp|P38646|GRP75_HUMAN Stress-70 protein, mitochondrial OS=Homo sapiens GN=HSPA9 PE=1 SV=2	1	23	22	22	18	20	18	19	17	19	17	18	17	19	17	18	39.6	39.6	39.6	73.68	679	679	0	182.28	By MS/MS	By MS/MS	By MS/MS	By MS/MS	3262.5	758330	602290	689330	634170	670220	704220	528640	643590	726620	4961.2	712340	570430	715890
P38919	P38919	18	18	17	Eukaryotic initiation factor 4A-III;Eukaryotic initiation factor 4A-III, N-terminally processed	EIF4A3	sp|P38919|IF4A3_HUMAN Eukaryotic initiation factor 4A-III OS=Homo sapiens GN=EIF4A3 PE=1 SV=4	1	18	18	17	5	18	4	17	5	18	4	17	5	17	4	16	46.2	46.2	42.3	46.871	411	411	0	92.364	By matching	By MS/MS	By matching	By MS/MS	853.36	292890	271850	287710	189130	242730	201550	183030	299750	197470	1612.7	275080	256050	296130
P39019	P39019	6	6	6	40S ribosomal protein S19	RPS19	sp|P39019|RS19_HUMAN 40S ribosomal protein S19 OS=Homo sapiens GN=RPS19 PE=1 SV=2	1	6	6	6	4	6	1	6	4	6	1	6	4	6	1	6	30.3	30.3	30.3	16.06	145	145	0	26.259	By matching	By MS/MS	By matching	By MS/MS	672.98	209360	184930	195620	170490	191480	169110	127200	222080	160370	1787.3	196730	174780	202780
P39023;Q92901	P39023	15;2	15;2	15;2	60S ribosomal protein L3	RPL3	sp|P39023|RL3_HUMAN 60S ribosomal protein L3 OS=Homo sapiens GN=RPL3 PE=1 SV=2	2	15	15	15	8	15	9	15	8	15	9	15	8	15	9	15	37.5	37.5	37.5	46.108	403	403;407	0	108.19	By MS/MS	By MS/MS	By MS/MS	By MS/MS	1042.8	372280	338290	359030	380500	438150	357110	297320	428680	359030	2403.7	350590	320680	373660
P39656	P39656	6	6	6	Dolichyl-diphosphooligosaccharide--protein glycosyltransferase 48 kDa subunit	DDOST	sp|P39656|OST48_HUMAN Dolichyl-diphosphooligosaccharide--protein glycosyltransferase 48 kDa subunit OS=Homo sapiens GN=DDOST PE=1 SV=4	1	6	6	6	4	4	4	6	4	4	4	6	4	4	4	6	12.5	12.5	12.5	50.8	456	456	0	16.195	By MS/MS	By MS/MS	By MS/MS	By MS/MS	831.41	208570	166200	193330	226800	196830	193130	151630	216980	238670	1557.3	196020	158130	200730
P39687	P39687	1	1	1	Acidic leucine-rich nuclear phosphoprotein 32 family member A	ANP32A	sp|P39687|AN32A_HUMAN Acidic leucine-rich nuclear phosphoprotein 32 family member A OS=Homo sapiens GN=ANP32A PE=1 SV=1	1	1	1	1	1	1	0	1	1	1	0	1	1	1	0	1	3.2	3.2	3.2	28.585	249	249	0.0075282	1.1805	By MS/MS	By matching		By matching	0	21960	6346.1	8779.8	6174.4	6917	9076	7687.8	3133.5	8252.1	0	20493	6000.8	9943.3
P40227	P40227	8	8	8	T-complex protein 1 subunit zeta	CCT6A	sp|P40227|TCPZ_HUMAN T-complex protein 1 subunit zeta OS=Homo sapiens GN=CCT6A PE=1 SV=3	1	8	8	8	5	8	3	6	5	8	3	6	5	8	3	6	16.2	16.2	16.2	58.024	531	531	0	59.125	By matching	By MS/MS	By MS/MS	By MS/MS	520.3	122760	133600	151080	151860	144600	165070	102840	166330	140550	1023.3	115730	126670	153770
P40429;Q6NVV1	P40429	10;4	10;4	10;4	60S ribosomal protein L13a	RPL13A	sp|P40429|RL13A_HUMAN 60S ribosomal protein L13a OS=Homo sapiens GN=RPL13A PE=1 SV=2	2	10	10	10	4	9	5	10	4	9	5	10	4	9	5	10	35.5	35.5	35.5	23.577	203	203;102	0	42.857	By MS/MS	By MS/MS	By matching	By MS/MS	1219	238190	224410	242340	195310	244260	236110	172950	235990	210020	2013.5	224100	211960	249910
P40763	P40763	1	1	1	Signal transducer and activator of transcription 3	STAT3	sp|P40763|STAT3_HUMAN Signal transducer and activator of transcription 3 OS=Homo sapiens GN=STAT3 PE=1 SV=2	1	1	1	1	1	1	0	1	1	1	0	1	1	1	0	1	1.7	1.7	1.7	88.067	770	770	0	2.4257	By matching	By MS/MS		By MS/MS	0	8641.2	9102.1	9740.1	7745.3	7546.4	7957.4	6172.7	11253	7178	0	8123.5	8591.3	9917
P40939	P40939	2	2	2	Trifunctional enzyme subunit alpha, mitochondrial;Long-chain enoyl-CoA hydratase;Long chain 3-hydroxyacyl-CoA dehydrogenase	HADHA	sp|P40939|ECHA_HUMAN Trifunctional enzyme subunit alpha, mitochondrial OS=Homo sapiens GN=HADHA PE=1 SV=2	1	2	2	2	1	2	1	2	1	2	1	2	1	2	1	2	4.6	4.6	4.6	82.999	763	763	0	9.6178	By MS/MS	By MS/MS	By matching	By matching	99.861	12967	13693	16087	13560	20322	15329	16326	15771	17945	154.99	12262	12958	16499
P41252	P41252	5	5	5	Isoleucine--tRNA ligase, cytoplasmic	IARS	sp|P41252|SYIC_HUMAN Isoleucine--tRNA ligase, cytoplasmic OS=Homo sapiens GN=IARS PE=1 SV=2	1	5	5	5	3	5	0	5	3	5	0	5	3	5	0	5	4.4	4.4	4.4	144.5	1262	1262	0	10.242	By matching	By MS/MS		By MS/MS	173.78	57995	49871	54034	43279	48821	49526	36532	61608	44756	213.17	54465	47096	55914
P42167;P42166	P42167;P42166	9;7	9;7	9;7	Lamina-associated polypeptide 2, isoforms beta/gamma;Thymopoietin;Thymopentin;Lamina-associated polypeptide 2, isoform alpha;Thymopoietin;Thymopentin	TMPO	sp|P42167|LAP2B_HUMAN Lamina-associated polypeptide 2, isoforms beta/gamma OS=Homo sapiens GN=TMPO PE=1 SV=2;sp|P42166|LAP2A_HUMAN Lamina-associated polypeptide 2, isoform alpha OS=Homo sapiens GN=TMPO PE=1 SV=2	2	9	9	9	4	9	7	9	4	9	7	9	4	9	7	9	27.1	27.1	27.1	50.67	454	454;694	0	159.34	By MS/MS	By MS/MS	By MS/MS	By MS/MS	632.67	228340	186720	200210	193480	184520	177600	136610	212580	181310	922.42	214340	176770	208220
P42677;Q71UM5	P42677	3;1	3;1	3;1	40S ribosomal protein S27	RPS27	sp|P42677|RS27_HUMAN 40S ribosomal protein S27 OS=Homo sapiens GN=RPS27 PE=1 SV=3	2	3	3	3	2	3	3	3	2	3	3	3	2	3	3	3	25	25	25	9.461	84	84;84	0	11.797	By MS/MS	By MS/MS	By MS/MS	By MS/MS	174.61	75364	61782	68074	94797	87931	80633	68120	87119	97544	336.09	70950	58918	71318
P42704	P42704	7	7	7	Leucine-rich PPR motif-containing protein, mitochondrial	LRPPRC	sp|P42704|LPPRC_HUMAN Leucine-rich PPR motif-containing protein, mitochondrial OS=Homo sapiens GN=LRPPRC PE=1 SV=3	1	7	7	7	4	7	3	7	4	7	3	7	4	7	3	7	4.9	4.9	4.9	157.9	1394	1394	0	9.6174	By matching	By MS/MS	By matching	By MS/MS	379.3	71338	66010	70050	57054	66313	58408	46113	83558	63968	674.48	67055	62344	72296
P42766	P42766	5	5	5	60S ribosomal protein L35	RPL35	sp|P42766|RL35_HUMAN 60S ribosomal protein L35 OS=Homo sapiens GN=RPL35 PE=1 SV=2	1	5	5	5	2	4	3	5	2	4	3	5	2	4	3	5	36.6	36.6	36.6	14.551	123	123	0	79.582	By matching	By MS/MS	By MS/MS	By MS/MS	736.13	187960	223160	208950	222160	226620	208680	161150	233860	207450	1785.5	177150	211140	214680
P43243	P43243	10	10	10	Matrin-3	MATR3	sp|P43243|MATR3_HUMAN Matrin-3 OS=Homo sapiens GN=MATR3 PE=1 SV=2	1	10	10	10	3	8	1	10	3	8	1	10	3	8	1	10	16.1	16.1	16.1	94.622	847	847	0	40.213	By matching	By MS/MS	By matching	By MS/MS	608.91	154100	140990	152190	130690	149200	137510	113120	191770	142720	915.91	144900	133270	157150
P43307	P43307	1	1	1	Translocon-associated protein subunit alpha	SSR1	sp|P43307|SSRA_HUMAN Translocon-associated protein subunit alpha OS=Homo sapiens GN=SSR1 PE=1 SV=3	1	1	1	1	1	1	1	1	1	1	1	1	1	1	1	1	2.8	2.8	2.8	32.235	286	286	0.0073983	1.1476	By matching	By MS/MS	By matching	By MS/MS	78.915	40279	37689	40109	35430	41182	40705	30886	56834	44325	261.93	37890	35626	41442
P43490	P43490	13	13	13	Nicotinamide phosphoribosyltransferase	NAMPT	sp|P43490|NAMPT_HUMAN Nicotinamide phosphoribosyltransferase OS=Homo sapiens GN=NAMPT PE=1 SV=1	1	13	13	13	7	13	5	12	7	13	5	12	7	13	5	12	33.8	33.8	33.8	55.52	491	491	0	84.369	By MS/MS	By MS/MS	By MS/MS	By MS/MS	659.22	312480	303670	340960	308370	323670	318840	253710	407680	346940	1395.3	294100	287380	349460
P43686	P43686	15	15	15	26S protease regulatory subunit 6B	PSMC4	sp|P43686|PRS6B_HUMAN 26S proteasome regulatory subunit 6B OS=Homo sapiens GN=PSMC4 PE=1 SV=2	1	15	15	15	8	15	10	12	8	15	10	12	8	15	10	12	36.6	36.6	36.6	47.366	418	418	0	80.125	By MS/MS	By MS/MS	By MS/MS	By MS/MS	780.42	224870	209810	224710	241450	253970	241220	199050	304690	235960	1186.5	211720	198970	232750
P45880	P45880	8	8	8	Voltage-dependent anion-selective channel protein 2	VDAC2	sp|P45880|VDAC2_HUMAN Voltage-dependent anion-selective channel protein 2 OS=Homo sapiens GN=VDAC2 PE=1 SV=2	1	8	8	8	6	7	6	8	6	7	6	8	6	7	6	8	32.3	32.3	32.3	31.566	294	294	0	63.094	By MS/MS	By MS/MS	By MS/MS	By MS/MS	1284.6	330670	342920	357450	370880	401760	403630	268100	412650	376360	2497.1	311650	324870	368270
P46019	P46019	14	13	13	Phosphorylase b kinase regulatory subunit alpha, liver isoform	PHKA2	sp|P46019|KPB2_HUMAN Phosphorylase b kinase regulatory subunit alpha, liver isoform OS=Homo sapiens GN=PHKA2 PE=1 SV=1	1	14	13	13	11	14	12	9	10	13	11	9	10	13	11	9	13.3	12.5	12.5	138.41	1235	1235	0	34.997	By MS/MS	By MS/MS	By MS/MS	By MS/MS	1588.6	274940	241600	291900	291070	251390	260830	215260	218430	277600	2742.4	258480	229350	299010
P46020	P46020	18	18	17	Phosphorylase b kinase regulatory subunit alpha, skeletal muscle isoform	PHKA1	sp|P46020|KPB1_HUMAN Phosphorylase b kinase regulatory subunit alpha, skeletal muscle isoform OS=Homo sapiens GN=PHKA1 PE=1 SV=2	1	18	18	17	12	18	16	11	12	18	16	11	11	17	15	11	14	14	13.2	137.31	1223	1223	0	53.54	By MS/MS	By MS/MS	By MS/MS	By MS/MS	1747.6	539150	540250	603960	522370	478930	472930	373450	395520	526420	3325.7	506890	510930	615460
P46459	P46459	2	2	2	Vesicle-fusing ATPase	NSF	sp|P46459|NSF_HUMAN Vesicle-fusing ATPase OS=Homo sapiens GN=NSF PE=1 SV=3	1	2	2	2	0	1	0	2	0	1	0	2	0	1	0	2	3.2	3.2	3.2	82.593	744	744	0	5.2605		By MS/MS		By MS/MS	0	9260.9	8445.4	10124	8356.8	9097.9	9188.4	6345.3	11490	8535.6	0	8712.4	7987.9	10361
P46776	P46776	5	5	5	60S ribosomal protein L27a	RPL27A	sp|P46776|RL27A_HUMAN 60S ribosomal protein L27a OS=Homo sapiens GN=RPL27A PE=1 SV=2	1	5	5	5	4	5	5	5	4	5	5	5	4	5	5	5	31.1	31.1	31.1	16.561	148	148	0	29.496	By MS/MS	By MS/MS	By MS/MS	By MS/MS	443.49	182220	127320	140290	140930	143630	145380	102200	132400	147030	594.79	170950	120660	147870
P46777	P46777	8	8	8	60S ribosomal protein L5	RPL5	sp|P46777|RL5_HUMAN 60S ribosomal protein L5 OS=Homo sapiens GN=RPL5 PE=1 SV=3	1	8	8	8	4	8	1	8	4	8	1	8	4	8	1	8	29.3	29.3	29.3	34.362	297	297	0	28.311	By matching	By MS/MS	By matching	By MS/MS	445.28	148190	134270	127500	113860	158390	114360	113150	153780	110270	984.31	139380	126760	133910
P46778	P46778	7	7	7	60S ribosomal protein L21	RPL21	sp|P46778|RL21_HUMAN 60S ribosomal protein L21 OS=Homo sapiens GN=RPL21 PE=1 SV=2	1	7	7	7	3	7	3	7	3	7	3	7	3	7	3	7	31.9	31.9	31.9	18.565	160	160	0	14.526	By matching	By MS/MS	By matching	By MS/MS	390.24	185870	203560	212640	164750	197010	190440	134890	217860	160450	1321.9	175010	192040	217180
P46779	P46779	8	8	8	60S ribosomal protein L28	RPL28	sp|P46779|RL28_HUMAN 60S ribosomal protein L28 OS=Homo sapiens GN=RPL28 PE=1 SV=3	1	8	8	8	6	8	6	8	6	8	6	8	6	8	6	8	40.1	40.1	40.1	15.747	137	137	0	18.19	By MS/MS	By MS/MS	By MS/MS	By MS/MS	365.73	221500	189790	218780	205260	248710	232610	167450	238800	225460	755.7	208530	179780	226830
P46781	P46781	19	19	19	40S ribosomal protein S9	RPS9	sp|P46781|RS9_HUMAN 40S ribosomal protein S9 OS=Homo sapiens GN=RPS9 PE=1 SV=3	1	19	19	19	8	18	10	16	8	18	10	16	8	18	10	16	66	66	66	22.591	194	194	0	52.114	By MS/MS	By MS/MS	By MS/MS	By MS/MS	1860.7	374110	385470	400980	366440	382110	372590	256900	405740	332340	2955.8	352030	364500	411490
P46782	P46782	6	6	6	40S ribosomal protein S5;40S ribosomal protein S5, N-terminally processed	RPS5	sp|P46782|RS5_HUMAN 40S ribosomal protein S5 OS=Homo sapiens GN=RPS5 PE=1 SV=4	1	6	6	6	6	6	6	6	6	6	6	6	6	6	6	6	22.5	22.5	22.5	22.876	204	204	0	16.707	By MS/MS	By MS/MS	By MS/MS	By MS/MS	350.62	142890	106460	116940	132500	129290	117430	89577	118170	112120	580.7	134200	101090	122880
P46783;Q9NQ39	P46783	5;2	5;2	5;2	40S ribosomal protein S10	RPS10	sp|P46783|RS10_HUMAN 40S ribosomal protein S10 OS=Homo sapiens GN=RPS10 PE=1 SV=1	2	5	5	5	4	4	1	5	4	4	1	5	4	4	1	5	31.5	31.5	31.5	18.898	165	165;176	0	16.614	By MS/MS	By MS/MS	By matching	By MS/MS	393.48	114740	91238	106460	74396	86990	81184	57739	94083	72956	860.42	107680	86100	109950
P46821	P46821	1	1	1	Microtubule-associated protein 1B;MAP1B heavy chain;MAP1 light chain LC1	MAP1B	sp|P46821|MAP1B_HUMAN Microtubule-associated protein 1B OS=Homo sapiens GN=MAP1B PE=1 SV=2	1	1	1	1	1	1	0	1	1	1	0	1	1	1	0	1	0.5	0.5	0.5	270.63	2468	2468	0	1.9942	By matching	By MS/MS		By matching	0	3440.8	3356.3	2973.2	3289.6	4187.4	2899.1	3301.8	4493.1	1622.5	0	3240.1	3174	3134.7
P46977	P46977	3	3	3	Dolichyl-diphosphooligosaccharide--protein glycosyltransferase subunit STT3A	STT3A	sp|P46977|STT3A_HUMAN Dolichyl-diphosphooligosaccharide--protein glycosyltransferase subunit STT3A OS=Homo sapiens GN=STT3A PE=1 SV=2	1	3	3	3	2	3	2	2	2	3	2	2	2	3	2	2	3.3	3.3	3.3	80.529	705	705	0	3.6892	By MS/MS	By MS/MS	By MS/MS	By MS/MS	178.16	55857	51081	54727	54240	56890	53904	44877	71344	60894	219.83	52540	48378	56628
P47897	P47897	3	3	3	Glutamine--tRNA ligase	QARS	sp|P47897|SYQ_HUMAN Glutamine--tRNA ligase OS=Homo sapiens GN=QARS PE=1 SV=1	1	3	3	3	0	3	0	2	0	3	0	2	0	3	0	2	4.5	4.5	4.5	87.798	775	775	0	10.396		By MS/MS		By MS/MS	138.85	20255	18196	23496	16593	18875	17864	12269	23254	18152	161.78	19053	17200	23899
P47914	P47914	4	4	4	60S ribosomal protein L29	RPL29	sp|P47914|RL29_HUMAN 60S ribosomal protein L29 OS=Homo sapiens GN=RPL29 PE=1 SV=2	1	4	4	4	3	3	2	4	3	3	2	4	3	3	2	4	25.2	25.2	25.2	17.752	159	159	0	16.564	By MS/MS	By MS/MS	By MS/MS	By MS/MS	238.19	151850	124800	132930	123560	145930	150200	107010	145850	135290	593.92	142710	118060	138900
P48047	P48047	7	7	7	ATP synthase subunit O, mitochondrial	ATP5O	sp|P48047|ATPO_HUMAN ATP synthase subunit O, mitochondrial OS=Homo sapiens GN=ATP5O PE=1 SV=1	1	7	7	7	4	2	7	3	4	2	7	3	4	2	7	3	39.4	39.4	39.4	23.277	213	213	0	35.982	By MS/MS	By MS/MS	By MS/MS	By MS/MS	1348.6	133250	118480	141230	234390	155860	198770	123040	135990	191770	1782.6	125530	113790	145610
P48444	P48444	1	1	1	Coatomer subunit delta	ARCN1	sp|P48444|COPD_HUMAN Coatomer subunit delta OS=Homo sapiens GN=ARCN1 PE=1 SV=1	1	1	1	1	0	1	0	0	0	1	0	0	0	1	0	0	2.5	2.5	2.5	57.21	511	511	0	2.1804		By MS/MS			0	0	0	0	0	0	0	0	0	0	0	0	0	0
P48556	P48556	3	3	3	26S proteasome non-ATPase regulatory subunit 8	PSMD8	sp|P48556|PSMD8_HUMAN 26S proteasome non-ATPase regulatory subunit 8 OS=Homo sapiens GN=PSMD8 PE=1 SV=2	1	3	3	3	0	2	0	3	0	2	0	3	0	2	0	3	9.1	9.1	9.1	39.611	350	350	0	7.1368		By matching		By MS/MS	0	48687	44250	49410	34914	37991	37504	28335	56678	48274	0	45716	41729	50643
P48643	P48643	31	31	31	T-complex protein 1 subunit epsilon	CCT5	sp|P48643|TCPE_HUMAN T-complex protein 1 subunit epsilon OS=Homo sapiens GN=CCT5 PE=1 SV=1	1	31	31	31	22	30	20	30	22	30	20	30	22	30	20	30	67.1	67.1	67.1	59.67	541	541	0	137.33	By MS/MS	By MS/MS	By MS/MS	By MS/MS	2849.1	899860	977940	1094300	943610	1074700	1056100	857180	1246000	1068200	6229.7	848390	924810	1115200
P49006	P49006	2	2	2	MARCKS-related protein	MARCKSL1	sp|P49006|MRP_HUMAN MARCKS-related protein OS=Homo sapiens GN=MARCKSL1 PE=1 SV=2	1	2	2	2	2	1	2	1	2	1	2	1	2	1	2	1	14.4	14.4	14.4	19.529	195	195	0	9.3905	By MS/MS	By matching	By MS/MS	By matching	171.58	17409	10944	16992	13870	18053	17946	17011	10886	21960	224.9	16378	10406	17598
P49207	P49207	5	5	5	60S ribosomal protein L34	RPL34	sp|P49207|RL34_HUMAN 60S ribosomal protein L34 OS=Homo sapiens GN=RPL34 PE=1 SV=3	1	5	5	5	4	5	4	5	4	5	4	5	4	5	4	5	29.1	29.1	29.1	13.293	117	117	0	37.362	By MS/MS	By MS/MS	By MS/MS	By MS/MS	969.94	263870	240760	258320	241580	266750	266120	184490	284780	253340	1981.3	248180	227830	267260
P49257	P49257	2	2	2	Protein ERGIC-53	LMAN1	sp|P49257|LMAN1_HUMAN Protein ERGIC-53 OS=Homo sapiens GN=LMAN1 PE=1 SV=2	1	2	2	2	1	2	2	2	1	2	2	2	1	2	2	2	2.9	2.9	2.9	57.548	510	510	0	2.7924	By MS/MS	By MS/MS	By matching	By MS/MS	289.81	38185	28052	33377	30319	35844	32231	30214	28004	32699	332.99	35880	26588	34859
P49327	P49327	2	2	2	Fatty acid synthase;[Acyl-carrier-protein] S-acetyltransferase;[Acyl-carrier-protein] S-malonyltransferase;3-oxoacyl-[acyl-carrier-protein] synthase;3-oxoacyl-[acyl-carrier-protein] reductase;3-hydroxyacyl-[acyl-carrier-protein] dehydratase;Enoyl-[acyl-carrier-protein] reductase;Oleoyl-[acyl-carrier-protein] hydrolase	FASN	sp|P49327|FAS_HUMAN Fatty acid synthase OS=Homo sapiens GN=FASN PE=1 SV=3	1	2	2	2	0	2	0	1	0	2	0	1	0	2	0	1	1	1	1	273.42	2511	2511	0	8.3613		By MS/MS		By matching	0	3315.6	4527.7	4411.3	3610.7	5462.1	4242.6	3270.7	5316.6	2992.6	0	3138.6	4270.2	4504.4
P49368	P49368	18	18	18	T-complex protein 1 subunit gamma	CCT3	sp|P49368|TCPG_HUMAN T-complex protein 1 subunit gamma OS=Homo sapiens GN=CCT3 PE=1 SV=4	1	18	18	18	6	15	5	17	6	15	5	17	6	15	5	17	39.4	39.4	39.4	60.533	545	545	0	56.051	By MS/MS	By MS/MS	By matching	By MS/MS	879.37	289750	268800	279630	243520	282950	251760	218530	351420	268490	1585.4	272440	253980	289450
P49411	P49411	21	21	21	Elongation factor Tu, mitochondrial	TUFM	sp|P49411|EFTU_HUMAN Elongation factor Tu, mitochondrial OS=Homo sapiens GN=TUFM PE=1 SV=2	1	21	21	21	17	18	16	18	17	18	16	18	17	18	16	18	52.2	52.2	52.2	49.541	452	452	0	216.47	By MS/MS	By MS/MS	By MS/MS	By MS/MS	2119.7	793500	706220	824860	801330	768320	793680	631460	819700	882340	3908.2	746260	669540	847690
P49458	P49458	1	1	1	Signal recognition particle 9 kDa protein	SRP9	sp|P49458|SRP09_HUMAN Signal recognition particle 9 kDa protein OS=Homo sapiens GN=SRP9 PE=1 SV=2	1	1	1	1	1	1	1	1	1	1	1	1	1	1	1	1	10.5	10.5	10.5	10.112	86	86	0.0051881	1.3195	By matching	By MS/MS	By matching	By MS/MS	0	17575	17752	20225	16849	23009	17073	14559	21148	15900	0	16581	16780	20764
P49755	P49755	4	4	4	Transmembrane emp24 domain-containing protein 10	TMED10	sp|P49755|TMEDA_HUMAN Transmembrane emp24 domain-containing protein 10 OS=Homo sapiens GN=TMED10 PE=1 SV=2	1	4	4	4	3	3	3	4	3	3	3	4	3	3	3	4	14.2	14.2	14.2	24.976	219	219	0	7.439	By MS/MS	By MS/MS	By MS/MS	By MS/MS	457.64	112130	97505	114800	126390	123880	120240	104380	161510	169200	819.29	105570	92673	118550
P49760	P49760	3	3	3	Dual specificity protein kinase CLK2	CLK2	sp|P49760|CLK2_HUMAN Dual specificity protein kinase CLK2 OS=Homo sapiens GN=CLK2 PE=1 SV=1	1	3	3	3	0	3	0	2	0	3	0	2	0	3	0	2	7.2	7.2	7.2	60.089	499	499	0	7.3417		By MS/MS		By MS/MS	57.208	28170	27046	29487	21302	22723	23185	19824	38224	30934	176.41	26460	25508	30161
P50395	P50395	1	1	1	Rab GDP dissociation inhibitor beta	GDI2	sp|P50395|GDIB_HUMAN Rab GDP dissociation inhibitor beta OS=Homo sapiens GN=GDI2 PE=1 SV=2	1	1	1	1	0	0	0	1	0	0	0	1	0	0	0	1	2.5	2.5	2.5	50.663	445	445	0.005168	1.3022				By MS/MS	0	4591.6	4245.5	4278.6	3345.4	2726.5	2508.6	2934.5	5500.2	4233.1	0	4303.6	4003.5	4396.6
P50402	P50402	1	1	1	Emerin	EMD	sp|P50402|EMD_HUMAN Emerin OS=Homo sapiens GN=EMD PE=1 SV=1	1	1	1	1	1	1	1	1	1	1	1	1	1	1	1	1	3.9	3.9	3.9	28.994	254	254	0	1.9483	By MS/MS	By MS/MS	By matching	By MS/MS	0	20787	14112	17249	15490	19099	15200	13767	20020	18542	0	19525	13369	18104
P50454	P50454	1	1	1	Serpin H1	SERPINH1	sp|P50454|SERPH_HUMAN Serpin H1 OS=Homo sapiens GN=SERPINH1 PE=1 SV=2	1	1	1	1	0	0	0	1	0	0	0	1	0	0	0	1	6.2	6.2	6.2	46.44	418	418	0	7.4269				By MS/MS	0	1983.7	1902.7	2008.5	1678.4	2045.5	1819.1	1423.6	2502.9	2271	0	1866.3	1796.8	2072.4
Q8IZP2;P50502;Q8NFI4	Q8IZP2;P50502;Q8NFI4	3;3;2	3;3;2	3;3;2	Putative protein FAM10A4;Hsc70-interacting protein;Putative protein FAM10A5	ST13P4;ST13;ST13P5	sp|Q8IZP2|ST134_HUMAN Putative protein FAM10A4 OS=Homo sapiens GN=ST13P4 PE=5 SV=1;sp|P50502|F10A1_HUMAN Hsc70-interacting protein OS=Homo sapiens GN=ST13 PE=1 SV=2;sp|Q8NFI4|F10A5_HUMAN Putative protein FAM10A5 OS=Homo sapiens GN=ST13P5 PE=5 SV=1	3	3	3	3	3	3	2	1	3	3	2	1	3	3	2	1	12.9	12.9	12.9	27.406	240	240;369;369	0	7.086	By MS/MS	By MS/MS	By MS/MS	By MS/MS	566.18	83668	68812	81294	73731	73194	81889	58715	72486	72481	862.83	78608	65202	83862
P50914	P50914	8	8	8	60S ribosomal protein L14	RPL14	sp|P50914|RL14_HUMAN 60S ribosomal protein L14 OS=Homo sapiens GN=RPL14 PE=1 SV=4	1	8	8	8	2	8	3	7	2	8	3	7	2	8	3	7	34.4	34.4	34.4	23.432	215	215	0	42.989	By MS/MS	By MS/MS	By matching	By MS/MS	424.81	176350	166060	166790	176770	199860	183160	122450	191240	135060	769.52	166000	157270	173730
P50990	P50990	8	8	8	T-complex protein 1 subunit theta	CCT8	sp|P50990|TCPQ_HUMAN T-complex protein 1 subunit theta OS=Homo sapiens GN=CCT8 PE=1 SV=4	1	8	8	8	7	7	5	6	7	7	5	6	7	7	5	6	15.7	15.7	15.7	59.62	548	548	0	36.127	By MS/MS	By MS/MS	By MS/MS	By MS/MS	585.21	209140	192800	219250	246260	228300	234140	172240	231340	243170	941.74	196880	183170	225840
P50991	P50991	14	14	14	T-complex protein 1 subunit delta	CCT4	sp|P50991|TCPD_HUMAN T-complex protein 1 subunit delta OS=Homo sapiens GN=CCT4 PE=1 SV=4	1	14	14	14	9	12	6	12	9	12	6	12	9	12	6	12	31	31	31	57.924	539	539	0	62.535	By MS/MS	By MS/MS	By MS/MS	By MS/MS	814.55	237510	198390	219580	271030	246290	225240	179570	272290	219150	1313.2	223390	188750	228640
P51114;P51116	P51114;P51116	1;1	1;1	1;1	Fragile X mental retardation syndrome-related protein 1;Fragile X mental retardation syndrome-related protein 2	FXR1;FXR2	sp|P51114|FXR1_HUMAN Fragile X mental retardation syndrome-related protein 1 OS=Homo sapiens GN=FXR1 PE=1 SV=3;sp|P51116|FXR2_HUMAN Fragile X mental retardation syndrome-related protein 2 OS=Homo sapiens GN=FXR2 PE=1 SV=2	2	1	1	1	0	1	0	1	0	1	0	1	0	1	0	1	1.3	1.3	1.3	69.72	621	621;673	0.0051746	1.3061		By MS/MS		By matching	23.061	14141	18854	19623	11441	15550	15495	8485	15866	8245.6	162.04	13331	17733	19758
P51148;P61020	P51148	5;1	5;1	4;0	Ras-related protein Rab-5C	RAB5C	sp|P51148|RAB5C_HUMAN Ras-related protein Rab-5C OS=Homo sapiens GN=RAB5C PE=1 SV=2	2	5	5	4	3	4	1	5	3	4	1	5	2	3	1	4	31.5	31.5	26.4	23.482	216	216;215	0	47.824	By MS/MS	By MS/MS	By MS/MS	By MS/MS	378.28	104860	88648	98254	90899	94304	87173	70337	113090	95551	576.86	98525	83916	101780
P51149	P51149	7	7	7	Ras-related protein Rab-7a	RAB7A	sp|P51149|RAB7A_HUMAN Ras-related protein Rab-7a OS=Homo sapiens GN=RAB7A PE=1 SV=1	1	7	7	7	6	6	6	7	6	6	6	7	6	6	6	7	42	42	42	23.489	207	207	0	24.94	By MS/MS	By MS/MS	By MS/MS	By MS/MS	828.01	109610	93994	108770	80873	94963	86291	71896	113760	107640	1156.7	102990	88789	111960
P51571	P51571	2	2	2	Translocon-associated protein subunit delta	SSR4	sp|P51571|SSRD_HUMAN Translocon-associated protein subunit delta OS=Homo sapiens GN=SSR4 PE=1 SV=1	1	2	2	2	1	2	1	2	1	2	1	2	1	2	1	2	13.9	13.9	13.9	18.998	173	173	0	2.5497	By matching	By MS/MS	By matching	By MS/MS	246.16	20000	20213	21892	17768	19761	20391	15343	25514	18334	296.08	18817	19103	22406
P51572	P51572	3	3	3	B-cell receptor-associated protein 31	BCAP31	sp|P51572|BAP31_HUMAN B-cell receptor-associated protein 31 OS=Homo sapiens GN=BCAP31 PE=1 SV=3	1	3	3	3	1	3	1	3	1	3	1	3	1	3	1	3	10.2	10.2	10.2	27.991	246	246	0	4.2234	By MS/MS	By MS/MS	By MS/MS	By MS/MS	330.47	50290	69717	81134	70499	75992	73145	56597	81731	67946	627.17	47607	65984	81430
P51955;P51617	P51955;P51617	1;1	1;1	1;1	Serine/threonine-protein kinase Nek2;Interleukin-1 receptor-associated kinase 1	NEK2;IRAK1	sp|P51955|NEK2_HUMAN Serine/threonine-protein kinase Nek2 OS=Homo sapiens GN=NEK2 PE=1 SV=1;sp|P51617|IRAK1_HUMAN Interleukin-1 receptor-associated kinase 1 OS=Homo sapiens GN=IRAK1 PE=1 SV=2	2	1	1	1	0	1	0	1	0	1	0	1	0	1	0	1	1.8	1.8	1.8	51.763	445	445;712	0.0027397	1.6426		By MS/MS		By matching	0	12494	12872	13488	13857	14344	14135	10677	14719	9477.5	0	11769	12191	13876
P51991	P51991	1	1	1	Heterogeneous nuclear ribonucleoprotein A3	HNRNPA3	sp|P51991|ROA3_HUMAN Heterogeneous nuclear ribonucleoprotein A3 OS=Homo sapiens GN=HNRNPA3 PE=1 SV=2	1	1	1	1	1	1	0	1	1	1	0	1	1	1	0	1	3.4	3.4	3.4	39.594	378	378	0	2.0097	By matching	By MS/MS		By matching	138.73	7511	8452	7573.6	8171.7	8966.2	7854.4	6614.2	9486.8	4525	192.19	7075.6	8001	7850.8
P52272	P52272	19	19	19	Heterogeneous nuclear ribonucleoprotein M	HNRNPM	sp|P52272|HNRPM_HUMAN Heterogeneous nuclear ribonucleoprotein M OS=Homo sapiens GN=HNRNPM PE=1 SV=3	1	19	19	19	15	16	10	17	15	16	10	17	15	16	10	17	27.1	27.1	27.1	77.515	730	730	0	78.962	By MS/MS	By MS/MS	By MS/MS	By MS/MS	1680.5	383310	385140	405790	305050	393960	313200	242420	391860	306200	2967.7	360680	363320	416950
P52292	P52292	3	3	3	Importin subunit alpha-1	KPNA2	sp|P52292|IMA1_HUMAN Importin subunit alpha-1 OS=Homo sapiens GN=KPNA2 PE=1 SV=1	1	3	3	3	0	3	0	2	0	3	0	2	0	3	0	2	5.7	5.7	5.7	57.861	529	529	0	5.8548		By MS/MS		By MS/MS	0	28963	25919	28851	19963	24135	21451	17335	32751	28493	0	27205	24435	29661
P52298	P52298	4	4	4	Nuclear cap-binding protein subunit 2	NCBP2	sp|P52298|NCBP2_HUMAN Nuclear cap-binding protein subunit 2 OS=Homo sapiens GN=NCBP2 PE=1 SV=1	1	4	4	4	0	4	0	3	0	4	0	3	0	4	0	3	34.6	34.6	34.6	18.001	156	156	0	37.303		By MS/MS		By MS/MS	567.81	73144	66657	73926	45776	54099	49899	42537	62067	52042	879.89	68657	62802	75717
P52597	P52597	9	7	7	Heterogeneous nuclear ribonucleoprotein F;Heterogeneous nuclear ribonucleoprotein F, N-terminally processed	HNRNPF	sp|P52597|HNRPF_HUMAN Heterogeneous nuclear ribonucleoprotein F OS=Homo sapiens GN=HNRNPF PE=1 SV=3	1	9	7	7	9	9	7	8	7	7	5	6	7	7	5	6	27.2	20.7	20.7	45.671	415	415	0	46.172	By MS/MS	By MS/MS	By MS/MS	By MS/MS	956.87	232580	207250	227430	170790	203420	196420	163140	205380	209620	1826.2	218510	195600	234470
P52756	P52756	8	4	4	RNA-binding protein 5	RBM5	sp|P52756|RBM5_HUMAN RNA-binding protein 5 OS=Homo sapiens GN=RBM5 PE=1 SV=2	1	8	4	4	3	7	4	7	0	3	0	3	0	3	0	3	8.2	5	5	92.153	815	815	0	4.7871	By matching	By MS/MS	By matching	By MS/MS	129.75	16504	15501	17723	13913	15495	16395	11390	20459	16153	140.17	15520	14650	18147
P52815	P52815	4	4	4	39S ribosomal protein L12, mitochondrial	MRPL12	sp|P52815|RM12_HUMAN 39S ribosomal protein L12, mitochondrial OS=Homo sapiens GN=MRPL12 PE=1 SV=2	1	4	4	4	2	3	3	3	2	3	3	3	2	3	3	3	22.7	22.7	22.7	21.348	198	198	0	9.8157	By MS/MS	By MS/MS	By MS/MS	By MS/MS	431.91	72204	70839	82765	71704	78305	83142	62101	72160	93969	794.28	67997	67054	84565
P52907;P47755	P52907	3;1	3;1	3;1	F-actin-capping protein subunit alpha-1	CAPZA1	sp|P52907|CAZA1_HUMAN F-actin-capping protein subunit alpha-1 OS=Homo sapiens GN=CAPZA1 PE=1 SV=3	2	3	3	3	2	2	3	3	2	2	3	3	2	2	3	3	11.5	11.5	11.5	32.922	286	286;286	0	18.736	By matching	By MS/MS	By MS/MS	By MS/MS	205.38	47979	39509	43588	66046	41155	43630	31749	50652	43421	226.67	45059	37760	45236
P53618	P53618	9	9	9	Coatomer subunit beta	COPB1	sp|P53618|COPB_HUMAN Coatomer subunit beta OS=Homo sapiens GN=COPB1 PE=1 SV=3	1	9	9	9	5	4	7	5	5	4	7	5	5	4	7	5	11.5	11.5	11.5	107.14	953	953	0	25.939	By MS/MS	By MS/MS	By MS/MS	By MS/MS	1051.5	76711	70214	83612	133780	92002	102790	72790	76614	115660	1327.7	72291	67384	86044
P53621	P53621	7	7	7	Coatomer subunit alpha;Xenin;Proxenin	COPA	sp|P53621|COPA_HUMAN Coatomer subunit alpha OS=Homo sapiens GN=COPA PE=1 SV=2	1	7	7	7	2	6	5	6	2	6	5	6	2	6	5	6	6.6	6.6	6.6	138.34	1224	1224	0	19.818	By matching	By MS/MS	By matching	By MS/MS	511.44	95680	86098	94542	75254	82342	78915	65295	117730	96532	895.58	89889	81329	97338
P53985	P53985	2	2	2	Monocarboxylate transporter 1	SLC16A1	sp|P53985|MOT1_HUMAN Monocarboxylate transporter 1 OS=Homo sapiens GN=SLC16A1 PE=1 SV=3	1	2	2	2	1	1	2	2	1	1	2	2	1	1	2	2	3.8	3.8	3.8	53.944	500	500	0	4.0618	By MS/MS	By matching	By MS/MS	By MS/MS	108.27	28782	19341	20700	44730	26189	25267	20265	18507	35409	185.18	27022	18660	22086
P54105	P54105	6	6	6	Methylosome subunit pICln	CLNS1A	sp|P54105|ICLN_HUMAN Methylosome subunit pICln OS=Homo sapiens GN=CLNS1A PE=1 SV=1	1	6	6	6	5	6	5	6	5	6	5	6	5	6	5	6	31.2	31.2	31.2	26.215	237	237	0	146.56	By MS/MS	By MS/MS	By MS/MS	By MS/MS	1048	524760	470820	492520	511280	486540	500080	384430	554370	516370	1612.5	493160	446020	510500
P54136	P54136	3	3	3	Arginine--tRNA ligase, cytoplasmic	RARS	sp|P54136|SYRC_HUMAN Arginine--tRNA ligase, cytoplasmic OS=Homo sapiens GN=RARS PE=1 SV=2	1	3	3	3	0	2	0	3	0	2	0	3	0	2	0	3	5.3	5.3	5.3	75.378	660	660	0	6.2738		By MS/MS		By MS/MS	0	20493	21032	24961	12199	11917	12847	9853.3	16834	13988	0	19227	19772	25097
P54709	P54709	4	4	4	Sodium/potassium-transporting ATPase subunit beta-3	ATP1B3	sp|P54709|AT1B3_HUMAN Sodium/potassium-transporting ATPase subunit beta-3 OS=Homo sapiens GN=ATP1B3 PE=1 SV=1	1	4	4	4	2	3	3	4	2	3	3	4	2	3	3	4	17.2	17.2	17.2	31.512	279	279	0	14.172	By MS/MS	By MS/MS	By MS/MS	By MS/MS	427.41	86342	93938	100930	138210	113170	108040	78947	107020	114290	785.51	81464	89512	103480
P54886	P54886	1	1	1	Delta-1-pyrroline-5-carboxylate synthase;Glutamate 5-kinase;Gamma-glutamyl phosphate reductase	ALDH18A1	sp|P54886|P5CS_HUMAN Delta-1-pyrroline-5-carboxylate synthase OS=Homo sapiens GN=ALDH18A1 PE=1 SV=2	1	1	1	1	0	1	0	1	0	1	0	1	0	1	0	1	2	2	2	87.301	795	795	0	2.2715		By matching		By MS/MS	0	3886.3	2713.2	2887	2032.4	2071.9	2749.6	1840.7	3028.4	2534.4	0	3638	2557	3028.6
P55036;A2A3N6	P55036	12;4	12;4	12;4	26S proteasome non-ATPase regulatory subunit 4	PSMD4	sp|P55036|PSMD4_HUMAN 26S proteasome non-ATPase regulatory subunit 4 OS=Homo sapiens GN=PSMD4 PE=1 SV=1	2	12	12	12	10	12	9	11	10	12	9	11	10	12	9	11	40.1	40.1	40.1	40.736	377	377;862	0	146.35	By MS/MS	By MS/MS	By MS/MS	By MS/MS	672.62	329730	325470	372140	355950	402570	404630	291930	419960	357930	1438.5	310830	308360	381960
P55060	P55060	17	17	17	Exportin-2	CSE1L	sp|P55060|XPO2_HUMAN Exportin-2 OS=Homo sapiens GN=CSE1L PE=1 SV=3	1	17	17	17	10	12	11	13	10	12	11	13	10	12	11	13	19.1	19.1	19.1	110.42	971	971	0	46.726	By MS/MS	By MS/MS	By MS/MS	By MS/MS	1848.7	293130	269160	303680	341420	327420	311530	247900	313800	363330	2601.2	276000	255750	313360
P55072	P55072	6	6	6	Transitional endoplasmic reticulum ATPase	VCP	sp|P55072|TERA_HUMAN Transitional endoplasmic reticulum ATPase OS=Homo sapiens GN=VCP PE=1 SV=4	1	6	6	6	3	6	1	5	3	6	1	5	3	6	1	5	8.8	8.8	8.8	89.321	806	806	0	12.989	By matching	By MS/MS	By matching	By MS/MS	117.28	36883	39438	41204	22449	29160	27178	18804	29084	24178	293.93	34649	37077	41901
P55209;Q99733	P55209;Q99733	2;1	2;1	2;1	Nucleosome assembly protein 1-like 1;Nucleosome assembly protein 1-like 4	NAP1L1;NAP1L4	sp|P55209|NP1L1_HUMAN Nucleosome assembly protein 1-like 1 OS=Homo sapiens GN=NAP1L1 PE=1 SV=1;sp|Q99733|NP1L4_HUMAN Nucleosome assembly protein 1-like 4 OS=Homo sapiens GN=NAP1L4 PE=1 SV=1	2	2	2	2	2	2	1	1	2	2	1	1	2	2	1	1	6.9	6.9	6.9	45.374	391	391;375	0	9.8269	By MS/MS	By MS/MS	By matching	By MS/MS	168.6	33358	22964	31144	24846	32948	28699	23682	25706	30713	178.66	31364	21762	32352
P55327	P55327	1	1	1	Tumor protein D52	TPD52	sp|P55327|TPD52_HUMAN Tumor protein D52 OS=Homo sapiens GN=TPD52 PE=1 SV=2	1	1	1	1	1	1	1	1	1	1	1	1	1	1	1	1	6.2	6.2	6.2	24.327	224	224	0	4.7916	By matching	By matching	By matching	By MS/MS	0	11186	9616.1	11645	8146	9534.3	10249	7224.3	13144	10872	0	10511	9076	11931
P55735	P55735	1	1	1	Protein SEC13 homolog	SEC13	sp|P55735|SEC13_HUMAN Protein SEC13 homolog OS=Homo sapiens GN=SEC13 PE=1 SV=3	1	1	1	1	1	1	1	0	1	1	1	0	1	1	1	0	2.5	2.5	2.5	35.54	322	322	0	3.0275	By matching	By MS/MS	By matching		0	4876.8	5163.6	4901.3	5632.5	8000.6	4190.4	4073.1	8105.8	2295.8	0	4610.2	4891.2	5141.1
P55786;A6NEC2	P55786;A6NEC2	3;2	3;2	3;2	Puromycin-sensitive aminopeptidase;Puromycin-sensitive aminopeptidase-like protein	NPEPPS;NPEPPSL1	sp|P55786|PSA_HUMAN Puromycin-sensitive aminopeptidase OS=Homo sapiens GN=NPEPPS PE=1 SV=2;sp|A6NEC2|PSAL_HUMAN Puromycin-sensitive aminopeptidase-like protein OS=Homo sapiens GN=NPEPPSL1 PE=2 SV=3	2	3	3	3	1	3	1	1	1	3	1	1	1	3	1	1	3.5	3.5	3.5	103.28	919	919;478	0	8.5138	By matching	By MS/MS	By matching	By matching	24.087	25132	28851	31828	23864	31136	32448	25359	37058	23919	216.03	23708	27224	32362
P55795	P55795	10	3	3	Heterogeneous nuclear ribonucleoprotein H2	HNRNPH2	sp|P55795|HNRH2_HUMAN Heterogeneous nuclear ribonucleoprotein H2 OS=Homo sapiens GN=HNRNPH2 PE=1 SV=1	1	10	3	3	7	9	7	10	0	2	1	3	0	2	1	3	26.3	10.2	10.2	49.263	449	449	0	11.039	By matching	By MS/MS	By matching	By MS/MS	0	20320	14326	16393	14079	15859	14038	11977	18831	13573	0	19064	13548	17184
Q6EEV6;P61956;P55854	Q6EEV6;P61956;P55854	1;1;1	1;1;1	1;1;1	Small ubiquitin-related modifier 4;Small ubiquitin-related modifier 2;Small ubiquitin-related modifier 3	SUMO4;SUMO2;SUMO3	sp|Q6EEV6|SUMO4_HUMAN Small ubiquitin-related modifier 4 OS=Homo sapiens GN=SUMO4 PE=1 SV=2;sp|P61956|SUMO2_HUMAN Small ubiquitin-related modifier 2 OS=Homo sapiens GN=SUMO2 PE=1 SV=3;sp|P55854|SUMO3_HUMAN Small ubiquitin-related modifier 3 OS=Homo sapiens	3	1	1	1	1	0	0	0	1	0	0	0	1	0	0	0	12.6	12.6	12.6	10.685	95	95;95;103	0.001387	1.7071	By MS/MS				141.37	9665.2	4802.2	6678.1	7004.4	9241.2	7506.6	8495.8	4135.9	9873.8	167.43	9076.4	4583.3	7173.5
P55884	P55884	3	3	3	Eukaryotic translation initiation factor 3 subunit B	EIF3B	sp|P55884|EIF3B_HUMAN Eukaryotic translation initiation factor 3 subunit B OS=Homo sapiens GN=EIF3B PE=1 SV=3	1	3	3	3	1	2	1	3	1	2	1	3	1	2	1	3	4.5	4.5	4.5	92.48	814	814	0	53.56	By matching	By matching	By MS/MS	By MS/MS	96.824	21495	14409	17675	14475	16757	16275	13427	23533	20493	121.93	20168	13638	18489
P56134	P56134	1	1	1	ATP synthase subunit f, mitochondrial	ATP5J2	sp|P56134|ATPK_HUMAN ATP synthase subunit f, mitochondrial OS=Homo sapiens GN=ATP5J2 PE=1 SV=3	1	1	1	1	0	1	0	1	0	1	0	1	0	1	0	1	13.8	13.8	13.8	10.918	94	94	0	8.8237		By MS/MS		By MS/MS	206.48	16184	14265	14070	13079	17760	15344	10522	19758	17475	249.32	15226	13492	14772
P56192	P56192	7	7	7	Methionine--tRNA ligase, cytoplasmic	MARS	sp|P56192|SYMC_HUMAN Methionine--tRNA ligase, cytoplasmic OS=Homo sapiens GN=MARS PE=1 SV=2	1	7	7	7	4	7	1	7	4	7	1	7	4	7	1	7	10	10	10	101.11	900	900	0	22.382	By matching	By MS/MS	By matching	By MS/MS	471.75	76645	71562	75678	65920	80134	73879	58028	98235	62452	776.59	72112	67649	78305
Q5VTU8;P56381	Q5VTU8;P56381	2;2	2;2	2;2	ATP synthase subunit epsilon-like protein, mitochondrial;ATP synthase subunit epsilon, mitochondrial	ATP5EP2;ATP5E	sp|Q5VTU8|AT5EL_HUMAN ATP synthase subunit epsilon-like protein, mitochondrial OS=Homo sapiens GN=ATP5EP2 PE=3 SV=1;sp|P56381|ATP5E_HUMAN ATP synthase subunit epsilon, mitochondrial OS=Homo sapiens GN=ATP5E PE=1 SV=2	2	2	2	2	2	2	2	2	2	2	2	2	2	2	2	2	31.4	31.4	31.4	5.8068	51	51;51	0	2.7083	By MS/MS	By MS/MS	By matching	By MS/MS	98.79	61546	82500	92650	59765	62362	62868	49753	56115	53400	531.66	58009	77725	92620
P56385	P56385	4	4	4	ATP synthase subunit e, mitochondrial	ATP5I	sp|P56385|ATP5I_HUMAN ATP synthase subunit e, mitochondrial OS=Homo sapiens GN=ATP5I PE=1 SV=2	1	4	4	4	3	3	3	4	3	3	3	4	3	3	3	4	42	42	42	7.9331	69	69	0	13.248	By MS/MS	By MS/MS	By MS/MS	By MS/MS	531.29	134890	138220	174360	184630	165000	171390	137580	143150	194920	1202.2	127240	131430	176930
P56537	P56537	1	1	1	Eukaryotic translation initiation factor 6	EIF6	sp|P56537|IF6_HUMAN Eukaryotic translation initiation factor 6 OS=Homo sapiens GN=EIF6 PE=1 SV=1	1	1	1	1	0	1	0	1	0	1	0	1	0	1	0	1	9.8	9.8	9.8	26.599	245	245	0	18.162		By MS/MS		By MS/MS	0	4296.7	3808.6	4242	3412.7	3322.3	3318.2	2862.7	4245.8	3418.1	0	4033.8	3597.3	4357.7
P57088	P57088	3	3	3	Transmembrane protein 33	TMEM33	sp|P57088|TMM33_HUMAN Transmembrane protein 33 OS=Homo sapiens GN=TMEM33 PE=1 SV=2	1	3	3	3	2	1	2	3	2	1	2	3	2	1	2	3	12.1	12.1	12.1	27.978	247	247	0	21.345	By MS/MS	By MS/MS	By MS/MS	By MS/MS	0	72157	53701	55415	74920	55201	56590	44117	77919	69631	0	67679	51097	58377
P57678	P57678	2	2	2	Gem-associated protein 4	GEMIN4	sp|P57678|GEMI4_HUMAN Gem-associated protein 4 OS=Homo sapiens GN=GEMIN4 PE=1 SV=2	1	2	2	2	1	2	1	1	1	2	1	1	1	2	1	1	2.4	2.4	2.4	120.04	1058	1058	0	4.6927	By matching	By MS/MS	By matching	By matching	217.46	10632	12927	13698	11685	14268	13585	10470	15888	9409.5	284.19	10038	12226	13938
P60174	P60174	2	2	2	Triosephosphate isomerase	TPI1	sp|P60174|TPIS_HUMAN Triosephosphate isomerase OS=Homo sapiens GN=TPI1 PE=1 SV=3	1	2	2	2	2	2	2	2	2	2	2	2	2	2	2	2	8.7	8.7	8.7	30.791	286	286	0	37.566	By MS/MS	By matching	By MS/MS	By matching	123.76	86206	31282	35645	16492	23725	36329	14966	10574	16757	235.76	80427	29393	40043
P60228	P60228	3	3	3	Eukaryotic translation initiation factor 3 subunit E	EIF3E	sp|P60228|EIF3E_HUMAN Eukaryotic translation initiation factor 3 subunit E OS=Homo sapiens GN=EIF3E PE=1 SV=1	1	3	3	3	0	3	1	3	0	3	1	3	0	3	1	3	6.1	6.1	6.1	52.22	445	445	0	4.9446		By MS/MS	By matching	By MS/MS	430.04	90739	85762	98631	68469	78918	76252	58554	101760	79692	993.03	85286	80916	100720
P60468	P60468	1	1	1	Protein transport protein Sec61 subunit beta	SEC61B	sp|P60468|SC61B_HUMAN Protein transport protein Sec61 subunit beta OS=Homo sapiens GN=SEC61B PE=1 SV=2	1	1	1	1	1	1	1	1	1	1	1	1	1	1	1	1	10.4	10.4	10.4	9.9743	96	96	0	2.3907	By matching	By MS/MS	By matching	By MS/MS	62.056	30077	35672	40832	28439	37986	37084	23803	42341	43632	148.93	28388	33648	41311
P60660;P14649	P60660	8;2	8;2	8;2	Myosin light polypeptide 6	MYL6	sp|P60660|MYL6_HUMAN Myosin light polypeptide 6 OS=Homo sapiens GN=MYL6 PE=1 SV=2	2	8	8	8	7	8	7	8	7	8	7	8	7	8	7	8	60.3	60.3	60.3	16.93	151	151;208	0	87.197	By MS/MS	By MS/MS	By MS/MS	By MS/MS	2177.9	372360	336940	412310	450240	421620	435820	401480	515860	493560	3255.2	350740	320470	423020
P60842;Q14240	P60842;Q14240	2;2	1;1	1;1	Eukaryotic initiation factor 4A-I;Eukaryotic initiation factor 4A-II;Eukaryotic initiation factor 4A-II, N-terminally processed	EIF4A1;EIF4A2	sp|P60842|IF4A1_HUMAN Eukaryotic initiation factor 4A-I OS=Homo sapiens GN=EIF4A1 PE=1 SV=1;sp|Q14240|IF4A2_HUMAN Eukaryotic initiation factor 4A-II OS=Homo sapiens GN=EIF4A2 PE=1 SV=2	2	2	1	1	1	2	0	1	1	1	0	0	1	1	0	0	6.4	2.5	2.5	46.153	406	406;407	0.0086101	1.1436	By matching	By MS/MS		By matching	123.39	6446.9	5488.6	6119	3872.9	5283.8	4314.5	5627.4	4833.1	4330.9	155.81	6053.7	5177.9	6316.7
P60866	P60866	2	2	2	40S ribosomal protein S20	RPS20	sp|P60866|RS20_HUMAN 40S ribosomal protein S20 OS=Homo sapiens GN=RPS20 PE=1 SV=1	1	2	2	2	0	2	0	2	0	2	0	2	0	2	0	2	19.3	19.3	19.3	13.373	119	119	0	5.6141		By MS/MS		By MS/MS	280.83	65740	68681	73471	72501	85491	76788	62827	96193	72815	668.99	62009	65042	75616
P60891	P60891	1	1	1	Ribose-phosphate pyrophosphokinase 1	PRPS1	sp|P60891|PRPS1_HUMAN Ribose-phosphate pyrophosphokinase 1 OS=Homo sapiens GN=PRPS1 PE=1 SV=2	1	1	1	1	0	1	0	1	0	1	0	1	0	1	0	1	3.1	3.1	3.1	34.834	318	318	0.0063776	1.2458		By matching		By MS/MS	0	5350	5503.4	6452.2	5353.5	5242.3	4829.5	3271.6	6937.8	6287	0	5035.3	5204	6549.6
P60953	P60953	1	1	1	Cell division control protein 42 homolog	CDC42	sp|P60953|CDC42_HUMAN Cell division control protein 42 homolog OS=Homo sapiens GN=CDC42 PE=1 SV=2	1	1	1	1	0	0	0	1	0	0	0	1	0	0	0	1	5.8	5.8	5.8	21.258	191	191	0	2.6512				By MS/MS	116.11	11696	13368	14251	10839	13189	13742	10902	18536	14720	207.78	11021	12619	14501
P60981	P60981	2	2	2	Destrin	DSTN	sp|P60981|DEST_HUMAN Destrin OS=Homo sapiens GN=DSTN PE=1 SV=3	1	2	2	2	1	1	0	2	1	1	0	2	1	1	0	2	16.4	16.4	16.4	18.506	165	165	0	2.2615	By matching	By MS/MS		By MS/MS	0	4812.4	3960.7	4511.6	4145	4982.4	4567.6	4107.3	6251	4700.1	0	4526.5	3749.3	4690.9
P61009	P61009	1	1	1	Signal peptidase complex subunit 3	SPCS3	sp|P61009|SPCS3_HUMAN Signal peptidase complex subunit 3 OS=Homo sapiens GN=SPCS3 PE=1 SV=1	1	1	1	1	1	1	1	1	1	1	1	1	1	1	1	1	5	5	5	20.313	180	180	0.0040595	1.5694	By matching	By MS/MS	By matching	By MS/MS	0	28301	20909	24180	22087	24981	22950	19591	31195	21611	0	26579	19796	25271
P61019;Q8WUD1	P61019;Q8WUD1	4;2	4;2	4;2	Ras-related protein Rab-2A;Ras-related protein Rab-2B	RAB2A;RAB2B	sp|P61019|RAB2A_HUMAN Ras-related protein Rab-2A OS=Homo sapiens GN=RAB2A PE=1 SV=1;sp|Q8WUD1|RAB2B_HUMAN Ras-related protein Rab-2B OS=Homo sapiens GN=RAB2B PE=1 SV=1	2	4	4	4	3	3	2	4	3	3	2	4	3	3	2	4	21.2	21.2	21.2	23.545	212	212;216	0	9.5308	By matching	By MS/MS	By MS/MS	By MS/MS	220.5	36964	38431	41761	61465	42761	47337	34274	50420	42669	306.44	34828	36693	42795
P61026	P61026	4	3	3	Ras-related protein Rab-10	RAB10	sp|P61026|RAB10_HUMAN Ras-related protein Rab-10 OS=Homo sapiens GN=RAB10 PE=1 SV=1	1	4	3	3	1	4	3	4	0	3	2	3	0	3	2	3	20.5	15	15	22.541	200	200	0	5.0471	By matching	By MS/MS	By MS/MS	By MS/MS	165.28	45288	44931	45368	69578	50833	55194	41712	55850	51951	314.96	42638	42860	46971
P61106	P61106	3	3	3	Ras-related protein Rab-14	RAB14	sp|P61106|RAB14_HUMAN Ras-related protein Rab-14 OS=Homo sapiens GN=RAB14 PE=1 SV=4	1	3	3	3	2	3	2	2	2	3	2	2	2	3	2	2	14.9	14.9	14.9	23.897	215	215	0	10.581	By matching	By MS/MS	By matching	By MS/MS	89.526	49196	51663	56772	38917	47221	42628	34861	58414	42339	185.09	46285	48699	57807
P61224;P62834;A6NIZ1	P61224;P62834;A6NIZ1	5;5;3	5;5;3	5;5;3	Ras-related protein Rap-1b;Ras-related protein Rap-1A;Ras-related protein Rap-1b-like protein	RAP1B;RAP1A	sp|P61224|RAP1B_HUMAN Ras-related protein Rap-1b OS=Homo sapiens GN=RAP1B PE=1 SV=1;sp|P62834|RAP1A_HUMAN Ras-related protein Rap-1A OS=Homo sapiens GN=RAP1A PE=1 SV=1;sp|A6NIZ1|RP1BL_HUMAN Ras-related protein Rap-1b-like protein OS=Homo sapiens PE=2 SV=1	3	5	5	5	0	3	0	5	0	3	0	5	0	3	0	5	31	31	31	20.825	184	184;184;184	0	19.311		By MS/MS		By MS/MS	88.178	71732	64690	70052	58379	70553	63863	48852	87556	65316	318.31	67452	61111	72441
P61247	P61247	14	14	14	40S ribosomal protein S3a	RPS3A	sp|P61247|RS3A_HUMAN 40S ribosomal protein S3a OS=Homo sapiens GN=RPS3A PE=1 SV=2	1	14	14	14	6	13	3	13	6	13	3	13	6	13	3	13	51.9	51.9	51.9	29.945	264	264	0	43.81	By matching	By MS/MS	By matching	By MS/MS	542.01	255000	259090	270600	259100	303350	281120	194470	324390	235420	1562.1	240260	245130	279100
P61254;Q9UNX3	P61254;Q9UNX3	6;5	6;5	6;5	60S ribosomal protein L26;60S ribosomal protein L26-like 1	RPL26;RPL26L1	sp|P61254|RL26_HUMAN 60S ribosomal protein L26 OS=Homo sapiens GN=RPL26 PE=1 SV=1;sp|Q9UNX3|RL26L_HUMAN 60S ribosomal protein L26-like 1 OS=Homo sapiens GN=RPL26L1 PE=1 SV=1	2	6	6	6	5	5	2	5	5	5	2	5	5	5	2	5	33.1	33.1	33.1	17.258	145	145;145	0	15.983	By MS/MS	By MS/MS	By MS/MS	By MS/MS	808.26	206020	140450	153200	156600	160490	147880	111270	149890	159440	1229.5	193240	133140	162060
P61289	P61289	1	1	1	Proteasome activator complex subunit 3	PSME3	sp|P61289|PSME3_HUMAN Proteasome activator complex subunit 3 OS=Homo sapiens GN=PSME3 PE=1 SV=1	1	1	1	1	1	1	0	1	1	1	0	1	1	1	0	1	5.9	5.9	5.9	29.506	254	254	0	7.0925	By matching	By matching		By MS/MS	0	4637	3994.4	4529.6	3880.6	4647.9	4275.8	3366.4	6582.9	4627.3	0	4361	3777	4686.3
P61313	P61313	9	9	9	60S ribosomal protein L15	RPL15	sp|P61313|RL15_HUMAN 60S ribosomal protein L15 OS=Homo sapiens GN=RPL15 PE=1 SV=2	1	9	9	9	5	9	1	8	5	9	1	8	5	9	1	8	40.7	40.7	40.7	24.146	204	204	0	26.808	By matching	By MS/MS	By matching	By MS/MS	628.04	139370	134980	130840	139530	162020	134480	103580	155780	110270	880.22	131220	127790	136500
P61353	P61353	6	6	6	60S ribosomal protein L27	RPL27	sp|P61353|RL27_HUMAN 60S ribosomal protein L27 OS=Homo sapiens GN=RPL27 PE=1 SV=2	1	6	6	6	4	6	5	5	4	6	5	5	4	6	5	5	31.6	31.6	31.6	15.798	136	136	0	13.002	By MS/MS	By MS/MS	By MS/MS	By MS/MS	1580.8	229170	193500	206490	228280	214970	220000	150680	211150	233560	2170.1	215360	183650	214980
P61513;A6NKH3	P61513	3;1	3;1	3;1	60S ribosomal protein L37a	RPL37A	sp|P61513|RL37A_HUMAN 60S ribosomal protein L37a OS=Homo sapiens GN=RPL37A PE=1 SV=2	2	3	3	3	0	3	0	2	0	3	0	2	0	3	0	2	23.9	23.9	23.9	10.275	92	92;93	0	3.8896		By MS/MS		By MS/MS	375.37	53815	53122	54735	68852	79640	77375	51127	84596	64248	522.11	50812	50498	57106
P61604	P61604	1	1	1	10 kDa heat shock protein, mitochondrial	HSPE1	sp|P61604|CH10_HUMAN 10 kDa heat shock protein, mitochondrial OS=Homo sapiens GN=HSPE1 PE=1 SV=2	1	1	1	1	1	1	0	1	1	1	0	1	1	1	0	1	13.7	13.7	13.7	10.932	102	102	0	2.1918	By matching	By MS/MS		By MS/MS	101.39	23300	23630	23627	18075	18561	18246	13804	24206	19616	174.21	21880	22282	24228
P61619;Q9H9S3	P61619;Q9H9S3	5;3	5;3	5;3	Protein transport protein Sec61 subunit alpha isoform 1;Protein transport protein Sec61 subunit alpha isoform 2	SEC61A1;SEC61A2	sp|P61619|S61A1_HUMAN Protein transport protein Sec61 subunit alpha isoform 1 OS=Homo sapiens GN=SEC61A1 PE=1 SV=2;sp|Q9H9S3|S61A2_HUMAN Protein transport protein Sec61 subunit alpha isoform 2 OS=Homo sapiens GN=SEC61A2 PE=2 SV=3	2	5	5	5	5	5	2	5	5	5	2	5	5	5	2	5	8.2	8.2	8.2	52.264	476	476;476	0	9.3145	By MS/MS	By MS/MS	By MS/MS	By MS/MS	242.45	116990	111280	120580	151870	122220	117670	91452	135880	124040	452.64	110090	105850	124250
P61803	P61803	3	3	3	Dolichyl-diphosphooligosaccharide--protein glycosyltransferase subunit DAD1	DAD1	sp|P61803|DAD1_HUMAN Dolichyl-diphosphooligosaccharide--protein glycosyltransferase subunit DAD1 OS=Homo sapiens GN=DAD1 PE=1 SV=3	1	3	3	3	2	3	3	3	2	3	3	3	2	3	3	3	28.3	28.3	28.3	12.497	113	113	0	8.3439	By MS/MS	By MS/MS	By matching	By MS/MS	131.39	76002	57517	66154	48683	52906	52048	44041	69396	61656	237.2	71275	54294	68623
P61927	P61927	4	4	4	60S ribosomal protein L37	RPL37	sp|P61927|RL37_HUMAN 60S ribosomal protein L37 OS=Homo sapiens GN=RPL37 PE=1 SV=2	1	4	4	4	1	3	1	4	1	3	1	4	1	3	1	4	32	32	32	11.078	97	97	0	4.609	By MS/MS	By MS/MS	By matching	By MS/MS	412.84	62403	47788	53456	58645	110720	53050	80626	74212	81039	569.85	59020	45387	57356
P61978	P61978	19	19	19	Heterogeneous nuclear ribonucleoprotein K	HNRNPK	sp|P61978|HNRPK_HUMAN Heterogeneous nuclear ribonucleoprotein K OS=Homo sapiens GN=HNRNPK PE=1 SV=1	1	19	19	19	12	18	14	18	12	18	14	18	12	18	14	18	56.4	56.4	56.4	50.976	463	463	0	303.7	By MS/MS	By MS/MS	By MS/MS	By MS/MS	4133.3	970840	852990	922760	1022500	938760	915330	715720	969270	947530	6997.4	912710	809560	956310
P62081	P62081	2	2	2	40S ribosomal protein S7	RPS7	sp|P62081|RS7_HUMAN 40S ribosomal protein S7 OS=Homo sapiens GN=RPS7 PE=1 SV=1	1	2	2	2	1	1	1	2	1	1	1	2	1	1	1	2	10.3	10.3	10.3	22.127	194	194	0	3.6869	By MS/MS	By MS/MS	By matching	By MS/MS	124.1	51443	43741	49452	35525	47186	47134	31558	37732	29584	373.61	48345	41271	51125
P62191	P62191	6	6	6	26S protease regulatory subunit 4	PSMC1	sp|P62191|PRS4_HUMAN 26S proteasome regulatory subunit 4 OS=Homo sapiens GN=PSMC1 PE=1 SV=1	1	6	6	6	3	6	3	4	3	6	3	4	3	6	3	4	15.5	15.5	15.5	49.184	440	440	0	14.587	By matching	By MS/MS	By matching	By MS/MS	141.41	76978	93681	98239	88481	110040	104350	75780	123800	81301	336.66	72728	88556	100220
P62195;Q8NB90	P62195	9;1	9;1	9;1	26S protease regulatory subunit 8	PSMC5	sp|P62195|PRS8_HUMAN 26S proteasome regulatory subunit 8 OS=Homo sapiens GN=PSMC5 PE=1 SV=1	2	9	9	9	7	8	6	7	7	8	6	7	7	8	6	7	26.4	26.4	26.4	45.626	406	406;893	0	89.011	By MS/MS	By MS/MS	By MS/MS	By MS/MS	753.38	179980	166650	185780	184880	197230	196560	158000	220700	206100	1199.8	169430	157950	191670
P62241	P62241	12	12	12	40S ribosomal protein S8	RPS8	sp|P62241|RS8_HUMAN 40S ribosomal protein S8 OS=Homo sapiens GN=RPS8 PE=1 SV=2	1	12	12	12	5	12	5	12	5	12	5	12	5	12	5	12	58.2	58.2	58.2	24.205	208	208	0	122.75	By MS/MS	By MS/MS	By MS/MS	By MS/MS	1887.1	414340	407690	447790	404290	448260	439310	298700	499250	384490	3208.6	390090	385740	459860
P62244	P62244	3	3	3	40S ribosomal protein S15a	RPS15A	sp|P62244|RS15A_HUMAN 40S ribosomal protein S15a OS=Homo sapiens GN=RPS15A PE=1 SV=2	1	3	3	3	2	3	1	1	2	3	1	1	2	3	1	1	19.2	19.2	19.2	14.839	130	130	0	3.6028	By matching	By MS/MS	By MS/MS	By matching	196.13	51762	56747	62998	86141	57965	68749	39772	55633	46421	278.11	48773	54106	64098
P62249	P62249	9	9	9	40S ribosomal protein S16	RPS16	sp|P62249|RS16_HUMAN 40S ribosomal protein S16 OS=Homo sapiens GN=RPS16 PE=1 SV=2	1	9	9	9	6	8	3	7	6	8	3	7	6	8	3	7	52.1	52.1	52.1	16.445	146	146	0	27.027	By MS/MS	By MS/MS	By MS/MS	By MS/MS	683.47	213520	176270	189200	176440	195450	184790	134440	196660	167070	1205.6	200600	166800	197190
P62258	P62258	5	3	3	14-3-3 protein epsilon	YWHAE	sp|P62258|1433E_HUMAN 14-3-3 protein epsilon OS=Homo sapiens GN=YWHAE PE=1 SV=1	1	5	3	3	5	5	4	3	3	3	2	1	3	3	2	1	19.6	13.7	13.7	29.174	255	255	0	7.1204	By MS/MS	By MS/MS	By MS/MS	By matching	257.08	35117	21185	25950	32296	31418	35749	21214	18778	32678	290.98	32968	20214	27581
P62263	P62263	4	4	4	40S ribosomal protein S14	RPS14	sp|P62263|RS14_HUMAN 40S ribosomal protein S14 OS=Homo sapiens GN=RPS14 PE=1 SV=3	1	4	4	4	3	4	4	4	3	4	4	4	3	4	4	4	23.2	23.2	23.2	16.273	151	151	0	59.992	By MS/MS	By MS/MS	By MS/MS	By MS/MS	148.63	191550	132620	149330	147520	140330	138810	104730	142890	148890	367.64	179620	125670	156880
P62266	P62266	7	7	7	40S ribosomal protein S23	RPS23	sp|P62266|RS23_HUMAN 40S ribosomal protein S23 OS=Homo sapiens GN=RPS23 PE=1 SV=3	1	7	7	7	4	6	6	7	4	6	6	7	4	6	6	7	36.4	36.4	36.4	15.807	143	143	0	21.047	By MS/MS	By MS/MS	By MS/MS	By MS/MS	960.17	147300	143930	154790	168910	179450	179970	110470	109890	137660	1551	138810	136570	159910
P62269	P62269	14	14	14	40S ribosomal protein S18	RPS18	sp|P62269|RS18_HUMAN 40S ribosomal protein S18 OS=Homo sapiens GN=RPS18 PE=1 SV=3	1	14	14	14	10	13	8	11	10	13	8	11	10	13	8	11	62.5	62.5	62.5	17.718	152	152	0	64.762	By MS/MS	By MS/MS	By MS/MS	By MS/MS	1711.6	433660	336860	361530	455490	426270	423500	344130	400940	469140	2974.3	407560	320430	380020
P62277	P62277	9	9	9	40S ribosomal protein S13	RPS13	sp|P62277|RS13_HUMAN 40S ribosomal protein S13 OS=Homo sapiens GN=RPS13 PE=1 SV=2	1	9	9	9	7	8	3	8	7	8	3	8	7	8	3	8	55.6	55.6	55.6	17.222	151	151	0	41.455	By MS/MS	By MS/MS	By MS/MS	By MS/MS	1031.2	161630	149710	166040	146010	151520	148150	102030	178540	141720	1663.6	151960	141640	170690
P62280	P62280	8	8	8	40S ribosomal protein S11	RPS11	sp|P62280|RS11_HUMAN 40S ribosomal protein S11 OS=Homo sapiens GN=RPS11 PE=1 SV=3	1	8	8	8	3	8	6	7	3	8	6	7	3	8	6	7	43.7	43.7	43.7	18.431	158	158	0	22.037	By MS/MS	By MS/MS	By MS/MS	By MS/MS	897.68	175280	189450	202300	205890	215180	209660	145610	206530	200480	1973.4	165260	179500	207250
P62304	P62304	3	3	3	Small nuclear ribonucleoprotein E	SNRPE	sp|P62304|RUXE_HUMAN Small nuclear ribonucleoprotein E OS=Homo sapiens GN=SNRPE PE=1 SV=1	1	3	3	3	1	3	0	2	1	3	0	2	1	3	0	2	29.3	29.3	29.3	10.803	92	92	0	4.1789	By matching	By MS/MS		By MS/MS	0	50342	43287	43949	30912	34774	34301	27580	45497	32879	0	47209	40775	45569
P62306	P62306	2	2	2	Small nuclear ribonucleoprotein F	SNRPF	sp|P62306|RUXF_HUMAN Small nuclear ribonucleoprotein F OS=Homo sapiens GN=SNRPF PE=1 SV=1	1	2	2	2	2	2	1	2	2	2	1	2	2	2	1	2	24.4	24.4	24.4	9.7251	86	86	0	10.722	By matching	By MS/MS	By matching	By MS/MS	0	28469	21049	22074	18396	22091	21005	17417	32715	26972	0	26705	19875	23237
P62314	P62314	5	5	5	Small nuclear ribonucleoprotein Sm D1	SNRPD1	sp|P62314|SMD1_HUMAN Small nuclear ribonucleoprotein Sm D1 OS=Homo sapiens GN=SNRPD1 PE=1 SV=1	1	5	5	5	1	5	2	4	1	5	2	4	1	5	2	4	54.6	54.6	54.6	13.281	119	119	0	117.12	By matching	By MS/MS	By MS/MS	By MS/MS	258.26	210250	211530	201130	192960	188080	196580	147320	173850	190670	798.03	197550	199860	207900
P62316	P62316	10	10	10	Small nuclear ribonucleoprotein Sm D2	SNRPD2	sp|P62316|SMD2_HUMAN Small nuclear ribonucleoprotein Sm D2 OS=Homo sapiens GN=SNRPD2 PE=1 SV=1	1	10	10	10	5	10	7	10	5	10	7	10	5	10	7	10	60.2	60.2	60.2	13.527	118	118	0	109.77	By MS/MS	By MS/MS	By MS/MS	By MS/MS	950.54	382810	430800	467920	378140	402680	417980	295940	474260	372120	2388.4	360520	406850	475220
P62318	P62318	5	5	5	Small nuclear ribonucleoprotein Sm D3	SNRPD3	sp|P62318|SMD3_HUMAN Small nuclear ribonucleoprotein Sm D3 OS=Homo sapiens GN=SNRPD3 PE=1 SV=1	1	5	5	5	2	4	1	5	2	4	1	5	2	4	1	5	53.2	53.2	53.2	13.916	126	126	0	47.744	By MS/MS	By MS/MS	By matching	By MS/MS	96.385	53652	49294	50143	35875	40808	41679	38660	63111	49799	186.12	50354	46449	51754
P62333	P62333	11	11	11	26S protease regulatory subunit 10B	PSMC6	sp|P62333|PRS10_HUMAN 26S proteasome regulatory subunit 10B OS=Homo sapiens GN=PSMC6 PE=1 SV=1	1	11	11	11	3	8	3	10	3	8	3	10	3	8	3	10	31.1	31.1	31.1	44.172	389	389	0	54.451	By matching	By MS/MS	By MS/MS	By MS/MS	505.47	135020	126720	139110	220260	181340	199180	140860	231040	198850	922.97	127350	121220	144450
P62424	P62424	13	13	13	60S ribosomal protein L7a	RPL7A	sp|P62424|RL7A_HUMAN 60S ribosomal protein L7a OS=Homo sapiens GN=RPL7A PE=1 SV=2	1	13	13	13	5	11	5	10	5	11	5	10	5	11	5	10	45.1	45.1	45.1	29.995	266	266	0	53.313	By matching	By MS/MS	By MS/MS	By MS/MS	1059.8	193670	209480	219870	190540	241220	224240	153370	239360	180110	1809	182610	197970	225670
Q15907;P62491;P57735	Q15907;P62491	7;7;1	7;7;1	7;7;1	Ras-related protein Rab-11B;Ras-related protein Rab-11A	RAB11B;RAB11A	sp|Q15907|RB11B_HUMAN Ras-related protein Rab-11B OS=Homo sapiens GN=RAB11B PE=1 SV=4;sp|P62491|RB11A_HUMAN Ras-related protein Rab-11A OS=Homo sapiens GN=RAB11A PE=1 SV=3	3	7	7	7	6	6	5	5	6	6	5	5	6	6	5	5	29.8	29.8	29.8	24.488	218	218;216;213	0	22.356	By MS/MS	By MS/MS	By MS/MS	By MS/MS	685.86	233720	204920	228300	297660	253820	253990	186000	229670	239850	1436.6	219960	195190	236730
P62699	P62699	4	4	4	Protein yippee-like 5	YPEL5	sp|P62699|YPEL5_HUMAN Protein yippee-like 5 OS=Homo sapiens GN=YPEL5 PE=1 SV=1	1	4	4	4	1	3	0	4	1	3	0	4	1	3	0	4	35.5	35.5	35.5	13.841	121	121	0	12.814	By matching	By MS/MS		By MS/MS	99.847	76873	70990	78653	49206	55973	51145	43706	76077	59996	161.18	72154	66856	80449
P62701;Q8TD47;P22090	P62701;Q8TD47	12;6;4	12;6;4	12;6;4	40S ribosomal protein S4, X isoform;40S ribosomal protein S4, Y isoform 2	RPS4X;RPS4Y2	sp|P62701|RS4X_HUMAN 40S ribosomal protein S4, X isoform OS=Homo sapiens GN=RPS4X PE=1 SV=2;sp|Q8TD47|RS4Y2_HUMAN 40S ribosomal protein S4, Y isoform 2 OS=Homo sapiens GN=RPS4Y2 PE=2 SV=3	3	12	12	12	7	9	1	12	7	9	1	12	7	9	1	12	44.1	44.1	44.1	29.597	263	263;263;263	0	34.69	By MS/MS	By MS/MS	By matching	By MS/MS	973.51	272870	255100	273370	239600	285580	268080	185780	300300	239270	1876	256740	241160	282470
P62750	P62750	7	7	7	60S ribosomal protein L23a	RPL23A	sp|P62750|RL23A_HUMAN 60S ribosomal protein L23a OS=Homo sapiens GN=RPL23A PE=1 SV=1	1	7	7	7	5	7	3	6	5	7	3	6	5	7	3	6	35.9	35.9	35.9	17.695	156	156	0	14.423	By MS/MS	By MS/MS	By MS/MS	By MS/MS	2228.1	247610	301980	346920	287680	315430	288840	220470	243690	269440	3789	233760	285590	350230
P62753	P62753	11	11	11	40S ribosomal protein S6	RPS6	sp|P62753|RS6_HUMAN 40S ribosomal protein S6 OS=Homo sapiens GN=RPS6 PE=1 SV=1	1	11	11	11	6	11	2	10	6	11	2	10	6	11	2	10	42.2	42.2	42.2	28.68	249	249	0	76.972	By MS/MS	By MS/MS	By MS/MS	By MS/MS	1065.2	377560	433030	456010	432960	507730	478540	324380	490380	392160	2920.4	356380	409680	466550
P62805	P62805	4	4	4	Histone H4	HIST1H4A	sp|P62805|H4_HUMAN Histone H4 OS=Homo sapiens GN=HIST1H4A PE=1 SV=2	1	4	4	4	4	3	4	3	4	3	4	3	4	3	4	3	38.8	38.8	38.8	11.367	103	103	0	9.3845	By MS/MS	By MS/MS	By MS/MS	By MS/MS	12911	212570	136340	206040	305330	348570	240890	157560	163480	205970	12976	200920	132230	216980
P62820	P62820	6	2	2	Ras-related protein Rab-1A	RAB1A	sp|P62820|RAB1A_HUMAN Ras-related protein Rab-1A OS=Homo sapiens GN=RAB1A PE=1 SV=3	1	6	2	2	5	5	5	5	1	1	1	2	1	1	1	2	31.2	10.2	10.2	22.677	205	205	0	2.8672	By matching	By matching	By matching	By MS/MS	0	25634	25338	30235	21768	25615	22932	18749	33150	29442	0	24127	23919	30760
P62829	P62829	7	7	7	60S ribosomal protein L23	RPL23	sp|P62829|RL23_HUMAN 60S ribosomal protein L23 OS=Homo sapiens GN=RPL23 PE=1 SV=1	1	7	7	7	6	5	6	7	6	5	6	7	6	5	6	7	50.7	50.7	50.7	14.865	140	140	0	42.559	By MS/MS	By MS/MS	By MS/MS	By MS/MS	1096.8	358740	314340	342220	456620	395880	402180	287390	389780	389040	2196.5	337630	299430	355860
P62841	P62841	2	2	2	40S ribosomal protein S15	RPS15	sp|P62841|RS15_HUMAN 40S ribosomal protein S15 OS=Homo sapiens GN=RPS15 PE=1 SV=2	1	2	2	2	1	1	1	2	1	1	1	2	1	1	1	2	13.1	13.1	13.1	17.04	145	145	0	2.5259	By matching	By MS/MS	By matching	By MS/MS	0	23013	35882	37998	45709	56027	48414	37712	61882	54838	0	21947	34081	38650
P62847	P62847	5	5	5	40S ribosomal protein S24	RPS24	sp|P62847|RS24_HUMAN 40S ribosomal protein S24 OS=Homo sapiens GN=RPS24 PE=1 SV=1	1	5	5	5	4	5	3	5	4	5	3	5	4	5	3	5	35.3	35.3	35.3	15.423	133	133	0	23.39	By matching	By MS/MS	By matching	By MS/MS	1162.6	104800	111810	112980	106200	117750	120810	79669	128510	84805	1462.7	98693	105770	116170
P62851	P62851	4	4	4	40S ribosomal protein S25	RPS25	sp|P62851|RS25_HUMAN 40S ribosomal protein S25 OS=Homo sapiens GN=RPS25 PE=1 SV=1	1	4	4	4	3	4	1	4	3	4	1	4	3	4	1	4	28	28	28	13.742	125	125	0	13.215	By MS/MS	By MS/MS	By matching	By MS/MS	980.69	172060	148080	162010	177110	200360	207160	120920	184980	145010	1670	162010	140560	168970
P62854;Q5JNZ5	P62854;Q5JNZ5	2;1	2;1	2;1	40S ribosomal protein S26;Putative 40S ribosomal protein S26-like 1	RPS26;RPS26P11	sp|P62854|RS26_HUMAN 40S ribosomal protein S26 OS=Homo sapiens GN=RPS26 PE=1 SV=3;sp|Q5JNZ5|RS26L_HUMAN Putative 40S ribosomal protein S26-like 1 OS=Homo sapiens GN=RPS26P11 PE=5 SV=1	2	2	2	2	2	2	2	2	2	2	2	2	2	2	2	2	20.9	20.9	20.9	13.015	115	115;115	0	20.232	By MS/MS	By MS/MS	By matching	By MS/MS	0	78052	58319	63117	60466	70715	69622	48306	66223	58597	0	73302	55199	66410
P62857	P62857	3	3	3	40S ribosomal protein S28	RPS28	sp|P62857|RS28_HUMAN 40S ribosomal protein S28 OS=Homo sapiens GN=RPS28 PE=1 SV=1	1	3	3	3	0	3	0	3	0	3	0	3	0	3	0	3	46.4	46.4	46.4	7.8409	69	69	0	9.4571		By MS/MS		By MS/MS	385.01	81760	72259	74210	54495	59875	57889	39453	63122	46984	684.92	76708	68131	76747
P62873;Q9HAV0;P62879;P16520	P62873;Q9HAV0;P62879	3;2;2;1	3;2;2;1	2;2;2;1	Guanine nucleotide-binding protein G(I)/G(S)/G(T) subunit beta-1;Guanine nucleotide-binding protein subunit beta-4;Guanine nucleotide-binding protein G(I)/G(S)/G(T) subunit beta-2	GNB1;GNB4;GNB2	sp|P62873|GBB1_HUMAN Guanine nucleotide-binding protein G(I)/G(S)/G(T) subunit beta-1 OS=Homo sapiens GN=GNB1 PE=1 SV=3;sp|Q9HAV0|GBB4_HUMAN Guanine nucleotide-binding protein subunit beta-4 OS=Homo sapiens GN=GNB4 PE=1 SV=3;sp|P62879|GBB2_HUMAN Guanine nu	4	3	3	2	1	2	2	3	1	2	2	3	1	2	1	2	10	10	5.9	37.377	340	340;340;340;340	0	4.0448	By MS/MS	By MS/MS	By MS/MS	By MS/MS	644.39	60749	51623	51940	79564	109510	59467	64565	84172	51108	753.78	57468	49270	55790
P62888	P62888	6	6	6	60S ribosomal protein L30	RPL30	sp|P62888|RL30_HUMAN 60S ribosomal protein L30 OS=Homo sapiens GN=RPL30 PE=1 SV=2	1	6	6	6	3	6	2	6	3	6	2	6	3	6	2	6	50.4	50.4	50.4	12.784	115	115	0	48.036	By matching	By MS/MS	By matching	By MS/MS	179.75	147060	134640	141170	136940	151350	150380	97832	159840	105020	542.65	138330	127410	146410
Q59GN2;P62891	Q59GN2;P62891	1;1	1;1	1;1	Putative 60S ribosomal protein L39-like 5;60S ribosomal protein L39	RPL39P5;RPL39	sp|Q59GN2|R39L5_HUMAN Putative 60S ribosomal protein L39-like 5 OS=Homo sapiens GN=RPL39P5 PE=5 SV=2;sp|P62891|RL39_HUMAN 60S ribosomal protein L39 OS=Homo sapiens GN=RPL39 PE=1 SV=2	2	1	1	1	1	1	1	1	1	1	1	1	1	1	1	1	19.6	19.6	19.6	6.3225	51	51;51	0	2.2512	By MS/MS	By matching	By matching	By matching	182.86	10805	6035	7371.2	6650.5	9403.5	7121.2	8139.5	4942.1	11182	215.26	10140	5730.1	7906.1
P62899	P62899	4	4	4	60S ribosomal protein L31	RPL31	sp|P62899|RL31_HUMAN 60S ribosomal protein L31 OS=Homo sapiens GN=RPL31 PE=1 SV=1	1	4	4	4	4	3	2	4	4	3	2	4	4	3	2	4	30.4	30.4	30.4	14.463	125	125	0	7.1528	By MS/MS	By MS/MS	By MS/MS	By MS/MS	619.27	126600	86647	91658	71010	72797	72409	56945	60942	79408	964.11	118550	81789	96570
P62906	P62906	9	9	9	60S ribosomal protein L10a	RPL10A	sp|P62906|RL10A_HUMAN 60S ribosomal protein L10a OS=Homo sapiens GN=RPL10A PE=1 SV=2	1	9	9	9	7	8	5	8	7	8	5	8	7	8	5	8	38.7	38.7	38.7	24.831	217	217	0	41.795	By matching	By MS/MS	By matching	By MS/MS	845.85	209210	226700	240590	195520	226190	210240	155190	264840	198660	1792	197020	214080	245740
P62910	P62910	5	5	5	60S ribosomal protein L32	RPL32	sp|P62910|RL32_HUMAN 60S ribosomal protein L32 OS=Homo sapiens GN=RPL32 PE=1 SV=2	1	5	5	5	3	5	3	4	3	5	3	4	3	5	3	4	26.7	26.7	26.7	15.86	135	135	0	9.654	By matching	By MS/MS	By MS/MS	By MS/MS	1504.8	108530	98429	95737	106140	107300	102760	69395	116650	94724	1558	102020	93323	100040
P62913	P62913	5	5	5	60S ribosomal protein L11	RPL11	sp|P62913|RL11_HUMAN 60S ribosomal protein L11 OS=Homo sapiens GN=RPL11 PE=1 SV=2	1	5	5	5	2	4	1	5	2	4	1	5	2	4	1	5	21.9	21.9	21.9	20.252	178	178	0	9.8514	By matching	By MS/MS	By matching	By MS/MS	200.29	100550	104040	99626	64030	77013	70599	48639	76559	51903	613.29	94393	97868	102290
P62917	P62917	12	12	12	60S ribosomal protein L8	RPL8	sp|P62917|RL8_HUMAN 60S ribosomal protein L8 OS=Homo sapiens GN=RPL8 PE=1 SV=2	1	12	12	12	6	10	4	10	6	10	4	10	6	10	4	10	42.4	42.4	42.4	28.024	257	257	0	40.291	By MS/MS	By MS/MS	By MS/MS	By MS/MS	2671.7	329150	264160	268660	235780	253750	252600	170850	241670	216170	3927.8	308790	249670	281180
P62937;P0DN37;P0DN26;A0A0B4J2A2;A0A075B759;Q9Y536;F5H284	P62937	6;1;1;1;1;1;1	6;1;1;1;1;1;1	6;1;1;1;1;1;1	Peptidyl-prolyl cis-trans isomerase A;Peptidyl-prolyl cis-trans isomerase A, N-terminally processed	PPIA	sp|P62937|PPIA_HUMAN Peptidyl-prolyl cis-trans isomerase A OS=Homo sapiens GN=PPIA PE=1 SV=2	7	6	6	6	6	4	4	4	6	4	4	4	6	4	4	4	37	37	37	18.012	165	165;164;164;164;164;164;164	0	29.1	By MS/MS	By MS/MS	By MS/MS	By MS/MS	2027.8	221580	146460	170600	139810	129710	175430	101180	119910	151990	2673.2	207530	138590	178590
P62942	P62942	1	1	1	Peptidyl-prolyl cis-trans isomerase FKBP1A	FKBP1A	sp|P62942|FKB1A_HUMAN Peptidyl-prolyl cis-trans isomerase FKBP1A OS=Homo sapiens GN=FKBP1A PE=1 SV=2	1	1	1	1	1	0	0	1	1	0	0	1	1	0	0	1	12	12	12	11.951	108	108	0	3.912	By MS/MS			By matching	0	13092	4686.8	6356.6	4617.7	4617.7	5662.2	3973.3	2602.6	4526.7	0	12225	4432.6	6990.1
P62979;P0CG47;P0CG48	P62979;P0CG47;P0CG48	6;4;4	6;4;4	2;0;0	Ubiquitin-40S ribosomal protein S27a;Ubiquitin;40S ribosomal protein S27a;Polyubiquitin-B;Ubiquitin;Polyubiquitin-C;Ubiquitin	RPS27A;UBB;UBC	sp|P62979|RS27A_HUMAN Ubiquitin-40S ribosomal protein S27a OS=Homo sapiens GN=RPS27A PE=1 SV=2;sp|P0CG47|UBB_HUMAN Polyubiquitin-B OS=Homo sapiens GN=UBB PE=1 SV=1;sp|P0CG48|UBC_HUMAN Polyubiquitin-C OS=Homo sapiens GN=UBC PE=1 SV=3	3	6	6	2	5	6	5	6	5	6	5	6	1	2	1	2	50.6	50.6	20.5	17.965	156	156;229;685	0	63.927	By MS/MS	By MS/MS	By MS/MS	By MS/MS	580.84	403990	329340	364590	512550	526630	567080	330610	387630	432630	1605.5	380740	314150	383490
P62987	P62987	5	1	1	Ubiquitin-60S ribosomal protein L40;Ubiquitin;60S ribosomal protein L40	UBA52	sp|P62987|RL40_HUMAN Ubiquitin-60S ribosomal protein L40 OS=Homo sapiens GN=UBA52 PE=1 SV=2	1	5	1	1	5	5	5	5	1	1	1	1	1	1	1	1	44.5	7.8	7.8	14.728	128	128	0	2.3805	By matching	By MS/MS	By matching	By matching	0	6910.6	7959.7	6063.4	9547.8	12586	6424.3	6331.9	1682.4	3595.2	0	6538.9	7551.9	6494.7
P62995	P62995	14	14	12	Transformer-2 protein homolog beta	TRA2B	sp|P62995|TRA2B_HUMAN Transformer-2 protein homolog beta OS=Homo sapiens GN=TRA2B PE=1 SV=1	1	14	14	12	5	14	4	13	5	14	4	13	4	12	3	11	45.5	45.5	39.2	33.665	288	288	0	155.19	By MS/MS	By MS/MS	By MS/MS	By MS/MS	734.81	404080	394210	417470	319330	318850	326290	283180	490600	394380	1718.8	379470	371910	427310
P63104	P63104	4	1	1	14-3-3 protein zeta/delta	YWHAZ	sp|P63104|1433Z_HUMAN 14-3-3 protein zeta/delta OS=Homo sapiens GN=YWHAZ PE=1 SV=1	1	4	1	1	4	4	3	4	1	1	0	1	1	1	0	1	15.5	5.7	5.7	27.745	245	245	0	9.0794	By MS/MS	By matching	By matching	By matching	0	19903	6006.8	7662.4	5190	6327.9	7403.8	6386.9	3740.9	7616.7	0	18573	5670.8	8737.8
P63167;Q96FJ2	P63167;Q96FJ2	2;1	2;1	2;1	Dynein light chain 1, cytoplasmic;Dynein light chain 2, cytoplasmic	DYNLL1;DYNLL2	sp|P63167|DYL1_HUMAN Dynein light chain 1, cytoplasmic OS=Homo sapiens GN=DYNLL1 PE=1 SV=1;sp|Q96FJ2|DYL2_HUMAN Dynein light chain 2, cytoplasmic OS=Homo sapiens GN=DYNLL2 PE=1 SV=1	2	2	2	2	1	0	1	2	1	0	1	2	1	0	1	2	25.8	25.8	25.8	10.366	89	89;89	0	3.8026	By matching		By matching	By MS/MS	75.783	18066	18677	21589	19948	21940	21820	17318	35915	30433	128.16	17034	17691	22045
P63173	P63173	2	2	2	60S ribosomal protein L38	RPL38	sp|P63173|RL38_HUMAN 60S ribosomal protein L38 OS=Homo sapiens GN=RPL38 PE=1 SV=2	1	2	2	2	1	2	1	2	1	2	1	2	1	2	1	2	31.4	31.4	31.4	8.2178	70	70	0	5.6124	By MS/MS	By MS/MS	By MS/MS	By MS/MS	315.94	29433	39031	46028	42501	46978	49456	39687	53731	51412	476.22	27876	36992	46364
P63208	P63208	2	2	2	S-phase kinase-associated protein 1	SKP1	sp|P63208|SKP1_HUMAN S-phase kinase-associated protein 1 OS=Homo sapiens GN=SKP1 PE=1 SV=2	1	2	2	2	2	1	2	1	2	1	2	1	2	1	2	1	10.4	10.4	10.4	18.658	163	163	0	2.8651	By MS/MS	By matching	By MS/MS	By MS/MS	139.34	45357	40641	46580	56566	52659	57176	39575	44196	68075	365.39	42720	38678	48159
Q9GZV4;Q6IS14;P63241	Q9GZV4;Q6IS14;P63241	1;1;1	1;1;1	1;1;1	Eukaryotic translation initiation factor 5A-2;Eukaryotic translation initiation factor 5A-1-like;Eukaryotic translation initiation factor 5A-1	EIF5A2;EIF5AL1;EIF5A	sp|Q9GZV4|IF5A2_HUMAN Eukaryotic translation initiation factor 5A-2 OS=Homo sapiens GN=EIF5A2 PE=1 SV=3;sp|Q6IS14|IF5AL_HUMAN Eukaryotic translation initiation factor 5A-1-like OS=Homo sapiens GN=EIF5AL1 PE=2 SV=2;sp|P63241|IF5A1_HUMAN Eukaryotic translati	3	1	1	1	1	1	1	1	1	1	1	1	1	1	1	1	7.8	7.8	7.8	16.793	153	153;154;154	0	2.8665	By matching	By matching	By matching	By MS/MS	438.78	11444	10664	12350	14065	13079	12605	8166.7	6051.6	12784	488.05	10780	10166	12703
P63244	P63244	1	1	1	Guanine nucleotide-binding protein subunit beta-2-like 1;Guanine nucleotide-binding protein subunit beta-2-like 1, N-terminally processed	GNB2L1	sp|P63244|RACK1_HUMAN Receptor of activated protein C kinase 1 OS=Homo sapiens GN=RACK1 PE=1 SV=3	1	1	1	1	0	1	0	0	0	1	0	0	0	1	0	0	5	5	5	35.076	317	317	0	2.5054		By MS/MS			0	2348.2	4033.2	4338.8	2851.7	4337.2	4423.3	2865.3	4326.9	2856.3	0	2230.9	3798.7	4338
P63261;P60709;P68133;P68032;P63267;P62736;Q6S8J3;A5A3E0;Q562R1;P0CG38;P0CG39;Q9BYX7	P63261;P60709;P68133;P68032;P63267;P62736	22;21;13;13;12;12;8;7;6;6;4;3	22;21;13;13;12;12;8;7;6;6;4;3	22;21;13;13;12;12;8;7;6;6;4;3	Actin, cytoplasmic 2;Actin, cytoplasmic 2, N-terminally processed;Actin, cytoplasmic 1;Actin, cytoplasmic 1, N-terminally processed;Actin, alpha skeletal muscle;Actin, alpha cardiac muscle 1;Actin, gamma-enteric smooth muscle;Actin, aortic smooth muscle	ACTG1;ACTB;ACTA1;ACTC1;ACTG2;ACTA2	sp|P63261|ACTG_HUMAN Actin, cytoplasmic 2 OS=Homo sapiens GN=ACTG1 PE=1 SV=1;sp|P60709|ACTB_HUMAN Actin, cytoplasmic 1 OS=Homo sapiens GN=ACTB PE=1 SV=1;sp|P68133|ACTS_HUMAN Actin, alpha skeletal muscle OS=Homo sapiens GN=ACTA1 PE=1 SV=1;sp|P68032|ACTC_HUM	12	22	22	22	22	20	22	21	22	20	22	21	22	20	22	21	64.8	64.8	64.8	41.792	375	375;375;377;377;376;377;1075;1075;376;1075;1038;375	0	323.31	By MS/MS	By MS/MS	By MS/MS	By MS/MS	18223	1681200	1369900	1687000	1734800	1779800	1671800	1451900	1725200	1874300	23671	1582000	1302200	1743400
P63313	P63313	1	1	1	Thymosin beta-10	TMSB10	sp|P63313|TYB10_HUMAN Thymosin beta-10 OS=Homo sapiens GN=TMSB10 PE=1 SV=2	1	1	1	1	1	1	1	1	1	1	1	1	1	1	1	1	18.2	18.2	18.2	5.0256	44	44	0.0075662	1.1944	By MS/MS	By matching	By matching	By matching	0	15567	3934.5	8160.4	5695.8	7592.1	9221.2	5359.3	3247.8	6980.8	0	14554	3746.6	8931.1
P67809;Q9Y2T7	P67809	11;2	11;2	9;0	Nuclease-sensitive element-binding protein 1	YBX1	sp|P67809|YBOX1_HUMAN Nuclease-sensitive element-binding protein 1 OS=Homo sapiens GN=YBX1 PE=1 SV=3	2	11	11	9	4	11	3	10	4	11	3	10	4	9	2	8	53.7	53.7	49.1	35.924	324	324;364	0	287.02	By MS/MS	By MS/MS	By matching	By MS/MS	305.13	142530	164190	161190	124820	142770	123260	104030	139990	117050	799.85	134130	154790	164570
P68104;Q5VTE0;Q05639	P68104;Q5VTE0;Q05639	16;16;9	16;16;9	16;16;9	Elongation factor 1-alpha 1;Putative elongation factor 1-alpha-like 3;Elongation factor 1-alpha 2	EEF1A1;EEF1A1P5;EEF1A2	sp|P68104|EF1A1_HUMAN Elongation factor 1-alpha 1 OS=Homo sapiens GN=EEF1A1 PE=1 SV=1;sp|Q5VTE0|EF1A3_HUMAN Putative elongation factor 1-alpha-like 3 OS=Homo sapiens GN=EEF1A1P5 PE=5 SV=1;sp|Q05639|EF1A2_HUMAN Elongation factor 1-alpha 2 OS=Homo sapiens GN	3	16	16	16	14	15	12	16	14	15	12	16	14	15	12	16	42	42	42	50.14	462	462;462;463	0	90.063	By MS/MS	By MS/MS	By MS/MS	By MS/MS	13027	742110	610570	617730	670640	700160	675530	523400	669390	625260	15648	697220	579320	648640
P68363;P68366;Q9H853	P68363;P68366	21;17;1	21;17;1	1;1;0	Tubulin alpha-1B chain;Tubulin alpha-4A chain	TUBA1B;TUBA4A	sp|P68363|TBA1B_HUMAN Tubulin alpha-1B chain OS=Homo sapiens GN=TUBA1B PE=1 SV=1;sp|P68366|TBA4A_HUMAN Tubulin alpha-4A chain OS=Homo sapiens GN=TUBA4A PE=1 SV=1	3	21	21	1	20	20	17	21	20	20	17	21	1	1	1	1	56.5	56.5	2.9	50.151	451	451;448;241	0	323.31	By MS/MS	By MS/MS	By MS/MS	By MS/MS	9790	1625100	1389300	1539300	1708700	1647700	1700300	1415800	1592400	1945100	13965	1528300	1319400	1597900
P68371;P04350;Q3ZCM7	P68371;P04350	22;16;9	22;16;9	3;2;1	Tubulin beta-4B chain;Tubulin beta-4A chain	TUBB4B;TUBB4A	sp|P68371|TBB4B_HUMAN Tubulin beta-4B chain OS=Homo sapiens GN=TUBB4B PE=1 SV=1;sp|P04350|TBB4A_HUMAN Tubulin beta-4A chain OS=Homo sapiens GN=TUBB4A PE=1 SV=2	3	22	22	3	19	22	20	17	19	22	20	17	3	3	3	3	53.7	53.7	9.9	49.83	445	445;444;444	0	217.48	By MS/MS	By MS/MS	By MS/MS	By MS/MS	4576.3	1259000	1017100	1146500	1255800	1212400	1202300	959300	1253200	1305700	7373.6	1183400	965790	1193100
Q71DI3;Q16695;P84243;P68431;Q6NXT2	Q71DI3;Q16695;P84243;P68431;Q6NXT2	4;4;4;4;2	4;4;4;4;2	4;4;4;4;2	Histone H3.2;Histone H3.1t;Histone H3.3;Histone H3.1;Histone H3.3C	HIST2H3A;HIST3H3;H3F3A;HIST1H3A;H3F3C	sp|Q71DI3|H32_HUMAN Histone H3.2 OS=Homo sapiens GN=HIST2H3A PE=1 SV=3;sp|Q16695|H31T_HUMAN Histone H3.1t OS=Homo sapiens GN=HIST3H3 PE=1 SV=3;sp|P84243|H33_HUMAN Histone H3.3 OS=Homo sapiens GN=H3F3A PE=1 SV=2;sp|P68431|H31_HUMAN Histone H3.1 OS=Homo sapi	5	4	4	4	4	2	3	1	4	2	3	1	4	2	3	1	19.9	19.9	19.9	15.388	136	136;136;136;136;135	0	5.9471	By MS/MS	By MS/MS	By MS/MS	By matching	13942	75963	48686	68234	74318	201710	79973	53686	53773	74997	13344	72355	47375	74582
P69849;Q15155;Q5JPE7	P69849;Q15155;Q5JPE7	3;3;3	3;3;3	3;3;3	Nodal modulator 3;Nodal modulator 1;Nodal modulator 2	NOMO3;NOMO1;NOMO2	sp|P69849|NOMO3_HUMAN Nodal modulator 3 OS=Homo sapiens GN=NOMO3 PE=3 SV=2;sp|Q15155|NOMO1_HUMAN Nodal modulator 1 OS=Homo sapiens GN=NOMO1 PE=1 SV=5;sp|Q5JPE7|NOMO2_HUMAN Nodal modulator 2 OS=Homo sapiens GN=NOMO2 PE=1 SV=1	3	3	3	3	2	2	2	2	2	2	2	2	2	2	2	2	2.1	2.1	2.1	134.13	1222	1222;1222;1267	0	4.2275	By MS/MS	By MS/MS	By MS/MS	By MS/MS	0	17595	13131	16917	19680	18892	20208	16926	23728	24023	0	16557	12513	17563
P78371	P78371	13	13	13	T-complex protein 1 subunit beta	CCT2	sp|P78371|TCPB_HUMAN T-complex protein 1 subunit beta OS=Homo sapiens GN=CCT2 PE=1 SV=4	1	13	13	13	7	9	9	8	7	9	9	8	7	9	9	8	32	32	32	57.488	535	535	0	34.877	By MS/MS	By MS/MS	By MS/MS	By MS/MS	491.93	161780	125660	145280	247990	158020	185160	122190	143860	190870	692.91	152070	120620	151470
P78527	P78527	49	49	49	DNA-dependent protein kinase catalytic subunit	PRKDC	sp|P78527|PRKDC_HUMAN DNA-dependent protein kinase catalytic subunit OS=Homo sapiens GN=PRKDC PE=1 SV=3	1	49	49	49	23	37	25	43	23	37	25	43	23	37	25	43	13.3	13.3	13.3	469.08	4128	4128	0	179.12	By MS/MS	By MS/MS	By MS/MS	By MS/MS	2530.8	745940	682650	747840	770790	777510	695970	548680	856580	782950	4074.7	701840	647180	772600
P81605	P81605	6	6	6	Dermcidin;Survival-promoting peptide;DCD-1	DCD	sp|P81605|DCD_HUMAN Dermcidin OS=Homo sapiens GN=DCD PE=1 SV=2	1	6	6	6	4	6	4	5	4	6	4	5	4	6	4	5	42.7	42.7	42.7	11.284	110	110	0	14.95	By MS/MS	By MS/MS	By MS/MS	By MS/MS	398.85	155560	175270	199920	205200	202000	247850	181990	250740	163620	1052.3	146830	166250	203290
P82650	P82650	1	1	1	28S ribosomal protein S22, mitochondrial	MRPS22	sp|P82650|RT22_HUMAN 28S ribosomal protein S22, mitochondrial OS=Homo sapiens GN=MRPS22 PE=1 SV=1	1	1	1	1	1	1	0	1	1	1	0	1	1	1	0	1	3.1	3.1	3.1	41.28	360	360	0	1.7636	By matching	By matching		By MS/MS	0	5974.1	5352.8	5754.6	4577.8	5323.8	4069.5	3559.6	5895.7	4754.3	0	5613.3	5052.7	5943.9
P83731	P83731	8	8	8	60S ribosomal protein L24	RPL24	sp|P83731|RL24_HUMAN 60S ribosomal protein L24 OS=Homo sapiens GN=RPL24 PE=1 SV=1	1	8	8	8	5	8	5	7	5	8	5	7	5	8	5	7	41.4	41.4	41.4	17.779	157	157	0	33.122	By MS/MS	By MS/MS	By MS/MS	By MS/MS	1612.6	350400	337440	335240	413130	452140	377970	298590	419740	362050	3338.3	330270	320380	350270
P83881;Q969Q0	P83881	3;1	3;1	3;1	60S ribosomal protein L36a	RPL36A	sp|P83881|RL36A_HUMAN 60S ribosomal protein L36a OS=Homo sapiens GN=RPL36A PE=1 SV=2	2	3	3	3	2	3	2	3	2	3	2	3	2	3	2	3	17.9	17.9	17.9	12.441	106	106;106	0	8.8672	By MS/MS	By MS/MS	By MS/MS	By MS/MS	349.54	130120	109060	118580	118030	134030	129960	89171	136640	109430	587.73	122370	103310	123630
P84090	P84090	9	9	9	Enhancer of rudimentary homolog	ERH	sp|P84090|ERH_HUMAN Enhancer of rudimentary homolog OS=Homo sapiens GN=ERH PE=1 SV=1	1	9	9	9	6	9	7	9	6	9	7	9	6	9	7	9	62.5	62.5	62.5	12.259	104	104	0	105.29	By MS/MS	By MS/MS	By MS/MS	By MS/MS	1861	593630	599950	672770	550220	545370	549960	428440	617500	582020	4171	558280	566960	685420
P84098	P84098	10	10	10	60S ribosomal protein L19	RPL19	sp|P84098|RL19_HUMAN 60S ribosomal protein L19 OS=Homo sapiens GN=RPL19 PE=1 SV=1	1	10	10	10	6	10	6	10	6	10	6	10	6	10	6	10	39.3	39.3	39.3	23.466	196	196	0	33.209	By MS/MS	By MS/MS	By MS/MS	By MS/MS	800.66	239320	198950	199310	292910	293930	240410	197570	258300	240040	1162.3	225350	189570	211110
P84103	P84103	12	11	11	Serine/arginine-rich splicing factor 3	SRSF3	sp|P84103|SRSF3_HUMAN Serine/arginine-rich splicing factor 3 OS=Homo sapiens GN=SRSF3 PE=1 SV=1	1	12	11	11	2	11	0	11	2	10	0	10	2	10	0	10	46.3	46.3	46.3	19.329	164	164	0	37.254	By matching	By MS/MS		By MS/MS	303.75	321920	332560	334400	241490	292480	277360	260340	454760	338870	1824.5	302610	313330	343160
P98175;P78332	P98175	57;1	57;1	53;1	RNA-binding protein 10	RBM10	sp|P98175|RBM10_HUMAN RNA-binding protein 10 OS=Homo sapiens GN=RBM10 PE=1 SV=3	2	57	57	53	34	57	40	53	34	57	40	53	31	53	36	49	54.2	54.2	51.5	103.53	930	930;1123	0	323.31	By MS/MS	By MS/MS	By MS/MS	By MS/MS	6430.5	2515500	2421300	2455100	2152700	2395100	2193000	1845600	2668900	2223600	15464	2364900	2287100	2536900
Q00325	Q00325	9	9	9	Phosphate carrier protein, mitochondrial	SLC25A3	sp|Q00325|MPCP_HUMAN Phosphate carrier protein, mitochondrial OS=Homo sapiens GN=SLC25A3 PE=1 SV=2	1	9	9	9	6	9	7	9	6	9	7	9	6	9	7	9	22.4	22.4	22.4	40.094	362	362	0	40.277	By MS/MS	By MS/MS	By MS/MS	By MS/MS	2000.7	447550	398630	432110	535280	444240	454530	361520	485310	472500	3702.5	420860	379140	447450
Q00610;P53675	Q00610	7;2	7;2	7;2	Clathrin heavy chain 1	CLTC	sp|Q00610|CLH1_HUMAN Clathrin heavy chain 1 OS=Homo sapiens GN=CLTC PE=1 SV=5	2	7	7	7	1	7	0	5	1	7	0	5	1	7	0	5	4.4	4.4	4.4	191.61	1675	1675;1640	0	23.381	By matching	By MS/MS		By MS/MS	290.94	54827	47450	52002	39424	44744	42259	34038	64670	50930	514.36	51482	44794	53680
Q00839	Q00839	18	18	18	Heterogeneous nuclear ribonucleoprotein U	HNRNPU	sp|Q00839|HNRPU_HUMAN Heterogeneous nuclear ribonucleoprotein U OS=Homo sapiens GN=HNRNPU PE=1 SV=6	1	18	18	18	7	16	4	15	7	16	4	15	7	16	4	15	20.4	20.4	20.4	90.583	825	825	0	113.81	By matching	By MS/MS	By matching	By MS/MS	1325.2	323130	354580	373970	372620	447460	403830	300770	506340	335270	2617.8	305040	335770	384410
Q01082;Q9H254	Q01082	34;1	34;1	31;0	Spectrin beta chain, non-erythrocytic 1	SPTBN1	sp|Q01082|SPTB2_HUMAN Spectrin beta chain, non-erythrocytic 1 OS=Homo sapiens GN=SPTBN1 PE=1 SV=2	2	34	34	31	9	30	15	30	9	30	15	30	8	27	13	27	17.8	17.8	16.7	274.61	2364	2364;2564	0	175.97	By MS/MS	By MS/MS	By MS/MS	By MS/MS	1719.2	626940	590820	628680	481540	574120	506760	390550	640270	502460	3708.8	589290	557490	647340
Q01130;Q9BRL6	Q01130	5;2	5;2	4;2	Serine/arginine-rich splicing factor 2	SRSF2	sp|Q01130|SRSF2_HUMAN Serine/arginine-rich splicing factor 2 OS=Homo sapiens GN=SRSF2 PE=1 SV=4	2	5	5	4	3	5	0	4	3	5	0	4	3	4	0	4	17.6	17.6	10.4	25.476	221	221;282	0	5.2631	By matching	By MS/MS		By MS/MS	149.2	48174	37177	37316	26273	27828	28427	24346	42636	33387	303.64	45118	35026	39029
Q01650;Q9UM01;Q92536	Q01650;Q9UM01;Q92536	2;1;1	2;1;1	2;1;1	Large neutral amino acids transporter small subunit 1;Y+L amino acid transporter 1;Y+L amino acid transporter 2	SLC7A5;SLC7A7;SLC7A6	sp|Q01650|LAT1_HUMAN Large neutral amino acids transporter small subunit 1 OS=Homo sapiens GN=SLC7A5 PE=1 SV=2;sp|Q9UM01|YLAT1_HUMAN Y+L amino acid transporter 1 OS=Homo sapiens GN=SLC7A7 PE=1 SV=2;sp|Q92536|YLAT2_HUMAN Y+L amino acid transporter 2 OS=Homo	3	2	2	2	2	1	1	2	2	1	1	2	2	1	1	2	4.9	4.9	4.9	55.01	507	507;511;515	0	2.6102	By MS/MS	By MS/MS	By matching	By MS/MS	312.73	41135	31438	37766	46133	54582	46199	43280	64195	54847	484.75	38778	29967	39675
Q01804	Q01804	28	28	28	OTU domain-containing protein 4	OTUD4	sp|Q01804|OTUD4_HUMAN OTU domain-containing protein 4 OS=Homo sapiens GN=OTUD4 PE=1 SV=4	1	28	28	28	22	17	28	10	22	17	28	10	22	17	28	10	29.7	29.7	29.7	124.04	1114	1114	0	266.77	By MS/MS	By MS/MS	By MS/MS	By MS/MS	1917.9	615480	466320	549250	843520	601900	563030	471740	439590	789510	3450.6	578550	446540	573050
Q02543	Q02543	8	8	8	60S ribosomal protein L18a	RPL18A	sp|Q02543|RL18A_HUMAN 60S ribosomal protein L18a OS=Homo sapiens GN=RPL18A PE=1 SV=2	1	8	8	8	2	8	3	8	2	8	3	8	2	8	3	8	39.8	39.8	39.8	20.762	176	176	0	52.355	By MS/MS	By MS/MS	By MS/MS	By MS/MS	878.14	181090	169830	189130	187480	185700	188010	121230	178290	155550	1210.1	170390	160960	194560
Q02878	Q02878	13	13	13	60S ribosomal protein L6	RPL6	sp|Q02878|RL6_HUMAN 60S ribosomal protein L6 OS=Homo sapiens GN=RPL6 PE=1 SV=3	1	13	13	13	7	12	3	12	7	12	3	12	7	12	3	12	40.6	40.6	40.6	32.728	288	288	0	57.576	By MS/MS	By MS/MS	By MS/MS	By MS/MS	1222.7	414700	319810	341410	339160	359460	326930	256270	381940	324980	2329.7	389370	302880	358080
Q02978	Q02978	3	3	3	Mitochondrial 2-oxoglutarate/malate carrier protein	SLC25A11	sp|Q02978|M2OM_HUMAN Mitochondrial 2-oxoglutarate/malate carrier protein OS=Homo sapiens GN=SLC25A11 PE=1 SV=3	1	3	3	3	2	3	2	3	2	3	2	3	2	3	2	3	17.8	17.8	17.8	34.061	314	314	0	29.452	By matching	By MS/MS	By MS/MS	By MS/MS	0	29463	28826	31828	34461	26811	30655	24440	33987	33354	0	27701	27348	32550
Q03252;P20700	Q03252;P20700	2;1	2;1	2;1	Lamin-B2;Lamin-B1	LMNB2;LMNB1	sp|Q03252|LMNB2_HUMAN Lamin-B2 OS=Homo sapiens GN=LMNB2 PE=1 SV=4;sp|P20700|LMNB1_HUMAN Lamin-B1 OS=Homo sapiens GN=LMNB1 PE=1 SV=2	2	2	2	2	2	2	2	0	2	2	2	0	2	2	2	0	2.9	2.9	2.9	69.948	620	620;586	0	1.7715	By matching	By matching	By MS/MS		0	19498	14246	15212	22466	15582	22173	15619	16682	26830	0	18294	13591	16015
Q03393	Q03393	3	3	3	6-pyruvoyl tetrahydrobiopterin synthase	PTS	sp|Q03393|PTPS_HUMAN 6-pyruvoyl tetrahydrobiopterin synthase OS=Homo sapiens GN=PTS PE=1 SV=1	1	3	3	3	2	3	3	3	2	3	3	3	2	3	3	3	21.4	21.4	21.4	16.386	145	145	0	6.7251	By matching	By MS/MS	By MS/MS	By MS/MS	407.48	99920	97705	98882	94510	80968	79777	61315	103480	84802	805.69	93836	92409	101660
Q04760	Q04760	1	1	1	Lactoylglutathione lyase	GLO1	sp|Q04760|LGUL_HUMAN Lactoylglutathione lyase OS=Homo sapiens GN=GLO1 PE=1 SV=4	1	1	1	1	1	1	1	1	1	1	1	1	1	1	1	1	4.3	4.3	4.3	20.777	184	184	0	1.905	By MS/MS	By MS/MS	By matching	By MS/MS	367.79	38051	33705	40560	34513	38699	38650	34018	39582	39851	543.62	35803	31921	41639
Q05519	Q05519	1	1	1	Serine/arginine-rich splicing factor 11	SRSF11	sp|Q05519|SRS11_HUMAN Serine/arginine-rich splicing factor 11 OS=Homo sapiens GN=SRSF11 PE=1 SV=1	1	1	1	1	1	1	0	1	1	1	0	1	1	1	0	1	1.7	1.7	1.7	53.542	484	484	0.0039422	1.3765	By matching	By MS/MS		By matching	181.62	7286	7793.8	8607	5419.5	6011.2	7193.9	4689.7	7318.5	7255.6	227.22	6848.3	7352	8720.9
Q99496;Q06587	Q99496;Q06587	1;1	1;1	1;1	E3 ubiquitin-protein ligase RING2;E3 ubiquitin-protein ligase RING1	RNF2;RING1	sp|Q99496|RING2_HUMAN E3 ubiquitin-protein ligase RING2 OS=Homo sapiens GN=RNF2 PE=1 SV=1;sp|Q06587|RING1_HUMAN E3 ubiquitin-protein ligase RING1 OS=Homo sapiens GN=RING1 PE=1 SV=2	2	1	1	1	1	1	0	0	1	1	0	0	1	1	0	0	4.2	4.2	4.2	37.655	336	336;406	0.0074349	1.1599	By MS/MS	By matching			0	7637	5666.4	8794.8	7938	11359	9165.6	10176	5511.3	13500	0	7215.1	5392	9065.6
Q06787	Q06787	5	5	5	Fragile X mental retardation protein 1	FMR1	sp|Q06787|FMR1_HUMAN Synaptic functional regulator FMR1 OS=Homo sapiens GN=FMR1 PE=1 SV=1	1	5	5	5	0	3	0	5	0	3	0	5	0	3	0	5	8.2	8.2	8.2	71.174	632	632	0	14.345		By MS/MS		By MS/MS	213.11	52759	64000	66785	56074	71461	44626	52013	78344	52645	508.66	49815	60446	68072
Q06830;Q13162	Q06830	14;3	14;3	13;3	Peroxiredoxin-1	PRDX1	sp|Q06830|PRDX1_HUMAN Peroxiredoxin-1 OS=Homo sapiens GN=PRDX1 PE=1 SV=1	2	14	14	13	10	12	11	12	10	12	11	12	9	11	10	11	66.8	66.8	61.3	22.11	199	199;271	0	74.77	By MS/MS	By MS/MS	By MS/MS	By MS/MS	2365	877000	798380	872820	857900	844720	903630	660920	816420	953090	5087.8	824610	756230	900470
Q07020	Q07020	8	8	8	60S ribosomal protein L18	RPL18	sp|Q07020|RL18_HUMAN 60S ribosomal protein L18 OS=Homo sapiens GN=RPL18 PE=1 SV=2	1	8	8	8	5	8	3	7	5	8	3	7	5	8	3	7	45.7	45.7	45.7	21.634	188	188	0	92.187	By MS/MS	By MS/MS	By matching	By MS/MS	908.6	234350	217690	229760	202440	238210	218300	151060	232960	176780	1447.4	220430	205780	237720
Q07065	Q07065	4	4	4	Cytoskeleton-associated protein 4	CKAP4	sp|Q07065|CKAP4_HUMAN Cytoskeleton-associated protein 4 OS=Homo sapiens GN=CKAP4 PE=1 SV=2	1	4	4	4	1	4	3	4	1	4	3	4	1	4	3	4	8.1	8.1	8.1	66.022	602	602	0	13.251	By matching	By MS/MS	By matching	By MS/MS	258.58	42932	44618	47534	41646	47959	49928	38489	62399	48556	302.54	40434	42183	48752
Q07955	Q07955	19	19	18	Serine/arginine-rich splicing factor 1	SRSF1	sp|Q07955|SRSF1_HUMAN Serine/arginine-rich splicing factor 1 OS=Homo sapiens GN=SRSF1 PE=1 SV=2	1	19	19	18	3	19	2	19	3	19	2	19	3	18	1	18	58.5	58.5	55.6	27.744	248	248	0	158.77	By MS/MS	By MS/MS	By matching	By MS/MS	2260.2	787810	750740	774930	470110	676500	535630	542430	774820	630140	5213.5	740100	706400	798140
Q08170;P49589	Q08170	11;1	7;1	7;1	Serine/arginine-rich splicing factor 4	SRSF4	sp|Q08170|SRSF4_HUMAN Serine/arginine-rich splicing factor 4 OS=Homo sapiens GN=SRSF4 PE=1 SV=2	2	11	7	7	2	11	2	11	0	7	1	7	0	7	1	7	22.3	15.2	15.2	56.678	494	494;748	0	11.115	By matching	By MS/MS	By matching	By MS/MS	208.68	146900	151190	174430	104980	132410	125980	127090	209320	162140	557.41	138170	142390	176970
Q08211	Q08211	1	1	1	ATP-dependent RNA helicase A	DHX9	sp|Q08211|DHX9_HUMAN ATP-dependent RNA helicase A OS=Homo sapiens GN=DHX9 PE=1 SV=4	1	1	1	1	0	1	0	0	0	1	0	0	0	1	0	0	0.8	0.8	0.8	140.96	1270	1270	0.0040486	1.5668		By MS/MS			0	5442.4	5135.8	6150.6	4807	5471.3	5452.7	3741.7	5821.3	3435.4	0	5121.8	4853.7	6280.4
Q08378	Q08378	60	60	60	Golgin subfamily A member 3	GOLGA3	sp|Q08378|GOGA3_HUMAN Golgin subfamily A member 3 OS=Homo sapiens GN=GOLGA3 PE=1 SV=2	1	60	60	60	45	56	45	55	45	56	45	55	45	56	45	55	47.5	47.5	47.5	167.35	1498	1498	0	323.31	By MS/MS	By MS/MS	By MS/MS	By MS/MS	7451.2	2236300	2107100	2301300	2015100	2002800	1946800	1546500	1853700	2127900	15676	2101900	1992500	2362800
Q16576;Q09028	Q16576;Q09028	4;4	4;4	4;4	Histone-binding protein RBBP7;Histone-binding protein RBBP4	RBBP7;RBBP4	sp|Q16576|RBBP7_HUMAN Histone-binding protein RBBP7 OS=Homo sapiens GN=RBBP7 PE=1 SV=1;sp|Q09028|RBBP4_HUMAN Histone-binding protein RBBP4 OS=Homo sapiens GN=RBBP4 PE=1 SV=3	2	4	4	4	4	4	2	3	4	4	2	3	4	4	2	3	8.7	8.7	8.7	47.82	425	425;425	0	6.6721	By MS/MS	By MS/MS	By matching	By MS/MS	389.34	90535	61266	73934	62580	76973	75755	73002	53620	87518	605.37	84990	58001	77571
Q09161	Q09161	8	8	8	Nuclear cap-binding protein subunit 1	NCBP1	sp|Q09161|NCBP1_HUMAN Nuclear cap-binding protein subunit 1 OS=Homo sapiens GN=NCBP1 PE=1 SV=1	1	8	8	8	0	7	0	6	0	7	0	6	0	7	0	6	14.1	14.1	14.1	91.838	790	790	0	27.858		By MS/MS		By MS/MS	475.79	117920	123500	134080	81759	91033	96219	72196	131690	98041	1135.1	110770	116270	136090
Q12874	Q12874	1	1	1	Splicing factor 3A subunit 3	SF3A3	sp|Q12874|SF3A3_HUMAN Splicing factor 3A subunit 3 OS=Homo sapiens GN=SF3A3 PE=1 SV=1	1	1	1	1	0	1	0	1	0	1	0	1	0	1	0	1	1.8	1.8	1.8	58.848	501	501	0.0040107	1.5044		By MS/MS		By matching	52.406	10884	13067	12809	4169.1	4889.1	6118.8	4045	6272	4642	146.22	10200	12240	12872
Q12904	Q12904	2	2	2	Aminoacyl tRNA synthase complex-interacting multifunctional protein 1;Endothelial monocyte-activating polypeptide 2	AIMP1	sp|Q12904|AIMP1_HUMAN Aminoacyl tRNA synthase complex-interacting multifunctional protein 1 OS=Homo sapiens GN=AIMP1 PE=1 SV=2	1	2	2	2	2	2	2	2	2	2	2	2	2	2	2	2	7.4	7.4	7.4	34.352	312	312	0	4.8703	By matching	By MS/MS	By matching	By MS/MS	94.913	30478	26693	31127	27633	29967	28720	22867	39389	30157	134.04	28665	25271	32053
Q12905	Q12905	2	2	2	Interleukin enhancer-binding factor 2	ILF2	sp|Q12905|ILF2_HUMAN Interleukin enhancer-binding factor 2 OS=Homo sapiens GN=ILF2 PE=1 SV=2	1	2	2	2	0	1	0	2	0	1	0	2	0	1	0	2	8.7	8.7	8.7	43.062	390	390	0	9.2572		By MS/MS		By MS/MS	0	2505.6	3061.5	3192.5	2428.9	2969	3592.7	2249.7	3539	2040.9	0	2362.6	2887.3	3240.8
Q12906	Q12906	2	2	2	Interleukin enhancer-binding factor 3	ILF3	sp|Q12906|ILF3_HUMAN Interleukin enhancer-binding factor 3 OS=Homo sapiens GN=ILF3 PE=1 SV=3	1	2	2	2	0	2	0	2	0	2	0	2	0	2	0	2	2.6	2.6	2.6	95.337	894	894	0	3.8844		By MS/MS		By MS/MS	0	7547.9	8593.4	9616.4	6528.9	7328.1	7194.7	4535.1	8280.9	7742.2	0	7105.3	8100.2	9718.3
Q12907	Q12907	1	1	1	Vesicular integral-membrane protein VIP36	LMAN2	sp|Q12907|LMAN2_HUMAN Vesicular integral-membrane protein VIP36 OS=Homo sapiens GN=LMAN2 PE=1 SV=1	1	1	1	1	1	1	1	1	1	1	1	1	1	1	1	1	2.8	2.8	2.8	40.228	356	356	0.0040268	1.5117	By matching	By MS/MS	By matching	By matching	0	7805.1	9757.6	9937.2	7308	9876	10499	6917.3	10277	5896.1	0	7364.5	9196.1	10105
Q13200	Q13200	13	13	13	26S proteasome non-ATPase regulatory subunit 2	PSMD2	sp|Q13200|PSMD2_HUMAN 26S proteasome non-ATPase regulatory subunit 2 OS=Homo sapiens GN=PSMD2 PE=1 SV=3	1	13	13	13	7	12	4	13	7	12	4	13	7	12	4	13	18.7	18.7	18.7	100.2	908	908	0	73.561	By matching	By MS/MS	By MS/MS	By MS/MS	1160.6	243170	233190	255310	204290	216650	212420	164500	279290	212400	1840.3	228560	220270	261630
Q13242	Q13242	12	11	11	Serine/arginine-rich splicing factor 9	SRSF9	sp|Q13242|SRSF9_HUMAN Serine/arginine-rich splicing factor 9 OS=Homo sapiens GN=SRSF9 PE=1 SV=1	1	12	11	11	2	12	2	12	2	11	1	11	2	11	1	11	54.3	51.1	51.1	25.542	221	221	0	61.081	By matching	By MS/MS	By matching	By MS/MS	688.83	223200	209750	218140	152130	175840	165840	148800	246900	200130	1432.1	209560	197660	224380
Q13243	Q13243	6	5	5	Serine/arginine-rich splicing factor 5	SRSF5	sp|Q13243|SRSF5_HUMAN Serine/arginine-rich splicing factor 5 OS=Homo sapiens GN=SRSF5 PE=1 SV=1	1	6	5	5	2	6	3	6	2	5	2	5	2	5	2	5	19.5	16.2	16.2	31.263	272	272	0	9.5285	By matching	By MS/MS	By matching	By MS/MS	112.47	70515	79026	83174	63818	77565	64769	61646	98969	63499	227.76	66423	74551	84808
Q13247	Q13247	16	16	12	Serine/arginine-rich splicing factor 6	SRSF6	sp|Q13247|SRSF6_HUMAN Serine/arginine-rich splicing factor 6 OS=Homo sapiens GN=SRSF6 PE=1 SV=2	1	16	16	12	2	16	3	16	2	16	3	16	0	12	2	12	36	36	29.4	39.586	344	344	0	76.652	By MS/MS	By MS/MS	By matching	By MS/MS	1299.9	618850	677010	685420	434650	529220	500830	485760	800630	584240	4185.5	581650	637130	698580
Q13257	Q13257	1	1	1	Mitotic spindle assembly checkpoint protein MAD2A	MAD2L1	sp|Q13257|MD2L1_HUMAN Mitotic spindle assembly checkpoint protein MAD2A OS=Homo sapiens GN=MAD2L1 PE=1 SV=1	1	1	1	1	1	0	0	0	1	0	0	0	1	0	0	0	3.9	3.9	3.9	23.51	205	205	0.0085575	1.1195	By MS/MS				131.02	7201.6	3395	6249.6	6651.2	15100	4788.3	9839.4	3980.7	17914	147.3	6828.8	3266.2	6757.2
Q13310	Q13310	29	16	14	Polyadenylate-binding protein 4	PABPC4	sp|Q13310|PABP4_HUMAN Polyadenylate-binding protein 4 OS=Homo sapiens GN=PABPC4 PE=1 SV=1	1	29	16	14	16	26	12	26	9	14	5	13	8	13	5	12	44.7	24.4	22.8	70.782	644	644	0	100.11	By MS/MS	By MS/MS	By matching	By MS/MS	1385.2	427720	446190	457720	374040	456030	401330	333870	514580	374230	2998.7	402620	421170	470300
Q13347	Q13347	5	5	5	Eukaryotic translation initiation factor 3 subunit I	EIF3I	sp|Q13347|EIF3I_HUMAN Eukaryotic translation initiation factor 3 subunit I OS=Homo sapiens GN=EIF3I PE=1 SV=1	1	5	5	5	4	5	3	4	4	5	3	4	4	5	3	4	15.7	15.7	15.7	36.501	325	325	0	12.087	By matching	By MS/MS	By MS/MS	By MS/MS	234.79	126060	120320	125940	107330	114140	116160	87204	148990	124560	530.07	118480	113660	129680
Q13367	Q13367	3	3	3	AP-3 complex subunit beta-2	AP3B2	sp|Q13367|AP3B2_HUMAN AP-3 complex subunit beta-2 OS=Homo sapiens GN=AP3B2 PE=1 SV=2	1	3	3	3	0	3	0	3	0	3	0	3	0	3	0	3	3.4	3.4	3.4	119.06	1082	1082	0	15.12		By MS/MS		By MS/MS	93.596	20286	23564	22658	22778	23423	20455	16874	37155	24250	143.97	19112	22286	23241
Q13409	Q13409	1	1	1	Cytoplasmic dynein 1 intermediate chain 2	DYNC1I2	sp|Q13409|DC1I2_HUMAN Cytoplasmic dynein 1 intermediate chain 2 OS=Homo sapiens GN=DYNC1I2 PE=1 SV=3	1	1	1	1	0	1	0	1	0	1	0	1	0	1	0	1	1.1	1.1	1.1	71.456	638	638	0.0051613	1.2917		By MS/MS		By matching	54.94	15626	15978	17257	11002	13588	12861	10894	17382	8140.2	170.28	14688	15049	17598
Q13427	Q13427	1	1	1	Peptidyl-prolyl cis-trans isomerase G	PPIG	sp|Q13427|PPIG_HUMAN Peptidyl-prolyl cis-trans isomerase G OS=Homo sapiens GN=PPIG PE=1 SV=2	1	1	1	1	0	0	0	1	0	0	0	1	0	0	0	1	0.9	0.9	0.9	88.616	754	754	0.0085784	1.1303				By MS/MS	0	5581.9	3355.7	3334.8	3292.2	3850.7	2741	3837.8	5126.2	5069	0	5228.8	3173.5	3614.9
Q13435	Q13435	22	22	22	Splicing factor 3B subunit 2	SF3B2	sp|Q13435|SF3B2_HUMAN Splicing factor 3B subunit 2 OS=Homo sapiens GN=SF3B2 PE=1 SV=2	1	22	22	22	8	20	3	21	8	20	3	21	8	20	3	21	24.7	24.7	24.7	100.23	895	895	0	155.85	By matching	By MS/MS	By matching	By MS/MS	1167.1	414560	471350	493740	442810	538850	491180	363430	569540	440340	2648.3	391140	445570	505270
Q13464	Q13464	1	1	1	Rho-associated protein kinase 1	ROCK1	sp|Q13464|ROCK1_HUMAN Rho-associated protein kinase 1 OS=Homo sapiens GN=ROCK1 PE=1 SV=1	1	1	1	1	1	1	1	1	1	1	1	1	1	1	1	1	0.7	0.7	0.7	158.17	1354	1354	0.004065	1.588	By matching	By matching	By matching	By MS/MS	101.37	11413	12314	16085	9224.6	10500	9914.7	7918.7	15599	13856	186.19	10745	11613	16122
Q13547;Q92769	Q13547	3;1	3;1	3;1	Histone deacetylase 1	HDAC1	sp|Q13547|HDAC1_HUMAN Histone deacetylase 1 OS=Homo sapiens GN=HDAC1 PE=1 SV=1	2	3	3	3	2	3	2	2	2	3	2	2	2	3	2	2	6	6	6	55.102	482	482;488	0	4.0593	By matching	By MS/MS	By matching	By MS/MS	28.288	47858	42351	44496	32258	38008	35030	27331	42592	35655	129.68	44927	39923	45992
Q13561	Q13561	3	3	3	Dynactin subunit 2	DCTN2	sp|Q13561|DCTN2_HUMAN Dynactin subunit 2 OS=Homo sapiens GN=DCTN2 PE=1 SV=4	1	3	3	3	0	3	2	1	0	3	2	1	0	3	2	1	6	6	6	44.23	401	401	0	2.7885		By MS/MS	By matching	By MS/MS	315.69	36695	32356	34504	26884	33360	29900	23702	39767	31563	535.18	34481	30553	35739
Q13573	Q13573	2	2	2	SNW domain-containing protein 1	SNW1	sp|Q13573|SNW1_HUMAN SNW domain-containing protein 1 OS=Homo sapiens GN=SNW1 PE=1 SV=1	1	2	2	2	0	2	0	2	0	2	0	2	0	2	0	2	5.8	5.8	5.8	61.494	536	536	0	5.5987		By MS/MS		By MS/MS	102.28	17847	22159	22868	14194	15755	17120	12982	19194	12603	201.39	16789	20857	23058
Q13595	Q13595	13	11	11	Transformer-2 protein homolog alpha	TRA2A	sp|Q13595|TRA2A_HUMAN Transformer-2 protein homolog alpha OS=Homo sapiens GN=TRA2A PE=1 SV=1	1	13	11	11	5	12	5	11	4	10	4	9	4	10	4	9	43.3	36.9	36.9	32.688	282	282	0	41.964	By matching	By MS/MS	By matching	By MS/MS	691.45	163300	147250	150070	111950	123070	118710	100710	177400	124630	1454.8	153250	138840	155110
Q13610	Q13610	2	2	2	Periodic tryptophan protein 1 homolog	PWP1	sp|Q13610|PWP1_HUMAN Periodic tryptophan protein 1 homolog OS=Homo sapiens GN=PWP1 PE=1 SV=1	1	2	2	2	1	2	1	1	1	2	1	1	1	2	1	1	2.8	2.8	2.8	55.827	501	501	0	2.5779	By matching	By MS/MS	By matching	By matching	106.86	20994	21034	20904	14832	17732	17574	13987	17846	11488	256.32	19722	19818	21498
Q13724	Q13724	2	2	2	Mannosyl-oligosaccharide glucosidase	MOGS	sp|Q13724|MOGS_HUMAN Mannosyl-oligosaccharide glucosidase OS=Homo sapiens GN=MOGS PE=1 SV=5	1	2	2	2	1	1	1	2	1	1	1	2	1	1	1	2	3	3	3	91.916	837	837	0	3.1057	By MS/MS	By matching	By MS/MS	By MS/MS	53.045	23737	16934	24288	31118	22409	26092	20592	15749	30616	124.99	22318	16222	24980
Q13813	Q13813	43	43	42	Spectrin alpha chain, non-erythrocytic 1	SPTAN1	sp|Q13813|SPTN1_HUMAN Spectrin alpha chain, non-erythrocytic 1 OS=Homo sapiens GN=SPTAN1 PE=1 SV=3	1	43	43	42	21	36	16	37	21	36	16	37	21	36	16	37	19.1	19.1	18.8	284.54	2472	2472	0	225.23	By MS/MS	By MS/MS	By matching	By MS/MS	1460	614460	607500	690700	605860	580640	529100	380830	628860	493490	3212.9	577960	574750	704590
Q13885;Q9BVA1;Q9BUF5	Q13885;Q9BVA1	20;20;8	3;3;1	3;3;1	Tubulin beta-2A chain;Tubulin beta-2B chain	TUBB2A;TUBB2B	sp|Q13885|TBB2A_HUMAN Tubulin beta-2A chain OS=Homo sapiens GN=TUBB2A PE=1 SV=1;sp|Q9BVA1|TBB2B_HUMAN Tubulin beta-2B chain OS=Homo sapiens GN=TUBB2B PE=1 SV=1	3	20	3	3	16	20	16	15	2	3	1	3	2	3	1	3	47.2	8.1	8.1	49.906	445	445;445;446	0	6.2848	By matching	By MS/MS	By matching	By MS/MS	458.77	75259	68560	65370	48667	55610	53620	44872	81074	61259	670.29	70602	64608	67911
Q14011	Q14011	5	5	5	Cold-inducible RNA-binding protein	CIRBP	sp|Q14011|CIRBP_HUMAN Cold-inducible RNA-binding protein OS=Homo sapiens GN=CIRBP PE=1 SV=1	1	5	5	5	0	5	0	5	0	5	0	5	0	5	0	5	32	32	32	18.648	172	172	0	31.424		By MS/MS		By MS/MS	356.92	62731	62361	65091	60467	67609	64951	49687	87065	60442	499.17	59047	58990	67089
Q14103	Q14103	3	3	2	Heterogeneous nuclear ribonucleoprotein D0	HNRNPD	sp|Q14103|HNRPD_HUMAN Heterogeneous nuclear ribonucleoprotein D0 OS=Homo sapiens GN=HNRNPD PE=1 SV=1	1	3	3	2	2	3	2	2	2	3	2	2	1	2	1	1	9	9	6.8	38.434	355	355	0	8.1926	By MS/MS	By MS/MS	By matching	By MS/MS	1086.1	121460	80815	92970	47460	53970	54587	41455	62171	54514	1569	113630	76056	96925
Q14152	Q14152	15	15	15	Eukaryotic translation initiation factor 3 subunit A	EIF3A	sp|Q14152|EIF3A_HUMAN Eukaryotic translation initiation factor 3 subunit A OS=Homo sapiens GN=EIF3A PE=1 SV=1	1	15	15	15	4	9	2	13	4	9	2	13	4	9	2	13	13.5	13.5	13.5	166.57	1382	1382	0	24.746	By matching	By MS/MS	By matching	By MS/MS	348.67	134660	120680	136000	107560	119380	105980	94082	161490	135790	739.36	126540	114000	139840
Q14160	Q14160	2	2	2	Protein scribble homolog	SCRIB	sp|Q14160|SCRIB_HUMAN Protein scribble homolog OS=Homo sapiens GN=SCRIB PE=1 SV=4	1	2	2	2	0	2	1	1	0	2	1	1	0	2	1	1	1	1	1	174.88	1630	1630	0.0063694	1.2441		By MS/MS	By matching	By matching	255.11	57040	72558	75902	170200	213410	195150	19892	29120	7724.9	778.5	54884	70023	80728
Q14204	Q14204	6	6	6	Cytoplasmic dynein 1 heavy chain 1	DYNC1H1	sp|Q14204|DYHC1_HUMAN Cytoplasmic dynein 1 heavy chain 1 OS=Homo sapiens GN=DYNC1H1 PE=1 SV=5	1	6	6	6	1	6	2	5	1	6	2	5	1	6	2	5	1.2	1.2	1.2	532.4	4646	4646	0	8.0352	By matching	By MS/MS	By matching	By MS/MS	529.96	64986	84602	89225	63973	76851	74537	59063	97320	70800	888.17	61302	79779	90053
Q14257	Q14257	1	1	1	Reticulocalbin-2	RCN2	sp|Q14257|RCN2_HUMAN Reticulocalbin-2 OS=Homo sapiens GN=RCN2 PE=1 SV=1	1	1	1	1	1	1	1	1	1	1	1	1	1	1	1	1	2.5	2.5	2.5	36.876	317	317	0.0096618	1.0716	By MS/MS	By MS/MS	By matching	By MS/MS	171.43	17605	17221	20285	15995	19427	15804	16437	24043	20705	273.93	16582	16285	20726
Q14498	Q14498	4	4	4	RNA-binding protein 39	RBM39	sp|Q14498|RBM39_HUMAN RNA-binding protein 39 OS=Homo sapiens GN=RBM39 PE=1 SV=2	1	4	4	4	1	3	0	4	1	3	0	4	1	3	0	4	8.3	8.3	8.3	59.379	530	530	0	13.23	By matching	By MS/MS		By MS/MS	122.14	54809	54496	59868	54456	59656	55732	40831	77766	58880	195.2	51606	51559	61434
Q14574	Q14574	2	2	2	Desmocollin-3	DSC3	sp|Q14574|DSC3_HUMAN Desmocollin-3 OS=Homo sapiens GN=DSC3 PE=1 SV=3	1	2	2	2	0	1	0	2	0	1	0	2	0	1	0	2	2.7	2.7	2.7	99.968	896	896	0	5.6365		By MS/MS		By MS/MS	0	21827	19945	24879	10291	11540	9526.3	7638.1	13653	10181	0	20464	18732	25105
Q14697	Q14697	1	1	1	Neutral alpha-glucosidase AB	GANAB	sp|Q14697|GANAB_HUMAN Neutral alpha-glucosidase AB OS=Homo sapiens GN=GANAB PE=1 SV=3	1	1	1	1	0	1	0	1	0	1	0	1	0	1	0	1	1.8	1.8	1.8	106.87	944	944	0	11.212		By matching		By MS/MS	0	10744	11443	12823	9845.1	12166	10069	9382.9	19598	15129	0	10123	10803	13071
Q14739	Q14739	3	3	3	Lamin-B receptor	LBR	sp|Q14739|LBR_HUMAN Lamin-B receptor OS=Homo sapiens GN=LBR PE=1 SV=2	1	3	3	3	2	3	2	3	2	3	2	3	2	3	2	3	6.2	6.2	6.2	70.702	615	615	0	5.8886	By matching	By MS/MS	By matching	By matching	369.11	44004	41635	41879	40854	49640	48582	31686	49584	29619	582.2	41422	39400	43588
Q14766	Q14766	2	2	2	Latent-transforming growth factor beta-binding protein 1	LTBP1	sp|Q14766|LTBP1_HUMAN Latent-transforming growth factor beta-binding protein 1 OS=Homo sapiens GN=LTBP1 PE=1 SV=4	1	2	2	2	2	1	1	0	2	1	1	0	2	1	1	0	1.3	1.3	1.3	186.79	1721	1721	0	5.4905	By MS/MS	By matching	By MS/MS		0	13810	8904	10438	14741	12843	16508	13152	9625.1	18375	0	12969	8504.7	11077
Q14974	Q14974	13	13	13	Importin subunit beta-1	KPNB1	sp|Q14974|IMB1_HUMAN Importin subunit beta-1 OS=Homo sapiens GN=KPNB1 PE=1 SV=2	1	13	13	13	11	13	12	12	11	13	12	12	11	13	12	12	18.2	18.2	18.2	97.169	876	876	0	96.346	By MS/MS	By MS/MS	By MS/MS	By MS/MS	1426.7	317020	286340	315320	379710	336070	346030	263930	390120	376900	2344.9	298310	272270	326160
Q15008	Q15008	1	1	1	26S proteasome non-ATPase regulatory subunit 6	PSMD6	sp|Q15008|PSMD6_HUMAN 26S proteasome non-ATPase regulatory subunit 6 OS=Homo sapiens GN=PSMD6 PE=1 SV=1	1	1	1	1	0	1	0	1	0	1	0	1	0	1	0	1	2.3	2.3	2.3	45.531	389	389	0.0027435	1.6536		By MS/MS		By matching	0	2887.1	2852.2	3040.7	2682.5	3109.1	2465.6	2517.2	3330.1	2146.5	0	2717.7	2695.8	3129.7
Q15029	Q15029	10	9	9	116 kDa U5 small nuclear ribonucleoprotein component	EFTUD2	sp|Q15029|U5S1_HUMAN 116 kDa U5 small nuclear ribonucleoprotein component OS=Homo sapiens GN=EFTUD2 PE=1 SV=1	1	10	9	9	3	8	1	8	2	7	1	8	2	7	1	8	12.9	11.8	11.8	109.43	972	972	0	23.927	By matching	By MS/MS	By matching	By MS/MS	365.73	112290	112980	124160	77479	86691	84330	63958	106450	78053	762.73	105470	106400	126310
Q15041	Q15041	1	1	1	ADP-ribosylation factor-like protein 6-interacting protein 1	ARL6IP1	sp|Q15041|AR6P1_HUMAN ADP-ribosylation factor-like protein 6-interacting protein 1 OS=Homo sapiens GN=ARL6IP1 PE=1 SV=2	1	1	1	1	1	1	1	0	1	1	1	0	1	1	1	0	4.9	4.9	4.9	23.362	203	203	0	1.9011	By MS/MS	By MS/MS	By MS/MS		663.47	23953	20266	24552	38652	27374	27262	19629	12174	27964	652.78	22556	19474	25377
Q15181	Q15181	1	1	1	Inorganic pyrophosphatase	PPA1	sp|Q15181|IPYR_HUMAN Inorganic pyrophosphatase OS=Homo sapiens GN=PPA1 PE=1 SV=2	1	1	1	1	1	1	0	1	1	1	0	1	1	1	0	1	3.1	3.1	3.1	32.66	289	289	0.0051813	1.3096	By matching	By MS/MS		By matching	96.862	10360	8970.4	9590	5891	7290.8	7295	6041.8	7493.4	5048.7	157.07	9718.4	8449.3	9891.3
Q15185	Q15185	1	1	1	Prostaglandin E synthase 3	PTGES3	sp|Q15185|TEBP_HUMAN Prostaglandin E synthase 3 OS=Homo sapiens GN=PTGES3 PE=1 SV=1	1	1	1	1	1	1	1	1	1	1	1	1	1	1	1	1	6.2	6.2	6.2	18.697	160	160	0.0013889	1.7107	By MS/MS	By matching	By matching	By MS/MS	503.12	46241	22533	28771	20626	21848	24639	17967	20840	24754	636.45	43245	21323	30745
Q15208	Q15208	28	28	23	Serine/threonine-protein kinase 38	STK38	sp|Q15208|STK38_HUMAN Serine/threonine-protein kinase 38 OS=Homo sapiens GN=STK38 PE=1 SV=1	1	28	28	23	23	28	26	25	23	28	26	25	18	23	21	20	55.1	55.1	48	54.19	465	465	0	142.69	By MS/MS	By MS/MS	By MS/MS	By MS/MS	3398.4	1491400	1607700	1894200	1898500	1847600	1940700	1421400	1772200	1942600	8054.1	1406900	1525100	1925500
Q15233	Q15233	20	20	17	Non-POU domain-containing octamer-binding protein	NONO	sp|Q15233|NONO_HUMAN Non-POU domain-containing octamer-binding protein OS=Homo sapiens GN=NONO PE=1 SV=4	1	20	20	17	18	19	16	15	18	19	16	15	15	16	13	12	35.7	35.7	31	54.231	471	471	0	42.143	By MS/MS	By MS/MS	By MS/MS	By MS/MS	1792.4	550820	479340	550200	524610	534120	525620	438440	459550	586940	3353.8	517950	454200	567530
Q15287	Q15287	7	7	7	RNA-binding protein with serine-rich domain 1	RNPS1	sp|Q15287|RNPS1_HUMAN RNA-binding protein with serine-rich domain 1 OS=Homo sapiens GN=RNPS1 PE=1 SV=1	1	7	7	7	0	7	1	7	0	7	1	7	0	7	1	7	27.9	27.9	27.9	34.208	305	305	0	45.539		By MS/MS	By matching	By MS/MS	366.16	109740	103700	114550	77646	85238	80631	83761	119270	94941	556.16	103050	97758	117110
Q15293	Q15293	2	2	2	Reticulocalbin-1	RCN1	sp|Q15293|RCN1_HUMAN Reticulocalbin-1 OS=Homo sapiens GN=RCN1 PE=1 SV=1	1	2	2	2	1	1	1	2	1	1	1	2	1	1	1	2	4.5	4.5	4.5	38.89	331	331	0	1.874	By matching	By matching	By MS/MS	By MS/MS	251.91	22337	20196	22306	24805	21527	23220	15189	23267	27488	385.13	21003	19187	23005
Q15363	Q15363	6	6	6	Transmembrane emp24 domain-containing protein 2	TMED2	sp|Q15363|TMED2_HUMAN Transmembrane emp24 domain-containing protein 2 OS=Homo sapiens GN=TMED2 PE=1 SV=1	1	6	6	6	4	3	3	6	4	3	3	6	4	3	3	6	28.4	28.4	28.4	22.761	201	201	0	9.2179	By matching	By MS/MS	By matching	By MS/MS	343.08	44700	43249	45650	52864	64676	44671	45535	63395	49877	499.38	42195	41071	47567
Q15365	Q15365	3	2	2	Poly(rC)-binding protein 1	PCBP1	sp|Q15365|PCBP1_HUMAN Poly(rC)-binding protein 1 OS=Homo sapiens GN=PCBP1 PE=1 SV=2	1	3	2	2	3	3	2	3	2	2	2	2	2	2	2	2	12.6	7	7	37.497	356	356	0	6.3553	By MS/MS	By MS/MS	By matching	By MS/MS	0	37713	28787	37883	27652	34407	31702	27973	50938	36281	0	35447	27216	38997
Q15366;P57721	Q15366	5;2	5;2	4;1	Poly(rC)-binding protein 2	PCBP2	sp|Q15366|PCBP2_HUMAN Poly(rC)-binding protein 2 OS=Homo sapiens GN=PCBP2 PE=1 SV=1	2	5	5	4	3	4	0	3	3	4	0	3	2	3	0	2	21.6	21.6	16.2	38.58	365	365;371	0	21.806	By MS/MS	By MS/MS		By MS/MS	228.14	44911	34440	39932	33520	35886	34629	28521	46314	39977	285.6	42155	32582	41461
Q15369	Q15369	1	1	1	Transcription elongation factor B polypeptide 1	TCEB1	sp|Q15369|ELOC_HUMAN Elongin-C OS=Homo sapiens GN=ELOC PE=1 SV=1	1	1	1	1	1	1	0	1	1	1	0	1	1	1	0	1	8.9	8.9	8.9	12.473	112	112	0	2.0894	By MS/MS	By matching		By matching	169.6	13963	6456.9	12065	17238	10763	13175	11771	7422.7	12911	206.06	13102	6270.7	12552
Q15370	Q15370	2	2	2	Transcription elongation factor B polypeptide 2	TCEB2	sp|Q15370|ELOB_HUMAN Elongin-B OS=Homo sapiens GN=ELOB PE=1 SV=1	1	2	2	2	2	2	1	2	2	2	1	2	2	2	1	2	15.3	15.3	15.3	13.133	118	118	0	3.1787	By MS/MS	By MS/MS	By matching	By matching	55.627	26054	21228	27015	22863	27696	25877	24040	21432	26130	160.76	24521	20108	27836
Q15393	Q15393	31	31	31	Splicing factor 3B subunit 3	SF3B3	sp|Q15393|SF3B3_HUMAN Splicing factor 3B subunit 3 OS=Homo sapiens GN=SF3B3 PE=1 SV=4	1	31	31	31	8	28	6	30	8	28	6	30	8	28	6	30	32.3	32.3	32.3	135.58	1217	1217	0	231.06	By matching	By MS/MS	By matching	By MS/MS	1703.5	696580	657180	671680	574260	642890	647630	445390	729400	539790	3704.8	654680	620630	694300
Q15427	Q15427	5	5	5	Splicing factor 3B subunit 4	SF3B4	sp|Q15427|SF3B4_HUMAN Splicing factor 3B subunit 4 OS=Homo sapiens GN=SF3B4 PE=1 SV=1	1	5	5	5	0	4	0	5	0	4	0	5	0	4	0	5	14.2	14.2	14.2	44.385	424	424	0	12.974		By MS/MS		By MS/MS	200.58	51352	49988	55042	48309	74599	60351	40738	64761	50119	389.11	48486	47278	57083
Q15717	Q15717	2	2	2	ELAV-like protein 1	ELAVL1	sp|Q15717|ELAV1_HUMAN ELAV-like protein 1 OS=Homo sapiens GN=ELAVL1 PE=1 SV=2	1	2	2	2	0	1	0	2	0	1	0	2	0	1	0	2	6.1	6.1	6.1	36.091	326	326	0	5.3306		By MS/MS		By MS/MS	105.29	29365	26852	30438	19792	22461	22462	17140	31622	24809	162.44	27572	25309	31127
Q15738	Q15738	1	1	1	Sterol-4-alpha-carboxylate 3-dehydrogenase, decarboxylating	NSDHL	sp|Q15738|NSDHL_HUMAN Sterol-4-alpha-carboxylate 3-dehydrogenase, decarboxylating OS=Homo sapiens GN=NSDHL PE=1 SV=2	1	1	1	1	0	1	0	0	0	1	0	0	0	1	0	0	2.4	2.4	2.4	41.9	373	373	0	2.3946		By MS/MS			0	0	0	0	0	0	0	0	0	0	0	0	0	0
Q15750	Q15750	19	19	19	TGF-beta-activated kinase 1 and MAP3K7-binding protein 1	TAB1	sp|Q15750|TAB1_HUMAN TGF-beta-activated kinase 1 and MAP3K7-binding protein 1 OS=Homo sapiens GN=TAB1 PE=1 SV=1	1	19	19	19	11	18	7	18	11	18	7	18	11	18	7	18	50.6	50.6	50.6	54.643	504	504	0	213.51	By MS/MS	By MS/MS	By MS/MS	By MS/MS	2332.6	475110	418460	429500	315710	352750	341630	274420	431070	344420	3701.3	445790	394570	444480
Q15758	Q15758	4	4	4	Neutral amino acid transporter B(0)	SLC1A5	sp|Q15758|AAAT_HUMAN Neutral amino acid transporter B(0) OS=Homo sapiens GN=SLC1A5 PE=1 SV=2	1	4	4	4	2	4	2	3	2	4	2	3	2	4	2	3	9.6	9.6	9.6	56.598	541	541	0	19.665	By matching	By MS/MS	By MS/MS	By MS/MS	0	64843	61953	67037	60284	77068	64057	61489	94101	72293	0	61088	58583	69313
Q15773	Q15773	1	1	1	Myeloid leukemia factor 2	MLF2	sp|Q15773|MLF2_HUMAN Myeloid leukemia factor 2 OS=Homo sapiens GN=MLF2 PE=1 SV=1	1	1	1	1	1	0	1	1	1	0	1	1	1	0	1	1	4.8	4.8	4.8	28.147	248	248	0	2.1364	By MS/MS		By matching	By matching	0	8218.5	4309.7	7988	6147.1	7945.7	8283.8	5948.3	4777.7	8289.8	0	7727	4102.6	8260.5
Q16514	Q16514	2	2	2	Transcription initiation factor TFIID subunit 12	TAF12	sp|Q16514|TAF12_HUMAN Transcription initiation factor TFIID subunit 12 OS=Homo sapiens GN=TAF12 PE=1 SV=1	1	2	2	2	0	2	1	2	0	2	1	2	0	2	1	2	11.2	11.2	11.2	17.924	161	161	0	3.2084		By MS/MS	By matching	By MS/MS	0	18355	14506	17156	13775	16351	17664	13077	19941	16511	0	17245	13712	17772
Q16531	Q16531	14	14	14	DNA damage-binding protein 1	DDB1	sp|Q16531|DDB1_HUMAN DNA damage-binding protein 1 OS=Homo sapiens GN=DDB1 PE=1 SV=1	1	14	14	14	9	12	8	11	9	12	8	11	9	12	8	11	11.6	11.6	11.6	126.97	1140	1140	0	22.475	By MS/MS	By MS/MS	By MS/MS	By MS/MS	1941.4	298430	256810	303300	274910	289830	281020	225120	296600	317480	3175.5	280640	243320	312360
Q16629	Q16629	12	12	11	Serine/arginine-rich splicing factor 7	SRSF7	sp|Q16629|SRSF7_HUMAN Serine/arginine-rich splicing factor 7 OS=Homo sapiens GN=SRSF7 PE=1 SV=1	1	12	12	11	3	12	4	12	3	12	4	12	3	11	4	11	40.3	40.3	40.3	27.366	238	238	0	78.65	By MS/MS	By MS/MS	By matching	By MS/MS	696.74	453310	431730	427630	286950	341000	342670	338300	478290	344490	2470.8	425430	406400	440880
Q16630	Q16630	2	2	2	Cleavage and polyadenylation specificity factor subunit 6	CPSF6	sp|Q16630|CPSF6_HUMAN Cleavage and polyadenylation specificity factor subunit 6 OS=Homo sapiens GN=CPSF6 PE=1 SV=2	1	2	2	2	1	2	0	1	1	2	0	1	1	2	0	1	6.2	6.2	6.2	59.209	551	551	0	21.586	By matching	By MS/MS		By MS/MS	0	11742	8771.7	8907.8	7620.9	8915.9	8304	8854.6	15032	14106	0	11012	8281.7	9395.2
Q16637	Q16637	1	1	1	Survival motor neuron protein	SMN1	sp|Q16637|SMN_HUMAN Survival motor neuron protein OS=Homo sapiens GN=SMN1 PE=1 SV=1	1	1	1	1	1	1	0	1	1	1	0	1	1	1	0	1	3.1	3.1	3.1	31.848	294	294	0.0040214	1.5106	By MS/MS	By MS/MS		By MS/MS	0	0	0	0	0	0	0	0	0	0	0	0	0	0
Q16659;P31152;P28482;P27361	Q16659;P31152	6;3;1;1	6;3;1;1	6;3;1;1	Mitogen-activated protein kinase 6;Mitogen-activated protein kinase 4	MAPK6;MAPK4	sp|Q16659|MK06_HUMAN Mitogen-activated protein kinase 6 OS=Homo sapiens GN=MAPK6 PE=1 SV=1;sp|P31152|MK04_HUMAN Mitogen-activated protein kinase 4 OS=Homo sapiens GN=MAPK4 PE=1 SV=2	4	6	6	6	0	6	2	5	0	6	2	5	0	6	2	5	8.6	8.6	8.6	82.68	721	721;587;360;379	0	10.222		By MS/MS	By matching	By MS/MS	0	73959	79013	101830	72339	103950	73502	72406	106970	89124	0	69890	74651	103200
Q16718	Q16718	2	2	2	NADH dehydrogenase [ubiquinone] 1 alpha subcomplex subunit 5	NDUFA5	sp|Q16718|NDUA5_HUMAN NADH dehydrogenase [ubiquinone] 1 alpha subcomplex subunit 5 OS=Homo sapiens GN=NDUFA5 PE=1 SV=3	1	2	2	2	1	2	2	2	1	2	2	2	1	2	2	2	22.4	22.4	22.4	13.459	116	116	0	12.412	By matching	By MS/MS	By MS/MS	By MS/MS	0	23423	28000	31756	23658	27062	30628	22509	30919	33081	0	22089	26426	32064
Q16769	Q16769	2	2	2	Glutaminyl-peptide cyclotransferase	QPCT	sp|Q16769|QPCT_HUMAN Glutaminyl-peptide cyclotransferase OS=Homo sapiens GN=QPCT PE=1 SV=1	1	2	2	2	1	2	1	1	1	2	1	1	1	2	1	1	6.9	6.9	6.9	40.876	361	361	0	5.1684	By MS/MS	By MS/MS	By MS/MS	By MS/MS	463.7	52751	58933	70492	68010	64131	64986	49105	67833	65750	705.34	49767	55908	71338
Q16875;Q16877;P16118	Q16875	24;4;4	24;4;4	20;2;2	6-phosphofructo-2-kinase/fructose-2,6-bisphosphatase 3;6-phosphofructo-2-kinase;Fructose-2,6-bisphosphatase	PFKFB3	sp|Q16875|F263_HUMAN 6-phosphofructo-2-kinase/fructose-2,6-bisphosphatase 3 OS=Homo sapiens GN=PFKFB3 PE=1 SV=1	3	24	24	20	12	24	16	22	12	24	16	22	11	20	14	18	49	49	42.1	59.608	520	520;469;471	0	181.98	By MS/MS	By MS/MS	By MS/MS	By MS/MS	3093.2	717640	699540	742650	590320	677990	656560	470540	779470	581100	5804.4	674780	660430	763060
Q16878	Q16878	1	1	1	Cysteine dioxygenase type 1	CDO1	sp|Q16878|CDO1_HUMAN Cysteine dioxygenase type 1 OS=Homo sapiens GN=CDO1 PE=1 SV=2	1	1	1	1	1	1	0	1	1	1	0	1	1	1	0	1	3.5	3.5	3.5	22.972	200	200	0.0052288	1.3567	By matching	By MS/MS		By MS/MS	73.302	39225	31604	33960	25320	30014	30369	20485	35690	25632	236.89	36805	29813	35320
Q16891	Q16891	14	14	14	MICOS complex subunit MIC60	IMMT	sp|Q16891|MIC60_HUMAN MICOS complex subunit MIC60 OS=Homo sapiens GN=IMMT PE=1 SV=1	1	14	14	14	9	12	8	13	9	12	8	13	9	12	8	13	23.4	23.4	23.4	83.677	758	758	0	40.815	By MS/MS	By MS/MS	By MS/MS	By MS/MS	581.92	222020	211890	226550	224940	232880	219970	169510	229920	229450	1149.9	208920	200670	233700
Q3V6T2	Q3V6T2	25	25	25	Girdin	CCDC88A	sp|Q3V6T2|GRDN_HUMAN Girdin OS=Homo sapiens GN=CCDC88A PE=1 SV=2	1	25	25	25	3	25	6	23	3	25	6	23	3	25	6	23	13.5	13.5	13.5	216.04	1871	1871	0	87.285	By matching	By MS/MS	By matching	By MS/MS	1797.7	395680	438260	470220	384810	448990	413240	338100	562820	426160	3217.2	372840	413960	479530
Q494V2	Q494V2	1	1	1	Coiled-coil domain-containing protein 37	CCDC37	sp|Q494V2|CP100_HUMAN Cilia- and flagella-associated protein 100 OS=Homo sapiens GN=CFAP100 PE=2 SV=1	1	1	1	1	0	0	0	1	0	0	0	1	0	0	0	1	1.1	1.1	1.1	71.116	611	611	0.009697	1.091				By MS/MS	143.02	14552	18456	23074	729.35	901.02	2009.1	1232.7	1415.2	1486.3	270.78	13617	17221	22617
Q53GQ0	Q53GQ0	2	2	2	Very-long-chain 3-oxoacyl-CoA reductase	HSD17B12	sp|Q53GQ0|DHB12_HUMAN Very-long-chain 3-oxoacyl-CoA reductase OS=Homo sapiens GN=HSD17B12 PE=1 SV=2	1	2	2	2	2	1	2	2	2	1	2	2	2	1	2	2	7.1	7.1	7.1	34.324	312	312	0	7.8205	By matching	By MS/MS	By matching	By MS/MS	57.277	24725	20052	21885	18730	23715	18756	17893	30099	24179	167.39	23237	18954	22840
Q53H12	Q53H12	2	2	2	Acylglycerol kinase, mitochondrial	AGK	sp|Q53H12|AGK_HUMAN Acylglycerol kinase, mitochondrial OS=Homo sapiens GN=AGK PE=1 SV=2	1	2	2	2	1	1	1	2	1	1	1	2	1	1	1	2	5	5	5	47.137	422	422	0	3.4587	By matching	By matching	By MS/MS	By MS/MS	0	12798	11885	12113	16183	11450	15309	11459	14942	16354	0	12025	11303	12534
Q5BJF2	Q5BJF2	2	2	2	Transmembrane protein 97	TMEM97	sp|Q5BJF2|TMM97_HUMAN Transmembrane protein 97 OS=Homo sapiens GN=TMEM97 PE=1 SV=1	1	2	2	2	0	1	0	2	0	1	0	2	0	1	0	2	10.2	10.2	10.2	20.848	176	176	0	2.2789		By matching		By MS/MS	0	19337	17349	17834	13250	12533	11886	10975	20110	17267	0	18131	16354	18372
Q5BKZ1	Q5BKZ1	1	1	1	DBIRD complex subunit ZNF326	ZNF326	sp|Q5BKZ1|ZN326_HUMAN DBIRD complex subunit ZNF326 OS=Homo sapiens GN=ZNF326 PE=1 SV=2	1	1	1	1	0	1	0	1	0	1	0	1	0	1	0	1	2.7	2.7	2.7	65.653	582	582	0	7.5833		By MS/MS		By MS/MS	0	9041.1	9389.5	10326	8031.1	8360.7	8311.2	5942.7	10333	7820.5	0	8503.4	8863.2	10515
Q5SWX8	Q5SWX8	14	14	14	Protein odr-4 homolog	ODR4	sp|Q5SWX8|ODR4_HUMAN Protein odr-4 homolog OS=Homo sapiens GN=ODR4 PE=1 SV=1	1	14	14	14	7	11	8	13	7	11	8	13	7	11	8	13	37.2	37.2	37.2	51.103	454	454	0	61.254	By MS/MS	By MS/MS	By MS/MS	By MS/MS	882.71	299680	282380	331390	300630	311900	290500	234950	313770	313520	1675.6	282080	267440	339300
Q5UIP0	Q5UIP0	1	1	1	Telomere-associated protein RIF1	RIF1	sp|Q5UIP0|RIF1_HUMAN Telomere-associated protein RIF1 OS=Homo sapiens GN=RIF1 PE=1 SV=2	1	1	1	1	1	0	1	0	1	0	1	0	1	0	1	0	0.6	0.6	0.6	274.46	2472	2472	0	2.1614	By MS/MS		By matching		129.11	9145.8	4447.6	6265.6	5427.9	7351.6	6165.8	6403.3	3467.6	9094.8	153.38	8578	4230	6700.2
Q5VT06	Q5VT06	32	32	32	Centrosome-associated protein 350	CEP350	sp|Q5VT06|CE350_HUMAN Centrosome-associated protein 350 OS=Homo sapiens GN=CEP350 PE=1 SV=1	1	32	32	32	8	26	8	29	8	26	8	29	8	26	8	29	11.6	11.6	11.6	350.93	3117	3117	0	123.15	By matching	By MS/MS	By MS/MS	By MS/MS	1855.4	538530	607410	605930	481760	606120	519840	402760	640410	474440	4074.7	507270	572950	620690
Q5VTL8	Q5VTL8	5	5	5	Pre-mRNA-splicing factor 38B	PRPF38B	sp|Q5VTL8|PR38B_HUMAN Pre-mRNA-splicing factor 38B OS=Homo sapiens GN=PRPF38B PE=1 SV=1	1	5	5	5	0	5	0	4	0	5	0	4	0	5	0	4	7.5	7.5	7.5	64.467	546	546	0	7.6248		By MS/MS		By MS/MS	265.79	88335	97127	112130	89282	105950	101230	90619	150030	104650	430.52	83304	91788	113890
Q5VWN6	Q5VWN6	3	3	3	Protein FAM208B	FAM208B	sp|Q5VWN6|F208B_HUMAN Protein FAM208B OS=Homo sapiens GN=FAM208B PE=1 SV=1	1	3	3	3	0	3	0	0	0	3	0	0	0	3	0	0	1.3	1.3	1.3	268.84	2430	2430	0	6.033		By MS/MS			0	6185.5	6079.4	5824.5	3674.5	4979.4	4248.7	3829.2	6038.6	3230.5	0	5807.5	5717.3	6014.8
Q5VYK3	Q5VYK3	1	1	1	Proteasome-associated protein ECM29 homolog	ECM29	sp|Q5VYK3|ECM29_HUMAN Proteasome-associated protein ECM29 homolog OS=Homo sapiens GN=ECM29 PE=1 SV=2	1	1	1	1	0	1	0	1	0	1	0	1	0	1	0	1	0.8	0.8	0.8	204.29	1845	1845	0.0075472	1.1908		By matching		By MS/MS	0	3644.8	3304.7	3304	2363.4	2322.3	2252.1	1611.5	3326.9	2796.1	0	3417.1	3112.9	3408
Q5W0B1	Q5W0B1	38	38	38	RING finger protein 219	RNF219	sp|Q5W0B1|RN219_HUMAN RING finger protein 219 OS=Homo sapiens GN=RNF219 PE=1 SV=1	1	38	38	38	34	33	35	35	34	33	35	35	34	33	35	35	48.2	48.2	48.2	81.116	726	726	0	282.55	By MS/MS	By MS/MS	By MS/MS	By MS/MS	6174.3	2106000	2206300	2502400	2159400	2153000	2254500	1738500	2102600	2536000	15735	1982600	2086800	2545600
Q5XUX0	Q5XUX0	1	1	1	F-box only protein 31	FBXO31	sp|Q5XUX0|FBX31_HUMAN F-box only protein 31 OS=Homo sapiens GN=FBXO31 PE=1 SV=2	1	1	1	1	0	1	0	1	0	1	0	1	0	1	0	1	3	3	3	60.663	539	539	0	2.6044		By matching		By MS/MS	0	896.17	379.57	617.55	706.53	843.83	426.12	451.98	869.86	483.48	0	841.47	363.64	663.24
Q6N021	Q6N021	18	18	18	Methylcytosine dioxygenase TET2	TET2	sp|Q6N021|TET2_HUMAN Methylcytosine dioxygenase TET2 OS=Homo sapiens GN=TET2 PE=1 SV=3	1	18	18	18	18	13	16	12	18	13	16	12	18	13	16	12	9.8	9.8	9.8	223.81	2002	2002	0	60.635	By MS/MS	By MS/MS	By MS/MS	By MS/MS	1748	304590	235530	275910	365770	295350	302640	232730	239560	345110	2302.1	286310	224750	287350
Q6NUK1	Q6NUK1	1	1	1	Calcium-binding mitochondrial carrier protein SCaMC-1	SLC25A24	sp|Q6NUK1|SCMC1_HUMAN Calcium-binding mitochondrial carrier protein SCaMC-1 OS=Homo sapiens GN=SLC25A24 PE=1 SV=2	1	1	1	1	0	1	0	1	0	1	0	1	0	1	0	1	1.7	1.7	1.7	53.354	477	477	0.0073892	1.1476		By matching		By MS/MS	0	12496	7525.3	7953.5	7290.5	8379.4	7871.9	5642.3	9804.2	9108.2	0	11705	7115.5	8542
Q6P1Q9	Q6P1Q9	1	1	1	Methyltransferase-like protein 2B	METTL2B	sp|Q6P1Q9|MET2B_HUMAN Methyltransferase-like protein 2B OS=Homo sapiens GN=METTL2B PE=1 SV=3	1	1	1	1	1	1	0	0	1	1	0	0	1	1	0	0	2.9	2.9	2.9	43.426	378	378	0.0076239	1.2189	By MS/MS	By MS/MS			0	0	0	0	0	0	0	0	0	0	0	0	0	0
Q6P2Q9	Q6P2Q9	9	9	9	Pre-mRNA-processing-splicing factor 8	PRPF8	sp|Q6P2Q9|PRP8_HUMAN Pre-mRNA-processing-splicing factor 8 OS=Homo sapiens GN=PRPF8 PE=1 SV=2	1	9	9	9	1	7	0	9	1	7	0	9	1	7	0	9	3.6	3.6	3.6	273.6	2335	2335	0	15.601	By matching	By MS/MS		By MS/MS	328.34	83737	69078	75873	59997	70633	65698	56942	85726	60468	497.61	78632	65241	78731
Q6P3W7	Q6P3W7	14	14	14	SCY1-like protein 2	SCYL2	sp|Q6P3W7|SCYL2_HUMAN SCY1-like protein 2 OS=Homo sapiens GN=SCYL2 PE=1 SV=1	1	14	14	14	7	13	5	13	7	13	5	13	7	13	5	13	16.3	16.3	16.3	103.71	929	929	0	46.804	By MS/MS	By MS/MS	By matching	By MS/MS	833.75	273160	260700	281960	236320	267790	252450	191850	323290	249920	1791.4	256920	246330	290040
Q6PKG0;Q659C4	Q6PKG0	17;1	17;1	17;1	La-related protein 1	LARP1	sp|Q6PKG0|LARP1_HUMAN La-related protein 1 OS=Homo sapiens GN=LARP1 PE=1 SV=2	2	17	17	17	3	17	1	16	3	17	1	16	3	17	1	16	19.1	19.1	19.1	123.51	1096	1096;914	0	90.125	By matching	By MS/MS	By matching	By MS/MS	1077.5	344150	361540	391780	266590	316020	300140	242120	407560	310550	2364.7	323660	340750	398990
Q6QNY1	Q6QNY1	2	2	2	Biogenesis of lysosome-related organelles complex 1 subunit 2	BLOC1S2	sp|Q6QNY1|BL1S2_HUMAN Biogenesis of lysosome-related organelles complex 1 subunit 2 OS=Homo sapiens GN=BLOC1S2 PE=1 SV=1	1	2	2	2	0	2	1	2	0	2	1	2	0	2	1	2	13.4	13.4	13.4	15.961	142	142	0	3.6416		By MS/MS	By matching	By MS/MS	73.773	56281	48400	52459	43984	50344	47484	33783	60282	43445	249.21	52877	45728	54361
Q6UB35	Q6UB35	2	2	2	Monofunctional C1-tetrahydrofolate synthase, mitochondrial	MTHFD1L	sp|Q6UB35|C1TM_HUMAN Monofunctional C1-tetrahydrofolate synthase, mitochondrial OS=Homo sapiens GN=MTHFD1L PE=1 SV=1	1	2	2	2	1	2	1	2	1	2	1	2	1	2	1	2	2.4	2.4	2.4	105.79	978	978	0	4.5348	By matching	By MS/MS	By matching	By MS/MS	0	14008	14584	16640	13547	17048	16567	11431	18157	11994	0	13208	13781	17001
Q6UWP8	Q6UWP8	1	1	1	Suprabasin	SBSN	sp|Q6UWP8|SBSN_HUMAN Suprabasin OS=Homo sapiens GN=SBSN PE=1 SV=2	1	1	1	1	1	1	0	1	1	1	0	1	1	1	0	1	9.2	9.2	9.2	60.54	590	590	0	1.7622	By matching	By MS/MS		By matching	0	373.09	312.39	612.94	571.61	612.99	580.72	518.14	595.83	370.87	0	353.59	299.14	615.74
Q6VN20	Q6VN20	7	7	6	Ran-binding protein 10	RANBP10	sp|Q6VN20|RBP10_HUMAN Ran-binding protein 10 OS=Homo sapiens GN=RANBP10 PE=1 SV=1	1	7	7	6	3	5	2	7	3	5	2	7	3	4	2	6	14.4	14.4	11.6	67.256	620	620	0	57.247	By matching	By MS/MS	By matching	By MS/MS	371.28	98905	91901	97762	78589	87696	82684	64722	106000	94163	610.65	92938	86775	100720
Q70IA6	Q70IA6	7	7	6	MOB kinase activator 2	MOB2	sp|Q70IA6|MOB2_HUMAN MOB kinase activator 2 OS=Homo sapiens GN=MOB2 PE=1 SV=1	1	7	7	6	0	6	1	6	0	6	1	6	0	6	1	6	22.4	22.4	19.4	26.926	237	237	0	13.093		By MS/MS	By matching	By MS/MS	262.62	215390	215190	226130	161490	183000	173390	137140	230540	175740	811.79	202390	202830	231490
Q71U36;Q13748;Q6PEY2	Q71U36;Q13748;Q6PEY2	21;17;12	1;1;1	1;1;1	Tubulin alpha-1A chain;Tubulin alpha-3C/D chain;Tubulin alpha-3E chain	TUBA1A;TUBA3C;TUBA3E	sp|Q71U36|TBA1A_HUMAN Tubulin alpha-1A chain OS=Homo sapiens GN=TUBA1A PE=1 SV=1;sp|Q13748|TBA3C_HUMAN Tubulin alpha-3C/D chain OS=Homo sapiens GN=TUBA3C PE=1 SV=3;sp|Q6PEY2|TBA3E_HUMAN Tubulin alpha-3E chain OS=Homo sapiens GN=TUBA3E PE=1 SV=2	3	21	1	1	19	20	16	21	0	1	1	1	0	1	1	1	56.5	3.1	3.1	50.135	451	451;450;450	0	3.7564	By matching	By MS/MS	By matching	By MS/MS	0	7378.3	5991.2	5900.6	4805.5	4803.5	4831.8	4532	7197.3	5442.6	0	6915	5650.9	6165.4
Q7L2E3	Q7L2E3	2	2	2	Putative ATP-dependent RNA helicase DHX30	DHX30	sp|Q7L2E3|DHX30_HUMAN Putative ATP-dependent RNA helicase DHX30 OS=Homo sapiens GN=DHX30 PE=1 SV=1	1	2	2	2	0	2	0	2	0	2	0	2	0	2	0	2	1.4	1.4	1.4	133.94	1194	1194	0	2.3042		By MS/MS		By MS/MS	106.92	29091	30409	32861	22509	26503	26610	18748	32990	26687	191.62	27357	28663	33482
Q7L2H7	Q7L2H7	1	1	1	Eukaryotic translation initiation factor 3 subunit M	EIF3M	sp|Q7L2H7|EIF3M_HUMAN Eukaryotic translation initiation factor 3 subunit M OS=Homo sapiens GN=EIF3M PE=1 SV=1	1	1	1	1	0	1	0	1	0	1	0	1	0	1	0	1	4.8	4.8	4.8	42.502	374	374	0	13.041		By MS/MS		By matching	0	1887.9	2251.1	1475.5	1880.3	2034	1942.3	1583.4	3193	1844.3	0	1775.2	2124.3	1567.2
Q7L5Y9	Q7L5Y9	1	1	1	Macrophage erythroblast attacher	MAEA	sp|Q7L5Y9|MAEA_HUMAN Macrophage erythroblast attacher OS=Homo sapiens GN=MAEA PE=1 SV=1	1	1	1	1	0	1	0	1	0	1	0	1	0	1	0	1	5.3	5.3	5.3	45.287	396	396	0	10.671		By MS/MS		By MS/MS	0	5963.2	6827.2	6780.4	5013.3	6420.4	6029.8	4340.6	8629.5	5853.5	0	5615.2	6433	6931.4
Q9H8S9;Q7L9L4	Q9H8S9;Q7L9L4	2;2	2;2	2;2	MOB kinase activator 1A;MOB kinase activator 1B	MOB1A;MOB1B	sp|Q9H8S9|MOB1A_HUMAN MOB kinase activator 1A OS=Homo sapiens GN=MOB1A PE=1 SV=4;sp|Q7L9L4|MOB1B_HUMAN MOB kinase activator 1B OS=Homo sapiens GN=MOB1B PE=1 SV=3	2	2	2	2	0	2	0	1	0	2	0	1	0	2	0	1	10.6	10.6	10.6	25.079	216	216;216	0	4.9187		By MS/MS		By MS/MS	172.9	12178	10930	13528	10621	12529	10985	8671.6	14878	10137	197.74	11461	10347	13842
Q7RTV0	Q7RTV0	7	7	7	PHD finger-like domain-containing protein 5A	PHF5A	sp|Q7RTV0|PHF5A_HUMAN PHD finger-like domain-containing protein 5A OS=Homo sapiens GN=PHF5A PE=1 SV=1	1	7	7	7	4	6	4	6	4	6	4	6	4	6	4	6	48.2	48.2	48.2	12.405	110	110	0	35.914	By matching	By MS/MS	By matching	By MS/MS	487.73	159400	137390	150210	137310	161500	146220	103740	177670	133900	929.52	149910	130000	156000
Q7Z353	Q7Z353	9	9	9	Highly divergent homeobox	HDX	sp|Q7Z353|HDX_HUMAN Highly divergent homeobox OS=Homo sapiens GN=HDX PE=1 SV=1	1	9	9	9	8	5	8	5	8	5	8	5	8	5	8	5	14.8	14.8	14.8	77.205	690	690	0	44.279	By MS/MS	By matching	By MS/MS	By matching	123.58	107950	68369	82167	119090	110870	113840	91692	74463	135050	141.31	101460	65394	87410
Q7Z406	Q7Z406	8	1	1	Myosin-14	MYH14	sp|Q7Z406|MYH14_HUMAN Myosin-14 OS=Homo sapiens GN=MYH14 PE=1 SV=2	1	8	1	1	7	7	7	7	1	1	1	1	1	1	1	1	3.8	0.6	0.6	227.87	1995	1995	0	2.7748	By MS/MS	By MS/MS	By MS/MS	By matching	274.32	43758	40587	51036	60112	64440	60269	55065	53093	66209	413.96	41338	38686	52528
Q7Z5H3	Q7Z5H3	2	2	2	Rho GTPase-activating protein 22	ARHGAP22	sp|Q7Z5H3|RHG22_HUMAN Rho GTPase-activating protein 22 OS=Homo sapiens GN=ARHGAP22 PE=1 SV=1	1	2	2	2	0	2	0	1	0	2	0	1	0	2	0	1	3.9	3.9	3.9	76.778	698	698	0	3.2369		By MS/MS		By MS/MS	0	6933.2	8705.4	7979.3	9986.8	12126	10683	9160.4	12699	9323.9	0	6563.7	8253	8274.4
Q9BYJ9;Q9Y5A9;Q7Z739	Q9BYJ9;Q9Y5A9;Q7Z739	1;1;1	1;1;1	1;1;1	YTH domain-containing family protein 1;YTH domain-containing family protein 2;YTH domain-containing family protein 3	YTHDF1;YTHDF2;YTHDF3	sp|Q9BYJ9|YTHD1_HUMAN YTH domain-containing family protein 1 OS=Homo sapiens GN=YTHDF1 PE=1 SV=1;sp|Q9Y5A9|YTHD2_HUMAN YTH domain-containing family protein 2 OS=Homo sapiens GN=YTHDF2 PE=1 SV=2;sp|Q7Z739|YTHD3_HUMAN YTH domain-containing family protein 3 O	3	1	1	1	0	0	1	1	0	0	1	1	0	0	1	1	1.6	1.6	1.6	60.873	559	559;579;585	0	2.2288			By MS/MS	By matching	0	2547	2356.7	3511.7	5871.6	5008.4	4773.5	4964.4	3570.1	4596	0	2417.5	2278.6	3597.1
Q7Z7H5	Q7Z7H5	2	1	1	Transmembrane emp24 domain-containing protein 4	TMED4	sp|Q7Z7H5|TMED4_HUMAN Transmembrane emp24 domain-containing protein 4 OS=Homo sapiens GN=TMED4 PE=1 SV=1	1	2	1	1	1	1	1	1	1	1	1	0	1	1	1	0	11.5	4	4	25.943	227	227	0.0051282	1.2762	By MS/MS	By matching	By MS/MS	By matching	0	9209.5	5349.6	6834	10794	7546.3	7766.3	7624.2	5053.4	10152	0	8640.8	5136.8	7241.1
Q86U42	Q86U42	2	2	2	Polyadenylate-binding protein 2	PABPN1	sp|Q86U42|PABP2_HUMAN Polyadenylate-binding protein 2 OS=Homo sapiens GN=PABPN1 PE=1 SV=3	1	2	2	2	0	2	0	1	0	2	0	1	0	2	0	1	8.8	8.8	8.8	32.749	306	306	0	50.072		By MS/MS		By MS/MS	150.85	51419	46507	50656	22240	23899	24658	22184	39988	28532	286.56	48155	43665	51620
Q86VP6	Q86VP6	6	6	6	Cullin-associated NEDD8-dissociated protein 1	CAND1	sp|Q86VP6|CAND1_HUMAN Cullin-associated NEDD8-dissociated protein 1 OS=Homo sapiens GN=CAND1 PE=1 SV=2	1	6	6	6	3	6	4	5	3	6	4	5	3	6	4	5	5.1	5.1	5.1	136.37	1230	1230	0	19.294	By MS/MS	By MS/MS	By matching	By MS/MS	217.88	83961	63133	76849	62548	83360	68795	60369	76866	82368	532.53	78939	59725	80002
Q86VV8	Q86VV8	1	1	1	Rotatin	RTTN	sp|Q86VV8|RTTN_HUMAN Rotatin OS=Homo sapiens GN=RTTN PE=1 SV=3	1	1	1	1	0	1	0	1	0	1	0	1	0	1	0	1	0.3	0.3	0.3	248.63	2226	2226	0.0075	1.1743		By MS/MS		By MS/MS	156.74	33034	22677	24707	16516	20352	18698	15947	28469	22071	270.34	30945	21376	25973
Q86XN7	Q86XN7	2	2	2	Proline and serine-rich protein 1	PROSER1	sp|Q86XN7|PRSR1_HUMAN Proline and serine-rich protein 1 OS=Homo sapiens GN=PROSER1 PE=1 SV=2	1	2	2	2	0	0	2	0	0	0	2	0	0	0	2	0	3.4	3.4	3.4	95.697	944	944	0	11.154			By MS/MS		0	19740	17693	15690	37825	19822	28844	16199	19189	28438	0	18552	17019	16593
Q8IUR7	Q8IUR7	1	1	1	Armadillo repeat-containing protein 8	ARMC8	sp|Q8IUR7|ARMC8_HUMAN Armadillo repeat-containing protein 8 OS=Homo sapiens GN=ARMC8 PE=1 SV=2	1	1	1	1	0	1	0	1	0	1	0	1	0	1	0	1	1.3	1.3	1.3	75.509	673	673	0.0051948	1.33		By MS/MS		By matching	103.92	8844.4	8601.5	8217.1	5700.1	7640.2	6835.9	5309.4	7250.9	4639.1	160.89	8307.4	8103.3	8510.6
Q8IWI9	Q8IWI9	8	8	8	MAX gene-associated protein	MGA	sp|Q8IWI9|MGAP_HUMAN MAX gene-associated protein OS=Homo sapiens GN=MGA PE=1 SV=3	1	8	8	8	4	7	4	7	4	7	4	7	4	7	4	7	2.7	2.7	2.7	331.83	3026	3026	0	36.719	By matching	By MS/MS	By matching	By MS/MS	469.73	163320	182980	181430	173500	221860	169610	160480	234920	143440	1500.5	154120	173000	187080
Q8IWX8	Q8IWX8	13	13	13	Calcium homeostasis endoplasmic reticulum protein	CHERP	sp|Q8IWX8|CHERP_HUMAN Calcium homeostasis endoplasmic reticulum protein OS=Homo sapiens GN=CHERP PE=1 SV=3	1	13	13	13	2	12	3	13	2	12	3	13	2	12	3	13	16.2	16.2	16.2	103.7	916	916	0	49.268	By matching	By MS/MS	By matching	By MS/MS	867.33	236360	236500	253000	228060	257230	250430	173010	302910	229020	1412.4	222530	223660	260080
Q8IX12	Q8IX12	8	8	8	Cell division cycle and apoptosis regulator protein 1	CCAR1	sp|Q8IX12|CCAR1_HUMAN Cell division cycle and apoptosis regulator protein 1 OS=Homo sapiens GN=CCAR1 PE=1 SV=2	1	8	8	8	4	8	4	8	4	8	4	8	4	8	4	8	5.7	5.7	5.7	132.82	1150	1150	0	10.316	By matching	By MS/MS	By matching	By MS/MS	453.23	118430	112960	117190	86923	106860	97370	87034	132700	96076	1043.1	111300	106530	120780
Q8IXB1	Q8IXB1	3	3	3	DnaJ homolog subfamily C member 10	DNAJC10	sp|Q8IXB1|DJC10_HUMAN DnaJ homolog subfamily C member 10 OS=Homo sapiens GN=DNAJC10 PE=1 SV=2	1	3	3	3	1	2	0	3	1	2	0	3	1	2	0	3	3.3	3.3	3.3	91.079	793	793	0	2.8543	By matching	By MS/MS		By MS/MS	434.3	40167	35655	38856	25096	27826	26198	19682	36793	30111	561.29	37682	33611	39903
Q8IYB3	Q8IYB3	5	5	5	Serine/arginine repetitive matrix protein 1	SRRM1	sp|Q8IYB3|SRRM1_HUMAN Serine/arginine repetitive matrix protein 1 OS=Homo sapiens GN=SRRM1 PE=1 SV=2	1	5	5	5	2	5	1	5	2	5	1	5	2	5	1	5	8.4	8.4	8.4	102.33	904	904	0	17.576	By matching	By MS/MS	By matching	By MS/MS	0	108800	92522	100570	65607	79376	79593	66155	102910	79649	0	102080	87147	103820
Q8N1I0;Q8IZD9	Q8N1I0	48;4	48;4	48;4	Dedicator of cytokinesis protein 4	DOCK4	sp|Q8N1I0|DOCK4_HUMAN Dedicator of cytokinesis protein 4 OS=Homo sapiens GN=DOCK4 PE=1 SV=3	2	48	48	48	33	38	33	45	33	38	33	45	33	38	33	45	27.9	27.9	27.9	225.2	1966	1966;2030	0	193.19	By MS/MS	By MS/MS	By MS/MS	By MS/MS	2992.1	830300	781380	889120	863000	879860	807570	693750	1001500	896870	5423.3	781540	740510	913360
Q8N5C8	Q8N5C8	1	1	1	TGF-beta-activated kinase 1 and MAP3K7-binding protein 3	TAB3	sp|Q8N5C8|TAB3_HUMAN TGF-beta-activated kinase 1 and MAP3K7-binding protein 3 OS=Homo sapiens GN=TAB3 PE=1 SV=2	1	1	1	1	1	0	1	0	1	0	1	0	1	0	1	0	1.4	1.4	1.4	78.682	712	712	0.0075949	1.199	By MS/MS		By matching		0	1803.2	1090.8	1882.5	2010.3	2613.5	2150.8	2402.2	1267.4	3326.7	0	1702.3	1044.7	1957.3
Q8N5K1	Q8N5K1	4	4	4	CDGSH iron-sulfur domain-containing protein 2	CISD2	sp|Q8N5K1|CISD2_HUMAN CDGSH iron-sulfur domain-containing protein 2 OS=Homo sapiens GN=CISD2 PE=1 SV=1	1	4	4	4	1	4	0	4	1	4	0	4	1	4	0	4	31.1	31.1	31.1	15.278	135	135	0	7.9108	By matching	By MS/MS		By MS/MS	8.2828	37643	40264	42403	38246	46180	43525	34902	50909	32350	161.35	35487	38061	43535
Q8N726	Q8N726	1	1	1	Tumor suppressor ARF	CDKN2A	sp|Q8N726|ARF_HUMAN Tumor suppressor ARF OS=Homo sapiens GN=CDKN2A PE=1 SV=2	1	1	1	1	1	0	0	1	1	0	0	1	1	0	0	1	14.4	14.4	14.4	13.903	132	132	0.0076336	1.2263	By matching			By MS/MS	0	736.51	451.01	631.41	460.12	422.71	355.43	360.73	583.23	447.62	0	690	426.77	653.53
Q8N766	Q8N766	1	1	1	ER membrane protein complex subunit 1	EMC1	sp|Q8N766|EMC1_HUMAN ER membrane protein complex subunit 1 OS=Homo sapiens GN=EMC1 PE=1 SV=1	1	1	1	1	0	1	0	1	0	1	0	1	0	1	0	1	1.8	1.8	1.8	111.76	993	993	0.008589	1.1335		By MS/MS		By matching	142.19	5846.3	6882.5	7042.1	7533.7	8285.2	8198.3	6261.7	9437.7	5123.3	183.71	5521.4	6529.5	7218
Q8N8S7	Q8N8S7	1	1	1	Protein enabled homolog	ENAH	sp|Q8N8S7|ENAH_HUMAN Protein enabled homolog OS=Homo sapiens GN=ENAH PE=1 SV=2	1	1	1	1	1	1	1	0	1	1	1	0	1	1	1	0	1.9	1.9	1.9	66.509	591	591	0.002736	1.6384	By MS/MS	By matching	By matching		0	1996.2	918.38	2272.6	1418.9	2403.9	2809.1	1539.6	1172.9	2013.8	0	1881.6	875.77	2329.8
Q8NC51	Q8NC51	2	2	2	Plasminogen activator inhibitor 1 RNA-binding protein	SERBP1	sp|Q8NC51|PAIRB_HUMAN Plasminogen activator inhibitor 1 RNA-binding protein OS=Homo sapiens GN=SERBP1 PE=1 SV=2	1	2	2	2	2	1	2	1	2	1	2	1	2	1	2	1	7.1	7.1	7.1	44.965	408	408	0	13.989	By MS/MS	By MS/MS	By MS/MS	By matching	14.561	79647	46663	58888	45991	46219	66196	41023	38131	47529	133.77	74586	44133	61909
Q8ND56	Q8ND56	8	8	8	Protein LSM14 homolog A	LSM14A	sp|Q8ND56|LS14A_HUMAN Protein LSM14 homolog A OS=Homo sapiens GN=LSM14A PE=1 SV=3	1	8	8	8	5	8	5	8	5	8	5	8	5	8	5	8	18.1	18.1	18.1	50.529	463	463	0	31.353	By MS/MS	By MS/MS	By MS/MS	By MS/MS	593.93	216850	181410	195070	193390	194110	191770	143720	217140	192510	1015.9	203710	171820	202870
Q8NEY8	Q8NEY8	6	6	6	Periphilin-1	PPHLN1	sp|Q8NEY8|PPHLN_HUMAN Periphilin-1 OS=Homo sapiens GN=PPHLN1 PE=1 SV=2	1	6	6	6	2	6	1	6	2	6	1	6	2	6	1	6	12.2	12.2	12.2	52.736	458	458	0	10.364	By matching	By MS/MS	By matching	By MS/MS	464.52	93358	90082	95568	67781	80456	66371	55523	89044	60597	679.52	87720	84935	98083
Q8NFC6	Q8NFC6	1	1	1	Biorientation of chromosomes in cell division protein 1-like 1	BOD1L1	sp|Q8NFC6|BD1L1_HUMAN Biorientation of chromosomes in cell division protein 1-like 1 OS=Homo sapiens GN=BOD1L1 PE=1 SV=2	1	1	1	1	1	0	1	1	1	0	1	1	1	0	1	1	0.5	0.5	0.5	330.46	3051	3051	0.0075567	1.1923	By matching		By MS/MS	By matching	0	5327.7	3468.1	2175.8	133390	6438.5	16632	2214.2	2297.9	6112.1	0	5007.5	5100.3	2583.6
Q8NFU7	Q8NFU7	1	1	1	Methylcytosine dioxygenase TET1	TET1	sp|Q8NFU7|TET1_HUMAN Methylcytosine dioxygenase TET1 OS=Homo sapiens GN=TET1 PE=1 SV=2	1	1	1	1	1	1	1	1	1	1	1	1	1	1	1	1	0.4	0.4	0.4	235.31	2136	2136	0	2.3625	By MS/MS	By MS/MS	By MS/MS	By MS/MS	0	49754	42731	47357	36180	36933	36111	30923	34408	39723	168.41	46692	40330	48771
Q8NHQ1	Q8NHQ1	6	6	6	Centrosomal protein of 70 kDa	CEP70	sp|Q8NHQ1|CEP70_HUMAN Centrosomal protein of 70 kDa OS=Homo sapiens GN=CEP70 PE=1 SV=2	1	6	6	6	3	6	5	6	3	6	5	6	3	6	5	6	9.7	9.7	9.7	69.751	597	597	0	9.5838	By MS/MS	By MS/MS	By MS/MS	By MS/MS	295.15	113800	111360	123750	123540	124890	122740	94479	115080	125180	416.16	107150	105530	127070
Q8TDY2	Q8TDY2	5	5	5	RB1-inducible coiled-coil protein 1	RB1CC1	sp|Q8TDY2|RBCC1_HUMAN RB1-inducible coiled-coil protein 1 OS=Homo sapiens GN=RB1CC1 PE=1 SV=3	1	5	5	5	1	3	1	5	1	3	1	5	1	3	1	5	3.7	3.7	3.7	183.09	1594	1594	0	26.781	By matching	By matching	By matching	By MS/MS	247.73	72234	71471	78163	47306	52507	52312	39358	75160	61997	425.88	67815	67289	79569
Q8TEX9	Q8TEX9	3	3	3	Importin-4	IPO4	sp|Q8TEX9|IPO4_HUMAN Importin-4 OS=Homo sapiens GN=IPO4 PE=1 SV=2	1	3	3	3	1	2	0	3	1	2	0	3	1	2	0	3	5.2	5.2	5.2	118.71	1081	1081	0	30.188	By matching	By MS/MS		By MS/MS	123.55	8474.6	7474.5	8131.7	6730.2	7191.2	7314.1	6154.2	10802	8408.1	138.23	7960	7068.8	8392.5
Q8WUH6	Q8WUH6	2	2	2	Transmembrane protein 263	TMEM263	sp|Q8WUH6|TM263_HUMAN Transmembrane protein 263 OS=Homo sapiens GN=TMEM263 PE=1 SV=1	1	2	2	2	2	0	1	1	2	0	1	1	2	0	1	1	21.6	21.6	21.6	11.748	116	116	0	15.595	By MS/MS		By MS/MS	By matching	303.86	60916	59010	66968	72774	122600	82968	65179	47645	97272	625.36	57777	56035	70200
Q8WWY3	Q8WWY3	13	13	13	U4/U6 small nuclear ribonucleoprotein Prp31	PRPF31	sp|Q8WWY3|PRP31_HUMAN U4/U6 small nuclear ribonucleoprotein Prp31 OS=Homo sapiens GN=PRPF31 PE=1 SV=2	1	13	13	13	2	13	3	12	2	13	3	12	2	13	3	12	33.1	33.1	33.1	55.455	499	499	0	69.591	By matching	By MS/MS	By matching	By MS/MS	1679.1	349720	392620	391630	376790	430660	417960	328110	547670	404580	3330.3	329690	371300	402340
Q8WXF1;REV__Q8IVF4	Q8WXF1	18;1	16;1	16;1	Paraspeckle component 1	PSPC1	sp|Q8WXF1|PSPC1_HUMAN Paraspeckle component 1 OS=Homo sapiens GN=PSPC1 PE=1 SV=1	2	18	16	16	14	11	15	10	12	9	13	8	12	9	13	8	29.8	28.5	28.5	58.743	523	523;4471	0	99.832	By MS/MS	By MS/MS	By MS/MS	By MS/MS	2549	512070	454500	542190	484400	451560	469430	364900	405270	536720	4628.4	481290	430540	555080
Q8WXR4	Q8WXR4	2	2	2	Myosin-IIIb	MYO3B	sp|Q8WXR4|MYO3B_HUMAN Myosin-IIIb OS=Homo sapiens GN=MYO3B PE=2 SV=4	1	2	2	2	0	1	1	1	0	1	1	1	0	1	1	1	1.8	1.8	1.8	151.83	1341	1341	0.0074813	1.1705		By MS/MS	By MS/MS	By matching	0	18384	11834	12515	42413	17270	19132	10668	13763	19006	0	17261	11623	13461
Q92499	Q92499	2	2	2	ATP-dependent RNA helicase DDX1	DDX1	sp|Q92499|DDX1_HUMAN ATP-dependent RNA helicase DDX1 OS=Homo sapiens GN=DDX1 PE=1 SV=2	1	2	2	2	1	1	0	1	1	1	0	1	1	1	0	1	2.4	2.4	2.4	82.431	740	740	0	5.6625	By matching	By MS/MS		By MS/MS	14.37	13773	17160	18195	17948	23899	18249	13757	21615	12919	141.32	13046	16245	18623
Q92552	Q92552	2	2	2	28S ribosomal protein S27, mitochondrial	MRPS27	sp|Q92552|RT27_HUMAN 28S ribosomal protein S27, mitochondrial OS=Homo sapiens GN=MRPS27 PE=1 SV=3	1	2	2	2	1	2	1	1	1	2	1	1	1	2	1	1	6.8	6.8	6.8	47.611	414	414	0	3.0664	By MS/MS	By MS/MS	By MS/MS	By MS/MS	188.55	33188	85305	206130	89545	146950	198500	93972	120150	136180	589.46	32709	80768	198950
Q92600	Q92600	2	2	2	Cell differentiation protein RCD1 homolog	RQCD1	sp|Q92600|CNOT9_HUMAN CCR4-NOT transcription complex subunit 9 OS=Homo sapiens GN=CNOT9 PE=1 SV=1	1	2	2	2	1	1	0	0	1	1	0	0	1	1	0	0	7.7	7.7	7.7	33.631	299	299	0	4.3473	By MS/MS	By MS/MS			0	5458	6481.7	5658.1	2240.1	2819.4	3127.9	2401.7	3468	2158.5	0	5114.6	6072.1	5749.6
Q92616	Q92616	6	6	6	Translational activator GCN1	GCN1L1	sp|Q92616|GCN1_HUMAN eIF-2-alpha kinase activator GCN1 OS=Homo sapiens GN=GCN1 PE=1 SV=6	1	6	6	6	2	3	2	5	2	3	2	5	2	3	2	5	3.8	3.8	3.8	292.75	2671	2671	0	34.25	By MS/MS	By MS/MS	By MS/MS	By MS/MS	0	27303	25506	30287	33338	27729	28460	23880	38288	36302	0	25695	24237	30983
Q92841;P17844	Q92841	15;5	15;5	15;5	Probable ATP-dependent RNA helicase DDX17	DDX17	sp|Q92841|DDX17_HUMAN Probable ATP-dependent RNA helicase DDX17 OS=Homo sapiens GN=DDX17 PE=1 SV=2	2	15	15	15	7	14	9	15	7	14	9	15	7	14	9	15	22.9	22.9	22.9	80.272	729	729;614	0	65.763	By matching	By MS/MS	By matching	By MS/MS	840.67	365870	338310	363970	317950	364640	376880	253720	427140	311050	1739.2	344100	319810	375840
Q92900	Q92900	1	1	1	Regulator of nonsense transcripts 1	UPF1	sp|Q92900|RENT1_HUMAN Regulator of nonsense transcripts 1 OS=Homo sapiens GN=UPF1 PE=1 SV=2	1	1	1	1	0	0	0	1	0	0	0	1	0	0	0	1	1.4	1.4	1.4	124.34	1129	1129	0.0075853	1.1983				By MS/MS	0	3824	2426.8	3202	2435.4	2133.9	2232.9	1925.4	3521.8	2780.2	0	3581.8	2295.8	3320.2
Q92945;Q96I24	Q92945	10;1	10;1	9;0	Far upstream element-binding protein 2	KHSRP	sp|Q92945|FUBP2_HUMAN Far upstream element-binding protein 2 OS=Homo sapiens GN=KHSRP PE=1 SV=4	2	10	10	9	6	8	6	6	6	8	6	6	6	7	5	5	15.3	15.3	14.1	73.114	711	711;572	0	26.308	By MS/MS	By MS/MS	By MS/MS	By MS/MS	860.04	200980	131210	160510	147890	165680	169690	135600	133920	173510	1301.2	188620	124420	168680
Q92973;O14787	Q92973;O14787	4;2	4;2	4;2	Transportin-1;Transportin-2	TNPO1;TNPO2	sp|Q92973|TNPO1_HUMAN Transportin-1 OS=Homo sapiens GN=TNPO1 PE=1 SV=2;sp|O14787|TNPO2_HUMAN Transportin-2 OS=Homo sapiens GN=TNPO2 PE=1 SV=3	2	4	4	4	2	3	3	4	2	3	3	4	2	3	3	4	4.5	4.5	4.5	102.35	898	898;897	0	10.542	By MS/MS	By MS/MS	By MS/MS	By MS/MS	103.3	52973	48942	52798	58392	51634	49559	39012	65020	64387	165.82	49814	46437	54479
Q93100	Q93100	27	27	27	Phosphorylase b kinase regulatory subunit beta	PHKB	sp|Q93100|KPBB_HUMAN Phosphorylase b kinase regulatory subunit beta OS=Homo sapiens GN=PHKB PE=1 SV=3	1	27	27	27	22	25	23	23	22	25	23	23	22	25	23	23	25.3	25.3	25.3	124.88	1093	1093	0	114.57	By MS/MS	By MS/MS	By MS/MS	By MS/MS	3061.8	1036800	1019000	1106500	935150	868540	891870	675870	848620	954420	7567.5	974210	962960	1130800
Q96A33	Q96A33	1	1	1	Coiled-coil domain-containing protein 47	CCDC47	sp|Q96A33|CCD47_HUMAN Coiled-coil domain-containing protein 47 OS=Homo sapiens GN=CCDC47 PE=1 SV=1	1	1	1	1	1	0	0	1	1	0	0	1	1	0	0	1	2.5	2.5	2.5	55.873	483	483	0	2.0251	By matching			By MS/MS	0	11554	11144	12519	10443	12488	11103	8730.3	16440	14664	0	10877	10532	12853
Q96A72;P61326	Q96A72;P61326	2;1	2;1	2;1	Protein mago nashi homolog 2;Protein mago nashi homolog	MAGOHB;MAGOH	sp|Q96A72|MGN2_HUMAN Protein mago nashi homolog 2 OS=Homo sapiens GN=MAGOHB PE=1 SV=1;sp|P61326|MGN_HUMAN Protein mago nashi homolog OS=Homo sapiens GN=MAGOH PE=1 SV=1	2	2	2	2	0	2	0	0	0	2	0	0	0	2	0	0	11.5	11.5	11.5	17.276	148	148;146	0	2.7497		By MS/MS			0	8302.6	9631.2	9651.9	6143.2	8536.3	8041.2	6928.7	9342.6	7418.5	0	7815.8	9062	9837.4
Q96AE4	Q96AE4	2	1	1	Far upstream element-binding protein 1	FUBP1	sp|Q96AE4|FUBP1_HUMAN Far upstream element-binding protein 1 OS=Homo sapiens GN=FUBP1 PE=1 SV=3	1	2	1	1	1	2	1	2	1	1	0	1	1	1	0	1	3.4	2	2	67.56	644	644	0	1.8837	By MS/MS	By matching	By matching	By matching	0	11647	6029.2	9201.7	6368.7	7654.6	8480.5	7928.7	4447.8	10347	0	10916	5708.2	9629.1
Q96AG4	Q96AG4	6	6	6	Leucine-rich repeat-containing protein 59	LRRC59	sp|Q96AG4|LRC59_HUMAN Leucine-rich repeat-containing protein 59 OS=Homo sapiens GN=LRRC59 PE=1 SV=1	1	6	6	6	4	4	4	5	4	4	4	5	4	4	4	5	22.8	22.8	22.8	34.93	307	307	0	43.888	By MS/MS	By MS/MS	By MS/MS	By MS/MS	399.14	87724	75587	81453	155990	107540	99209	77455	92892	113200	580.69	82633	72657	85225
Q96AV8	Q96AV8	5	5	5	Transcription factor E2F7	E2F7	sp|Q96AV8|E2F7_HUMAN Transcription factor E2F7 OS=Homo sapiens GN=E2F7 PE=1 SV=3	1	5	5	5	3	5	2	4	3	5	2	4	3	5	2	4	5.6	5.6	5.6	99.887	911	911	0	14.276	By matching	By MS/MS	By matching	By MS/MS	305.45	80346	90584	99086	74084	88761	86722	59999	98085	71093	730	75702	85480	100680
Q96B26	Q96B26	2	2	2	Exosome complex component RRP43	EXOSC8	sp|Q96B26|EXOS8_HUMAN Exosome complex component RRP43 OS=Homo sapiens GN=EXOSC8 PE=1 SV=1	1	2	2	2	0	2	0	1	0	2	0	1	0	2	0	1	16.7	16.7	16.7	30.039	276	276	0	9.5561		By MS/MS		By matching	0	6759	8225.8	8719.3	7621.4	8576.2	8530.5	7080.9	9614	6649.2	0	6378.1	7772.9	8857.9
Q96CS3	Q96CS3	1	1	1	FAS-associated factor 2	FAF2	sp|Q96CS3|FAF2_HUMAN FAS-associated factor 2 OS=Homo sapiens GN=FAF2 PE=1 SV=2	1	1	1	1	1	1	0	1	1	1	0	1	1	1	0	1	1.6	1.6	1.6	52.623	445	445	0.0076046	1.2054	By MS/MS	By MS/MS		By MS/MS	0	20371	14200	17938	14727	17948	15085	15034	17852	20993	0	19133	13440	18688
Q96DG6	Q96DG6	5	5	5	Carboxymethylenebutenolidase homolog	CMBL	sp|Q96DG6|CMBL_HUMAN Carboxymethylenebutenolidase homolog OS=Homo sapiens GN=CMBL PE=1 SV=1	1	5	5	5	3	5	3	5	3	5	3	5	3	5	3	5	18.4	18.4	18.4	28.048	245	245	0	9.9195	By MS/MS	By MS/MS	By MS/MS	By MS/MS	698.86	138450	118580	127230	112470	110600	111880	88669	126500	132560	1461.3	129970	112140	131670
Q96DI7	Q96DI7	2	2	2	U5 small nuclear ribonucleoprotein 40 kDa protein	SNRNP40	sp|Q96DI7|SNR40_HUMAN U5 small nuclear ribonucleoprotein 40 kDa protein OS=Homo sapiens GN=SNRNP40 PE=1 SV=1	1	2	2	2	1	2	0	2	1	2	0	2	1	2	0	2	6.4	6.4	6.4	39.31	357	357	0	4.1172	By matching	By MS/MS		By MS/MS	142.47	58077	58950	67883	42923	49650	47388	37133	61904	47511	341.3	54598	55550	68885
Q96EY1	Q96EY1	1	1	1	DnaJ homolog subfamily A member 3, mitochondrial	DNAJA3	sp|Q96EY1|DNJA3_HUMAN DnaJ homolog subfamily A member 3, mitochondrial OS=Homo sapiens GN=DNAJA3 PE=1 SV=2	1	1	1	1	0	0	0	1	0	0	0	1	0	0	0	1	2.5	2.5	2.5	52.488	480	480	0	2.0062				By MS/MS	0	12894	11361	13859	10073	10668	9741.5	8250.3	15924	13801	0	12115	10730	14151
Q96EY7	Q96EY7	1	1	1	Pentatricopeptide repeat domain-containing protein 3, mitochondrial	PTCD3	sp|Q96EY7|PTCD3_HUMAN Pentatricopeptide repeat domain-containing protein 3, mitochondrial OS=Homo sapiens GN=PTCD3 PE=1 SV=3	1	1	1	1	0	1	0	1	0	1	0	1	0	1	0	1	1.9	1.9	1.9	78.549	689	689	0.0051414	1.2798		By MS/MS		By matching	0	860.75	810.55	951.52	1121.2	1401	1113.6	1031.5	1218	927.02	0	813.95	771.11	987.89
Q96HS1	Q96HS1	7	7	7	Serine/threonine-protein phosphatase PGAM5, mitochondrial	PGAM5	sp|Q96HS1|PGAM5_HUMAN Serine/threonine-protein phosphatase PGAM5, mitochondrial OS=Homo sapiens GN=PGAM5 PE=1 SV=2	1	7	7	7	3	7	0	4	3	7	0	4	3	7	0	4	20.8	20.8	20.8	32.004	289	289	0	12.544	By matching	By MS/MS		By matching	642.13	118510	114990	124720	62905	74717	74289	51640	70742	44854	1131.4	111160	108090	126950
Q96I25	Q96I25	10	10	10	Splicing factor 45	RBM17	sp|Q96I25|SPF45_HUMAN Splicing factor 45 OS=Homo sapiens GN=RBM17 PE=1 SV=1	1	10	10	10	2	8	2	10	2	8	2	10	2	8	2	10	28.2	28.2	28.2	44.961	401	401	0	31.357	By matching	By MS/MS	By matching	By MS/MS	676.65	126590	134100	148050	130400	149100	139010	99501	167440	124220	1177.7	119310	126850	151330
Q96IX5	Q96IX5	1	1	1	Up-regulated during skeletal muscle growth protein 5	USMG5	sp|Q96IX5|USMG5_HUMAN Up-regulated during skeletal muscle growth protein 5 OS=Homo sapiens GN=USMG5 PE=1 SV=1	1	1	1	1	0	1	0	1	0	1	0	1	0	1	0	1	25.9	25.9	25.9	6.4575	58	58	0	2.7254		By MS/MS		By matching	0	6516.3	8856.5	8219.3	7627.2	10715	9860.8	7106	10946	6841.3	0	6166.6	8360.8	8431.2
Q96J01	Q96J01	1	1	1	THO complex subunit 3	THOC3	sp|Q96J01|THOC3_HUMAN THO complex subunit 3 OS=Homo sapiens GN=THOC3 PE=1 SV=1	1	1	1	1	1	1	1	1	1	1	1	1	1	1	1	1	2.6	2.6	2.6	38.771	351	351	0	2.0087	By MS/MS	By MS/MS	By matching	By MS/MS	228.08	34396	25399	24656	31237	32799	26089	25987	31279	27601	314.26	32303	24124	26358
Q96JJ3	Q96JJ3	19	19	14	Engulfment and cell motility protein 2	ELMO2	sp|Q96JJ3|ELMO2_HUMAN Engulfment and cell motility protein 2 OS=Homo sapiens GN=ELMO2 PE=1 SV=2	1	19	19	14	11	16	14	19	11	16	14	19	8	12	11	14	27.9	27.9	22.8	82.614	720	720	0	77.449	By MS/MS	By MS/MS	By MS/MS	By MS/MS	1141.1	489050	435920	501880	551490	495540	484770	409780	510700	562180	2173.1	460070	414060	516970
Q96MT8	Q96MT8	1	1	1	Centrosomal protein of 63 kDa	CEP63	sp|Q96MT8|CEP63_HUMAN Centrosomal protein of 63 kDa OS=Homo sapiens GN=CEP63 PE=1 SV=1	1	1	1	1	1	0	1	1	1	0	1	1	1	0	1	1	1.7	1.7	1.7	81.343	703	703	0.0075377	1.1828	By MS/MS		By MS/MS	By matching	0	26056	21283	23367	872540	124620	46438	47556	18796	102260	0	25231	32056	27043
Q96MU7	Q96MU7	1	1	1	YTH domain-containing protein 1	YTHDC1	sp|Q96MU7|YTDC1_HUMAN YTH domain-containing protein 1 OS=Homo sapiens GN=YTHDC1 PE=1 SV=3	1	1	1	1	0	1	0	1	0	1	0	1	0	1	0	1	1.7	1.7	1.7	84.699	727	727	0	2.7311		By MS/MS		By matching	0	4687.7	4984.6	6870.7	5332.5	6693	5269.9	4502.4	6804.6	4166.3	0	4432.1	4720.2	6933
Q96P70	Q96P70	5	5	4	Importin-9	IPO9	sp|Q96P70|IPO9_HUMAN Importin-9 OS=Homo sapiens GN=IPO9 PE=1 SV=3	1	5	5	4	3	4	1	5	3	4	1	5	3	4	1	4	6	6	3.9	115.96	1041	1041	0	16.6	By matching	By MS/MS	By matching	By MS/MS	245.66	45224	45070	46284	40219	46276	42369	35955	62159	45223	320.86	42548	42584	47700
Q96S52	Q96S52	1	1	1	GPI transamidase component PIG-S	PIGS	sp|Q96S52|PIGS_HUMAN GPI transamidase component PIG-S OS=Homo sapiens GN=PIGS PE=1 SV=3	1	1	1	1	0	1	0	0	0	1	0	0	0	1	0	0	3.8	3.8	3.8	61.655	555	555	0	6.3941		By MS/MS			0	1439.8	1866.8	1867.9	1737.1	2294.3	2010.8	1496.3	2082.1	1557.8	0	1362.2	1764.1	1909.4
Q96S59	Q96S59	7	6	6	Ran-binding protein 9	RANBP9	sp|Q96S59|RANB9_HUMAN Ran-binding protein 9 OS=Homo sapiens GN=RANBP9 PE=1 SV=1	1	7	6	6	2	7	3	7	2	6	3	6	2	6	3	6	13.2	10.8	10.8	77.846	729	729	0	16	By matching	By MS/MS	By MS/MS	By MS/MS	96.883	84232	83729	92597	81809	75413	77441	57683	97685	76253	182.08	79191	79185	94525
Q96T76	Q96T76	2	2	2	MMS19 nucleotide excision repair protein homolog	MMS19	sp|Q96T76|MMS19_HUMAN MMS19 nucleotide excision repair protein homolog OS=Homo sapiens GN=MMS19 PE=1 SV=2	1	2	2	2	0	1	1	0	0	1	1	0	0	1	1	0	3.3	3.3	3.3	113.29	1030	1030	0	5.5087		By MS/MS	By MS/MS		107.56	9755.4	7975.4	8445.1	26195	11165	15099	7497	9329.5	14361	159.61	9181.1	7807.1	8883.1
Q99417	Q99417	9	9	9	C-Myc-binding protein	MYCBP	sp|Q99417|MYCBP_HUMAN C-Myc-binding protein OS=Homo sapiens GN=MYCBP PE=1 SV=3	1	9	9	9	9	8	8	8	9	8	8	8	9	8	8	8	73.8	73.8	73.8	11.967	103	103	0	63.582	By MS/MS	By MS/MS	By MS/MS	By MS/MS	3230.9	725680	992870	1256100	929700	1070600	1160700	917340	910220	1361400	8062.2	687100	938560	1254100
Q99460	Q99460	22	22	22	26S proteasome non-ATPase regulatory subunit 1	PSMD1	sp|Q99460|PSMD1_HUMAN 26S proteasome non-ATPase regulatory subunit 1 OS=Homo sapiens GN=PSMD1 PE=1 SV=2	1	22	22	22	15	20	10	20	15	20	10	20	15	20	10	20	27.5	27.5	27.5	105.84	953	953	0	57.383	By MS/MS	By MS/MS	By MS/MS	By MS/MS	2423.3	464390	498130	531290	461600	533400	513550	402020	632450	511550	4538.5	437550	470870	543730
Q99471	Q99471	1	1	1	Prefoldin subunit 5	PFDN5	sp|Q99471|PFD5_HUMAN Prefoldin subunit 5 OS=Homo sapiens GN=PFDN5 PE=1 SV=2	1	1	1	1	1	1	0	0	1	1	0	0	1	1	0	0	11.7	11.7	11.7	17.328	154	154	0	2.7264	By matching	By MS/MS			0	1222.6	1334.2	1280.8	1592.2	1505.5	1895.4	1274.6	1870	1185.6	0	1152.2	1265.8	1324
Q99497	Q99497	2	2	2	Protein deglycase DJ-1	PARK7	sp|Q99497|PARK7_HUMAN Protein DJ-1 OS=Homo sapiens GN=PARK7 PE=1 SV=2	1	2	2	2	2	2	1	1	2	2	1	1	2	2	1	1	7.9	7.9	7.9	19.891	189	189	0	2.3185	By MS/MS	By MS/MS	By matching	By MS/MS	348.22	52343	45610	47649	33219	39393	37097	31761	42654	39957	615.9	49117	42996	49292
Q99614	Q99614	1	1	1	Tetratricopeptide repeat protein 1	TTC1	sp|Q99614|TTC1_HUMAN Tetratricopeptide repeat protein 1 OS=Homo sapiens GN=TTC1 PE=1 SV=1	1	1	1	1	0	1	1	1	0	1	1	1	0	1	1	1	3.4	3.4	3.4	33.526	292	292	0.0027174	1.591		By MS/MS	By matching	By MS/MS	86.305	29863	27317	29187	22587	26230	23889	19497	35366	26905	216.01	28058	25780	30095
Q99623	Q99623	16	16	16	Prohibitin-2	PHB2	sp|Q99623|PHB2_HUMAN Prohibitin-2 OS=Homo sapiens GN=PHB2 PE=1 SV=2	1	16	16	16	14	15	12	16	14	15	12	16	14	15	12	16	53.8	53.8	53.8	33.296	299	299	0	102.25	By MS/MS	By MS/MS	By MS/MS	By MS/MS	1603.7	510200	433930	501940	556970	524860	482570	418060	468800	535720	2978	479950	412320	519320
Q99832	Q99832	11	11	11	T-complex protein 1 subunit eta	CCT7	sp|Q99832|TCPH_HUMAN T-complex protein 1 subunit eta OS=Homo sapiens GN=CCT7 PE=1 SV=2	1	11	11	11	4	10	4	10	4	10	4	10	4	10	4	10	31.7	31.7	31.7	59.366	543	543	0	94.345	By MS/MS	By MS/MS	By MS/MS	By MS/MS	1142.7	212880	202730	228530	179320	192230	197180	158770	260910	207120	1734.2	200130	191530	233810
Q99873;Q9NR22	Q99873	4;1	4;1	4;1	Protein arginine N-methyltransferase 1	PRMT1	sp|Q99873|ANM1_HUMAN Protein arginine N-methyltransferase 1 OS=Homo sapiens GN=PRMT1 PE=1 SV=2	2	4	4	4	2	4	1	4	2	4	1	4	2	4	1	4	12.5	12.5	12.5	41.515	361	361;394	0	12.2	By matching	By MS/MS	By matching	By MS/MS	660.25	85152	99870	101480	44676	53573	51638	40399	67235	45863	1157.9	79916	93746	102310
Q9BPX3	Q9BPX3	1	1	1	Condensin complex subunit 3	NCAPG	sp|Q9BPX3|CND3_HUMAN Condensin complex subunit 3 OS=Homo sapiens GN=NCAPG PE=1 SV=1	1	1	1	1	1	1	0	1	1	1	0	1	1	1	0	1	0.9	0.9	0.9	114.33	1015	1015	0.0096735	1.0831	By MS/MS	By MS/MS		By matching	80.642	9867.4	13090	14486	10915	14354	11691	10238	14890	7572.4	172.68	9331.5	12358	14623
Q9BQ04;Q9BWF3	Q9BQ04;Q9BWF3	2;2	2;2	2;2	RNA-binding protein 4B;RNA-binding protein 4	RBM4B;RBM4	sp|Q9BQ04|RBM4B_HUMAN RNA-binding protein 4B OS=Homo sapiens GN=RBM4B PE=1 SV=1;sp|Q9BWF3|RBM4_HUMAN RNA-binding protein 4 OS=Homo sapiens GN=RBM4 PE=1 SV=1	2	2	2	2	1	2	0	2	1	2	0	2	1	2	0	2	4.5	4.5	4.5	40.149	359	359;364	0	3.8701	By matching	By MS/MS		By MS/MS	185.29	44777	35564	38556	26552	30315	28617	23165	34291	26999	262.75	41985	33529	40015
Q9BQA1	Q9BQA1	16	16	16	Methylosome protein 50	WDR77	sp|Q9BQA1|MEP50_HUMAN Methylosome protein 50 OS=Homo sapiens GN=WDR77 PE=1 SV=1	1	16	16	16	13	16	15	16	13	16	15	16	13	16	15	16	56.7	56.7	56.7	36.724	342	342	0	323.31	By MS/MS	By MS/MS	By MS/MS	By MS/MS	3824.2	1904500	1438600	1471300	1606300	1554100	1580400	1274100	1389900	1779600	8264.5	1787100	1363500	1551500
Q9BQE3	Q9BQE3	21	3	2	Tubulin alpha-1C chain	TUBA1C	sp|Q9BQE3|TBA1C_HUMAN Tubulin alpha-1C chain OS=Homo sapiens GN=TUBA1C PE=1 SV=1	1	21	3	2	19	19	15	21	2	2	0	3	1	1	0	2	56.8	12	9.1	49.895	449	449	0	14.147	By MS/MS	By MS/MS	By matching	By MS/MS	159.78	64029	57405	64222	52693	61662	58438	52913	82482	75371	211.7	60206	54249	66208
Q9BQG0	Q9BQG0	2	2	2	Myb-binding protein 1A	MYBBP1A	sp|Q9BQG0|MBB1A_HUMAN Myb-binding protein 1A OS=Homo sapiens GN=MYBBP1A PE=1 SV=2	1	2	2	2	0	0	0	2	0	0	0	2	0	0	0	2	1.5	1.5	1.5	148.85	1328	1328	0	3.9653				By MS/MS	0	9282.4	7056.2	9462.2	8994.8	10762	7576	8142.2	10964	9977.9	0	8742.3	6702.1	9789.4
Q9BRP4	Q9BRP4	1	1	1	Proteasomal ATPase-associated factor 1	PAAF1	sp|Q9BRP4|PAAF1_HUMAN Proteasomal ATPase-associated factor 1 OS=Homo sapiens GN=PAAF1 PE=1 SV=2	1	1	1	1	0	1	0	1	0	1	0	1	0	1	0	1	2	2	2	42.19	392	392	0.0076142	1.2102		By matching		By MS/MS	0	3738	2082.1	3207.7	3266.8	3499.3	2830	2302.1	5128.5	3509.3	0	3512.1	1986.2	3356.4
Q9BRS2	Q9BRS2	36	36	36	Serine/threonine-protein kinase RIO1	RIOK1	sp|Q9BRS2|RIOK1_HUMAN Serine/threonine-protein kinase RIO1 OS=Homo sapiens GN=RIOK1 PE=1 SV=2	1	36	36	36	20	35	19	34	20	35	19	34	20	35	19	34	53.7	53.7	53.7	65.582	568	568	0	249.85	By MS/MS	By MS/MS	By MS/MS	By MS/MS	3003	1338100	1415200	1470200	1378600	1430500	1432900	1073600	1658500	1418800	8739.7	1259800	1338400	1507200
Q9BSB4	Q9BSB4	2	2	2	Autophagy-related protein 101	ATG101	sp|Q9BSB4|ATGA1_HUMAN Autophagy-related protein 101 OS=Homo sapiens GN=ATG101 PE=1 SV=1	1	2	2	2	0	2	0	2	0	2	0	2	0	2	0	2	11.9	11.9	11.9	25.002	218	218	0	2.1049		By matching		By MS/MS	94.947	15931	12109	16373	15839	16385	12088	11206	21275	16837	148.33	14989	11514	16870
Q9BSD7	Q9BSD7	3	3	3	Cancer-related nucleoside-triphosphatase	NTPCR	sp|Q9BSD7|NTPCR_HUMAN Cancer-related nucleoside-triphosphatase OS=Homo sapiens GN=NTPCR PE=1 SV=1	1	3	3	3	3	3	2	2	3	3	2	2	3	3	2	2	23.2	23.2	23.2	20.713	190	190	0	14.175	By matching	By MS/MS	By matching	By MS/MS	87.479	47717	43838	46392	43461	48542	47129	37070	64641	46579	205.01	44882	41470	48038
Q9BT22	Q9BT22	1	1	1	Chitobiosyldiphosphodolichol beta-mannosyltransferase	ALG1	sp|Q9BT22|ALG1_HUMAN Chitobiosyldiphosphodolichol beta-mannosyltransferase OS=Homo sapiens GN=ALG1 PE=1 SV=2	1	1	1	1	0	0	0	1	0	0	0	1	0	0	0	1	3.7	3.7	3.7	52.518	464	464	0	7.7365				By MS/MS	0	2701.5	2096.7	1946.5	1815.4	1588.3	1646.1	1764.4	2858	2504.2	0	2529.8	1979.5	2052.9
Q9BT67	Q9BT67	1	1	1	NEDD4 family-interacting protein 1	NDFIP1	sp|Q9BT67|NFIP1_HUMAN NEDD4 family-interacting protein 1 OS=Homo sapiens GN=NDFIP1 PE=1 SV=1	1	1	1	1	1	1	1	1	1	1	1	1	1	1	1	1	7.7	7.7	7.7	24.899	221	221	0	10.472	By MS/MS	By MS/MS	By MS/MS	By MS/MS	0	5452.5	4505	5054.4	13537	7668.6	7940	6213.1	6577.7	8337.5	0	5143.4	4388.1	5315.9
Q9BU76	Q9BU76	1	1	1	Multiple myeloma tumor-associated protein 2	MMTAG2	sp|Q9BU76|MMTA2_HUMAN Multiple myeloma tumor-associated protein 2 OS=Homo sapiens GN=MMTAG2 PE=1 SV=1	1	1	1	1	0	1	0	1	0	1	0	1	0	1	0	1	5.3	5.3	5.3	29.411	263	263	0.0013793	1.6868		By MS/MS		By MS/MS	0	3881.1	2893.9	4107.7	2949.6	3708.4	4097	2916.8	3970.6	3046.3	0	3649.9	2738.3	4213.2
Q9BUA3	Q9BUA3	20	20	20	Uncharacterized protein C11orf84	C11orf84	sp|Q9BUA3|CK084_HUMAN Uncharacterized protein C11orf84 OS=Homo sapiens GN=C11orf84 PE=1 SV=3	1	20	20	20	16	19	17	17	16	19	17	17	16	19	17	17	61.7	61.7	61.7	41.036	381	381	0	179.84	By MS/MS	By MS/MS	By MS/MS	By MS/MS	2949	808490	806020	912330	784270	802800	825800	651710	834690	914370	5594.7	760770	762360	931420
Q9BUJ2	Q9BUJ2	5	5	5	Heterogeneous nuclear ribonucleoprotein U-like protein 1	HNRNPUL1	sp|Q9BUJ2|HNRL1_HUMAN Heterogeneous nuclear ribonucleoprotein U-like protein 1 OS=Homo sapiens GN=HNRNPUL1 PE=1 SV=2	1	5	5	5	2	5	1	5	2	5	1	5	2	5	1	5	5.7	5.7	5.7	95.737	856	856	0	10.635	By matching	By MS/MS	By matching	By MS/MS	457.6	94892	104440	116190	91569	106790	104740	77351	125220	102090	991.47	89420	98652	118170
Q9BVC6	Q9BVC6	2	2	2	Transmembrane protein 109	TMEM109	sp|Q9BVC6|TM109_HUMAN Transmembrane protein 109 OS=Homo sapiens GN=TMEM109 PE=1 SV=1	1	2	2	2	1	2	0	2	1	2	0	2	1	2	0	2	8.6	8.6	8.6	26.21	243	243	0	5.6357	By MS/MS	By MS/MS		By MS/MS	146.45	38604	35209	42343	32007	40753	29357	31593	34676	48303	281.85	36339	33272	43400
Q9BVI4	Q9BVI4	1	1	1	Nucleolar complex protein 4 homolog	NOC4L	sp|Q9BVI4|NOC4L_HUMAN Nucleolar complex protein 4 homolog OS=Homo sapiens GN=NOC4L PE=1 SV=1	1	1	1	1	0	0	0	1	0	0	0	1	0	0	0	1	1.7	1.7	1.7	58.467	516	516	0	1.8868				By MS/MS	0	7174.9	6234.2	7465.6	5305.4	5799.9	5071.4	5387.4	9245.4	7589.3	0	6739.2	5884.4	7640.6
Q9BVK6	Q9BVK6	3	3	2	Transmembrane emp24 domain-containing protein 9	TMED9	sp|Q9BVK6|TMED9_HUMAN Transmembrane emp24 domain-containing protein 9 OS=Homo sapiens GN=TMED9 PE=1 SV=2	1	3	3	2	1	2	2	3	1	2	2	3	1	2	2	2	15.7	15.7	8.5	27.277	235	235	0	4.4976	By MS/MS	By MS/MS	By MS/MS	By MS/MS	199.8	57612	54821	56321	131550	75021	70697	56223	61131	88054	316.95	54312	52948	58731
Q9BVP2	Q9BVP2	4	4	4	Guanine nucleotide-binding protein-like 3	GNL3	sp|Q9BVP2|GNL3_HUMAN Guanine nucleotide-binding protein-like 3 OS=Homo sapiens GN=GNL3 PE=1 SV=2	1	4	4	4	1	4	0	3	1	4	0	3	1	4	0	3	7.3	7.3	7.3	61.992	549	549	0	6.6256	By matching	By MS/MS		By MS/MS	0	32774	34760	37350	33814	43424	36698	26851	44305	33832	0	30922	32868	38394
Q9BWJ5	Q9BWJ5	2	2	2	Splicing factor 3B subunit 5	SF3B5	sp|Q9BWJ5|SF3B5_HUMAN Splicing factor 3B subunit 5 OS=Homo sapiens GN=SF3B5 PE=1 SV=1	1	2	2	2	0	2	1	2	0	2	1	2	0	2	1	2	32.6	32.6	32.6	10.135	86	86	0	6.6354		By MS/MS	By matching	By MS/MS	0	22868	23107	25313	26084	29551	24182	20675	33983	25905	0	21567	21901	26070
Q9BYN8	Q9BYN8	2	2	2	28S ribosomal protein S26, mitochondrial	MRPS26	sp|Q9BYN8|RT26_HUMAN 28S ribosomal protein S26, mitochondrial OS=Homo sapiens GN=MRPS26 PE=1 SV=1	1	2	2	2	1	2	1	1	1	2	1	1	1	2	1	1	13.2	13.2	13.2	24.211	205	205	0	2.0887	By matching	By MS/MS	By matching	By MS/MS	0	12547	11202	14226	9041.5	12023	9970.2	8024.2	10586	9329.3	0	11803	10566	14506
Q9H000	Q9H000	1	1	1	Probable E3 ubiquitin-protein ligase makorin-2	MKRN2	sp|Q9H000|MKRN2_HUMAN Probable E3 ubiquitin-protein ligase makorin-2 OS=Homo sapiens GN=MKRN2 PE=1 SV=2	1	1	1	1	0	1	0	0	0	1	0	0	0	1	0	0	1.9	1.9	1.9	46.94	416	416	0.0039578	1.4126		By MS/MS			72.123	12341	14543	16381	9486.1	11939	9309.5	9679.7	12289	7203.5	175.58	11619	13691	16504
Q9H0U4;Q92928;P51153;Q92930;P61006;P59190	Q9H0U4	6;2;1;1;1;1	6;2;1;1;1;1	2;0;0;0;0;0	Ras-related protein Rab-1B	RAB1B	sp|Q9H0U4|RAB1B_HUMAN Ras-related protein Rab-1B OS=Homo sapiens GN=RAB1B PE=1 SV=1	6	6	6	2	5	6	5	5	5	6	5	5	1	2	1	2	33.8	33.8	12.4	22.171	201	201;201;203;207;207;212	0	44.484	By MS/MS	By MS/MS	By MS/MS	By MS/MS	1059.7	222730	210850	223970	290430	233670	251160	179590	240280	266680	1811.8	209580	200640	231360
Q9H307	Q9H307	21	21	21	Pinin	PNN	sp|Q9H307|PININ_HUMAN Pinin OS=Homo sapiens GN=PNN PE=1 SV=4	1	21	21	21	2	19	2	18	2	19	2	18	2	19	2	18	27.3	27.3	27.3	81.613	717	717	0	79.819	By MS/MS	By MS/MS	By matching	By MS/MS	1657.8	455960	459890	500860	331270	404830	359140	376660	623570	455430	3501.6	428640	433360	511230
Q9H3G5	Q9H3G5	1	1	1	Probable serine carboxypeptidase CPVL	CPVL	sp|Q9H3G5|CPVL_HUMAN Probable serine carboxypeptidase CPVL OS=Homo sapiens GN=CPVL PE=1 SV=2	1	1	1	1	0	1	0	1	0	1	0	1	0	1	0	1	1.7	1.7	1.7	54.163	476	476	0.0039894	1.4642		By matching		By MS/MS	0	12241	8350.9	9335.5	7674.4	9006.7	8310.3	7441.7	14106	10997	0	11478	7890.2	9832.5
Q9H3K6	Q9H3K6	5	5	5	BolA-like protein 2	BOLA2	sp|Q9H3K6|BOLA2_HUMAN BolA-like protein 2 OS=Homo sapiens GN=BOLA2 PE=1 SV=1	1	5	5	5	4	5	5	5	4	5	5	5	4	5	5	5	69.8	69.8	69.8	10.116	86	86	0	34.089	By MS/MS	By MS/MS	By MS/MS	By MS/MS	230.83	214700	198330	211150	226070	235250	255050	179260	247370	254810	1033.3	202080	188020	218850
Q9H3N1	Q9H3N1	2	2	2	Thioredoxin-related transmembrane protein 1	TMX1	sp|Q9H3N1|TMX1_HUMAN Thioredoxin-related transmembrane protein 1 OS=Homo sapiens GN=TMX1 PE=1 SV=1	1	2	2	2	1	1	2	2	1	1	2	2	1	1	2	2	7.9	7.9	7.9	31.791	280	280	0	13.493	By MS/MS	By MS/MS	By MS/MS	By MS/MS	0	55044	41733	45884	61239	50718	49167	36394	46648	54688	0	51705	39752	48139
Q9H3U1	Q9H3U1	2	2	2	Protein unc-45 homolog A	UNC45A	sp|Q9H3U1|UN45A_HUMAN Protein unc-45 homolog A OS=Homo sapiens GN=UNC45A PE=1 SV=1	1	2	2	2	0	2	0	1	0	2	0	1	0	2	0	1	2.9	2.9	2.9	103.08	944	944	0	2.9354		By MS/MS		By matching	0	2929.9	3749.2	3819.9	3568.3	4615.5	4676.8	3400.9	5655.3	3330.8	0	2771.7	3544.1	3901.5
Q9H7D7	Q9H7D7	11	11	11	WD repeat-containing protein 26	WDR26	sp|Q9H7D7|WDR26_HUMAN WD repeat-containing protein 26 OS=Homo sapiens GN=WDR26 PE=1 SV=3	1	11	11	11	1	8	1	8	1	8	1	8	1	8	1	8	19.2	19.2	19.2	72.123	661	661	0	52.788	By matching	By MS/MS	By matching	By MS/MS	705.3	213640	188660	189080	138200	160950	154770	120670	210450	161730	1576.8	200450	177810	196140
Q9H9B4;Q9BWM7	Q9H9B4	9;1	9;1	9;1	Sideroflexin-1	SFXN1	sp|Q9H9B4|SFXN1_HUMAN Sideroflexin-1 OS=Homo sapiens GN=SFXN1 PE=1 SV=4	2	9	9	9	5	8	5	9	5	8	5	9	5	8	5	9	41.3	41.3	41.3	35.619	322	322;321	0	69.683	By MS/MS	By MS/MS	By MS/MS	By MS/MS	744.36	148680	145830	159820	189690	175640	167640	137510	176010	191450	1302.9	140080	138620	164610
Q9UL18;Q9H9G7;Q9HCK5	Q9UL18;Q9H9G7;Q9HCK5	1;1;1	1;1;1	1;1;1	Protein argonaute-1;Protein argonaute-3;Protein argonaute-4	AGO1;AGO3;AGO4	sp|Q9UL18|AGO1_HUMAN Protein argonaute-1 OS=Homo sapiens GN=AGO1 PE=1 SV=3;sp|Q9H9G7|AGO3_HUMAN Protein argonaute-3 OS=Homo sapiens GN=AGO3 PE=1 SV=2;sp|Q9HCK5|AGO4_HUMAN Protein argonaute-4 OS=Homo sapiens GN=AGO4 PE=1 SV=2	3	1	1	1	0	1	0	0	0	1	0	0	0	1	0	0	1.3	1.3	1.3	97.213	857	857;860;861	0.0027211	1.6042		By MS/MS			0	3628.6	3003.2	4326.6	3286.4	2908.1	2844.7	2456.7	3478.4	2059.1	0	3410.1	2844.9	4378.4
Q9HAV4	Q9HAV4	2	2	2	Exportin-5	XPO5	sp|Q9HAV4|XPO5_HUMAN Exportin-5 OS=Homo sapiens GN=XPO5 PE=1 SV=1	1	2	2	2	1	1	2	2	1	1	2	2	1	1	2	2	1.2	1.2	1.2	136.31	1204	1204	0	4.0111	By matching	By MS/MS	By matching	By MS/MS	398.97	39618	37148	41321	24104	29872	28224	22043	38866	31100	614.77	37197	34986	42223
Q9HCE1	Q9HCE1	11	11	11	Putative helicase MOV-10	MOV10	sp|Q9HCE1|MOV10_HUMAN Putative helicase MOV-10 OS=Homo sapiens GN=MOV10 PE=1 SV=2	1	11	11	11	0	11	0	8	0	11	0	8	0	11	0	8	13.2	13.2	13.2	113.67	1003	1003	0	42.892		By MS/MS		By MS/MS	600.82	166120	152910	165540	138070	160030	155180	123340	211450	148840	1103.8	156200	144480	170760
Q9HCK1	Q9HCK1	1	1	1	DBF4-type zinc finger-containing protein 2	ZDBF2	sp|Q9HCK1|ZDBF2_HUMAN DBF4-type zinc finger-containing protein 2 OS=Homo sapiens GN=ZDBF2 PE=1 SV=3	1	1	1	1	0	1	0	1	0	1	0	1	0	1	0	1	1.1	1.1	1.1	265.61	2354	2354	0	18.958		By MS/MS		By matching	0	4694.1	4430.2	4293.8	3738.6	4863.3	4678.7	2963.9	5476.7	3338.3	0	4414.8	4181.1	4475.8
Q9HD45	Q9HD45	1	1	1	Transmembrane 9 superfamily member 3	TM9SF3	sp|Q9HD45|TM9S3_HUMAN Transmembrane 9 superfamily member 3 OS=Homo sapiens GN=TM9SF3 PE=1 SV=2	1	1	1	1	0	1	0	1	0	1	0	1	0	1	0	1	1.4	1.4	1.4	67.887	589	589	0.0063857	1.2528		By MS/MS		By matching	0	11340	11099	12318	11448	13876	13703	9052.8	13115	8202.1	0	10688	10505	12688
Q9NP73	Q9NP73	8	8	8	Putative bifunctional UDP-N-acetylglucosamine transferase and deubiquitinase ALG13	ALG13	sp|Q9NP73|ALG13_HUMAN Putative bifunctional UDP-N-acetylglucosamine transferase and deubiquitinase ALG13 OS=Homo sapiens GN=ALG13 PE=1 SV=2	1	8	8	8	4	8	4	7	4	8	4	7	4	8	4	7	8	8	8	126.05	1137	1137	0	21.719	By matching	By MS/MS	By matching	By MS/MS	693.43	131690	129680	141290	98447	111480	106550	85568	139210	112010	1422.6	123750	122290	144360
Q9NP97;Q8TF09	Q9NP97;Q8TF09	2;1	2;1	2;1	Dynein light chain roadblock-type 1;Dynein light chain roadblock-type 2	DYNLRB1;DYNLRB2	sp|Q9NP97|DLRB1_HUMAN Dynein light chain roadblock-type 1 OS=Homo sapiens GN=DYNLRB1 PE=1 SV=3;sp|Q8TF09|DLRB2_HUMAN Dynein light chain roadblock-type 2 OS=Homo sapiens GN=DYNLRB2 PE=1 SV=1	2	2	2	2	2	2	1	1	2	2	1	1	2	2	1	1	26	26	26	10.921	96	96;96	0	5.2305	By matching	By MS/MS	By matching	By matching	154.66	22386	29420	32303	21985	25697	26159	18854	30198	16894	290.21	21117	27737	32464
Q9NQ92	Q9NQ92	5	5	5	Coordinator of PRMT5 and differentiation stimulator	COPRS	sp|Q9NQ92|COPRS_HUMAN Coordinator of PRMT5 and differentiation stimulator OS=Homo sapiens GN=COPRS PE=1 SV=3	1	5	5	5	2	5	2	5	2	5	2	5	2	5	2	5	27.7	27.7	27.7	20.066	184	184	0	194.88	By matching	By MS/MS	By matching	By MS/MS	222.97	143940	116830	120850	88493	112390	99440	80838	126920	94756	637.17	135060	110140	126150
Q9NR48	Q9NR48	1	1	1	Histone-lysine N-methyltransferase ASH1L	ASH1L	sp|Q9NR48|ASH1L_HUMAN Histone-lysine N-methyltransferase ASH1L OS=Homo sapiens GN=ASH1L PE=1 SV=2	1	1	1	1	1	1	1	1	1	1	1	1	1	1	1	1	0.4	0.4	0.4	332.79	2969	2969	0.0052083	1.3408	By MS/MS	By MS/MS	By MS/MS	By MS/MS	473.28	97938	88520	109570	149030	128240	139010	94602	117060	128530	677	92385	84617	112780
Q9NRP0	Q9NRP0	1	1	1	Oligosaccharyltransferase complex subunit OSTC	OSTC	sp|Q9NRP0|OSTC_HUMAN Oligosaccharyltransferase complex subunit OSTC OS=Homo sapiens GN=OSTC PE=1 SV=1	1	1	1	1	1	1	1	1	1	1	1	1	1	1	1	1	8.1	8.1	8.1	16.829	149	149	0	3.059	By matching	By MS/MS	By matching	By MS/MS	115.44	13208	14019	14584	13459	14158	14255	11199	21960	17514	148.09	12435	13261	14945
Q9NVI7;Q5T9A4;Q5T2N8	Q9NVI7;Q5T9A4	11;10;4	11;10;4	11;10;4	ATPase family AAA domain-containing protein 3A;ATPase family AAA domain-containing protein 3B	ATAD3A;ATAD3B	sp|Q9NVI7|ATD3A_HUMAN ATPase family AAA domain-containing protein 3A OS=Homo sapiens GN=ATAD3A PE=1 SV=2;sp|Q5T9A4|ATD3B_HUMAN ATPase family AAA domain-containing protein 3B OS=Homo sapiens GN=ATAD3B PE=1 SV=1	3	11	11	11	4	10	6	9	4	10	6	9	4	10	6	9	15.1	15.1	15.1	71.368	634	634;648;411	0	27.023	By MS/MS	By MS/MS	By MS/MS	By MS/MS	598.93	186990	160390	177370	173010	185500	179710	133860	210800	177330	1339	175830	151940	183980
Q9NVS9	Q9NVS9	1	1	1	Pyridoxine-5-phosphate oxidase	PNPO	sp|Q9NVS9|PNPO_HUMAN Pyridoxine-5-phosphate oxidase OS=Homo sapiens GN=PNPO PE=1 SV=1	1	1	1	1	0	1	0	1	0	1	0	1	0	1	0	1	5.7	5.7	5.7	29.988	261	261	0	3.9395		By matching		By MS/MS	114.4	16843	17184	14707	9289.8	9920.6	8664.3	7085.7	14555	12326	234.63	15782	16153	15202
Q9NWU2	Q9NWU2	3	3	3	Glucose-induced degradation protein 8 homolog	GID8	sp|Q9NWU2|GID8_HUMAN Glucose-induced degradation protein 8 homolog OS=Homo sapiens GN=GID8 PE=1 SV=1	1	3	3	3	1	3	1	3	1	3	1	3	1	3	1	3	16.2	16.2	16.2	26.748	228	228	0	22.799	By matching	By MS/MS	By MS/MS	By MS/MS	0	61949	79520	92810	60970	74720	79535	54002	83271	74694	244.71	58477	74963	93131
Q9NX40	Q9NX40	1	1	1	OCIA domain-containing protein 1	OCIAD1	sp|Q9NX40|OCAD1_HUMAN OCIA domain-containing protein 1 OS=Homo sapiens GN=OCIAD1 PE=1 SV=1	1	1	1	1	0	1	1	1	0	1	1	1	0	1	1	1	7.3	7.3	7.3	27.626	245	245	0.0097205	1.0919		By matching	By matching	By MS/MS	0	6187.6	5519.3	6373.8	4882.7	3787.4	4161.5	3418.9	6099.6	4462.9	0	5802.6	5212.2	6496.1
Q9NX63	Q9NX63	8	8	8	MICOS complex subunit MIC19	CHCHD3	sp|Q9NX63|MIC19_HUMAN MICOS complex subunit MIC19 OS=Homo sapiens GN=CHCHD3 PE=1 SV=1	1	8	8	8	5	7	5	8	5	7	5	8	5	7	5	8	31.7	31.7	31.7	26.152	227	227	0	35.679	By MS/MS	By MS/MS	By MS/MS	By MS/MS	634	251930	207440	220960	212000	242150	220670	179630	246570	233800	1219.6	236770	196340	230840
Q9NXS2	Q9NXS2	5	5	5	Glutaminyl-peptide cyclotransferase-like protein	QPCTL	sp|Q9NXS2|QPCTL_HUMAN Glutaminyl-peptide cyclotransferase-like protein OS=Homo sapiens GN=QPCTL PE=1 SV=2	1	5	5	5	3	4	3	5	3	4	3	5	3	4	3	5	11.8	11.8	11.8	42.924	382	382	0	12.5	By MS/MS	By MS/MS	By MS/MS	By MS/MS	250.7	102950	80680	87599	78692	86960	78262	67230	93891	85332	477.64	96655	76311	91488
Q9NY12	Q9NY12	7	7	7	H/ACA ribonucleoprotein complex subunit 1	GAR1	sp|Q9NY12|GAR1_HUMAN H/ACA ribonucleoprotein complex subunit 1 OS=Homo sapiens GN=GAR1 PE=1 SV=1	1	7	7	7	0	6	1	4	0	6	1	4	0	6	1	4	29.5	29.5	29.5	22.348	217	217	0	21.826		By MS/MS	By matching	By MS/MS	67.817	64748	71283	74902	89941	103660	102350	69753	109680	71109	183.29	61227	67698	77374
Q9NY99	Q9NY99	1	1	1	Gamma-2-syntrophin	SNTG2	sp|Q9NY99|SNTG2_HUMAN Gamma-2-syntrophin OS=Homo sapiens GN=SNTG2 PE=1 SV=2	1	1	1	1	1	1	1	1	1	1	1	1	1	1	1	1	1.3	1.3	1.3	60.216	539	539	0.0039318	1.3711	By matching	By MS/MS	By matching	By MS/MS	122.96	14300	19562	17114	30901	74863	16061	48073	49100	18093	205.8	13912	18673	19026
Q9NYB9	Q9NYB9	1	1	1	Abl interactor 2	ABI2	sp|Q9NYB9|ABI2_HUMAN Abl interactor 2 OS=Homo sapiens GN=ABI2 PE=1 SV=1	1	1	1	1	1	1	1	1	1	1	1	1	1	1	1	1	2.5	2.5	2.5	55.663	513	513	0.0039947	1.465	By matching	By MS/MS	By matching	By MS/MS	164.39	100410	81402	80262	63267	68885	74661	56159	101270	65673	262.51	94133	76762	83963
Q9NYF8	Q9NYF8	34	34	34	Bcl-2-associated transcription factor 1	BCLAF1	sp|Q9NYF8|BCLF1_HUMAN Bcl-2-associated transcription factor 1 OS=Homo sapiens GN=BCLAF1 PE=1 SV=2	1	34	34	34	21	33	20	31	21	33	20	31	21	33	20	31	32	32	32	106.12	920	920	0	185.97	By MS/MS	By MS/MS	By MS/MS	By MS/MS	4443.9	1214600	1445400	1507500	988600	1118600	996620	1014400	1623800	1270900	11200	1142800	1361200	1524900
Q9NYL9;Q9NZR1	Q9NYL9	4;1	4;1	4;1	Tropomodulin-3	TMOD3	sp|Q9NYL9|TMOD3_HUMAN Tropomodulin-3 OS=Homo sapiens GN=TMOD3 PE=1 SV=1	2	4	4	4	3	1	4	2	3	1	4	2	3	1	4	2	14.2	14.2	14.2	39.594	352	352;351	0	10.996	By MS/MS	By matching	By MS/MS	By matching	313.24	44539	37809	49284	58412	56199	55143	52521	46636	65283	481.46	41996	36076	50723
Q9NZ01	Q9NZ01	3	3	3	Very-long-chain enoyl-CoA reductase	TECR	sp|Q9NZ01|TECR_HUMAN Very-long-chain enoyl-CoA reductase OS=Homo sapiens GN=TECR PE=1 SV=1	1	3	3	3	1	3	1	3	1	3	1	3	1	3	1	3	8.8	8.8	8.8	36.034	308	308	0	3.3743	By matching	By MS/MS	By matching	By MS/MS	0	50194	42199	42651	32417	41440	27021	36054	44707	31930	0	47117	39782	44525
Q9NZB2	Q9NZB2	1	1	1	Constitutive coactivator of PPAR-gamma-like protein 1	FAM120A	sp|Q9NZB2|F120A_HUMAN Constitutive coactivator of PPAR-gamma-like protein 1 OS=Homo sapiens GN=FAM120A PE=1 SV=2	1	1	1	1	0	1	0	0	0	1	0	0	0	1	0	0	1.8	1.8	1.8	121.89	1118	1118	0	3.438		By MS/MS			0	2807.1	3628.5	4034	2671.5	3755.9	3330.8	2261.2	3391.2	1878.5	0	2651.9	3419.1	4069.8
Q9NZI8;REV__Q15833;Q15517	Q9NZI8	18;1;1	18;1;1	17;1;1	Insulin-like growth factor 2 mRNA-binding protein 1	IGF2BP1	sp|Q9NZI8|IF2B1_HUMAN Insulin-like growth factor 2 mRNA-binding protein 1 OS=Homo sapiens GN=IGF2BP1 PE=1 SV=2	3	18	18	17	6	16	7	15	6	16	7	15	6	15	7	14	32.4	32.4	30.2	63.48	577	577;593;529	0	116.89	By matching	By MS/MS	By matching	By MS/MS	1865.1	472690	522940	562100	353400	414550	395650	277360	481290	345070	4373.3	444490	492430	569900
Q9NZJ5	Q9NZJ5	18	18	18	Eukaryotic translation initiation factor 2-alpha kinase 3	EIF2AK3	sp|Q9NZJ5|E2AK3_HUMAN Eukaryotic translation initiation factor 2-alpha kinase 3 OS=Homo sapiens GN=EIF2AK3 PE=1 SV=3	1	18	18	18	10	15	7	17	10	15	7	17	10	15	7	17	20.8	20.8	20.8	125.21	1116	1116	0	88.012	By matching	By MS/MS	By MS/MS	By MS/MS	644.16	380370	368520	397880	364720	394170	365660	296470	498430	404440	1462	357930	348600	409360
Q9NZN8	Q9NZN8	2	2	2	CCR4-NOT transcription complex subunit 2	CNOT2	sp|Q9NZN8|CNOT2_HUMAN CCR4-NOT transcription complex subunit 2 OS=Homo sapiens GN=CNOT2 PE=1 SV=1	1	2	2	2	0	2	1	1	0	2	1	1	0	2	1	1	3.9	3.9	3.9	59.737	540	540	0.001385	1.7063		By MS/MS	By matching	By matching	0	5106.4	8749	9925.3	3426.1	4024	4350.4	3658	5001.5	2873.1	0	4812.8	8201.8	9745.3
Q9NZT1	Q9NZT1	3	3	3	Calmodulin-like protein 5	CALML5	sp|Q9NZT1|CALL5_HUMAN Calmodulin-like protein 5 OS=Homo sapiens GN=CALML5 PE=1 SV=2	1	3	3	3	2	2	1	3	2	2	1	3	2	2	1	3	30.8	30.8	30.8	15.892	146	146	0	34.725	By MS/MS	By MS/MS	By matching	By MS/MS	92.794	68651	57860	73321	57404	63559	59938	56561	68725	69846	326.55	64550	54732	75090
Q9P035	Q9P035	3	3	3	Very-long-chain (3R)-3-hydroxyacyl-CoA dehydratase 3	HACD3	sp|Q9P035|HACD3_HUMAN Very-long-chain (3R)-3-hydroxyacyl-CoA dehydratase 3 OS=Homo sapiens GN=HACD3 PE=1 SV=2	1	3	3	3	2	2	0	3	2	2	0	3	2	2	0	3	11	11	11	43.159	362	362	0	24.244	By matching	By MS/MS		By MS/MS	125.74	43630	41184	38253	32682	31675	32726	25845	49574	40078	297.66	40927	38849	39687
Q9P0J0	Q9P0J0	1	1	1	NADH dehydrogenase [ubiquinone] 1 alpha subcomplex subunit 13	NDUFA13	sp|Q9P0J0|NDUAD_HUMAN NADH dehydrogenase [ubiquinone] 1 alpha subcomplex subunit 13 OS=Homo sapiens GN=NDUFA13 PE=1 SV=3	1	1	1	1	0	1	0	1	0	1	0	1	0	1	0	1	9.7	9.7	9.7	16.698	144	144	0	2.4242		By MS/MS		By MS/MS	0	7396.4	5993.3	7189.1	5909.6	9801.6	6074.4	4281	8549.8	5699.3	0	6973.9	5668.3	7505.9
Q9P0L0	Q9P0L0	3	3	2	Vesicle-associated membrane protein-associated protein A	VAPA	sp|Q9P0L0|VAPA_HUMAN Vesicle-associated membrane protein-associated protein A OS=Homo sapiens GN=VAPA PE=1 SV=3	1	3	3	2	1	2	1	1	1	2	1	1	1	1	1	1	9.6	9.6	6	27.893	249	249	0.0039841	1.4529	By matching	By MS/MS	By MS/MS	By MS/MS	49.068	28707	27213	25783	58139	30090	35373	24327	33141	34407	132.46	27000	26179	26937
Q9P1Y5	Q9P1Y5	8	8	8	Calmodulin-regulated spectrin-associated protein 3	CAMSAP3	sp|Q9P1Y5|CAMP3_HUMAN Calmodulin-regulated spectrin-associated protein 3 OS=Homo sapiens GN=CAMSAP3 PE=1 SV=2	1	8	8	8	4	7	2	8	4	7	2	8	4	7	2	8	8.5	8.5	8.5	134.75	1249	1249	0	31.531	By matching	By MS/MS	By matching	By MS/MS	331.48	140900	111950	122390	84868	96552	93555	74155	122390	92786	552.85	132130	105540	126940
Q9P219	Q9P219	28	28	28	Protein Daple	CCDC88C	sp|Q9P219|DAPLE_HUMAN Protein Daple OS=Homo sapiens GN=CCDC88C PE=1 SV=3	1	28	28	28	12	24	12	26	12	24	12	26	12	24	12	26	14.5	14.5	14.5	228.23	2028	2028	0	126.99	By matching	By MS/MS	By MS/MS	By MS/MS	816.71	398090	374890	401940	340180	366010	348320	296320	448980	370370	1681.9	374200	354210	413650
Q9P2R3	Q9P2R3	23	23	23	Rabankyrin-5	ANKFY1	sp|Q9P2R3|ANFY1_HUMAN Rabankyrin-5 OS=Homo sapiens GN=ANKFY1 PE=1 SV=2	1	23	23	23	0	22	1	22	0	22	1	22	0	22	1	22	23	23	23	128.4	1169	1169	0	178.15		By MS/MS	By matching	By MS/MS	785.14	424150	459600	485070	303840	343380	331310	263370	446190	338160	1854.9	398570	432640	492570
Q9UBB4	Q9UBB4	5	5	5	Ataxin-10	ATXN10	sp|Q9UBB4|ATX10_HUMAN Ataxin-10 OS=Homo sapiens GN=ATXN10 PE=1 SV=1	1	5	5	5	3	5	5	4	3	5	5	4	3	5	5	4	11.2	11.2	11.2	53.488	475	475	0	12.954	By matching	By MS/MS	By MS/MS	By MS/MS	243.53	103680	92093	107640	88942	91965	90823	70579	126670	90632	522.08	97442	87090	110410
Q9UBM7	Q9UBM7	2	2	2	7-dehydrocholesterol reductase	DHCR7	sp|Q9UBM7|DHCR7_HUMAN 7-dehydrocholesterol reductase OS=Homo sapiens GN=DHCR7 PE=1 SV=1	1	2	2	2	1	2	1	2	1	2	1	2	1	2	1	2	6.1	6.1	6.1	54.489	475	475	0	4.4379	By matching	By MS/MS	By matching	By MS/MS	88.407	12038	13478	12826	12074	14360	11981	10763	16812	10244	151.67	11343	12736	13225
Q9UBQ5	Q9UBQ5	2	2	2	Eukaryotic translation initiation factor 3 subunit K	EIF3K	sp|Q9UBQ5|EIF3K_HUMAN Eukaryotic translation initiation factor 3 subunit K OS=Homo sapiens GN=EIF3K PE=1 SV=1	1	2	2	2	0	2	0	2	0	2	0	2	0	2	0	2	11.5	11.5	11.5	25.059	218	218	0	5.7153		By MS/MS		By matching	169.28	11379	13541	14168	10581	13746	14407	9808.1	14031	8963.8	208.92	10731	12780	14416
Q9UBS4	Q9UBS4	2	2	2	DnaJ homolog subfamily B member 11	DNAJB11	sp|Q9UBS4|DJB11_HUMAN DnaJ homolog subfamily B member 11 OS=Homo sapiens GN=DNAJB11 PE=1 SV=1	1	2	2	2	1	2	1	2	1	2	1	2	1	2	1	2	6.7	6.7	6.7	40.513	358	358	0	2.8613	By matching	By MS/MS	By matching	By MS/MS	117.09	37906	33196	36911	29812	33111	32056	25018	40218	27774	194.99	35613	31363	38068
Q9UFG5	Q9UFG5	1	1	1	UPF0449 protein C19orf25	C19orf25	sp|Q9UFG5|CS025_HUMAN UPF0449 protein C19orf25 OS=Homo sapiens GN=C19orf25 PE=1 SV=2	1	1	1	1	1	1	0	0	1	1	0	0	1	1	0	0	18.6	18.6	18.6	12.878	118	118	0.0040323	1.524	By matching	By MS/MS			0	1369.4	1675.3	1556.4	1449.7	1573.8	1797.6	1261.1	2397.8	1429.5	0	1290.3	1581.6	1593.8
Q9UG63	Q9UG63	1	1	1	ATP-binding cassette sub-family F member 2	ABCF2	sp|Q9UG63|ABCF2_HUMAN ATP-binding cassette sub-family F member 2 OS=Homo sapiens GN=ABCF2 PE=1 SV=2	1	1	1	1	0	1	0	1	0	1	0	1	0	1	0	1	2.4	2.4	2.4	71.289	623	623	0	2.698		By matching		By MS/MS	0	4119	3447.4	3800.6	3183.2	2852.5	3385.6	2044.7	4281.3	3446.7	0	3863.5	3257.5	3919.9
Q9UGP8	Q9UGP8	1	1	1	Translocation protein SEC63 homolog	SEC63	sp|Q9UGP8|SEC63_HUMAN Translocation protein SEC63 homolog OS=Homo sapiens GN=SEC63 PE=1 SV=2	1	1	1	1	0	1	1	1	0	1	1	1	0	1	1	1	1.1	1.1	1.1	87.996	760	760	0.0063939	1.2559		By matching	By matching	By MS/MS	61.907	13573	12440	14237	10514	10994	9810.4	8457.8	14968	14145	150.39	12750	11745	14561
Q9UH99;O94901	Q9UH99	25;1	25;1	25;1	SUN domain-containing protein 2	SUN2	sp|Q9UH99|SUN2_HUMAN SUN domain-containing protein 2 OS=Homo sapiens GN=SUN2 PE=1 SV=3	2	25	25	25	22	24	20	23	22	24	20	23	22	24	20	23	45.5	45.5	45.5	80.31	717	717;812	0	286.64	By MS/MS	By MS/MS	By MS/MS	By MS/MS	2452.8	759140	700940	767480	847080	761670	741620	587170	765580	816150	3755.2	714070	665290	791460
Q9UHV9	Q9UHV9	1	1	1	Prefoldin subunit 2	PFDN2	sp|Q9UHV9|PFD2_HUMAN Prefoldin subunit 2 OS=Homo sapiens GN=PFDN2 PE=1 SV=1	1	1	1	1	0	1	0	1	0	1	0	1	0	1	0	1	9.1	9.1	9.1	16.648	154	154	0	4.6399		By MS/MS		By MS/MS	0	7609.9	6275.8	7469.4	5600.9	6190.3	6091.1	4625.4	8186.3	6736.5	0	7146.4	5927.3	7685.4
Q9UI26	Q9UI26	1	1	1	Importin-11	IPO11	sp|Q9UI26|IPO11_HUMAN Importin-11 OS=Homo sapiens GN=IPO11 PE=1 SV=1	1	1	1	1	0	0	0	1	0	0	0	1	0	0	0	1	2.1	2.1	2.1	112.53	975	975	0.0013736	1.6561				By MS/MS	0	1414.6	1104.7	1704.2	997.94	993.59	1076	796.39	1518	1171	0	1328.5	1043.6	1719.4
Q9UJS0	Q9UJS0	3	3	3	Calcium-binding mitochondrial carrier protein Aralar2	SLC25A13	sp|Q9UJS0|CMC2_HUMAN Calcium-binding mitochondrial carrier protein Aralar2 OS=Homo sapiens GN=SLC25A13 PE=1 SV=2	1	3	3	3	0	3	0	3	0	3	0	3	0	3	0	3	6.4	6.4	6.4	74.175	675	675	0	5.2681		By MS/MS		By MS/MS	183.84	26663	32198	39010	17423	20248	24318	16336	24336	20830	354.36	25076	30264	38888
Q9UJZ1	Q9UJZ1	4	4	4	Stomatin-like protein 2, mitochondrial	STOML2	sp|Q9UJZ1|STML2_HUMAN Stomatin-like protein 2, mitochondrial OS=Homo sapiens GN=STOML2 PE=1 SV=1	1	4	4	4	2	3	2	2	2	3	2	2	2	3	2	2	19.4	19.4	19.4	38.534	356	356	0	57.795	By MS/MS	By MS/MS	By MS/MS	By MS/MS	228.05	85248	64099	61723	78172	72870	76299	57973	77669	80285	510.36	80000	60849	65674
Q9UKM9	Q9UKM9	2	2	2	RNA-binding protein Raly	RALY	sp|Q9UKM9|RALY_HUMAN RNA-binding protein Raly OS=Homo sapiens GN=RALY PE=1 SV=1	1	2	2	2	0	2	0	2	0	2	0	2	0	2	0	2	6.2	6.2	6.2	32.463	306	306	0	3.1399		By MS/MS		By MS/MS	0	20096	18373	19472	14533	15704	14730	11843	22198	16922	0	18866	17327	20041
Q9UKV3	Q9UKV3	9	9	9	Apoptotic chromatin condensation inducer in the nucleus	ACIN1	sp|Q9UKV3|ACINU_HUMAN Apoptotic chromatin condensation inducer in the nucleus OS=Homo sapiens GN=ACIN1 PE=1 SV=2	1	9	9	9	1	9	1	8	1	9	1	8	1	9	1	8	8.4	8.4	8.4	151.86	1341	1341	0	40.297	By matching	By MS/MS	By matching	By MS/MS	451.15	134770	125810	133930	102180	124160	99957	107140	170190	110420	847.28	126680	118720	138040
Q9UKV8	Q9UKV8	1	1	1	Protein argonaute-2	AGO2	sp|Q9UKV8|AGO2_HUMAN Protein argonaute-2 OS=Homo sapiens GN=AGO2 PE=1 SV=3	1	1	1	1	0	0	0	1	0	0	0	1	0	0	0	1	1.3	1.3	1.3	97.207	859	859	0	2.502				By MS/MS	0	0	0	0	0	0	0	0	0	0	0	0	0	0
Q9ULV0;Q9Y4I1	Q9ULV0;Q9Y4I1	1;1	1;1	1;1	Unconventional myosin-Vb;Unconventional myosin-Va	MYO5B;MYO5A	sp|Q9ULV0|MYO5B_HUMAN Unconventional myosin-Vb OS=Homo sapiens GN=MYO5B PE=1 SV=3;sp|Q9Y4I1|MYO5A_HUMAN Unconventional myosin-Va OS=Homo sapiens GN=MYO5A PE=1 SV=2	2	1	1	1	0	0	1	0	0	0	1	0	0	0	1	0	0.4	0.4	0.4	213.67	1848	1848;1855	0.0013831	1.7019			By MS/MS		0	0	0	0	0	0	0	0	0	0	0	0	0	0
Q9UM54	Q9UM54	7	7	7	Unconventional myosin-VI	MYO6	sp|Q9UM54|MYO6_HUMAN Unconventional myosin-VI OS=Homo sapiens GN=MYO6 PE=1 SV=4	1	7	7	7	2	5	1	5	2	5	1	5	2	5	1	5	5.2	5.2	5.2	149.69	1294	1294	0	11.753	By matching	By MS/MS	By matching	By MS/MS	99.254	68789	70140	74996	52082	58966	54962	59181	106670	75104	162.71	64650	66105	76540
Q9UMS4	Q9UMS4	4	4	4	Pre-mRNA-processing factor 19	PRPF19	sp|Q9UMS4|PRP19_HUMAN Pre-mRNA-processing factor 19 OS=Homo sapiens GN=PRPF19 PE=1 SV=1	1	4	4	4	3	4	2	4	3	4	2	4	3	4	2	4	8.5	8.5	8.5	55.18	504	504	0	20.334	By MS/MS	By MS/MS	By matching	By MS/MS	428.57	93795	108010	120680	84853	97621	91209	75894	130480	101460	977.85	88348	101880	122040
Q9UN70	Q9UN70	1	1	1	Protocadherin gamma-C3	PCDHGC3	sp|Q9UN70|PCDGK_HUMAN Protocadherin gamma-C3 OS=Homo sapiens GN=PCDHGC3 PE=1 SV=1	1	1	1	1	1	1	1	1	1	1	1	1	1	1	1	1	1.1	1.1	1.1	101.08	934	934	0.0052356	1.3583	By MS/MS	By MS/MS	By MS/MS	By MS/MS	0	14764	7187.8	3871.2	17490	11638	7059.8	35699	17821	42610	0	13822	6943.8	4975
Q9UNL2	Q9UNL2	1	1	1	Translocon-associated protein subunit gamma	SSR3	sp|Q9UNL2|SSRG_HUMAN Translocon-associated protein subunit gamma OS=Homo sapiens GN=SSR3 PE=1 SV=1	1	1	1	1	0	1	1	1	0	1	1	1	0	1	1	1	7.6	7.6	7.6	21.08	185	185	0	4.7971		By matching	By MS/MS	By MS/MS	87.53	28554	22817	24801	48193	24414	28435	19513	25838	32990	148.9	26812	21945	25855
Q9UNM6	Q9UNM6	3	3	3	26S proteasome non-ATPase regulatory subunit 13	PSMD13	sp|Q9UNM6|PSD13_HUMAN 26S proteasome non-ATPase regulatory subunit 13 OS=Homo sapiens GN=PSMD13 PE=1 SV=2	1	3	3	3	0	3	1	2	0	3	1	2	0	3	1	2	6.9	6.9	6.9	42.945	376	376	0	4.4025		By MS/MS	By matching	By MS/MS	57.203	34425	42394	45240	31533	79488	38613	30820	50878	36804	153.36	32755	39955	46858
Q9UQ35	Q9UQ35	76	76	76	Serine/arginine repetitive matrix protein 2	SRRM2	sp|Q9UQ35|SRRM2_HUMAN Serine/arginine repetitive matrix protein 2 OS=Homo sapiens GN=SRRM2 PE=1 SV=2	1	76	76	76	19	74	16	72	19	74	16	72	19	74	16	72	30.2	30.2	30.2	299.61	2752	2752	0	323.31	By MS/MS	By MS/MS	By MS/MS	By MS/MS	4338.5	1687300	1655100	1721900	1117700	1390800	1168400	1255500	1839500	1382700	9082.6	1584900	1558400	1766000
Q9UQ80	Q9UQ80	1	1	1	Proliferation-associated protein 2G4	PA2G4	sp|Q9UQ80|PA2G4_HUMAN Proliferation-associated protein 2G4 OS=Homo sapiens GN=PA2G4 PE=1 SV=3	1	1	1	1	1	0	0	0	1	0	0	0	1	0	0	0	2.3	2.3	2.3	43.786	394	394	0.0052219	1.3548	By MS/MS				184.46	21986	7896.8	12459	9713.5	12302	11773	10256	5861.7	14703	230.63	20572	7508.3	13529
Q9Y224	Q9Y224	2	2	2	UPF0568 protein C14orf166	C14orf166	sp|Q9Y224|CN166_HUMAN UPF0568 protein C14orf166 OS=Homo sapiens GN=C14orf166 PE=1 SV=1	1	2	2	2	1	2	0	2	1	2	0	2	1	2	0	2	9.8	9.8	9.8	28.068	244	244	0	3.8275	By matching	By MS/MS		By matching	65.257	18217	24110	25711	20092	23602	22517	16442	26359	15129	187.37	17202	22756	25953
Q9Y230	Q9Y230	11	11	11	RuvB-like 2	RUVBL2	sp|Q9Y230|RUVB2_HUMAN RuvB-like 2 OS=Homo sapiens GN=RUVBL2 PE=1 SV=3	1	11	11	11	7	10	7	9	7	10	7	9	7	10	7	9	29.4	29.4	29.4	51.156	463	463	0	50	By MS/MS	By MS/MS	By MS/MS	By MS/MS	665.9	224690	206500	235760	250290	258950	265380	197670	269700	261530	1161.5	211630	196000	243200
Q9Y262	Q9Y262	5	5	5	Eukaryotic translation initiation factor 3 subunit L	EIF3L	sp|Q9Y262|EIF3L_HUMAN Eukaryotic translation initiation factor 3 subunit L OS=Homo sapiens GN=EIF3L PE=1 SV=1	1	5	5	5	0	3	0	5	0	3	0	5	0	3	0	5	9.2	9.2	9.2	66.726	564	564	0	12.38		By MS/MS		By MS/MS	0	56152	64002	67179	51229	60700	56990	48072	79901	60740	0	52889	60365	68389
Q9Y265	Q9Y265	11	11	11	RuvB-like 1	RUVBL1	sp|Q9Y265|RUVB1_HUMAN RuvB-like 1 OS=Homo sapiens GN=RUVBL1 PE=1 SV=1	1	11	11	11	6	8	7	9	6	8	7	9	6	8	7	9	31.6	31.6	31.6	50.227	456	456	0	92.061	By MS/MS	By MS/MS	By MS/MS	By MS/MS	679.11	176170	160350	190410	184440	192020	182100	143280	210550	201930	838.86	165870	152070	195580
Q9Y266	Q9Y266	1	1	1	Nuclear migration protein nudC	NUDC	sp|Q9Y266|NUDC_HUMAN Nuclear migration protein nudC OS=Homo sapiens GN=NUDC PE=1 SV=1	1	1	1	1	1	0	0	1	1	0	0	1	1	0	0	1	2.4	2.4	2.4	38.242	331	331	0.0097561	1.108	By MS/MS			By matching	247.34	20453	7325	11969	7648.7	8871.2	11504	13453	5184.7	14641	284.91	19119	6950.8	12870
Q9Y277	Q9Y277	1	1	1	Voltage-dependent anion-selective channel protein 3	VDAC3	sp|Q9Y277|VDAC3_HUMAN Voltage-dependent anion-selective channel protein 3 OS=Homo sapiens GN=VDAC3 PE=1 SV=1	1	1	1	1	0	1	1	1	0	1	1	1	0	1	1	1	4.6	4.6	4.6	30.658	283	283	0	3.4096		By matching	By matching	By MS/MS	0	7509.7	7254.3	7579	5005.9	4158	6516.8	2675.7	6196.5	5547.6	0	7038.6	6830.9	7725.9
Q9Y285	Q9Y285	2	2	2	Phenylalanine--tRNA ligase alpha subunit	FARSA	sp|Q9Y285|SYFA_HUMAN Phenylalanine--tRNA ligase alpha subunit OS=Homo sapiens GN=FARSA PE=1 SV=3	1	2	2	2	1	1	1	2	1	1	1	2	1	1	1	2	3.9	3.9	3.9	57.563	508	508	0	3.7863	By matching	By matching	By matching	By MS/MS	256.06	19217	16514	17892	15545	17600	15390	15711	25898	22423	361.54	18058	15626	18554
Q9Y2H1	Q9Y2H1	24	19	19	Serine/threonine-protein kinase 38-like	STK38L	sp|Q9Y2H1|ST38L_HUMAN Serine/threonine-protein kinase 38-like OS=Homo sapiens GN=STK38L PE=1 SV=3	1	24	19	19	22	23	20	22	17	18	15	17	17	18	15	17	47.8	40.7	40.7	54.002	464	464	0	88.718	By MS/MS	By MS/MS	By MS/MS	By MS/MS	2828.6	758370	863590	986680	974340	960620	935420	740250	969100	996660	5709.8	715650	818660	1001600
Q9Y2R0	Q9Y2R0	1	1	1	Cytochrome c oxidase assembly factor 3 homolog, mitochondrial	COA3	sp|Q9Y2R0|COA3_HUMAN Cytochrome c oxidase assembly factor 3 homolog, mitochondrial OS=Homo sapiens GN=COA3 PE=1 SV=1	1	1	1	1	1	1	1	1	1	1	1	1	1	1	1	1	8.5	8.5	8.5	11.731	106	106	0	2.376	By matching	By matching	By matching	By MS/MS	0	5130.1	3351.6	3161.8	2994.9	4893.2	3189.6	3932.8	4096.9	7267.8	0	4816.1	3165.5	3449.4
Q9Y2W1	Q9Y2W1	37	37	37	Thyroid hormone receptor-associated protein 3	THRAP3	sp|Q9Y2W1|TR150_HUMAN Thyroid hormone receptor-associated protein 3 OS=Homo sapiens GN=THRAP3 PE=1 SV=2	1	37	37	37	19	36	18	36	19	36	18	36	19	36	18	36	33.8	33.8	33.8	108.66	955	955	0	226.02	By MS/MS	By MS/MS	By MS/MS	By MS/MS	3658.2	1019700	1124300	1231300	732920	882650	794510	755460	1083300	935430	8320.7	958900	1058300	1246600
Q9Y383;Q9NQ29	Q9Y383	7;3	7;3	7;3	Putative RNA-binding protein Luc7-like 2	LUC7L2	sp|Q9Y383|LC7L2_HUMAN Putative RNA-binding protein Luc7-like 2 OS=Homo sapiens GN=LUC7L2 PE=1 SV=2	2	7	7	7	5	7	2	7	5	7	2	7	5	7	2	7	18.9	18.9	18.9	46.513	392	392;371	0	25.817	By matching	By MS/MS	By matching	By MS/MS	512.95	113770	125710	132670	109610	154670	114510	104440	149550	122350	941.53	107380	118730	136210
Q9Y3B3	Q9Y3B3	2	2	2	Transmembrane emp24 domain-containing protein 7	TMED7	sp|Q9Y3B3|TMED7_HUMAN Transmembrane emp24 domain-containing protein 7 OS=Homo sapiens GN=TMED7 PE=1 SV=2	1	2	2	2	1	1	1	2	1	1	1	2	1	1	1	2	8.5	8.5	8.5	25.171	224	224	0	4.5263	By MS/MS	By MS/MS	By MS/MS	By MS/MS	0	19586	14084	17143	17031	16580	16916	12075	19021	18533	0	18390	13364	17852
Q9Y3B4	Q9Y3B4	4	4	4	Splicing factor 3B subunit 6	SF3B6	sp|Q9Y3B4|SF3B6_HUMAN Splicing factor 3B subunit 6 OS=Homo sapiens GN=SF3B6 PE=1 SV=1	1	4	4	4	4	4	1	4	4	4	1	4	4	4	1	4	34.4	34.4	34.4	14.585	125	125	0	10.241	By matching	By MS/MS	By matching	By MS/MS	105.64	61219	77887	78123	70460	83476	76415	60324	96374	69565	273.62	57809	73582	79590
Q9Y3D0	Q9Y3D0	1	1	1	Mitotic spindle-associated MMXD complex subunit MIP18	FAM96B	sp|Q9Y3D0|MIP18_HUMAN Mitotic spindle-associated MMXD complex subunit MIP18 OS=Homo sapiens GN=FAM96B PE=1 SV=1	1	1	1	1	0	1	1	1	0	1	1	1	0	1	1	1	12.9	12.9	12.9	17.663	163	163	0	1.8944		By MS/MS	By matching	By matching	121.08	2401.2	1994.7	1919.7	2200	2177.2	2212.9	2368.8	3551.7	1512	127.61	2255	1898.1	2022.5
Q9Y3I0	Q9Y3I0	2	2	2	tRNA-splicing ligase RtcB homolog	RTCB	sp|Q9Y3I0|RTCB_HUMAN tRNA-splicing ligase RtcB homolog OS=Homo sapiens GN=RTCB PE=1 SV=1	1	2	2	2	0	2	0	2	0	2	0	2	0	2	0	2	5	5	5	55.21	505	505	0	6.274		By MS/MS		By MS/MS	165.26	22559	24355	29250	23418	26658	26137	20132	32635	24856	231.41	21273	23038	29650
Q9Y3U8	Q9Y3U8	3	3	3	60S ribosomal protein L36	RPL36	sp|Q9Y3U8|RL36_HUMAN 60S ribosomal protein L36 OS=Homo sapiens GN=RPL36 PE=1 SV=3	1	3	3	3	3	3	2	2	3	3	2	2	3	3	2	2	30.5	30.5	30.5	12.254	105	105	0	3.9377	By MS/MS	By MS/MS	By MS/MS	By MS/MS	520.19	105280	75544	81405	88036	88064	82110	63690	83464	88620	684.74	98802	71673	85893
Q9Y3Y2	Q9Y3Y2	2	2	2	Chromatin target of PRMT1 protein	CHTOP	sp|Q9Y3Y2|CHTOP_HUMAN Chromatin target of PRMT1 protein OS=Homo sapiens GN=CHTOP PE=1 SV=2	1	2	2	2	1	1	1	2	1	1	1	2	1	1	1	2	9.3	9.3	9.3	26.396	248	248	0	5.4945	By MS/MS	By matching	By matching	By MS/MS	52.221	21341	16692	22873	16734	21014	20075	16098	22397	22908	122.52	20075	15795	23451
Q9Y4E8	Q9Y4E8	10	10	10	Ubiquitin carboxyl-terminal hydrolase 15	USP15	sp|Q9Y4E8|UBP15_HUMAN Ubiquitin carboxyl-terminal hydrolase 15 OS=Homo sapiens GN=USP15 PE=1 SV=3	1	10	10	10	1	7	2	10	1	7	2	10	1	7	2	10	11.6	11.6	11.6	112.42	981	981	0	36.06	By matching	By MS/MS	By MS/MS	By MS/MS	853.93	229490	224810	229400	141610	164400	156660	131680	219370	168990	2111.1	215370	211560	235040
Q9Y5M8	Q9Y5M8	2	2	2	Signal recognition particle receptor subunit beta	SRPRB	sp|Q9Y5M8|SRPRB_HUMAN Signal recognition particle receptor subunit beta OS=Homo sapiens GN=SRPRB PE=1 SV=3	1	2	2	2	1	2	0	1	1	2	0	1	1	2	0	1	7.4	7.4	7.4	29.702	271	271	0	4.533	By matching	By MS/MS		By MS/MS	0	15183	13119	13185	12447	13216	13091	9902.7	15165	12302	0	14259	12401	13751
Q9Y5S9	Q9Y5S9	4	4	4	RNA-binding protein 8A	RBM8A	sp|Q9Y5S9|RBM8A_HUMAN RNA-binding protein 8A OS=Homo sapiens GN=RBM8A PE=1 SV=1	1	4	4	4	3	4	4	4	3	4	4	4	3	4	4	4	17.2	17.2	17.2	19.889	174	174	0	52.597	By matching	By MS/MS	By MS/MS	By MS/MS	465.89	184150	153540	157120	100180	110670	111570	103320	166640	132780	1034.8	172560	144530	162840
Q9Y657;Q5JUX0;Q56A73;Q9BPZ2;Q99865	Q9Y657	11;3;1;1;1	11;3;1;1;1	11;3;1;1;1	Spindlin-1	SPIN1	sp|Q9Y657|SPIN1_HUMAN Spindlin-1 OS=Homo sapiens GN=SPIN1 PE=1 SV=3	5	11	11	11	11	10	9	11	11	10	9	11	11	10	9	11	49.2	49.2	49.2	29.6	262	262;258;249;258;258	0	57.712	By MS/MS	By MS/MS	By MS/MS	By MS/MS	2196.2	498160	458960	499330	445760	475060	473690	380440	546830	471750	3401.6	468380	434130	514680
Q9Y678;Q9UBF2	Q9Y678;Q9UBF2	2;1	2;1	2;1	Coatomer subunit gamma-1;Coatomer subunit gamma-2	COPG1;COPG2	sp|Q9Y678|COPG1_HUMAN Coatomer subunit gamma-1 OS=Homo sapiens GN=COPG1 PE=1 SV=1;sp|Q9UBF2|COPG2_HUMAN Coatomer subunit gamma-2 OS=Homo sapiens GN=COPG2 PE=1 SV=1	2	2	2	2	0	1	1	1	0	1	1	1	0	1	1	1	3.1	3.1	3.1	97.717	874	874;871	0	13.431		By MS/MS	By MS/MS	By MS/MS	0	0	0	0	0	0	0	0	0	0	0	0	0	0
Q9Y6G9	Q9Y6G9	1	1	1	Cytoplasmic dynein 1 light intermediate chain 1	DYNC1LI1	sp|Q9Y6G9|DC1L1_HUMAN Cytoplasmic dynein 1 light intermediate chain 1 OS=Homo sapiens GN=DYNC1LI1 PE=1 SV=3	1	1	1	1	1	1	1	1	1	1	1	1	1	1	1	1	1.3	1.3	1.3	56.578	523	523	0.007472	1.1668	By matching	By MS/MS	By matching	By matching	64.463	13968	14508	15601	13204	17828	17243	13304	17566	11126	168.19	13173	13710	16048
Q9Y6M1	Q9Y6M1	2	1	1	Insulin-like growth factor 2 mRNA-binding protein 2	IGF2BP2	sp|Q9Y6M1|IF2B2_HUMAN Insulin-like growth factor 2 mRNA-binding protein 2 OS=Homo sapiens GN=IGF2BP2 PE=1 SV=2	1	2	1	1	0	2	0	2	0	1	0	1	0	1	0	1	4.8	2.7	2.7	66.121	599	599	0	5.058		By MS/MS		By matching	0	2356.8	2176.6	2358.2	1836.1	2711.2	2770.6	1906.9	2664.4	1767.9	0	2219.3	2054.3	2443.6
Q9Y6Y0	Q9Y6Y0	15	15	15	Influenza virus NS1A-binding protein	IVNS1ABP	sp|Q9Y6Y0|NS1BP_HUMAN Influenza virus NS1A-binding protein OS=Homo sapiens GN=IVNS1ABP PE=1 SV=3	1	15	15	15	11	15	7	13	11	15	7	13	11	15	7	13	20.6	20.6	20.6	71.729	642	642	0	44.726	By MS/MS	By MS/MS	By MS/MS	By MS/MS	1329.8	505510	511510	536540	382000	466410	383910	336200	479630	388320	3666.9	475290	482150	549740
[truncated: 167 more columns]

## Sheet: Raw & normalised, LotB; SidC
Protein IDs	Majority protein IDs	Peptide counts (all)	Peptide counts (razor+unique)	Peptide counts (unique)	Protein names	Gene names	Fasta headers	Number of proteins	Peptides	Razor + unique peptides	Unique peptides	Peptides A1-tmt9test	Peptides A2-tmt9test	Peptides c1-tmt9test	Peptides c2-tmt9test	Razor + unique peptides A1-tmt9test	Razor + unique peptides A2-tmt9test	Razor + unique peptides c1-tmt9test	Razor + unique peptides c2-tmt9test	Unique peptides A1-tmt9test	Unique peptides A2-tmt9test	Unique peptides c1-tmt9test	Unique peptides c2-tmt9test	Sequence coverage [%]	Unique + razor sequence coverage [%]	Unique sequence coverage [%]	Mol. weight [kDa]	Sequence length	Sequence lengths	Q-value	Score	Identification type A1-tmt9test	Identification type A2-tmt9test	Identification type c1-tmt9test	Identification type c2-tmt9test	Reporter intensity corrected 1	Reporter intensity corrected 2	Reporter intensity corrected 3	Reporter intensity corrected 4	Reporter intensity corrected 5	Reporter intensity corrected 6	Reporter intensity corrected 7	Reporter intensity corrected 8	Reporter intensity corrected 9	Reporter intensity corrected 10	Reporter intensity 1	Reporter intensity 2	Reporter intensity 3	Reporter intensity 4
A2NJV5;A0A0A0MRZ7;A0A075B6S2;A0A075B6S6;A0A075B6P5;A0A087WW87;P06310;P01615;P01614	A2NJV5;A0A0A0MRZ7;A0A075B6S2;A0A075B6S6;A0A075B6P5;A0A087WW87;P06310;P01615;P01614	3;3;3;2;2;2;2;2;2	3;3;3;2;2;2;2;2;2	3;3;3;2;2;2;2;2;2	Ig kappa chain V-II region RPMI 6410;Ig kappa chain V-II region FR;Ig kappa chain V-II region Cum	IGKV A18;IGKV2D-26;IGKV2D-29;IGKV2D-30;IGKV2D-28;IGKV2-40	sp|A2NJV5|KV229_HUMAN Immunoglobulin kappa variable 2-29 OS=Homo sapiens GN=IGKV2-29 PE=3 SV=2;sp|A0A0A0MRZ7|KVD26_HUMAN Immunoglobulin kappa variable 2D-26 OS=Homo sapiens GN=IGKV2D-26 PE=3 SV=1;sp|A0A075B6S2|KVD29_HUMAN Immunoglobulin kappa variable 2D-2	9	3	3	3	3	3	3	3	3	3	3	3	3	3	3	3	19.2	19.2	19.2	13.085	120	120;120;120;120;120;121;120;120;121	0	160.18	By MS/MS	By MS/MS	By MS/MS	By MS/MS	8316.7	1466700	1500700	1658600	3308800	2312200	2353900	1859700	2523900	2726400	16172	1386600	1445500	1716200
A0A0C4DH31;P23083	A0A0C4DH31;P23083	1;1	1;1	1;1	Ig heavy chain V-I region V35	IGHV1-18	sp|A0A0C4DH31|HV118_HUMAN Immunoglobulin heavy variable 1-18 OS=Homo sapiens GN=IGHV1-18 PE=3 SV=1;sp|P23083|HV102_HUMAN Immunoglobulin heavy variable 1-2 OS=Homo sapiens GN=IGHV1-2 PE=1 SV=2	2	1	1	1	1	1	1	1	1	1	1	1	1	1	1	1	9.4	9.4	9.4	12.82	117	117;117	0	4.3223	By MS/MS	By MS/MS	By MS/MS	By MS/MS	0	21644	16482	17830	109580	40746	42263	26334	35727	37147	0	20485	16896	19293
A0A0C4DH68	A0A0C4DH68	1	1	1		IGKV2-24	sp|A0A0C4DH68|KV224_HUMAN Immunoglobulin kappa variable 2-24 OS=Homo sapiens GN=IGKV2-24 PE=3 SV=1	1	1	1	1	1	0	0	0	1	0	0	0	1	0	0	0	10.8	10.8	10.8	13.079	120	120	0.0074074	1.1488	By MS/MS				0	0	0	0	0	0	0	0	0	0	0	0	0	0
A5YKK6	A5YKK6	9	9	9	CCR4-NOT transcription complex subunit 1	CNOT1	sp|A5YKK6|CNOT1_HUMAN CCR4-NOT transcription complex subunit 1 OS=Homo sapiens GN=CNOT1 PE=1 SV=2	1	9	9	9	9	9	8	6	9	9	8	6	9	9	8	6	3.7	3.7	3.7	266.94	2376	2376	0	14.095	By MS/MS	By MS/MS	By MS/MS	By MS/MS	847.81	122450	109420	122210	99019	92493	91126	75574	93028	92472	1180.1	114950	103420	125360
Q5TAQ9;A6NGE4;P0C7V8	Q5TAQ9;A6NGE4;P0C7V8	1;1;1	1;1;1	1;1;1	DDB1- and CUL4-associated factor 8;DDB1- and CUL4-associated factor 8-like protein 1;DDB1- and CUL4-associated factor 8-like protein 2	DCAF8;DCAF8L1;DCAF8L2	sp|Q5TAQ9|DCAF8_HUMAN DDB1- and CUL4-associated factor 8 OS=Homo sapiens GN=DCAF8 PE=1 SV=1;sp|A6NGE4|DC8L1_HUMAN DDB1- and CUL4-associated factor 8-like protein 1 OS=Homo sapiens GN=DCAF8L1 PE=2 SV=1;sp|P0C7V8|DC8L2_HUMAN DDB1- and CUL4-associated factor	3	1	1	1	1	1	1	1	1	1	1	1	1	1	1	1	1.5	1.5	1.5	66.851	597	597;600;631	0.0074257	1.1498	By matching	By matching	By MS/MS	By matching	69.23	15877	13235	13522	29407	17780	21676	12273	14669	24222	163.14	14938	12751	14239
A6NHL2	A6NHL2	4	1	1	Tubulin alpha chain-like 3	TUBAL3	sp|A6NHL2|TBAL3_HUMAN Tubulin alpha chain-like 3 OS=Homo sapiens GN=TUBAL3 PE=1 SV=2	1	4	1	1	3	4	2	4	0	1	0	1	0	1	0	1	10.3	3.8	3.8	49.908	446	446	0.0075094	1.1759	By matching	By matching	By matching	By MS/MS	0	10196	8592.6	9106.8	8751.1	8525.4	8405.5	6925.3	14358	10539	0	9573.6	8130.5	9461.4
P62308;A8MWD9	P62308;A8MWD9	2;2	2;2	2;2	Small nuclear ribonucleoprotein G;Putative small nuclear ribonucleoprotein G-like protein 15	SNRPG;SNRPGP15	sp|P62308|RUXG_HUMAN Small nuclear ribonucleoprotein G OS=Homo sapiens GN=SNRPG PE=1 SV=1;sp|A8MWD9|RUXGL_HUMAN Putative small nuclear ribonucleoprotein G-like protein 15 OS=Homo sapiens GN=SNRPGP15 PE=5 SV=2	2	2	2	2	1	2	1	2	1	2	1	2	1	2	1	2	26.3	26.3	26.3	8.496	76	76;76	0	3.3471	By MS/MS	By MS/MS	By matching	By MS/MS	142.46	41934	34080	35298	29868	31598	29376	23822	40940	35982	183.65	39340	32190	36804
Q99613;B5ME19	Q99613;B5ME19	7;7	7;7	7;7	Eukaryotic translation initiation factor 3 subunit C;Eukaryotic translation initiation factor 3 subunit C-like protein	EIF3C;EIF3CL	sp|Q99613|EIF3C_HUMAN Eukaryotic translation initiation factor 3 subunit C OS=Homo sapiens GN=EIF3C PE=1 SV=1;sp|B5ME19|EIFCL_HUMAN Eukaryotic translation initiation factor 3 subunit C-like protein OS=Homo sapiens GN=EIF3CL PE=3 SV=1	2	7	7	7	0	5	1	5	0	5	1	5	0	5	1	5	8.7	8.7	8.7	105.34	913	913;914	0	19.953		By MS/MS	By matching	By MS/MS	287.16	88260	90349	102780	88684	101540	90975	75609	122380	82498	555.59	83166	85464	105030
H7BZ55	H7BZ55	1	1	1	Putative ciliary rootlet coiled-coil protein-like 3 protein		sp|H7BZ55|CRCC2_HUMAN Putative ciliary rootlet coiled-coil protein 2 OS=Homo sapiens GN=CROCC2 PE=5 SV=3	1	1	1	1	1	1	0	0	1	1	0	0	1	1	0	0	0.4	0.4	0.4	185.87	1655	1655	0	1.8336	By matching	By MS/MS			0	16242	16108	11640	3670.8	5322.9	3851	3903.8	5871.9	2140.3	0	15178	15064	12170
O00159	O00159	4	4	4	Unconventional myosin-Ic	MYO1C	sp|O00159|MYO1C_HUMAN Unconventional myosin-Ic OS=Homo sapiens GN=MYO1C PE=1 SV=4	1	4	4	4	3	4	3	4	3	4	3	4	3	4	3	4	4	4	4	121.68	1063	1063	0	16.506	By matching	By MS/MS	By matching	By MS/MS	293.82	60378	63317	68241	58438	67647	64871	63484	105540	77914	592.63	56872	59848	69868
O00165	O00165	2	2	2	HCLS1-associated protein X-1	HAX1	sp|O00165|HAX1_HUMAN HCLS1-associated protein X-1 OS=Homo sapiens GN=HAX1 PE=1 SV=2	1	2	2	2	1	1	2	0	1	1	2	0	1	1	2	0	6.5	6.5	6.5	31.62	279	279	0	2.2466	By matching	By matching	By MS/MS		0	12897	8777.7	11906	21826	13283	17904	9900.6	10751	18736	0	12129	8486.3	12396
O00217	O00217	1	1	1	NADH dehydrogenase [ubiquinone] iron-sulfur protein 8, mitochondrial	NDUFS8	sp|O00217|NDUS8_HUMAN NADH dehydrogenase [ubiquinone] iron-sulfur protein 8, mitochondrial OS=Homo sapiens GN=NDUFS8 PE=1 SV=1	1	1	1	1	1	1	0	1	1	1	0	1	1	1	0	1	3.8	3.8	3.8	23.705	210	210	0	1.7356	By MS/MS	By MS/MS		By MS/MS	116.48	11779	8526.5	10613	9913.4	11637	9277.9	8438.8	10911	13152	140.66	11074	8093.3	11065
O00231	O00231	3	3	3	26S proteasome non-ATPase regulatory subunit 11	PSMD11	sp|O00231|PSD11_HUMAN 26S proteasome non-ATPase regulatory subunit 11 OS=Homo sapiens GN=PSMD11 PE=1 SV=3	1	3	3	3	0	3	0	3	0	3	0	3	0	3	0	3	9.7	9.7	9.7	47.463	422	422	0	10.811		By MS/MS		By MS/MS	216.21	38768	37606	40400	32240	35129	31110	30023	47684	39759	246.43	36442	35514	41444
O00232	O00232	1	1	1	26S proteasome non-ATPase regulatory subunit 12	PSMD12	sp|O00232|PSD12_HUMAN 26S proteasome non-ATPase regulatory subunit 12 OS=Homo sapiens GN=PSMD12 PE=1 SV=3	1	1	1	1	1	1	1	1	1	1	1	1	1	1	1	1	1.5	1.5	1.5	52.904	456	456	0	1.9236	By matching	By MS/MS	By MS/MS	By MS/MS	0	6217.5	5147.4	6979.9	5591.3	4980.1	5969.1	4868	5111.4	5017.5	0	5841.5	4875.5	7096.9
O00264	O00264	5	5	4	Membrane-associated progesterone receptor component 1	PGRMC1	sp|O00264|PGRC1_HUMAN Membrane-associated progesterone receptor component 1 OS=Homo sapiens GN=PGRMC1 PE=1 SV=3	1	5	5	4	5	5	4	5	5	5	4	5	4	4	3	4	21	21	16.4	21.671	195	195	0	28.029	By MS/MS	By MS/MS	By MS/MS	By MS/MS	1827.1	216480	157970	170810	261050	195130	204920	154800	180910	259050	2610.4	203280	151000	180200
O00268;Q92750	O00268	8;1	8;1	8;1	Transcription initiation factor TFIID subunit 4	TAF4	sp|O00268|TAF4_HUMAN Transcription initiation factor TFIID subunit 4 OS=Homo sapiens GN=TAF4 PE=1 SV=2	2	8	8	8	1	7	4	5	1	7	4	5	1	7	4	5	7.7	7.7	7.7	110.11	1085	1085;862	0	23.548	By matching	By MS/MS	By matching	By MS/MS	210.81	85850	83150	88745	75317	91223	77562	65371	107550	69375	434.94	80797	78563	91466
O00303	O00303	4	4	4	Eukaryotic translation initiation factor 3 subunit F	EIF3F	sp|O00303|EIF3F_HUMAN Eukaryotic translation initiation factor 3 subunit F OS=Homo sapiens GN=EIF3F PE=1 SV=1	1	4	4	4	2	4	1	4	2	4	1	4	2	4	1	4	13.7	13.7	13.7	37.563	357	357	0	13.135	By matching	By MS/MS	By matching	By MS/MS	0	50965	36093	41390	33882	42661	38398	31065	51834	38443	0	47838	34112	43434
O00410	O00410	9	9	9	Importin-5	IPO5	sp|O00410|IPO5_HUMAN Importin-5 OS=Homo sapiens GN=IPO5 PE=1 SV=4	1	9	9	9	3	7	3	8	3	7	3	8	3	7	3	8	12.2	12.2	12.2	123.63	1097	1097	0	30.291	By MS/MS	By MS/MS	By MS/MS	By MS/MS	90.369	60111	54820	66647	61695	61138	58029	46572	76608	66776	105.12	56570	51960	68184
O00422	O00422	10	10	10	Histone deacetylase complex subunit SAP18	SAP18	sp|O00422|SAP18_HUMAN Histone deacetylase complex subunit SAP18 OS=Homo sapiens GN=SAP18 PE=1 SV=1	1	10	10	10	4	10	3	8	4	10	3	8	4	10	3	8	60.1	60.1	60.1	17.561	153	153	0	22.978	By MS/MS	By MS/MS	By matching	By MS/MS	526.86	190160	178070	201710	144790	186290	175730	145140	225130	185920	1143.3	178870	168020	206970
O00425	O00425	10	9	9	Insulin-like growth factor 2 mRNA-binding protein 3	IGF2BP3	sp|O00425|IF2B3_HUMAN Insulin-like growth factor 2 mRNA-binding protein 3 OS=Homo sapiens GN=IGF2BP3 PE=1 SV=2	1	10	9	9	0	10	1	7	0	9	1	6	0	9	1	6	21.8	19.5	19.5	63.704	579	579	0	27.112		By MS/MS	By matching	By MS/MS	259.64	92066	87598	91584	76058	85160	82129	56718	95186	68892	495.7	86540	82721	94395
O00487	O00487	2	2	2	26S proteasome non-ATPase regulatory subunit 14	PSMD14	sp|O00487|PSDE_HUMAN 26S proteasome non-ATPase regulatory subunit 14 OS=Homo sapiens GN=PSMD14 PE=1 SV=1	1	2	2	2	0	1	0	1	0	1	0	1	0	1	0	1	15.2	15.2	15.2	34.577	310	310	0	7.1796		By MS/MS		By MS/MS	0	1367	1491.1	1531.9	1236.1	1286.3	1386.9	1334.3	2303.6	2200.6	0	1285.8	1407	1562.9
O15523;O00571	O15523;O00571	2;2	2;2	2;2	ATP-dependent RNA helicase DDX3Y;ATP-dependent RNA helicase DDX3X	DDX3Y;DDX3X	sp|O15523|DDX3Y_HUMAN ATP-dependent RNA helicase DDX3Y OS=Homo sapiens GN=DDX3Y PE=1 SV=2;sp|O00571|DDX3X_HUMAN ATP-dependent RNA helicase DDX3X OS=Homo sapiens GN=DDX3X PE=1 SV=3	2	2	2	2	1	1	0	2	1	1	0	2	1	1	0	2	2.9	2.9	2.9	73.153	660	660;662	0	4.4603	By matching	By MS/MS		By MS/MS	144.46	28358	19967	31126	20065	21298	19459	15731	27191	24241	283.37	26630	18899	31668
O14561	O14561	1	1	1	Acyl carrier protein, mitochondrial	NDUFAB1	sp|O14561|ACPM_HUMAN Acyl carrier protein, mitochondrial OS=Homo sapiens GN=NDUFAB1 PE=1 SV=3	1	1	1	1	1	1	1	1	1	1	1	1	1	1	1	1	5.8	5.8	5.8	17.417	156	156	0.0040431	1.5518	By matching	By MS/MS	By matching	By MS/MS	84.735	22031	36335	37249	24121	31314	27169	19623	32359	22653	349.8	20847	34207	37214
O14579	O14579	1	1	1	Coatomer subunit epsilon	COPE	sp|O14579|COPE_HUMAN Coatomer subunit epsilon OS=Homo sapiens GN=COPE PE=1 SV=3	1	1	1	1	0	1	1	1	0	1	1	1	0	1	1	1	5.5	5.5	5.5	34.482	308	308	0	5.5842		By matching	By MS/MS	By MS/MS	0	10516	7852.5	10012	10088	9094	9020.3	7249.8	16354	11309	0	9878.5	7459.6	10346
O14654	O14654	4	4	4	Insulin receptor substrate 4	IRS4	sp|O14654|IRS4_HUMAN Insulin receptor substrate 4 OS=Homo sapiens GN=IRS4 PE=1 SV=1	1	4	4	4	3	3	3	3	3	3	3	3	3	3	3	3	3.3	3.3	3.3	133.77	1257	1257	0	17.358	By MS/MS	By MS/MS	By MS/MS	By MS/MS	1357.2	91043	68740	77548	73144	77017	72194	63432	85335	83776	1414.9	85476	65181	80985
O14744	O14744	47	47	47	Protein arginine N-methyltransferase 5;Protein arginine N-methyltransferase 5, N-terminally processed	PRMT5	sp|O14744|ANM5_HUMAN Protein arginine N-methyltransferase 5 OS=Homo sapiens GN=PRMT5 PE=1 SV=4	1	47	47	47	36	45	40	47	36	45	40	47	36	45	40	47	73.5	73.5	73.5	72.683	637	637	0	323.31	By MS/MS	By MS/MS	By MS/MS	By MS/MS	10368	3900000	4105400	4390800	4391000	3990700	4261700	3156700	4294700	4248900	27135	3670700	3888300	4486700
P19105;O14950;P24844	P19105;O14950;P24844	8;8;5	8;8;5	8;8;5	Myosin regulatory light chain 12A;Myosin regulatory light chain 12B;Myosin regulatory light polypeptide 9	MYL12A;MYL12B;MYL9	sp|P19105|ML12A_HUMAN Myosin regulatory light chain 12A OS=Homo sapiens GN=MYL12A PE=1 SV=2;sp|O14950|ML12B_HUMAN Myosin regulatory light chain 12B OS=Homo sapiens GN=MYL12B PE=1 SV=2;sp|P24844|MYL9_HUMAN Myosin regulatory light polypeptide 9 OS=Homo sapie	3	8	8	8	7	6	6	6	7	6	6	6	7	6	6	6	60.2	60.2	60.2	19.794	171	171;172;172	0	32.189	By MS/MS	By MS/MS	By MS/MS	By MS/MS	1118	237070	177900	215220	584680	301420	256710	236280	275260	262460	1613.3	223380	174070	226030
O14980	O14980	12	12	12	Exportin-1	XPO1	sp|O14980|XPO1_HUMAN Exportin-1 OS=Homo sapiens GN=XPO1 PE=1 SV=1	1	12	12	12	3	8	6	9	3	8	6	9	3	8	6	9	15.1	15.1	15.1	123.38	1071	1071	0	41.525	By matching	By MS/MS	By MS/MS	By MS/MS	233.9	127010	121440	134570	134140	117370	124940	87113	156770	135680	497.88	119420	115070	137910
O15020	O15020	5	2	2	Spectrin beta chain, non-erythrocytic 2	SPTBN2	sp|O15020|SPTN2_HUMAN Spectrin beta chain, non-erythrocytic 2 OS=Homo sapiens GN=SPTBN2 PE=1 SV=3	1	5	2	2	3	5	4	5	2	2	2	2	2	2	2	2	1.7	0.6	0.6	271.32	2390	2390	0.0039526	1.3865	By MS/MS	By MS/MS	By MS/MS	By MS/MS	114.38	26574	26201	27825	24505	42208	35858	25944	42986	30687	218.93	25115	24770	29021
O15042	O15042	16	16	16	U2 snRNP-associated SURP motif-containing protein	U2SURP	sp|O15042|SR140_HUMAN U2 snRNP-associated SURP motif-containing protein OS=Homo sapiens GN=U2SURP PE=1 SV=2	1	16	16	16	2	14	1	16	2	14	1	16	2	14	1	16	14.4	14.4	14.4	118.29	1029	1029	0	35.801	By matching	By MS/MS	By matching	By MS/MS	702.4	259130	282950	305350	308210	397210	324150	262500	390480	283610	1473.5	244930	268070	314400
O15127	O15127	1	1	1	Secretory carrier-associated membrane protein 2	SCAMP2	sp|O15127|SCAM2_HUMAN Secretory carrier-associated membrane protein 2 OS=Homo sapiens GN=SCAMP2 PE=1 SV=2	1	1	1	1	1	1	0	1	1	1	0	1	1	1	0	1	3.6	3.6	3.6	36.648	329	329	0	3.0993	By matching	By MS/MS		By matching	0	4934.4	6685.7	7455.9	6759.8	8174.8	7256.9	5406.7	6968.3	4203.4	0	4674.6	6325.5	7537.4
O15173	O15173	3	2	2	Membrane-associated progesterone receptor component 2	PGRMC2	sp|O15173|PGRC2_HUMAN Membrane-associated progesterone receptor component 2 OS=Homo sapiens GN=PGRMC2 PE=1 SV=1	1	3	2	2	1	3	1	3	0	2	0	2	0	2	0	2	19.3	15.2	15.2	23.818	223	223	0	11.01	By matching	By MS/MS	By matching	By MS/MS	0	12072	10746	11615	8631.7	10144	9316.6	7146.4	11912	8694.3	0	11338	10136	11981
O15234	O15234	3	3	3	Protein CASC3	CASC3	sp|O15234|CASC3_HUMAN Protein CASC3 OS=Homo sapiens GN=CASC3 PE=1 SV=2	1	3	3	3	2	3	1	3	2	3	1	3	2	3	1	3	5.3	5.3	5.3	76.277	703	703	0	37.186	By matching	By MS/MS	By matching	By MS/MS	5.4977	48187	51519	54058	40795	48135	43878	39740	58799	46713	193.2	45344	48586	55225
O15260	O15260	1	1	1	Surfeit locus protein 4	SURF4	sp|O15260|SURF4_HUMAN Surfeit locus protein 4 OS=Homo sapiens GN=SURF4 PE=1 SV=3	1	1	1	1	1	1	1	1	1	1	1	1	1	1	1	1	3	3	3	30.394	269	269	0.0039474	1.3851	By MS/MS	By matching	By MS/MS	By matching	0	8915.3	6481.5	8498.7	11589	10742	11154	8128.8	7358.3	14711	0	8397.4	6202.8	8862.5
O15294	O15294	25	25	25	UDP-N-acetylglucosamine--peptide N-acetylglucosaminyltransferase 110 kDa subunit	OGT	sp|O15294|OGT1_HUMAN UDP-N-acetylglucosamine--peptide N-acetylglucosaminyltransferase 110 kDa subunit OS=Homo sapiens GN=OGT PE=1 SV=3	1	25	25	25	18	22	15	17	18	22	15	17	18	22	15	17	30.6	30.6	30.6	116.92	1046	1046	0	154.23	By MS/MS	By MS/MS	By MS/MS	By MS/MS	2128.1	519990	488720	539240	500780	480770	483230	363090	469030	513840	3761.5	488860	462640	553680
O15371	O15371	2	2	2	Eukaryotic translation initiation factor 3 subunit D	EIF3D	sp|O15371|EIF3D_HUMAN Eukaryotic translation initiation factor 3 subunit D OS=Homo sapiens GN=EIF3D PE=1 SV=1	1	2	2	2	0	2	0	2	0	2	0	2	0	2	0	2	3.8	3.8	3.8	63.972	548	548	0	2.9435		By MS/MS		By matching	93.198	12152	13322	15682	13449	16814	15424	12588	18589	10241	165.95	11477	12611	15968
O15372	O15372	3	3	3	Eukaryotic translation initiation factor 3 subunit H	EIF3H	sp|O15372|EIF3H_HUMAN Eukaryotic translation initiation factor 3 subunit H OS=Homo sapiens GN=EIF3H PE=1 SV=1	1	3	3	3	1	3	2	2	1	3	2	2	1	3	2	2	10.5	10.5	10.5	39.93	352	352	0	24.52	By MS/MS	By MS/MS	By matching	By MS/MS	127.89	41826	38575	46724	40484	45629	41958	35648	58402	50403	326.88	39386	36527	47854
O15397	O15397	30	30	29	Importin-8	IPO8	sp|O15397|IPO8_HUMAN Importin-8 OS=Homo sapiens GN=IPO8 PE=1 SV=2	1	30	30	29	25	28	23	30	25	28	23	30	24	27	22	29	32	32	31.1	119.94	1037	1037	0	299.98	By MS/MS	By MS/MS	By MS/MS	By MS/MS	2286	953600	875780	957860	1116100	940110	937490	739090	1002700	1079500	4938.3	896830	831990	987930
O15499	O15499	1	1	1	Homeobox protein goosecoid-2	GSC2	sp|O15499|GSC2_HUMAN Homeobox protein goosecoid-2 OS=Homo sapiens GN=GSC2 PE=2 SV=1	1	1	1	1	1	1	0	0	1	1	0	0	1	1	0	0	5.4	5.4	5.4	21.545	205	205	0	1.7981	By MS/MS	By MS/MS			0	2757.5	1075.7	2224.4	2314	2927.9	1870.6	2518.5	1834.7	3086.9	0	2592.9	1034.9	2352.7
O43143	O43143	16	16	16	Pre-mRNA-splicing factor ATP-dependent RNA helicase DHX15	DHX15	sp|O43143|DHX15_HUMAN Pre-mRNA-splicing factor ATP-dependent RNA helicase DHX15 OS=Homo sapiens GN=DHX15 PE=1 SV=2	1	16	16	16	0	16	2	16	0	16	2	16	0	16	2	16	22	22	22	90.932	795	795	0	41.707		By MS/MS	By matching	By MS/MS	1069.9	337110	321770	357260	304960	353300	334070	261130	396630	318240	1999.2	317270	304220	367240
O43167	O43167	1	1	1	Zinc finger and BTB domain-containing protein 24	ZBTB24	sp|O43167|ZBT24_HUMAN Zinc finger and BTB domain-containing protein 24 OS=Homo sapiens GN=ZBTB24 PE=1 SV=2	1	1	1	1	0	1	0	1	0	1	0	1	0	1	0	1	1.9	1.9	1.9	78.281	697	697	0	2.3572		By MS/MS		By matching	0	3778	3313.5	4215.6	3840.3	4043.7	3875.1	3629	4264.4	3191.1	0	3557	3141.8	4315.9
O43175	O43175	14	14	14	D-3-phosphoglycerate dehydrogenase	PHGDH	sp|O43175|SERA_HUMAN D-3-phosphoglycerate dehydrogenase OS=Homo sapiens GN=PHGDH PE=1 SV=4	1	14	14	14	11	12	12	12	11	12	12	12	11	12	12	12	31.7	31.7	31.7	56.65	533	533	0	128.34	By MS/MS	By MS/MS	By MS/MS	By MS/MS	1519.9	561110	435850	548010	575460	534620	521800	389370	462540	580460	3051	527500	414360	566230
O43242	O43242	9	9	9	26S proteasome non-ATPase regulatory subunit 3	PSMD3	sp|O43242|PSMD3_HUMAN 26S proteasome non-ATPase regulatory subunit 3 OS=Homo sapiens GN=PSMD3 PE=1 SV=2	1	9	9	9	4	9	3	9	4	9	3	9	4	9	3	9	19.5	19.5	19.5	60.977	534	534	0	44.261	By MS/MS	By MS/MS	By matching	By MS/MS	347.04	100460	98189	110420	96994	117650	103750	94805	148600	124190	537.02	94657	92891	113470
O43318	O43318	7	7	7	Mitogen-activated protein kinase kinase kinase 7	MAP3K7	sp|O43318|M3K7_HUMAN Mitogen-activated protein kinase kinase kinase 7 OS=Homo sapiens GN=MAP3K7 PE=1 SV=1	1	7	7	7	2	7	4	6	2	7	4	6	2	7	4	6	12.9	12.9	12.9	67.195	606	606	0	16.126	By MS/MS	By MS/MS	By MS/MS	By MS/MS	77.833	92281	87027	87880	67270	90613	86933	49372	84947	70631	156.66	86766	82053	91096
O43324	O43324	1	1	1	Eukaryotic translation elongation factor 1 epsilon-1	EEF1E1	sp|O43324|MCA3_HUMAN Eukaryotic translation elongation factor 1 epsilon-1 OS=Homo sapiens GN=EEF1E1 PE=1 SV=1	1	1	1	1	1	1	1	1	1	1	1	1	1	1	1	1	6.3	6.3	6.3	19.81	174	174	0	4.6679	By MS/MS	By matching	By MS/MS	By MS/MS	136.56	21573	20155	23309	38741	21817	24888	21597	28162	29377	182.88	20299	19336	23897
O43402	O43402	1	1	1	ER membrane protein complex subunit 8	EMC8	sp|O43402|EMC8_HUMAN ER membrane protein complex subunit 8 OS=Homo sapiens GN=EMC8 PE=1 SV=1	1	1	1	1	1	1	1	1	1	1	1	1	1	1	1	1	5.7	5.7	5.7	23.773	210	210	0	2.8066	By matching	By matching	By MS/MS	By matching	0	12110	13413	13658	20660	17209	21873	13987	15061	21634	0	11434	12789	14085
O43491;Q9Y2J2	O43491;Q9Y2J2	1;1	1;1	1;1	Band 4.1-like protein 2;Band 4.1-like protein 3;Band 4.1-like protein 3, N-terminally processed	EPB41L2;EPB41L3	sp|O43491|E41L2_HUMAN Band 4.1-like protein 2 OS=Homo sapiens GN=EPB41L2 PE=1 SV=1;sp|Q9Y2J2|E41L3_HUMAN Band 4.1-like protein 3 OS=Homo sapiens GN=EPB41L3 PE=1 SV=2	2	1	1	1	0	1	0	1	0	1	0	1	0	1	0	1	0.7	0.7	0.7	112.59	1005	1005;1087	0.0051216	1.2757		By matching		By MS/MS	98.812	23078	18471	20991	13892	16845	14751	11055	24481	22180	229.71	21651	17415	21703
O43592	O43592	1	1	1	Exportin-T	XPOT	sp|O43592|XPOT_HUMAN Exportin-T OS=Homo sapiens GN=XPOT PE=1 SV=2	1	1	1	1	1	1	1	1	1	1	1	1	1	1	1	1	1.6	1.6	1.6	109.96	962	962	0	7.4399	By matching	By MS/MS	By matching	By MS/MS	0	6458.1	6951.4	8277	6702.4	7265.2	8546.4	6198.9	11452	6857.3	0	6087	6572.4	8387.8
O43593	O43593	1	1	1	Lysine-specific demethylase hairless	HR	sp|O43593|HAIR_HUMAN Lysine-specific demethylase hairless OS=Homo sapiens GN=HR PE=1 SV=5	1	1	1	1	0	0	0	1	0	0	0	1	0	0	0	1	0.6	0.6	0.6	127.49	1189	1189	0.0013812	1.698				By MS/MS	16.418	20543	17654	19199	26474	28332	26672	1019.2	1058.8	1096.7	146.91	19375	16825	20159
O43615	O43615	1	1	1	Mitochondrial import inner membrane translocase subunit TIM44	TIMM44	sp|O43615|TIM44_HUMAN Mitochondrial import inner membrane translocase subunit TIM44 OS=Homo sapiens GN=TIMM44 PE=1 SV=2	1	1	1	1	0	1	0	1	0	1	0	1	0	1	0	1	2.9	2.9	2.9	51.355	452	452	0	3.9289		By MS/MS		By MS/MS	0	7707	6991.5	7083.7	6369.2	6245.5	6770.4	4591.8	8560.9	6413.2	0	7235.6	6605.1	7333.3
O43663	O43663	1	1	1	Protein regulator of cytokinesis 1	PRC1	sp|O43663|PRC1_HUMAN Protein regulator of cytokinesis 1 OS=Homo sapiens GN=PRC1 PE=1 SV=2	1	1	1	1	0	1	1	1	0	1	1	1	0	1	1	1	1.1	1.1	1.1	71.606	620	620	0.0074442	1.1625		By matching	By matching	By MS/MS	0	29098	19929	22760	16739	18851	15257	10228	23443	18555	0	27269	18807	23836
O43681	O43681	1	1	1	ATPase ASNA1	ASNA1	sp|O43681|ASNA_HUMAN ATPase ASNA1 OS=Homo sapiens GN=ASNA1 PE=1 SV=2	1	1	1	1	0	1	0	1	0	1	0	1	0	1	0	1	2.6	2.6	2.6	38.792	348	348	0.0085679	1.1256		By MS/MS		By matching	0	2670.6	2651.3	3037.2	3186.6	3286.3	3393.1	2639.7	3292	2473.1	0	2517.8	2515.5	3115.8
O43795	O43795	9	9	8	Unconventional myosin-Ib	MYO1B	sp|O43795|MYO1B_HUMAN Unconventional myosin-Ib OS=Homo sapiens GN=MYO1B PE=1 SV=3	1	9	9	8	7	8	7	9	7	8	7	9	6	7	6	8	8.5	8.5	7.7	131.98	1136	1136	0	23.488	By MS/MS	By MS/MS	By MS/MS	By MS/MS	741.11	195420	176250	219930	262660	259550	231390	217180	266400	287780	1170.9	184370	167990	226350
O43808	O43808	1	1	1	Peroxisomal membrane protein PMP34	SLC25A17	sp|O43808|PM34_HUMAN Peroxisomal membrane protein PMP34 OS=Homo sapiens GN=SLC25A17 PE=1 SV=1	1	1	1	1	0	0	0	1	0	0	0	1	0	0	0	1	4.6	4.6	4.6	34.566	307	307	0.0027322	1.6254				By MS/MS	0	0	0	0	0	0	0	0	0	0	0	0	0	0
O60664	O60664	1	1	1	Perilipin-3	PLIN3	sp|O60664|PLIN3_HUMAN Perilipin-3 OS=Homo sapiens GN=PLIN3 PE=1 SV=3	1	1	1	1	1	0	0	0	1	0	0	0	1	0	0	0	3.7	3.7	3.7	47.074	434	434	0.0074627	1.1658	By MS/MS				0	0	0	0	0	0	0	0	0	0	0	0	0	0
O60762	O60762	2	2	2	Dolichol-phosphate mannosyltransferase subunit 1	DPM1	sp|O60762|DPM1_HUMAN Dolichol-phosphate mannosyltransferase subunit 1 OS=Homo sapiens GN=DPM1 PE=1 SV=1	1	2	2	2	1	2	0	2	1	2	0	2	1	2	0	2	7.7	7.7	7.7	29.634	260	260	0	2.3179	By matching	By MS/MS		By MS/MS	109.97	24944	24145	26360	21904	22106	22641	19144	35209	24541	119.99	23446	22816	26994
Q99879;Q99877;Q93079;Q5QNW6;P62807;P58876;O60814;Q99880;P57053;Q96A08	Q99879;Q99877;Q93079;Q5QNW6;P62807;P58876;O60814;Q99880;P57053	8;8;8;8;8;8;8;7;7;3	8;8;8;8;8;8;8;7;7;3	2;2;2;2;2;2;2;2;2;0	Histone H2B type 1-M;Histone H2B type 1-N;Histone H2B type 1-H;Histone H2B type 2-F;Histone H2B type 1-C/E/F/G/I;Histone H2B type 1-D;Histone H2B type 1-K;Histone H2B type 1-L;Histone H2B type F-S	HIST1H2BM;HIST1H2BN;HIST1H2BH;HIST2H2BF;HIST1H2BC;HIST1H2BD;HIST1H2BK;HIST1H2BL;H2BFS	sp|Q99879|H2B1M_HUMAN Histone H2B type 1-M OS=Homo sapiens GN=HIST1H2BM PE=1 SV=3;sp|Q99877|H2B1N_HUMAN Histone H2B type 1-N OS=Homo sapiens GN=HIST1H2BN PE=1 SV=3;sp|Q93079|H2B1H_HUMAN Histone H2B type 1-H OS=Homo sapiens GN=HIST1H2BH PE=1 SV=3;sp|Q5QNW6|	10	8	8	2	8	7	7	7	8	7	7	7	2	1	2	1	52.4	52.4	7.9	13.989	126	126;126;126;126;126;126;126;126;126;127	0	13.44	By MS/MS	By MS/MS	By MS/MS	By MS/MS	19078	201930	144940	169130	208780	315540	184500	158210	165740	192800	18844	190650	139320	180850
O60825	O60825	11	7	7	6-phosphofructo-2-kinase/fructose-2,6-bisphosphatase 2;6-phosphofructo-2-kinase;Fructose-2,6-bisphosphatase	PFKFB2	sp|O60825|F262_HUMAN 6-phosphofructo-2-kinase/fructose-2,6-bisphosphatase 2 OS=Homo sapiens GN=PFKFB2 PE=1 SV=2	1	11	7	7	2	10	4	9	1	6	2	5	1	6	2	5	24.6	17.4	17.4	58.476	505	505	0	18.714	By matching	By MS/MS	By matching	By MS/MS	152.68	71791	81625	90678	82063	95985	92287	68685	97703	66252	250.94	67774	77232	92408
O60884	O60884	6	6	6	DnaJ homolog subfamily A member 2	DNAJA2	sp|O60884|DNJA2_HUMAN DnaJ homolog subfamily A member 2 OS=Homo sapiens GN=DNAJA2 PE=1 SV=1	1	6	6	6	6	6	6	5	6	6	6	5	6	6	6	5	18.4	18.4	18.4	45.745	412	412	0	29.586	By matching	By MS/MS	By MS/MS	By MS/MS	284.53	120360	109820	126050	127940	118930	133340	92657	140010	130030	575.56	113210	104160	129510
O75122	O75122	10	10	10	CLIP-associating protein 2	CLASP2	sp|O75122|CLAP2_HUMAN CLIP-associating protein 2 OS=Homo sapiens GN=CLASP2 PE=1 SV=2	1	10	10	10	6	8	4	8	6	8	4	8	6	8	4	8	8.7	8.7	8.7	141.13	1294	1294	0	27.108	By MS/MS	By MS/MS	By MS/MS	By MS/MS	572.12	146890	149880	171780	131420	154390	141510	108190	172880	141470	1443.4	138300	141560	175080
O75143	O75143	4	4	4	Autophagy-related protein 13	ATG13	sp|O75143|ATG13_HUMAN Autophagy-related protein 13 OS=Homo sapiens GN=ATG13 PE=1 SV=1	1	4	4	4	0	4	0	4	0	4	0	4	0	4	0	4	9.1	9.1	9.1	56.571	517	517	0	7.8322		By MS/MS		By MS/MS	197.48	39532	38901	41080	44044	54332	44912	37173	56554	41258	228.28	37298	36884	42651
O75182	O75182	1	1	1	Paired amphipathic helix protein Sin3b	SIN3B	sp|O75182|SIN3B_HUMAN Paired amphipathic helix protein Sin3b OS=Homo sapiens GN=SIN3B PE=1 SV=2	1	1	1	1	1	1	1	1	1	1	1	1	1	1	1	1	0.6	0.6	0.6	133.06	1162	1162	0.0052016	1.3332	By MS/MS	By MS/MS	By MS/MS	By MS/MS	159.03	20233	16456	17300	27863	29964	26024	20553	36869	22168	217.8	19092	15737	18407
Q8WWF6;O75190	Q8WWF6;O75190	1;1	1;1	1;1	DnaJ homolog subfamily B member 3;DnaJ homolog subfamily B member 6	DNAJB3;DNAJB6	sp|Q8WWF6|DNJB3_HUMAN DnaJ homolog subfamily B member 3 OS=Homo sapiens GN=DNAJB3 PE=1 SV=1;sp|O75190|DNJB6_HUMAN DnaJ homolog subfamily B member 6 OS=Homo sapiens GN=DNAJB6 PE=1 SV=2	2	1	1	1	1	1	1	1	1	1	1	1	1	1	1	1	9	9	9	16.558	145	145;326	0	2.3999	By MS/MS	By matching	By matching	By MS/MS	171.17	20832	18008	21777	15931	20148	17042	18339	18432	23125	198.24	19592	17018	22368
O75306	O75306	2	2	2	NADH dehydrogenase [ubiquinone] iron-sulfur protein 2, mitochondrial	NDUFS2	sp|O75306|NDUS2_HUMAN NADH dehydrogenase [ubiquinone] iron-sulfur protein 2, mitochondrial OS=Homo sapiens GN=NDUFS2 PE=1 SV=2	1	2	2	2	0	2	0	2	0	2	0	2	0	2	0	2	4.5	4.5	4.5	52.545	463	463	0	4.1502		By matching		By MS/MS	0	11577	9890.1	10297	8001.8	8694.5	8160.8	6347.4	11280	9693.4	0	10862	9329.3	10676
O75352	O75352	1	1	1	Mannose-P-dolichol utilization defect 1 protein	MPDU1	sp|O75352|MPU1_HUMAN Mannose-P-dolichol utilization defect 1 protein OS=Homo sapiens GN=MPDU1 PE=1 SV=2	1	1	1	1	0	0	0	1	0	0	0	1	0	0	0	1	4	4	4	26.638	247	247	0.0027285	1.6251				By MS/MS	0	0	0	0	0	0	0	0	0	0	0	0	0	0
O75396	O75396	1	1	1	Vesicle-trafficking protein SEC22b	SEC22B	sp|O75396|SC22B_HUMAN Vesicle-trafficking protein SEC22b OS=Homo sapiens GN=SEC22B PE=1 SV=4	1	1	1	1	1	1	1	1	1	1	1	1	1	1	1	1	4.2	4.2	4.2	24.593	215	215	0	2.1001	By MS/MS	By MS/MS	By MS/MS	By MS/MS	127	34467	29352	32487	52859	41393	36976	32647	32308	41432	203.35	32462	28104	33914
O75400	O75400	3	3	3	Pre-mRNA-processing factor 40 homolog A	PRPF40A	sp|O75400|PR40A_HUMAN Pre-mRNA-processing factor 40 homolog A OS=Homo sapiens GN=PRPF40A PE=1 SV=2	1	3	3	3	0	3	0	2	0	3	0	2	0	3	0	2	2.7	2.7	2.7	108.8	957	957	0	3.394		By MS/MS		By MS/MS	0	27006	25187	27290	24062	30088	26982	22044	38245	25681	0	25424	23810	28224
O75489	O75489	3	3	3	NADH dehydrogenase [ubiquinone] iron-sulfur protein 3, mitochondrial	NDUFS3	sp|O75489|NDUS3_HUMAN NADH dehydrogenase [ubiquinone] iron-sulfur protein 3, mitochondrial OS=Homo sapiens GN=NDUFS3 PE=1 SV=1	1	3	3	3	1	2	1	3	1	2	1	3	1	2	1	3	15.2	15.2	15.2	30.241	264	264	0	13.195	By matching	By MS/MS	By matching	By MS/MS	0	56983	47142	50285	49621	55970	51547	38264	67026	48256	0	53563	44630	52532
O75494;Q8WXF0	O75494	7;2	7;2	7;2	Serine/arginine-rich splicing factor 10	SRSF10	sp|O75494|SRS10_HUMAN Serine/arginine-rich splicing factor 10 OS=Homo sapiens GN=SRSF10 PE=1 SV=1	2	7	7	7	1	6	1	7	1	6	1	7	1	6	1	7	22.9	22.9	22.9	31.3	262	262;261	0	61.227	By matching	By MS/MS	By matching	By MS/MS	0	142420	142150	139640	100600	113870	119830	98466	166260	113990	0	133730	133890	143640
O75533	O75533	32	32	32	Splicing factor 3B subunit 1	SF3B1	sp|O75533|SF3B1_HUMAN Splicing factor 3B subunit 1 OS=Homo sapiens GN=SF3B1 PE=1 SV=3	1	32	32	32	9	27	5	29	9	27	5	29	9	27	5	29	26.9	26.9	26.9	145.83	1304	1304	0	127.98	By matching	By MS/MS	By matching	By MS/MS	1729	531500	523170	557380	503740	578960	551210	388770	660340	515500	3364.1	500350	494650	574090
O75643	O75643	11	11	11	U5 small nuclear ribonucleoprotein 200 kDa helicase	SNRNP200	sp|O75643|U520_HUMAN U5 small nuclear ribonucleoprotein 200 kDa helicase OS=Homo sapiens GN=SNRNP200 PE=1 SV=2	1	11	11	11	6	11	3	10	6	11	3	10	6	11	3	10	6.5	6.5	6.5	244.5	2136	2136	0	42.179	By matching	By MS/MS	By matching	By MS/MS	662.29	129380	118940	130870	95529	104230	103070	85881	151220	115620	1009.4	121510	112240	134260
O75688;P35813	O75688	21;3	21;3	21;3	Protein phosphatase 1B	PPM1B	sp|O75688|PPM1B_HUMAN Protein phosphatase 1B OS=Homo sapiens GN=PPM1B PE=1 SV=1	2	21	21	21	17	20	18	20	17	20	18	20	17	20	18	20	53.2	53.2	53.2	52.642	479	479;382	0	231.94	By MS/MS	By MS/MS	By MS/MS	By MS/MS	2220	1072900	1039800	1146200	1319200	1249200	1194000	937880	1255300	1311600	5896.2	1010700	987680	1180700
O75821	O75821	1	1	1	Eukaryotic translation initiation factor 3 subunit G	EIF3G	sp|O75821|EIF3G_HUMAN Eukaryotic translation initiation factor 3 subunit G OS=Homo sapiens GN=EIF3G PE=1 SV=2	1	1	1	1	0	1	0	0	0	1	0	0	0	1	0	0	2.8	2.8	2.8	35.611	320	320	0	2.1023		By MS/MS			0	0	0	0	0	0	0	0	0	0	0	0	0	0
O75832	O75832	4	4	4	26S proteasome non-ATPase regulatory subunit 10	PSMD10	sp|O75832|PSD10_HUMAN 26S proteasome non-ATPase regulatory subunit 10 OS=Homo sapiens GN=PSMD10 PE=1 SV=1	1	4	4	4	3	3	1	4	3	3	1	4	3	3	1	4	15	15	15	24.428	226	226	0	3.9478	By MS/MS	By MS/MS	By MS/MS	By MS/MS	962.84	112750	95234	109280	82972	85681	87501	76192	96477	94158	1593.4	105830	89983	112410
O75844	O75844	1	1	1	CAAX prenyl protease 1 homolog	ZMPSTE24	sp|O75844|FACE1_HUMAN CAAX prenyl protease 1 homolog OS=Homo sapiens GN=ZMPSTE24 PE=1 SV=2	1	1	1	1	0	0	0	1	0	0	0	1	0	0	0	1	1.7	1.7	1.7	54.812	475	475	0.0074534	1.1627				By MS/MS	0	23512	20009	23723	20951	23695	20971	17821	34107	28489	0	22116	18941	24472
O75934	O75934	2	2	2	Pre-mRNA-splicing factor SPF27	BCAS2	sp|O75934|SPF27_HUMAN Pre-mRNA-splicing factor SPF27 OS=Homo sapiens GN=BCAS2 PE=1 SV=1	1	2	2	2	0	1	0	2	0	1	0	2	0	1	0	2	18.2	18.2	18.2	26.131	225	225	0	14.287		By MS/MS		By MS/MS	145.28	16070	14878	20123	11302	12384	14100	11055	18993	13843	195.29	15103	14034	20276
O75947	O75947	9	9	9	ATP synthase subunit d, mitochondrial	ATP5H	sp|O75947|ATP5H_HUMAN ATP synthase subunit d, mitochondrial OS=Homo sapiens GN=ATP5H PE=1 SV=3	1	9	9	9	7	9	9	7	7	9	9	7	7	9	9	7	62.1	62.1	62.1	18.491	161	161	0	33.649	By MS/MS	By MS/MS	By MS/MS	By MS/MS	1493.8	431730	424020	522270	446100	473740	504110	391460	445330	536620	3090	406720	401530	531390
O75964	O75964	2	2	2	ATP synthase subunit g, mitochondrial	ATP5L	sp|O75964|ATP5L_HUMAN ATP synthase subunit g, mitochondrial OS=Homo sapiens GN=ATP5L PE=1 SV=3	1	2	2	2	2	2	0	1	2	2	0	1	2	2	0	1	23.3	23.3	23.3	11.428	103	103	0	5.458	By matching	By MS/MS		By MS/MS	104.64	29755	28563	31611	24104	28081	26924	18860	36016	24378	152.3	27980	26965	32403
O94826	O94826	2	2	2	Mitochondrial import receptor subunit TOM70	TOMM70A	sp|O94826|TOM70_HUMAN Mitochondrial import receptor subunit TOM70 OS=Homo sapiens GN=TOMM70 PE=1 SV=1	1	2	2	2	0	1	2	2	0	1	2	2	0	1	2	2	3.1	3.1	3.1	67.454	608	608	0	4.021		By MS/MS	By matching	By MS/MS	176.85	28122	27795	33474	28077	31673	29668	24396	41759	33060	371.89	26497	26309	34126
O94832	O94832	2	2	2	Unconventional myosin-Id	MYO1D	sp|O94832|MYO1D_HUMAN Unconventional myosin-Id OS=Homo sapiens GN=MYO1D PE=1 SV=2	1	2	2	2	1	2	1	1	1	2	1	1	1	2	1	1	1.6	1.6	1.6	116.2	1006	1006	0	4.0486	By matching	By MS/MS	By matching	By matching	0	11226	12560	12881	21559	26738	24822	19357	28839	18336	0	10680	12007	13554
O95202	O95202	5	5	5	LETM1 and EF-hand domain-containing protein 1, mitochondrial	LETM1	sp|O95202|LETM1_HUMAN Mitochondrial proton/calcium exchanger protein OS=Homo sapiens GN=LETM1 PE=1 SV=1	1	5	5	5	2	3	2	3	2	3	2	3	2	3	2	3	7.3	7.3	7.3	83.353	739	739	0	10.116	By matching	By MS/MS	By MS/MS	By MS/MS	48.361	44568	37411	42182	58282	40285	41621	29326	49090	46209	149.32	41878	35686	43658
O95232	O95232	4	4	4	Luc7-like protein 3	LUC7L3	sp|O95232|LC7L3_HUMAN Luc7-like protein 3 OS=Homo sapiens GN=LUC7L3 PE=1 SV=2	1	4	4	4	1	3	0	3	1	3	0	3	1	3	0	3	7.2	7.2	7.2	51.466	432	432	0	5.2103	By matching	By MS/MS		By MS/MS	159.92	32398	34581	39516	31774	39097	32465	29718	44820	35967	309.21	30548	32684	40275
O95292	O95292	2	2	2	Vesicle-associated membrane protein-associated protein B/C	VAPB	sp|O95292|VAPB_HUMAN Vesicle-associated membrane protein-associated protein B/C OS=Homo sapiens GN=VAPB PE=1 SV=3	1	2	2	2	1	2	1	1	1	2	1	1	1	2	1	1	8.2	8.2	8.2	27.228	243	243	0	4.5581	By matching	By MS/MS	By matching	By matching	0	5376.8	9920.5	11255	9530.7	10897	10437	7076.4	10961	6482.2	0	5120.3	9379	11193
O95373	O95373	6	5	5	Importin-7	IPO7	sp|O95373|IPO7_HUMAN Importin-7 OS=Homo sapiens GN=IPO7 PE=1 SV=1	1	6	5	5	4	5	5	6	3	4	4	5	3	4	4	5	6.2	5.2	5.2	119.52	1038	1038	0	14.666	By MS/MS	By MS/MS	By MS/MS	By MS/MS	367.78	92226	80140	97451	136790	102790	97560	78953	89906	111200	595.02	86842	76629	100360
O95399	O95399	1	1	1	Urotensin-2	UTS2	sp|O95399|UTS2_HUMAN Urotensin-2 OS=Homo sapiens GN=UTS2 PE=1 SV=1	1	1	1	1	0	0	1	1	0	0	1	1	0	0	1	1	6.5	6.5	6.5	14.295	124	124	0.0040706	1.5888			By MS/MS	By MS/MS	0	19451	12751	13871	16273	15298	18573	11172	17091	18911	0	18243	12112	14750
O95721	O95721	3	3	3	Synaptosomal-associated protein 29	SNAP29	sp|O95721|SNP29_HUMAN Synaptosomal-associated protein 29 OS=Homo sapiens GN=SNAP29 PE=1 SV=1	1	3	3	3	3	2	1	1	3	2	1	1	3	2	1	1	11.6	11.6	11.6	28.97	258	258	0	8.5117	By MS/MS	By MS/MS	By matching	By matching	214	16169	22017	24312	16801	22708	19979	18268	20945	15356	346.22	15287	20769	24477
O95785	O95785	1	1	1	Protein Wiz	WIZ	sp|O95785|WIZ_HUMAN Protein Wiz OS=Homo sapiens GN=WIZ PE=1 SV=2	1	1	1	1	0	1	0	1	0	1	0	1	0	1	0	1	1.1	1.1	1.1	178.67	1651	1651	0	18.535		By MS/MS		By MS/MS	144.67	21753	22684	26606	23531	25842	25343	18311	31465	23771	229.67	20508	21480	27100
O95816	O95816	5	5	5	BAG family molecular chaperone regulator 2	BAG2	sp|O95816|BAG2_HUMAN BAG family molecular chaperone regulator 2 OS=Homo sapiens GN=BAG2 PE=1 SV=1	1	5	5	5	5	3	3	2	5	3	3	2	5	3	3	2	24.2	24.2	24.2	23.772	211	211	0	23.687	By MS/MS	By MS/MS	By MS/MS	By MS/MS	313.59	105680	93342	104610	83428	93321	93640	74179	91696	106970	580.65	99301	88182	107750
O95831	O95831	4	4	4	Apoptosis-inducing factor 1, mitochondrial	AIFM1	sp|O95831|AIFM1_HUMAN Apoptosis-inducing factor 1, mitochondrial OS=Homo sapiens GN=AIFM1 PE=1 SV=1	1	4	4	4	2	4	3	4	2	4	3	4	2	4	3	4	8.3	8.3	8.3	66.9	613	613	0	7.5763	By MS/MS	By MS/MS	By matching	By MS/MS	171.25	37190	34975	40118	30979	31775	31716	23594	41076	34606	254.39	34950	33042	40978
O96000	O96000	1	1	1	NADH dehydrogenase [ubiquinone] 1 beta subcomplex subunit 10	NDUFB10	sp|O96000|NDUBA_HUMAN NADH dehydrogenase [ubiquinone] 1 beta subcomplex subunit 10 OS=Homo sapiens GN=NDUFB10 PE=1 SV=3	1	1	1	1	1	1	1	1	1	1	1	1	1	1	1	1	8.1	8.1	8.1	20.776	172	172	0	3.572	By matching	By MS/MS	By matching	By matching	0	5312.9	4890.3	6037.7	5910.8	7022.8	8636.8	4927.6	7964	4094.7	0	5012.5	4640.3	6207.6
O96008	O96008	1	1	1	Mitochondrial import receptor subunit TOM40 homolog	TOMM40	sp|O96008|TOM40_HUMAN Mitochondrial import receptor subunit TOM40 homolog OS=Homo sapiens GN=TOMM40 PE=1 SV=1	1	1	1	1	0	1	0	1	0	1	0	1	0	1	0	1	3	3	3	37.893	361	361	0.0051546	1.2904		By MS/MS		By matching	0	5510.5	6349.1	7551	8156.8	8927.8	10040	6923.5	9525.7	5947.5	0	5216	6031.4	7687.3
P00167	P00167	4	4	4	Cytochrome b5	CYB5A	sp|P00167|CYB5_HUMAN Cytochrome b5 OS=Homo sapiens GN=CYB5A PE=1 SV=2	1	4	4	4	4	4	3	3	4	4	3	3	4	4	3	3	33.6	33.6	33.6	15.33	134	134	0	12.447	By MS/MS	By MS/MS	By MS/MS	By matching	152.62	45257	38678	48906	71142	56278	55562	48551	40839	74539	164.54	42662	37053	50423
P00338;Q6ZMR3;P07864	P00338	4;1;1	4;1;1	3;0;0	L-lactate dehydrogenase A chain	LDHA	sp|P00338|LDHA_HUMAN L-lactate dehydrogenase A chain OS=Homo sapiens GN=LDHA PE=1 SV=2	3	4	4	3	2	2	1	2	2	2	1	2	1	2	1	1	11.7	11.7	8.1	36.688	332	332;332;332	0	39.803	By MS/MS	By MS/MS	By matching	By MS/MS	284.64	94910	57153	59672	49090	54998	58497	42644	70311	58073	452.42	88839	53972	63957
P00387	P00387	3	3	3	NADH-cytochrome b5 reductase 3;NADH-cytochrome b5 reductase 3 membrane-bound form;NADH-cytochrome b5 reductase 3 soluble form	CYB5R3	sp|P00387|NB5R3_HUMAN NADH-cytochrome b5 reductase 3 OS=Homo sapiens GN=CYB5R3 PE=1 SV=3	1	3	3	3	2	3	2	3	2	3	2	3	2	3	2	3	15.6	15.6	15.6	34.234	301	301	0	17.311	By matching	By MS/MS	By matching	By MS/MS	279.21	38489	37613	42514	40975	45507	41700	30702	58085	44727	415.15	36268	35647	43680
P00403	P00403	2	2	2	Cytochrome c oxidase subunit 2	MT-CO2	sp|P00403|COX2_HUMAN Cytochrome c oxidase subunit 2 OS=Homo sapiens GN=MT-CO2 PE=1 SV=1	1	2	2	2	0	2	0	1	0	2	0	1	0	2	0	1	7.5	7.5	7.5	25.565	227	227	0	2.2318		By MS/MS		By MS/MS	190.15	30769	25727	27893	24167	31955	27061	21164	31350	21552	229.88	28938	24328	29104
P00846	P00846	2	2	2	ATP synthase subunit a	MT-ATP6	sp|P00846|ATP6_HUMAN ATP synthase subunit a OS=Homo sapiens GN=MT-ATP6 PE=1 SV=1	1	2	2	2	1	2	1	2	1	2	1	2	1	2	1	2	8.4	8.4	8.4	24.817	226	226	0	2.4031	By MS/MS	By MS/MS	By matching	By MS/MS	0	24861	18135	12537	19397	17537	16708	14940	23955	17267	0	23282	17173	13946
P01859	P01859	1	1	1	Ig gamma-2 chain C region	IGHG2	sp|P01859|IGHG2_HUMAN Immunoglobulin heavy constant gamma 2 OS=Homo sapiens GN=IGHG2 PE=1 SV=2	1	1	1	1	1	1	1	1	1	1	1	1	1	1	1	1	2.8	2.8	2.8	35.9	326	326	0	20.821	By MS/MS	By MS/MS	By matching	By MS/MS	71.159	77059	59203	69373	76243	122200	82739	91452	105930	122860	374.58	72786	56246	73577
P02786	P02786	6	6	6	Transferrin receptor protein 1;Transferrin receptor protein 1, serum form	TFRC	sp|P02786|TFR1_HUMAN Transferrin receptor protein 1 OS=Homo sapiens GN=TFRC PE=1 SV=2	1	6	6	6	4	6	4	6	4	6	4	6	4	6	4	6	8.9	8.9	8.9	84.87	760	760	0	16.708	By MS/MS	By MS/MS	By MS/MS	By MS/MS	448.29	93067	83650	97384	83433	88855	84750	69842	93565	89252	785.24	87520	79158	99986
P02788	P02788	3	1	1	Lactotransferrin;Lactoferricin-H;Kaliocin-1;Lactoferroxin-A;Lactoferroxin-B;Lactoferroxin-C	LTF	sp|P02788|TRFL_HUMAN Lactotransferrin OS=Homo sapiens GN=LTF PE=1 SV=6	1	3	1	1	0	0	0	3	0	0	0	1	0	0	0	1	4.2	1.3	1.3	78.181	710	710	0	2.2818				By MS/MS	0	0	0	0	0	0	0	0	0	0	0	0	0	0
P04075	P04075	3	3	3	Fructose-bisphosphate aldolase A	ALDOA	sp|P04075|ALDOA_HUMAN Fructose-bisphosphate aldolase A OS=Homo sapiens GN=ALDOA PE=1 SV=2	1	3	3	3	1	0	1	2	1	0	1	2	1	0	1	2	9.3	9.3	9.3	39.42	364	364	0	2.335	By MS/MS		By matching	By MS/MS	324.51	42379	26194	33314	25977	31030	28191	24904	33651	35930	445.76	39741	24798	34966
P04181	P04181	5	5	5	Ornithine aminotransferase, mitochondrial;Ornithine aminotransferase, hepatic form;Ornithine aminotransferase, renal form	OAT	sp|P04181|OAT_HUMAN Ornithine aminotransferase, mitochondrial OS=Homo sapiens GN=OAT PE=1 SV=1	1	5	5	5	1	4	2	3	1	4	2	3	1	4	2	3	14.6	14.6	14.6	48.534	439	439	0	14.875	By matching	By MS/MS	By matching	By MS/MS	0	38430	38704	42727	33199	35918	36111	25432	53512	27925	0	36143	36536	43616
P04259	P04259	26	1	1	Keratin, type II cytoskeletal 6B	KRT6B	sp|P04259|K2C6B_HUMAN Keratin, type II cytoskeletal 6B OS=Homo sapiens GN=KRT6B PE=1 SV=5	1	26	1	1	23	24	16	26	1	0	1	1	1	0	1	1	41	1.6	1.6	60.066	564	564	0.0040161	1.5094	By matching	By matching	By matching	By MS/MS	0	21489	16581	17540	22645	27549	25300	13649	28215	27443	0	20242	15770	18654
P04406	P04406	4	4	4	Glyceraldehyde-3-phosphate dehydrogenase	GAPDH	sp|P04406|G3P_HUMAN Glyceraldehyde-3-phosphate dehydrogenase OS=Homo sapiens GN=GAPDH PE=1 SV=3	1	4	4	4	3	3	3	3	3	3	3	3	3	3	3	3	13.1	13.1	13.1	36.053	335	335	0	7.3601	By MS/MS	By MS/MS	By MS/MS	By MS/MS	1549.4	170100	123740	126170	110330	116980	132270	88527	104500	103260	1982	159430	116980	133090
P04843	P04843	18	18	18	Dolichyl-diphosphooligosaccharide--protein glycosyltransferase subunit 1	RPN1	sp|P04843|RPN1_HUMAN Dolichyl-diphosphooligosaccharide--protein glycosyltransferase subunit 1 OS=Homo sapiens GN=RPN1 PE=1 SV=1	1	18	18	18	14	17	13	17	14	17	13	17	14	17	13	17	30.1	30.1	30.1	68.569	607	607	0	70.699	By MS/MS	By MS/MS	By MS/MS	By MS/MS	1587.8	548710	499300	569590	631980	622580	587680	481830	683190	650040	2775.8	516720	474290	587890
P04844	P04844	4	4	4	Dolichyl-diphosphooligosaccharide--protein glycosyltransferase subunit 2	RPN2	sp|P04844|RPN2_HUMAN Dolichyl-diphosphooligosaccharide--protein glycosyltransferase subunit 2 OS=Homo sapiens GN=RPN2 PE=1 SV=3	1	4	4	4	3	4	4	3	3	4	4	3	3	4	4	3	7.1	7.1	7.1	69.283	631	631	0	9.7793	By MS/MS	By MS/MS	By matching	By MS/MS	433	39565	40681	44586	37609	43359	40800	32958	45985	34961	581.42	37260	38470	45634
Q99878;Q96KK5;Q9BTM1;Q16777;Q93077;Q7L7L0;Q6FI13;P20671;P0C0S8;P04908;Q71UI9;P0C0S5;Q96QV6;P16104;Q8IUE6	Q99878;Q96KK5;Q9BTM1;Q16777;Q93077;Q7L7L0;Q6FI13;P20671;P0C0S8;P04908;Q71UI9;P0C0S5;Q96QV6;P16104	3;3;3;3;3;3;3;3;3;3;2;2;2;2;1	3;3;3;3;3;3;3;3;3;3;2;2;2;2;1	3;3;3;3;3;3;3;3;3;3;2;2;2;2;1	Histone H2A type 1-J;Histone H2A type 1-H;Histone H2A.J;Histone H2A type 2-C;Histone H2A type 1-C;Histone H2A type 3;Histone H2A type 2-A;Histone H2A type 1-D;Histone H2A type 1;Histone H2A type 1-B/E;Histone H2A.V;Histone H2A.Z;Histone H2A type 1-A;Histone H2AX	HIST1H2AJ;HIST1H2AH;H2AFJ;HIST2H2AC;HIST1H2AC;HIST3H2A;HIST2H2AA3;HIST1H2AD;HIST1H2AG;HIST1H2AB;H2AFV;H2AFZ;HIST1H2AA;H2AFX	sp|Q99878|H2A1J_HUMAN Histone H2A type 1-J OS=Homo sapiens GN=HIST1H2AJ PE=1 SV=3;sp|Q96KK5|H2A1H_HUMAN Histone H2A type 1-H OS=Homo sapiens GN=HIST1H2AH PE=1 SV=3;sp|Q9BTM1|H2AJ_HUMAN Histone H2A.J OS=Homo sapiens GN=H2AFJ PE=1 SV=1;sp|Q16777|H2A2C_HUMAN	15	3	3	3	3	2	2	3	3	2	2	3	3	2	2	3	27.3	27.3	27.3	13.936	128	128;128;129;129;130;130;130;130;130;130;128;128;131;143;130	0	12.546	By MS/MS	By MS/MS	By MS/MS	By MS/MS	8856.3	81226	68835	92153	82066	99344	86290	58409	84462	74197	8759.3	76573	65911	94544
P05023;P13637;P50993;Q13733;P20648	P05023;P13637	26;13;12;8;4	26;13;12;8;4	22;9;8;4;1	Sodium/potassium-transporting ATPase subunit alpha-1;Sodium/potassium-transporting ATPase subunit alpha-3	ATP1A1;ATP1A3	sp|P05023|AT1A1_HUMAN Sodium/potassium-transporting ATPase subunit alpha-1 OS=Homo sapiens GN=ATP1A1 PE=1 SV=1;sp|P13637|AT1A3_HUMAN Sodium/potassium-transporting ATPase subunit alpha-3 OS=Homo sapiens GN=ATP1A3 PE=1 SV=3	5	26	26	22	19	25	19	26	19	25	19	26	17	22	16	22	29.1	29.1	25.4	112.89	1023	1023;1013;1020;1029;1035	0	146.05	By MS/MS	By MS/MS	By MS/MS	By MS/MS	2904.2	602630	522660	635590	730590	661570	629990	517780	665140	693790	4261.5	567370	497540	654440
P05141;Q9H0C2	P05141	15;3	5;0	5;0	ADP/ATP translocase 2;ADP/ATP translocase 2, N-terminally processed	SLC25A5	sp|P05141|ADT2_HUMAN ADP/ATP translocase 2 OS=Homo sapiens GN=SLC25A5 PE=1 SV=7	2	15	5	5	11	14	14	15	5	4	5	5	5	4	5	5	45.3	19.5	19.5	32.852	298	298;315	0	51.082	By MS/MS	By MS/MS	By MS/MS	By MS/MS	1321.7	372340	357460	366960	478120	408380	428710	332410	447230	650370	2745.2	350450	339930	380280
P05386	P05386	2	2	2	60S acidic ribosomal protein P1	RPLP1	sp|P05386|RLA1_HUMAN 60S acidic ribosomal protein P1 OS=Homo sapiens GN=RPLP1 PE=1 SV=1	1	2	2	2	2	2	2	2	2	2	2	2	2	2	2	2	51.8	51.8	51.8	11.514	114	114	0	61.872	By MS/MS	By MS/MS	By MS/MS	By MS/MS	617.27	185190	187520	206750	187830	169860	197760	129520	218180	175520	1321.1	174140	177440	210900
P05387	P05387	5	5	5	60S acidic ribosomal protein P2	RPLP2	sp|P05387|RLA2_HUMAN 60S acidic ribosomal protein P2 OS=Homo sapiens GN=RPLP2 PE=1 SV=1	1	5	5	5	4	5	5	5	4	5	5	5	4	5	5	5	76.5	76.5	76.5	11.665	115	115	0	114	By MS/MS	By MS/MS	By MS/MS	By MS/MS	1505.4	376140	387050	427770	396560	364620	401010	257450	378990	371600	3206.2	353890	366380	436200
P05388;Q8NHW5	P05388;Q8NHW5	9;5	9;5	9;5	60S acidic ribosomal protein P0;60S acidic ribosomal protein P0-like	RPLP0;RPLP0P6	sp|P05388|RLA0_HUMAN 60S acidic ribosomal protein P0 OS=Homo sapiens GN=RPLP0 PE=1 SV=1;sp|Q8NHW5|RLA0L_HUMAN 60S acidic ribosomal protein P0-like OS=Homo sapiens GN=RPLP0P6 PE=5 SV=1	2	9	9	9	3	8	2	8	3	8	2	8	3	8	2	8	41.6	41.6	41.6	34.273	317	317;317	0	99.028	By matching	By MS/MS	By MS/MS	By MS/MS	1217.6	289300	289050	310450	186500	201140	201350	137920	238210	195460	2587.8	271520	272080	316010
P05455	P05455	2	2	2	Lupus La protein	SSB	sp|P05455|LA_HUMAN Lupus La protein OS=Homo sapiens GN=SSB PE=1 SV=2	1	2	2	2	0	1	0	2	0	1	0	2	0	1	0	2	6.6	6.6	6.6	46.836	408	408	0	7.0882		By MS/MS		By MS/MS	0	5434.1	9349.7	9811.1	8532	10200	7638.1	5707.1	9475.4	4838.7	0	5162.9	8833.1	9828.5
P05496;Q06055;P48201	P05496;Q06055;P48201	1;1;1	1;1;1	1;1;1	ATP synthase F(0) complex subunit C1, mitochondrial;ATP synthase F(0) complex subunit C2, mitochondrial;ATP synthase F(0) complex subunit C3, mitochondrial	ATP5G1;ATP5G2;ATP5G3	sp|P05496|AT5G1_HUMAN ATP synthase F(0) complex subunit C1, mitochondrial OS=Homo sapiens GN=ATP5G1 PE=1 SV=2;sp|Q06055|AT5G2_HUMAN ATP synthase F(0) complex subunit C2, mitochondrial OS=Homo sapiens GN=ATP5G2 PE=2 SV=1;sp|P48201|AT5G3_HUMAN ATP synthase F	3	1	1	1	1	1	1	1	1	1	1	1	1	1	1	1	5.1	5.1	5.1	14.277	136	136;141;142	0.0013755	1.6562	By matching	By MS/MS	By matching	By MS/MS	0	21050	38269	32403	45736	75067	30734	47164	61747	27693	194.19	20244	36306	33797
P06454	P06454	2	2	2	Prothymosin alpha;Prothymosin alpha, N-terminally processed;Thymosin alpha-1	PTMA	sp|P06454|PTMA_HUMAN Prothymosin alpha OS=Homo sapiens GN=PTMA PE=1 SV=2	1	2	2	2	2	1	2	2	2	1	2	2	2	1	2	2	21.6	21.6	21.6	12.203	111	111	0	24.205	By MS/MS	By MS/MS	By MS/MS	By MS/MS	720.17	115430	57916	67049	58464	69358	85406	44819	49591	55983	889.59	108050	54844	72689
P06493;P24941;Q00526;Q00535;P11802;Q00534;P50750;Q96Q40;O94921;Q07002;Q00536;Q00537;Q9NYV4;Q14004	P06493;P24941;Q00526	4;2;2;1;1;1;1;1;1;1;1;1;1;1	4;2;2;1;1;1;1;1;1;1;1;1;1;1	4;2;2;1;1;1;1;1;1;1;1;1;1;1	Cyclin-dependent kinase 1;Cyclin-dependent kinase 2;Cyclin-dependent kinase 3	CDK1;CDK2;CDK3	sp|P06493|CDK1_HUMAN Cyclin-dependent kinase 1 OS=Homo sapiens GN=CDK1 PE=1 SV=3;sp|P24941|CDK2_HUMAN Cyclin-dependent kinase 2 OS=Homo sapiens GN=CDK2 PE=1 SV=2;sp|Q00526|CDK3_HUMAN Cyclin-dependent kinase 3 OS=Homo sapiens GN=CDK3 PE=1 SV=1	14	4	4	4	3	3	1	3	3	3	1	3	3	3	1	3	14.5	14.5	14.5	34.095	297	297;298;305;292;303;326;372;435;469;472;496;523;1490;1512	0	7.6439	By matching	By MS/MS	By MS/MS	By MS/MS	557.02	75101	65150	71854	69229	60381	62643	45319	69567	61191	860.52	70515	61726	74088
P06576	P06576	24	24	24	ATP synthase subunit beta, mitochondrial	ATP5B	sp|P06576|ATPB_HUMAN ATP synthase subunit beta, mitochondrial OS=Homo sapiens GN=ATP5B PE=1 SV=3	1	24	24	24	22	22	21	19	22	22	21	19	22	22	21	19	59.7	59.7	59.7	56.559	529	529	0	188.65	By MS/MS	By MS/MS	By MS/MS	By MS/MS	4319.9	1072700	857660	970890	1100300	1031400	1063700	840680	999380	1176100	6565.9	1008300	815020	1011000
P06733;P13929;P09104	P06733	9;1;1	9;1;1	9;1;1	Alpha-enolase	ENO1	sp|P06733|ENOA_HUMAN Alpha-enolase OS=Homo sapiens GN=ENO1 PE=1 SV=2	3	9	9	9	7	7	6	8	7	7	6	8	7	7	6	8	24.7	24.7	24.7	47.168	434	434;434;434	0	38.003	By MS/MS	By MS/MS	By MS/MS	By MS/MS	1125.6	274340	162560	181240	120000	137360	162240	109020	117440	137400	1772.7	256660	153260	192460
P06748	P06748	11	11	11	Nucleophosmin	NPM1	sp|P06748|NPM_HUMAN Nucleophosmin OS=Homo sapiens GN=NPM1 PE=1 SV=2	1	11	11	11	8	10	10	10	8	10	10	10	8	10	10	10	33.7	33.7	33.7	32.575	294	294	0	44.064	By MS/MS	By MS/MS	By MS/MS	By MS/MS	1051.6	324800	254310	298990	242570	290320	256150	222910	241030	271040	2268.7	305140	240480	310210
Q16778;P33778;P23527;P06899;Q8N257;Q6DRA6;Q6DN03	Q16778;P33778;P23527;P06899;Q8N257	7;7;7;7;5;3;3	1;1;1;1;1;1;1	1;1;1;1;1;1;1	Histone H2B type 2-E;Histone H2B type 1-B;Histone H2B type 1-O;Histone H2B type 1-J;Histone H2B type 3-B	HIST2H2BE;HIST1H2BB;HIST1H2BO;HIST1H2BJ;HIST3H2BB	sp|Q16778|H2B2E_HUMAN Histone H2B type 2-E OS=Homo sapiens GN=HIST2H2BE PE=1 SV=3;sp|P33778|H2B1B_HUMAN Histone H2B type 1-B OS=Homo sapiens GN=HIST1H2BB PE=1 SV=2;sp|P23527|H2B1O_HUMAN Histone H2B type 1-O OS=Homo sapiens GN=HIST1H2BO PE=1 SV=3;sp|P06899|	7	7	1	1	7	6	6	7	1	0	1	1	1	0	1	1	52.4	7.9	7.9	13.92	126	126;126;126;126;126;164;193	0	2.1933	By MS/MS	By matching	By MS/MS	By matching	99.873	20812	14597	24768	39474	37953	28165	21022	17742	32277	156.35	19718	14164	25642
P07195	P07195	4	3	3	L-lactate dehydrogenase B chain	LDHB	sp|P07195|LDHB_HUMAN L-lactate dehydrogenase B chain OS=Homo sapiens GN=LDHB PE=1 SV=2	1	4	3	3	4	1	3	3	3	1	3	2	3	1	3	2	11.4	7.8	7.8	36.638	334	334	0	7.5854	By MS/MS	By MS/MS	By MS/MS	By MS/MS	637.98	142460	54700	66675	39056	48998	56682	39408	39581	51266	983.53	133020	51570	73698
P07437;A6NNZ2;CON__ENSEMBL:ENSBTAP00000025008;Q9H4B7	P07437	22;8;5;5	5;0;0;0	4;0;0;0	Tubulin beta chain	TUBB	sp|P07437|TBB5_HUMAN Tubulin beta chain OS=Homo sapiens GN=TUBB PE=1 SV=2	4	22	5	4	17	22	19	18	3	5	4	5	2	4	3	4	50	13.5	10.1	49.67	444	444;444;536;451	0	68.411	By MS/MS	By MS/MS	By MS/MS	By MS/MS	2063.9	375010	373980	424910	427390	398900	432990	326990	492990	454580	3890.8	353080	354660	434380
P07602	P07602	1	1	1	Prosaposin;Saposin-A;Saposin-B-Val;Saposin-B;Saposin-C;Saposin-D	PSAP	sp|P07602|SAP_HUMAN Prosaposin OS=Homo sapiens GN=PSAP PE=1 SV=2	1	1	1	1	0	0	0	1	0	0	0	1	0	0	0	1	2.9	2.9	2.9	58.112	524	524	0	6.829				By MS/MS	0	0	0	0	0	0	0	0	0	0	0	0	0	0
P07737	P07737	2	2	2	Profilin-1	PFN1	sp|P07737|PROF1_HUMAN Profilin-1 OS=Homo sapiens GN=PFN1 PE=1 SV=2	1	2	2	2	2	1	0	1	2	1	0	1	2	1	0	1	21.4	21.4	21.4	15.054	140	140	0	5.0968	By MS/MS	By matching		By MS/MS	231.01	61974	25329	31051	16642	24304	27887	20705	15581	29974	281.92	57894	23855	34053
P07814	P07814	3	3	3	Bifunctional glutamate/proline--tRNA ligase;Glutamate--tRNA ligase;Proline--tRNA ligase	EPRS	sp|P07814|SYEP_HUMAN Bifunctional glutamate/proline--tRNA ligase OS=Homo sapiens GN=EPRS PE=1 SV=5	1	3	3	3	1	2	2	3	1	2	2	3	1	2	2	3	1.9	1.9	1.9	170.59	1512	1512	0	3.8895	By MS/MS	By MS/MS	By MS/MS	By MS/MS	293.11	73300	52843	59955	67853	55241	59813	44700	56396	64754	514.79	68758	50218	62702
P07900;Q14568	P07900;Q14568	8;4	3;1	3;1	Heat shock protein HSP 90-alpha;Heat shock protein HSP 90-alpha A2	HSP90AA1;HSP90AA2P	sp|P07900|HS90A_HUMAN Heat shock protein HSP 90-alpha OS=Homo sapiens GN=HSP90AA1 PE=1 SV=5;sp|Q14568|HS902_HUMAN Heat shock protein HSP 90-alpha A2 OS=Homo sapiens GN=HSP90AA2P PE=1 SV=2	2	8	3	3	8	7	4	6	3	2	1	1	3	2	1	1	11.5	4	4	84.659	732	732;343	0	7.6634	By MS/MS	By matching	By matching	By matching	154.06	53888	14044	19082	12241	14648	18598	13474	8005	16908	217.36	50262	13271	22036
P07910;P0DMR1;O60812;B7ZW38;B2RXH8;Q86SE5	P07910;P0DMR1;O60812;B7ZW38;B2RXH8	15;8;8;8;8;1	15;8;8;8;8;1	15;8;8;8;8;1	Heterogeneous nuclear ribonucleoproteins C1/C2;Heterogeneous nuclear ribonucleoprotein C-like 4;Heterogeneous nuclear ribonucleoprotein C-like 1;Heterogeneous nuclear ribonucleoprotein C-like 3;Heterogeneous nuclear ribonucleoprotein C-like 2	HNRNPC;HNRNPCL4;HNRNPCL1;HNRNPCL3;HNRNPCL2	sp|P07910|HNRPC_HUMAN Heterogeneous nuclear ribonucleoproteins C1/C2 OS=Homo sapiens GN=HNRNPC PE=1 SV=4;sp|P0DMR1|HNRC4_HUMAN Heterogeneous nuclear ribonucleoprotein C-like 4 OS=Homo sapiens GN=HNRNPCL4 PE=3 SV=1;sp|O60812|HNRC1_HUMAN Heterogeneous nuclea	6	15	15	15	10	13	11	14	10	13	11	14	10	13	11	14	41.2	41.2	41.2	33.67	306	306;293;293;293;293;291	0	110.04	By MS/MS	By MS/MS	By MS/MS	By MS/MS	2121.5	619890	541680	559400	542610	582520	548010	480140	655980	563010	3758.1	582530	512570	582310
P07919;A0A096LP55	P07919;A0A096LP55	2;1	2;1	2;1	Cytochrome b-c1 complex subunit 6, mitochondrial;Cytochrome b-c1 complex subunit 6	UQCRH;UQCRHL	sp|P07919|QCR6_HUMAN Cytochrome b-c1 complex subunit 6, mitochondrial OS=Homo sapiens GN=UQCRH PE=1 SV=2;sp|A0A096LP55|QCR6L_HUMAN Cytochrome b-c1 complex subunit 6-like, mitochondrial OS=Homo sapiens GN=UQCRHL PE=3 SV=1	2	2	2	2	2	2	2	2	2	2	2	2	2	2	2	2	18.7	18.7	18.7	10.739	91	91;91	0	4.8806	By MS/MS	By MS/MS	By MS/MS	By MS/MS	156.33	62772	62819	72720	75447	88150	88932	67140	84334	82246	417.46	59267	59613	74777
P08195	P08195	7	7	7	4F2 cell-surface antigen heavy chain	SLC3A2	sp|P08195|4F2_HUMAN 4F2 cell-surface antigen heavy chain OS=Homo sapiens GN=SLC3A2 PE=1 SV=3	1	7	7	7	6	7	5	6	6	7	5	6	6	7	5	6	14.8	14.8	14.8	67.993	630	630	0	56.385	By MS/MS	By MS/MS	By MS/MS	By MS/MS	662.11	196310	169770	187560	218600	197730	196010	150310	218470	262600	1003.9	184620	161320	194490
P08237;P17858;Q01813	P08237;P17858;Q01813	1;1;1	1;1;1	1;1;1	ATP-dependent 6-phosphofructokinase, muscle type;ATP-dependent 6-phosphofructokinase, liver type;ATP-dependent 6-phosphofructokinase, platelet type	PFKM;PFKL;PFKP	sp|P08237|PFKAM_HUMAN ATP-dependent 6-phosphofructokinase, muscle type OS=Homo sapiens GN=PFKM PE=1 SV=2;sp|P17858|PFKAL_HUMAN ATP-dependent 6-phosphofructokinase, liver type OS=Homo sapiens GN=PFKL PE=1 SV=6;sp|Q01813|PFKAP_HUMAN ATP-dependent 6-phosphofr	3	1	1	1	1	1	0	1	1	1	0	1	1	1	0	1	1.2	1.2	1.2	85.182	780	780;780;784	0	2.0302	By matching	By MS/MS		By MS/MS	0	23526	17025	17987	18161	20894	17530	15011	26329	19360	0	22087	16121	19036
P08238;Q58FF8;Q58FF7;Q58FG0	P08238	19;6;5;1	19;6;5;1	12;3;5;0	Heat shock protein HSP 90-beta	HSP90AB1	sp|P08238|HS90B_HUMAN Heat shock protein HSP 90-beta OS=Homo sapiens GN=HSP90AB1 PE=1 SV=4	4	19	19	12	15	19	12	19	15	19	12	19	9	12	9	12	23.5	23.5	14	83.263	724	724;381;597;334	0	147	By MS/MS	By MS/MS	By MS/MS	By MS/MS	8531.7	860970	590730	653810	622240	666010	764800	483240	729610	678160	11337	807560	559840	689830
P08621	P08621	9	9	9	U1 small nuclear ribonucleoprotein 70 kDa	SNRNP70	sp|P08621|RU17_HUMAN U1 small nuclear ribonucleoprotein 70 kDa OS=Homo sapiens GN=SNRNP70 PE=1 SV=2	1	9	9	9	6	9	5	7	6	9	5	7	6	9	5	7	16	16	16	51.556	437	437	0	26.035	By MS/MS	By MS/MS	By MS/MS	By MS/MS	351.56	128380	141290	151760	108180	127430	123780	100820	153200	117310	701.67	120830	133220	154340
P08670;P17661	P08670	12;2	11;2	9;0	Vimentin	VIM	sp|P08670|VIME_HUMAN Vimentin OS=Homo sapiens GN=VIM PE=1 SV=4	2	12	11	9	6	11	2	7	5	10	1	6	4	8	1	5	29.2	27.7	24	53.651	466	466;470	0	54.413	By MS/MS	By MS/MS	By matching	By MS/MS	8851.8	127970	120320	128800	112570	135680	123110	86164	134630	95396	8815.6	120420	114320	133070
P08708	P08708	6	6	6	40S ribosomal protein S17	RPS17	sp|P08708|RS17_HUMAN 40S ribosomal protein S17 OS=Homo sapiens GN=RPS17 PE=1 SV=2	1	6	6	6	2	6	2	5	2	6	2	5	2	6	2	5	46.7	46.7	46.7	15.55	135	135	0	25.051	By MS/MS	By MS/MS	By matching	By MS/MS	949.57	133650	139580	146920	160960	172300	173010	107860	182230	133150	1199.5	126050	132400	151400
P09012;P08579	P09012	3;1	3;1	3;1	U1 small nuclear ribonucleoprotein A	SNRPA	sp|P09012|SNRPA_HUMAN U1 small nuclear ribonucleoprotein A OS=Homo sapiens GN=SNRPA PE=1 SV=3	2	3	3	3	1	3	2	3	1	3	2	3	1	3	2	3	8.9	8.9	8.9	31.279	282	282;225	0	5.6352	By matching	By MS/MS	By matching	By MS/MS	11.795	101300	126450	131500	53021	64564	61613	50929	72888	45426	789.74	95122	118590	131790
P09211	P09211	2	2	2	Glutathione S-transferase P	GSTP1	sp|P09211|GSTP1_HUMAN Glutathione S-transferase P OS=Homo sapiens GN=GSTP1 PE=1 SV=2	1	2	2	2	2	2	1	2	2	2	1	2	2	2	1	2	14.3	14.3	14.3	23.356	210	210	0	15.451	By matching	By MS/MS	By matching	By MS/MS	0	16533	18143	19337	16277	18222	16785	15494	29383	22551	0	15573	17137	19732
P09496	P09496	3	3	3	Clathrin light chain A	CLTA	sp|P09496|CLCA_HUMAN Clathrin light chain A OS=Homo sapiens GN=CLTA PE=1 SV=1	1	3	3	3	1	3	1	3	1	3	1	3	1	3	1	3	10.5	10.5	10.5	27.076	248	248	0	5.1062	By matching	By MS/MS	By matching	By MS/MS	84.986	62535	60385	63108	46940	51891	50194	33425	61333	45788	463.07	58740	56940	64798
P09497	P09497	2	2	2	Clathrin light chain B	CLTB	sp|P09497|CLCB_HUMAN Clathrin light chain B OS=Homo sapiens GN=CLTB PE=1 SV=1	1	2	2	2	0	2	0	2	0	2	0	2	0	2	0	2	8.3	8.3	8.3	25.19	229	229	0	2.3334		By MS/MS		By MS/MS	0	20579	23504	24446	21472	23971	21984	15444	25892	18205	0	19395	22205	24948
P09543	P09543	1	1	1	2,3-cyclic-nucleotide 3-phosphodiesterase	CNP	sp|P09543|CN37_HUMAN 2,3-cyclic-nucleotide 3-phosphodiesterase OS=Homo sapiens GN=CNP PE=1 SV=2	1	1	1	1	0	0	0	1	0	0	0	1	0	0	0	1	2.4	2.4	2.4	47.578	421	421	0.0074906	1.171				By MS/MS	0	8326.6	7366.1	6520	8266.8	12743	7480.7	8895.8	10193	9751.4	0	7857.8	6980.8	7025.7
P09651;Q32P51	P09651	3;1	3;1	3;1	Heterogeneous nuclear ribonucleoprotein A1;Heterogeneous nuclear ribonucleoprotein A1, N-terminally processed	HNRNPA1	sp|P09651|ROA1_HUMAN Heterogeneous nuclear ribonucleoprotein A1 OS=Homo sapiens GN=HNRNPA1 PE=1 SV=5	2	3	3	3	3	3	1	3	3	3	1	3	3	3	1	3	10.8	10.8	10.8	38.746	372	372;320	0	29.739	By MS/MS	By MS/MS	By matching	By MS/MS	268.58	99364	78184	80712	51766	58832	61736	43401	61347	52058	449.46	93086	73608	84038
P09669	P09669	1	1	1	Cytochrome c oxidase subunit 6C	COX6C	sp|P09669|COX6C_HUMAN Cytochrome c oxidase subunit 6C OS=Homo sapiens GN=COX6C PE=1 SV=2	1	1	1	1	0	1	0	1	0	1	0	1	0	1	0	1	10.7	10.7	10.7	8.7813	75	75	0.0074166	1.1496		By MS/MS		By matching	0	22712	14705	33698	15662	14614	17237	10349	13151	8047.3	0	21343	13924	33492
P09874	P09874	1	1	1	Poly [ADP-ribose] polymerase 1	PARP1	sp|P09874|PARP1_HUMAN Poly [ADP-ribose] polymerase 1 OS=Homo sapiens GN=PARP1 PE=1 SV=4	1	1	1	1	1	0	0	0	1	0	0	0	1	0	0	0	1	1	1	113.08	1014	1014	0.0097324	1.0952	By MS/MS				0	9458.2	3734.7	5732.5	4214.9	6527.1	5569.9	6075.4	2711.7	7401.6	0	8860.2	3539.6	6201.7
P0C0L5;P0C0L4	P0C0L5;P0C0L4	1;1	1;1	1;1	Complement C4-B;Complement C4 beta chain;Complement C4-B alpha chain;C4a anaphylatoxin;C4b-B;C4d-B;Complement C4 gamma chain;Complement C4-A;Complement C4 beta chain;Complement C4-A alpha chain;C4a anaphylatoxin;C4b-A;C4d-A;Complement C4 gamma chain	C4B;C4A	sp|P0C0L5|CO4B_HUMAN Complement C4-B OS=Homo sapiens GN=C4B PE=1 SV=2;sp|P0C0L4|CO4A_HUMAN Complement C4-A OS=Homo sapiens GN=C4A PE=1 SV=2	2	1	1	1	1	0	1	0	1	0	1	0	1	0	1	0	0.5	0.5	0.5	192.75	1744	1744;1744	0.0013774	1.6723	By matching		By MS/MS		0	4817.5	4962.2	6501	49937	7743.4	13891	5281.8	5821.9	8499.4	0	4559.2	5324.1	6625
P0C2Y1;Q9H094;Q6P3W6;Q86T75;Q3BBW0;Q3BBV2;Q3BBV1;Q3BBV0	P0C2Y1;Q9H094;Q6P3W6;Q86T75;Q3BBW0;Q3BBV2;Q3BBV1;Q3BBV0	1;1;1;1;1;1;1;1	1;1;1;1;1;1;1;1	1;1;1;1;1;1;1;1	Putative neuroblastoma breakpoint family member 7;Neuroblastoma breakpoint family member 3;Neuroblastoma breakpoint family member 10;Neuroblastoma breakpoint family member 11;Neuroblastoma breakpoint family member 9;Putative neuroblastoma breakpoint family member 8;Neuroblastoma breakpoint family member 20;Neuroblastoma breakpoint family member 1	NBPF7;NBPF3;NBPF10;NBPF11;NBPF9;NBPF8;NBPF20;NBPF1	sp|P0C2Y1|NBPF7_HUMAN Putative neuroblastoma breakpoint family member 7 OS=Homo sapiens GN=NBPF7 PE=5 SV=1;sp|Q9H094|NBPF3_HUMAN Neuroblastoma breakpoint family member 3 OS=Homo sapiens GN=NBPF3 PE=2 SV=1;sp|Q6P3W6|NBPFA_HUMAN Neuroblastoma breakpoint fami	8	1	1	1	0	1	0	1	0	1	0	1	0	1	0	1	1.9	1.9	1.9	48.09	421	421;633;841;865;867;869;942;1214	0.0097087	1.0912		By matching		By MS/MS	0	3108	1894.5	2618.8	2503.4	3807.4	2435.6	2227.8	3092.6	2301.6	0	2926.6	1800.6	2769.8
P47985;P0C7P4	P47985;P0C7P4	1;1	1;1	1;1	Cytochrome b-c1 complex subunit Rieske, mitochondrial;Cytochrome b-c1 complex subunit 11;Putative cytochrome b-c1 complex subunit Rieske-like protein 1	UQCRFS1;UQCRFS1P1	sp|P47985|UCRI_HUMAN Cytochrome b-c1 complex subunit Rieske, mitochondrial OS=Homo sapiens GN=UQCRFS1 PE=1 SV=2;sp|P0C7P4|UCRIL_HUMAN Putative cytochrome b-c1 complex subunit Rieske-like protein 1 OS=Homo sapiens GN=UQCRFS1P1 PE=5 SV=1	2	1	1	1	0	1	1	1	0	1	1	1	0	1	1	1	3.3	3.3	3.3	29.668	274	274;283	0.0052151	1.3548		By matching	By MS/MS	By matching	0	21500	9537.7	6563.4	19685	9666.6	12858	7550.3	9721.9	15121	0	20078	9164.5	7913.6
Q01105;P0DME0	Q01105;P0DME0	1;1	1;1	1;1	Protein SET;Protein SETSIP	SET;SETSIP	sp|Q01105|SET_HUMAN Protein SET OS=Homo sapiens GN=SET PE=1 SV=3;sp|P0DME0|SETLP_HUMAN Protein SETSIP OS=Homo sapiens GN=SETSIP PE=1 SV=1	2	1	1	1	1	1	1	0	1	1	1	0	1	1	1	0	2.8	2.8	2.8	33.488	290	290;302	0.0096852	1.088	By MS/MS	By matching	By matching		937.54	33628	12899	18582	14214	24636	17139	14124	8735.1	23284	969.11	31506	12285	20407
P0DMV9;P0DMV8	P0DMV9;P0DMV8	34;34	28;28	16;16	Heat shock 70 kDa protein 1B;Heat shock 70 kDa protein 1A	HSPA1B;HSPA1A	sp|P0DMV9|HS71B_HUMAN Heat shock 70 kDa protein 1B OS=Homo sapiens GN=HSPA1B PE=1 SV=1;sp|P0DMV8|HS71A_HUMAN Heat shock 70 kDa protein 1A OS=Homo sapiens GN=HSPA1A PE=1 SV=1	2	34	28	16	27	32	31	33	22	27	25	28	12	15	15	16	61	55.4	31.8	70.051	641	641;641	0	260.29	By MS/MS	By MS/MS	By MS/MS	By MS/MS	3009.5	1416200	1299700	1425600	1431000	1375800	1506100	1030500	1423500	1547800	7011.8	1331800	1231500	1469600
P0DN76;Q01081;Q8WU68	P0DN76;Q01081;Q8WU68	2;2;1	2;2;1	2;2;1	Splicing factor U2AF 35 kDa subunit;Splicing factor U2AF 26 kDa subunit	U2AF1;U2AF1L4	sp|P0DN76|U2AF5_HUMAN Splicing factor U2AF 35 kDa subunit-like protein OS=Homo sapiens GN=U2AF1L5 PE=1 SV=1;sp|Q01081|U2AF1_HUMAN Splicing factor U2AF 35 kDa subunit OS=Homo sapiens GN=U2AF1 PE=1 SV=3;sp|Q8WU68|U2AF4_HUMAN Splicing factor U2AF 26 kDa subun	3	2	2	2	0	2	0	2	0	2	0	2	0	2	0	2	10.4	10.4	10.4	27.872	240	240;240;220	0	3.46		By MS/MS		By MS/MS	0	10431	10306	11335	6685.7	8010.3	7591.4	6139	8979.3	7964.7	0	9796.1	9698.3	11546
P0DP25;P0DP24;P0DP23	P0DP25;P0DP24;P0DP23	1;1;1	1;1;1	1;1;1			sp|P0DP25|CALM3_HUMAN Calmodulin-3 OS=Homo sapiens GN=CALM3 PE=1 SV=1;sp|P0DP24|CALM2_HUMAN Calmodulin-2 OS=Homo sapiens GN=CALM2 PE=1 SV=1;sp|P0DP23|CALM1_HUMAN Calmodulin-1 OS=Homo sapiens GN=CALM1 PE=1 SV=1	3	1	1	1	1	1	0	1	1	1	0	1	1	1	0	1	8.7	8.7	8.7	16.837	149	149;149;149	0	2.5031	By MS/MS	By matching		By matching	0	6243.9	3475.8	4622.6	4511.2	6725.2	6409.8	6001.6	2781.8	7363.5	0	5870.2	3302.5	4942.8
P10412;P16403;P16402;Q02539;P22492;P16401	P10412;P16403;P16402	7;6;6;3;2;2	7;6;6;3;2;2	7;6;6;3;2;2	Histone H1.4;Histone H1.2;Histone H1.3	HIST1H1E;HIST1H1C;HIST1H1D	sp|P10412|H14_HUMAN Histone H1.4 OS=Homo sapiens GN=HIST1H1E PE=1 SV=2;sp|P16403|H12_HUMAN Histone H1.2 OS=Homo sapiens GN=HIST1H1C PE=1 SV=2;sp|P16402|H13_HUMAN Histone H1.3 OS=Homo sapiens GN=HIST1H1D PE=1 SV=2	6	7	7	7	6	7	6	5	6	7	6	5	6	7	6	5	29.7	29.7	29.7	21.865	219	219;213;221;215;207;226	0	23.611	By MS/MS	By MS/MS	By MS/MS	By MS/MS	6348.6	253980	203040	236920	255790	297980	242500	175240	207120	244940	7193.2	239140	193250	247400
P10515	P10515	4	4	4	Dihydrolipoyllysine-residue acetyltransferase component of pyruvate dehydrogenase complex, mitochondrial	DLAT	sp|P10515|ODP2_HUMAN Dihydrolipoyllysine-residue acetyltransferase component of pyruvate dehydrogenase complex, mitochondrial OS=Homo sapiens GN=DLAT PE=1 SV=3	1	4	4	4	2	3	1	4	2	3	1	4	2	3	1	4	9.9	9.9	9.9	68.996	647	647	0	15.298	By matching	By MS/MS	By matching	By MS/MS	409.79	52160	51432	57516	42798	47452	47861	35223	61370	47970	640.71	49045	48561	58719
P10599	P10599	6	6	6	Thioredoxin	TXN	sp|P10599|THIO_HUMAN Thioredoxin OS=Homo sapiens GN=TXN PE=1 SV=3	1	6	6	6	6	6	5	4	6	6	5	4	6	6	5	4	39	39	39	11.737	105	105	0	11.27	By MS/MS	By MS/MS	By MS/MS	By MS/MS	1134.7	170290	240590	262210	223930	234870	274130	164700	249960	207120	2372.2	160990	227440	263430
P10606	P10606	4	4	4	Cytochrome c oxidase subunit 5B, mitochondrial	COX5B	sp|P10606|COX5B_HUMAN Cytochrome c oxidase subunit 5B, mitochondrial OS=Homo sapiens GN=COX5B PE=1 SV=2	1	4	4	4	1	4	2	4	1	4	2	4	1	4	2	4	24	24	24	13.696	129	129	0	11.825	By matching	By MS/MS	By matching	By MS/MS	276.17	57103	68922	69670	59412	70056	65290	46477	77593	54544	422.36	53852	65084	71037
[truncated: 614 more rows]
[truncated: 167 more columns]

## Sheet: All peptides
Sequence	N-term cleavage window	C-term cleavage window	Amino acid before	First amino acid	Second amino acid	Second last amino acid	Last amino acid	Amino acid after	A Count	R Count	N Count	D Count	C Count	Q Count	E Count	G Count	H Count	I Count	L Count	K Count	M Count	F Count	P Count	S Count	T Count	W Count	Y Count	V Count	U Count	O Count	Length	Missed cleavages	Mass	Proteins	Leading razor protein	Start position	End position	Gene names	Protein names	Unique (Groups)	Unique (Proteins)	Charges	PEP	Score	Identification type A1-MS2	Identification type A2-MS2	Identification type C1-MS2	Identification type C2-MS2	Experiment A1-MS2
[truncated: 6,704 more rows]
[truncated: 168 more columns]
