# Supplementary material for: Bacterial OTU deubiquitinases regulate substrate ubiquitination upon Legionella infection
Source: eLife. 2020 Nov 13;9:e58277. doi: 10.7554/eLife.58277 (PMC7690952; doi:10.7554/eLife.58277)
Supplement: Figure 5—source data 1. [file elife-58277-fig5-data1.xlsx]

## Sheet: LotB (lpg 1621)
Majority protein IDs	Protein IDs	Protein names	Gene names	Student's T-test Significant 1621_mut_Empvec	Log2 Fold change 1621_mut_Empvec	p-value(-log10) of fold change 1621_mut_Empvec
A5YKK6	A5YKK6	CCR4-NOT transcription complex subunit 1	CNOT1	+	1.38478	1.87318
O00264	O00264	Membrane-associated progesterone receptor component 1	PGRMC1	+	3.26814	1.93186
O14744	O14744	Protein arginine N-methyltransferase 5;Protein arginine N-methyltransferase 5, N-terminally processed	PRMT5	+	0.385663	1.1294
O15294	O15294	UDP-N-acetylglucosamine--peptide N-acetylglucosaminyltransferase 110 kDa subunit	OGT	+	0.680894	1.51198
O15397	O15397	Importin-8	IPO8	+	0.847915	2.03339
O43175	O43175	D-3-phosphoglycerate dehydrogenase	PHGDH	+	0.854155	1.60882
O75688	O75688;P35813	Protein phosphatase 1B	PPM1B	+	1.03495	1.86319
O75947	O75947	ATP synthase subunit d, mitochondrial	ATP5H	+	1.0773	3.62103
P00387	P00387	NADH-cytochrome b5 reductase 3;NADH-cytochrome b5 reductase 3 membrane-bound form;NADH-cytochrome b5 reductase 3 soluble form	CYB5R3	+	1.31803	1.45127
P02786	P02786	Transferrin receptor protein 1;Transferrin receptor protein 1, serum form	TFRC	+	1.4774	2.24632
P04843	P04843	Dolichyl-diphosphooligosaccharide--protein glycosyltransferase subunit 1	RPN1	+	2.95135	1.73929
P05141	P05141;Q9H0C2	ADP/ATP translocase 2;ADP/ATP translocase 2, N-terminally processed	SLC25A5	+	1.12574	1.98424
P06576	P06576	ATP synthase subunit beta, mitochondrial	ATP5B	+	1.28489	3.13081
P06748	P06748	Nucleophosmin	NPM1	+	3.07688	2.89925
P07437	P07437;A6NNZ2;CON__ENSEMBL:ENSBTAP00000025008;Q9H4B7	Tubulin beta chain	TUBB	+	1.02077	2.62598
P07910;P0DMR1;O60812;B7ZW38;B2RXH8	P07910;P0DMR1;O60812;B7ZW38;B2RXH8;Q86SE5	Heterogeneous nuclear ribonucleoproteins C1/C2;Heterogeneous nuclear ribonucleoprotein C-like 4;Heterogeneous nuclear ribonucleoprotein C-like 1;Heterogeneous nuclear ribonucleoprotein C-like 3;Heterogeneous nuclear ribonucleoprotein C-like 2	HNRNPC;HNRNPCL4;HNRNPCL1;HNRNPCL3;HNRNPCL2	+	1.13615	2.04998
P08195	P08195	4F2 cell-surface antigen heavy chain	SLC3A2	+	1.50342	3.28306
P62987;P62979;P0CG47;P0CG48	P62987;P62979;P0CG47;P0CG48	Ubiquitin-60S ribosomal protein L40;Ubiquitin;60S ribosomal protein L40;Ubiquitin-40S ribosomal protein S27a;Ubiquitin;40S ribosomal protein S27a;Polyubiquitin-B;Ubiquitin;Polyubiquitin-C;Ubiquitin	UBA52;RPS27A;UBB;UBC	+	2.33939	3.87263
P0DMV9;P0DMV8	P0DMV9;P0DMV8	Heat shock 70 kDa protein 1B;Heat shock 70 kDa protein 1A	HSPA1B;HSPA1A	+	1.84356	1.40155
P10809	P10809	60 kDa heat shock protein, mitochondrial	HSPD1	+	2.48738	1.27681
P11142	P11142;P54652	Heat shock cognate 71 kDa protein	HSPA8	+	0.836873	2.08896
P11940	P11940;Q9H361;Q4VXU2;Q5JQF8;P0CB38;Q96DU9	Polyadenylate-binding protein 1	PABPC1	+	2.74114	2.01239
P12004	P12004	Proliferating cell nuclear antigen	PCNA	+	1.84716	2.34699
P12236;P12235	P12236;P12235	ADP/ATP translocase 3;ADP/ATP translocase 3, N-terminally processed;ADP/ATP translocase 1	SLC25A6;SLC25A4	+	1.15054	2.42365
P15735	P15735;Q16816	Phosphorylase b kinase gamma catalytic chain, liver/testis isoform	PHKG2	+	0.940275	1.60893
P17980	P17980	26S protease regulatory subunit 6A	PSMC3	+	1.0968	1.62143
P17987	P17987	T-complex protein 1 subunit alpha	TCP1	+	1.08102	1.19585
P18859	P18859	ATP synthase-coupling factor 6, mitochondrial	ATP5J	+	2.6412	2.80512
P20674	P20674	Cytochrome c oxidase subunit 5A, mitochondrial	COX5A	+	1.13532	3.31226
P21796	P21796	Voltage-dependent anion-selective channel protein 1	VDAC1	+	1.62473	2.4365
P23458	P23458;O60674	Tyrosine-protein kinase JAK1	JAK1	+	1.70489	2.05554
P25705	P25705	ATP synthase subunit alpha, mitochondrial	ATP5A1	+	0.861852	1.50087
P27824	P27824	Calnexin	CANX	+	2.21604	1.48621
P29692	P29692	Elongation factor 1-delta	EEF1D	+	0.722881	1.64679
P31689	P31689	DnaJ homolog subfamily A member 1	DNAJA1	+	1.6999	1.69729
P31930	P31930;O75439	Cytochrome b-c1 complex subunit 1, mitochondrial	UQCRC1	+	2.06951	2.2648
P31943	P31943;P55795	Heterogeneous nuclear ribonucleoprotein H;Heterogeneous nuclear ribonucleoprotein H, N-terminally processed	HNRNPH1	+	1.87041	1.36744
P35232	P35232	Prohibitin	PHB	+	1.07566	1.60917
P35613	P35613	Basigin	BSG	+	2.10186	1.37451
P36542	P36542	ATP synthase subunit gamma, mitochondrial	ATP5C1	+	2.19008	2.2014
P38646	P38646	Stress-70 protein, mitochondrial	HSPA9	+	2.51931	1.86118
P39656	P39656	Dolichyl-diphosphooligosaccharide--protein glycosyltransferase 48 kDa subunit	DDOST	+	1.75729	2.28023
P42167	P42167;P42166	Lamina-associated polypeptide 2, isoforms beta/gamma;Thymopoietin;Thymopentin	TMPO	+	1.78126	2.88224
P42677;Q71UM5	P42677;Q71UM5	40S ribosomal protein S27;40S ribosomal protein S27-like	RPS27;RPS27L	+	3.19884	3.02393
P46019	P46019	Phosphorylase b kinase regulatory subunit alpha, liver isoform	PHKA2	+	1.00881	1.14402
P46020	P46020	Phosphorylase b kinase regulatory subunit alpha, skeletal muscle isoform	PHKA1	+	0.913867	1.25527
P46782	P46782	40S ribosomal protein S5;40S ribosomal protein S5, N-terminally processed	RPS5	+	2.95047	2.45049
P46977	P46977	Dolichyl-diphosphooligosaccharide--protein glycosyltransferase subunit STT3A	STT3A	+	1.35778	1.46048
P48047	P48047	ATP synthase subunit O, mitochondrial	ATP5O	+	1.09529	1.33169
P48444	P48444	Coatomer subunit delta	ARCN1	+	1.99342	3.01022
P48643	P48643	T-complex protein 1 subunit epsilon	CCT5	+	2.55807	2.79742
P49368	P49368	T-complex protein 1 subunit gamma	CCT3	+	1.80309	1.43663
P49411	P49411	Elongation factor Tu, mitochondrial	TUFM	+	3.10429	2.04964
P50402	P50402	Emerin	EMD	+	1.5041	2.8428
P51149	P51149	Ras-related protein Rab-7a	RAB7A	+	1.77873	1.77479
P52272	P52272	Heterogeneous nuclear ribonucleoprotein M	HNRNPM	+	1.84246	1.28364
P53618	P53618	Coatomer subunit beta	COPB1	+	3.04662	3.67651
P54105	P54105	Methylosome subunit pICln	CLNS1A	+	3.28342	1.57407
P54709	P54709	Sodium/potassium-transporting ATPase subunit beta-3	ATP1B3	+	3.36764	2.56723
P55036	P55036	26S proteasome non-ATPase regulatory subunit 4	PSMD4	+	1.61757	1.56272
P55060	P55060	Exportin-2	CSE1L	+	2.13613	1.99758
P57088	P57088	Transmembrane protein 33	TMEM33	+	1.63317	2.20179
P60468	P60468	Protein transport protein Sec61 subunit beta	SEC61B	+	1.90347	2.41273
P61604	P61604	10 kDa heat shock protein, mitochondrial	HSPE1	+	1.4006	1.71539
P61978	P61978	Heterogeneous nuclear ribonucleoprotein K	HNRNPK	+	2.64084	1.18838
P62195	P62195;Q8NB90	26S protease regulatory subunit 8	PSMC5	+	1.62383	2.20906
P62269	P62269	40S ribosomal protein S18	RPS18	+	1.87244	1.33418
P62316	P62316	Small nuclear ribonucleoprotein Sm D2	SNRPD2	+	1.77665	1.22085
P62491;Q15907	P62491;Q15907	Ras-related protein Rab-11A;Ras-related protein Rab-11B	RAB11A;RAB11B	+	1.15492	1.12682
P62873;Q9HAV0	P62873;Q9HAV0;P16520	Guanine nucleotide-binding protein G(I)/G(S)/G(T) subunit beta-1;Guanine nucleotide-binding protein subunit beta-4	GNB1;GNB4	+	0.705629	1.27646
P62937	P62937;P0DN26;A0A0B4J2A2;A0A075B759;Q9Y536;F5H284	Peptidyl-prolyl cis-trans isomerase A;Peptidyl-prolyl cis-trans isomerase A, N-terminally processed	PPIA	+	1.69058	1.45897
P68104;Q5VTE0;Q05639	P68104;Q5VTE0;Q05639	Elongation factor 1-alpha 1;Putative elongation factor 1-alpha-like 3;Elongation factor 1-alpha 2	EEF1A1;EEF1A1P5;EEF1A2	+	0.520192	1.68465
P68363;P68366	P68363;P68366;A6NHL2	Tubulin alpha-1B chain;Tubulin alpha-4A chain	TUBA1B;TUBA4A	+	0.689966	2.24282
P78527	P78527	DNA-dependent protein kinase catalytic subunit	PRKDC	+	1.15134	1.28236
P84090	P84090	Enhancer of rudimentary homolog	ERH	+	1.49468	1.67437
Q01804	Q01804	OTU domain-containing protein 4	OTUD4	+	1.07266	1.54977
Q06830	Q06830;Q13162	Peroxiredoxin-1	PRDX1	+	0.736068	1.76791
Q07065	Q07065;Q96K21	Cytoskeleton-associated protein 4	CKAP4	+	0.982651	1.77292
Q08378	Q08378	Golgin subfamily A member 3	GOLGA3	+	1.42221	1.62244
Q13347	Q13347	Eukaryotic translation initiation factor 3 subunit I	EIF3I	+	2.06074	2.63071
Q14974	Q14974	Importin subunit beta-1	KPNB1	+	2.79241	1.53031
Q15208	Q15208	Serine/threonine-protein kinase 38	STK38	+	0.735258	1.88407
Q15233	Q15233	Non-POU domain-containing octamer-binding protein	NONO	+	1.56596	1.76817
Q16637	Q16637	Survival motor neuron protein	SMN1	+	1.67926	4.51962
Q5T749	Q5T749	Keratinocyte proline-rich protein	KPRP	+	0.863709	1.55259
Q5W0B1	Q5W0B1	RING finger protein 219	RNF219	+	0.760031	1.52749
Q7Z353	Q7Z353	Highly divergent homeobox	HDX	+	2.80239	1.67619
Q8N1I0	Q8N1I0	Dedicator of cytokinesis protein 4	DOCK4	+	1.72211	1.76077
Q8WXF1	Q8WXF1	Paraspeckle component 1	PSPC1	+	2.1816	1.27382
Q93100	Q93100	Phosphorylase b kinase regulatory subunit beta	PHKB	+	0.71095	1.73212
Q96AG4	Q96AG4	Leucine-rich repeat-containing protein 59	LRRC59	+	1.23522	1.42966
Q96JJ3	Q96JJ3;Q92556	Engulfment and cell motility protein 2	ELMO2	+	1.86561	1.85481
Q99417	Q99417	C-Myc-binding protein	MYCBP	+	1.06606	1.30888
Q99623	Q99623	Prohibitin-2	PHB2	+	1.33542	1.658
Q9BQA1	Q9BQA1	Methylosome protein 50	WDR77	+	1.50952	2.33353
Q9BRS2	Q9BRS2	Serine/threonine-protein kinase RIO1	RIOK1	+	0.850203	1.60361
Q9BUA3	Q9BUA3	Uncharacterized protein C11orf84	C11orf84	+	1.14125	1.98283
Q9BVA1	Q9BVA1	Tubulin beta-2B chain	TUBB2B	+	1.17464	1.67158
Q9H3K6	Q9H3K6	BolA-like protein 2	BOLA2	+	1.18738	2.60985
Q9H9B4	Q9H9B4	Sideroflexin-1	SFXN1	+	2.95449	3.23955
Q9NX63	Q9NX63	MICOS complex subunit MIC19	CHCHD3	+	1.41364	2.52521
Q9UH99	Q9UH99	SUN domain-containing protein 2	SUN2	+	2.35003	2.20927
Q9UJZ1	Q9UJZ1	Stomatin-like protein 2, mitochondrial	STOML2	+	0.781805	1.21913
Q9UPQ9	Q9UPQ9	Trinucleotide repeat-containing gene 6B protein	TNRC6B	+	1.33403	1.25272
Q9UQ35	Q9UQ35	Serine/arginine repetitive matrix protein 2	SRRM2	+	0.976524	1.31406
Q9Y230	Q9Y230	RuvB-like 2	RUVBL2	+	1.85227	1.38484
A2NJV5;A0A0A0MRZ7;A0A075B6S2;A0A075B6S6;A0A075B6P5;A0A087WW87;P06310;P01615;P01614	A2NJV5;A0A0A0MRZ7;A0A075B6S2;A0A075B6S6;A0A075B6P5;A0A087WW87;P06310;P01615;P01614;A0A0C4DH68	Ig kappa chain V-II region RPMI 6410;Ig kappa chain V-II region FR;Ig kappa chain V-II region Cum	IGKV A18;IGKV2D-26;IGKV2D-29;IGKV2D-30;IGKV2D-28;IGKV2-40		-0.636347	0.175437
P19105;O14950;P24844	P19105;O14950;P24844	Myosin regulatory light chain 12A;Myosin regulatory light chain 12B;Myosin regulatory light polypeptide 9	MYL12A;MYL12B;MYL9		0.884482	1.07696
Q99880;Q99879;Q99877;Q93079;Q5QNW6;P62807;P58876;P57053;O60814;Q96A08	Q99880;Q99879;Q99877;Q93079;Q5QNW6;P62807;P58876;P57053;O60814;Q96A08	Histone H2B type 1-L;Histone H2B type 1-M;Histone H2B type 1-N;Histone H2B type 1-H;Histone H2B type 2-F;Histone H2B type 1-C/E/F/G/I;Histone H2B type 1-D;Histone H2B type F-S;Histone H2B type 1-K;Histone H2B type 1-A	HIST1H2BL;HIST1H2BM;HIST1H2BN;HIST1H2BH;HIST2H2BF;HIST1H2BC;HIST1H2BD;H2BFS;HIST1H2BK;HIST1H2BA		-1.80293	0.0019812
O95373	O95373	Importin-7	IPO7		0.934793	0.917227
P02686	P02686	Myelin basic protein	MBP		-1.61962	0.00961608
P04075	P04075	Fructose-bisphosphate aldolase A	ALDOA		0.57127	0.670004
P04406	P04406	Glyceraldehyde-3-phosphate dehydrogenase	GAPDH		0.126118	0.372336
P05023	P05023;P20648	Sodium/potassium-transporting ATPase subunit alpha-1	ATP1A1		0.447072	0.727353
P05026	P05026	Sodium/potassium-transporting ATPase subunit beta-1	ATP1B1		-0.888813	0.000766628
P05386	P05386	60S acidic ribosomal protein P1	RPLP1		1.55079	0.776227
P05387	P05387	60S acidic ribosomal protein P2	RPLP2		0.801001	0.967415
P06733	P06733	Alpha-enolase	ENO1		-0.350913	0.135665
P07196	P07196	Neurofilament light polypeptide	NEFL		-0.960052	0.0137916
P08238	P08238;Q58FF8;Q14568;P14625	Heat shock protein HSP 90-beta	HSP90AB1		-0.121737	0.21697
P11021	P11021	78 kDa glucose-regulated protein	HSPA5		1.67172	0.940796
P14618;P30613	P14618;P30613	Pyruvate kinase PKM;Pyruvate kinase PKLR	PKM;PKLR		-0.495279	0.0741108
P15924	P15924	Desmoplakin	DSP		-1.56491	0.00654504
P19474	P19474	E3 ubiquitin-protein ligase TRIM21	TRIM21		1.48125	0.885884
P23528	P23528;Q9Y281	Cofilin-1	CFL1		1.02242	0.88013
P23588	P23588	Eukaryotic translation initiation factor 4B	EIF4B		-0.38545	0.0112597
P24539	P24539	ATP synthase F(0) complex subunit B1, mitochondrial	ATP5F1		1.24431	0.881505
P26373	P26373	60S ribosomal protein L13	RPL13		1.1091	0.780809
P27708	P27708	CAD protein;Glutamine-dependent carbamoyl-phosphate synthase;Aspartate carbamoyltransferase;Dihydroorotase	CAD		0.466091	0.897934
P29966	P29966	Myristoylated alanine-rich C-kinase substrate	MARCKS		-0.637605	0.158348
P30049	P30049	ATP synthase subunit delta, mitochondrial	ATP5D		1.10189	0.897971
P31151;Q86SG5	P31151;Q86SG5	Protein S100-A7;Protein S100-A7A	S100A7;S100A7A		-0.551159	0.0147971
P31153	P31153	S-adenosylmethionine synthase isoform type-2	MAT2A		0.263732	0.512247
P43004	P43004	Excitatory amino acid transporter 2	SLC1A2		-2.20081	0.003909
P43686	P43686	26S protease regulatory subunit 6B	PSMC4		1.03472	1.09193
P53621	P53621	Coatomer subunit alpha;Xenin;Proxenin	COPA		1.10726	1.06946
P56385	P56385	ATP synthase subunit e, mitochondrial	ATP5I		1.33902	1.07921
P60201	P60201	Myelin proteolipid protein	PLP1		-0.941505	0.0985845
P60660	P60660;P14649	Myosin light polypeptide 6	MYL6		1.89154	0.905611
P61353	P61353	60S ribosomal protein L27	RPL27		0	-4.34294e-08
P62241	P62241	40S ribosomal protein S8	RPS8		0	-4.34294e-08
P62258	P62258	14-3-3 protein epsilon	YWHAE		-0.38304	0.20211
P62805	P62805	Histone H4	HIST1H4A		-1.0624	0.00246074
P62917	P62917	60S ribosomal protein L8	RPL8		-0.425133	0.133921
P63261;P60709	P63261;P60709;Q562R1;Q6S8J3;A5A3E0;P0CG38;P0CG39	Actin, cytoplasmic 2;Actin, cytoplasmic 2, N-terminally processed;Actin, cytoplasmic 1;Actin, cytoplasmic 1, N-terminally processed	ACTG1;ACTB		0.0417709	0.387856
P67809	P67809;P16989	Nuclease-sensitive element-binding protein 1	YBX1		1.49859	0.846603
P68371	P68371	Tubulin beta-4B chain	TUBB4B		0.366103	1.0044
P81605	P81605	Dermcidin;Survival-promoting peptide;DCD-1	DCD		-0.370332	0.208001
P98175	P98175;P52756;P78332	RNA-binding protein 10	RBM10		0.165716	0.707629
Q00325	Q00325	Phosphate carrier protein, mitochondrial	SLC25A3		1.96143	1.037
Q13310	Q13310	Polyadenylate-binding protein 4	PABPC4		-0.276115	0.138727
Q14160	Q14160	Protein scribble homolog	SCRIB		0	-4.34294e-08
Q15155;P69849;Q5JPE7	Q15155;P69849;Q5JPE7	Nodal modulator 1;Nodal modulator 3;Nodal modulator 2	NOMO1;NOMO3;NOMO2		0.780244	0.978281
Q16555	Q16555	Dihydropyrimidinase-related protein 2	DPYSL2		-1.05697	0.024454
Q5SWX8	Q5SWX8	Protein odr-4 homolog	ODR4		1.36569	1.02454
Q6N021	Q6N021	Methylcytosine dioxygenase TET2	TET2		1.33586	0.820383
Q8WZA9	Q8WZA9	Immunity-related GTPase family Q protein	IRGQ		-2.80396	0.00453952
Q9NYF8	Q9NYF8	Bcl-2-associated transcription factor 1	BCLAF1		1.00589	0.7592
Q9NZT1	Q9NZT1	Calmodulin-like protein 5	CALML5		1.33177	0.756801
Q9Y265	Q9Y265	RuvB-like 1	RUVBL1		0.225264	0.366827
Q9Y2H1	Q9Y2H1	Serine/threonine-protein kinase 38-like	STK38L		1.59073	0.813407
Q9Y2W1	Q9Y2W1	Thyroid hormone receptor-associated protein 3	THRAP3		0.403266	0.964774
Q9Y657	Q9Y657;Q5JUX0	Spindlin-1	SPIN1		0.420417	0.929047
Q9Y678	Q9Y678	Coatomer subunit gamma-1	COPG1		0.205344	0.411302

## Sheet: LotC (lpg 2529)
Majority protein IDs	Protein names	Gene names	Student's T-test Significant 2529_mut_Empvec	Log2 fold change 2529_mut_Empvec	p-value(-log10) of fold change 2529_mut_Empvec
O75688	Protein phosphatase 1B	PPM1B	+	1.01806	1.87037
O75947	ATP synthase subunit d, mitochondrial	ATP5H	+	0.546258	3.14381
P05386	60S acidic ribosomal protein P1	RPLP1	+	3.3791	2.11314
P05387	60S acidic ribosomal protein P2	RPLP2	+	1.73083	2.94385
P06576	ATP synthase subunit beta, mitochondrial	ATP5B	+	1.0536	2.72638
P06748	Nucleophosmin	NPM1	+	3.02704	3.39338
P07437	Tubulin beta chain	TUBB	+	0.646118	1.96225
P07910;P0DMR1;O60812;B7ZW38;B2RXH8	Heterogeneous nuclear ribonucleoproteins C1/C2;Heterogeneous nuclear ribonucleoprotein C-like 4;Heterogeneous nuclear ribonucleoprotein C-like 1;Heterogeneous nuclear ribonucleoprotein C-like 3;Heterogeneous nuclear ribonucleoprotein C-like 2	HNRNPC;HNRNPCL4;HNRNPCL1;HNRNPCL3;HNRNPCL2	+	1.985	2.07598
P08195	4F2 cell-surface antigen heavy chain	SLC3A2	+	0.887822	2.59133
P62987;P62979;P0CG47;P0CG48	Ubiquitin-60S ribosomal protein L40;Ubiquitin;60S ribosomal protein L40;Ubiquitin-40S ribosomal protein S27a;Ubiquitin;40S ribosomal protein S27a;Polyubiquitin-B;Ubiquitin;Polyubiquitin-C;Ubiquitin	UBA52;RPS27A;UBB;UBC	+	5.16906	4.62293
P11142	Heat shock cognate 71 kDa protein	HSPA8	+	1.05927	2.98991
P11940	Polyadenylate-binding protein 1	PABPC1	+	4.39033	2.73706
P12004	Proliferating cell nuclear antigen	PCNA	+	1.83154	2.65854
P20674	Cytochrome c oxidase subunit 5A, mitochondrial	COX5A	+	0.716265	2.69087
P29692	Elongation factor 1-delta	EEF1D	+	1.4004	2.52807
P31689	DnaJ homolog subfamily A member 1	DNAJA1	+	1.85776	1.79014
P31930	Cytochrome b-c1 complex subunit 1, mitochondrial	UQCRC1	+	1.77363	1.98796
P36542	ATP synthase subunit gamma, mitochondrial	ATP5C1	+	1.65644	1.87994
P38646	Stress-70 protein, mitochondrial	HSPA9	+	2.99803	2.07903
P42677;Q71UM5	40S ribosomal protein S27;40S ribosomal protein S27-like	RPS27;RPS27L	+	2.14483	2.50913
P46782	40S ribosomal protein S5;40S ribosomal protein S5, N-terminally processed	RPS5	+	2.2808	2.12601
P48643	T-complex protein 1 subunit epsilon	CCT5	+	2.35677	2.68543
P53618	Coatomer subunit beta	COPB1	+	1.88122	1.88501
P62195	26S protease regulatory subunit 8	PSMC5	+	1.43973	2.46255
P62241	40S ribosomal protein S8	RPS8	+	1.79753	3.00099
P62937	Peptidyl-prolyl cis-trans isomerase A;Peptidyl-prolyl cis-trans isomerase A, N-terminally processed	PPIA	+	1.39409	2.01974
P67809	Nuclease-sensitive element-binding protein 1	YBX1	+	2.94461	1.902
P68363;P68366	Tubulin alpha-1B chain;Tubulin alpha-4A chain	TUBA1B;TUBA4A	+	0.52984	1.87967
P98175	RNA-binding protein 10	RBM10	+	0.70354	2.0658
Q13310	Polyadenylate-binding protein 4	PABPC4	+	1.17725	1.78449
Q14160	Protein scribble homolog	SCRIB	+	8.97996	4.65486
Q15208	Serine/threonine-protein kinase 38	STK38	+	0.745372	2.07229
Q15233	Non-POU domain-containing octamer-binding protein	NONO	+	1.0697	2.20422
A2NJV5;A0A0A0MRZ7;A0A075B6S2;A0A075B6S6;A0A075B6P5;A0A087WW87;P06310;P01615;P01614	Ig kappa chain V-II region RPMI 6410;Ig kappa chain V-II region FR;Ig kappa chain V-II region Cum	IGKV A18;IGKV2D-26;IGKV2D-29;IGKV2D-30;IGKV2D-28;IGKV2-40		-0.980267	0.131641
A5YKK6	CCR4-NOT transcription complex subunit 1	CNOT1		-0.216317	0.188387
O00264	Membrane-associated progesterone receptor component 1	PGRMC1		2.80001	1.68492
O14744	Protein arginine N-methyltransferase 5;Protein arginine N-methyltransferase 5, N-terminally processed	PRMT5		0.0722764	0.403749
P19105;O14950;P24844	Myosin regulatory light chain 12A;Myosin regulatory light chain 12B;Myosin regulatory light polypeptide 9	MYL12A;MYL12B;MYL9		-0.315249	0.186096
O15294	UDP-N-acetylglucosamine--peptide N-acetylglucosaminyltransferase 110 kDa subunit	OGT		0.667228	1.49269
O15397	Importin-8	IPO8		0.00997289	0.31352
O43175	D-3-phosphoglycerate dehydrogenase	PHGDH		0.330763	1.04613
Q99880;Q99879;Q99877;Q93079;Q5QNW6;P62807;P58876;P57053;O60814;Q96A08	Histone H2B type 1-L;Histone H2B type 1-M;Histone H2B type 1-N;Histone H2B type 1-H;Histone H2B type 2-F;Histone H2B type 1-C/E/F/G/I;Histone H2B type 1-D;Histone H2B type F-S;Histone H2B type 1-K;Histone H2B type 1-A	HIST1H2BL;HIST1H2BM;HIST1H2BN;HIST1H2BH;HIST2H2BF;HIST1H2BC;HIST1H2BD;H2BFS;HIST1H2BK;HIST1H2BA		1.40548	0.80849
O95373	Importin-7	IPO7		-0.145646	0.243321
P00387	NADH-cytochrome b5 reductase 3;NADH-cytochrome b5 reductase 3 membrane-bound form;NADH-cytochrome b5 reductase 3 soluble form	CYB5R3		0.163448	0.376949
P02686	Myelin basic protein	MBP		-0.628278	0.0380235
P02786	Transferrin receptor protein 1;Transferrin receptor protein 1, serum form	TFRC		0.306756	0.531074
P04075	Fructose-bisphosphate aldolase A	ALDOA		-0.0731875	0.261972
P04406	Glyceraldehyde-3-phosphate dehydrogenase	GAPDH		0.363641	0.538327
P04843	Dolichyl-diphosphooligosaccharide--protein glycosyltransferase subunit 1	RPN1		2.32174	1.43333
P05023	Sodium/potassium-transporting ATPase subunit alpha-1	ATP1A1		0.134811	0.412939
P05026	Sodium/potassium-transporting ATPase subunit beta-1	ATP1B1		-0.470898	0.000270061
P05141	ADP/ATP translocase 2;ADP/ATP translocase 2, N-terminally processed	SLC25A5		0.341589	0.746535
P06733	Alpha-enolase	ENO1		-0.968655	0.0236361
P07196	Neurofilament light polypeptide	NEFL		-0.375058	0.0745527
P08238	Heat shock protein HSP 90-beta	HSP90AB1		0.0041364	0.305541
P0DMV9;P0DMV8	Heat shock 70 kDa protein 1B;Heat shock 70 kDa protein 1A	HSPA1B;HSPA1A		2.0313	1.65949
P10809	60 kDa heat shock protein, mitochondrial	HSPD1		2.14367	1.22919
P11021	78 kDa glucose-regulated protein	HSPA5		1.84073	1.01027
P12236;P12235	ADP/ATP translocase 3;ADP/ATP translocase 3, N-terminally processed;ADP/ATP translocase 1	SLC25A6;SLC25A4		0.410748	1.44657
P14618;P30613	Pyruvate kinase PKM;Pyruvate kinase PKLR	PKM;PKLR		-0.396217	0.0951425
P15735	Phosphorylase b kinase gamma catalytic chain, liver/testis isoform	PHKG2		0.5713	1.10896
P15924	Desmoplakin	DSP		-1.45327	0.00899919
P17980	26S protease regulatory subunit 6A	PSMC3		0.228563	0.493627
P17987	T-complex protein 1 subunit alpha	TCP1		-0.370971	0.182099
P18859	ATP synthase-coupling factor 6, mitochondrial	ATP5J		0.832918	0.583751
P19474	E3 ubiquitin-protein ligase TRIM21	TRIM21		1.61939	0.924108
P21796	Voltage-dependent anion-selective channel protein 1	VDAC1		1.07797	0.910111
P23458	Tyrosine-protein kinase JAK1	JAK1		0.543227	1.00354
P23528	Cofilin-1	CFL1		0.647002	0.736399
P23588	Eukaryotic translation initiation factor 4B	EIF4B		-0.399709	0.0121179
P24539	ATP synthase F(0) complex subunit B1, mitochondrial	ATP5F1		0.70086	0.597971
P25705	ATP synthase subunit alpha, mitochondrial	ATP5A1		0.613062	1.20969
P26373	60S ribosomal protein L13	RPL13		2.7021	1.60018
P27708	CAD protein;Glutamine-dependent carbamoyl-phosphate synthase;Aspartate carbamoyltransferase;Dihydroorotase	CAD		-0.323388	0.139347
P27824	Calnexin	CANX		1.44983	1.06044
P29966	Myristoylated alanine-rich C-kinase substrate	MARCKS		-0.264865	0.225721
P30049	ATP synthase subunit delta, mitochondrial	ATP5D		0.558626	0.536078
P31151;Q86SG5	Protein S100-A7;Protein S100-A7A	S100A7;S100A7A		-0.271157	0.135375
P31153	S-adenosylmethionine synthase isoform type-2	MAT2A		-0.053147	0.278345
P31943	Heterogeneous nuclear ribonucleoprotein H;Heterogeneous nuclear ribonucleoprotein H, N-terminally processed	HNRNPH1		1.73187	1.28344
P35232	Prohibitin	PHB		0.851213	1.3796
P35613	Basigin	BSG		-0.781493	0.149952
P39656	Dolichyl-diphosphooligosaccharide--protein glycosyltransferase 48 kDa subunit	DDOST		0.79218	1.28127
P42167	Lamina-associated polypeptide 2, isoforms beta/gamma;Thymopoietin;Thymopentin	TMPO		0.704176	0.87196
P43004	Excitatory amino acid transporter 2	SLC1A2		-4.80039	0.000675932
P43686	26S protease regulatory subunit 6B	PSMC4		0.178185	0.415923
P46019	Phosphorylase b kinase regulatory subunit alpha, liver isoform	PHKA2		0.754053	0.908268
P46020	Phosphorylase b kinase regulatory subunit alpha, skeletal muscle isoform	PHKA1		0.720186	1.09454
P46977	Dolichyl-diphosphooligosaccharide--protein glycosyltransferase subunit STT3A	STT3A		-0.0660871	0.277503
P48047	ATP synthase subunit O, mitochondrial	ATP5O		1.06113	1.24433
P48444	Coatomer subunit delta	ARCN1		0.584559	0.619619
P49368	T-complex protein 1 subunit gamma	CCT3		0.876106	0.815681
P49411	Elongation factor Tu, mitochondrial	TUFM		2.35048	1.606
P50402	Emerin	EMD		-0.0324726	0.277384
P51149	Ras-related protein Rab-7a	RAB7A		0.527313	0.629697
P52272	Heterogeneous nuclear ribonucleoprotein M	HNRNPM		2.28914	1.56722
P53621	Coatomer subunit alpha;Xenin;Proxenin	COPA		0	-4.34294e-08
P54105	Methylosome subunit pICln	CLNS1A		3.13332	1.51005
P54709	Sodium/potassium-transporting ATPase subunit beta-3	ATP1B3		0	-4.34294e-08
P55036	26S proteasome non-ATPase regulatory subunit 4	PSMD4		1.19321	1.19294
P55060	Exportin-2	CSE1L		0.706858	0.839529
P56385	ATP synthase subunit e, mitochondrial	ATP5I		1.11976	0.924879
P57088	Transmembrane protein 33	TMEM33		0.52238	0.688395
P60201	Myelin proteolipid protein	PLP1		-0.462786	0.185144
P60468	Protein transport protein Sec61 subunit beta	SEC61B		0.311991	0.613916
P60660	Myosin light polypeptide 6	MYL6		1.06405	0.615311
P61353	60S ribosomal protein L27	RPL27		1.17841	1.64278
P61604	10 kDa heat shock protein, mitochondrial	HSPE1		0.498776	0.480984
P61978	Heterogeneous nuclear ribonucleoprotein K	HNRNPK		2.33005	1.07738
P62258	14-3-3 protein epsilon	YWHAE		-0.434139	0.199129
P62269	40S ribosomal protein S18	RPS18		2.12665	1.43375
P62316	Small nuclear ribonucleoprotein Sm D2	SNRPD2		1.14541	0.690015
P62491;Q15907	Ras-related protein Rab-11A;Ras-related protein Rab-11B	RAB11A;RAB11B		0.681376	0.759936
P62805	Histone H4	HIST1H4A		0.179949	0.380328
P62873;Q9HAV0	Guanine nucleotide-binding protein G(I)/G(S)/G(T) subunit beta-1;Guanine nucleotide-binding protein subunit beta-4	GNB1;GNB4		0.548691	0.749294
P62917	60S ribosomal protein L8	RPL8		1.57658	1.43307
P63261;P60709	Actin, cytoplasmic 2;Actin, cytoplasmic 2, N-terminally processed;Actin, cytoplasmic 1;Actin, cytoplasmic 1, N-terminally processed	ACTG1;ACTB		-0.281949	0.0146102
P68104;Q5VTE0;Q05639	Elongation factor 1-alpha 1;Putative elongation factor 1-alpha-like 3;Elongation factor 1-alpha 2	EEF1A1;EEF1A1P5;EEF1A2		0.207472	1.00653
P68371	Tubulin beta-4B chain	TUBB4B		0.235459	0.768968
P78527	DNA-dependent protein kinase catalytic subunit	PRKDC		-0.468694	0.116654
P81605	Dermcidin;Survival-promoting peptide;DCD-1	DCD		0.253884	0.377007
P84090	Enhancer of rudimentary homolog	ERH		0.284508	0.438947
Q00325	Phosphate carrier protein, mitochondrial	SLC25A3		0.820563	0.571312
Q01804	OTU domain-containing protein 4	OTUD4		0.639157	0.944901
Q06830	Peroxiredoxin-1	PRDX1		0.307526	0.793882
Q07065	Cytoskeleton-associated protein 4	CKAP4		0	-4.34294e-08
Q08378	Golgin subfamily A member 3	GOLGA3		-2.28917	0.00645956
Q13347	Eukaryotic translation initiation factor 3 subunit I	EIF3I		1.09612	1.22348
Q14974	Importin subunit beta-1	KPNB1		2.15846	1.22411
Q15155;P69849;Q5JPE7	Nodal modulator 1;Nodal modulator 3;Nodal modulator 2	NOMO1;NOMO3;NOMO2		0.610112	0.811552
Q16555	Dihydropyrimidinase-related protein 2	DPYSL2		0.465878	0.622543
Q16637	Survival motor neuron protein	SMN1		0	-4.34294e-08
Q5SWX8	Protein odr-4 homolog	ODR4		1.26808	0.949401
Q5T749	Keratinocyte proline-rich protein	KPRP		0	-4.34294e-08
Q5W0B1	RING finger protein 219	RNF219		0.239104	0.670631
Q6N021	Methylcytosine dioxygenase TET2	TET2		1.2499	0.794805
Q7Z353	Highly divergent homeobox	HDX		2.56921	1.55029
Q8N1I0	Dedicator of cytokinesis protein 4	DOCK4		0.573445	1.11353
Q8WXF1	Paraspeckle component 1	PSPC1		1.7785	1.07409
Q8WZA9	Immunity-related GTPase family Q protein	IRGQ		-1.63505	0.0161178
Q93100	Phosphorylase b kinase regulatory subunit beta	PHKB		0.426147	1.20233
Q96AG4	Leucine-rich repeat-containing protein 59	LRRC59		-0.671784	0.113533
Q96JJ3	Engulfment and cell motility protein 2	ELMO2		0.888199	0.763988
Q99417	C-Myc-binding protein	MYCBP		0.449598	0.67362
Q99623	Prohibitin-2	PHB2		0.469105	0.677272
Q9BQA1	Methylosome protein 50	WDR77		1.09028	1.62146
Q9BRS2	Serine/threonine-protein kinase RIO1	RIOK1		0.852901	1.27978
Q9BUA3	Uncharacterized protein C11orf84	C11orf84		0.409086	0.798768
Q9BVA1	Tubulin beta-2B chain	TUBB2B		0	-4.34294e-08
Q9H3K6	BolA-like protein 2	BOLA2		0.528737	1.29414
Q9H9B4	Sideroflexin-1	SFXN1		1.53422	0.953708
Q9NX63	MICOS complex subunit MIC19	CHCHD3		0.675552	0.708977
Q9NYF8	Bcl-2-associated transcription factor 1	BCLAF1		0.877577	0.697748
Q9NZT1	Calmodulin-like protein 5	CALML5		-0.0357641	0.292492
Q9UH99	SUN domain-containing protein 2	SUN2		0.727869	0.884639
Q9UJZ1	Stomatin-like protein 2, mitochondrial	STOML2		0.394048	0.545963
Q9UPQ9	Trinucleotide repeat-containing gene 6B protein	TNRC6B		1.74845	1.54663
Q9UQ35	Serine/arginine repetitive matrix protein 2	SRRM2		0.615377	1.09367
Q9Y230	RuvB-like 2	RUVBL2		0.870408	0.576548
Q9Y265	RuvB-like 1	RUVBL1		-0.0555611	0.282827
Q9Y2H1	Serine/threonine-protein kinase 38-like	STK38L		1.55033	0.803589
Q9Y2W1	Thyroid hormone receptor-associated protein 3	THRAP3		-0.106494	0.204976
Q9Y657	Spindlin-1	SPIN1		-0.0651334	0.224844
Q9Y678	Coatomer subunit gamma-1	COPG1		0	-4.34294e-08

## Sheet: Raw Data
Protein names	Gene names	Student's T-test Significant 1621_mut_Empvec	Log2 Fold change 1621_mut_Empvec	p-value of fold change 1621_mut_Empvec	GOBP name	GOMF name	GOCC name	Majority protein IDs	Intensity	Student's T-test q-value 1621_mut_Empvec	Student's T-test Test statistic 1621_mut_Empvec	Protein IDs	Protein names	Gene names	LFQ intensity 1621_mut_1	LFQ intensity 1621_mut_2	LFQ intensity 1621_mut_3	LFQ intensity 1621_wt-1	LFQ intensity 1621_wt-2	LFQ intensity 1621_wt-3	LFQ intensity 2529_wt_1	LFQ intensity 2529_wt_2	LFQ intensity 2529_wt_3	LFQ intensity 2529_mut_1	LFQ intensity 2529_mut_2	LFQ intensity 2529_mut_3	LFQ intensity Empvec_1	LFQ intensity Empvec_2	LFQ intensity Empvec_3	Peptides	Razor + unique peptides	Unique peptides	Sequence coverage [%]	Unique + razor sequence coverage [%]	Unique sequence coverage [%]	Mol. weight [kDa]	Q-value	Score	MS/MS count
CCR4-NOT transcription complex subunit 1	CNOT1	+	1.38478	1.87318	biological regulation;biosynthetic process;catabolic process;cellular biosynthetic process;cellular catabolic process;cellular macromolecule biosynthetic process;cellular macromolecule catabolic process;cellular macromolecule metabolic process;cellular metabolic process;cellular nitrogen compound metabolic process;cellular process;developmental process;gene expression;gene silencing;gene silencin…	armadillo repeat domain binding;binding;estrogen receptor binding;hormone receptor binding;nuclear hormone receptor binding;protein binding;protein complex scaffold;protein domain specific binding;receptor binding;retinoic acid receptor binding;steroid hormone receptor binding;structural molecule activity;transcription factor binding	CCR4-NOT complex;cell part;cytoplasmic mRNA processing body;cytoplasmic part;cytosol;extracellular region part;extracellular space;intracellular membrane-bounded organelle;intracellular non-membrane-bounded organelle;intracellular organelle;intracellular organelle part;intracellular part;macromolecular complex;membrane;membrane-bounded organelle;microbody;microbody membrane;microbody part;non-mem…	A5YKK6	36590000	0.00921739	3.4199	A5YKK6	CCR4-NOT transcription complex subunit 1	CNOT1	22.5111	22.0438	22.1285	22.2426	22.0199	21.8957	19.3206	21.358	20.8046	21.3287	20.4811	20.0704	20.562	20.3748	21.5924	7	7	7	3.1	3.1	3.1	266.94	0	45.853	23
Membrane-associated progesterone receptor component 1	PGRMC1	+	3.26814	1.93186	axon guidance;chemotaxis;locomotion;response to chemical stimulus;response to external stimulus;response to stimulus;taxis	binding;cation binding;heme binding;ion binding;iron ion binding;lipid binding;metal ion binding;steroid binding;tetrapyrrole binding;transition metal ion binding	cell part;cytoplasmic part;endoplasmic reticulum;endoplasmic reticulum membrane;endoplasmic reticulum part;extracellular membrane-bounded organelle;extracellular organelle;extracellular region part;extracellular vesicular exosome;integral to membrane;intracellular membrane-bounded organelle;intracellular non-membrane-bounded organelle;intracellular organelle;intracellular organelle part;intracell…	O00264	176530000	0.00854545	3.56896	O00264	Membrane-associated progesterone receptor component 1	PGRMC1	24.3123	24.4384	24.2342	23.801	23.9044	23.8065	23.2241	23.4172	24.7147	24.1154	24.079	23.386	20.4764	19.8522	22.8518	8	8	7	25.1	25.1	20.5	21.671	0	92.682	43
Protein arginine N-methyltransferase 5;Protein arginine N-methyltransferase 5, N-terminally processed	PRMT5	+	0.385663	1.1294	biological regulation;biosynthetic process;cell activation;cell proliferation;cellular biosynthetic process;cellular component assembly;cellular component assembly at cellular level;cellular component organization;cellular component organization at cellular level;cellular component organization or biogenesis;cellular component organization or biogenesis at cellular level;cellular macromolecular c…	arginine N-methyltransferase activity;binding;catalytic activity;chromatin binding;core promoter binding;core promoter sequence-specific DNA binding;DNA binding;histone methyltransferase activity;histone-arginine N-methyltransferase activity;methyltransferase activity;N-methyltransferase activity;nucleic acid binding;protein binding;protein binding transcription factor activity;protein dimerizati…	cell part;cytoplasm;cytoplasmic part;cytosol;intracellular membrane-bounded organelle;intracellular organelle;intracellular organelle part;intracellular part;macromolecular complex;membrane-bounded organelle;methylosome;methyltransferase complex;nuclear part;nucleoplasm;nucleus;organelle;organelle part;protein complex	O14744	20012000000	0.048	1.78701	O14744	Protein arginine N-methyltransferase 5;Protein arginine N-methyltransferase 5, N-terminally processed	PRMT5	31.1244	30.8244	30.9039	30.4905	30.5822	30.5649	30.4386	30.5319	30.6429	30.9482	30.5467	30.4176	30.694	30.1797	30.8221	35	35	35	52.4	52.4	52.4	72.683	0	323.31	528
UDP-N-acetylglucosamine--peptide N-acetylglucosaminyltransferase 110 kDa subunit	OGT	+	0.680894	1.51198	apoptosis;biological regulation;carbohydrate metabolic process;cell communication;cell death;cellular carbohydrate metabolic process;cellular component organization;cellular component organization at cellular level;cellular component organization or biogenesis;cellular component organization or biogenesis at cellular level;cellular macromolecule metabolic process;cellular metabolic process;cellul…	acetylglucosaminyltransferase activity;binding;catalytic activity;enzyme activator activity;enzyme regulator activity;lipid binding;phosphatidylinositol binding;phosphatidylinositol-3,4,5-trisphosphate binding;phospholipid binding;protein N-acetylglucosaminyltransferase activity;transferase activity;transferase activity, transferring glycosyl groups;transferase activity, transferring hexosyl grou…	cell part;cytoplasm;cytoplasmic part;cytoskeletal part;cytosol;histone acetyltransferase complex;histone methyltransferase complex;intracellular membrane-bounded organelle;intracellular organelle;intracellular organelle part;intracellular part;macromolecular complex;membrane;membrane-bounded organelle;methyltransferase complex;microtubule organizing center;mitochondrion;MLL5-L complex;nuclear par…	O15294	272550000	0.0178182	2.57695	O15294	UDP-N-acetylglucosamine--peptide N-acetylglucosaminyltransferase 110 kDa subunit	OGT	24.715	25.1038	24.5947	23.9516	23.1832	23.2691	23.7656	24.5354	24.2529	25.094	24.6551	24.6234	23.739	24.1494	24.4824	19	19	19	19.3	19.3	19.3	116.92	0	323.31	74
Importin-8	IPO8	+	0.847915	2.03339	biological regulation;cellular process;cellular response to stimulus;establishment of localization;establishment of localization in cell;establishment of protein localization;gene expression;intracellular protein transport;intracellular transport;macromolecule metabolic process;metabolic process;protein transport;regulation of biological process;regulation of cellular process;response to stimulus…	binding;enzyme binding;GTPase binding;protein binding;Ran GTPase binding;Ras GTPase binding;small GTPase binding	cell part;cytoplasmic part;cytosol;intracellular organelle part;intracellular part;nuclear part;nucleoplasm;organelle part	O15397	907610000	0.00964103	3.83617	O15397	Importin-8	IPO8	26.6699	26.5972	26.8383	26.5006	26.3768	26.5965	25.3713	25.4684	26.2227	26.1821	25.6658	25.7438	26.1459	25.4485	25.9673	23	23	22	25	25	24	119.94	0	323.31	167
D-3-phosphoglycerate dehydrogenase	PHGDH	+	0.854155	1.60882	amine biosynthetic process;amine metabolic process;anatomical structure development;aspartate family amino acid metabolic process;biological regulation;biosynthetic process;brain development;carboxylic acid biosynthetic process;carboxylic acid metabolic process;cell cycle arrest;cell cycle process;cell development;cell projection organization;cellular amine metabolic process;cellular amino acid b…	binding;catalytic activity;coenzyme binding;cofactor binding;electron carrier activity;NAD binding;nucleotide binding;oxidoreductase activity;oxidoreductase activity, acting on CH-OH group of donors;oxidoreductase activity, acting on the CH-OH group of donors, NAD or NADP as acceptor;phosphoglycerate dehydrogenase activity	cell part;cytoplasmic part;cytosol;extracellular membrane-bounded organelle;extracellular organelle;extracellular region part;extracellular vesicular exosome;intracellular part;membrane-bounded organelle;membrane-bounded vesicle;organelle;vesicle	O43175	391210000	0.0165217	2.79167	O43175	D-3-phosphoglycerate dehydrogenase	PHGDH	25.2194	25.8375	25.0927	24.7952	24.6706	24.4319	24.3474	24.6578	24.7923	24.8123	24.8553	24.9119	24.5478	24.1707	24.8687	16	16	16	34.5	34.5	34.5	56.65	0	256.21	114
Protein phosphatase 1B	PPM1B	+	1.03495	1.86319	biological regulation;biosynthetic process;cell cycle arrest;cell cycle process;cell surface receptor linked signaling pathway;cellular biosynthetic process;cellular macromolecule biosynthetic process;cellular macromolecule metabolic process;cellular metabolic process;cellular nitrogen compound metabolic process;cellular process;cellular protein metabolic process;cellular response to chemical sti…	binding;calcium-dependent protein serine/threonine phosphatase activity;calmodulin-dependent protein phosphatase activity;catalytic activity;cation binding;hydrolase activity;hydrolase activity, acting on ester bonds;ion binding;magnesium ion binding;manganese ion binding;metal ion binding;molecular transducer activity;phosphatase activity;phosphoprotein phosphatase activity;phosphoric ester hydr…	calcium channel complex;cation channel complex;cell part;cell projection;cytoplasmic part;cytosol;intracellular membrane-bounded organelle;intracellular organelle;intracellular organelle part;intracellular part;ion channel complex;macromolecular complex;membrane;membrane part;membrane-bounded organelle;neuron projection;nuclear part;nucleoplasm;nucleus;organelle;organelle part;plasma membrane par…	O75688	335950000	0.0100426	3.39492	O75688;P35813	Protein phosphatase 1B	PPM1B	24.8631	25.2725	24.9247	24.2833	24.1292	24.2585	24.3211	24.4114	25.1771	25.2185	24.8493	24.9419	23.4772	24.048	24.4303	15	15	15	38.2	38.2	38.2	52.642	0	323.31	85
ATP synthase subunit d, mitochondrial	ATP5H	+	1.0773	3.62103	ATP biosynthetic process;ATP metabolic process;ATP synthesis coupled proton transport;biosynthetic process;cation transport;cellular biosynthetic process;cellular metabolic process;cellular nitrogen compound biosynthetic process;cellular nitrogen compound metabolic process;cellular process;electron transport chain;energy coupled proton transport, down electrochemical gradient;establishment of loc…	cation transmembrane transporter activity;hydrogen ion transmembrane transporter activity;inorganic cation transmembrane transporter activity;ion transmembrane transporter activity;monovalent inorganic cation transmembrane transporter activity;substrate-specific transmembrane transporter activity;substrate-specific transporter activity;transmembrane transporter activity;transporter activity	cell part;cytoplasm;cytoplasmic part;extracellular membrane-bounded organelle;extracellular organelle;extracellular region part;extracellular vesicular exosome;intracellular membrane-bounded organelle;intracellular organelle;intracellular organelle part;intracellular part;macromolecular complex;membrane;membrane part;membrane-bounded organelle;membrane-bounded vesicle;mitochondrial inner membrane…	O75947	371300000	0	10.4229	O75947	ATP synthase subunit d, mitochondrial	ATP5H	25.3264	25.1788	25.4818	25.0784	24.7717	25.0187	24.0092	24.86	25.0923	24.7735	24.8814	24.739	24.3485	24.1579	24.2487	9	9	9	65.8	65.8	65.8	18.491	0	121.86	68
NADH-cytochrome b5 reductase 3;NADH-cytochrome b5 reductase 3 membrane-bound form;NADH-cytochrome b5 reductase 3 soluble form	CYB5R3	+	1.31803	1.45127	alcohol metabolic process;biosynthetic process;blood circulation;carboxylic acid metabolic process;cellular ketone metabolic process;cellular metabolic process;cellular process;cholesterol biosynthetic process;cholesterol metabolic process;circulatory system process;L-ascorbic acid metabolic process;lipid biosynthetic process;lipid metabolic process;metabolic process;multicellular organismal proc…	adenyl nucleotide binding;adenyl ribonucleotide binding;ADP binding;AMP binding;binding;catalytic activity;coenzyme binding;cofactor binding;cytochrome-b5 reductase activity;FAD binding;flavin adenine dinucleotide binding;NAD binding;nucleotide binding;oxidoreductase activity;oxidoreductase activity, acting on NADH or NADPH;oxidoreductase activity, acting on NADH or NADPH, heme protein as accepto…	cell part;cytoplasm;cytoplasmic part;cytosolic part;endoplasmic reticulum;endoplasmic reticulum membrane;endoplasmic reticulum part;extracellular membrane-bounded organelle;extracellular organelle;extracellular region part;extracellular vesicular exosome;hemoglobin complex;intracellular membrane-bounded organelle;intracellular organelle;intracellular organelle part;intracellular part;lipid partic…	P00387	28633000	0.0189756	2.44592	P00387	NADH-cytochrome b5 reductase 3;NADH-cytochrome b5 reductase 3 membrane-bound form;NADH-cytochrome b5 reductase 3 soluble form	CYB5R3	21.9642	21.9241	21.8931	21.8783	20.6284	19.8329	20.8533	21.1117	19.5364	21.6629	20.8321	19.8226	21.6502	20.3272	19.8499	2	2	2	9.3	9.3	9.3	34.234	0	25.696	16
Transferrin receptor protein 1;Transferrin receptor protein 1, serum form	TFRC	+	1.4774	2.24632	biological regulation;cation homeostasis;cation transport;cell differentiation;cellular cation homeostasis;cellular chemical homeostasis;cellular developmental process;cellular homeostasis;cellular ion homeostasis;cellular iron ion homeostasis;cellular metal ion homeostasis;cellular process;cellular response to chemical stimulus;cellular response to drug;cellular response to stimulus;chemical hom…	binding;cargo receptor activity;double-stranded RNA binding;identical protein binding;nucleic acid binding;protein binding;receptor activity;RNA binding;transferrin receptor activity	blood microparticle;cell part;cell surface;coated pit;cytoplasmic membrane-bounded vesicle;cytoplasmic part;cytoplasmic vesicle;endosome;external side of plasma membrane;extracellular membrane-bounded organelle;extracellular organelle;extracellular region;extracellular region part;extracellular space;extracellular vesicular exosome;integral to membrane;integral to plasma membrane;intracellular me…	P02786	26970000	0.0097931	4.43902	P02786	Transferrin receptor protein 1;Transferrin receptor protein 1, serum form	TFRC	21.9177	21.9723	21.571	21.4272	21.4248	21.5173	20.3932	21.0475	20.0973	21.2051	19.8214	20.9227	20.2738	19.8471	20.908	7	7	7	10.7	10.7	10.7	84.87	0	71.616	15
Dolichyl-diphosphooligosaccharide--protein glycosyltransferase subunit 1	RPN1	+	2.95135	1.73929	biosynthetic process;carbohydrate metabolic process;cellular biosynthetic process;cellular carbohydrate metabolic process;cellular macromolecule biosynthetic process;cellular macromolecule metabolic process;cellular metabolic process;cellular process;cellular protein metabolic process;cotranslational protein targeting to membrane;establishment of localization;establishment of localization in cell…	catalytic activity;dolichyl-diphosphooligosaccharide-protein glycotransferase activity;oligosaccharyl transferase activity;transferase activity;transferase activity, transferring glycosyl groups;transferase activity, transferring hexosyl groups	cell part;cytoplasmic membrane-bounded vesicle;cytoplasmic part;cytoplasmic vesicle;endoplasmic reticulum;endoplasmic reticulum membrane;endoplasmic reticulum part;integral to membrane;intracellular membrane-bounded organelle;intracellular organelle;intracellular organelle part;intracellular part;intrinsic to membrane;macromolecular complex;melanosome;membrane;membrane part;membrane-bounded organ…	P04843	108680000	0.0126545	3.09342	P04843	Dolichyl-diphosphooligosaccharide--protein glycosyltransferase subunit 1	RPN1	23.8355	23.4164	23.7347	23.357	22.8519	23.3313	22.5333	22.8315	23.3547	23.2106	22.6555	23.2316	20.3105	19.3101	22.5118	9	9	9	18.6	18.6	18.6	68.569	0	247.05	49
ADP/ATP translocase 2;ADP/ATP translocase 2, N-terminally processed	SLC25A5	+	1.12574	1.98424	adenine transport;biological regulation;cellular metabolic process;cellular process;chromosome segregation;energy derivation by oxidation of organic compounds;energy reserve metabolic process;establishment of localization;generation of precursor metabolites and energy;metabolic process;nitrogen compound transport;nucleobase transport;nucleobase-containing compound transport;oxidation-reduction pr…	adenine transmembrane transporter activity;binding;enzyme binding;nucleobase transmembrane transporter activity;nucleobase-containing compound transmembrane transporter activity;protein binding;purine base transmembrane transporter activity;substrate-specific transmembrane transporter activity;substrate-specific transporter activity;transmembrane transporter activity;transporter activity;ubiquiti…	cell part;cell projection;cilium;cytoplasmic part;cytoskeletal part;extracellular membrane-bounded organelle;extracellular organelle;extracellular region part;extracellular vesicular exosome;integral to membrane;integral to plasma membrane;intracellular membrane-bounded organelle;intracellular non-membrane-bounded organelle;intracellular organelle;intracellular organelle part;intracellular part;i…	P05141	1347100000	0.00895238	3.70529	P05141;Q9H0C2	ADP/ATP translocase 2;ADP/ATP translocase 2, N-terminally processed	SLC25A5	27.0267	26.9292	27.2468	27.11	27.038	27.6871	25.4875	26.5416	26.5567	26.5454	26.307	25.9978	26.2364	25.364	26.225	20	20	8	55	55	24.8	32.852	0	323.31	126
ATP synthase subunit beta, mitochondrial	ATP5B	+	1.28489	3.13081	anatomical structure formation involved in morphogenesis;angiogenesis;ATP biosynthetic process;ATP hydrolysis coupled proton transport;ATP metabolic process;ATP synthesis coupled proton transport;biological regulation;biosynthetic process;cation homeostasis;cation transport;cell differentiation;cellular biosynthetic process;cellular cation homeostasis;cellular chemical homeostasis;cellular compon…	active transmembrane transporter activity;adenyl nucleotide binding;adenyl ribonucleotide binding;ATP binding;ATPase activity;ATPase activity, coupled;ATPase activity, coupled to movement of substances;ATPase activity, coupled to transmembrane movement of ions;ATPase activity, coupled to transmembrane movement of substances;binding;catalytic activity;cation transmembrane transporter activity;cati…	cell part;cell surface;cytoplasmic part;extracellular membrane-bounded organelle;extracellular organelle;extracellular region part;extracellular vesicular exosome;intracellular membrane-bounded organelle;intracellular non-membrane-bounded organelle;intracellular organelle;intracellular organelle lumen;intracellular organelle part;intracellular part;macromolecular complex;membrane;membrane part;me…	P06576	905300000	0.0085	7.7688	P06576	ATP synthase subunit beta, mitochondrial	ATP5B	26.6147	26.6833	26.4538	25.4633	25.36	25.7174	25.7451	26.2709	26.5789	26.4746	26.1845	26.3989	25.5284	25.0148	25.3539	19	19	19	54.8	54.8	54.8	56.559	0	323.31	186
Nucleophosmin	NPM1	+	3.07688	2.89925	aging;ATP-dependent chromatin remodeling;biological regulation;cell aging;cell cycle process;cellular component assembly;cellular component assembly at cellular level;cellular component organization;cellular component organization at cellular level;cellular component organization or biogenesis;cellular component organization or biogenesis at cellular level;cellular macromolecular complex assembly…	binding;enzyme binding;enzyme inhibitor activity;enzyme regulator activity;histone binding;identical protein binding;kinase binding;kinase inhibitor activity;kinase regulator activity;NF-kappaB binding;nucleic acid binding;protein binding;protein binding transcription factor activity;protein dimerization activity;protein heterodimerization activity;protein homodimerization activity;protein kinase…	adherens junction;anchoring junction;cell junction;cell part;cell-substrate adherens junction;cell-substrate junction;centrosome;cytoplasm;cytoplasmic part;cytoskeletal part;cytosol;focal adhesion;intracellular membrane-bounded organelle;intracellular non-membrane-bounded organelle;intracellular organelle;intracellular organelle part;intracellular part;macromolecular complex;membrane;membrane-bou…	P06748	102710000	0.00618182	6.74226	P06748	Nucleophosmin	NPM1	23.0514	24.0743	22.949	22.4116	22.7274	20.4444	23.1247	22.7784	23.6736	23.0137	23.6266	23.2849	19.7247	20.4879	20.6315	5	5	5	14.3	14.3	14.3	32.575	0	139.8	16
Tubulin beta chain	TUBB	+	1.02077	2.62598	biological regulation;cell cycle;cell cycle process;cell division;cell killing;cellular component assembly;cellular component assembly at cellular level;cellular component movement;cellular component organization;cellular component organization at cellular level;cellular component organization or biogenesis;cellular component organization or biogenesis at cellular level;cellular macromolecular co…	binding;catalytic activity;enzyme binding;GTP binding;GTPase activity;guanyl nucleotide binding;guanyl ribonucleotide binding;hydrolase activity;hydrolase activity, acting on acid anhydrides;hydrolase activity, acting on acid anhydrides, in phosphorus-containing anhydrides;MHC class I protein binding;MHC protein binding;nucleoside-triphosphatase activity;nucleotide binding;protein binding;purine …	cell body;cell part;cytoplasm;cytoplasmic part;cytoskeletal part;cytoskeleton;cytosol;extracellular membrane-bounded organelle;extracellular organelle;extracellular region part;extracellular vesicular exosome;intracellular membrane-bounded organelle;intracellular non-membrane-bounded organelle;intracellular organelle;intracellular organelle part;intracellular part;macromolecular complex;membrane-…	P07437	399580000	0.004	5.68324	P07437;A6NNZ2;CON__ENSEMBL:ENSBTAP00000025008;Q9H4B7	Tubulin beta chain	TUBB	25.4483	25.6263	25.163	24.2943	24.2384	24.1861	24.5439	24.558	24.9513	24.9193	24.8936	25.3007	24.6143	24.2098	24.3511	20	5	4	45.9	14.2	10.8	49.67	0	186.28	58
Heterogeneous nuclear ribonucleoproteins C1/C2;Heterogeneous nuclear ribonucleoprotein C-like 4;Heterogeneous nuclear ribonucleoprotein C-like 1;Heterogeneous nuclear ribonucleoprotein C-like 3;Heterogeneous nuclear ribonucleoprotein C-like 2	HNRNPC;HNRNPCL4;HNRNPCL1;HNRNPCL3;HNRNPCL2	+	1.13615	2.04998	3'-UTR-mediated mRNA stabilization;ATP-dependent chromatin remodeling;biological regulation;cell differentiation;cellular component organization;cellular component organization at cellular level;cellular component organization or biogenesis;cellular component organization or biogenesis at cellular level;cellular developmental process;cellular macromolecule metabolic process;cellular metabolic pro…	binding;chromatin binding;chromatin DNA binding;core promoter proximal region DNA binding;core promoter proximal region sequence-specific DNA binding;DNA binding;enhancer binding;enhancer sequence-specific DNA binding;identical protein binding;mRNA 3'-UTR binding;mRNA binding;nucleic acid binding;nucleosomal DNA binding;nucleosome binding;nucleotide binding;poly(U) RNA binding;poly-pyrimidine tra…	catalytic step 2 spliceosome;cell part;chromatin;chromosomal part;cytoplasmic part;cytosol;extracellular membrane-bounded organelle;extracellular organelle;extracellular region part;extracellular vesicular exosome;intracellular membrane-bounded organelle;intracellular organelle;intracellular organelle part;intracellular part;macromolecular complex;membrane;membrane-bounded organelle;membrane-boun…	P07910;P0DMR1;O60812;B7ZW38;B2RXH8	136780000	0.00897297	3.88103	P07910;P0DMR1;O60812;B7ZW38;B2RXH8;Q86SE5	Heterogeneous nuclear ribonucleoproteins C1/C2;Heterogeneous nuclear ribonucleoprotein C-like 4;Heterogeneous nuclear ribonucleoprotein C-like 1;Heterogeneous nuclear ribonucleoprotein C-like 3;Heterogeneous nuclear ribonucleoprotein C-like 2	HNRNPC;HNRNPCL4;HNRNPCL1;HNRNPCL3;HNRNPCL2	23.5988	23.36	23.9399	22.6967	22.5888	22.5809	23.2123	23.6674	23.6023	25.3479	24.197	23.9003	22.9723	22.3089	22.209	10	10	10	24.5	24.5	24.5	33.67	0	91.248	31
4F2 cell-surface antigen heavy chain	SLC3A2	+	1.50342	3.28306	amine transport;amino acid import;amino acid transport;aromatic amino acid transport;biological regulation;blood coagulation;branched-chain aliphatic amino acid transport;calcium ion transport;carbohydrate metabolic process;carboxylic acid transport;cation transport;cell growth;cell migration;cell motility;cellular component movement;cellular process;coagulation;divalent inorganic cation transpor…	active transmembrane transporter activity;amine transmembrane transporter activity;amino acid transmembrane transporter activity;antiporter activity;binding;calcium ion transmembrane transporter activity;calcium:cation antiporter activity;calcium:sodium antiporter activity;carboxylic acid transmembrane transporter activity;catalytic activity;cation binding;cation transmembrane transporter activit…	apical plasma membrane;cell part;cell surface;cytoplasm;cytoplasmic membrane-bounded vesicle;cytoplasmic part;cytoplasmic vesicle;extracellular membrane-bounded organelle;extracellular organelle;extracellular region part;extracellular vesicular exosome;integral to membrane;intracellular membrane-bounded organelle;intracellular organelle;intracellular organelle part;intracellular part;intrinsic to…	P08195	44386000	0.0113333	8.51772	P08195	4F2 cell-surface antigen heavy chain	SLC3A2	22.6897	22.2282	22.5511	21.7631	21.8783	22.7494	19.814	21.3645	19.2985	22.071	21.8758	21.6754	21.2089	20.8605	20.8894	6	6	6	11.9	11.9	11.9	67.993	0	87.43	16
Ubiquitin-60S ribosomal protein L40;Ubiquitin;60S ribosomal protein L40;Ubiquitin-40S ribosomal protein S27a;Ubiquitin;40S ribosomal protein S27a;Polyubiquitin-B;Ubiquitin;Polyubiquitin-C;Ubiquitin	UBA52;RPS27A;UBB;UBC	+	2.33939	3.87263	activation of immune response;activation of innate immune response;activation of MAPK activity;adipose tissue development;alcohol metabolic process;anaphase-promoting complex-dependent proteasomal ubiquitin-dependent protein catabolic process;anatomical structure development;anatomical structure morphogenesis;antigen processing and presentation;antigen processing and presentation of exogenous ant…	binding;cation binding;enzyme binding;ion binding;metal ion binding;protease binding;protein binding;structural constituent of ribosome;structural molecule activity	cell body;cell part;cell projection;cytoplasm;cytoplasmic part;cytoplasmic vesicle membrane;cytoplasmic vesicle part;cytosol;cytosolic large ribosomal subunit;cytosolic small ribosomal subunit;endocytic vesicle membrane;endosomal part;endosome membrane;extracellular membrane-bounded organelle;extracellular organelle;extracellular region part;extracellular vesicular exosome;intracellular membrane-…	P62987;P62979;P0CG47;P0CG48	714710000	0	12.0935	P62987;P62979;P0CG47;P0CG48	Ubiquitin-60S ribosomal protein L40;Ubiquitin;60S ribosomal protein L40;Ubiquitin-40S ribosomal protein S27a;Ubiquitin;40S ribosomal protein S27a;Polyubiquitin-B;Ubiquitin;Polyubiquitin-C;Ubiquitin	UBA52;RPS27A;UBB;UBC	24.9389	25.3945	25.4021	23.7832	23.2541	23.9233	24.007	23.2316	21.2682	28.5076	28.0722	27.6447	23.0566	22.6728	22.988	6	6	6	38.3	38.3	38.3	14.728	0	252.64	72
Heat shock 70 kDa protein 1B;Heat shock 70 kDa protein 1A	HSPA1B;HSPA1A	+	1.84356	1.40155				P0DMV9;P0DMV8	558990000	0.0196706	2.34046	P0DMV9;P0DMV8	Heat shock 70 kDa protein 1B;Heat shock 70 kDa protein 1A	HSPA1B;HSPA1A	25.6122	26.4762	25.2337	24.8481	24.525	24.537	25.5406	25.6612	25.5813	26.0674	25.885	25.9328	24.7066	22.5404	24.5443	28	23	13	43.2	38.8	24.3	70.051	0	292.69	112
60 kDa heat shock protein, mitochondrial	HSPD1	+	2.48738	1.27681	activation of caspase activity;activation of immune response;activation of innate immune response;adaptive immune response;adaptive immune response based on somatic recombination of immune receptors built from immunoglobulin superfamily domains;B cell activation;B cell activation involved in immune response;B cell cytokine production;B cell mediated immunity;B cell proliferation;biological regula…	adenyl nucleotide binding;adenyl ribonucleotide binding;ATP binding;ATPase activity;binding;catalytic activity;chaperone binding;DNA binding;DNA replication origin binding;double-stranded RNA binding;enzyme binding;hydrolase activity;hydrolase activity, acting on acid anhydrides;hydrolase activity, acting on acid anhydrides, in phosphorus-containing anhydrides;lipopolysaccharide binding;nucleic a…	cell part;cell surface;coated pit;coated vesicle;cytoplasm;cytoplasmic membrane-bounded vesicle;cytoplasmic part;cytoplasmic vesicle;cytosol;early endosome;endosome;extracellular membrane-bounded organelle;extracellular organelle;extracellular region part;extracellular space;extracellular vesicular exosome;intracellular membrane-bounded organelle;intracellular organelle;intracellular organelle lu…	P10809	140670000	0.0268632	2.0824	P10809	60 kDa heat shock protein, mitochondrial	HSPD1	23.1228	24.8734	23.6334	22.7779	22.422	22.9551	22.7885	23.3344	23.3115	23.611	23.6381	23.3495	22.8936	19.3057	21.9683	17	17	17	35.1	35.1	35.1	61.054	0	162.38	48
Heat shock cognate 71 kDa protein	HSPA8	+	0.836873	2.08896	anatomical structure development;axon guidance;biological regulation;biosynthetic process;cell communication;cell cycle phase;cell cycle process;cell development;cell-cell signaling;cellular biosynthetic process;cellular component disassembly;cellular component disassembly at cellular level;cellular component organization;cellular component organization at cellular level;cellular component organi…	adenyl nucleotide binding;adenyl ribonucleotide binding;antigen binding;ATP binding;ATPase activity;ATPase activity, coupled;binding;C3HC4-type RING finger domain binding;catalytic activity;enzyme binding;glycolipid binding;G-protein-coupled receptor binding;heat shock protein binding;hydrolase activity;hydrolase activity, acting on acid anhydrides;hydrolase activity, acting on acid anhydrides, i…	adherens junction;anchoring junction;blood microparticle;cell junction;cell part;cell surface;cell-substrate adherens junction;cell-substrate junction;chromosomal part;clathrin coated vesicle membrane;clathrin sculpted gamma-aminobutyric acid transport vesicle membrane;coated vesicle membrane;cytoplasmic membrane-bounded vesicle;cytoplasmic part;cytoplasmic vesicle;cytoplasmic vesicle membrane;cy…	P11142	1907700000	0.00948571	3.98775	P11142;P54652	Heat shock cognate 71 kDa protein	HSPA8	27.4159	27.7437	27.2278	26.6656	26.4809	26.6326	27.0064	27.3559	27.5438	27.7398	27.6518	27.663	26.8891	26.385	26.6027	34	34	25	50.8	50.8	42.4	70.897	0	323.31	299
Polyadenylate-binding protein 1	PABPC1	+	2.74114	2.01239	biological regulation;biosynthetic process;catabolic process;cell maturation;cellular biosynthetic process;cellular catabolic process;cellular developmental process;cellular macromolecule biosynthetic process;cellular macromolecule catabolic process;cellular macromolecule metabolic process;cellular metabolic process;cellular nitrogen compound metabolic process;cellular process;cellular process in…	binding;mRNA binding;nucleic acid binding;nucleotide binding;poly(A) RNA binding;poly(U) RNA binding;poly-purine tract binding;poly-pyrimidine tract binding;protein binding;protein C-terminus binding;RNA binding;single-stranded RNA binding;translation activator activity;translation regulator activity;translation regulator activity, nucleic acid binding	adherens junction;anchoring junction;catalytic step 2 spliceosome;cell junction;cell part;cell-substrate adherens junction;cell-substrate junction;cytoplasm;cytoplasmic part;cytosol;extracellular membrane-bounded organelle;extracellular organelle;extracellular region part;extracellular vesicular exosome;focal adhesion;intracellular membrane-bounded organelle;intracellular non-membrane-bounded org…	P11940	256290000	0.0094	3.77991	P11940;Q9H361;Q4VXU2;Q5JQF8;P0CB38;Q96DU9	Polyadenylate-binding protein 1	PABPC1	24.1253	24.3911	23.9522	23.5253	22.3922	23.1366	24.738	24.8826	23.2225	25.9276	25.8721	25.6165	21.8305	20.0244	22.3903	17	17	10	29.2	29.2	16.8	70.67	0	244.13	78
Proliferating cell nuclear antigen	PCNA	+	1.84716	2.34699	anatomical structure development;anatomical structure homeostasis;base-excision repair;biological regulation;biosynthetic process;cell cycle;cell cycle process;cell differentiation;cell proliferation;cellular biosynthetic process;cellular component organization;cellular component organization at cellular level;cellular component organization or biogenesis;cellular component organization or biogen…	binding;catalytic activity;chromatin binding;damaged DNA binding;dinucleotide insertion or deletion binding;DNA binding;DNA insertion or deletion binding;DNA N-glycosylase activity;DNA polymerase binding;DNA polymerase processivity factor activity;double-stranded DNA binding;enzyme binding;enzyme regulator activity;histone acetyltransferase binding;hydrolase activity;hydrolase activity, acting on…	cell part;centrosome;chromosomal part;cytoplasm;cytoplasmic part;cytoskeletal part;DNA replication factor C complex;extracellular membrane-bounded organelle;extracellular organelle;extracellular region part;extracellular vesicular exosome;intracellular membrane-bounded organelle;intracellular non-membrane-bounded organelle;intracellular organelle;intracellular organelle part;intracellular part;ma…	P12004	61416000	0.00656	4.74624	P12004	Proliferating cell nuclear antigen	PCNA	22.5542	23.2703	22.2579	22.5773	21.6209	19.4411	22.2721	22.2898	22.4853	23.0561	22.5825	22.3971	21.3367	20.6627	20.5416	6	6	6	23.8	23.8	23.8	28.768	0	44.993	20
ADP/ATP translocase 3;ADP/ATP translocase 3, N-terminally processed;ADP/ATP translocase 1	SLC25A6;SLC25A4	+	1.15054	2.42365	active induction of host immune response by virus;adenine nucleotide transport;adenine transport;ADP transport;apoptosis;apoptotic mitochondrial changes;ATP transport;biological regulation;cell death;cellular component organization;cellular component organization at cellular level;cellular component organization or biogenesis;cellular component organization or biogenesis at cellular level;cellula…	active transmembrane transporter activity;adenine transmembrane transporter activity;antiporter activity;ATP:ADP antiporter activity;nucleobase transmembrane transporter activity;nucleobase-containing compound transmembrane transporter activity;purine base transmembrane transporter activity;secondary active transmembrane transporter activity;solute:solute antiporter activity;substrate-specific tr…	cell part;cytoplasmic part;integral to membrane;integral to plasma membrane;intracellular membrane-bounded organelle;intracellular organelle;intracellular organelle part;intracellular part;intrinsic to membrane;intrinsic to plasma membrane;macromolecular complex;membrane;membrane part;membrane-bounded organelle;mitochondrial inner membrane;mitochondrial inner membrane presequence translocase comp…	P12236;P12235	47349000	0.00713043	4.99065	P12236;P12235	ADP/ATP translocase 3;ADP/ATP translocase 3, N-terminally processed;ADP/ATP translocase 1	SLC25A6;SLC25A4	22.5541	22.163	22.8096	19.3387	22.278	23.0152	21.1845	22.1905	18.8308	21.9604	21.6065	21.7404	21.095	21.4529	21.5271	14	2	2	41.3	8.1	8.1	32.866	0	22.747	13
Phosphorylase b kinase gamma catalytic chain, liver/testis isoform	PHKG2	+	0.940275	1.60893	alcohol metabolic process;biological regulation;biosynthetic process;carbohydrate biosynthetic process;carbohydrate catabolic process;carbohydrate metabolic process;catabolic process;cellular biosynthetic process;cellular carbohydrate biosynthetic process;cellular carbohydrate catabolic process;cellular carbohydrate metabolic process;cellular glucan metabolic process;cellular macromolecule biosyn…	adenyl nucleotide binding;adenyl ribonucleotide binding;ATP binding;binding;calmodulin-dependent protein kinase activity;catalytic activity;kinase activity;nucleotide binding;phosphorylase kinase activity;phosphotransferase activity, alcohol group as acceptor;protein kinase activity;protein serine/threonine kinase activity;purine nucleotide binding;purine ribonucleoside triphosphate binding;purin…	cell part;cytoplasmic part;cytosol;intracellular part;macromolecular complex;phosphorylase kinase complex;protein complex	P15735	313560000	0.0167647	2.79193	P15735;Q16816	Phosphorylase b kinase gamma catalytic chain, liver/testis isoform	PHKG2	24.8027	25.322	25.1072	24.2906	24.4406	24.0194	23.666	24.2101	24.6464	24.9627	24.5963	24.5659	24.2897	23.556	24.5653	15	15	15	34.7	34.7	34.7	46.442	0	137.31	61
26S protease regulatory subunit 6A	PSMC3	+	1.0968	1.62143	activation of immune response;activation of innate immune response;anaphase-promoting complex-dependent proteasomal ubiquitin-dependent protein catabolic process;anatomical structure development;antigen processing and presentation;antigen processing and presentation of exogenous antigen;antigen processing and presentation of exogenous peptide antigen;antigen processing and presentation of exogeno…	adenyl nucleotide binding;adenyl ribonucleotide binding;ATP binding;ATPase activity;binding;catalytic activity;hydrolase activity;hydrolase activity, acting on acid anhydrides;hydrolase activity, acting on acid anhydrides, in phosphorus-containing anhydrides;nucleoside-triphosphatase activity;nucleotide binding;protein binding;protein binding transcription factor activity;purine nucleotide bindin…	cell part;cytoplasmic mRNA processing body;cytoplasmic part;cytosol;cytosolic part;cytosolic proteasome complex;intracellular membrane-bounded organelle;intracellular non-membrane-bounded organelle;intracellular organelle;intracellular organelle part;intracellular part;macromolecular complex;membrane;membrane-bounded organelle;non-membrane-bounded organelle;nuclear part;nuclear proteasome complex…	P17980	21135000	0.0172727	2.82018	P17980	26S protease regulatory subunit 6A	PSMC3	21.4032	21.8385	21.2266	21.2021	19.8499	20.5001	20.5579	20.9078	21.4999	21.1691	20.5504	20.1441	20.2761	21.0377	19.8641	2	2	2	7.3	7.3	7.3	49.203	0	46.693	7
T-complex protein 1 subunit alpha	TCP1	+	1.08102	1.19585	binding of sperm to zona pellucida;biological regulation;cell recognition;cell-cell recognition;cellular component assembly;cellular component assembly at cellular level;cellular component organization;cellular component organization at cellular level;cellular component organization or biogenesis;cellular component organization or biogenesis at cellular level;cellular macromolecular complex assem…	adenyl nucleotide binding;adenyl ribonucleotide binding;ATP binding;binding;enzyme binding;nucleotide binding;protein binding;purine nucleotide binding;purine ribonucleoside triphosphate binding;purine ribonucleotide binding;ribonucleotide binding;ubiquitin protein ligase binding;unfolded protein binding	acrosomal vesicle;cell body;cell part;centrosome;chaperonin-containing T-complex;chromatin;chromosomal part;cytoplasmic membrane-bounded vesicle;cytoplasmic part;cytoplasmic vesicle;cytoskeletal part;cytosol;cytosolic part;extracellular membrane-bounded organelle;extracellular organelle;extracellular region part;extracellular vesicular exosome;Golgi apparatus;heterochromatin;intracellular membran…	P17987	25122000	0.0357647	1.9191	P17987	T-complex protein 1 subunit alpha	TCP1	21.5698	21.9815	21.4076	21.2762	21.386	19.042	19.6656	21.212	21.3649	21.4069	20.0579	19.1381	21.1616	21.054	19.5002	9	9	9	16.9	16.9	16.9	60.343	0	60.602	17
ATP synthase-coupling factor 6, mitochondrial	ATP5J	+	2.6412	2.80512	anatomical structure development;ATP biosynthetic process;ATP metabolic process;ATP synthesis coupled proton transport;biosynthetic process;cation transport;cellular biosynthetic process;cellular metabolic process;cellular nitrogen compound biosynthetic process;cellular nitrogen compound metabolic process;cellular process;developmental process;electron transport chain;energy coupled proton transp…	cation transmembrane transporter activity;hydrogen ion transmembrane transporter activity;inorganic cation transmembrane transporter activity;ion transmembrane transporter activity;monovalent inorganic cation transmembrane transporter activity;substrate-specific transmembrane transporter activity;substrate-specific transporter activity;transmembrane transporter activity;transporter activity	cell part;cytoplasmic part;intracellular membrane-bounded organelle;intracellular organelle;intracellular organelle part;intracellular part;macromolecular complex;membrane;membrane part;membrane-bounded organelle;mitochondrial inner membrane;mitochondrial membrane;mitochondrial membrane part;mitochondrial part;mitochondrial proton-transporting ATP synthase complex;mitochondrial proton-transportin…	P18859	125990000	0.00485714	6.36007	P18859	ATP synthase-coupling factor 6, mitochondrial	ATP5J	24.0208	23.6917	24.3126	23.7112	23.3685	23.6902	19.7553	23.4002	23.5289	23.8449	22.7106	20.0448	20.7499	21.3083	22.0433	5	5	5	49.1	49.1	49.1	12.587	0	146.05	29
Cytochrome c oxidase subunit 5A, mitochondrial	COX5A	+	1.13532	3.31226	biosynthetic process;cellular biosynthetic process;cellular macromolecule metabolic process;cellular metabolic process;cellular nitrogen compound metabolic process;cellular process;electron transport chain;gene expression;generation of precursor metabolites and energy;macromolecule metabolic process;metabolic process;nitrogen compound metabolic process;nucleic acid metabolic process;nucleobase-co…	binding;catalytic activity;cation binding;cation transmembrane transporter activity;cytochrome-c oxidase activity;electron carrier activity;heme-copper terminal oxidase activity;hydrogen ion transmembrane transporter activity;inorganic cation transmembrane transporter activity;ion binding;ion transmembrane transporter activity;metal ion binding;monovalent inorganic cation transmembrane transporte…	cell part;cytoplasmic part;extracellular membrane-bounded organelle;extracellular organelle;extracellular region part;extracellular vesicular exosome;intracellular organelle part;intracellular part;membrane;membrane-bounded organelle;membrane-bounded vesicle;mitochondrial inner membrane;mitochondrial membrane;mitochondrial part;organelle;organelle inner membrane;organelle membrane;organelle part;…	P20674	223240000	0.0136	8.66861	P20674	Cytochrome c oxidase subunit 5A, mitochondrial	COX5A	24.4432	24.3754	24.5908	24.1939	24.2801	24.3396	23.183	24.1077	24.1558	23.975	24.072	24.1052	23.215	23.5634	23.2251	5	5	5	26.7	26.7	26.7	16.762	0	53.32	44
Voltage-dependent anion-selective channel protein 1	VDAC1	+	1.62473	2.4365	anion transport;apoptosis;behavior;behavioral defense response;behavioral fear response;cell communication;cell death;cell differentiation;cell-cell signaling;cellular developmental process;cellular process;cognition;death;defense response;developmental process;epithelial cell differentiation;establishment of localization;fear response;ion transport;learning;learning or memory;multicellular organ…	anion channel activity;anion transmembrane transporter activity;binding;channel activity;enzyme binding;gated channel activity;ion channel activity;ion transmembrane transporter activity;kinase binding;passive transmembrane transporter activity;porin activity;protein binding;protein kinase binding;substrate-specific channel activity;substrate-specific transmembrane transporter activity;substrate-…	cell part;cytoplasmic part;extracellular membrane-bounded organelle;extracellular organelle;extracellular region part;extracellular vesicular exosome;intracellular membrane-bounded organelle;intracellular non-membrane-bounded organelle;intracellular organelle;intracellular organelle part;intracellular part;macromolecular complex;membrane;membrane part;membrane-bounded organelle;membrane-bounded v…	P21796	46039000	0.00527273	5.03255	P21796	Voltage-dependent anion-selective channel protein 1	VDAC1	22.4767	22.7344	22.2197	21.9035	19.3807	19.615	22.2632	22.8401	20.7798	22.9618	20.4948	22.3338	20.8154	20.3752	21.366	5	5	5	23.3	23.3	23.3	30.772	0	53.903	18
Tyrosine-protein kinase JAK1	JAK1	+	1.70489	2.05554	actin cytoskeleton organization;actin filament organization;actin filament polymerization;actin filament-based process;actin polymerization or depolymerization;activation of caspase activity;activation of JAK2 kinase activity;activation of Janus kinase activity;activation of MAPKK activity;activation of protein kinase activity;anatomical structure development;anatomical structure morphogenesis;ap…	adenyl nucleotide binding;adenyl ribonucleotide binding;ATP binding;binding;catalytic activity;cation binding;cytokine receptor binding;enzyme binding;growth factor receptor binding;growth hormone receptor binding;heme binding;histone binding;histone kinase activity;histone kinase activity (H3-Y41 specific);histone tyrosine kinase activity;hormone receptor binding;interleukin-12 receptor binding;…	adherens junction;anchoring junction;caveola;cell junction;cell part;cell-substrate adherens junction;cell-substrate junction;cytoplasm;cytoplasmic part;cytoskeleton;cytosol;endomembrane system;endosomal part;endosome lumen;extrinsic to internal side of plasma membrane;extrinsic to membrane;extrinsic to plasma membrane;focal adhesion;intracellular membrane-bounded organelle;intracellular non-memb…	P23458	138610000	0.00922222	3.89613	P23458;O60674	Tyrosine-protein kinase JAK1	JAK1	23.9524	24.6204	23.6953	23.416	23.4133	23.7407	21.5039	22.8729	22.9768	22.7959	22.8762	23.1111	21.977	22.1172	23.0593	16	16	16	15.9	15.9	15.9	133.28	0	123.48	40
ATP synthase subunit alpha, mitochondrial	ATP5A1	+	0.861852	1.50087	ATP biosynthetic process;ATP hydrolysis coupled proton transport;ATP metabolic process;ATP synthesis coupled proton transport;biological regulation;biosynthetic process;cation transport;cellular biosynthetic process;cellular metabolic process;cellular nitrogen compound biosynthetic process;cellular nitrogen compound metabolic process;cellular process;developmental process;electron transport chain…	active transmembrane transporter activity;adenyl nucleotide binding;adenyl ribonucleotide binding;ATP binding;ATPase activity;ATPase activity, coupled;ATPase activity, coupled to movement of substances;ATPase activity, coupled to transmembrane movement of ions;ATPase activity, coupled to transmembrane movement of substances;binding;catalytic activity;cation transmembrane transporter activity;cati…	cell part;cytoplasmic part;extracellular membrane-bounded organelle;extracellular organelle;extracellular region part;extracellular vesicular exosome;intracellular membrane-bounded organelle;intracellular organelle;intracellular organelle lumen;intracellular organelle part;intracellular part;macromolecular complex;membrane;membrane part;membrane-bounded organelle;membrane-bounded vesicle;membrane…	P25705	375910000	0.0175897	2.55278	P25705	ATP synthase subunit alpha, mitochondrial	ATP5A1	25.2144	25.4909	25.0078	24.5435	24.3318	24.4765	24.4765	24.9591	25.0975	25.1108	24.8716	24.9843	24.6256	23.7648	24.7372	18	18	18	32.7	32.7	32.7	59.75	0	318.88	125
Calnexin	CANX	+	2.21604	1.48621	aging;antigen processing and presentation;antigen processing and presentation of exogenous antigen;antigen processing and presentation of exogenous peptide antigen;antigen processing and presentation of exogenous peptide antigen via MHC class II;antigen processing and presentation of peptide antigen;antigen processing and presentation of peptide antigen via MHC class I;antigen processing and pres…	binding;calcium ion binding;carbohydrate binding;cation binding;ion binding;metal ion binding	axon;cell body;cell part;cell projection;cell projection cytoplasm;cell projection part;cytoplasmic membrane-bounded vesicle;cytoplasmic part;cytoplasmic vesicle;dendrite cytoplasm;dendritic spine;endoplasmic reticulum;endoplasmic reticulum lumen;endoplasmic reticulum membrane;endoplasmic reticulum part;ER-mitochondrion membrane contact site;extracellular membrane-bounded organelle;extracellular …	P27824	86970000	0.0180253	2.52101	P27824	Calnexin	CANX	23.6439	23.2105	23.4042	23.1157	22.7911	23.4928	19.1451	22.3583	22.8122	22.8751	22.611	22.4738	20.7377	19.9844	22.8883	5	5	5	11.1	11.1	11.1	67.567	0	68.752	20
Elongation factor 1-delta	EEF1D	+	0.722881	1.64679	biological regulation;biosynthetic process;cellular biosynthetic process;cellular macromolecule biosynthetic process;cellular macromolecule metabolic process;cellular metabolic process;cellular nitrogen compound metabolic process;cellular process;cellular protein metabolic process;cellular response to abiotic stimulus;cellular response to ionizing radiation;cellular response to radiation;cellular…	activating transcription factor binding;binding;DNA binding;heat shock protein binding;molecular transducer activity;nucleic acid binding;protein binding;RNA binding;signal transducer activity;transcription factor binding;translation elongation factor activity;translation factor activity, nucleic acid binding	cell part;cytoplasm;cytoplasmic part;cytosol;eukaryotic translation elongation factor 1 complex;intracellular membrane-bounded organelle;intracellular non-membrane-bounded organelle;intracellular organelle;intracellular organelle part;intracellular part;macromolecular complex;membrane-bounded organelle;non-membrane-bounded organelle;nuclear part;nucleolus;nucleus;organelle;organelle part;protein …	P29692	50995000	0.0163125	2.87795	P29692	Elongation factor 1-delta	EEF1D	21.8829	22.0917	22.1371	21.9184	20.9603	22.4122	22.2131	19.956	23.1378	22.7437	22.887	22.5136	21.2471	21.7573	20.9388	5	5	5	24.9	24.9	24.9	31.121	0	123.55	21
DnaJ homolog subfamily A member 1	DNAJA1	+	1.6999	1.69729	androgen receptor signaling pathway;biological regulation;cell motility;cellular component movement;cellular localization;cellular macromolecule localization;cellular macromolecule metabolic process;cellular metabolic process;cellular process;cellular protein localization;cellular protein metabolic process;cellular response to stimulus;cellular response to stress;detection of stimulus;DNA damage …	adenyl nucleotide binding;adenyl ribonucleotide binding;ATP binding;binding;C3HC4-type RING finger domain binding;cation binding;chaperone binding;enzyme binding;G-protein-coupled receptor binding;heat shock protein binding;Hsp70 protein binding;ion binding;lipoprotein particle receptor binding;low-density lipoprotein particle receptor binding;metal ion binding;nucleotide binding;protein binding;…	cell part;cytoplasmic part;cytosol;extracellular membrane-bounded organelle;extracellular organelle;extracellular region part;extracellular vesicular exosome;intracellular membrane-bounded organelle;intracellular organelle;intracellular part;membrane;membrane-bounded organelle;membrane-bounded vesicle;mitochondrion;nucleus;organelle;perinuclear region of cytoplasm;vesicle	P31689	66209000	0.0135172	2.99462	P31689	DnaJ homolog subfamily A member 1	DNAJA1	22.5098	23.1164	22.8788	21.8862	21.349	20.9495	22.0639	22.873	22.7319	23.1664	22.581	23.2312	21.3012	20.1287	21.9754	9	9	9	19.9	19.9	19.9	44.868	0	68.561	29
Cytochrome b-c1 complex subunit 1, mitochondrial	UQCRC1	+	2.06951	2.2648	aerobic respiration;cellular macromolecule metabolic process;cellular metabolic process;cellular process;cellular protein metabolic process;cellular respiration;electron transport chain;energy derivation by oxidation of organic compounds;establishment of localization;establishment of localization in cell;establishment of protein localization;establishment of protein localization in mitochondrion;…	binding;catalytic activity;cation binding;cation transmembrane transporter activity;endopeptidase activity;enzyme binding;hydrogen ion transmembrane transporter activity;hydrolase activity;inorganic cation transmembrane transporter activity;ion binding;ion transmembrane transporter activity;metal ion binding;metalloendopeptidase activity;metallopeptidase activity;monovalent inorganic cation trans…	cell part;cytoplasmic part;intracellular membrane-bounded organelle;intracellular organelle;intracellular organelle lumen;intracellular organelle part;intracellular part;macromolecular complex;membrane;membrane part;membrane-bounded organelle;membrane-enclosed lumen;mitochondrial inner membrane;mitochondrial matrix;mitochondrial membrane;mitochondrial membrane part;mitochondrial part;mitochondria…	P31930	71312000	0.00857143	4.49428	P31930;O75439	Cytochrome b-c1 complex subunit 1, mitochondrial	UQCRC1	23.0597	23.2448	22.6472	22.2096	22.3048	22.1288	20.2299	22.7804	22.9169	23.0526	22.7096	22.3019	21.7591	20.5779	20.4062	6	6	6	16.2	16.2	16.2	52.645	0	65.394	24
Heterogeneous nuclear ribonucleoprotein H;Heterogeneous nuclear ribonucleoprotein H, N-terminally processed	HNRNPH1	+	1.87041	1.36744	biological regulation;cellular macromolecule metabolic process;cellular metabolic process;cellular nitrogen compound metabolic process;cellular process;gene expression;macromolecule metabolic process;metabolic process;mRNA metabolic process;mRNA processing;nitrogen compound metabolic process;nuclear mRNA splicing, via spliceosome;nucleic acid metabolic process;nucleobase-containing compound metab…	binding;nucleic acid binding;nucleotide binding;poly(U) RNA binding;poly-pyrimidine tract binding;RNA binding;single-stranded RNA binding	catalytic step 2 spliceosome;cell part;intracellular membrane-bounded organelle;intracellular organelle;intracellular organelle part;intracellular part;macromolecular complex;membrane;membrane-bounded organelle;nuclear part;nucleoplasm;nucleus;organelle;organelle part;ribonucleoprotein complex;spliceosomal complex	P31943	222630000	0.0206364	2.26903	P31943;P55795	Heterogeneous nuclear ribonucleoprotein H;Heterogeneous nuclear ribonucleoprotein H, N-terminally processed	HNRNPH1	24.3316	24.6533	24.5921	23.688	23.7887	24.217	23.8715	24.4467	24.5466	24.572	24.4104	24.179	21.023	23.3659	23.5769	8	8	6	24.9	24.9	18.9	49.229	0	284.47	53
Prohibitin	PHB	+	1.07566	1.60917	biological regulation;biosynthetic process;cell differentiation;cellular biosynthetic process;cellular component organization;cellular component organization at cellular level;cellular component organization or biogenesis;cellular component organization or biogenesis at cellular level;cellular developmental process;cellular macromolecule biosynthetic process;cellular macromolecule metabolic proce…	binding;complement binding;complement component C3a binding;complement component C3b binding;DNA binding;enzyme binding;G-protein-coupled receptor binding;histone deacetylase binding;nucleic acid binding;nucleic acid binding transcription factor activity;opsonin binding;protein binding;proteinase activated receptor binding;receptor binding;regulatory region DNA binding;regulatory region nucleic a…	cell part;cell surface;cytoplasm;cytoplasmic part;early endosome;endosome;extracellular membrane-bounded organelle;extracellular organelle;extracellular region part;extracellular vesicular exosome;integral to membrane;integral to plasma membrane;intracellular membrane-bounded organelle;intracellular organelle;intracellular organelle part;intracellular part;intrinsic to membrane;intrinsic to plasm…	P35232	222990000	0.0170149	2.79247	P35232	Prohibitin	PHB	24.5914	24.7269	24.091	23.1309	22.8991	23.5009	24.0944	24.6796	24.2371	24.571	24.0627	24.1023	22.9474	23.1893	24.0456	12	12	12	54.8	54.8	54.8	29.804	0	294.76	53
Basigin	BSG	+	2.10186	1.37451	anatomical structure development;anatomical structure morphogenesis;biological regulation;blood coagulation;carboxylic acid metabolic process;cell migration;cell motility;cell surface receptor linked signaling pathway;cellular component disassembly;cellular component disassembly at cellular level;cellular component movement;cellular component organization;cellular component organization at cellul…	binding;carbohydrate binding;mannose binding;monosaccharide binding;sugar binding	acrosomal membrane;adherens junction;anchoring junction;cell junction;cell part;cell-substrate adherens junction;cell-substrate junction;cytoplasmic membrane-bounded vesicle;cytoplasmic part;cytoplasmic vesicle;cytoplasmic vesicle membrane;cytoplasmic vesicle part;extracellular membrane-bounded organelle;extracellular organelle;extracellular region part;extracellular vesicular exosome;focal adhes…	P35613	75828000	0.0202299	2.28377	P35613	Basigin	BSG	23.7707	23.1667	23.3188	22.7985	19.5851	22.7033	18.8444	22.2718	19.5915	22.4063	19.9314	19.2684	20.7088	20.1495	23.0923	4	4	4	14.8	14.8	14.8	42.2	0	37.057	17
ATP synthase subunit gamma, mitochondrial	ATP5C1	+	2.19008	2.2014	ATP biosynthetic process;ATP metabolic process;ATP synthesis coupled proton transport;biosynthetic process;cation transport;cellular biosynthetic process;cellular metabolic process;cellular nitrogen compound biosynthetic process;cellular nitrogen compound metabolic process;cellular process;electron transport chain;energy coupled proton transport, down electrochemical gradient;establishment of loc…	active transmembrane transporter activity;ATPase activity;ATPase activity, coupled;ATPase activity, coupled to movement of substances;ATPase activity, coupled to transmembrane movement of ions;ATPase activity, coupled to transmembrane movement of substances;catalytic activity;cation transmembrane transporter activity;cation-transporting ATPase activity;hydrogen ion transmembrane transporter activ…	cell part;cytoplasmic part;extracellular membrane-bounded organelle;extracellular organelle;extracellular region part;extracellular vesicular exosome;intracellular membrane-bounded organelle;intracellular organelle;intracellular organelle lumen;intracellular organelle part;intracellular part;macromolecular complex;membrane;membrane part;membrane-bounded organelle;membrane-bounded vesicle;membrane…	P36542	45211000	0.00835294	4.30671	P36542	ATP synthase subunit gamma, mitochondrial	ATP5C1	22.6477	22.1827	22.739	21.7493	20.3289	22.0811	21.8555	21.8407	20.651	21.9457	22.1041	21.9186	21.0536	20.5181	19.4274	5	5	5	19.1	19.1	19.1	32.996	0	36.463	9
Stress-70 protein, mitochondrial	HSPA9	+	2.51931	1.86118	biological regulation;cellular macromolecule metabolic process;cellular metabolic process;cellular process;cellular protein metabolic process;establishment of localization;establishment of localization in cell;establishment of protein localization;establishment of protein localization in mitochondrion;establishment of protein localization to organelle;intracellular protein transport;intracellular…	adenyl nucleotide binding;adenyl ribonucleotide binding;ATP binding;binding;enzyme binding;nucleotide binding;protein binding;purine nucleotide binding;purine ribonucleoside triphosphate binding;purine ribonucleotide binding;ribonucleotide binding;ubiquitin protein ligase binding;unfolded protein binding	adherens junction;anchoring junction;cell junction;cell part;cell-substrate adherens junction;cell-substrate junction;cytoplasm;cytoplasmic part;extracellular membrane-bounded organelle;extracellular organelle;extracellular region part;extracellular vesicular exosome;focal adhesion;intracellular membrane-bounded organelle;intracellular non-membrane-bounded organelle;intracellular organelle;intrac…	P38646	115660000	0.00983333	3.38988	P38646	Stress-70 protein, mitochondrial	HSPA9	23.4344	23.8574	23.2598	22.7354	20.2856	22.2272	23.4008	23.7338	23.6624	24.4255	23.6461	23.9162	19.8499	20.8143	22.3296	15	14	14	25.6	24.6	24.6	73.68	0	244.97	62
Dolichyl-diphosphooligosaccharide--protein glycosyltransferase 48 kDa subunit	DDOST	+	1.75729	2.28023	biosynthetic process;carbohydrate metabolic process;cell activation;cellular biosynthetic process;cellular carbohydrate metabolic process;cellular macromolecule biosynthetic process;cellular macromolecule metabolic process;cellular metabolic process;cellular process;cellular protein metabolic process;cotranslational protein targeting to membrane;defense response;establishment of localization;esta…	catalytic activity;dolichyl-diphosphooligosaccharide-protein glycotransferase activity;oligosaccharyl transferase activity;transferase activity;transferase activity, transferring glycosyl groups;transferase activity, transferring hexosyl groups	cell part;cytoplasmic part;endoplasmic reticulum;endoplasmic reticulum membrane;endoplasmic reticulum part;integral to membrane;intracellular membrane-bounded organelle;intracellular organelle;intracellular organelle part;intracellular part;intrinsic to membrane;macromolecular complex;membrane;membrane part;membrane-bounded organelle;oligosaccharyltransferase complex;organelle;organelle membrane;…	P39656	43430000	0.00888889	4.54081	P39656	Dolichyl-diphosphooligosaccharide--protein glycosyltransferase 48 kDa subunit	DDOST	22.6833	22.5053	22.377	22.4478	21.7782	22.0713	21.2485	21.1127	19.872	21.5469	21.6301	21.4933	21.5177	20.3729	20.4031	4	4	4	8.3	8.3	8.3	50.8	0	30.581	15
Lamina-associated polypeptide 2, isoforms beta/gamma;Thymopoietin;Thymopentin	TMPO	+	1.78126	2.88224	biological regulation;regulation of biological process;regulation of biosynthetic process;regulation of cellular biosynthetic process;regulation of cellular macromolecule biosynthetic process;regulation of cellular metabolic process;regulation of cellular process;regulation of gene expression;regulation of macromolecule biosynthetic process;regulation of macromolecule metabolic process;regulation…	binding;DNA binding;lamin binding;nucleic acid binding;protein binding	cell part;chromatin;chromosomal part;cytoplasm;envelope;integral to membrane;intracellular membrane-bounded organelle;intracellular organelle;intracellular organelle part;intracellular part;intrinsic to membrane;membrane;membrane part;membrane-bounded organelle;nuclear envelope;nuclear inner membrane;nuclear membrane;nuclear part;nucleus;organelle;organelle envelope;organelle inner membrane;organ…	P42167	47567000	0.00566667	6.67177	P42167;P42166	Lamina-associated polypeptide 2, isoforms beta/gamma;Thymopoietin;Thymopentin	TMPO	22.624	22.4701	22.4289	22.2975	22.3224	22.7704	19.4304	22.1436	19.2993	22.1755	20.5258	21.5904	20.8176	20.2369	21.1247	7	7	7	21.1	21.1	21.1	50.67	0	64.179	13
40S ribosomal protein S27;40S ribosomal protein S27-like	RPS27;RPS27L	+	3.19884	3.02393	activation of caspase activity;biological regulation;biosynthetic process;catabolic process;cell cycle;cell cycle checkpoint;cell proliferation;cellular biosynthetic process;cellular catabolic process;cellular component disassembly;cellular component disassembly at cellular level;cellular component organization;cellular component organization at cellular level;cellular component organization or b…	apoptotic protease activator activity;binding;caspase activator activity;caspase regulator activity;cation binding;DNA binding;enzyme activator activity;enzyme regulator activity;ion binding;metal ion binding;nucleic acid binding;peptidase activator activity;peptidase regulator activity;structural constituent of ribosome;structural molecule activity;transition metal ion binding;translation activa…	cell part;cytoplasmic part;cytosol;cytosolic small ribosomal subunit;intracellular membrane-bounded organelle;intracellular non-membrane-bounded organelle;intracellular organelle;intracellular organelle part;intracellular part;macromolecular complex;membrane-bounded organelle;non-membrane-bounded organelle;nucleus;organelle;organelle part;ribonucleoprotein complex;ribosome;small ribosomal subunit	P42677;Q71UM5	100240000	0.00755556	7.27903	P42677;Q71UM5	40S ribosomal protein S27;40S ribosomal protein S27-like	RPS27;RPS27L	23.7535	24.0325	23.2956	23.3009	23.3404	22.9054	20.2248	22.6914	22.7597	22.756	22.7938	22.3697	20.444	21.1831	19.8579	4	4	4	41.7	41.7	41.7	9.461	0	56.67	22
Phosphorylase b kinase regulatory subunit alpha, liver isoform	PHKA2	+	1.00881	1.14402	alcohol metabolic process;carbohydrate catabolic process;carbohydrate metabolic process;catabolic process;cellular carbohydrate catabolic process;cellular carbohydrate metabolic process;cellular glucan metabolic process;cellular macromolecule metabolic process;cellular metabolic process;cellular polysaccharide catabolic process;cellular polysaccharide metabolic process;cellular process;cellular p…	calmodulin-dependent protein kinase activity;catalytic activity;hydrolase activity;hydrolase activity, acting on glycosyl bonds;hydrolase activity, hydrolyzing O-glycosyl compounds;kinase activity;phosphorylase kinase activity;phosphotransferase activity, alcohol group as acceptor;protein kinase activity;protein serine/threonine kinase activity;transferase activity;transferase activity, transferr…	cell part;cytoplasmic part;cytosol;intracellular part;macromolecular complex;membrane;phosphorylase kinase complex;plasma membrane;protein complex	P46019	61472000	0.0445385	1.81594	P46019	Phosphorylase b kinase regulatory subunit alpha, liver isoform	PHKA2	22.4784	22.6597	22.5395	22.2757	22.2074	21.5603	20.8175	22.2911	22.5555	22.3697	22.3681	22.1757	22.2904	20.4687	21.8922	6	6	6	5.3	5.3	5.3	138.41	0	37.951	23
Phosphorylase b kinase regulatory subunit alpha, skeletal muscle isoform	PHKA1	+	0.913867	1.25527	alcohol metabolic process;carbohydrate catabolic process;carbohydrate metabolic process;catabolic process;cellular carbohydrate catabolic process;cellular carbohydrate metabolic process;cellular glucan metabolic process;cellular macromolecule metabolic process;cellular metabolic process;cellular polysaccharide catabolic process;cellular polysaccharide metabolic process;cellular process;cellular p…	calmodulin-dependent protein kinase activity;catalytic activity;hydrolase activity;hydrolase activity, acting on glycosyl bonds;hydrolase activity, hydrolyzing O-glycosyl compounds;kinase activity;phosphorylase kinase activity;phosphotransferase activity, alcohol group as acceptor;protein kinase activity;protein serine/threonine kinase activity;transferase activity;transferase activity, transferr…	cell part;cytoplasmic part;cytosol;intracellular part;macromolecular complex;membrane;phosphorylase kinase complex;plasma membrane;protein complex	P46020	177170000	0.0277959	2.03866	P46020	Phosphorylase b kinase regulatory subunit alpha, skeletal muscle isoform	PHKA1	23.7699	24.5938	24.1385	23.4831	23.5439	23.0698	23.0279	23.8398	24.3377	24.321	23.8637	23.7365	23.4282	22.5262	23.8063	23	23	23	20.4	20.4	20.4	137.31	0	212.91	68
40S ribosomal protein S5;40S ribosomal protein S5, N-terminally processed	RPS5	+	2.95047	2.45049	biological regulation;biosynthetic process;catabolic process;cellular biosynthetic process;cellular catabolic process;cellular component disassembly;cellular component disassembly at cellular level;cellular component organization;cellular component organization at cellular level;cellular component organization or biogenesis;cellular component organization or biogenesis at cellular level;cellular …	binding;mRNA binding;nucleic acid binding;RNA binding;structural constituent of ribosome;structural molecule activity	adherens junction;anchoring junction;cell junction;cell part;cell-substrate adherens junction;cell-substrate junction;cytoplasmic part;cytosol;cytosolic small ribosomal subunit;extracellular membrane-bounded organelle;extracellular organelle;extracellular region part;extracellular vesicular exosome;focal adhesion;intracellular organelle part;intracellular part;macromolecular complex;membrane;memb…	P46782	141240000	0.00552381	5.07848	P46782	40S ribosomal protein S5;40S ribosomal protein S5, N-terminally processed	RPS5	24.2164	24.7276	23.8929	23.1182	22.5512	22.4517	22.4032	23.6077	23.2881	23.3469	23.9535	23.5276	21.4012	20.3803	22.204	7	7	7	27.5	27.5	27.5	22.876	0	101.99	26
Dolichyl-diphosphooligosaccharide--protein glycosyltransferase subunit STT3A	STT3A	+	1.35778	1.46048	carbohydrate metabolic process;cellular carbohydrate metabolic process;cellular macromolecule metabolic process;cellular metabolic process;cellular process;cellular protein metabolic process;co-translational protein modification;glycosylation;macromolecule glycosylation;macromolecule metabolic process;macromolecule modification;metabolic process;peptidyl-amino acid modification;peptidyl-asparagin…	catalytic activity;dolichyl-diphosphooligosaccharide-protein glycotransferase activity;oligosaccharyl transferase activity;transferase activity;transferase activity, transferring glycosyl groups;transferase activity, transferring hexosyl groups	cell part;cytoplasmic part;endoplasmic reticulum membrane;endoplasmic reticulum part;integral to membrane;intracellular organelle part;intracellular part;intrinsic to membrane;macromolecular complex;membrane;membrane part;oligosaccharyltransferase complex;organelle membrane;organelle part;protein complex	P46977	22254000	0.01835	2.46564	P46977	Dolichyl-diphosphooligosaccharide--protein glycosyltransferase subunit STT3A	STT3A	21.8215	21.1842	21.832	21.3547	21.2282	20.249	20.2162	21.0193	19.3057	20.9529	20.885	18.7282	20.8411	20.6787	19.2445	3	3	3	4.4	4.4	4.4	80.529	0	18.261	5
ATP synthase subunit O, mitochondrial	ATP5O	+	1.09529	1.33169	ATP biosynthetic process;ATP metabolic process;ATP synthesis coupled proton transport;biosynthetic process;cation transport;cellular biosynthetic process;cellular metabolic process;cellular nitrogen compound biosynthetic process;cellular nitrogen compound metabolic process;cellular process;electron transport chain;energy coupled proton transport, down electrochemical gradient;establishment of loc…	binding;cation transmembrane transporter activity;drug binding;hydrogen ion transmembrane transporter activity;hydrogen ion transporting ATP synthase activity, rotational mechanism;inorganic cation transmembrane transporter activity;ion transmembrane transporter activity;monovalent inorganic cation transmembrane transporter activity;substrate-specific transmembrane transporter activity;substrate-…	cell part;cytoplasmic part;extracellular membrane-bounded organelle;extracellular organelle;extracellular region part;extracellular vesicular exosome;intracellular membrane-bounded organelle;intracellular organelle;intracellular organelle part;intracellular part;macromolecular complex;membrane;membrane part;membrane-bounded organelle;membrane-bounded vesicle;mitochondrial inner membrane;mitochond…	P48047	53092000	0.0228889	2.19488	P48047	ATP synthase subunit O, mitochondrial	ATP5O	22.5272	22.6158	22.4369	20.198	20.161	22.292	21.8974	22.1435	22.3576	22.2433	22.4048	22.8294	20.7815	21.1065	22.4062	5	5	5	25.8	25.8	25.8	23.277	0	52.05	18
Coatomer subunit delta	ARCN1	+	1.99342	3.01022	adult behavior;adult locomotory behavior;anatomical structure maturation;behavior;cellular component organization;cellular component organization at cellular level;cellular component organization or biogenesis;cellular component organization or biogenesis at cellular level;cellular process;cerebellar Purkinje cell layer maturation;COPI coating of Golgi vesicle;developmental maturation;development…		AP-type membrane coat adaptor complex;cell part;clathrin adaptor complex;COPI vesicle coat;cytoplasm;cytoplasmic part;cytoplasmic vesicle part;cytosol;endoplasmic reticulum;Golgi apparatus;Golgi apparatus part;intracellular membrane-bounded organelle;intracellular organelle;intracellular organelle part;intracellular part;macromolecular complex;membrane;membrane coat;membrane part;membrane-bounded…	P48444	40861000	0.0068	7.21823	P48444	Coatomer subunit delta	ARCN1	22.1274	22.8286	22.2277	22.0291	21.9941	19.9821	20.0045	21.8724	21.7999	21.5762	21.8517	19.5292	20.6332	20.4964	20.0739	6	6	6	13.3	13.3	13.3	57.21	0	71.536	10
T-complex protein 1 subunit epsilon	CCT5	+	2.55807	2.79742	binding of sperm to zona pellucida;cell recognition;cell-cell recognition;cellular macromolecule metabolic process;cellular metabolic process;cellular process;cellular process involved in reproduction;cellular protein metabolic process;'de novo' posttranslational protein folding;'de novo' protein folding;macromolecule metabolic process;metabolic process;multi-organism process;primary metabolic pr…	adenyl nucleotide binding;adenyl ribonucleotide binding;ATP binding;beta-tubulin binding;binding;cytoskeletal protein binding;G-protein beta-subunit binding;nucleotide binding;protein binding;purine nucleotide binding;purine ribonucleoside triphosphate binding;purine ribonucleotide binding;ribonucleotide binding;tubulin binding	cell body;cell part;centrosome;chaperonin-containing T-complex;cytoplasm;cytoplasmic part;cytoskeletal part;cytosol;cytosolic part;extracellular membrane-bounded organelle;extracellular organelle;extracellular region part;extracellular vesicular exosome;intracellular non-membrane-bounded organelle;intracellular organelle;intracellular organelle part;intracellular part;macromolecular complex;membr…	P48643	64415000	0.00453333	6.32965	P48643	T-complex protein 1 subunit epsilon	CCT5	22.363	23.1151	22.646	20.8644	19.7676	22.6603	22.2845	22.4826	22.5996	22.9067	22.1932	22.4203	19.608	20.775	20.0668	10	10	10	20.7	20.7	20.7	59.67	0	93.461	16
T-complex protein 1 subunit gamma	CCT3	+	1.80309	1.43663	binding of sperm to zona pellucida;cell recognition;cell-cell recognition;cellular component assembly;cellular component assembly at cellular level;cellular component organization;cellular component organization at cellular level;cellular component organization or biogenesis;cellular component organization or biogenesis at cellular level;cellular macromolecule metabolic process;cellular metabolic…	adenyl nucleotide binding;adenyl ribonucleotide binding;ATP binding;binding;nucleotide binding;protein binding;purine nucleotide binding;purine ribonucleoside triphosphate binding;purine ribonucleotide binding;ribonucleotide binding;unfolded protein binding	cell body;cell part;chaperonin-containing T-complex;cytoplasm;cytoplasmic part;cytoskeletal part;cytoskeleton;cytosol;cytosolic part;extracellular membrane-bounded organelle;extracellular organelle;extracellular region part;extracellular vesicular exosome;intracellular non-membrane-bounded organelle;intracellular organelle;intracellular organelle part;intracellular part;macromolecular complex;mem…	P49368	44602000	0.0193253	2.4147	P49368	T-complex protein 1 subunit gamma	CCT3	22.2399	22.6146	22.1234	21.9859	22.2044	21.9751	21.317	21.5967	21.6261	21.6944	21.2594	21.2431	21.8127	20.4772	19.2787	8	8	8	15.6	15.6	15.6	60.533	0	95.491	31
Elongation factor Tu, mitochondrial	TUFM	+	3.10429	2.04964	biosynthetic process;cellular biosynthetic process;cellular component organization;cellular component organization at cellular level;cellular component organization or biogenesis;cellular component organization or biogenesis at cellular level;cellular macromolecule biosynthetic process;cellular macromolecule metabolic process;cellular metabolic process;cellular process;cellular protein metabolic …	binding;catalytic activity;GTP binding;GTPase activity;guanyl nucleotide binding;guanyl ribonucleotide binding;hydrolase activity;hydrolase activity, acting on acid anhydrides;hydrolase activity, acting on acid anhydrides, in phosphorus-containing anhydrides;nucleic acid binding;nucleoside-triphosphatase activity;nucleotide binding;purine nucleotide binding;purine ribonucleoside triphosphate bind…	cell part;cytoplasmic part;extracellular membrane-bounded organelle;extracellular organelle;extracellular region part;extracellular vesicular exosome;intracellular membrane-bounded organelle;intracellular non-membrane-bounded organelle;intracellular organelle;intracellular organelle part;intracellular part;membrane;membrane-bounded organelle;membrane-bounded vesicle;mitochondrial nucleoid;mitocho…	P49411	207220000	0.00873684	3.88009	P49411	Elongation factor Tu, mitochondrial	TUFM	24.7189	24.8028	24.8269	23.1226	23.413	23.6087	23.575	24.1812	24.1412	24.5648	23.6969	23.8255	20.4977	21.3356	23.2024	12	12	12	37.8	37.8	37.8	49.541	0	216.59	43
Emerin	EMD	+	1.5041	2.8428	anatomical structure development;biological regulation;cell cycle;cell cycle process;cell differentiation;cellular component disassembly;cellular component disassembly at cellular level;cellular component organization;cellular component organization at cellular level;cellular component organization or biogenesis;cellular component organization or biogenesis at cellular level;cellular developmenta…	actin binding;beta-tubulin binding;binding;cytoskeletal protein binding;protein binding;tubulin binding	cell part;cytoplasmic part;cytoskeletal part;endoplasmic reticulum;envelope;integral to membrane;intracellular membrane-bounded organelle;intracellular organelle;intracellular organelle part;intracellular part;intrinsic to membrane;macromolecular complex;membrane;membrane part;membrane-bounded organelle;microtubule;nuclear envelope;nuclear inner membrane;nuclear membrane;nuclear outer membrane;nu…	P50402	23459000	0.00523077	6.51077	P50402	Emerin	EMD	21.6752	22.2185	21.6892	21.6185	19.6104	20.108	19.5027	19.5534	20.7468	21.1427	19.9397	19.8908	20.5767	20.0799	20.414	3	3	3	15.4	15.4	15.4	28.994	0	22.6	7
Ras-related protein Rab-7a	RAB7A	+	1.77873	1.77479	anatomical structure homeostasis;antigen processing and presentation;antigen processing and presentation of exogenous antigen;antigen processing and presentation of exogenous peptide antigen;antigen processing and presentation of exogenous peptide antigen via MHC class II;antigen processing and presentation of peptide antigen;antigen processing and presentation of peptide antigen via MHC class II…	binding;catalytic activity;GDP binding;GTP binding;GTPase activity;guanyl nucleotide binding;guanyl ribonucleotide binding;hydrolase activity;hydrolase activity, acting on acid anhydrides;hydrolase activity, acting on acid anhydrides, in phosphorus-containing anhydrides;nucleoside-triphosphatase activity;nucleotide binding;purine nucleotide binding;purine ribonucleoside triphosphate binding;purin…	cell part;cytoplasmic membrane-bounded vesicle;cytoplasmic part;cytoplasmic vesicle;cytoplasmic vesicle membrane;cytoplasmic vesicle part;endocytic vesicle;endocytic vesicle membrane;endosome;extracellular membrane-bounded organelle;extracellular organelle;extracellular region part;extracellular vesicular exosome;Golgi apparatus;intracellular membrane-bounded organelle;intracellular organelle;int…	P51149	46754000	0.01192	3.17823	P51149	Ras-related protein Rab-7a	RAB7A	22.6759	22.3211	22.5633	22.2402	21.9838	22.0651	20.0182	21.6343	21.9323	21.6097	20.5383	21.658	20.4203	19.9911	21.8126	4	4	4	22.7	22.7	22.7	23.489	0	54.727	21
Heterogeneous nuclear ribonucleoprotein M	HNRNPM	+	1.84246	1.28364	alternative nuclear mRNA splicing, via spliceosome;cellular macromolecule metabolic process;cellular metabolic process;cellular nitrogen compound metabolic process;cellular process;gene expression;macromolecule metabolic process;metabolic process;mRNA metabolic process;mRNA processing;nitrogen compound metabolic process;nuclear mRNA splicing, via spliceosome;nucleic acid metabolic process;nucleob…	binding;nucleic acid binding;nucleotide binding;protein binding;protein domain specific binding;RNA binding	catalytic step 2 spliceosome;cell part;extracellular matrix;extracellular membrane-bounded organelle;extracellular organelle;extracellular region part;extracellular vesicular exosome;integral to membrane;integral to plasma membrane;intracellular non-membrane-bounded organelle;intracellular organelle;intracellular organelle part;intracellular part;intrinsic to membrane;intrinsic to plasma membrane…	P52272	47146000	0.0257634	2.09632	P52272	Heterogeneous nuclear ribonucleoprotein M	HNRNPM	22.1463	22.8356	21.9119	20.255	19.3651	19.4264	22.132	22.7705	21.3761	23.0326	22.6994	22.5018	22.0961	19.3741	19.8962	10	10	10	15.9	15.9	15.9	77.515	0	100.72	16
Coatomer subunit beta	COPB1	+	3.04662	3.67651	cellular component organization;cellular component organization at cellular level;cellular component organization or biogenesis;cellular component organization or biogenesis at cellular level;cellular process;COPI coating of Golgi vesicle;establishment of localization;establishment of localization in cell;establishment of protein localization;Golgi transport vesicle coating;Golgi vesicle transpor…	structural molecule activity	cell part;COPI vesicle coat;cytoplasm;cytoplasmic membrane-bounded vesicle;cytoplasmic part;cytoplasmic vesicle;cytoplasmic vesicle part;cytosol;endoplasmic reticulum-Golgi intermediate compartment;Golgi apparatus;Golgi apparatus part;Golgi membrane;Golgi-associated vesicle;intracellular membrane-bounded organelle;intracellular organelle;intracellular organelle part;intracellular part;macromolecu…	P53618	68659000	0	10.7713	P53618	Coatomer subunit beta	COPB1	23.0108	23.0275	23.2296	23.3701	22.9162	22.8434	20.2361	22.4345	20.6002	22.5821	21.0099	22.1796	20.5146	20.0479	19.5656	9	9	9	11.2	11.2	11.2	107.14	0	74.012	31
Methylosome subunit pICln	CLNS1A	+	3.28342	1.57407	anion transport;biological regulation;cell volume homeostasis;cellular component assembly;cellular component assembly at cellular level;cellular component organization;cellular component organization at cellular level;cellular component organization or biogenesis;cellular component organization or biogenesis at cellular level;cellular homeostasis;cellular macromolecular complex assembly;cellular …	binding;protein binding;protein dimerization activity;protein heterodimerization activity	cell part;cytoplasm;cytoplasmic part;cytoskeleton;cytosol;intracellular membrane-bounded organelle;intracellular non-membrane-bounded organelle;intracellular organelle;intracellular organelle part;intracellular part;macromolecular complex;membrane;membrane-bounded organelle;methylosome;methyltransferase complex;non-membrane-bounded organelle;nuclear part;nucleoplasm;nucleus;organelle;organelle pa…	P54105	113990000	0.0170704	2.71377	P54105	Methylosome subunit pICln	CLNS1A	23.6505	23.8209	23.5721	23.5186	23.6073	23.2791	20.7762	23.2149	23.498	23.8437	23.3435	23.4059	22.7803	19.5498	18.8631	4	4	4	24.1	24.1	24.1	26.215	0	44.51	23
Sodium/potassium-transporting ATPase subunit beta-3	ATP1B3	+	3.36764	2.56723	biological regulation;blood coagulation;cation homeostasis;cation transport;cell migration;cell motility;cellular cation homeostasis;cellular chemical homeostasis;cellular component movement;cellular component organization;cellular component organization or biogenesis;cellular homeostasis;cellular ion homeostasis;cellular localization;cellular macromolecule localization;cellular membrane organiza…	active transmembrane transporter activity;ATPase activator activity;ATPase activity;ATPase activity, coupled;ATPase activity, coupled to movement of substances;ATPase activity, coupled to transmembrane movement of ions;ATPase activity, coupled to transmembrane movement of ions, phosphorylative mechanism;ATPase activity, coupled to transmembrane movement of substances;ATPase binding;ATPase regulat…	caveola;cell part;cytoplasmic membrane-bounded vesicle;cytoplasmic part;cytoplasmic vesicle;extracellular membrane-bounded organelle;extracellular organelle;extracellular region part;extracellular vesicular exosome;intracellular membrane-bounded organelle;intracellular organelle;intracellular part;macromolecular complex;melanosome;membrane;membrane part;membrane raft;membrane-bounded organelle;me…	P54709	58274000	0.00610526	5.47471	P54709	Sodium/potassium-transporting ATPase subunit beta-3	ATP1B3	23.1304	23.0647	22.931	22.8802	18.6067	22.4744	19.3707	22.1908	20.0772	19.7682	20.7865	19.7466	20.8572	19.3579	18.8081	5	5	5	20.8	20.8	20.8	31.512	0	40.596	12
26S proteasome non-ATPase regulatory subunit 4	PSMD4	+	1.61757	1.56272	activation of immune response;activation of innate immune response;anaphase-promoting complex-dependent proteasomal ubiquitin-dependent protein catabolic process;antigen processing and presentation;antigen processing and presentation of exogenous antigen;antigen processing and presentation of exogenous peptide antigen;antigen processing and presentation of exogenous peptide antigen via MHC class …	binding;identical protein binding;protein binding	cell part;cytoplasm;cytoplasmic part;cytosol;intracellular organelle part;intracellular part;macromolecular complex;nuclear part;nucleoplasm;organelle part;proteasome accessory complex;proteasome complex;proteasome regulatory particle, base subcomplex;protein complex	P55036	55915000	0.0177222	2.68854	P55036	26S proteasome non-ATPase regulatory subunit 4	PSMD4	22.4512	22.6459	22.5181	22.0112	21.8342	22.1745	21.7813	21.7203	22.2483	22.443	21.8524	22.0468	20.2953	20.3488	22.1183	4	4	4	14.6	14.6	14.6	40.736	0	50.373	20
Exportin-2	CSE1L	+	2.13613	1.99758	apoptosis;cell death;cell proliferation;cellular process;death;establishment of localization;establishment of localization in cell;establishment of protein localization;intracellular protein transport;intracellular transport;nuclear export;nuclear transport;nucleocytoplasmic transport;programmed cell death;protein export from nucleus;protein targeting;protein transport;transport	binding;importin-alpha export receptor activity;nuclear export signal receptor activity;protein binding;protein transporter activity;substrate-specific transporter activity;transporter activity	cell part;cytoplasm;extracellular membrane-bounded organelle;extracellular organelle;extracellular region part;extracellular vesicular exosome;intracellular membrane-bounded organelle;intracellular organelle;intracellular organelle part;intracellular part;membrane;membrane-bounded organelle;membrane-bounded vesicle;nuclear part;nucleoplasm;nucleus;organelle;organelle part;vesicle	P55060	142780000	0.00917073	3.74052	P55060	Exportin-2	CSE1L	24.3903	24.4293	24.265	24.0023	23.2291	24.0099	21.5023	22.8958	23.2396	22.9499	23.1118	22.7351	22.7893	21.0876	22.7993	12	12	12	12.6	12.6	12.6	110.42	0	104.02	40
Transmembrane protein 33	TMEM33	+	1.63317	2.20179	cellular component assembly;cellular component assembly at cellular level;cellular component organization;cellular component organization at cellular level;cellular component organization or biogenesis;cellular component organization or biogenesis at cellular level;cellular localization;cellular macromolecular complex assembly;cellular macromolecular complex subunit organization;cellular macromol…	structural constituent of nuclear pore;structural molecule activity	cell part;cytoplasmic membrane-bounded vesicle;cytoplasmic part;cytoplasmic vesicle;endoplasmic reticulum;extracellular membrane-bounded organelle;extracellular organelle;extracellular region part;extracellular vesicular exosome;intracellular membrane-bounded organelle;intracellular organelle;intracellular organelle part;intracellular part;macromolecular complex;melanosome;membrane part;membrane-…	P57088	24954000	0.00860606	4.30786	P57088	Transmembrane protein 33	TMEM33	22.163	21.5553	21.8206	21.9415	19.2002	20.3435	19.8669	21.5839	20.4323	21.5799	20.6218	20.0048	20.463	20.6281	19.5482	2	2	2	8.5	8.5	8.5	27.978	0	27.768	5
Protein transport protein Sec61 subunit beta	SEC61B	+	1.90347	2.41273	antigen processing and presentation;antigen processing and presentation of exogenous antigen;antigen processing and presentation of exogenous peptide antigen;antigen processing and presentation of exogenous peptide antigen via MHC class I;antigen processing and presentation of exogenous peptide antigen via MHC class I, TAP-dependent;antigen processing and presentation of peptide antigen;antigen p…	binding;epidermal growth factor binding;growth factor binding;hormone binding;protein binding	cell part;cytoplasmic part;cytosol;endoplasmic reticulum;endoplasmic reticulum membrane;endoplasmic reticulum part;endoplasmic reticulum Sec complex;integral to membrane;intracellular membrane-bounded organelle;intracellular organelle;intracellular organelle part;intracellular part;intrinsic to membrane;macromolecular complex;membrane;membrane part;membrane-bounded organelle;organelle;organelle m…	P60468	31367000	0.00683333	4.95527	P60468	Protein transport protein Sec61 subunit beta	SEC61B	22.0813	22.6657	21.9557	19.5408	21.7744	21.6792	20.1583	21.0104	21.4696	21.1456	20.4876	20.295	19.716	20.7633	20.513	3	3	3	37.5	37.5	37.5	9.9743	0	36.025	7
10 kDa heat shock protein, mitochondrial	HSPE1	+	1.4006	1.71539	activation of caspase activity;biological regulation;cell differentiation;cellular developmental process;cellular macromolecule metabolic process;cellular metabolic process;cellular process;cellular protein metabolic process;developmental process;macromolecule metabolic process;metabolic process;osteoblast differentiation;positive regulation of caspase activity;positive regulation of catalytic ac…	adenyl nucleotide binding;adenyl ribonucleotide binding;ATP binding;binding;chaperone binding;nucleotide binding;protein binding;purine nucleotide binding;purine ribonucleoside triphosphate binding;purine ribonucleotide binding;ribonucleotide binding;unfolded protein binding	cell part;cytoplasmic part;extracellular membrane-bounded organelle;extracellular organelle;extracellular region part;extracellular vesicular exosome;intracellular membrane-bounded organelle;intracellular organelle;intracellular organelle lumen;intracellular organelle part;intracellular part;membrane;membrane-bounded organelle;membrane-bounded vesicle;membrane-enclosed lumen;mitochondrial matrix;…	P61604	38167000	0.0137544	3.03698	P61604	10 kDa heat shock protein, mitochondrial	HSPE1	21.4861	22.764	22.0473	19.6808	19.9017	22.3804	22.8035	20.5984	20.4023	19.1655	22.1143	22.312	21.1984	20.2475	20.6497	5	5	5	41.2	41.2	41.2	10.932	0	40.402	14
Heterogeneous nuclear ribonucleoprotein K	HNRNPK	+	2.64084	1.18838	biological regulation;cellular macromolecule metabolic process;cellular metabolic process;cellular nitrogen compound metabolic process;cellular process;cellular response to stimulus;gene expression;macromolecule metabolic process;metabolic process;mRNA metabolic process;mRNA processing;nitrogen compound metabolic process;nuclear mRNA splicing, via spliceosome;nucleic acid metabolic process;nucleo…	binding;core promoter proximal region DNA binding;core promoter proximal region sequence-specific DNA binding;DNA binding;nucleic acid binding;nucleic acid binding transcription factor activity;regulatory region DNA binding;regulatory region nucleic acid binding;RNA binding;RNA polymerase II core promoter proximal region sequence-specific DNA binding;RNA polymerase II core promoter proximal regio…	adherens junction;anchoring junction;catalytic step 2 spliceosome;cell junction;cell part;cell projection;cell-substrate adherens junction;cell-substrate junction;chromatin;chromosomal part;cytoplasm;cytoskeletal part;extracellular membrane-bounded organelle;extracellular organelle;extracellular region part;extracellular vesicular exosome;focal adhesion;intracellular membrane-bounded organelle;in…	P61978	103330000	0.037165	1.90416	P61978	Heterogeneous nuclear ribonucleoprotein K	HNRNPK	23.7089	23.26	23.8044	23.0553	20.2424	22.9713	23.2049	23.54	23.6443	23.4696	23.0216	23.3498	23.5015	18.778	20.5713	10	10	10	24	24	24	50.976	0	172.86	35
26S protease regulatory subunit 8	PSMC5	+	1.62383	2.20906	activation of immune response;activation of innate immune response;anaphase-promoting complex-dependent proteasomal ubiquitin-dependent protein catabolic process;antigen processing and presentation;antigen processing and presentation of exogenous antigen;antigen processing and presentation of exogenous peptide antigen;antigen processing and presentation of exogenous peptide antigen via MHC class …	adenyl nucleotide binding;adenyl ribonucleotide binding;ATP binding;ATPase activity;binding;catalytic activity;G-protein-coupled receptor binding;hormone receptor binding;hydrolase activity;hydrolase activity, acting on acid anhydrides;hydrolase activity, acting on acid anhydrides, in phosphorus-containing anhydrides;nucleoside-triphosphatase activity;nucleotide binding;peptide hormone receptor b…	blood microparticle;cell part;cytoplasm;cytoplasmic part;cytoplasmic vesicle;cytosol;cytosolic part;cytosolic proteasome complex;extracellular membrane-bounded organelle;extracellular organelle;extracellular region part;extracellular vesicular exosome;inclusion body;intracellular membrane-bounded organelle;intracellular organelle;intracellular organelle part;intracellular part;macromolecular comp…	P62195	34403000	0.008875	4.32908	P62195;Q8NB90	26S protease regulatory subunit 8	PSMC5	21.4666	22.4263	21.6366	21.7095	20.8513	19.7423	19.7142	22.1421	21.8308	21.9806	21.498	21.4986	19.9156	20.6723	20.0701	4	4	4	11.3	11.3	11.3	45.626	0	44.564	22
40S ribosomal protein S18	RPS18	+	1.87244	1.33418	biosynthetic process;catabolic process;cellular biosynthetic process;cellular catabolic process;cellular component biogenesis;cellular component biogenesis at cellular level;cellular component disassembly;cellular component disassembly at cellular level;cellular component organization;cellular component organization at cellular level;cellular component organization or biogenesis;cellular componen…	binding;nucleic acid binding;RNA binding;rRNA binding;structural constituent of ribosome;structural molecule activity	adherens junction;anchoring junction;cell junction;cell part;cell-substrate adherens junction;cell-substrate junction;cytoplasm;cytoplasmic part;cytosol;cytosolic small ribosomal subunit;extracellular membrane-bounded organelle;extracellular organelle;extracellular region part;extracellular vesicular exosome;focal adhesion;intracellular membrane-bounded organelle;intracellular non-membrane-bounde…	P62269	132670000	0.0231461	2.20002	P62269	40S ribosomal protein S18	RPS18	23.512	24.234	23.2425	23.3181	23.0186	23.2778	23.6785	23.1719	23.2135	23.1712	24.3966	24.1832	20.364	21.8835	23.1236	11	11	11	52.6	52.6	52.6	17.718	0	99.405	21
Small nuclear ribonucleoprotein Sm D2	SNRPD2	+	1.77665	1.22085	cellular component assembly;cellular component assembly at cellular level;cellular component organization;cellular component organization at cellular level;cellular component organization or biogenesis;cellular component organization or biogenesis at cellular level;cellular macromolecular complex assembly;cellular macromolecular complex subunit organization;cellular macromolecule metabolic proces…		catalytic step 2 spliceosome;cell part;cytoplasmic part;cytosol;extracellular membrane-bounded organelle;extracellular organelle;extracellular region part;extracellular vesicular exosome;intracellular organelle part;intracellular part;macromolecular complex;membrane-bounded organelle;membrane-bounded vesicle;methylosome;methyltransferase complex;nuclear part;nucleoplasm;organelle;organelle part;p…	P62316	56871000	0.03196	1.96923	P62316	Small nuclear ribonucleoprotein Sm D2	SNRPD2	22.5677	22.626	22.7786	22.6823	22.416	19.4235	21.7809	22.3693	20.9203	22.8057	22.954	20.3188	20.3106	22.6444	19.6872	3	3	3	22	22	22	13.527	0	21.714	19
Ras-related protein Rab-11A;Ras-related protein Rab-11B	RAB11A;RAB11B	+	1.15492	1.12682	astral microtubule organization;biological regulation;cation transport;cell cycle process;cell projection organization;cellular component assembly;cellular component assembly at cellular level;cellular component organization;cellular component organization at cellular level;cellular component organization or biogenesis;cellular component organization or biogenesis at cellular level;cellular local…	binding;catalytic activity;cytoskeletal protein binding;GDP binding;GTP binding;GTPase activity;guanyl nucleotide binding;guanyl ribonucleotide binding;hydrolase activity;hydrolase activity, acting on acid anhydrides;hydrolase activity, acting on acid anhydrides, in phosphorus-containing anhydrides;microtubule binding;myosin binding;myosin V binding;nucleoside-triphosphatase activity;nucleotide b…	axon;cell division site part;cell junction;cell part;cell projection;clathrin coated vesicle membrane;clathrin-coated vesicle;cleavage furrow;coated vesicle;coated vesicle membrane;cytoplasmic membrane-bounded vesicle;cytoplasmic part;cytoplasmic vesicle;cytoplasmic vesicle membrane;cytoplasmic vesicle part;cytoskeletal part;cytosol;endocytic vesicle;endocytic vesicle membrane;endosomal part;endo…	P62491;Q15907	98361000	0.0475472	1.78192	P62491;Q15907	Ras-related protein Rab-11A;Ras-related protein Rab-11B	RAB11A;RAB11B	22.9657	23.487	23.331	22.7773	22.8321	22.6517	22.2227	22.5133	22.5326	22.9381	22.8754	22.5497	22.8469	20.8544	22.6177	8	8	8	35.6	35.6	35.6	24.393	0	55.731	27
Guanine nucleotide-binding protein G(I)/G(S)/G(T) subunit beta-1;Guanine nucleotide-binding protein subunit beta-4	GNB1;GNB4	+	0.705629	1.27646	activation of adenylate cyclase activity;activation of adenylate cyclase activity by dopamine receptor signaling pathway;activation of adenylate cyclase activity by G-protein signaling pathway;activation of phospholipase C activity;activation of phospholipase C activity by G-protein coupled receptor protein signaling pathway coupled to IP3 second messenger;anatomical structure development;apoptos…	binding;catalytic activity;enzyme binding;GTPase activity;GTPase binding;hydrolase activity;hydrolase activity, acting on acid anhydrides;hydrolase activity, acting on acid anhydrides, in phosphorus-containing anhydrides;molecular transducer activity;nucleoside-triphosphatase activity;protein binding;protein complex binding;pyrophosphatase activity;signal transducer activity	cell body;cell part;cell projection;cell projection part;cilium part;cytoplasmic part;dendrite;extracellular membrane-bounded organelle;extracellular organelle;extracellular region part;extracellular vesicular exosome;extrinsic to internal side of plasma membrane;extrinsic to membrane;extrinsic to plasma membrane;heterotrimeric G-protein complex;intracellular;intracellular organelle part;intracel…	P62873;Q9HAV0	50958000	0.0265833	2.08169	P62873;Q9HAV0;P16520	Guanine nucleotide-binding protein G(I)/G(S)/G(T) subunit beta-1;Guanine nucleotide-binding protein subunit beta-4	GNB1;GNB4	22.2215	22.573	22.0922	21.8493	20.333	19.9003	22.2324	22.5537	22.6488	22.6269	21.2861	22.5029	21.973	20.9828	21.8141	3	3	1	9.4	9.4	3.5	37.377	0	23.03	16
Peptidyl-prolyl cis-trans isomerase A;Peptidyl-prolyl cis-trans isomerase A, N-terminally processed	PPIA	+	1.69058	1.45897	biological regulation;biosynthetic process;blood coagulation;cell activation;cell migration;cell motility;cellular biosynthetic process;cellular component assembly;cellular component assembly at cellular level;cellular component movement;cellular component organization;cellular component organization at cellular level;cellular component organization or biogenesis;cellular component organization o…	binding;catalytic activity;cis-trans isomerase activity;isomerase activity;peptide binding;peptidyl-prolyl cis-trans isomerase activity;protein binding;unfolded protein binding;virion binding	adherens junction;anchoring junction;cell junction;cell part;cell-substrate adherens junction;cell-substrate junction;cytoplasm;cytoplasmic part;cytosol;extracellular membrane-bounded organelle;extracellular organelle;extracellular region;extracellular region part;extracellular space;extracellular vesicular exosome;focal adhesion;intracellular membrane-bounded organelle;intracellular organelle;in…	P62937	81504000	0.0192099	2.46239	P62937;P0DN26;A0A0B4J2A2;A0A075B759;Q9Y536;F5H284	Peptidyl-prolyl cis-trans isomerase A;Peptidyl-prolyl cis-trans isomerase A, N-terminally processed	PPIA	22.0943	23.951	22.354	21.9309	19.3579	22.4326	22.6883	21.8515	22.307	22.5269	22.4764	22.5065	20.9289	20.5838	21.8148	6	6	6	43	43	43	18.012	0	47.136	24
Elongation factor 1-alpha 1;Putative elongation factor 1-alpha-like 3;Elongation factor 1-alpha 2	EEF1A1;EEF1A1P5;EEF1A2	+	0.520192	1.68465	biological regulation;biosynthetic process;cellular biosynthetic process;cellular macromolecule biosynthetic process;cellular macromolecule metabolic process;cellular metabolic process;cellular nitrogen compound metabolic process;cellular process;cellular protein metabolic process;cellular response to chemical stimulus;cellular response to endogenous stimulus;cellular response to epidermal growth…	binding;catalytic activity;enzyme binding;GTP binding;GTPase activity;guanyl nucleotide binding;guanyl ribonucleotide binding;hydrolase activity;hydrolase activity, acting on acid anhydrides;hydrolase activity, acting on acid anhydrides, in phosphorus-containing anhydrides;kinase binding;nucleic acid binding;nucleoside-triphosphatase activity;nucleotide binding;protein binding;protein kinase bind…	cell body;cell cortex part;cell part;cell projection membrane;cell projection part;cortical actin cytoskeleton;cortical cytoskeleton;cytoplasm;cytoplasmic part;cytoskeletal part;cytoskeleton;cytosol;eukaryotic translation elongation factor 1 complex;extracellular membrane-bounded organelle;extracellular organelle;extracellular region part;extracellular space;extracellular vesicular exosome;intrac…	P68104;Q5VTE0;Q05639	419430000	0.0141017	2.96518	P68104;Q5VTE0;Q05639	Elongation factor 1-alpha 1;Putative elongation factor 1-alpha-like 3;Elongation factor 1-alpha 2	EEF1A1;EEF1A1P5;EEF1A2	25.2003	25.6677	25.1684	24.7365	25.011	25.046	24.5743	25.3535	24.7607	25.0126	25.2416	24.8441	24.6977	24.8445	24.9338	9	9	9	23.6	23.6	23.6	50.14	0	132.39	65
Tubulin alpha-1B chain;Tubulin alpha-4A chain	TUBA1B;TUBA4A	+	0.689966	2.24282	biological regulation;blood coagulation;cell activation;cell cycle;cell cycle process;cell division;cellular component assembly;cellular component assembly at cellular level;cellular component organization;cellular component organization at cellular level;cellular component organization or biogenesis;cellular component organization or biogenesis at cellular level;cellular macromolecular complex a…	binding;catalytic activity;double-stranded RNA binding;enzyme binding;GTP binding;GTPase activity;guanyl nucleotide binding;guanyl ribonucleotide binding;hydrolase activity;hydrolase activity, acting on acid anhydrides;hydrolase activity, acting on acid anhydrides, in phosphorus-containing anhydrides;nucleic acid binding;nucleoside-triphosphatase activity;nucleotide binding;protein binding;purine…	cell part;cytoplasm;cytoplasmic microtubule;cytoplasmic part;cytoskeletal part;cytosol;extracellular membrane-bounded organelle;extracellular organelle;extracellular region;extracellular region part;extracellular vesicular exosome;intracellular organelle part;intracellular part;macromolecular complex;membrane-bounded organelle;membrane-bounded vesicle;microtubule;organelle;organelle part;protein …	P68363;P68366	2056900000	0.00946667	4.42861	P68363;P68366;A6NHL2	Tubulin alpha-1B chain;Tubulin alpha-4A chain	TUBA1B;TUBA4A	27.7475	27.5694	27.5307	27.3708	27.3805	27.6827	27.1523	27.1782	27.7195	27.5772	27.3666	27.4233	27.2013	26.7375	26.8388	18	18	1	47.9	47.9	2.9	50.151	0	323.31	239
DNA-dependent protein kinase catalytic subunit	PRKDC	+	1.15134	1.28236	anatomical structure development;anatomical structure formation involved in morphogenesis;anatomical structure homeostasis;anterior/posterior pattern specification;B cell lineage commitment;biological regulation;brain development;cell activation;cell death;cell differentiation;cell fate commitment;cellular component organization;cellular component organization at cellular level;cellular component…	adenyl nucleotide binding;adenyl ribonucleotide binding;ATP binding;binding;catalytic activity;DNA binding;DNA-dependent protein kinase activity;kinase activity;nucleic acid binding;nucleotide binding;phosphotransferase activity, alcohol group as acceptor;protein binding;protein kinase activity;protein serine/threonine kinase activity;purine nucleotide binding;purine ribonucleoside triphosphate b…	cell part;cytoplasmic part;cytosol;DNA-dependent protein kinase-DNA ligase 4 complex;intracellular non-membrane-bounded organelle;intracellular organelle;intracellular organelle part;intracellular part;macromolecular complex;membrane;nonhomologous end joining complex;non-membrane-bounded organelle;nuclear part;nucleolus;nucleoplasm;nucleoplasm part;organelle;organelle part;protein complex;transcr…	P78527	56597000	0.0254894	2.09371	P78527	DNA-dependent protein kinase catalytic subunit	PRKDC	23.065	23.2789	22.651	22.6806	19.0471	22.5795	19.522	21.5791	19.2963	21.8484	20.8756	21.4108	21.9313	20.9104	22.6992	15	15	15	4.5	4.5	4.5	469.08	0	130.98	24
Enhancer of rudimentary homolog	ERH	+	1.49468	1.67437	biological regulation;biosynthetic process;cell cycle;cell differentiation;cellular biosynthetic process;cellular developmental process;cellular metabolic process;cellular nitrogen compound biosynthetic process;cellular nitrogen compound metabolic process;cellular process;developmental process;heterocycle biosynthetic process;heterocycle metabolic process;metabolic process;nitrogen compound metab…		cell part;membrane;midbody	P84090	283410000	0.0136393	2.94138	P84090	Enhancer of rudimentary homolog	ERH	24.8053	24.7586	25.0091	25.2513	24.5136	24.2049	23.7916	24.033	23.7996	24.774	23.27	22.8984	23.8653	22.3584	23.8652	8	8	8	62.5	62.5	62.5	12.259	0	293.86	43
OTU domain-containing protein 4	OTUD4	+	1.07266	1.54977	cellular macromolecule metabolic process;cellular metabolic process;cellular process;cellular protein metabolic process;macromolecule metabolic process;macromolecule modification;metabolic process;primary metabolic process;protein deubiquitination;protein K48-linked deubiquitination;protein metabolic process;protein modification by small protein conjugation or removal;protein modification by smal…	catalytic activity;cysteine-type peptidase activity;hydrolase activity;peptidase activity;peptidase activity, acting on L-amino acid peptides;small conjugating protein-specific protease activity;ubiquitin-specific protease activity		Q01804	282480000	0.0172432	2.65988	Q01804	OTU domain-containing protein 4	OTUD4	24.6617	25.3475	24.6906	23.9531	24.2301	24.971	23.6308	23.3894	24.4726	24.1373	25.0601	24.202	23.4986	23.4852	24.498	18	18	18	19.4	19.4	19.4	124.04	0	323.31	66
Peroxiredoxin-1	PRDX1	+	0.736068	1.76791	4-hydroxyproline metabolic process;amine metabolic process;anatomical structure development;anatomical structure homeostasis;biological regulation;biosynthetic process;carboxylic acid metabolic process;catabolic process;cell killing;cell proliferation;cell redox homeostasis;cellular amine metabolic process;cellular amino acid metabolic process;cellular biosynthetic process;cellular catabolic proc…	antioxidant activity;binding;catalytic activity;cation binding;heme binding;ion binding;iron ion binding;metal ion binding;oxidoreductase activity;oxidoreductase activity, acting on paired donors, with incorporation or reduction of molecular oxygen;oxidoreductase activity, acting on peroxide as acceptor;peroxidase activity;peroxiredoxin activity;tetrapyrrole binding;thioredoxin peroxidase activit…	cell part;chromatin;chromosomal part;cytoplasm;cytoplasmic membrane-bounded vesicle;cytoplasmic part;cytoplasmic vesicle;cytosol;endoplasmic reticulum;euchromatin;extracellular membrane-bounded organelle;extracellular organelle;extracellular region part;extracellular space;extracellular vesicular exosome;intracellular membrane-bounded organelle;intracellular non-membrane-bounded organelle;intrace…	Q06830	351210000	0.0122264	3.1617	Q06830;Q13162	Peroxiredoxin-1	PRDX1	25.0087	25.1729	25.3975	25.1182	24.6644	24.274	24.7475	24.8508	24.6262	25.1149	24.5155	24.6631	24.7028	24.0527	24.6154	11	11	10	47.7	47.7	42.2	22.11	0	101.5	69
Cytoskeleton-associated protein 4	CKAP4	+	0.982651	1.77292	abscission;biological regulation;cell cycle;cell division;cellular process;developmental process;negative regulation of biological process;negative regulation of cell division;negative regulation of cellular process;negative regulation of cytokinesis;regulation of biological process;regulation of cell division;regulation of cellular process;regulation of cytokinesis	binding;cation binding;ion binding;lipid binding;metal ion binding;phosphatidylinositol binding;phosphatidylinositol-3-phosphate binding;phospholipid binding;transition metal ion binding;zinc ion binding	cell division site part;cell part;centrosome;cleavage furrow;cytoplasm;cytoplasmic part;cytoskeletal part;cytoskeleton;endoplasmic reticulum;endoplasmic reticulum membrane;endoplasmic reticulum part;extracellular membrane-bounded organelle;extracellular organelle;extracellular region part;extracellular vesicular exosome;integral to membrane;intracellular membrane-bounded organelle;intracellular n…	Q07065	9561400	0.0116863	3.17373	Q07065;Q96K21	Cytoskeleton-associated protein 4	CKAP4	21.4651	20.771	21.3445	20.4683	19.9351	21.5131	20.9865	19.5846	19.5403	20.4727	21.3082	20.2592	20.6145	20.176	19.8421	4	4	4	8.5	8.5	8.5	66.022	0	30.036	7
Golgin subfamily A member 3	GOLGA3	+	1.42221	1.62244	cellular process;establishment of localization;establishment of localization in cell;Golgi vesicle transport;intracellular transport;intra-Golgi vesicle-mediated transport;transport;vesicle-mediated transport	transporter activity	cell part;cytoplasmic part;cytosol;endoplasmic reticulum-Golgi intermediate compartment;Golgi apparatus;Golgi apparatus part;Golgi cisterna membrane;Golgi membrane;Golgi transport complex;intracellular membrane-bounded organelle;intracellular non-membrane-bounded organelle;intracellular organelle;intracellular organelle part;intracellular part;macromolecular complex;membrane;membrane-bounded orga…	Q08378	342460000	0.0168	2.82247	Q08378	Golgin subfamily A member 3	GOLGA3	25.5283	26.1989	25.9315	25.425	24.548	24.0444	21.3069	22.5126	21.3988	23.1966	21.6792	21.6488	24.9245	23.5347	24.9329	40	40	40	29	29	29	167.35	0	323.31	117
Eukaryotic translation initiation factor 3 subunit I	EIF3I	+	2.06074	2.63071	biological regulation;biosynthetic process;cellular biosynthetic process;cellular component assembly;cellular component assembly at cellular level;cellular component organization;cellular component organization at cellular level;cellular component organization or biogenesis;cellular component organization or biogenesis at cellular level;cellular macromolecular complex assembly;cellular macromolec…	binding;nucleic acid binding;RNA binding;translation factor activity, nucleic acid binding;translation initiation factor activity	cell part;cytoplasmic part;cytosol;eukaryotic 43S preinitiation complex;eukaryotic 48S preinitiation complex;eukaryotic translation initiation factor 3 complex;eukaryotic translation initiation factor 3 complex, eIF3m;extracellular membrane-bounded organelle;extracellular organelle;extracellular region part;extracellular vesicular exosome;intracellular part;macromolecular complex;membrane-bounded…	Q13347	30731000	0.00425	5.7003	Q13347	Eukaryotic translation initiation factor 3 subunit I	EIF3I	21.8025	22.039	22.163	18.9245	20.2255	21.5693	20.0852	21.5243	21.9031	21.4488	21.4934	20.1686	20.3985	20.1607	19.2631	6	6	6	22.5	22.5	22.5	36.501	0	43.669	12
Importin subunit beta-1	KPNB1	+	2.79241	1.53031	apoptosis;biological regulation;catabolic process;cell death;cell surface receptor linked signaling pathway;cellular catabolic process;cellular component disassembly;cellular component disassembly at cellular level;cellular component disassembly involved in apoptosis;cellular component organization;cellular component organization at cellular level;cellular component organization or biogenesis;cel…	binding;cation binding;enzyme binding;ion binding;metal ion binding;nuclear localization sequence binding;peptide binding;protein binding;protein domain specific binding;protein transporter activity;signal sequence binding;substrate-specific transporter activity;transition metal ion binding;transporter activity;zinc ion binding	cell part;cytoplasm;cytoplasmic part;cytosol;endoplasmic reticulum part;endoplasmic reticulum tubular network;envelope;extracellular membrane-bounded organelle;extracellular organelle;extracellular region part;extracellular vesicular exosome;intracellular organelle part;intracellular part;macromolecular complex;membrane;membrane part;membrane-bounded organelle;membrane-bounded vesicle;nuclear env…	Q14974	139550000	0.0170133	2.61704	Q14974	Importin subunit beta-1	KPNB1	24.1163	24.075	23.7974	22.9439	23.5716	23.8212	22.9288	22.8198	24.1563	22.8646	23.7068	23.5155	21.0314	19.4561	23.1239	9	9	9	12.8	12.8	12.8	97.169	0	79.142	34
Serine/threonine-protein kinase 38	STK38	+	0.735258	1.88407	biological regulation;cellular macromolecule metabolic process;cellular metabolic process;cellular process;cellular protein metabolic process;cellular response to stimulus;intracellular signal transduction;macromolecule metabolic process;macromolecule modification;metabolic process;negative regulation of catalytic activity;negative regulation of kinase activity;negative regulation of MAP kinase a…	adenyl nucleotide binding;adenyl ribonucleotide binding;ATP binding;binding;catalytic activity;cation binding;enzyme binding;ion binding;kinase activity;kinase binding;magnesium ion binding;metal ion binding;mitogen-activated protein kinase kinase kinase binding;nucleotide binding;phosphotransferase activity, alcohol group as acceptor;protein binding;protein kinase activity;protein kinase binding…	cell part;cytoplasm;histone methyltransferase complex;intracellular membrane-bounded organelle;intracellular organelle;intracellular organelle part;intracellular part;macromolecular complex;membrane-bounded organelle;methyltransferase complex;MLL5-L complex;nuclear part;nucleoplasm part;nucleus;organelle;organelle part;protein complex	Q15208	2427200000	0.00942222	3.44728	Q15208	Serine/threonine-protein kinase 38	STK38	27.9705	28.1028	27.5856	27.0639	27.5078	27.5665	26.6816	27.0905	26.9653	27.8691	28.1161	27.704	27.3901	26.8852	27.1778	28	28	22	51	51	42.2	54.19	0	323.31	223
Non-POU domain-containing octamer-binding protein	NONO	+	1.56596	1.76817	biological regulation;biosynthetic process;cellular biosynthetic process;cellular macromolecule biosynthetic process;cellular macromolecule metabolic process;cellular metabolic process;cellular nitrogen compound metabolic process;cellular process;cellular response to stimulus;cellular response to stress;circadian rhythm;DNA metabolic process;DNA recombination;DNA repair;macromolecule biosynthetic…	binding;core promoter binding;DNA binding;identical protein binding;nucleic acid binding;nucleotide binding;protein binding;regulatory region DNA binding;regulatory region nucleic acid binding;transcription regulatory region DNA binding	cell part;intracellular membrane-bounded organelle;intracellular non-membrane-bounded organelle;intracellular organelle;intracellular organelle part;intracellular part;membrane;membrane-bounded organelle;non-membrane-bounded organelle;nuclear body;nuclear matrix;nuclear part;nuclear speck;nucleolus;nucleoplasm;nucleoplasm part;nucleus;organelle;organelle part;paraspeckles	Q15233	251930000	0.0124615	3.16231	Q15233	Non-POU domain-containing octamer-binding protein	NONO	24.5833	25.6454	24.1822	23.6301	23.1613	23.6672	23.1185	24.0406	24.3631	24.2544	24.4692	24.1985	23.399	22.777	23.5371	18	18	18	39.3	39.3	39.3	54.231	0	211.48	77
Survival motor neuron protein	SMN1	+	1.67926	4.51962	anatomical structure development;cellular component assembly;cellular component assembly at cellular level;cellular component organization;cellular component organization at cellular level;cellular component organization or biogenesis;cellular component organization or biogenesis at cellular level;cellular macromolecular complex assembly;cellular macromolecular complex subunit organization;cellul…	binding;identical protein binding;nucleic acid binding;protein binding;RNA binding	Cajal body;cell part;contractile fiber part;cytoplasm;cytoplasmic part;cytosol;intracellular membrane-bounded organelle;intracellular organelle;intracellular organelle part;intracellular part;macromolecular complex;membrane-bounded organelle;nuclear body;nuclear part;nucleoplasm;nucleoplasm part;nucleus;organelle;organelle part;protein complex;ribonucleoprotein complex;SMN complex;SMN-Sm protein …	Q16637	25000000	0	17.6554	Q16637	Survival motor neuron protein	SMN1	21.7212	21.7465	21.6918	19.3366	19.5844	19.5856	20.2858	20.2812	21.3038	19.5859	20.2307	19.6717	19.9106	19.9885	20.2227	2	2	2	9.5	9.5	9.5	31.848	0	14.337	4
Keratinocyte proline-rich protein	KPRP	+	0.863709	1.55259			cell part;cytoplasm;extracellular membrane-bounded organelle;extracellular organelle;extracellular region part;extracellular vesicular exosome;intracellular part;membrane-bounded organelle;membrane-bounded vesicle;organelle;vesicle	Q5T749	29037000	0.0174795	2.66611	Q5T749	Keratinocyte proline-rich protein	KPRP	20.6315	21.0276	20.8672	21.7238	22.0802	22.3633	23.0174	22.3007	21.2478	18.9026	19.9759	20.6962	20.2341	20.326	19.375	3	3	3	5.5	5.5	5.5	64.135	0	20.322	10
RING finger protein 219	RNF219	+	0.760031	1.52749	biological regulation;positive regulation of biological process;positive regulation of cellular metabolic process;positive regulation of cellular process;positive regulation of macromolecule metabolic process;positive regulation of metabolic process;positive regulation of mRNA processing;positive regulation of nitrogen compound metabolic process;positive regulation of nuclear mRNA splicing, via s…	binding;cation binding;ion binding;metal ion binding;transition metal ion binding;zinc ion binding		Q5W0B1	4619600000	0.0167895	2.61086	Q5W0B1	RING finger protein 219	RNF219	29.132	28.638	29.0687	28.709	28.6442	28.328	27.6772	28.3405	28.4561	28.648	28.3401	28.2878	28.6129	27.7598	28.1859	54	54	54	51.5	51.5	51.5	81.116	0	323.31	434
Highly divergent homeobox	HDX	+	2.80239	1.67619		binding;DNA binding;nucleic acid binding	cell part;intracellular membrane-bounded organelle;intracellular organelle;intracellular part;membrane-bounded organelle;nucleus;organelle	Q7Z353	135790000	0.0138667	2.94558	Q7Z353	Highly divergent homeobox	HDX	23.693	24.0579	23.7889	23.1543	23.5024	23.2254	22.7566	23.2726	23.7189	23.6247	23.9495	23.266	20.1942	20.007	22.9313	12	12	12	22.9	22.9	22.9	77.205	0	192.22	32
Dedicator of cytokinesis protein 4	DOCK4	+	1.72211	1.76077	biological regulation;cell chemotaxis;cell migration;cell motility;cellular component movement;cellular process;cellular response to chemical stimulus;cellular response to stimulus;chemotaxis;intracellular signal transduction;locomotion;positive regulation of catalytic activity;positive regulation of GTPase activity;positive regulation of hydrolase activity;positive regulation of molecular functi…	binding;enzyme activator activity;enzyme binding;enzyme regulator activity;GTPase activator activity;GTPase binding;GTPase regulator activity;guanyl-nucleotide exchange factor activity;nucleoside-triphosphatase regulator activity;PDZ domain binding;protein binding;protein domain specific binding;Rac GTPase binding;Ras GTPase binding;receptor binding;receptor tyrosine kinase binding;Rho GTPase bin…	cell part;cell projection;cytoplasmic part;cytosol;endomembrane system;intracellular non-membrane-bounded organelle;intracellular organelle;intracellular part;membrane;microvillus;non-membrane-bounded organelle;organelle;organelle part;stereocilium;stereocilium bundle	Q8N1I0	24464000	0.0128889	3.14458	Q8N1I0	Dedicator of cytokinesis protein 4	DOCK4	21.2338	22.702	21.2567	20.8709	21.6735	21.2242	20.8359	20.6801	20.4659	20.8775	20.6843	20.1846	20.5113	19.7052	19.8096	7	7	7	4.6	4.6	4.6	225.2	0	51.048	10
Paraspeckle component 1	PSPC1	+	2.1816	1.27382	biological regulation;biosynthetic process;cellular biosynthetic process;cellular macromolecule biosynthetic process;cellular macromolecule metabolic process;cellular metabolic process;cellular nitrogen compound metabolic process;cellular process;macromolecule biosynthetic process;macromolecule metabolic process;metabolic process;negative regulation of biological process;negative regulation of bi…	binding;core promoter binding;DNA binding;nucleic acid binding;nucleotide binding;regulatory region DNA binding;regulatory region nucleic acid binding;transcription regulatory region DNA binding	cell part;cytoplasm;intracellular non-membrane-bounded organelle;intracellular organelle;intracellular organelle part;intracellular part;non-membrane-bounded organelle;nuclear body;nuclear matrix;nuclear part;nuclear speck;nucleolus;nucleoplasm;nucleoplasm part;organelle;organelle part;paraspeckles	Q8WXF1	302110000	0.0265979	2.07633	Q8WXF1	Paraspeckle component 1	PSPC1	24.872	24.9487	25.3794	24.4146	24.2072	24.2361	23.7444	24.5798	24.5714	25.0216	24.6758	24.2935	23.8035	20.8121	24.0398	15	15	15	31	31	31	58.743	0	254.86	75
Phosphorylase b kinase regulatory subunit beta	PHKB	+	0.71095	1.73212	alcohol metabolic process;carbohydrate catabolic process;carbohydrate metabolic process;catabolic process;cellular carbohydrate catabolic process;cellular carbohydrate metabolic process;cellular glucan metabolic process;cellular macromolecule metabolic process;cellular metabolic process;cellular polysaccharide catabolic process;cellular polysaccharide metabolic process;cellular process;cellular p…	calmodulin-dependent protein kinase activity;catalytic activity;hydrolase activity;hydrolase activity, acting on glycosyl bonds;hydrolase activity, hydrolyzing O-glycosyl compounds;kinase activity;phosphorylase kinase activity;phosphotransferase activity, alcohol group as acceptor;protein kinase activity;protein serine/threonine kinase activity;transferase activity;transferase activity, transferr…	cell part;cytoplasmic part;cytosol;intracellular part;macromolecular complex;membrane;phosphorylase kinase complex;plasma membrane;protein complex	Q93100	594620000	0.0124286	3.07643	Q93100	Phosphorylase b kinase regulatory subunit beta	PHKB	25.8468	26.0782	25.8391	25.3591	25.1488	25.0561	25.1697	25.5726	25.6144	25.7021	25.5726	25.6349	25.4685	24.7784	25.3843	24	24	24	23	23	23	124.88	0	323.31	119
Leucine-rich repeat-containing protein 59	LRRC59	+	1.23522	1.42966			cell part;cytoplasmic part;endoplasmic reticulum;endoplasmic reticulum membrane;endoplasmic reticulum part;envelope;integral to membrane;intracellular membrane-bounded organelle;intracellular non-membrane-bounded organelle;intracellular organelle;intracellular organelle part;intracellular part;intrinsic to membrane;membrane;membrane part;membrane-bounded organelle;mitochondrial nucleoid;mitochond…	Q96AG4	44657000	0.0190952	2.39989	Q96AG4	Leucine-rich repeat-containing protein 59	LRRC59	22.9297	21.7694	22.5958	22.6127	21.7179	22.1074	20.3948	21.0954	21.8319	21.4574	21.0282	19.0884	21.0861	20.5968	21.9064	4	4	4	10.4	10.4	10.4	34.93	0	41.215	17
Engulfment and cell motility protein 2	ELMO2	+	1.86561	1.85481	actin cytoskeleton organization;actin filament-based process;apoptosis;biological regulation;cell chemotaxis;cell death;cell migration;cell motility;cell surface receptor linked signaling pathway;cellular component movement;cellular component organization;cellular component organization at cellular level;cellular component organization or biogenesis;cellular component organization or biogenesis a…	binding;protein binding;protein domain specific binding;receptor binding;receptor tyrosine kinase binding;SH3 domain binding	cell part;cytoplasm;cytoplasmic part;cytoskeleton;cytosol;intracellular non-membrane-bounded organelle;intracellular organelle;intracellular part;membrane;non-membrane-bounded organelle;organelle;plasma membrane	Q96JJ3	47029000	0.0106122	3.37403	Q96JJ3;Q92556	Engulfment and cell motility protein 2	ELMO2	22.5367	22.786	22.2571	22.1283	22.0995	20.3093	20.2223	21.7833	21.983	22.5254	21.7684	20.3537	21.7235	20.1502	20.1092	8	8	8	13.6	13.6	13.6	82.614	0	97.61	17
C-Myc-binding protein	MYCBP	+	1.06606	1.30888	biological regulation;biosynthetic process;cellular biosynthetic process;cellular macromolecule biosynthetic process;cellular macromolecule metabolic process;cellular metabolic process;cellular nitrogen compound metabolic process;cellular process;gamete generation;macromolecule biosynthetic process;macromolecule metabolic process;male gamete generation;metabolic process;multicellular organismal p…	protein binding transcription factor activity;transcription coactivator activity;transcription cofactor activity;transcription factor binding transcription factor activity	cell part;centrosome;cytoplasm;cytoplasmic part;cytoskeletal part;intracellular membrane-bounded organelle;intracellular non-membrane-bounded organelle;intracellular organelle;intracellular organelle part;intracellular part;membrane-bounded organelle;microtubule organizing center;mitochondrion;non-membrane-bounded organelle;nucleus;organelle;organelle part	Q99417	3326200000	0.0236087	2.14794	Q99417	C-Myc-binding protein	MYCBP	28.193	27.9273	28.9761	28.265	28.7188	28.603	27.2413	28.0544	28.4253	28.3893	27.5606	27.297	27.8518	26.5618	27.4845	12	12	12	78.6	78.6	78.6	11.967	0	323.31	154
Prohibitin-2	PHB2	+	1.33542	1.658	anatomical structure development;anatomical structure morphogenesis;biological regulation;biosynthetic process;branching involved in mammary gland duct morphogenesis;branching morphogenesis of a tube;cellular biosynthetic process;cellular component organization;cellular component organization at cellular level;cellular component organization or biogenesis;cellular component organization or biogen…	binding;estrogen receptor binding;hormone receptor binding;nuclear hormone receptor binding;protein binding;protein N-terminus binding;receptor binding;steroid hormone receptor binding	cell part;cell surface;cytoplasmic part;extracellular membrane-bounded organelle;extracellular organelle;extracellular region part;extracellular vesicular exosome;intracellular membrane-bounded organelle;intracellular organelle;intracellular organelle part;intracellular part;macromolecular complex;membrane;membrane-bounded organelle;membrane-bounded vesicle;mitochondrial inner membrane;mitochondr…	Q99623	418970000	0.0156825	2.90363	Q99623	Prohibitin-2	PHB2	25.819	25.7007	25.5128	25.1645	24.862	25.2691	23.9742	25.0245	24.1184	25.2438	24.3309	24.8588	24.9091	23.4506	24.6665	14	14	14	42.5	42.5	42.5	33.296	0	271.77	95
Methylosome protein 50	WDR77	+	1.50952	2.33353	biological regulation;cell differentiation;cellular component assembly;cellular component assembly at cellular level;cellular component organization;cellular component organization at cellular level;cellular component organization or biogenesis;cellular component organization or biogenesis at cellular level;cellular developmental process;cellular macromolecular complex assembly;cellular macromole…	ligand-dependent nuclear receptor transcription coactivator activity;protein binding transcription factor activity;transcription coactivator activity;transcription cofactor activity;transcription factor binding transcription factor activity	cell part;cytoplasm;cytoplasmic part;cytosol;Golgi apparatus;intracellular membrane-bounded organelle;intracellular organelle;intracellular organelle part;intracellular part;macromolecular complex;membrane-bounded organelle;methylosome;methyltransferase complex;nuclear part;nucleoplasm;nucleus;organelle;organelle part;protein complex	Q9BQA1	17025000000	0.00630769	4.70428	Q9BQA1	Methylosome protein 50	WDR77	31.0121	30.8019	30.9067	30.6824	30.0761	30.179	29.9921	30.3055	30.815	30.9053	30.4193	30.1385	29.8477	28.7904	29.554	17	17	17	61.7	61.7	61.7	36.724	0	323.31	604
Serine/threonine-protein kinase RIO1	RIOK1	+	0.850203	1.60361		adenyl nucleotide binding;adenyl ribonucleotide binding;ATP binding;binding;catalytic activity;kinase activity;nucleotide binding;phosphotransferase activity, alcohol group as acceptor;protein kinase activity;protein serine/threonine kinase activity;purine nucleotide binding;purine ribonucleoside triphosphate binding;purine ribonucleotide binding;ribonucleotide binding;transferase activity;transf…		Q9BRS2	182610000	0.0162857	2.77993	Q9BRS2	Serine/threonine-protein kinase RIO1	RIOK1	23.7255	24.1847	23.9613	23.7858	23.0385	23.2311	23.8138	23.8411	24.2633	24.4104	24.0812	23.3879	23.4425	22.5604	23.3178	13	13	13	24.1	24.1	24.1	65.582	0	167.99	58
Uncharacterized protein C11orf84	C11orf84	+	1.14125	1.98283				Q9BUA3	379500000	0.00874419	3.70158	Q9BUA3	Uncharacterized protein C11orf84	C11orf84	25.2216	25.2352	25.7615	24.9321	25.0234	24.7844	24.1781	25.0319	24.7798	25.0081	24.172	24.8416	24.5928	23.7696	24.4321	19	19	19	58.5	58.5	58.5	41.036	0	323.31	95
Tubulin beta-2B chain	TUBB2B	+	1.17464	1.67158	cell migration;cell motility;cellular component assembly;cellular component assembly at cellular level;cellular component movement;cellular component organization;cellular component organization at cellular level;cellular component organization or biogenesis;cellular component organization or biogenesis at cellular level;cellular macromolecular complex assembly;cellular macromolecular complex sub…	binding;catalytic activity;GTP binding;GTPase activity;guanyl nucleotide binding;guanyl ribonucleotide binding;hydrolase activity;hydrolase activity, acting on acid anhydrides;hydrolase activity, acting on acid anhydrides, in phosphorus-containing anhydrides;nucleoside-triphosphatase activity;nucleotide binding;purine nucleotide binding;purine ribonucleoside triphosphate binding;purine ribonucleo…	cell part;cytoplasm;cytoskeletal part;intracellular membrane-bounded organelle;intracellular organelle;intracellular organelle part;intracellular part;macromolecular complex;membrane-bounded organelle;microtubule;nucleus;organelle;organelle part;protein complex	Q9BVA1	32299000	0.0148387	2.93493	Q9BVA1	Tubulin beta-2B chain	TUBB2B	21.7055	21.5518	21.8806	20.3299	20.3372	19.8339	22.2915	21.8812	22.2358	20.6137	22.0148	19.2512	21.0237	19.7693	20.8211	20	5	2	47.9	11.7	3.6	49.953	0	48.528	17
BolA-like protein 2	BOLA2	+	1.18738	2.60985			extracellular membrane-bounded organelle;extracellular organelle;extracellular region part;extracellular vesicular exosome;membrane-bounded organelle;membrane-bounded vesicle;organelle;vesicle	Q9H3K6	189980000	0.00377778	5.62536	Q9H3K6	BolA-like protein 2	BOLA2	24.5147	24.4304	24.5944	24.063	23.8866	23.3512	23.3019	23.6726	23.4296	24.0139	23.5723	23.9775	23.5028	22.9157	23.5589	5	5	5	72.1	72.1	72.1	10.116	0	92.14	34
Sideroflexin-1	SFXN1	+	2.95449	3.23955	biological regulation;cation homeostasis;cation transport;cell differentiation;cellular developmental process;cellular process;chemical homeostasis;developmental process;erythrocyte differentiation;establishment of localization;homeostatic process;ion homeostasis;ion transport;iron ion homeostasis;iron ion transport;metal ion transport;myeloid cell differentiation;regulation of biological quality…	ion transmembrane transporter activity;substrate-specific transmembrane transporter activity;substrate-specific transporter activity;transmembrane transporter activity;transporter activity	cell part;cytoplasmic part;integral to membrane;intracellular membrane-bounded organelle;intracellular organelle;intracellular organelle part;intracellular part;intrinsic to membrane;membrane;membrane part;membrane-bounded organelle;mitochondrial inner membrane;mitochondrial membrane;mitochondrial part;mitochondrion;organelle;organelle inner membrane;organelle membrane;organelle part	Q9H9B4	73871000	0.00971429	8.2973	Q9H9B4	Sideroflexin-1	SFXN1	23.2073	23.0929	23.3964	19.7172	20.3544	23.0734	18.7619	22.891	21.1234	22.7948	19.8007	22.8403	20.2903	19.6741	20.8687	9	9	9	39.4	39.4	39.4	35.619	0	152.78	18
MICOS complex subunit MIC19	CHCHD3	+	1.41364	2.52521	biological regulation;cellular component organization;cellular component organization at cellular level;cellular component organization or biogenesis;cellular component organization or biogenesis at cellular level;cellular membrane fusion;cellular membrane organization;cellular process;inner mitochondrial membrane organization;membrane fusion;membrane organization;mitochondrial fusion;mitochondri…	binding;enzyme binding;phosphatase binding;protein binding;protein complex scaffold;structural molecule activity	cell part;cytoplasm;cytoplasmic part;extracellular membrane-bounded organelle;extracellular organelle;extracellular region part;extracellular vesicular exosome;intracellular membrane-bounded organelle;intracellular organelle;intracellular organelle part;intracellular part;membrane;membrane-bounded organelle;membrane-bounded vesicle;mitochondrial inner membrane;mitochondrial membrane;mitochondrial…	Q9NX63	43188000	0.0058	5.32934	Q9NX63	MICOS complex subunit MIC19	CHCHD3	21.7931	22.508	22.3092	22.2323	22.1106	20.1859	19.5923	21.7162	21.7641	22.6442	20.272	21.4798	21.1009	20.5856	20.6829	4	4	4	19.4	19.4	19.4	26.152	0	33.14	25
SUN domain-containing protein 2	SUN2	+	2.35003	2.20927	actin filament-based movement;actin filament-based process;biological regulation;cell cycle process;cellular component movement;cellular component organization;cellular component organization at cellular level;cellular component organization or biogenesis;cellular component organization or biogenesis at cellular level;cellular localization;cellular membrane organization;cellular process;centrosom…	binding;cytoskeletal protein binding;identical protein binding;lamin binding;microtubule binding;protein binding;tubulin binding	cell part;chromosomal part;chromosome;chromosome, telomeric region;condensed chromosome;condensed nuclear chromosome;cytoplasmic part;endosomal part;endosome membrane;envelope;integral to membrane;integral to nuclear inner membrane;integral to organelle membrane;intracellular non-membrane-bounded organelle;intracellular organelle;intracellular organelle part;intracellular part;intrinsic to membra…	Q9UH99	542240000	0.00916129	4.3297	Q9UH99	SUN domain-containing protein 2	SUN2	26.393	26.2013	25.9601	25.7018	25.5991	25.5875	23.8665	24.6018	24.5977	24.7419	24.733	24.2131	24.0164	22.8429	24.6451	18	18	18	31.7	31.7	31.7	80.31	0	323.31	96
Stomatin-like protein 2, mitochondrial	STOML2	+	0.781805	1.21913	activation of immune response;alpha-beta T cell activation;antigen receptor-mediated signaling pathway;ATP biosynthetic process;ATP metabolic process;ATP synthesis coupled proton transport;biological regulation;biosynthetic process;calcium ion homeostasis;calcium ion transport;cation homeostasis;cation transport;CD4-positive, alpha-beta T cell activation;cell activation;cell surface receptor link…	binding;enzyme binding;GTPase binding;protein binding;receptor binding	cell part;cytoplasmic part;cytoskeleton;extrinsic to membrane;extrinsic to plasma membrane;intracellular non-membrane-bounded organelle;intracellular organelle;intracellular organelle part;intracellular part;membrane;membrane part;membrane raft;membrane-enclosed lumen;mitochondrial inner membrane;mitochondrial intermembrane space;mitochondrial membrane;mitochondrial part;non-membrane-bounded orga…	Q9UJZ1	21842000	0.0316436	1.96576	Q9UJZ1	Stomatin-like protein 2, mitochondrial	STOML2	21.3879	21.633	21.3588	20.0533	19.9903	21.0461	21.2879	21.5588	19.3267	21.94	21.0807	20.1957	20.8748	21.2299	19.9295	4	4	4	14.6	14.6	14.6	38.534	0	32.946	11
Trinucleotide repeat-containing gene 6B protein	TNRC6B	+	1.33403	1.25272	biological regulation;cell surface receptor linked signaling pathway;cellular process;cellular response to chemical stimulus;cellular response to fibroblast growth factor stimulus;cellular response to growth factor stimulus;cellular response to organic substance;cellular response to stimulus;defense response;enzyme linked receptor protein signaling pathway;epidermal growth factor receptor signali…	binding;nucleotide binding	cell part;cytoplasmic mRNA processing body;cytoplasmic part;cytosol;intracellular non-membrane-bounded organelle;intracellular organelle;intracellular part;macromolecular complex;non-membrane-bounded organelle;organelle;ribonucleoprotein complex;RNA granule	Q9UPQ9	22560000	0.027798	2.0335	Q9UPQ9	Trinucleotide repeat-containing gene 6B protein	TNRC6B	21.4296	21.4161	21.3395	20.0904	20.7362	21.0093	20.134	20.9102	21.0112	21.6712	21.8766	21.8807	21.2577	18.9993	19.9262	5	5	5	4.2	4.2	4.2	194	0	69.115	17
Serine/arginine repetitive matrix protein 2	SRRM2	+	0.976524	1.31406	cellular macromolecule metabolic process;cellular metabolic process;cellular nitrogen compound metabolic process;cellular process;macromolecule metabolic process;metabolic process;mRNA metabolic process;mRNA processing;nitrogen compound metabolic process;nuclear mRNA splicing, via spliceosome;nucleic acid metabolic process;nucleobase-containing compound metabolic process;primary metabolic process…	binding;C2H2 zinc finger domain binding;protein binding;protein domain specific binding;protein N-terminus binding	Cajal body;catalytic step 2 spliceosome;cell part;intracellular organelle part;intracellular part;macromolecular complex;nuclear body;nuclear part;nuclear speck;nucleoplasm;nucleoplasm part;organelle part;ribonucleoprotein complex;spliceosomal complex	Q9UQ35	26543000	0.0233846	2.15857	Q9UQ35	Serine/arginine repetitive matrix protein 2	SRRM2	21.0513	22.1497	20.9554	21.4623	20.6956	20.9363	19.647	21.084	21.1282	20.7837	21.5551	20.7342	20.8798	20.0877	20.2594	6	6	6	2.8	2.8	2.8	299.61	0	68.609	22
RuvB-like 2	RUVBL2	+	1.85227	1.38484	biological regulation;biosynthetic process;cellular biosynthetic process;cellular component organization;cellular component organization at cellular level;cellular component organization or biogenesis;cellular component organization or biogenesis at cellular level;cellular macromolecule biosynthetic process;cellular macromolecule metabolic process;cellular metabolic process;cellular nitrogen comp…	5'-3' DNA helicase activity;adenyl nucleotide binding;adenyl ribonucleotide binding;ATP binding;ATPase activity;ATPase activity, coupled;ATP-dependent 5'-3' DNA helicase activity;ATP-dependent DNA helicase activity;ATP-dependent helicase activity;binding;catalytic activity;chromatin binding;chromatin DNA binding;core promoter binding;core promoter sequence-specific DNA binding;damaged DNA binding…	cell part;chromatin;chromatin remodeling complex;chromosomal part;cytoplasm;DNA helicase complex;euchromatin;extracellular membrane-bounded organelle;extracellular organelle;extracellular region part;extracellular vesicular exosome;H4/H2A histone acetyltransferase complex;histone acetyltransferase complex;histone methyltransferase complex;Ino80 complex;intracellular;intracellular membrane-bounded…	Q9Y230	85693000	0.0204651	2.30538	Q9Y230	RuvB-like 2	RUVBL2	23.0175	23.2233	22.9128	22.6418	20.2184	22.467	19.3336	22.6407	23.1006	23.2647	20.1143	22.8291	20.6205	20.1995	22.7769	7	7	7	18.6	18.6	18.6	51.156	0	58.449	19
Ig kappa chain V-II region RPMI 6410;Ig kappa chain V-II region FR;Ig kappa chain V-II region Cum	IGKV A18;IGKV2D-26;IGKV2D-29;IGKV2D-30;IGKV2D-28;IGKV2-40		-0.636347	0.175437	activation of immune response;biological regulation;cellular component organization;cellular component organization or biogenesis;cellular membrane organization;cellular process;complement activation;complement activation, classical pathway;defense response;endocytosis;establishment of localization;humoral immune response;immune effector process;immune response;immune system process;innate immune…	antigen binding;binding	blood microparticle;cell part;extracellular membrane-bounded organelle;extracellular organelle;extracellular region;extracellular region part;extracellular vesicular exosome;membrane;membrane-bounded organelle;membrane-bounded vesicle;organelle;plasma membrane;vesicle	A2NJV5;A0A0A0MRZ7;A0A075B6S2;A0A075B6S6;A0A075B6P5;A0A087WW87;P06310;P01615;P01614	48432000000	0.740139	-0.467224	A2NJV5;A0A0A0MRZ7;A0A075B6S2;A0A075B6S6;A0A075B6P5;A0A087WW87;P06310;P01615;P01614;A0A0C4DH68	Ig kappa chain V-II region RPMI 6410;Ig kappa chain V-II region FR;Ig kappa chain V-II region Cum	IGKV A18;IGKV2D-26;IGKV2D-29;IGKV2D-30;IGKV2D-28;IGKV2-40	32.4669	30.4609	31.7457	31.7495	32.6013	31.2442	31.2841	30.4996	30.779	32.0962	29.889	31.6566	29.7709	33.0479	33.7638	4	4	4	19.2	19.2	19.2	13.085	0	323.31	333
Myosin regulatory light chain 12A;Myosin regulatory light chain 12B;Myosin regulatory light polypeptide 9	MYL12A;MYL12B;MYL9		0.884482	1.07696	axon guidance;biological adhesion;biological regulation;cell adhesion;cell surface receptor linked signaling pathway;cell-cell adhesion;cellular process;cellular response to stimulus;chemotaxis;enzyme linked receptor protein signaling pathway;ephrin receptor signaling pathway;establishment of localization;establishment of localization in cell;establishment of protein localization;establishment of…	binding;calcium ion binding;cation binding;ion binding;metal ion binding;structural constituent of muscle;structural molecule activity	actin filament bundle;actomyosin;apical part of cell;cell part;contractile fiber part;cytoplasmic part;cytoskeletal part;cytosol;extracellular membrane-bounded organelle;extracellular organelle;extracellular region part;extracellular vesicular exosome;intracellular organelle part;intracellular part;macromolecular complex;membrane-bounded organelle;membrane-bounded vesicle;muscle myosin complex;my…	P19105;O14950;P24844	32512000	0.059156	1.68372	P19105;O14950;P24844	Myosin regulatory light chain 12A;Myosin regulatory light chain 12B;Myosin regulatory light polypeptide 9	MYL12A;MYL12B;MYL9	21.506	21.8428	22.9053	21.2971	19.841	21.106	20.6739	19.5512	21.6526	21.3871	19.5302	21.7376	21.6796	20.6111	21.31	2	2	2	12.3	12.3	12.3	19.794	0	41.994	15
Histone H2B type 1-L;Histone H2B type 1-M;Histone H2B type 1-N;Histone H2B type 1-H;Histone H2B type 2-F;Histone H2B type 1-C/E/F/G/I;Histone H2B type 1-D;Histone H2B type F-S;Histone H2B type 1-K;Histone H2B type 1-A	HIST1H2BL;HIST1H2BM;HIST1H2BN;HIST1H2BH;HIST2H2BF;HIST1H2BC;HIST1H2BD;H2BFS;HIST1H2BK;HIST1H2BA		-1.80293	0.0019812	anatomical structure development;antibacterial humoral response;antimicrobial humoral response;ATP-dependent chromatin remodeling;biological regulation;cell migration;cell motility;cellular component assembly;cellular component assembly at cellular level;cellular component disassembly;cellular component disassembly at cellular level;cellular component movement;cellular component organization;cell…	binding;DNA binding;nucleic acid binding	cell part;chromosomal part;extracellular membrane-bounded organelle;extracellular organelle;extracellular region part;extracellular space;extracellular vesicular exosome;extrinsic to membrane;extrinsic to plasma membrane;intracellular membrane-bounded organelle;intracellular organelle;intracellular organelle part;intracellular part;macromolecular complex;membrane part;membrane-bounded organelle;m…	Q99880;Q99879;Q99877;Q93079;Q5QNW6;P62807;P58876;P57053;O60814;Q96A08	115660000	1	-4.73016	Q99880;Q99879;Q99877;Q93079;Q5QNW6;P62807;P58876;P57053;O60814;Q96A08	Histone H2B type 1-L;Histone H2B type 1-M;Histone H2B type 1-N;Histone H2B type 1-H;Histone H2B type 2-F;Histone H2B type 1-C/E/F/G/I;Histone H2B type 1-D;Histone H2B type F-S;Histone H2B type 1-K;Histone H2B type 1-A	HIST1H2BL;HIST1H2BM;HIST1H2BN;HIST1H2BH;HIST2H2BF;HIST1H2BC;HIST1H2BD;H2BFS;HIST1H2BK;HIST1H2BA	21.4229	20.906	20.3836	19.7595	22.213	19.1872	22.0497	22.4515	24.2542	26.4683	23.2208	22.6486	23.1048	22.7255	22.291	5	5	1	41.3	41.3	7.9	13.952	0	67.457	17
Importin-7	IPO7		0.934793	0.917227	biological regulation;cellular process;cellular response to stimulus;defense response;establishment of localization;establishment of localization in cell;establishment of protein localization;immune response;immune system process;innate immune response;intracellular protein transport;intracellular transport;nuclear import;nuclear transport;nucleocytoplasmic transport;protein import;protein import…	binding;enzyme binding;enzyme regulator activity;GTPase binding;GTPase regulator activity;nucleoside-triphosphatase regulator activity;protein binding;Ran GTPase binding;Ras GTPase binding;small GTPase binding;transporter activity	cell part;cytoplasm;intracellular organelle part;intracellular part;macromolecular complex;membrane;membrane part;nuclear part;nuclear pore;nucleoplasm;organelle part;pore complex;protein complex	O95373	20844000	0.0989916	1.37195	O95373	Importin-7	IPO7	21.4724	22.0026	21.8249	20.4292	20.6017	21.5203	19.5842	19.4262	19.8252	21.29	19.9937	20.7748	21.8385	19.5802	21.0767	6	5	5	6.2	5.2	5.2	119.52	0	40.678	11
Myelin basic protein	MBP		-1.61962	0.00961608	aging;anatomical structure development;axon ensheathment;biological regulation;cell communication;cell-cell signaling;cellular component organization;cellular component organization or biogenesis;cellular process;central nervous system development;developmental process;ensheathment of neurons;immune response;immune system process;membrane organization;myelination;negative regulation of axonogenes…	structural constituent of myelin sheath;structural molecule activity	axon part;cell body;cell part;cell projection part;compact myelin;internode region of axon;intracellular membrane-bounded organelle;intracellular organelle;intracellular part;membrane;membrane-bounded organelle;neuronal cell body;nucleus;organelle;plasma membrane	P02686	750790000	1	-2.90729	P02686	Myelin basic protein	MBP	25.8211	24.5001	25.8008	25.5433	26.623	26.0963	26.4035	25.6021	26.4914	26.0924	26.5653	26.4382	27.558	27.0567	26.3661	5	5	5	16.4	16.4	16.4	33.117	0	62.727	74
Fructose-bisphosphate aldolase A	ALDOA		0.57127	0.670004	actin cytoskeleton organization;actin filament organization;actin filament-based process;alcohol biosynthetic process;alcohol catabolic process;alcohol metabolic process;anatomical structure homeostasis;ATP biosynthetic process;ATP metabolic process;biological regulation;biosynthetic process;blood coagulation;carbohydrate biosynthetic process;carbohydrate catabolic process;carbohydrate metabolic …	actin binding;aldehyde-lyase activity;binding;carbohydrate binding;carbon-carbon lyase activity;catalytic activity;cytoskeletal protein binding;fructose binding;fructose-bisphosphate aldolase activity;identical protein binding;lyase activity;monosaccharide binding;protein binding;sugar binding;tubulin binding	actin cytoskeleton;cell part;contractile fiber part;cytoplasmic membrane-bounded vesicle lumen;cytoplasmic part;cytoplasmic vesicle part;cytoskeleton;cytosol;extracellular membrane-bounded organelle;extracellular organelle;extracellular region;extracellular region part;extracellular space;extracellular vesicular exosome;I band;intracellular membrane-bounded organelle;intracellular non-membrane-bo…	P04075	33695000	0.220474	0.882004	P04075	Fructose-bisphosphate aldolase A	ALDOA	21.1436	22.6591	21.4697	19.9958	21.3006	20.0981	21.6847	21.2502	21.5653	21.161	21.7136	20.4644	20.2763	21.6773	21.6049	5	5	5	13.7	13.7	13.7	39.42	0	53.191	7
Glyceraldehyde-3-phosphate dehydrogenase	GAPDH		0.126118	0.372336	alcohol biosynthetic process;alcohol metabolic process;apoptosis;biological regulation;biosynthetic process;carbohydrate biosynthetic process;carbohydrate metabolic process;cell death;cellular biosynthetic process;cellular carbohydrate biosynthetic process;cellular carbohydrate metabolic process;cellular component organization;cellular component organization at cellular level;cellular component o…	binding;catalytic activity;coenzyme binding;cofactor binding;cytoskeletal protein binding;glyceraldehyde-3-phosphate dehydrogenase (NAD+) (phosphorylating) activity;identical protein binding;microtubule binding;NAD binding;NADP binding;nucleotide binding;oxidoreductase activity;oxidoreductase activity, acting on the aldehyde or oxo group of donors;oxidoreductase activity, acting on the aldehyde o…	cell part;cytoplasm;cytoplasmic part;cytoskeleton;cytosol;extracellular membrane-bounded organelle;extracellular organelle;extracellular region part;extracellular vesicular exosome;intracellular membrane-bounded organelle;intracellular non-membrane-bounded organelle;intracellular organelle;intracellular organelle part;intracellular part;lipid particle;macromolecular complex;membrane;membrane-boun…	P04406	61274000	0.472058	0.20363	P04406	Glyceraldehyde-3-phosphate dehydrogenase	GAPDH	21.9425	22.6058	22.2049	22.0006	20.178	22.344	22.6704	22.811	22.3294	22.3106	22.4099	22.7453	20.9507	22.7831	22.641	4	4	4	20	20	20	36.053	0	79.472	32
Sodium/potassium-transporting ATPase subunit alpha-1	ATP1A1		0.447072	0.727353	ATP hydrolysis coupled proton transport;biological regulation;cardiac muscle contraction;cation homeostasis;cation transport;cellular cation homeostasis;cellular chemical homeostasis;cellular homeostasis;cellular ion homeostasis;cellular metal ion homeostasis;cellular monovalent inorganic cation homeostasis;cellular potassium ion homeostasis;cellular potassium ion transport;cellular process;cellu…	active transmembrane transporter activity;adenyl nucleotide binding;adenyl ribonucleotide binding;ADP binding;alkali metal ion binding;ATP binding;ATPase activity;ATPase activity, coupled;ATPase activity, coupled to movement of substances;ATPase activity, coupled to transmembrane movement of ions;ATPase activity, coupled to transmembrane movement of ions, phosphorylative mechanism;ATPase activity…	apical plasma membrane;basolateral plasma membrane;caveola;cell part;cytoplasmic membrane-bounded vesicle;cytoplasmic part;cytoplasmic vesicle;endoplasmic reticulum;endosome;extracellular membrane-bounded organelle;extracellular organelle;extracellular region part;extracellular space;extracellular vesicular exosome;Golgi apparatus;integral to membrane;integral to plasma membrane;intracellular mem…	P05023	289770000	0.180842	0.998155	P05023;P20648	Sodium/potassium-transporting ATPase subunit alpha-1	ATP1A1	24.9563	24.7776	24.6017	24.6561	24.8075	24.694	24.1081	24.163	24.3984	24.458	24.5029	24.4378	24.968	23.4969	24.5295	20	20	11	24.2	24.2	11.4	112.89	0	323.31	109
Sodium/potassium-transporting ATPase subunit beta-1	ATP1B1		-0.888813	0.000766628	biological adhesion;biological regulation;blood coagulation;calcium ion homeostasis;calcium-mediated signaling;cardiac muscle contraction;cation homeostasis;cation transport;cell adhesion;cell migration;cell motility;cellular calcium ion homeostasis;cellular cation homeostasis;cellular chemical homeostasis;cellular component movement;cellular component organization;cellular component organization…	active transmembrane transporter activity;antigen binding;ATPase activator activity;ATPase activity;ATPase activity, coupled;ATPase activity, coupled to movement of substances;ATPase activity, coupled to transmembrane movement of ions;ATPase activity, coupled to transmembrane movement of ions, phosphorylative mechanism;ATPase activity, coupled to transmembrane movement of substances;ATPase bindin…	apical plasma membrane;basolateral plasma membrane;caveola;cell junction;cell part;cell-cell contact zone;cell-cell junction;extracellular membrane-bounded organelle;extracellular organelle;extracellular region part;extracellular vesicular exosome;intercalated disc;macromolecular complex;membrane;membrane part;membrane raft;membrane-bounded organelle;membrane-bounded vesicle;organelle;plasma memb…	P05026	28556000	0.999702	-6.1588	P05026	Sodium/potassium-transporting ATPase subunit beta-1	ATP1B1	21.3232	20.9242	21.3424	21.3228	21.6997	21.4333	21.6206	21.1465	19.5022	21.5807	21.6811	21.5817	22.0026	22.1667	22.087	3	3	3	12.5	12.5	12.5	35.061	0	23.406	4
60S acidic ribosomal protein P1	RPLP1		1.55079	0.776227	biosynthetic process;catabolic process;cellular biosynthetic process;cellular catabolic process;cellular component disassembly;cellular component disassembly at cellular level;cellular component organization;cellular component organization at cellular level;cellular component organization or biogenesis;cellular component organization or biogenesis at cellular level;cellular macromolecular complex…	binding;nucleic acid binding;RNA binding;structural constituent of ribosome;structural molecule activity	adherens junction;anchoring junction;cell junction;cell part;cell-substrate adherens junction;cell-substrate junction;cytoplasm;cytoplasmic part;cytosol;cytosolic large ribosomal subunit;extracellular membrane-bounded organelle;extracellular organelle;extracellular region part;extracellular vesicular exosome;focal adhesion;intracellular organelle part;intracellular part;large ribosomal subunit;ma…	P05386	170210000	0.153262	1.09554	P05386	60S acidic ribosomal protein P1	RPLP1	23.9888	20.6119	24.1185	23.3805	19.5502	24.1685	23.7463	24.0581	24.0896	24.9145	24.6634	24.6262	20.4745	20.5811	23.0113	2	2	2	51.8	51.8	51.8	11.514	0	80.289	27
60S acidic ribosomal protein P2	RPLP2		0.801001	0.967415	biosynthetic process;catabolic process;cellular biosynthetic process;cellular catabolic process;cellular component disassembly;cellular component disassembly at cellular level;cellular component organization;cellular component organization at cellular level;cellular component organization or biogenesis;cellular component organization or biogenesis at cellular level;cellular macromolecular complex…	binding;nucleic acid binding;RNA binding;structural constituent of ribosome;structural molecule activity	adherens junction;anchoring junction;cell junction;cell part;cell-substrate adherens junction;cell-substrate junction;cytoplasmic part;cytosol;cytosolic large ribosomal subunit;extracellular membrane-bounded organelle;extracellular organelle;extracellular region part;extracellular vesicular exosome;focal adhesion;intracellular organelle part;intracellular part;large ribosomal subunit;macromolecul…	P05387	368370000	0.0833043	1.4697	P05387	60S acidic ribosomal protein P2	RPLP2	24.8733	23.7953	25.5497	24.5908	24.8418	25.1418	25.3337	25.0905	25.5042	25.9887	25.4604	25.5587	24.2711	23.9308	23.6135	5	5	5	66.1	66.1	66.1	11.665	0	198.24	66
Alpha-enolase	ENO1		-0.350913	0.135665	alcohol biosynthetic process;alcohol metabolic process;biological regulation;biosynthetic process;carbohydrate biosynthetic process;carbohydrate metabolic process;cellular biosynthetic process;cellular carbohydrate biosynthetic process;cellular carbohydrate metabolic process;cellular macromolecule biosynthetic process;cellular macromolecule metabolic process;cellular metabolic process;cellular ni…	binding;carbon-oxygen lyase activity;catalytic activity;cation binding;DNA binding;enzyme binding;GTPase binding;hydro-lyase activity;ion binding;lyase activity;magnesium ion binding;metal ion binding;nucleic acid binding;nucleic acid binding transcription factor activity;phosphopyruvate hydratase activity;protein binding;protein binding transcription factor activity;sequence-specific DNA binding…	cell part;contractile fiber part;cytoplasm;cytoplasmic part;cytosol;cytosolic part;extracellular membrane-bounded organelle;extracellular organelle;extracellular region part;extracellular space;extracellular vesicular exosome;intracellular membrane-bounded organelle;intracellular organelle;intracellular part;M band;macromolecular complex;membrane;membrane-bounded organelle;membrane-bounded vesicl…	P06733	44024000	0.801687	-0.675154	P06733	Alpha-enolase	ENO1	21.0782	22.6404	21.429	21.2335	21.8633	21.7669	23.1593	21.0838	21.6305	21.2909	20.3062	21.6972	22.2476	22.3141	21.6386	5	5	5	13.4	13.4	13.4	47.168	0	79.814	12
Neurofilament light polypeptide	NEFL		-0.960052	0.0137916	anatomical structure morphogenesis;anterograde axon cargo transport;axon cargo transport;axon regeneration;axon transport of mitochondrion;axonogenesis;biological regulation;cell communication;cell part morphogenesis;cell projection morphogenesis;cell projection organization;cell-cell signaling;cellular component assembly;cellular component assembly at cellular level;cellular component morphogene…	binding;binding, bridging;identical protein binding;protein binding;protein binding, bridging;protein C-terminus binding;structural constituent of cytoskeleton;structural molecule activity	axon;axon part;cell part;cell projection;cell projection part;cytoplasm;cytoplasmic part;cytoskeletal part;cytosol;growth cone;intermediate filament;intracellular organelle part;intracellular part;macromolecular complex;neurofilament;neuron projection;organelle part;protein complex;site of polarized growth	P07196	93907000	1	-2.56186	P07196	Neurofilament light polypeptide	NEFL	22.9473	22.2266	23.1652	22.3179	23.5931	23.4038	23.06	22.759	23.8053	22.9722	23.7205	23.4013	24.2207	23.5799	23.4185	10	10	7	19.5	19.5	14.4	61.516	0	68.056	39
Heat shock protein HSP 90-beta	HSP90AB1		-0.121737	0.21697	actin cytoskeleton organization;actin filament organization;actin filament-based process;actin rod assembly;activation of immune response;activation of innate immune response;anatomical structure development;axon guidance;biological regulation;catabolic process;cellular catabolic process;cellular component assembly;cellular component assembly at cellular level;cellular component organization;cell…	adenyl nucleotide binding;adenyl ribonucleotide binding;antigen binding;ATP binding;binding;calcium ion binding;cation binding;double-stranded RNA binding;enzyme binding;enzyme regulator activity;ion binding;kinase binding;lipoprotein particle receptor binding;low-density lipoprotein particle receptor binding;metal ion binding;MHC class II protein complex binding;MHC protein complex binding;nitri…	adherens junction;anchoring junction;cell junction;cell part;cell-substrate adherens junction;cell-substrate junction;cytoplasm;cytoplasmic membrane-bounded vesicle;cytoplasmic membrane-bounded vesicle lumen;cytoplasmic part;cytoplasmic vesicle;cytoplasmic vesicle part;cytosol;endocytic vesicle lumen;endoplasmic reticulum;endoplasmic reticulum lumen;endoplasmic reticulum membrane;endoplasmic reti…	P08238	53718000	0.682298	-0.289696	P08238;Q58FF8;Q14568;P14625	Heat shock protein HSP 90-beta	HSP90AB1	22.3176	22.9912	21.9076	22.1757	22.3517	22.1388	22.5581	21.9306	22.5577	22.3946	22.7608	22.4387	22.8363	22.7712	21.9741	5	5	4	9.8	9.8	8.1	83.263	0	51.586	47
78 kDa glucose-regulated protein	HSPA5		1.67172	0.940796	activation of signaling protein activity involved in unfolded protein response;anatomical structure arrangement;anatomical structure development;biological regulation;blood coagulation;catabolic process;cell activation;cell communication;cellular catabolic process;cellular macromolecule catabolic process;cellular macromolecule metabolic process;cellular metabolic process;cellular process;cellular…	adenyl nucleotide binding;adenyl ribonucleotide binding;ATP binding;ATPase activity;binding;calcium ion binding;catalytic activity;cation binding;chaperone binding;enzyme binding;glycoprotein binding;hydrolase activity;hydrolase activity, acting on acid anhydrides;hydrolase activity, acting on acid anhydrides, in phosphorus-containing anhydrides;ion binding;metal ion binding;misfolded protein bin…	adherens junction;anchoring junction;cell junction;cell part;cell surface;cell-substrate adherens junction;cell-substrate junction;cytoplasmic membrane-bounded vesicle;cytoplasmic part;cytoplasmic vesicle;endoplasmic reticulum;endoplasmic reticulum chaperone complex;endoplasmic reticulum lumen;endoplasmic reticulum membrane;endoplasmic reticulum part;endoplasmic reticulum-Golgi intermediate compa…	P11021	165190000	0.0917949	1.41786	P11021	78 kDa glucose-regulated protein	HSPA5	23.9132	24.0116	23.7738	23.5479	23.4634	23.1182	23.6249	23.9731	24.0794	24.3348	23.9989	23.872	19.8773	23.5141	23.2921	13	12	12	22.8	22.8	22.8	72.332	0	163.04	64
Pyruvate kinase PKM;Pyruvate kinase PKLR	PKM;PKLR		-0.495279	0.0741108	alcohol metabolic process;anatomical structure development;ATP biosynthetic process;ATP metabolic process;biological regulation;biosynthetic process;carbohydrate metabolic process;carboxylic acid biosynthetic process;carboxylic acid metabolic process;cell death;cellular biosynthetic process;cellular carbohydrate metabolic process;cellular ketone metabolic process;cellular metabolic process;cellul…	adenyl nucleotide binding;adenyl ribonucleotide binding;alkali metal ion binding;antigen binding;ATP binding;binding;catalytic activity;cation binding;ion binding;kinase activity;magnesium ion binding;metal ion binding;MHC class II protein complex binding;MHC protein complex binding;nucleotide binding;phosphotransferase activity, alcohol group as acceptor;potassium ion binding;purine nucleotide b…	cell part;cell projection;cilium;cytoplasm;cytoplasmic part;cytosol;extracellular matrix;extracellular membrane-bounded organelle;extracellular organelle;extracellular region part;extracellular vesicular exosome;intracellular membrane-bounded organelle;intracellular organelle;intracellular part;membrane;membrane-bounded organelle;membrane-bounded vesicle;mitochondrion;nucleus;organelle;plasma mem…	P14618;P30613	17056000	0.94104	-1.15126	P14618;P30613	Pyruvate kinase PKM;Pyruvate kinase PKLR	PKM;PKLR	20.5717	21.0339	20.7839	20.5227	20.5955	20.4396	21.4093	20.4281	19.8825	20.7585	20.952	20.9762	20.5176	21.9073	21.4505	2	2	2	4.5	4.5	4.5	57.936	0	20.864	8
Desmoplakin	DSP		-1.56491	0.00654504	adherens junction organization;anatomical structure development;anatomical structure morphogenesis;apoptosis;cardiac muscle tissue morphogenesis;cell death;cell differentiation;cell junction organization;cell-cell junction organization;cellular component disassembly;cellular component disassembly at cellular level;cellular component disassembly involved in apoptosis;cellular component organizatio…	binding;binding, bridging;enzyme binding;kinase binding;protein binding;protein binding, bridging;protein kinase binding;protein kinase C binding;scaffold protein binding;structural constituent of cytoskeleton;structural molecule activity	adherens junction;anchoring junction;basolateral plasma membrane;cell junction;cell part;cell-cell adherens junction;cell-cell contact zone;cell-cell junction;cornified envelope;cytoplasmic part;cytoskeletal part;cytoskeleton;desmosome;extracellular membrane-bounded organelle;extracellular organelle;extracellular region part;extracellular vesicular exosome;fascia adherens;intercalated disc;interm…	P15924	89330000	1	-3.30066	P15924	Desmoplakin	DSP	19.2547	19.8245	19.7345	22.7413	21.0763	20.7775	25.2293	25.6409	19.0858	19.4673	19.541	20.1402	20.9224	20.5617	22.0242	27	27	27	9.7	9.7	9.7	331.77	0	216.76	41
E3 ubiquitin-protein ligase TRIM21	TRIM21		1.48125	0.885884	biological regulation;cell cycle;cell surface receptor linked signaling pathway;cellular component assembly;cellular component organization;cellular component organization or biogenesis;cellular macromolecule metabolic process;cellular metabolic process;cellular process;cellular protein metabolic process;cellular response to chemical stimulus;cellular response to cytokine stimulus;cellular respon…	acid-amino acid ligase activity;binding;catalytic activity;cation binding;DNA binding;identical protein binding;ion binding;ligase activity;ligase activity, forming carbon-nitrogen bonds;metal ion binding;nucleic acid binding;protein binding;RNA binding;small conjugating protein ligase activity;transition metal ion binding;ubiquitin-protein ligase activity;zinc ion binding	cell part;cytoplasm;cytoplasmic mRNA processing body;cytoplasmic part;cytosol;intracellular membrane-bounded organelle;intracellular non-membrane-bounded organelle;intracellular organelle;intracellular organelle part;intracellular part;macromolecular complex;membrane-bounded organelle;non-membrane-bounded organelle;nuclear part;nucleoplasm;nucleus;organelle;organelle part;ribonucleoprotein comple…	P19474	117120000	0.10735	1.31084	P19474	E3 ubiquitin-protein ligase TRIM21	TRIM21	23.2024	23.7479	23.1672	22.8574	22.5	20.2438	23.3765	23.1276	23.5248	24.204	23.2821	23.0458	22.7484	19.6812	23.2442	8	8	8	16	16	16	54.169	0	76.761	33
Cofilin-1	CFL1		1.02242	0.88013	actin cytoskeleton organization;actin filament depolymerization;actin filament organization;actin filament-based process;actin polymerization or depolymerization;actomyosin structure organization;ameboidal cell migration;anatomical structure homeostasis;anatomical structure morphogenesis;axon guidance;biological regulation;blood coagulation;cell activation;cell cycle cytokinesis;cell cycle proces…		actin cytoskeleton;adherens junction;anchoring junction;cell cortex part;cell junction;cell part;cell projection membrane;cell projection part;cell-cell junction;cell-substrate adherens junction;cell-substrate junction;contractile fiber part;cortical actin cytoskeleton;cortical cytoskeleton;cytoplasm;cytoplasmic part;cytoskeletal part;cytoskeleton;extracellular membrane-bounded organelle;extracel…	P23528	45531000	0.108832	1.29961	P23528;Q9Y281	Cofilin-1	CFL1	21.5463	23.1139	21.833	21.476	21.5451	21.404	22.0293	21.4848	21.6691	21.5435	21.8084	22.0151	21.7296	19.8989	21.7974	4	4	4	27.1	27.1	27.1	18.502	0	49.773	11
Eukaryotic translation initiation factor 4B	EIF4B		-0.38545	0.0112597	biological regulation;biosynthetic process;catabolic process;cell surface receptor linked signaling pathway;cellular biosynthetic process;cellular catabolic process;cellular macromolecule biosynthetic process;cellular macromolecule catabolic process;cellular macromolecule metabolic process;cellular metabolic process;cellular nitrogen compound metabolic process;cellular process;cellular protein me…	binding;nucleic acid binding;nucleotide binding;RNA binding;translation factor activity, nucleic acid binding;translation initiation factor activity	cell part;cytoplasmic part;cytosol;eukaryotic translation initiation factor 4F complex;intracellular part;macromolecular complex;protein complex	P23588	839780000	1	-2.75357	P23588	Eukaryotic translation initiation factor 4B	EIF4B	26.0545	26.0594	26.3213	26.2244	26.7332	26.1365	25.6378	25.2649	26.5284	26.094	25.9758	26.3226	26.5721	26.3249	26.6946	25	25	25	40.8	40.8	40.8	69.15	0	323.31	135
ATP synthase F(0) complex subunit B1, mitochondrial	ATP5F1		1.24431	0.881505	anatomical structure development;ATP biosynthetic process;ATP metabolic process;ATP synthesis coupled proton transport;biosynthetic process;cation transport;cellular biosynthetic process;cellular metabolic process;cellular nitrogen compound biosynthetic process;cellular nitrogen compound metabolic process;cellular process;developmental process;electron transport chain;energy coupled proton transp…	cation transmembrane transporter activity;hydrogen ion transmembrane transporter activity;inorganic cation transmembrane transporter activity;ion transmembrane transporter activity;monovalent inorganic cation transmembrane transporter activity;substrate-specific transmembrane transporter activity;substrate-specific transporter activity;transmembrane transporter activity;transporter activity	cell part;cytoplasmic part;extracellular membrane-bounded organelle;extracellular organelle;extracellular region part;extracellular vesicular exosome;intracellular membrane-bounded organelle;intracellular organelle;intracellular organelle lumen;intracellular organelle part;intracellular part;macromolecular complex;membrane;membrane part;membrane-bounded organelle;membrane-bounded vesicle;membrane…	P24539	89249000	0.108613	1.3023	P24539	ATP synthase F(0) complex subunit B1, mitochondrial	ATP5F1	23.2787	23.3877	23.0418	22.9845	22.9201	22.7167	22.3529	22.4779	22.9769	22.455	22.8218	22.801	23.3856	20.1766	22.413	6	6	6	25.4	25.4	25.4	28.908	0	126.49	28
60S ribosomal protein L13	RPL13		1.1091	0.780809	biosynthetic process;catabolic process;cellular biosynthetic process;cellular catabolic process;cellular component disassembly;cellular component disassembly at cellular level;cellular component organization;cellular component organization at cellular level;cellular component organization or biogenesis;cellular component organization or biogenesis at cellular level;cellular macromolecular complex…	binding;nucleic acid binding;RNA binding;structural constituent of ribosome;structural molecule activity	cell part;cytoplasm;cytoplasmic part;cytosol;cytosolic large ribosomal subunit;cytosolic part;cytosolic ribosome;intracellular membrane-bounded organelle;intracellular non-membrane-bounded organelle;intracellular organelle;intracellular organelle part;intracellular part;large ribosomal subunit;macromolecular complex;membrane;membrane-bounded organelle;non-membrane-bounded organelle;nuclear part;n…	P26373	74813000	0.151504	1.10462	P26373	60S ribosomal protein L13	RPL13	21.7776	23.064	22.4101	20.1924	19.6108	22.6431	23.1258	22.643	22.592	23.5566	24.5289	23.9451	20.2616	20.4937	23.169	8	8	8	28	28	28	24.261	0	123.74	26
CAD protein;Glutamine-dependent carbamoyl-phosphate synthase;Aspartate carbamoyltransferase;Dihydroorotase	CAD		0.466091	0.897934	amide biosynthetic process;amine biosynthetic process;amine catabolic process;amine metabolic process;anatomical structure development;anatomical structure morphogenesis;arginine biosynthetic process;arginine metabolic process;biological regulation;biosynthetic process;body fluid secretion;carbamoyl phosphate biosynthetic process;carbamoyl phosphate metabolic process;carboxylic acid biosynthetic …	adenyl nucleotide binding;adenyl ribonucleotide binding;amine binding;amino acid binding;aspartate binding;aspartate carbamoyltransferase activity;ATP binding;binding;carbamoyl-phosphate synthase (ammonia) activity;carbamoyl-phosphate synthase (glutamine-hydrolyzing) activity;carbon-nitrogen ligase activity, with glutamine as amido-N-donor;carboxyl- or carbamoyltransferase activity;carboxylic aci…	axon part;cell body;cell part;cell projection;cell projection part;cytoplasmic part;cytosol;extracellular membrane-bounded organelle;extracellular organelle;extracellular region part;extracellular vesicular exosome;intracellular membrane-bounded organelle;intracellular organelle;intracellular organelle part;intracellular part;macromolecular complex;membrane;membrane-bounded organelle;membrane-bou…	P27708	14050000	0.103377	1.33435	P27708	CAD protein;Glutamine-dependent carbamoyl-phosphate synthase;Aspartate carbamoyltransferase;Dihydroorotase	CAD	21.0482	21.2339	20.8657	20.6461	20.6254	20.8727	19.8656	20.2672	19.7487	20.6007	20.6504	19.5283	20.8963	20.9351	19.9181	4	4	4	2.2	2.2	2.2	242.98	0	29.085	10
Myristoylated alanine-rich C-kinase substrate	MARCKS		-0.637605	0.158348	biological regulation;cellular metabolic process;cellular process;energy derivation by oxidation of organic compounds;energy reserve metabolic process;generation of precursor metabolites and energy;metabolic process;oxidation-reduction process;regulation of biological process;regulation of cell communication;regulation of cellular localization;regulation of cellular process;regulation of hormone …	actin binding;actin filament binding;binding;calmodulin binding;cytoskeletal protein binding;protein binding	actin cytoskeleton;adherens junction;anchoring junction;cell cortex;cell junction;cell part;cell-substrate adherens junction;cell-substrate junction;centrosome;cytoplasmic part;cytoskeletal part;cytoskeleton;extracellular membrane-bounded organelle;extracellular organelle;extracellular region part;extracellular vesicular exosome;female germ cell nucleus;focal adhesion;germ cell nucleus;germinal v…	P29966	42119000	0.763476	-0.550837	P29966	Myristoylated alanine-rich C-kinase substrate	MARCKS	18.8098	21.177	22.5586	21.768	22.4342	21.9827	22.0652	22.646	23.0299	22.9864	21.0108	19.6665	22.2354	21.047	21.1758	4	4	4	14.8	14.8	14.8	31.554	0	35.084	12
ATP synthase subunit delta, mitochondrial	ATP5D		1.10189	0.897971	ATP biosynthetic process;ATP metabolic process;ATP synthesis coupled proton transport;biosynthetic process;cation transport;cellular biosynthetic process;cellular metabolic process;cellular nitrogen compound biosynthetic process;cellular nitrogen compound metabolic process;cellular process;electron transport chain;energy coupled proton transport, down electrochemical gradient;establishment of loc…	active transmembrane transporter activity;ATPase activity;ATPase activity, coupled;ATPase activity, coupled to movement of substances;ATPase activity, coupled to transmembrane movement of ions;ATPase activity, coupled to transmembrane movement of substances;catalytic activity;cation transmembrane transporter activity;cation-transporting ATPase activity;hydrogen ion transmembrane transporter activ…	cell part;cytoplasmic part;intracellular membrane-bounded organelle;intracellular organelle;intracellular organelle lumen;intracellular organelle part;intracellular part;macromolecular complex;membrane;membrane part;membrane-bounded organelle;membrane-enclosed lumen;mitochondrial inner membrane;mitochondrial matrix;mitochondrial membrane;mitochondrial membrane part;mitochondrial part;mitochondria…	P30049	94594000	0.104231	1.33442	P30049	ATP synthase subunit delta, mitochondrial	ATP5D	23.366	22.7971	23.1589	23.3134	20.1509	20.6398	23.0762	23.2465	23.2396	22.9502	21.6339	23.1081	22.8966	20.3907	22.7291	3	3	3	17.3	17.3	17.3	17.49	0	59.619	26
Protein S100-A7;Protein S100-A7A	S100A7;S100A7A		-0.551159	0.0147971	anatomical structure development;anatomical structure formation involved in morphogenesis;angiogenesis;biological regulation;cell differentiation;cellular developmental process;cellular process;defense response;defense response to bacterium;defense response to Gram-negative bacterium;developmental process;epidermal cell differentiation;epidermis development;epithelial cell differentiation;immune …	binding;calcium ion binding;cation binding;ion binding;metal ion binding;protein binding;protein self-association;RAGE receptor binding;receptor binding;transition metal ion binding;zinc ion binding	adherens junction;anchoring junction;cell junction;cell part;cell-substrate adherens junction;cell-substrate junction;cytoplasm;cytoplasmic part;cytosol;endoplasmic reticulum;extracellular membrane-bounded organelle;extracellular organelle;extracellular region;extracellular region part;extracellular vesicular exosome;focal adhesion;intracellular membrane-bounded organelle;intracellular organelle;…	P31151;Q86SG5	80207000	1	-2.4968	P31151;Q86SG5	Protein S100-A7;Protein S100-A7A	S100A7;S100A7A	22.2609	22.6588	22.172	22.1759	23.6184	23.8855	22.0599	21.701	22.4257	22.2695	22.2857	23.3764	23.0952	23.0587	22.5912	7	7	7	48.5	48.5	48.5	11.471	0	57.41	25
S-adenosylmethionine synthase isoform type-2	MAT2A		0.263732	0.512247	amine biosynthetic process;amine metabolic process;biosynthetic process;carboxylic acid biosynthetic process;carboxylic acid metabolic process;cellular amine metabolic process;cellular amino acid biosynthetic process;cellular amino acid metabolic process;cellular biosynthetic process;cellular ketone metabolic process;cellular metabolic process;cellular modified amino acid biosynthetic process;cel…	adenyl nucleotide binding;adenyl ribonucleotide binding;ATP binding;binding;catalytic activity;cation binding;ion binding;metal ion binding;methionine adenosyltransferase activity;nucleotide binding;purine nucleotide binding;purine ribonucleoside triphosphate binding;purine ribonucleotide binding;ribonucleotide binding;transferase activity;transferase activity, transferring alkyl or aryl (other t…	cell part;cytoplasmic part;cytosol;intracellular part;macromolecular complex;methionine adenosyltransferase complex;protein complex	P31153	16961000	0.345412	0.544757	P31153	S-adenosylmethionine synthase isoform type-2	MAT2A	21.4397	21.142	20.7152	20.8878	20.0138	19.8145	20.9353	20.8281	20.7311	21.6218	19.6175	21.1071	21.5697	20.0607	20.8754	3	3	3	9.6	9.6	9.6	43.66	0	36.277	15
Excitatory amino acid transporter 2	SLC1A2		-2.20081	0.003909	acidic amino acid transport;adult behavior;aging;amine transport;amino acid import;amino acid transport;anatomical structure development;anion transport;aspartate transport;behavior;biological regulation;carboxylic acid transport;cell communication;cell-cell signaling;cellular process;cellular response to external stimulus;cellular response to extracellular stimulus;cellular response to stimulus;…	acidic amino acid transmembrane transporter activity;active transmembrane transporter activity;amine transmembrane transporter activity;amino acid transmembrane transporter activity;anion transmembrane transporter activity;anion:cation symporter activity;carboxylic acid transmembrane transporter activity;cation transmembrane transporter activity;cation:amino acid symporter activity;dicarboxylic a…	axolemma;axon part;cell part;cell projection membrane;cell projection part;integral to membrane;intrinsic to membrane;leading edge membrane;membrane;membrane part;neuron projection membrane;plasma membrane;plasma membrane part	P43004	100890000	1	-3.87476	P43004	Excitatory amino acid transporter 2	SLC1A2	22.2393	21.9124	22.9723	22.813	24.2571	23.8279	19.5341	22.0601	23.3921	18.7871	20.8142	19.7239	25.301	24.7403	23.6851	2	2	2	8.7	8.7	8.7	62.104	0	178.74	30
26S protease regulatory subunit 6B	PSMC4		1.03472	1.09193	activation of immune response;activation of innate immune response;anaphase-promoting complex-dependent proteasomal ubiquitin-dependent protein catabolic process;anatomical structure development;antigen processing and presentation;antigen processing and presentation of exogenous antigen;antigen processing and presentation of exogenous peptide antigen;antigen processing and presentation of exogeno…	adenyl nucleotide binding;adenyl ribonucleotide binding;ATP binding;ATPase activity;binding;catalytic activity;hydrolase activity;hydrolase activity, acting on acid anhydrides;hydrolase activity, acting on acid anhydrides, in phosphorus-containing anhydrides;nucleoside-triphosphatase activity;nucleotide binding;protein binding;purine nucleotide binding;purine ribonucleoside triphosphate binding;p…	cell part;cytoplasm;cytoplasmic part;cytosol;cytosolic part;cytosolic proteasome complex;inclusion body;intracellular membrane-bounded organelle;intracellular organelle;intracellular organelle part;intracellular part;macromolecular complex;membrane;membrane-bounded organelle;nuclear part;nuclear proteasome complex;nucleoplasm;nucleus;organelle;organelle part;proteasome accessory complex;proteasom…	P43686	84079000	0.0551776	1.71313	P43686	26S protease regulatory subunit 6B	PSMC4	22.8213	23.6193	23.0216	22.9323	22.4748	22.2345	21.926	22.4351	22.8565	22.1882	22.496	22.2085	22.4998	21.0272	22.8311	10	10	10	27.5	27.5	27.5	47.366	0	90.758	24
Coatomer subunit alpha;Xenin;Proxenin	COPA		1.10726	1.06946	biological regulation;body fluid secretion;cellular component organization;cellular component organization at cellular level;cellular component organization or biogenesis;cellular component organization or biogenesis at cellular level;cellular process;COPI coating of Golgi vesicle;digestive system process;establishment of localization;establishment of localization in cell;establishment of protein…	structural molecule activity	cell part;COPI vesicle coat;cytoplasm;cytoplasmic part;cytoplasmic vesicle part;cytosol;extracellular membrane-bounded organelle;extracellular organelle;extracellular region part;extracellular space;extracellular vesicular exosome;Golgi apparatus part;intracellular organelle part;intracellular part;macromolecular complex;membrane;membrane coat;membrane part;membrane-bounded organelle;membrane-bou…	P53621	19910000	0.0590545	1.66902	P53621	Coatomer subunit alpha;Xenin;Proxenin	COPA	21.7612	22.0345	21.1773	21.2864	20.3857	21.7532	20.8739	19.4994	19.6871	20.0082	21.2615	20.3215	21.7508	20.1689	19.7314	5	5	5	5.7	5.7	5.7	138.34	0	32.898	9
ATP synthase subunit e, mitochondrial	ATP5I		1.33902	1.07921	ATP biosynthetic process;ATP metabolic process;ATP synthesis coupled proton transport;biosynthetic process;cation transport;cellular biosynthetic process;cellular metabolic process;cellular nitrogen compound biosynthetic process;cellular nitrogen compound metabolic process;cellular process;electron transport chain;energy coupled proton transport, down electrochemical gradient;establishment of loc…	cation transmembrane transporter activity;hydrogen ion transmembrane transporter activity;inorganic cation transmembrane transporter activity;ion transmembrane transporter activity;monovalent inorganic cation transmembrane transporter activity;substrate-specific transmembrane transporter activity;substrate-specific transporter activity;transmembrane transporter activity;transporter activity	cell part;cytoplasmic part;intracellular membrane-bounded organelle;intracellular organelle;intracellular organelle part;intracellular part;macromolecular complex;membrane;membrane part;membrane-bounded organelle;mitochondrial inner membrane;mitochondrial membrane;mitochondrial membrane part;mitochondrial part;mitochondrial proton-transporting ATP synthase complex;mitochondrial proton-transportin…	P56385	101800000	0.0579259	1.68814	P56385	ATP synthase subunit e, mitochondrial	ATP5I	23.5999	23.5696	23.0554	23.4586	22.7054	20.0653	22.4633	22.7524	22.6348	23.5989	22.7946	23.1737	22.6183	20.5427	23.0469	4	4	4	42	42	42	7.9331	0	30.127	25
Myelin proteolipid protein	PLP1		-0.941505	0.0985845	anatomical structure development;astrocyte development;axon ensheathment;axon ensheathment in central nervous system;biological regulation;biosynthetic process;carboxylic acid biosynthetic process;carboxylic acid metabolic process;cell communication;cell development;cell maturation;cell surface receptor linked signaling pathway;cell-cell signaling;cellular biosynthetic process;cellular developmen…	structural constituent of myelin sheath;structural molecule activity	cell part;integral to membrane;intrinsic to membrane;membrane;membrane part;myelin sheath;plasma membrane	P60201	31876000	0.881557	-0.927518	P60201	Myelin proteolipid protein	PLP1	21.5158	20.1517	21.5614	19.3836	22.5666	21.5714	19.0889	21.3205	22.2491	20.3279	22.2921	22.045	23.0031	22.8372	20.2131	3	3	3	11.6	11.6	11.6	30.077	0	19.05	17
Myosin light polypeptide 6	MYL6		1.89154	0.905611	actin filament-based movement;actin filament-based process;actin-mediated cell contraction;actin-myosin filament sliding;anatomical structure development;axon guidance;biological regulation;cell surface receptor linked signaling pathway;cellular component movement;cellular process;cellular response to stimulus;chemotaxis;developmental process;enzyme linked receptor protein signaling pathway;ephri…	actin-dependent ATPase activity;ATPase activity;ATPase activity, coupled;binding;calcium ion binding;catalytic activity;cation binding;hydrolase activity;hydrolase activity, acting on acid anhydrides;hydrolase activity, acting on acid anhydrides, in phosphorus-containing anhydrides;ion binding;metal ion binding;motor activity;nucleoside-triphosphatase activity;pyrophosphatase activity;structural …	brush border;cell part;cell projection;contractile fiber part;cytoplasmic part;cytoskeletal part;cytosol;extracellular membrane-bounded organelle;extracellular organelle;extracellular region part;extracellular vesicular exosome;intracellular organelle part;intracellular part;macromolecular complex;membrane;membrane-bounded organelle;membrane-bounded vesicle;muscle myosin complex;myosin complex;my…	P60660	169830000	0.102633	1.34931	P60660;P14649	Myosin light polypeptide 6	MYL6	23.8239	24.4251	24.6405	23.4362	23.5779	23.4416	22.7717	23.0936	24.0614	23.4198	23.3182	23.6689	19.6444	23.7507	23.8197	7	7	7	53.6	53.6	53.6	16.93	0	151.24	41
60S ribosomal protein L27	RPL27		0	-4.34294e-08	biosynthetic process;catabolic process;cellular biosynthetic process;cellular catabolic process;cellular component disassembly;cellular component disassembly at cellular level;cellular component organization;cellular component organization at cellular level;cellular component organization or biogenesis;cellular component organization or biogenesis at cellular level;cellular macromolecular complex…	structural constituent of ribosome;structural molecule activity	adherens junction;anchoring junction;cell junction;cell part;cell-substrate adherens junction;cell-substrate junction;cytoplasmic part;cytosol;cytosolic large ribosomal subunit;extracellular membrane-bounded organelle;extracellular organelle;extracellular region part;extracellular vesicular exosome;focal adhesion;intracellular membrane-bounded organelle;intracellular non-membrane-bounded organell…	P61353	11992000	1	0	P61353	60S ribosomal protein L27	RPL27	20.2176	20.2386	19.5862	19.6006	20.4984	19.9188	21.1221	20.8905	20.0361	22.2249	22.0293	21.569	21.0941	21.154	20.0398	2	2	2	12.5	12.5	12.5	15.798	0	11.574	5
40S ribosomal protein S8	RPS8		0	-4.34294e-08	biosynthetic process;catabolic process;cellular biosynthetic process;cellular catabolic process;cellular component disassembly;cellular component disassembly at cellular level;cellular component organization;cellular component organization at cellular level;cellular component organization or biogenesis;cellular component organization or biogenesis at cellular level;cellular macromolecular complex…	structural constituent of ribosome;structural molecule activity	adherens junction;anchoring junction;cell junction;cell part;cell-substrate adherens junction;cell-substrate junction;cytoplasm;cytoplasmic part;cytosol;cytosolic small ribosomal subunit;extracellular membrane-bounded organelle;extracellular organelle;extracellular region part;extracellular vesicular exosome;focal adhesion;intracellular membrane-bounded organelle;intracellular organelle;intracell…	P62241	10378000	1	0	P62241	40S ribosomal protein S8	RPS8	19.6521	20.5335	20.5689	20.0473	19.5059	20.5028	21.6229	20.1166	19.5206	22.0059	22.4033	21.8596	20.423	19.9166	20.5367	3	3	3	18.8	18.8	18.8	24.205	0	58.518	8
14-3-3 protein epsilon	YWHAE		-0.38304	0.20211	anatomical structure development;apoptosis;biological regulation;biosynthetic process;cell cycle;cell cycle process;cell death;cell migration;cell motility;cell surface receptor linked signaling pathway;cellular biosynthetic process;cellular chemical homeostasis;cellular component movement;cellular component organization;cellular component organization at cellular level;cellular component organiz…	amine binding;amino acid binding;antigen binding;binding;carboxylic acid binding;channel regulator activity;enzyme binding;histone deacetylase binding;ion channel binding;MHC class II protein complex binding;MHC protein complex binding;phosphoprotein binding;phosphoserine binding;potassium channel regulator activity;protein binding;protein dimerization activity;protein heterodimerization activity…	adherens junction;anchoring junction;axon;cell junction;cell part;cell projection;cell-substrate adherens junction;cell-substrate junction;cytoplasmic membrane-bounded vesicle;cytoplasmic part;cytoplasmic vesicle;cytoplasmic vesicle membrane;cytoplasmic vesicle part;cytoskeletal part;cytosol;extracellular membrane-bounded organelle;extracellular organelle;extracellular region part;extracellular v…	P62258	53796000	0.694769	-0.349699	P62258	14-3-3 protein epsilon	YWHAE	21.4876	20.9611	22.2098	21.5208	22.5232	21.823	22.753	21.8427	22.2166	21.8282	20.3263	22.3508	19.93	23.3733	22.5043	6	6	3	26.7	26.7	16.9	29.174	0	53.039	27
Histone H4	HIST1H4A		-1.0624	0.00246074	anatomical structure homeostasis;ATP-dependent chromatin remodeling;biological regulation;cell cycle;cellular component assembly;cellular component assembly at cellular level;cellular component organization;cellular component organization at cellular level;cellular component organization or biogenesis;cellular component organization or biogenesis at cellular level;cellular macromolecular complex …	binding;catalytic activity;demethylase activity;DNA binding;histone binding;histone demethylase activity;histone demethylase activity (H4-K20 specific);nucleic acid binding;protein binding	cell part;chromosomal part;chromosome;extracellular membrane-bounded organelle;extracellular organelle;extracellular region;extracellular region part;extracellular vesicular exosome;intracellular membrane-bounded organelle;intracellular non-membrane-bounded organelle;intracellular organelle;intracellular organelle part;intracellular part;macromolecular complex;membrane;membrane-bounded organelle;…	P62805	98249000	1	-4.44387	P62805	Histone H4	HIST1H4A	21.5888	21.6316	22.1633	21.7484	22.1391	22.1791	21.7964	25.3107	23.2417	24.5352	22.6984	21.8771	22.713	22.6975	23.1602	5	5	5	50.5	50.5	50.5	11.367	0	42.788	16
60S ribosomal protein L8	RPL8		-0.425133	0.133921	biosynthetic process;catabolic process;cellular biosynthetic process;cellular catabolic process;cellular component disassembly;cellular component disassembly at cellular level;cellular component organization;cellular component organization at cellular level;cellular component organization or biogenesis;cellular component organization or biogenesis at cellular level;cellular macromolecular complex…	binding;nucleic acid binding;RNA binding;rRNA binding;structural constituent of ribosome;structural molecule activity	adherens junction;anchoring junction;cell junction;cell part;cell-substrate adherens junction;cell-substrate junction;cytoplasm;cytoplasmic part;cytosol;cytosolic large ribosomal subunit;focal adhesion;intracellular non-membrane-bounded organelle;intracellular organelle;intracellular organelle part;intracellular part;large ribosomal subunit;macromolecular complex;membrane;non-membrane-bounded org…	P62917	22622000	0.798703	-0.685476	P62917	60S ribosomal protein L8	RPL8	20.1491	21.2361	19.6935	21.3433	19.1288	19.673	20.1531	20.3249	20.4012	21.9937	23.3573	21.7328	21.5176	20.7689	20.0676	3	3	3	9.3	9.3	9.3	28.024	0	21.133	6
Actin, cytoplasmic 2;Actin, cytoplasmic 2, N-terminally processed;Actin, cytoplasmic 1;Actin, cytoplasmic 1, N-terminally processed	ACTG1;ACTB		0.0417709	0.387856	actin cytoskeleton organization;actin filament-based process;actomyosin structure organization;adherens junction organization;anatomical structure development;anatomical structure homeostasis;ATP-dependent chromatin remodeling;axon guidance;biological adhesion;biological regulation;blood coagulation;cell adhesion;cell junction assembly;cell junction organization;cell surface receptor linked signa…	adenyl nucleotide binding;adenyl ribonucleotide binding;ATP binding;binding;cytoskeletal protein binding;enzyme binding;identical protein binding;kinesin binding;nitric-oxide synthase binding;nucleotide binding;protein binding;purine nucleotide binding;purine ribonucleoside triphosphate binding;purine ribonucleotide binding;ribonucleotide binding;structural constituent of cytoskeleton;structural …	adherens junction;anchoring junction;axon;blood microparticle;cell cortex;cell cortex part;cell junction;cell part;cell projection;cell-substrate adherens junction;cell-substrate junction;chromatin;chromosomal part;contractile fiber;cortical cytoskeleton;cytoplasm;cytoplasmic part;cytoskeletal part;cytoskeleton;cytosol;extracellular membrane-bounded organelle;extracellular organelle;extracellular…	P63261;P60709	1507700000	0.462145	0.244611	P63261;P60709;Q562R1;Q6S8J3;A5A3E0;P0CG38;P0CG39	Actin, cytoplasmic 2;Actin, cytoplasmic 2, N-terminally processed;Actin, cytoplasmic 1;Actin, cytoplasmic 1, N-terminally processed	ACTG1;ACTB	26.7096	27.0652	27.2165	25.9548	26.5987	26.3803	26.6197	27.5896	27.2229	26.5239	26.7113	26.7849	26.8731	26.8751	27.1177	25	25	10	72	72	42.4	41.792	0	323.31	204
Nuclease-sensitive element-binding protein 1	YBX1		1.49859	0.846603	3'-UTR-mediated mRNA stabilization;anatomical structure development;biological regulation;biosynthetic process;cellular biosynthetic process;cellular hyperosmotic response;cellular macromolecule biosynthetic process;cellular macromolecule metabolic process;cellular metabolic process;cellular nitrogen compound metabolic process;cellular process;cellular response to abiotic stimulus;cellular respon…	binding;core promoter proximal region DNA binding;core promoter proximal region sequence-specific DNA binding;DNA binding;double-stranded DNA binding;enzyme binding;GTPase binding;mRNA 3'-UTR binding;mRNA binding;nucleic acid binding;nucleic acid binding transcription factor activity;protein binding;protein binding transcription factor activity;Ras GTPase binding;regulatory region DNA binding;reg…	cell junction;cell part;cell-cell junction;CRD-mediated mRNA stability complex;cytoplasm;cytoplasmic part;extracellular membrane-bounded organelle;extracellular organelle;extracellular region part;extracellular vesicular exosome;histone pre-mRNA 3'end processing complex;intracellular membrane-bounded organelle;intracellular non-membrane-bounded organelle;intracellular organelle;intracellular orga…	P67809	39410000	0.124889	1.23407	P67809;P16989	Nuclease-sensitive element-binding protein 1	YBX1	19.6254	22.4506	22.48	19.6461	18.875	19.7906	19.7837	19.5056	22.1059	22.2768	23.514	23.1032	21.3148	20.0641	18.6813	6	6	6	35.5	35.5	35.5	35.924	0	40.813	11
Tubulin beta-4B chain	TUBB4B		0.366103	1.0044	biological regulation;cell cycle;cell cycle process;cell killing;cellular component assembly;cellular component assembly at cellular level;cellular component movement;cellular component organization;cellular component organization at cellular level;cellular component organization or biogenesis;cellular component organization or biogenesis at cellular level;cellular macromolecular complex assembly…	binding;catalytic activity;double-stranded RNA binding;GTP binding;GTPase activity;guanyl nucleotide binding;guanyl ribonucleotide binding;hydrolase activity;hydrolase activity, acting on acid anhydrides;hydrolase activity, acting on acid anhydrides, in phosphorus-containing anhydrides;MHC class I protein binding;MHC protein binding;nucleic acid binding;nucleoside-triphosphatase activity;nucleoti…	cell part;cytoplasmic part;cytoskeletal part;cytoskeleton;cytosol;extracellular membrane-bounded organelle;extracellular organelle;extracellular region part;extracellular vesicular exosome;intracellular membrane-bounded organelle;intracellular non-membrane-bounded organelle;intracellular organelle;intracellular organelle part;intracellular part;macromolecular complex;membrane-bounded organelle;me…	P68371	1218600000	0.0749735	1.5418	P68371	Tubulin beta-4B chain	TUBB4B	26.7822	26.7247	26.4302	25.9928	26.2874	26.3812	26.1493	26.2572	26.7809	26.4448	26.4788	26.6216	26.6895	26.1609	25.9883	22	22	2	50.1	50.1	3.6	49.83	0	323.31	212
Dermcidin;Survival-promoting peptide;DCD-1	DCD		-0.370332	0.208001	cell killing;defense response;defense response to bacterium;defense response to fungus;killing of cells of other organism;multi-organism process;response to bacterium;response to biotic stimulus;response to fungus;response to other organism;response to stimulus;response to stress	catalytic activity;hydrolase activity;peptidase activity	extracellular membrane-bounded organelle;extracellular organelle;extracellular region;extracellular region part;extracellular vesicular exosome;membrane-bounded organelle;membrane-bounded vesicle;organelle;vesicle	P81605	151110000	0.688732	-0.325494	P81605	Dermcidin;Survival-promoting peptide;DCD-1	DCD	23.1522	22.6903	23.17	24.9225	23.6574	24.674	23.7787	22.6501	22.5645	24.0395	22.9693	23.8763	24.3514	24.6449	21.1271	4	4	4	34.5	34.5	34.5	11.284	0	73.052	36
RNA-binding protein 10	RBM10		0.165716	0.707629	apoptosis;biological regulation;cell death;cellular component assembly;cellular component assembly at cellular level;cellular component organization;cellular component organization at cellular level;cellular component organization or biogenesis;cellular component organization or biogenesis at cellular level;cellular macromolecular complex assembly;cellular macromolecular complex subunit organizat…	binding;cation binding;DNA binding;identical protein binding;ion binding;metal ion binding;mRNA binding;nucleic acid binding;nucleotide binding;protein binding;protein complex binding;RNA binding;transition metal ion binding;zinc ion binding	cell part;intracellular membrane-bounded organelle;intracellular organelle;intracellular organelle part;intracellular part;macromolecular complex;membrane-bounded organelle;nuclear part;nucleoplasm;nucleus;organelle;organelle part;ribonucleoprotein complex;spliceosomal complex	P98175	1006500000	0.190836	0.958469	P98175;P52756;P78332	RNA-binding protein 10	RBM10	26.1934	26.1414	26.3013	26.4459	26.1004	26.7686	25.9136	26.0895	26.9483	26.7172	26.8784	26.6539	26.293	25.7296	26.1163	34	34	34	39.2	39.2	39.2	103.53	0	323.31	256
Phosphate carrier protein, mitochondrial	SLC25A3		1.96143	1.037	anion transport;cellular metabolic process;cellular process;establishment of localization;generation of precursor metabolites and energy;inorganic anion transport;ion transmembrane transport;ion transport;metabolic process;phosphate ion transmembrane transport;phosphate ion transport;transmembrane transport;transport	active transmembrane transporter activity;anion transmembrane transporter activity;binding;inorganic anion transmembrane transporter activity;ion transmembrane transporter activity;phosphate ion carrier activity;phosphate ion transmembrane transporter activity;protein binding;protein complex binding;secondary active transmembrane transporter activity;substrate-specific transmembrane transporter a…	cell part;cytoplasmic part;extracellular membrane-bounded organelle;extracellular organelle;extracellular region part;extracellular vesicular exosome;integral to membrane;integral to plasma membrane;intracellular membrane-bounded organelle;intracellular organelle;intracellular organelle part;intracellular part;intrinsic to membrane;intrinsic to plasma membrane;membrane;membrane part;membrane-boun…	Q00325	139070000	0.0669189	1.60546	Q00325	Phosphate carrier protein, mitochondrial	SLC25A3	24.0167	23.882	24.3514	23.6679	23.4223	23.8076	20.2967	22.9894	22.9929	23.0748	22.8467	22.9061	23.307	19.6947	23.3641	8	8	8	13.3	13.3	13.3	40.094	0	61.679	23
Polyadenylate-binding protein 4	PABPC4		-0.276115	0.138727	biological regulation;biosynthetic process;blood coagulation;catabolic process;cellular biosynthetic process;cellular catabolic process;cellular macromolecule biosynthetic process;cellular macromolecule catabolic process;cellular macromolecule metabolic process;cellular metabolic process;cellular nitrogen compound metabolic process;cellular process;cellular protein metabolic process;coagulation;h…	binding;mRNA binding;nucleic acid binding;nucleotide binding;poly(A) RNA binding;poly(U) RNA binding;poly-purine tract binding;poly-pyrimidine tract binding;RNA binding;single-stranded RNA binding	cell part;cytoplasm;cytoplasmic part;intracellular membrane-bounded organelle;intracellular non-membrane-bounded organelle;intracellular organelle;intracellular part;macromolecular complex;membrane-bounded organelle;non-membrane-bounded organelle;nucleus;organelle;ribonucleoprotein complex;RNA granule;stress granule	Q13310	11073000	0.800411	-0.65732	Q13310	Polyadenylate-binding protein 4	PABPC4	20.5766	19.5385	20.1728	20.6915	20.8035	20.3712	20.7374	19.4531	20.88	21.9818	21.2339	21.4323	19.9087	20.9111	20.2965	9	2	2	16.3	4	4	70.782	0	13.517	6
Protein scribble homolog	SCRIB		0	-4.34294e-08	anatomical structure development;anatomical structure formation involved in morphogenesis;anatomical structure morphogenesis;apoptosis;apoptosis involved in morphogenesis;astrocyte cell migration;asymmetric protein localization;auditory receptor cell stereocilium organization;biological adhesion;biological regulation;cell adhesion;cell death;cell migration;cell motility;cell projection organizati…		adherens junction;anchoring junction;basolateral plasma membrane;cell junction;cell part;cell projection;cell-cell adherens junction;cell-cell junction;cytoplasmic part;extracellular membrane-bounded organelle;extracellular organelle;extracellular region part;extracellular vesicular exosome;intracellular organelle part;intracellular part;lamellipodium;macromolecular complex;membrane;membrane part…	Q14160	2151400000	1	0	Q14160	Protein scribble homolog	SCRIB	19.1087	19.5908	19.6254	20.855	19.8625	20.2491	29.1151	19.5055	29.4304	30.0674	29.5012	28.9446	20.6143	21.0643	19.8948	2	2	2	1	1	1	174.88	0	11.801	11
Nodal modulator 1;Nodal modulator 3;Nodal modulator 2	NOMO1;NOMO3;NOMO2		0.780244	0.978281	biological regulation;posttranscriptional regulation of gene expression;protein destabilization;regulation of biological process;regulation of biological quality;regulation of gene expression;regulation of macromolecule metabolic process;regulation of metabolic process;regulation of protein stability	binding;carbohydrate binding	cell part;cytoplasmic part;endoplasmic reticulum membrane;endoplasmic reticulum part;integral to membrane;intracellular organelle part;intracellular part;intrinsic to membrane;membrane;membrane part;organelle membrane;organelle part	Q15155;P69849;Q5JPE7	27300000	0.0822105	1.49087	Q15155;P69849;Q5JPE7	Nodal modulator 1;Nodal modulator 3;Nodal modulator 2	NOMO1;NOMO3;NOMO2	21.6811	21.433	21.5553	21.4381	21.395	20.3471	19.7186	21.2152	21.3257	21.2399	21.4548	21.4643	20.6914	21.7136	19.9237	5	5	5	4.9	4.9	4.9	134.32	0	32.979	7
Dihydropyrimidinase-related protein 2	DPYSL2		-1.05697	0.024454	anatomical structure development;axon guidance;biological regulation;cellular component organization;cellular component organization at cellular level;cellular component organization or biogenesis;cellular component organization or biogenesis at cellular level;cellular membrane organization;cellular metabolic process;cellular nitrogen compound metabolic process;cellular process;cellular response …	catalytic activity;dihydropyrimidinase activity;hydrolase activity;hydrolase activity, acting on carbon-nitrogen (but not peptide) bonds;hydrolase activity, acting on carbon-nitrogen (but not peptide) bonds, in cyclic amides	axon part;cell body;cell part;cell projection;cell projection part;cytoplasmic part;cytoskeleton;cytosol;dendrite;extracellular membrane-bounded organelle;extracellular organelle;extracellular region part;extracellular vesicular exosome;growth cone;intracellular membrane-bounded organelle;intracellular non-membrane-bounded organelle;intracellular organelle;intracellular part;macromolecular comple…	Q16555	21219000	1	-2.0515	Q16555	Dihydropyrimidinase-related protein 2	DPYSL2	19.9002	20.0872	20.4177	20.9708	22.0859	19.6969	21.628	20.9924	20.5415	21.1097	22.2588	21.6052	20.5373	22.1567	20.882	4	4	4	9.4	9.4	9.4	62.293	0	31.57	17
Protein odr-4 homolog	ODR4		1.36569	1.02454		binding;catalytic activity;cation binding;ion binding;metal ion binding;oxidoreductase activity;transition metal ion binding;zinc ion binding	cell part;integral to membrane;intrinsic to membrane;membrane part	Q5SWX8	41798000	0.0699643	1.5811	Q5SWX8	Protein odr-4 homolog	ODR4	22.3206	21.9108	22.3307	21.8396	20.4424	20.6536	21.5919	21.6263	22.2746	22.5098	22.0551	21.7043	21.2325	22.0495	19.183	6	6	6	19.8	19.8	19.8	51.103	0	81.675	20
Methylcytosine dioxygenase TET2	TET2		1.33586	0.820383	5-methylcytosine catabolic process;5-methylcytosine metabolic process;anatomical structure development;anatomical structure morphogenesis;biological regulation;carbohydrate metabolic process;catabolic process;cell cycle;cell differentiation;cellular aromatic compound metabolic process;cellular carbohydrate metabolic process;cellular catabolic process;cellular component organization;cellular compo…	binding;catalytic activity;cation binding;dioxygenase activity;DNA binding;ferrous iron binding;ion binding;iron ion binding;metal ion binding;methylcytosine dioxygenase activity;nucleic acid binding;oxidoreductase activity;oxidoreductase activity, acting on paired donors, with incorporation or reduction of molecular oxygen;oxidoreductase activity, acting on paired donors, with incorporation or r…		Q6N021	129600000	0.133921	1.18264	Q6N021	Methylcytosine dioxygenase TET2	TET2	23.2411	24.1314	23.4742	23.2518	22.7172	22.5277	22.7699	23.3372	21.8109	23.7299	23.5347	23.3242	23.6064	20.1016	23.1311	18	18	18	12.6	12.6	12.6	223.81	0	179.02	54
Immunity-related GTPase family Q protein	IRGQ		-2.80396	0.00453952		binding;GTP binding;guanyl nucleotide binding;guanyl ribonucleotide binding;nucleotide binding;purine nucleotide binding;purine ribonucleoside triphosphate binding;purine ribonucleotide binding;ribonucleotide binding		Q8WZA9	583030000	1	-3.70214	Q8WZA9	Immunity-related GTPase family Q protein	IRGQ	24.7149	23.5384	25.0235	24.4496	25.423	25.694	25.2639	24.9217	25.9376	25.0053	25.9508	25.8274	26.1471	28.2483	27.2933	15	15	15	28.7	28.7	28.7	62.717	0	198.74	102
Bcl-2-associated transcription factor 1	BCLAF1		1.00589	0.7592	apoptosis;biological regulation;biosynthetic process;cell death;cellular biosynthetic process;cellular macromolecule biosynthetic process;cellular macromolecule metabolic process;cellular metabolic process;cellular nitrogen compound metabolic process;cellular process;cellular response to stimulus;cellular response to stress;death;macromolecule biosynthetic process;macromolecule metabolic process;…	binding;DNA binding;nucleic acid binding	cell part;cytoplasm;intracellular membrane-bounded organelle;intracellular non-membrane-bounded organelle;intracellular organelle;intracellular organelle part;intracellular part;membrane-bounded organelle;non-membrane-bounded organelle;nuclear part;nucleolus;nucleoplasm;nucleus;organelle;organelle part	Q9NYF8	112700000	0.164611	1.06175	Q9NYF8	Bcl-2-associated transcription factor 1	BCLAF1	23.4819	23.7307	23.0184	23.6661	22.8256	22.7444	22.8498	22.5875	22.4597	23.5514	23.0648	23.2297	23.0139	20.5886	23.6108	11	11	11	13.5	13.5	13.5	106.12	0	85.261	40
Calmodulin-like protein 5	CALML5		1.33177	0.756801	anatomical structure development;biological regulation;cellular process;cellular response to stimulus;developmental process;epidermis development;regulation of biological process;regulation of cellular process;response to stimulus;signal transduction;tissue development	binding;calcium ion binding;cation binding;ion binding;metal ion binding	extracellular membrane-bounded organelle;extracellular organelle;extracellular region part;extracellular vesicular exosome;membrane-bounded organelle;membrane-bounded vesicle;organelle;vesicle	Q9NZT1	78068000	0.166152	1.05698	Q9NZT1	Calmodulin-like protein 5	CALML5	22.0526	23.9455	21.9839	23.1147	22.515	22.3536	23.0491	22.0572	19.5323	21.7375	19.7286	22.4133	19.6967	20.9099	23.3801	4	4	4	15.8	15.8	15.8	15.892	0	35.425	20
RuvB-like 1	RUVBL1		0.225264	0.366827	ATP-dependent chromatin remodeling;biological regulation;biosynthetic process;cell cycle phase;cell cycle process;cell division;cellular biosynthetic process;cellular component assembly;cellular component assembly at cellular level;cellular component organization;cellular component organization at cellular level;cellular component organization or biogenesis;cellular component organization or biog…	adenyl nucleotide binding;adenyl ribonucleotide binding;ATP binding;binding;catalytic activity;DNA helicase activity;helicase activity;hydrolase activity;hydrolase activity, acting on acid anhydrides;hydrolase activity, acting on acid anhydrides, in phosphorus-containing anhydrides;nucleoside-triphosphatase activity;nucleotide binding;purine nucleotide binding;purine ribonucleoside triphosphate b…	cell part;chromatin remodeling complex;chromosomal part;cytoplasm;cytoplasmic part;cytoskeletal part;DNA helicase complex;extracellular membrane-bounded organelle;extracellular organelle;extracellular region part;extracellular vesicular exosome;Golgi apparatus;H4/H2A histone acetyltransferase complex;histone acetyltransferase complex;histone methyltransferase complex;Ino80 complex;intracellular m…	Q9Y265	35188000	0.473657	0.188837	Q9Y265	RuvB-like 1	RUVBL1	21.9662	22.555	19.1289	20.1744	20.6846	19.9917	21.5975	21.7307	21.8786	19.4265	21.2244	22.1567	21.1076	19.983	21.8837	4	4	4	11	11	11	50.227	0	34.1	17
Serine/threonine-protein kinase 38-like	STK38L		1.59073	0.813407	biological regulation;cellular macromolecule metabolic process;cellular metabolic process;cellular process;cellular protein metabolic process;cellular response to stimulus;intracellular signal transduction;macromolecule metabolic process;macromolecule modification;metabolic process;phosphate-containing compound metabolic process;phosphorus metabolic process;phosphorylation;primary metabolic proce…	adenyl nucleotide binding;adenyl ribonucleotide binding;ATP binding;binding;catalytic activity;cation binding;ion binding;kinase activity;magnesium ion binding;metal ion binding;nucleotide binding;phosphotransferase activity, alcohol group as acceptor;protein kinase activity;protein serine/threonine kinase activity;purine nucleotide binding;purine ribonucleoside triphosphate binding;purine ribonu…	actin cytoskeleton;cell part;cytoplasm;cytoskeleton;intracellular non-membrane-bounded organelle;intracellular organelle;intracellular part;membrane;non-membrane-bounded organelle;organelle	Q9Y2H1	211270000	0.137094	1.16893	Q9Y2H1	Serine/threonine-protein kinase 38-like	STK38L	24.1266	24.7236	24.2359	23.7765	23.859	23.8955	23.1623	23.783	23.9298	24.2865	24.3176	24.3608	24.2743	20.0806	23.9591	15	9	9	29.1	20.3	20.3	54.002	0	136.26	44
Thyroid hormone receptor-associated protein 3	THRAP3		0.403266	0.964774	androgen receptor signaling pathway;biological regulation;biosynthetic process;catabolic process;cellular biosynthetic process;cellular catabolic process;cellular macromolecule catabolic process;cellular macromolecule metabolic process;cellular metabolic process;cellular nitrogen compound metabolic process;cellular process;cellular response to stimulus;intracellular receptor mediated signaling pa…	adenyl nucleotide binding;adenyl ribonucleotide binding;ATP binding;binding;core promoter binding;core promoter sequence-specific DNA binding;DNA binding;hormone receptor binding;ligand-dependent nuclear receptor transcription coactivator activity;nuclear hormone receptor binding;nucleic acid binding;nucleotide binding;phosphoprotein binding;protein binding;protein binding transcription factor ac…	cell part;extracellular membrane-bounded organelle;extracellular organelle;extracellular region part;extracellular vesicular exosome;intracellular membrane-bounded organelle;intracellular organelle;intracellular organelle part;intracellular part;macromolecular complex;mediator complex;membrane-bounded organelle;membrane-bounded vesicle;nuclear part;nucleoplasm;nucleoplasm part;nucleus;organelle;o…	Q9Y2W1	149730000	0.0825862	1.46456	Q9Y2W1	Thyroid hormone receptor-associated protein 3	THRAP3	23.8964	24.3588	23.5655	23.9457	22.8143	23.7261	22.8225	23.0754	20.7297	23.9078	22.9499	23.4338	23.799	23.2748	23.5371	13	13	13	15.9	15.9	15.9	108.66	0	111.41	27
Spindlin-1	SPIN1		0.420417	0.929047	biological regulation;biosynthetic process;cell cycle;cell surface receptor linked signaling pathway;cellular biosynthetic process;cellular component organization;cellular component organization at cellular level;cellular component organization or biogenesis;cellular component organization or biogenesis at cellular level;cellular macromolecule biosynthetic process;cellular macromolecule metabolic…	binding;histone binding;methylated histone residue binding;protein binding	cell part;cytoskeletal part;intracellular membrane-bounded organelle;intracellular non-membrane-bounded organelle;intracellular organelle;intracellular organelle part;intracellular part;membrane-bounded organelle;non-membrane-bounded organelle;nuclear part;nucleolus;nucleus;organelle;organelle part;spindle	Q9Y657	153110000	0.095322	1.39497	Q9Y657;Q5JUX0	Spindlin-1	SPIN1	24.3273	23.6883	24.237	23.7881	23.5393	23.4153	23.1151	23.0741	23.1307	23.7649	23.3899	23.6411	23.8753	23.2126	23.9034	5	5	5	22.1	22.1	22.1	29.6	0	72.47	35
Coatomer subunit gamma-1	COPG1		0.205344	0.411302	cellular component movement;cellular component organization;cellular component organization at cellular level;cellular component organization or biogenesis;cellular component organization or biogenesis at cellular level;cellular process;COPI coating of Golgi vesicle;cytoskeleton-dependent intracellular transport;establishment of Golgi localization;establishment of localization;establishment of lo…	structural molecule activity	cell part;COPI vesicle coat;cytoplasmic part;cytoplasmic vesicle part;cytosol;Golgi apparatus part;Golgi membrane;intracellular organelle part;intracellular part;macromolecular complex;membrane;membrane coat;membrane part;organelle membrane;organelle part;protein complex;vesicle coat	Q9Y678	10178000	0.439737	0.30474	Q9Y678	Coatomer subunit gamma-1	COPG1	21.5782	20.4219	20.8547	20.9525	19.5515	20.2447	20.7258	19.5839	20.5107	18.8931	19.6203	19.612	21.826	20.5892	19.8236	4	4	2	6.3	6.3	3	97.717	0	32.77	9

## Sheet: All peptides
Sequence	N-term cleavage window	C-term cleavage window	Amino acid before	First amino acid	Second amino acid	Second last amino acid	Last amino acid	Amino acid after	A Count	R Count	N Count	D Count	C Count	Q Count	E Count	G Count	H Count	I Count	L Count	K Count	M Count	F Count	P Count	S Count	T Count	W Count	Y Count	V Count	U Count	O Count	Length	Missed cleavages	Mass	Proteins	Leading razor protein	Start position	End position	Gene names	Protein names	Unique (Groups)	Unique (Proteins)	Charges	PEP	Score	Identification type A_mut_1	Identification type A_mut_2	Identification type A_mut_3	Identification type A-1	Identification type A-2
AAAAELSLLEK	______________________________	______________________________	M	A	A	E	K	S	4	0	0	0	0	0	2	0	0	0	3	1	0	0	0	1	0	0	0	0	0	0	11	0	1114.62	O43324	O43324	2	12	EEF1E1	Eukaryotic translation elongation factor 1 epsilon-1	yes	yes	2	7.4226e-05	98.048		By MS/MS
AAAASVTGR	______________________________	______________________________	M	A	A	G	R	V	4	1	0	0	0	0	0	1	0	0	0	0	0	0	0	1	1	0	0	1	0	0	9	0	802.43	Q8NHH1	Q8NHH1	2	10	TTLL11	Tubulin polyglutamylase TTLL11	yes	yes	2	0.0040927	74.415	By MS/MS
AAAEVAGQFVIK	KELIERIPELNKVARAAAEVAGQFVIKLTH	VARAAAEVAGQFVIKLTHDVELNLDYERYN	R	A	A	I	K	L	4	0	0	0	0	1	1	1	0	1	0	1	0	1	0	0	0	0	0	2	0	0	12	0	1202.67	P02786	P02786	589	600	TFRC	Transferrin receptor protein 1;Transferrin receptor protein 1, serum form	yes	yes	2	0.00017236	66.435	By MS/MS	By MS/MS
AAAGGGGGGAAAAGR	______________________________	AAAGGGGGGAAAAGRAYSFKVVLLGEGCVG	M	A	A	G	R	A	7	1	0	0	0	0	0	7	0	0	0	0	0	0	0	0	0	0	0	0	0	0	15	0	1070.52	Q9UL25	Q9UL25	2	16	RAB21	Ras-related protein Rab-21	yes	yes	2	6.9936e-13	111.06	By matching	By MS/MS		By matching
AAANEQLTR	DQKRLKQAKELDRERAAANEQLTRAILRER	ELDRERAAANEQLTRAILRERICSEEERAK	R	A	A	T	R	A	3	1	1	0	0	1	1	0	0	0	1	0	0	0	0	0	1	0	0	0	0	0	9	0	972.499	Q9NX63	Q9NX63	96	104	CHCHD3	MICOS complex subunit MIC19	yes	yes	2	3.4034e-05	145.65	By MS/MS	By MS/MS	By MS/MS	By MS/MS	By MS/MS
AAAQEADGAR	______________________________	______________________________	M	A	A	A	R	S	5	1	0	1	0	1	1	1	0	0	0	0	0	0	0	0	0	0	0	0	0	0	10	0	958.447	O96005	O96005	2	11	CLPTM1	Cleft lip and palate transmembrane protein 1	yes	yes	2	0.00032866	92.439		By MS/MS	By MS/MS
AAATPESQEPQAK	EIGACSDEGTAQEGKAAATPESQEPQAKGA	GKAAATPESQEPQAKGAEASAASEEEAGPQ	K	A	A	A	K	G	4	0	0	0	0	2	2	0	0	0	0	1	0	0	2	1	1	0	0	0	0	0	13	0	1326.64	P49006	P49006	145	157	MARCKSL1	MARCKS-related protein	yes	yes	2	3.588e-11	115.78	By MS/MS	By MS/MS	By MS/MS	By MS/MS	By MS/MS
AAEDDEDDDVDTKK	DGDEDEEAESATGKRAAEDDEDDDVDTKKQ	RAAEDDEDDDVDTKKQKTDEDD________	R	A	A	K	K	Q	2	0	0	6	0	0	2	0	0	0	0	2	0	0	0	0	1	0	0	1	0	0	14	1	1564.64	P06454	P06454	91	104	PTMA	Prothymosin alpha;Prothymosin alpha, N-terminally processed;Thymosin alpha-1	yes	yes	3	2.2489e-08	105.14		By MS/MS	By matching
AAEDDEDDDVDTKKQK	DGDEDEEAESATGKRAAEDDEDDDVDTKKQ	AEDDEDDDVDTKKQKTDEDD__________	R	A	A	Q	K	T	2	0	0	6	0	1	2	0	0	0	0	3	0	0	0	0	1	0	0	1	0	0	16	2	1820.79	P06454	P06454	91	106	PTMA	Prothymosin alpha;Prothymosin alpha, N-terminally processed;Thymosin alpha-1	yes	yes	4	8.1294e-05	78.069		By MS/MS
AAEEEDEADPKR	EEEEEEDDEGPALKRAAEEEDEADPKRQKT	LKRAAEEEDEADPKRQKTENGASA______	R	A	A	K	R	Q	3	1	0	2	0	0	4	0	0	0	0	1	0	0	1	0	0	0	0	0	0	0	12	1	1358.6	P20962	P20962	82	93	PTMS	Parathymosin	yes	yes	3	0.0030335	60.49		By MS/MS
AAEEPSKVEEK	AAVAPEKPPASDETKAAEEPSKVEEKKAEE	DETKAAEEPSKVEEKKAEEAGASAAACEAP	K	A	A	E	K	K	2	0	0	0	0	0	4	0	0	0	0	2	0	0	1	1	0	0	0	1	0	0	11	1	1215.6	P29966	P29966	257	267	MARCKS	Myristoylated alanine-rich C-kinase substrate	yes	yes	3	0.00041011	91.937			By MS/MS	By MS/MS	By MS/MS
AAELIANSLATAGDGLIELR	QQKKAAIISAEGDSKAAELIANSLATAGDG	ANSLATAGDGLIELRKLEAAEDIAYQLSRS	K	A	A	L	R	K	5	1	1	1	0	0	2	2	0	2	4	0	0	0	0	1	1	0	0	0	0	0	20	0	1997.08	P35232	P35232	220	239	PHB	Prohibitin	yes	yes	2	1.1482e-72	182.57	By matching	By matching	By matching
AAFGLSEAGFNTACVTK	EFDAVVVGAGGAGLRAAFGLSEAGFNTACV	FGLSEAGFNTACVTKLFPTRSHTVAAQGGI	R	A	A	T	K	L	4	0	1	0	1	0	1	2	0	0	1	1	0	2	0	1	2	0	0	1	0	0	17	0	1742.83	P31040	P31040	76	92	SDHA	Succinate dehydrogenase [ubiquinone] flavoprotein subunit, mitochondrial	yes	yes	2	1.9639e-06	91.914		By MS/MS
AAGTAAALAFLSQESR	______________________________	AGTAAALAFLSQESRTRAGGVGGLRVPAPV	M	A	A	S	R	T	6	1	0	0	0	1	1	1	0	0	2	0	0	1	0	2	1	0	0	0	0	0	16	0	1562.81	O75607	O75607	2	17	NPM3	Nucleoplasmin-3	yes	yes	2	1.5019e-45	142.91	By MS/MS	By MS/MS
AAGVEAAAEVAATEIK	______________________________	AGVEAAAEVAATEIKMEEESGAPGVPSGNG	M	A	A	I	K	M	7	0	0	0	0	0	3	1	0	1	0	1	0	0	0	0	1	0	0	2	0	0	16	0	1499.78	P52272	P52272	2	17	HNRNPM	Heterogeneous nuclear ribonucleoprotein M	yes	yes	2	3.886e-18	105.17
AAGVNVEPFWPGLFAK	DEVTVTEDKINALIKAAGVNVEPFWPGLFA	AGVNVEPFWPGLFAKALANVNIGSLICNVG	K	A	A	A	K	A	3	0	1	0	0	0	1	2	0	0	1	1	0	2	2	0	0	1	0	2	0	0	16	0	1701.89	P05386	P05386	34	49	RPLP1	60S acidic ribosomal protein P1	yes	yes	2	5.5757e-42	159.94	By MS/MS	By MS/MS	By MS/MS	By MS/MS	By MS/MS
AAHGVLLQALDEMR	WPAGGAAATGGLGYRAAHGVLLQALDEMRA	RAAHGVLLQALDEMRADAEAVLAPPEPAQ_	R	A	A	M	R	A	3	1	0	1	0	1	1	1	1	0	3	0	1	0	0	0	0	0	0	1	0	0	14	0	1522.79	Q8WZA9	Q8WZA9	596	609	IRGQ	Immunity-related GTPase family Q protein	yes	yes	2;3	2.8654e-13	119.16	By MS/MS		By MS/MS	By MS/MS
AAIISAEGDSK	ERARFVVEKAEQQKKAAIISAEGDSKAAEL	QQKKAAIISAEGDSKAAELIANSLATAGDG	K	A	A	S	K	A	3	0	0	1	0	0	1	1	0	2	0	1	0	0	0	2	0	0	0	0	0	0	11	0	1060.54	P35232	P35232	209	219	PHB	Prohibitin	yes	yes	2	0.00075771	93.111	By matching	By matching	By MS/MS		By matching
AAILPTSIFLTNK	PSNHVIDRWLGEPIKAAILPTSIFLTNKKG	IKAAILPTSIFLTNKKGFPVLSKMHQRLIF	K	A	A	N	K	K	2	0	1	0	0	0	0	0	0	2	2	1	0	1	1	1	2	0	0	0	0	0	13	0	1387.81	O14744	O14744	228	240	PRMT5	Protein arginine N-methyltransferase 5;Protein arginine N-methyltransferase 5, N-terminally processed	yes	yes	2	1.5548e-20	155.06	By MS/MS	By MS/MS	By MS/MS	By MS/MS	By MS/MS
AAILPTSIFLTNKK	PSNHVIDRWLGEPIKAAILPTSIFLTNKKG	KAAILPTSIFLTNKKGFPVLSKMHQRLIFR	K	A	A	K	K	G	2	0	1	0	0	0	0	0	0	2	2	2	0	1	1	1	2	0	0	0	0	0	14	1	1515.9	O14744	O14744	228	241	PRMT5	Protein arginine N-methyltransferase 5;Protein arginine N-methyltransferase 5, N-terminally processed	yes	yes	3	7.1052e-17	136.01	By MS/MS	By MS/MS	By MS/MS	By MS/MS	By MS/MS
AALEALDELDLFGVK	QGISELNASSVGMAKAALEALDELDLFGVK	AALEALDELDLFGVKGGPQSVIHVLADEVQ	K	A	A	V	K	G	3	0	0	2	0	0	2	1	0	0	4	1	0	1	0	0	0	0	0	1	0	0	15	0	1602.85	P46020	P46020	207	221	PHKA1	Phosphorylase b kinase regulatory subunit alpha, skeletal muscle isoform	yes	yes	2	3.1662e-12	110.86
AALQELLSK	AVVSERLKIRGSLARAALQELLSKGLIKLV	RGSLARAALQELLSKGLIKLVSKHRAQVIY	R	A	A	S	K	G	2	0	0	0	0	1	1	0	0	0	3	1	0	0	0	1	0	0	0	0	0	0	9	0	971.565	P62851	P62851	86	94	RPS25	40S ribosomal protein S25	yes	yes	2	0.051532	60.91		By matching
AALQSQAEALR	NCGSSDGCEELERLRAALQSQAEALRRLLP	ERLRAALQSQAEALRRLLPPAQDGFEVLGA	R	A	A	L	R	R	4	1	0	0	0	2	1	0	0	0	2	0	0	0	0	1	0	0	0	0	0	0	11	0	1156.62	Q8WZA9	Q8WZA9	166	176	IRGQ	Immunity-related GTPase family Q protein	yes	yes	2	0.00052612	95.775	By MS/MS		By matching
AALQSQAEALRR	NCGSSDGCEELERLRAALQSQAEALRRLLP	RLRAALQSQAEALRRLLPPAQDGFEVLGAA	R	A	A	R	R	L	4	2	0	0	0	2	1	0	0	0	2	0	0	0	0	1	0	0	0	0	0	0	12	1	1312.72	Q8WZA9	Q8WZA9	166	177	IRGQ	Immunity-related GTPase family Q protein	yes	yes	3	1.8904e-12	145.91			By MS/MS
AALVLEDGSVLR	______________________________	______________________________	M	A	A	L	R	G	2	1	0	1	0	0	1	1	0	0	3	0	0	0	0	1	0	0	0	2	0	0	12	0	1241.7	P27708	P27708	2	13	CAD	CAD protein;Glutamine-dependent carbamoyl-phosphate synthase;Aspartate carbamoyltransferase;Dihydroorotase	yes	yes	2	1.1174e-07	109.66	By MS/MS	By matching	By matching	By MS/MS
AAMAVGGAGGSR	______________________________	______________________________	M	A	A	S	R	V	4	1	0	0	0	0	0	4	0	0	0	0	1	0	0	1	0	0	0	1	0	0	12	0	1003.49	O14744	O14744	2	13	PRMT5	Protein arginine N-methyltransferase 5;Protein arginine N-methyltransferase 5, N-terminally processed	yes	yes	2	1.2435e-23	166.34	By MS/MS	By MS/MS	By MS/MS	By MS/MS	By MS/MS
AAPGAEFAPNKR	EGIGAIGGTPPAFNRAAPGAEFAPNKRRRY	FNRAAPGAEFAPNKRRRY____________	R	A	A	K	R	R	4	1	1	0	0	0	1	1	0	0	0	1	0	1	2	0	0	0	0	0	0	0	12	1	1227.64	Q15233	Q15233	457	468	NONO	Non-POU domain-containing octamer-binding protein	yes	yes	2;3	1.3894e-07	111.46	By MS/MS	By MS/MS	By MS/MS	By matching	By MS/MS
AAPVDLELKK	______________________________	______________________________	M	A	A	K	K	A	2	0	0	1	0	0	1	0	0	0	2	2	0	0	1	0	0	0	0	1	0	0	10	1	1082.63	O60925	O60925	2	11	PFDN1	Prefoldin subunit 1	yes	yes	2	0.0035695	46.158		By MS/MS	By MS/MS
AAQDRDQIYR	SRSYRGGGGGGGGWRAAQDRDQIYRRRSPS	GGGWRAAQDRDQIYRRRSPSPYYSRGGYRS	R	A	A	Y	R	R	2	2	0	2	0	2	0	0	0	1	0	0	0	0	0	0	0	0	1	0	0	0	10	1	1234.61	P62995	P62995	252	261	TRA2B	Transformer-2 protein homolog beta	yes	yes	3	0.0013201	85.355		By MS/MS
AAQEEYVKR	ASALKAWGGKKENLKAAQEEYVKRALANSL	KKENLKAAQEEYVKRALANSLACQGKYTPS	K	A	A	K	R	A	2	1	0	0	0	1	2	0	0	0	0	1	0	0	0	0	0	0	1	1	0	0	9	1	1092.56	P04075	P04075	323	331	ALDOA	Fructose-bisphosphate aldolase A	yes	yes	3	0.010078	56.729		By MS/MS
AAREPNIDR	RAPPIDRSILPTAPRAAREPNIDRSRLPKS	LPTAPRAAREPNIDRSRLPKSPPYTAFLGN	R	A	A	D	R	S	2	2	1	1	0	0	1	0	0	1	0	0	0	0	1	0	0	0	0	0	0	0	9	1	1040.54	P23588	P23588	79	87	EIF4B	Eukaryotic translation initiation factor 4B	yes	yes	3	7.8526e-13	167.67	By MS/MS	By MS/MS	By matching	By MS/MS	By MS/MS
AASAGQEPLHNEELAGAGR	LLVGFILFLTRSRGRAASAGQEPLHNEELA	GQEPLHNEELAGAGRVAQPGPLEPEEPRAG	R	A	A	G	R	V	5	1	1	0	0	1	3	3	1	0	2	0	0	0	1	1	0	0	0	0	0	0	19	0	1876.9	Q96HY6	Q96HY6	28	46	DDRGK1	DDRGK domain-containing protein 1	yes	yes	3	2.6671e-11	98.796		By MS/MS
AASIFGGAKPVDTAAR	PKEDDSSASTSQSTRAASIFGGAKPVDTAA	ASIFGGAKPVDTAAREREVEERLQKEQEKL	R	A	A	A	R	E	5	1	0	1	0	0	0	2	0	1	0	1	0	1	1	1	1	0	0	1	0	0	16	1	1530.82	P23588	P23588	357	372	EIF4B	Eukaryotic translation initiation factor 4B	yes	yes	3	1.4079e-16	119.56	By MS/MS	By MS/MS	By matching	By MS/MS	By matching
AASLELSEVKK	AAAKVEAGHNRRHFKAASLELSEVKKELQA	RHFKAASLELSEVKKELQAKEHLVQKLQAE	K	A	A	K	K	E	2	0	0	0	0	0	2	0	0	0	2	2	0	0	0	2	0	0	0	1	0	0	11	1	1173.66	Q08378	Q08378	1211	1221	GOLGA3	Golgin subfamily A member 3	yes	yes	2	0.016697	85.731	By matching	By matching	By MS/MS
AATASAGAGGIDGKPR	______________________________	ATASAGAGGIDGKPRTSPKSVKFLFGGLAG	M	A	A	P	R	T	5	1	0	1	0	0	0	4	0	1	0	1	0	0	1	1	1	0	0	0	0	0	16	1	1398.72	Q02978	Q02978	2	17	SLC25A11	Mitochondrial 2-oxoglutarate/malate carrier protein	yes	yes	2	5.5055e-92	203.11	By matching	By MS/MS
AATGEEVPR	FSISNGLATTQINNKAATGEEVPRTIIVTT	TQINNKAATGEEVPRTIIVTTRSQYGLPED	K	A	A	P	R	T	2	1	0	0	0	0	2	1	0	0	0	0	0	0	1	0	1	0	0	1	0	0	9	0	928.461	O15294	O15294	817	825	OGT	UDP-N-acetylglucosamine--peptide N-acetylglucosaminyltransferase 110 kDa subunit	yes	yes	2	0.001032	130.27	By MS/MS	By matching	By MS/MS		By MS/MS
AAVENLPTFLVELSR	PDRLELEAAQKFLERAAVENLPTFLVELSR	AAVENLPTFLVELSRVLANPGNSQVARVAA	R	A	A	S	R	V	2	1	1	0	0	0	2	0	0	0	3	0	0	1	1	1	1	0	0	2	0	0	15	0	1657.9	Q14974	Q14974	28	42	KPNB1	Importin subunit beta-1	yes	yes	2	0.00075656	78.903		By matching
AAVPDAVGK	NLCFVGLISMIDPPRAAVPDAVGKCRSAGI	MIDPPRAAVPDAVGKCRSAGIKVIMVTGDH	R	A	A	G	K	C	3	0	0	1	0	0	0	1	0	0	0	1	0	0	1	0	0	0	0	2	0	0	9	0	826.455	P05023;P13637;P50993	P05023	597	605	ATP1A1;ATP1A3;ATP1A2	Sodium/potassium-transporting ATPase subunit alpha-1;Sodium/potassium-transporting ATPase subunit alpha-3;Sodium/potassium-transporting ATPase subunit alpha-2	no	no	2	0.029539	68.383			By matching
AAVQAAEVKVDGSEPK	______________________________	AVQAAEVKVDGSEPKLSKNELKRRLKAEKK	M	A	A	P	K	L	4	0	0	1	0	1	2	1	0	0	0	2	0	0	1	1	0	0	0	3	0	0	16	1	1597.83	Q15046	Q15046	2	17	KARS	Lysine--tRNA ligase	yes	yes	2	2.2465e-51	172.99		By MS/MS
AAWEVDSGRR	EMAMKVELARMSYQRAAWEVDSGRRNTYYA	MSYQRAAWEVDSGRRNTYYASIAKAFAGDI	R	A	A	R	R	N	2	2	0	1	0	0	1	1	0	0	0	0	0	0	0	1	0	1	0	1	0	0	10	1	1145.56	P11310	P11310	340	349	ACADM	Medium-chain specific acyl-CoA dehydrogenase, mitochondrial	yes	yes	3	0.00015022	96.143		By MS/MS
AAYFGIYDTAK	YQGFNVSVQGIIIYRAAYFGIYDTAKGMLP	IIYRAAYFGIYDTAKGMLPDPKNTHIVISW	R	A	A	A	K	G	3	0	0	1	0	0	0	1	0	1	0	1	0	1	0	0	1	0	2	0	0	0	11	0	1218.59	P05141	P05141	189	199	SLC25A5	ADP/ATP translocase 2;ADP/ATP translocase 2, N-terminally processed	yes	yes	2	0.00017489	99.815	By MS/MS	By MS/MS	By MS/MS	By MS/MS	By MS/MS
AAYFGVYDTAK	YQGFSVSVQGIIIYRAAYFGVYDTAKGMLP	IIYRAAYFGVYDTAKGMLPDPKNTHIVVSW	R	A	A	A	K	G	3	0	0	1	0	0	0	1	0	0	0	1	0	1	0	0	1	0	2	1	0	0	11	0	1204.58	P12236;P12235	P12236	189	199	SLC25A6;SLC25A4	ADP/ATP translocase 3;ADP/ATP translocase 3, N-terminally processed;ADP/ATP translocase 1	yes	no	2	0.019085	63.283	By matching	By MS/MS	By matching	By matching	By matching
ACARPLISVYSEKGESSGK	______________________________	PLISVYSEKGESSGKNVTLPAVFKAPIRPD	M	A	C	G	K	N	2	1	0	0	1	0	2	2	0	1	1	2	0	0	1	4	0	0	1	1	0	0	19	2	2038.02	P36578	P36578	2	20	RPL4	60S ribosomal protein L4	yes	yes	3	5.5493e-11	93.812		By MS/MS
ACPLDQAIGLLVAIFHK	______________________________	PLDQAIGLLVAIFHKYSGREGDKHTLSKKE	M	A	C	H	K	Y	3	0	0	1	1	1	0	1	1	2	3	1	0	1	1	0	0	0	0	1	0	0	17	0	1865.02	P06703	P06703	2	18	S100A6	Protein S100-A6	yes	yes	2;3	1.0397e-79	199.27	By MS/MS	By MS/MS		By MS/MS
ADAEAVLAPPEPAQ	RAAHGVLLQALDEMRADAEAVLAPPEPAQ_	RADAEAVLAPPEPAQ_______________	R	A	D	A	Q	-	5	0	0	1	0	1	2	0	0	0	1	0	0	0	3	0	0	0	0	1	0	0	14	0	1377.68	Q8WZA9	Q8WZA9	610	623	IRGQ	Immunity-related GTPase family Q protein	yes	yes	2	1.7754e-12	117.7	By matching	By matching	By matching
ADDLGKGGNEESTK	GDHCIIGRTLVVHEKADDLGKGGNEESTKT	KADDLGKGGNEESTKTGNAGSRLACGVIGI	K	A	D	T	K	T	1	0	1	2	0	0	2	3	0	0	1	2	0	0	0	1	1	0	0	0	0	0	14	1	1419.65	P00441	P00441	124	137	SOD1	Superoxide dismutase [Cu-Zn]	yes	yes	3	0.00049452	81.632		By MS/MS	By matching	By matching
ADEELEALRR	______________________________	______________________________	M	A	D	R	R	Q	2	2	0	1	0	0	3	0	0	0	2	0	0	0	0	0	0	0	0	0	0	0	10	1	1200.61	O14737	O14737	2	11	PDCD5	Programmed cell death protein 5	yes	yes	2	7.6624e-06	117.89		By MS/MS
ADEGISFR	SDPKRTIAQDYGVLKADEGISFRGLFIIDD	QDYGVLKADEGISFRGLFIIDDKGILRQIT	K	A	D	F	R	G	1	1	0	1	0	0	1	1	0	1	0	0	0	1	0	1	0	0	0	0	0	0	8	0	893.424	Q06830	Q06830	121	128	PRDX1	Peroxiredoxin-1	yes	yes	2	0.024931	89.296	By matching	By matching	By MS/MS	By MS/MS	By matching
ADEKPKEGVK	______________________________	______________________________	M	A	D	V	K	T	1	0	0	1	0	0	2	1	0	0	0	3	0	0	1	0	0	0	0	1	0	0	10	2	1099.59	P61956	P61956	2	11	SUMO2	Small ubiquitin-related modifier 2	yes	yes	3	0.01399	47.894		By MS/MS
ADGQVAELLLR	______________________________	______________________________	M	A	D	L	R	R	2	1	0	1	0	1	1	1	0	0	3	0	0	0	0	0	0	0	0	1	0	0	11	0	1183.66	Q9Y285	Q9Y285	2	12	FARSA	Phenylalanine--tRNA ligase alpha subunit	yes	yes	2	1.5684e-18	161.17	By MS/MS	By MS/MS	By MS/MS	By MS/MS
ADIQTER	______________________________	______________________________	M	A	D	E	R	A	1	1	0	1	0	1	1	0	0	1	0	0	0	0	0	0	1	0	0	0	0	0	7	0	831.409	P62280	P62280	2	8	RPS11	40S ribosomal protein S11	yes	yes	2	0.01112	60.799		By MS/MS
ADKLAEEHSS	QAFYMVGPIEEAVAKADKLAEEHSS_____	EAVAKADKLAEEHSS_______________	K	A	D	S	S	-	2	0	0	1	0	0	2	0	1	0	1	1	0	0	0	2	0	0	0	0	0	0	10	1	1085.5	P06576	P06576	520	529	ATP5B	ATP synthase subunit beta, mitochondrial	yes	yes	2	0.051188	75.213	By MS/MS
ADKPDMGEIASFDKAK	______________________________	DKPDMGEIASFDKAKLKKTETQEKNTLPTK	M	A	D	A	K	L	3	0	0	3	0	0	1	1	0	1	0	3	1	1	1	1	0	0	0	0	0	0	16	2	1721.83	P63313	P63313	2	17	TMSB10	Thymosin beta-10	yes	yes	3	0.0013884	63.145		By MS/MS
ADLINNLGTIAK	ERTLTLVDTGIGMTKADLINNLGTIAKSGT	MTKADLINNLGTIAKSGTKAFMEALQAGAD	K	A	D	A	K	S	2	0	2	1	0	0	0	1	0	2	2	1	0	0	0	0	1	0	0	0	0	0	12	0	1241.7	P08238;Q58FF8;Q14568;P07900	P08238	96	107	HSP90AB1;HSP90AB2P;HSP90AA2P;HSP90AA1	Heat shock protein HSP 90-beta;Putative heat shock protein HSP 90-beta 2;Heat shock protein HSP 90-alpha A2;Heat shock protein HSP 90-alpha	no	no	2	2.6177e-09	134.68	By MS/MS	By MS/MS	By MS/MS	By MS/MS	By MS/MS
ADLTEYLSTHYK	QAVEGPSENVRKLSRADLTEYLSTHYKAPR	LSRADLTEYLSTHYKAPRMVLAAAGGVEHQ	R	A	D	Y	K	A	1	0	0	1	0	0	1	0	1	0	2	1	0	0	0	1	2	0	2	0	0	0	12	0	1439.69	P31930	P31930	214	225	UQCRC1	Cytochrome b-c1 complex subunit 1, mitochondrial	yes	yes	3	0.050983	33.204	By matching		By MS/MS	By matching
ADMLEKEQVGHIR	KKDTGHVYAMKILRKADMLEKEQVGHIRAE	RKADMLEKEQVGHIRAERDILVEADSLWVV	K	A	D	I	R	A	1	1	0	1	0	1	2	1	1	1	1	1	1	0	0	0	0	0	0	1	0	0	13	1	1524.77	Q15208	Q15208	123	135	STK38	Serine/threonine-protein kinase 38	yes	yes	4	0.0065206	50.563		By MS/MS	By matching
ADTLTDEINFLR	DVDAAYMNKVELQAKADTLTDEINFLRALY	QAKADTLTDEINFLRALYDAELSQMQTHIS	K	A	D	L	R	A	1	1	1	2	0	0	1	0	0	1	2	0	0	1	0	0	2	0	0	0	0	0	12	0	1406.7	CON__P02538;P02538;CON__P04259;CON__P48668;P48668;P04259	CON__P04259	288	299	KRT6A;KRT6C;KRT6B	Keratin, type II cytoskeletal 6A;Keratin, type II cytoskeletal 6C;Keratin, type II cytoskeletal 6B	no	no	2	1.8804e-220	276.03		By matching	By matching	By MS/MS	By MS/MS
ADTQTYQPYNK	DFIDDLADLSCLVYRADTQTYQPYNKDWIK	LVYRADTQTYQPYNKDWIKEKIYVLLRRQA	R	A	D	N	K	D	1	0	1	1	0	2	0	0	0	0	0	1	0	0	1	0	2	0	2	0	0	0	11	0	1327.6	P84090	P84090	74	84	ERH	Enhancer of rudimentary homolog	yes	yes	2	0.00020735	99.442		By matching	By MS/MS	By MS/MS	By matching
ADTQTYQPYNKDWIK	DFIDDLADLSCLVYRADTQTYQPYNKDWIK	ADTQTYQPYNKDWIKEKIYVLLRRQAQQAG	R	A	D	I	K	E	1	0	1	2	0	2	0	0	0	1	0	2	0	0	1	0	2	1	2	0	0	0	15	1	1869.89	P84090	P84090	74	88	ERH	Enhancer of rudimentary homolog	yes	yes	3	0.00053803	74.257	By MS/MS	By matching	By MS/MS	By MS/MS	By matching
ADTQTYQPYNKDWIKEK	DFIDDLADLSCLVYRADTQTYQPYNKDWIK	TQTYQPYNKDWIKEKIYVLLRRQAQQAGK_	R	A	D	E	K	I	1	0	1	2	0	2	1	0	0	1	0	3	0	0	1	0	2	1	2	0	0	0	17	2	2127.03	P84090	P84090	74	90	ERH	Enhancer of rudimentary homolog	yes	yes	3;4	0.0023934	66.893		By MS/MS
AEACFVNCVER	WEKCMDKPGPKLDSRAEACFVNCVERFIDT	LDSRAEACFVNCVERFIDTSQFILNRLEQT	R	A	E	E	R	F	2	1	1	0	2	0	2	0	0	0	0	0	0	1	0	0	0	0	0	2	0	0	11	0	1353.58	O60220	O60220	59	69	TIMM8A	Mitochondrial import inner membrane translocase subunit Tim8 A	yes	yes	2	0.0064019	55.567
AEAESLYQSK	AEVKAQYEDIAQKSKAEAESLYQSKYEELQ	AQKSKAEAESLYQSKYEELQITAGRHGDSV	K	A	E	S	K	Y	2	0	0	0	0	1	2	0	0	0	1	1	0	0	0	2	0	0	1	0	0	0	10	0	1124.54	P04264;CON__P04264	P04264	367	376	KRT1	Keratin, type II cytoskeletal 1	yes	no	2	8.4586e-08	138.98		By MS/MS		By MS/MS	By matching
AEAESLYQSKYEELQITAGR	AEVKAQYEDIAQKSKAEAESLYQSKYEELQ	LYQSKYEELQITAGRHGDSVRNSKIEISEL	K	A	E	G	R	H	3	1	0	0	0	2	4	1	0	1	2	1	0	0	0	2	1	0	2	0	0	0	20	1	2285.12	P04264;CON__P04264	P04264	367	386	KRT1	Keratin, type II cytoskeletal 1	yes	no	3	1.6774e-15	109.09				By matching
AEAESWYQTK	AEVKAQYEEIAQRSRAEAESWYQTKYEELQ	AQRSRAEAESWYQTKYEELQVTAGRHGDDL	R	A	E	T	K	Y	2	0	0	0	0	1	2	0	0	0	0	1	0	0	0	1	1	1	1	0	0	0	10	0	1211.55	CON__P02538;P02538;CON__Q8VED5;CON__P04259;CON__P48668;P48668;P04259	CON__P04259	350	359	KRT6A;KRT6C;KRT6B	Keratin, type II cytoskeletal 6A;Keratin, type II cytoskeletal 6C;Keratin, type II cytoskeletal 6B	no	no	2	0.00096852	96.331				By MS/MS
AEAESWYQTKYEELQVTAGR	AEVKAQYEEIAQRSRAEAESWYQTKYEELQ	WYQTKYEELQVTAGRHGDDLRNTKQEIAEI	R	A	E	G	R	H	3	1	0	0	0	2	4	1	0	0	1	1	0	0	0	1	2	1	2	1	0	0	20	1	2358.11	CON__P02538;P02538;CON__P04259;CON__P48668;P48668	CON__P04259	350	369	KRT6A;KRT6C	Keratin, type II cytoskeletal 6A;Keratin, type II cytoskeletal 6C	no	no	3	0.019819	56.149
AEDGATPSPSNETPK	EGEAASAASSTSSPKAEDGATPSPSNETPK	AEDGATPSPSNETPKKKKKRFSFKKSFKLS	K	A	E	P	K	K	2	0	1	1	0	0	2	1	0	0	0	1	0	0	3	2	2	0	0	0	0	0	15	0	1499.67	P29966	P29966	138	152	MARCKS	Myristoylated alanine-rich C-kinase substrate	yes	yes	2	7.0866e-08	104.79	By matching	By matching	By MS/MS	By MS/MS	By MS/MS
AEEGIAAGGVMDVNTALQEVLK	______________________________	GGVMDVNTALQEVLKTALIHDGLARGIREA	M	A	E	L	K	T	4	0	1	1	0	1	3	3	0	1	2	1	1	0	0	0	1	0	0	3	0	0	22	0	2214.12	P25398	P25398	2	23	RPS12	40S ribosomal protein S12	yes	yes	2	1.1954e-08	59.871
AEENALQQK	RLNDSILQATEQRRRAEENALQQKACGSEI	TEQRRRAEENALQQKACGSEIMQKKQHLEI	R	A	E	Q	K	A	2	0	1	0	0	2	2	0	0	0	1	1	0	0	0	0	0	0	0	0	0	0	9	0	1029.51	P15924	P15924	1270	1278	DSP	Desmoplakin	yes	yes	2	0.015888	77.674
AEFVEVTK	LKAWSVARLSQKFPKAEFVEVTKLVTDLTK	LSQKFPKAEFVEVTKLVTDLTKVHKECCHG	K	A	E	T	K	L	1	0	0	0	0	0	2	0	0	0	0	1	0	1	0	0	1	0	0	2	0	0	8	0	921.481	CON__P02769	CON__P02769	249	256			yes	yes	2	0.009225	107.9	By matching	By MS/MS	By matching	By matching
AEHQQDSEDLFKK	RETAARIQEELSALRAEHQQDSEDLFKKIV	LRAEHQQDSEDLFKKIVRASQESEARIQQL	R	A	E	K	K	I	1	0	0	2	0	2	2	0	1	0	1	2	0	1	0	1	0	0	0	0	0	0	13	1	1573.74	Q9UH99	Q9UH99	364	376	SUN2	SUN domain-containing protein 2	yes	yes	3	0.00021375	85.837	By MS/MS	By matching	By MS/MS		By MS/MS
AELDGTILK	GFIRLESRTLAEIAKAELDGTILKSRPLRI	LAEIAKAELDGTILKSRPLRIRFATHGAAL	K	A	E	L	K	S	1	0	0	1	0	0	1	1	0	1	2	1	0	0	0	0	1	0	0	0	0	0	9	0	958.534	Q8WXF1	Q8WXF1	135	143	PSPC1	Paraspeckle component 1	yes	yes	2	0.0051795	96.253	By MS/MS	By MS/MS	By MS/MS	By MS/MS	By MS/MS
AELIVQPELK	TIQELLQNCSDCLMRAELIVQPELKYGDGI	DCLMRAELIVQPELKYGDGIQLTRSRELDE	R	A	E	L	K	Y	1	0	0	0	0	1	2	0	0	1	2	1	0	0	1	0	0	0	0	1	0	0	10	0	1138.66	P15924	P15924	85	94	DSP	Desmoplakin	yes	yes	2	0.005357	76.827
AELQAQLAALSTK	LEALSLEASQALKEKAELQAQLAALSTKLQ	EKAELQAQLAALSTKLQAQVECSHSSQQRQ	K	A	E	T	K	L	4	0	0	0	0	2	1	0	0	0	3	1	0	0	0	1	1	0	0	0	0	0	13	0	1342.75	Q08378	Q08378	436	448	GOLGA3	Golgin subfamily A member 3	yes	yes	2	5.6684e-14	134.98	By MS/MS	By MS/MS	By MS/MS	By MS/MS	By MS/MS
AENQSTTLPGPGR	IPSYSRFYESGSSLRAENQSTTLPGPGRNM	LRAENQSTTLPGPGRNMPNSQMVNIRDMSD	R	A	E	G	R	N	1	1	1	0	0	1	1	2	0	0	1	0	0	0	2	1	2	0	0	0	0	0	13	0	1326.65	Q7Z353	Q7Z353	335	347	HDX	Highly divergent homeobox	yes	yes	2	2.3716e-12	119.53	By MS/MS	By MS/MS	By MS/MS		By matching
AENQVLAMR	KLKDELASTKQKLEKAENQVLAMRKQSEGL	KQKLEKAENQVLAMRKQSEGLTKEYDRLLE	K	A	E	M	R	K	2	1	1	0	0	1	1	0	0	0	1	0	1	0	0	0	0	0	0	1	0	0	9	0	1030.52	P51572	P51572	205	213	BCAP31	B-cell receptor-associated protein 31	yes	yes	2	0.0043342	100.45		By matching	By MS/MS	By MS/MS
AEQSDEAVKYYTLEEIQK	______________________________	SDEAVKYYTLEEIQKHNHSKSTWLILHHKV	M	A	E	Q	K	H	2	0	0	1	0	2	4	0	0	1	1	2	0	0	0	1	1	0	2	1	0	0	18	1	2143.03	P00167	P00167	2	19	CYB5A	Cytochrome b5	yes	yes	3	4.4877e-09	94.384		By matching	By MS/MS		By matching
AESPSPAPPPGLR	DSPKDREVAEGGLPRAESPSPAPPPGLRGT	PRAESPSPAPPPGLRGTLDLQVIRVRMEEP	R	A	E	L	R	G	2	1	0	0	0	0	1	1	0	0	1	0	0	0	5	2	0	0	0	0	0	0	13	0	1274.66	Q9BUA3	Q9BUA3	306	318	C11orf84	Uncharacterized protein C11orf84	yes	yes	2	0.00019757	94.804	By MS/MS	By MS/MS	By MS/MS	By MS/MS	By MS/MS
AETECQNTEYQQLLDIK	QAQISALEEQLQQIRAETECQNTEYQQLLD	TECQNTEYQQLLDIKIRLENEIQTYRSLLE	R	A	E	I	K	I	1	0	1	1	1	3	3	0	0	1	2	1	0	0	0	0	2	0	1	0	0	0	17	0	2081.96	P13645;CON__P13645	P13645	423	439	KRT10	Keratin, type I cytoskeletal 10	yes	no	2;3	5.7415e-287	282.62	By matching	By MS/MS	By MS/MS	By MS/MS	By MS/MS
AEVEETLKR	______________________________	______________________________	M	A	E	K	R	L	1	1	0	0	0	0	3	0	0	0	1	1	0	0	0	0	1	0	0	1	0	0	9	1	1073.57	Q9NP97;Q8TF09	Q9NP97	2	10	DYNLRB1;DYNLRB2	Dynein light chain roadblock-type 1;Dynein light chain roadblock-type 2	yes	no	2	0.0045936	70.919	By matching	By matching	By matching	By matching	By matching
AEVGEKTEER	FSDIPRRAPKKPLTRAEVGEKTEERRVERD	KPLTRAEVGEKTEERRVERDILKEMFPYEA	R	A	E	E	R	R	1	1	0	0	0	0	4	1	0	0	0	1	0	0	0	0	1	0	0	1	0	0	10	1	1146.55	P42167	P42167	329	338	TMPO	Lamina-associated polypeptide 2, isoforms beta/gamma;Thymopoietin;Thymopentin	yes	yes	2	0.039733	63.216	By MS/MS	By MS/MS
AFANLRK	______________________________	______________________________	M	A	F	R	K	V	2	1	1	0	0	0	0	0	0	0	1	1	0	1	0	0	0	0	0	0	0	0	7	1	818.476	O43175	O43175	2	8	PHGDH	D-3-phosphoglycerate dehydrogenase	yes	yes	2	0.015611	74.517	By MS/MS	By MS/MS		By MS/MS
AFAVGVQQVLLK	NVSKEYNEFAEVFLKAFAVGVQQVLLKVLY	FLKAFAVGVQQVLLKVLYQYKEKQYMAPRV	K	A	F	L	K	V	2	0	0	0	0	2	0	1	0	0	2	1	0	1	0	0	0	0	0	3	0	0	12	0	1271.76	O95373	O95373	295	306	IPO7	Importin-7	yes	yes	2	6.8229e-10	95.099	By MS/MS
AFHNEAQVNPER	VNAAQDSTDLVAKLRAFHNEAQVNPERKNL	KLRAFHNEAQVNPERKNLKWIGLDLSNGKP	R	A	F	E	R	K	2	1	2	0	0	1	2	0	1	0	0	0	0	1	1	0	0	0	0	1	0	0	12	0	1410.66	P17987	P17987	469	480	TCP1	T-complex protein 1 subunit alpha	yes	yes	3	0.012997	46.88		By MS/MS	By matching
AFHNEAQVNPERK	VNAAQDSTDLVAKLRAFHNEAQVNPERKNL	LRAFHNEAQVNPERKNLKWIGLDLSNGKPR	R	A	F	R	K	N	2	1	2	0	0	1	2	0	1	0	0	1	0	1	1	0	0	0	0	1	0	0	13	1	1538.76	P17987	P17987	469	481	TCP1	T-complex protein 1 subunit alpha	yes	yes	3	0.00025175	84.352	By matching	By MS/MS	By matching
AFITNIPFDVK	GNRFEPYANPTKRYRAFITNIPFDVKWQSL	KRYRAFITNIPFDVKWQSLKDLVKEKVGEV	R	A	F	V	K	W	1	0	1	1	0	0	0	0	0	2	0	1	0	2	1	0	1	0	0	1	0	0	11	0	1263.69	P52272	P52272	73	83	HNRNPM	Heterogeneous nuclear ribonucleoprotein M	yes	yes	2	1.5709e-05	101.65	By matching	By matching	By matching
AFLDSLPDVK	HIYDNRIVLNGIDLKAFLDSLPDVKIVKMK	GIDLKAFLDSLPDVKIVKMKCPDGGDNADS	K	A	F	V	K	I	1	0	0	2	0	0	0	0	0	0	2	1	0	1	1	1	0	0	0	1	0	0	10	0	1103.59	O15294	O15294	743	752	OGT	UDP-N-acetylglucosamine--peptide N-acetylglucosaminyltransferase 110 kDa subunit	yes	yes	2	4.7418e-05	116.37	By MS/MS	By MS/MS	By MS/MS	By MS/MS	By matching
AFLTLAEDILR	RFFETSAKANINIEKAFLTLAEDILRKTPV	NIEKAFLTLAEDILRKTPVKEPNSENVDIS	K	A	F	L	R	K	2	1	0	1	0	0	1	0	0	1	3	0	0	1	0	0	1	0	0	0	0	0	11	0	1260.71	P61026	P61026	162	172	RAB10	Ras-related protein Rab-10	yes	yes	2	9.4871e-06	103.55	By MS/MS	By matching		By MS/MS	By matching
AFSPTTVNTGR	SLFIATNICETIVWKAFSPTTVNTGRGMEF	IVWKAFSPTTVNTGRGMEFEGAIIALFHLL	K	A	F	G	R	G	1	1	1	0	0	0	0	1	0	0	0	0	0	1	1	1	3	0	0	1	0	0	11	0	1149.58	P61619	P61619	195	205	SEC61A1	Protein transport protein Sec61 subunit alpha isoform 1	yes	yes	2	0.0022663	82.749		By matching	By matching	By matching
AFVSGLLIGQCSSQK	ETVGQYLSNINLQGKAFVSGLLIGQCSSQK	AFVSGLLIGQCSSQKDYVILATRTPPKEEQ	K	A	F	Q	K	D	1	0	0	0	1	2	0	2	0	1	2	1	0	1	0	3	0	0	0	1	0	0	15	0	1593.82	Q5SWX8	Q5SWX8	24	38	ODR4	Protein odr-4 homolog	yes	yes	2	0.00062342	82.171			By matching	By matching
AFYPEEISSMVLTK	GDKPKVQVSYKGETKAFYPEEISSMVLTKM	KAFYPEEISSMVLTKMKEIAEAYLGYPVTN	K	A	F	T	K	M	1	0	0	0	0	0	2	0	0	1	1	1	1	1	1	2	1	0	1	1	0	0	14	0	1613.8	P0DMV9;P0DMV8	P0DMV9	113	126	HSPA1B;HSPA1A	Heat shock 70 kDa protein 1B;Heat shock 70 kDa protein 1A	no	no	2	0.00011134	93.345		By MS/MS	By matching
AGADEERAETAR	______________________________	IFKAGADEERAETARLTSFIGAIAIGDLVK	K	A	G	A	R	L	4	2	0	1	0	0	3	1	0	0	0	0	0	0	0	0	1	0	0	0	0	0	12	1	1274.59	P78371	P78371	14	25	CCT2	T-complex protein 1 subunit beta	yes	yes	3	0.00037619	90.731		By MS/MS
AGAEREFR	PLDFARTRLAADVGKAGAEREFRGLGDCLV	LAADVGKAGAEREFRGLGDCLVKIYKSDGI	K	A	G	F	R	G	2	2	0	0	0	0	2	1	0	0	0	0	0	1	0	0	0	0	0	0	0	0	8	1	934.462	P05141	P05141	148	155	SLC25A5	ADP/ATP translocase 2;ADP/ATP translocase 2, N-terminally processed	yes	yes	3	0.0083998	92.439	By matching	By MS/MS
AGAGSATLSMAYAGAR	TGRIQEAGTEVVKAKAGAGSATLSMAYAGA	GAGSATLSMAYAGARFVFSLVDAMNGKEGV	K	A	G	A	R	F	6	1	0	0	0	0	0	3	0	0	1	0	1	0	0	2	1	0	1	0	0	0	16	0	1453.7	P40926	P40926	242	257	MDH2	Malate dehydrogenase, mitochondrial	yes	yes	2	0.052267	44.299
AGELTEDEVER	AHVVLRKADIDLTKRAGELTEDEVERVITI	LTKRAGELTEDEVERVITIMQNPRQYKIPD	R	A	G	E	R	V	1	1	0	1	0	0	4	1	0	0	1	0	0	0	0	0	1	0	0	1	0	0	11	0	1246.57	P62269	P62269	56	66	RPS18	40S ribosomal protein S18	yes	yes	2	1.1436e-05	102.06
AGELTPEEEAQYK	______________________________	______________________________	M	A	G	Y	K	K	2	0	0	0	0	1	4	1	0	0	1	1	0	0	1	0	1	0	1	0	0	0	13	0	1463.68	Q9NZT1	Q9NZT1	2	14	CALML5	Calmodulin-like protein 5	yes	yes	2	3.6836e-05	96.015				By MS/MS
AGELTPEEEAQYKK	______________________________	MAGELTPEEEAQYKKAFSAVDTDGNGTINA	M	A	G	K	K	A	2	0	0	0	0	1	4	1	0	0	1	2	0	0	1	0	1	0	1	0	0	0	14	1	1591.77	Q9NZT1	Q9NZT1	2	15	CALML5	Calmodulin-like protein 5	yes	yes	2	1.0067e-12	113.47	By MS/MS	By MS/MS	By MS/MS	By MS/MS	By MS/MS
AGEVFIHK	ITEEEMRKLFEKYGKAGEVFIHKDKGFGFI	LFEKYGKAGEVFIHKDKGFGFIRLETRTLA	K	A	G	H	K	D	1	0	0	0	0	0	1	1	1	1	0	1	0	1	0	0	0	0	0	1	0	0	8	0	899.486	Q15233	Q15233	100	107	NONO	Non-POU domain-containing octamer-binding protein	yes	yes	2	0.0022649	120.62		By MS/MS
AGEVFIHKDK	ITEEEMRKLFEKYGKAGEVFIHKDKGFGFI	EKYGKAGEVFIHKDKGFGFIRLETRTLAEI	K	A	G	D	K	G	1	0	0	1	0	0	1	1	1	1	0	2	0	1	0	0	0	0	0	1	0	0	10	1	1142.61	Q15233	Q15233	100	109	NONO	Non-POU domain-containing octamer-binding protein	yes	yes	3	0.00096018	89.171	By matching	By MS/MS	By matching	By matching
AGEVQEPELR	AYDFYPGKIDVHWTRAGEVQEPELRGDVLH	VHWTRAGEVQEPELRGDVLHNGNGTYQSWV	R	A	G	L	R	G	1	1	0	0	0	1	3	1	0	0	1	0	0	0	1	0	0	0	0	1	0	0	10	0	1126.56	P25311	P25311	242	251	AZGP1	Zinc-alpha-2-glycoprotein	yes	yes	2	0.0045595	79.474				By matching
AGFAGDDAPR	EIAALVIDNGSGMCKAGFAGDDAPRAVFPS	SGMCKAGFAGDDAPRAVFPSIVGRPRHQGV	K	A	G	P	R	A	3	1	0	2	0	0	0	2	0	0	0	0	0	1	1	0	0	0	0	0	0	0	10	0	975.441	P63267;P68133;P68032;P62736;P63261;P60709;Q6S8J3;A5A3E0;P0CG38;P0CG39	P63261	19	28	ACTG2;ACTA1;ACTC1;ACTA2;ACTG1;ACTB;POTEE;POTEF;POTEI;POTEJ	Actin, gamma-enteric smooth muscle;Actin, alpha skeletal muscle;Actin, alpha cardiac muscle 1;Actin, aortic smooth muscle;Actin, cytoplasmic 2;Actin, cytoplasmic 2, N-terminally processed;Actin, cytoplasmic 1;Actin, cytoplasmic 1, N-terminally processed;POTE ankyrin domain family member E;POTE ankyrin domain family member F;POTE ankyrin domain family member I;POTE ankyrin domain family member J	no	no	2	3.8371e-12	156.75	By MS/MS	By MS/MS	By MS/MS		By MS/MS
AGFRPVEAGGQHGGR	APRNYSRSGGFKEGRAGFRPVEAGGQHGGR	AGFRPVEAGGQHGGRSGETVKHEISYRSRR	R	A	G	G	R	S	2	2	0	0	0	1	1	5	1	0	0	0	0	1	1	0	0	0	0	1	0	0	15	1	1494.74	O15234	O15234	324	338	CASC3	Protein CASC3	yes	yes	3	0.0040344	65.092	By MS/MS
AGLQFPVGR	QGGKARAKAKTRSSRAGLQFPVGRVHRLLR	KTRSSRAGLQFPVGRVHRLLRKGNYAERVG	R	A	G	G	R	V	1	1	0	0	0	1	0	2	0	0	1	0	0	1	1	0	0	0	0	1	0	0	9	0	943.524	P0C0S5;Q71UI9;Q96QV6;Q16777;Q6FI13;Q99878;Q96KK5;Q9BTM1;P20671;P0C0S8;Q93077;Q7L7L0;P04908;P16104;Q8IUE6	Q99878	22	30	H2AFZ;H2AFV;HIST1H2AA;HIST2H2AC;HIST2H2AA3;HIST1H2AJ;HIST1H2AH;H2AFJ;HIST1H2AD;HIST1H2AG;HIST1H2AC;HIST3H2A;HIST1H2AB;H2AFX;HIST2H2AB	Histone H2A.Z;Histone H2A.V;Histone H2A type 1-A;Histone H2A type 2-C;Histone H2A type 2-A;Histone H2A type 1-J;Histone H2A type 1-H;Histone H2A.J;Histone H2A type 1-D;Histone H2A type 1;Histone H2A type 1-C;Histone H2A type 3;Histone H2A type 1-B/E;Histone H2AX;Histone H2A type 2-B	no	no	2	0.00015521	113.7
AGLVDDFEK	PPAIDWAYYKANVAKAGLVDDFEKKFNALK	KANVAKAGLVDDFEKKFNALKVPVPEDKYT	K	A	G	E	K	K	1	0	0	2	0	0	1	1	0	0	1	1	0	1	0	0	0	0	0	1	0	0	9	0	992.481	O75947	O75947	64	72	ATP5H	ATP synthase subunit d, mitochondrial	yes	yes	2	0.0037006	103.56	By MS/MS	By MS/MS	By MS/MS	By MS/MS	By MS/MS
AGLVDDFEKK	PPAIDWAYYKANVAKAGLVDDFEKKFNALK	ANVAKAGLVDDFEKKFNALKVPVPEDKYTA	K	A	G	K	K	F	1	0	0	2	0	0	1	1	0	0	1	2	0	1	0	0	0	0	0	1	0	0	10	1	1120.58	O75947	O75947	64	73	ATP5H	ATP synthase subunit d, mitochondrial	yes	yes	2	0.02481	85.731		By MS/MS
AGPESDAQYQFTGIK	______________________________	AGPESDAQYQFTGIKKYFNSYTLTGRMNCV	M	A	G	I	K	K	2	0	0	1	0	2	1	2	0	1	0	1	0	1	1	1	1	0	1	0	0	0	15	0	1610.76	Q96IX5	Q96IX5	2	16	USMG5	Up-regulated during skeletal muscle growth protein 5	yes	yes	2	1.1785e-11	87.001			By MS/MS	By MS/MS
AGPESDAQYQFTGIKK	______________________________	GPESDAQYQFTGIKKYFNSYTLTGRMNCVL	M	A	G	K	K	Y	2	0	0	1	0	2	1	2	0	1	0	2	0	1	1	1	1	0	1	0	0	0	16	1	1738.85	Q96IX5	Q96IX5	2	17	USMG5	Up-regulated during skeletal muscle growth protein 5	yes	yes	3	4.6752e-22	121.99	By matching	By MS/MS	By matching	By matching
AGQAFRK	______________________________	______________________________	M	A	G	R	K	F	2	1	0	0	0	1	0	1	0	0	0	1	0	1	0	0	0	0	0	0	0	0	7	1	776.429	P61604	P61604	2	8	HSPE1	10 kDa heat shock protein, mitochondrial	yes	yes	2	0.013396	81.864		By MS/MS
AGSEGLQQVVGMK	SAGSQKAGSGEGPGKAGSEGLQQVVGMKKS	GKAGSEGLQQVVGMKKSGGGDSERAAALSP	K	A	G	M	K	K	1	0	0	0	0	2	1	3	0	0	1	1	1	0	0	1	0	0	0	2	0	0	13	0	1302.66	Q8WZA9	Q8WZA9	389	401	IRGQ	Immunity-related GTPase family Q protein	yes	yes	2	8.3679e-20	147.95	By matching	By matching	By MS/MS	By MS/MS	By MS/MS
AGTALKR	______________________________	______________________________	M	A	G	K	R	L	2	1	0	0	0	0	0	1	0	0	1	1	0	0	0	0	1	0	0	0	0	0	7	1	715.434	P60604	P60604	2	8	UBE2G2	Ubiquitin-conjugating enzyme E2 G2	yes	yes	2	0.0064943	94.163	By MS/MS	By MS/MS	By MS/MS
AGTGLVAGEVVVDALPYFDQGYEAPGVR	______________________________	ALPYFDQGYEAPGVREAAAALVEEETRRYR	M	A	G	V	R	E	4	1	0	2	0	1	2	5	0	0	2	0	0	1	2	0	1	0	2	5	0	0	28	0	2849.42	O75934	O75934	2	29	BCAS2	Pre-mRNA-splicing factor SPF27	yes	yes	3	5.7735e-12	82.849		By MS/MS
AGTGVDNVDLEAATR	ADVINAAEKLQVVGRAGTGVDNVDLEAATR	AGTGVDNVDLEAATRKGILVMNTPNGNSLS	R	A	G	T	R	K	3	1	1	2	0	0	1	2	0	0	1	0	0	0	0	0	2	0	0	2	0	0	15	0	1487.72	O43175	O43175	76	90	PHGDH	D-3-phosphoglycerate dehydrogenase	yes	yes	2	9.0649e-19	124.86	By MS/MS	By MS/MS	By MS/MS	By MS/MS	By MS/MS
AGTGVDNVDLEAATRK	ADVINAAEKLQVVGRAGTGVDNVDLEAATR	GTGVDNVDLEAATRKGILVMNTPNGNSLSA	R	A	G	R	K	G	3	1	1	2	0	0	1	2	0	0	1	1	0	0	0	0	2	0	0	2	0	0	16	1	1615.82	O43175	O43175	76	91	PHGDH	D-3-phosphoglycerate dehydrogenase	yes	yes	3	0.00027681	73.498	By MS/MS	By MS/MS
AGVLAGHDNR	DDFNCNVWDALKADRAGVLAGHDNRVSCLG	LKADRAGVLAGHDNRVSCLGVTDDGMAVAT	R	A	G	N	R	V	2	1	1	1	0	0	0	2	1	0	1	0	0	0	0	0	0	0	0	1	0	0	10	0	1008.51	P62873;Q9HAV0;P62879	P62873	305	314	GNB1;GNB4;GNB2	Guanine nucleotide-binding protein G(I)/G(S)/G(T) subunit beta-1;Guanine nucleotide-binding protein subunit beta-4;Guanine nucleotide-binding protein G(I)/G(S)/G(T) subunit beta-2	no	no	2;3	0.0049028	78.334	By matching	By MS/MS
AGVNTVTTLVENK	AGKGDVPTKRPPVLRAGVNTVTTLVENKKA	LRAGVNTVTTLVENKKAQLVVIAHDVDPIE	R	A	G	N	K	K	1	0	2	0	0	0	1	1	0	0	1	1	0	0	0	0	3	0	0	3	0	0	13	0	1344.72	P62424	P62424	138	150	RPL7A	60S ribosomal protein L7a	yes	yes	2	0.00015855	96.171		By matching
AHAAQVTCVAASPHK	KVWDLAQQVVLSSYRAHAAQVTCVAASPHK	AHAAQVTCVAASPHKDSVFLSCSEDNRILL	R	A	H	H	K	D	5	0	0	0	1	1	0	0	2	0	0	1	0	0	1	1	1	0	0	2	0	0	15	0	1546.77	Q9BQA1	Q9BQA1	165	179	WDR77	Methylosome protein 50	yes	yes	2;3;4	3.2606e-94	217.09	By MS/MS	By MS/MS	By MS/MS	By MS/MS	By MS/MS
AHAAQVTCVAASPHKDSVFLSCSEDNR	KVWDLAQQVVLSSYRAHAAQVTCVAASPHK	PHKDSVFLSCSEDNRILLWDTRCPKPASQI	R	A	H	N	R	I	5	1	1	2	2	1	1	0	2	0	1	1	0	1	1	4	1	0	0	3	0	0	27	1	2956.36	Q9BQA1	Q9BQA1	165	191	WDR77	Methylosome protein 50	yes	yes	3;4;5	0	296.29	By MS/MS	By MS/MS	By MS/MS	By MS/MS	By MS/MS
AHFPGPVTR	RERALGLASGELAARAHFPGPVTRAEVEAR	GELAARAHFPGPVTRAEVEARLGAWAGEGT	R	A	H	T	R	A	1	1	0	0	0	0	0	1	1	0	0	0	0	1	2	0	1	0	0	1	0	0	9	0	980.519	Q8WZA9	Q8WZA9	545	553	IRGQ	Immunity-related GTPase family Q protein	yes	yes	2	0.0055722	94.302	By matching	By matching	By matching	By matching	By matching
AHGGYSVFAGVGER	GKTVLIMELINNVAKAHGGYSVFAGVGERT	KAHGGYSVFAGVGERTREGNDLYHEMIESG	K	A	H	E	R	T	2	1	0	0	0	0	1	4	1	0	0	0	0	1	0	1	0	0	1	2	0	0	14	0	1405.67	P06576	P06576	226	239	ATP5B	ATP synthase subunit beta, mitochondrial	yes	yes	2;3	2.9097e-05	99.522	By MS/MS	By MS/MS	By MS/MS	By MS/MS	By matching
AHPPTQILNR	ADTALASIPPVAEGKAHPPTQILNRERETV	VAEGKAHPPTQILNRERETVPVELEPKRTI	K	A	H	N	R	E	1	1	1	0	0	1	0	0	1	1	1	0	0	0	2	0	1	0	0	0	0	0	10	0	1145.63	Q01804	Q01804	961	970	OTUD4	OTU domain-containing protein 4	yes	yes	2;3	8.0266e-06	116.52		By MS/MS	By MS/MS
AHRTEFYR	HVKLSDFGLCTGLKKAHRTEFYRNLNHSLP	LCTGLKKAHRTEFYRNLNHSLPSDFTFQNM	K	A	H	Y	R	N	1	2	0	0	0	0	1	0	1	0	0	0	0	1	0	0	1	0	1	0	0	0	8	1	1078.53	Q15208;Q9Y2H1	Q15208	240	247	STK38;STK38L	Serine/threonine-protein kinase 38;Serine/threonine-protein kinase 38-like	no	no	3	0.0011616	121.09	By matching	By MS/MS
AIADTGANVVVTGGK	NFSKGEENLMDAQVKAIADTGANVVVTGGK	AIADTGANVVVTGGKVADMALHYANKYNIM	K	A	I	G	K	V	3	0	1	1	0	0	0	3	0	1	0	1	0	0	0	0	2	0	0	3	0	0	15	0	1371.74	P50990	P50990	282	296	CCT8	T-complex protein 1 subunit theta	yes	yes	2	5.057e-08	106.49	By matching	By MS/MS	By matching
AIAELGIYPAVDPLDSTSR	ATTFAHLDATTVLSRAIAELGIYPAVDPLD	LGIYPAVDPLDSTSRIMDPNIVGSEHYDVA	R	A	I	S	R	I	3	1	0	2	0	0	1	1	0	2	2	0	0	0	2	2	1	0	1	1	0	0	19	0	1987.03	P06576	P06576	388	406	ATP5B	ATP synthase subunit beta, mitochondrial	yes	yes	2	6.7695e-71	174.73	By MS/MS	By MS/MS	By MS/MS	By MS/MS	By MS/MS
AIEINPDSAQPYK	VKLQKPNAAIRDCDRAIEINPDSAQPYKRR	DRAIEINPDSAQPYKRRGKAHRLLGHWEEA	R	A	I	Y	K	R	2	0	1	1	0	1	1	0	0	2	0	1	0	0	2	1	0	0	1	0	0	0	13	0	1444.72	Q8IZP2;P50502;Q8NFI4	Q8IZP2	170	182	ST13P4;ST13;ST13P5	Putative protein FAM10A4;Hsc70-interacting protein;Putative protein FAM10A5	yes	no	2	9.3118e-05	74.162			By MS/MS	By MS/MS
AIFQTIQNR	IDDEDNPVDEYQIFKAIFQTIQNRNPVWYQ	EYQIFKAIFQTIQNRNPVWYQALTHGLNEE	K	A	I	N	R	N	1	1	1	0	0	2	0	0	0	2	0	0	0	1	0	0	1	0	0	0	0	0	9	0	1089.59	O95373	O95373	964	972	IPO7	Importin-7	yes	yes	2	0.00094486	120.49	By MS/MS	By MS/MS	By MS/MS	By MS/MS
AIGGGLSSVGGGSSTIK	SGLGIGGGFSSSSGRAIGGGLSSVGGGSST	GGGLSSVGGGSSTIKYTTTSSSSRKSYKH_	R	A	I	I	K	Y	1	0	0	0	0	0	0	6	0	2	1	1	0	0	0	4	1	0	0	1	0	0	17	0	1446.77	CON__P02538;P02538;CON__P48668;P48668	CON__P48668	534	550	KRT6A;KRT6C	Keratin, type II cytoskeletal 6A;Keratin, type II cytoskeletal 6C	no	no	2	3.7546e-07	95.018	By MS/MS	By MS/MS	By MS/MS	By MS/MS	By MS/MS
AIGNNSATSPR	SMGPAFIHHHPPKSRAIGNNSATSPRVVVT	PKSRAIGNNSATSPRVVVTQPNTKYTFKIT	R	A	I	P	R	V	2	1	2	0	0	0	0	1	0	1	0	0	0	0	1	2	1	0	0	0	0	0	11	0	1086.54	Q9NYJ8	Q9NYJ8	442	452	TAB2	TGF-beta-activated kinase 1 and MAP3K7-binding protein 2	yes	yes	2	0.00021536	82.749		By MS/MS
AIGSASEGAQSSLQEVYHK	FHMDPSGTFVQCDARAIGSASEGAQSSLQE	ASEGAQSSLQEVYHKSMTLKEAIKSSLIIL	R	A	I	H	K	S	3	0	0	0	0	2	2	2	1	1	1	1	0	0	0	4	0	0	1	1	0	0	19	0	1960.95	P28066	P28066	169	187	PSMA5	Proteasome subunit alpha type-5	yes	yes	3	3.1659e-27	126.07		By MS/MS
AIKEKEYEIER	CEKENLGWQKLESEKAIKEKEYEIERLRVL	ESEKAIKEKEYEIERLRVLLQEEGTRKREY	K	A	I	E	R	L	1	1	0	0	0	0	4	0	0	2	0	2	0	0	0	0	0	0	1	0	0	0	11	2	1406.74	P15924	P15924	1163	1173	DSP	Desmoplakin	yes	yes	3	0.030825	55.452		By matching
AILVDLEPGTMDSVR	SVYYNEATGGKYVPRAILVDLEPGTMDSVR	AILVDLEPGTMDSVRSGPFGQIFRPDNFVF	R	A	I	V	R	S	1	1	0	2	0	0	1	1	0	1	2	0	1	0	1	1	1	0	0	2	0	0	15	0	1614.83	P07437;Q13885;Q9BVA1	P07437	63	77	TUBB;TUBB2A;TUBB2B	Tubulin beta chain;Tubulin beta-2A chain;Tubulin beta-2B chain	no	no	2	3.1187e-47	178.67	By MS/MS	By MS/MS	By MS/MS	By MS/MS	By MS/MS
AITGASLADIMAK	EIQKKRTRRAVKFQRAITGASLADIMAKRN	QRAITGASLADIMAKRNQKPEVRKAQREQA	R	A	I	A	K	R	4	0	0	1	0	0	0	1	0	2	1	1	1	0	0	1	1	0	0	0	0	0	13	0	1260.67	P83731	P83731	81	93	RPL24	60S ribosomal protein L24	yes	yes	2	2.0915e-13	127.42		By MS/MS
AIVPPYSLCQTGEDLPKDK	DPLYPGFPCNEKGDRAIVPPYSLCQTGEDL	PYSLCQTGEDLPKDKNILRFFFNLGVKAYS	R	A	I	D	K	N	1	0	0	2	1	1	1	1	0	1	2	2	0	0	3	1	1	0	1	1	0	0	19	1	2130.07	Q01804	Q01804	678	696	OTUD4	OTU domain-containing protein 4	yes	yes	3	0.0086384	69.605	By matching	By MS/MS	By MS/MS	By MS/MS
AIVTGKDCPHMKEK	TFESLQEKIPVADIKAIVTGKDCPHMKEKS	KAIVTGKDCPHMKEKSALKQNKEVLELAFS	K	A	I	E	K	S	1	0	0	1	1	0	1	1	1	1	0	3	1	0	1	0	1	0	0	1	0	0	14	2	1612.81	Q96JJ3	Q96JJ3	608	621	ELMO2	Engulfment and cell motility protein 2	yes	yes	4	0.013219	43.184		By MS/MS
AKDLILR	KETLTFPPEVPISEKAKDLILRFCCEWEHR	PEVPISEKAKDLILRFCCEWEHRIGAPGVE	K	A	K	L	R	F	1	1	0	1	0	0	0	0	0	1	2	1	0	0	0	0	0	0	0	0	0	0	7	1	827.523	Q15208;Q9Y2H1	Q15208	353	359	STK38;STK38L	Serine/threonine-protein kinase 38;Serine/threonine-protein kinase 38-like	no	no	2	0.0085036	152.47	By MS/MS	By MS/MS	By matching	By MS/MS	By matching
AKEFTNVYIK	RFKSRKEREAELGARAKEFTNVYIKNFGED	ELGARAKEFTNVYIKNFGEDMDDERLKDLF	R	A	K	I	K	N	1	0	1	0	0	0	1	0	0	1	0	2	0	1	0	0	1	0	1	1	0	0	10	1	1211.65	P11940;Q13310	P11940	187	196	PABPC1;PABPC4	Polyadenylate-binding protein 1;Polyadenylate-binding protein 4	no	no	3	0.036149	51.927	By matching	By matching	By matching	By matching
AKLAQYEPPQEEK	KEKYEAIVEENKKLKAKLAQYEPPQEEKRA	LKAKLAQYEPPQEEKRAE____________	K	A	K	E	K	R	2	0	0	0	0	2	3	0	0	0	1	2	0	0	2	0	0	0	1	0	0	0	13	1	1529.77	Q99417	Q99417	88	100	MYCBP	C-Myc-binding protein	yes	yes	3	0.00074869	84.297	By matching	By MS/MS
AKLDNLDEEWATEHACQVSR	TPPKEEQSENLKHPKAKLDNLDEEWATEHA	LDEEWATEHACQVSRMLPGGLLVLGVFIIT	K	A	K	S	R	M	3	1	1	2	1	1	3	0	1	0	2	1	0	0	0	1	1	1	0	1	0	0	20	1	2371.09	Q5SWX8	Q5SWX8	62	81	ODR4	Protein odr-4 homolog	yes	yes	3	0.019069	56.9	By MS/MS
ALAAAGYDVEK	VSQERVGMSLVALKKALAAAGYDVEKNNSR	ALKKALAAAGYDVEKNNSRIKLSLKSLVNK	K	A	L	E	K	N	4	0	0	1	0	0	1	1	0	0	1	1	0	0	0	0	0	0	1	1	0	0	11	0	1106.56	P22492;P16403;Q02539;P10412;P16402	P22492	69	79	HIST1H1T;HIST1H1C;HIST1H1A;HIST1H1E;HIST1H1D	Histone H1t;Histone H1.2;Histone H1.1;Histone H1.4;Histone H1.3	yes	no	2	0.00075771	93.111			By matching
ALAAPAAEEKEEAREK	______________________________	LAAPAAEEKEEAREKMLAAKSADGSAPAGE	R	A	L	E	K	M	6	1	0	0	0	0	5	0	0	0	1	2	0	0	1	0	0	0	0	0	0	0	16	2	1711.87	Q01650	Q01650	10	25	SLC7A5	Large neutral amino acids transporter small subunit 1	yes	yes	3	2.8236e-07	97.836		By MS/MS	By MS/MS
ALADHSMAQTPR	LVGNEAVDQLVKFNRALADHSMAQTPRLID	FNRALADHSMAQTPRLIDGIVLTKFDTIDD	R	A	L	P	R	L	3	1	0	1	0	1	0	0	1	0	1	0	1	0	1	1	1	0	0	0	0	0	12	0	1296.62	P08240	P08240	569	580	SRPR	Signal recognition particle receptor subunit alpha	yes	yes	3	0.0011409	67.519	By matching	By MS/MS
ALAEYVVQQEGAK	PKLIGDRPNTYIYTKALAEYVVQQEGAKLN	TKALAEYVVQQEGAKLNVAIVRPSIVGASW	K	A	L	A	K	L	3	0	0	0	0	2	2	1	0	0	1	1	0	0	0	0	0	0	1	2	0	0	13	0	1404.72	Q8WVX9	Q8WVX9	209	221	FAR1	Fatty acyl-CoA reductase 1	yes	yes	2	2.6027e-09	90.108	By MS/MS
ALALAALAAVEPACGSR	______________________________	ALAALAAVEPACGSRYQQLQNEEESGEPEQ	M	A	L	S	R	Y	7	1	0	0	1	0	1	1	0	0	3	0	0	0	1	1	0	0	0	1	0	0	17	0	1639.87	Q9BT67	Q9BT67	2	18	NDFIP1	NEDD4 family-interacting protein 1	yes	yes	2	6.4104e-43	159.94	By MS/MS	By MS/MS	By MS/MS	By MS/MS	By MS/MS
ALANSLACQGK	KKENLKAAQEEYVKRALANSLACQGKYTPS	YVKRALANSLACQGKYTPSGQAGAAASESL	R	A	L	G	K	Y	3	0	1	0	1	1	0	1	0	0	2	1	0	0	0	1	0	0	0	0	0	0	11	0	1131.57	P04075	P04075	332	342	ALDOA	Fructose-bisphosphate aldolase A	yes	yes	2	6.2959e-12	105.57
ALANVNIGSLICNVGAGGPAPAAGAAPAGGPAPSTAAAPAEEK	AGVNVEPFWPGLFAKALANVNIGSLICNVG	GGPAPSTAAAPAEEKKVEAKKEESEESDDD	K	A	L	E	K	K	14	0	3	0	1	0	2	7	0	2	2	1	0	0	6	2	1	0	0	2	0	0	43	0	3807.92	P05386	P05386	50	92	RPLP1	60S acidic ribosomal protein P1	yes	yes	3;4	9.2151e-32	79.907	By matching		By matching	By MS/MS
ALAQLEGEAGR				A	L	G	R		3	1	0	0	0	1	2	2	0	0	2	0	0	0	0	0	0	0	0	0	0	0	11	0	1113.58		REV__Q15149					yes	yes	2	0.0017289	86.953
ALCDVGTAISCSR	ALHVKAARARDRDYRALCDVGTAISCSRVF	YRALCDVGTAISCSRVFSSRWGRGFGLVEH	R	A	L	S	R	V	2	1	0	1	2	0	0	1	0	1	1	0	0	0	0	2	1	0	0	1	0	0	13	0	1408.64	Q9BQB6	Q9BQB6	41	53	VKORC1	Vitamin K epoxide reductase complex subunit 1	yes	yes	2	1.7029e-13	129.16	By MS/MS	By MS/MS	By MS/MS
ALCMVCGAEIR	EQEFLVGSSPGGSGRALCMVCGAEIRAPSA	GSGRALCMVCGAEIRAPSADTARSHILEQH	R	A	L	I	R	A	2	1	0	0	2	0	1	1	0	1	1	0	1	0	0	0	0	0	0	1	0	0	11	0	1278.59	Q9BUA3	Q9BUA3	89	99	C11orf84	Uncharacterized protein C11orf84	yes	yes	2	5.5608e-18	161.92	By MS/MS	By MS/MS	By MS/MS	By MS/MS	By MS/MS
ALCMVCGAEIRAPSADTAR	EQEFLVGSSPGGSGRALCMVCGAEIRAPSA	VCGAEIRAPSADTARSHILEQHPHTLDLSP	R	A	L	A	R	S	5	2	0	1	2	0	1	1	0	1	1	0	1	0	1	1	1	0	0	1	0	0	19	1	2047.96	Q9BUA3	Q9BUA3	89	107	C11orf84	Uncharacterized protein C11orf84	yes	yes	3	1.0885e-14	106.94	By matching	By MS/MS
ALCWVCAQSR	VHGERLHLFCEKDGKALCWVCAQSRKHRDH	EKDGKALCWVCAQSRKHRDHAMVPLEEAAQ	K	A	L	S	R	K	2	1	0	0	2	1	0	0	0	0	1	0	0	0	0	1	0	1	0	1	0	0	10	0	1249.57	P19474	P19474	109	118	TRIM21	E3 ubiquitin-protein ligase TRIM21	yes	yes	2	0.022407	64.485	By matching	By MS/MS	By matching	By matching
ALDEMEKQQR	AQPGTFEFEYASRWKALDEMEKQQREQVDR	ASRWKALDEMEKQQREQVDRNIREAKEKLE	K	A	L	Q	R	E	1	1	0	1	0	2	2	0	0	0	1	1	1	0	0	0	0	0	0	0	0	0	10	1	1246.6	Q8WXF1	Q8WXF1	281	290	PSPC1	Paraspeckle component 1	yes	yes	3	0.0049516	74.841	By MS/MS	By MS/MS
ALDTMNFDVIK	GYAYVNFQQPADAERALDTMNFDVIKGKPV	DAERALDTMNFDVIKGKPVRIMWSQRDPSL	R	A	L	I	K	G	1	0	1	2	0	0	0	0	0	1	1	1	1	1	0	0	1	0	0	1	0	0	11	0	1265.63	P11940;Q13310	P11940	68	78	PABPC1;PABPC4	Polyadenylate-binding protein 1;Polyadenylate-binding protein 4	no	no	2	5.6107e-08	114.84	By MS/MS	By MS/MS	By MS/MS	By MS/MS
ALEAELAALR	AVFIEKVHQLETQNRALEAELAALRQRHAE	ETQNRALEAELAALRQRHAEPSRVGELFQR	R	A	L	L	R	Q	4	1	0	0	0	0	2	0	0	0	3	0	0	0	0	0	0	0	0	0	0	0	10	0	1055.6	Q16352	Q16352	121	130	INA	Alpha-internexin	yes	yes	2	3.5754e-05	81.548
ALEEANADLEVK	QNLNDRLASYLDKVRALEEANADLEVKIRD	KVRALEEANADLEVKIRDWYQRQRPAEIKD	R	A	L	V	K	I	3	0	1	1	0	0	3	0	0	0	2	1	0	0	0	0	0	0	0	1	0	0	12	0	1300.65	CON__P02533;P02533;CON__Q6IFX2;CON__P08779;P08779	CON__P02533	135	146	KRT14;KRT16	Keratin, type I cytoskeletal 14;Keratin, type I cytoskeletal 16	no	no	2	2.4269e-18	159.4			By MS/MS	By MS/MS	By MS/MS
ALEEANTELEVK	QNLNDRLASYLDKVRALEEANTELEVKIRD	KVRALEEANTELEVKIRDWYQRQAPGPARD	R	A	L	V	K	I	2	0	1	0	0	0	4	0	0	0	2	1	0	0	0	0	1	0	0	1	0	0	12	0	1344.68	CON__Q04695;Q04695;CON__Q9QWL7	CON__Q04695	104	115	KRT17	Keratin, type I cytoskeletal 17	yes	no	2	5.9269e-11	142.43				By MS/MS	By MS/MS
ALEENNNFSK	QLAEKREHEREVLQKALEENNNFSKMAEEK	EVLQKALEENNNFSKMAEEKLILKMEQIKE	K	A	L	S	K	M	1	0	3	0	0	0	2	0	0	0	1	1	0	1	0	1	0	0	0	0	0	0	10	0	1164.54	Q93045	Q93045	120	129	STMN2	Stathmin-2	yes	yes	2	0.0049028	78.334	By matching	By matching			By matching
ALEESNYELEGK	QNLNDRLASYLDKVRALEESNYELEGKIKE	KVRALEESNYELEGKIKEWYEKHGNSHQGE	R	A	L	G	K	I	1	0	1	0	0	0	4	1	0	0	2	1	0	0	0	1	0	0	1	0	0	0	12	0	1380.64	P13645;CON__P13645;CON__P02535-1	P13645	166	177	KRT10	Keratin, type I cytoskeletal 10	yes	no	2	6.8774e-19	163.34	By MS/MS	By MS/MS	By MS/MS	By MS/MS	By MS/MS
ALEESNYELEGKIK	QNLNDRLASYLDKVRALEESNYELEGKIKE	RALEESNYELEGKIKEWYEKHGNSHQGEPR	R	A	L	I	K	E	1	0	1	0	0	0	4	1	0	1	2	2	0	0	0	1	0	0	1	0	0	0	14	1	1621.82	P13645;CON__P13645;CON__P02535-1	P13645	166	179	KRT10	Keratin, type I cytoskeletal 10	yes	no	3	3.0535e-05	96.591		By MS/MS
ALGDYDYK	SVMIQRVNGSLAVSRALGDYDYKCVDGKGP	GSLAVSRALGDYDYKCVDGKGPTEQLVSPE	R	A	L	Y	K	C	1	0	0	2	0	0	0	1	0	0	1	1	0	0	0	0	0	0	2	0	0	0	8	0	943.429	O75688	O75688	201	208	PPM1B	Protein phosphatase 1B	yes	yes	2	0.041874	77.282	By matching	By matching	By MS/MS	By matching	By matching
ALGGEDVR	AEKQYGFCKGSVIQKALGGEDVRVTCTLFQ	KGSVIQKALGGEDVRVTCTLFQTQPVIPQP	K	A	L	V	R	V	1	1	0	1	0	0	1	2	0	0	1	0	0	0	0	0	0	0	0	1	0	0	8	0	815.414	CON__P12763	CON__P12763	238	245			yes	yes	2	0.039191	80.229	By MS/MS	By matching	By matching	By matching	By matching
ALGLASGELAAR	RGLGLEPTALARRERALGLASGELAARAHF	RERALGLASGELAARAHFPGPVTRAEVEAR	R	A	L	A	R	A	4	1	0	0	0	0	1	2	0	0	3	0	0	0	0	1	0	0	0	0	0	0	12	0	1127.63	Q8WZA9	Q8WZA9	533	544	IRGQ	Immunity-related GTPase family Q protein	yes	yes	2	6.8332e-09	129.38	By MS/MS	By MS/MS	By MS/MS	By MS/MS	By MS/MS
ALGQAASDNSGPEDAKR	IPLLLQLTSRLQGVRALGQAASDNSGPEDA	GQAASDNSGPEDAKRQAKKQKTRRT_____	R	A	L	K	R	Q	4	1	1	2	0	1	1	2	0	0	1	1	0	0	1	2	0	0	0	0	0	0	17	1	1685.8	Q15155	Q15155	1196	1212	NOMO1	Nodal modulator 1	yes	yes	3	0.00018885	78.285	By matching	By MS/MS	By MS/MS	By matching	By matching
ALGQNPTNAEVLK	GDGKILYSQCGDVMRALGQNPTNAEVLKVL	MRALGQNPTNAEVLKVLGNPKSDEMNVKVL	R	A	L	L	K	V	2	0	2	0	0	1	1	1	0	0	2	1	0	0	1	0	1	0	0	1	0	0	13	0	1353.73	P60660;P14649	P60660	38	50	MYL6;MYL6B	Myosin light polypeptide 6;Myosin light chain 6B	yes	no	2	2.0376e-56	193.83	By MS/MS	By MS/MS	By MS/MS	By MS/MS	By MS/MS
ALIAAQYSGAQVR	AGTLYTYPENWRAFKALIAAQYSGAQVRVL	FKALIAAQYSGAQVRVLSAPPHFHFGQTNR	K	A	L	V	R	V	4	1	0	0	0	2	0	1	0	1	1	0	0	0	0	1	0	0	1	1	0	0	13	0	1346.73	P26641	P26641	18	30	EEF1G	Elongation factor 1-gamma	yes	yes	2	0.00093033	88.681		By MS/MS
ALIEMEKQQQDQVDR	AQPGSFEYEYAMRWKALIEMEKQQQDQVDR	ALIEMEKQQQDQVDRNIKEAREKLEMEMEA	K	A	L	D	R	N	1	1	0	2	0	4	2	0	0	1	1	1	1	0	0	0	0	0	0	1	0	0	15	1	1829.89	Q15233	Q15233	273	287	NONO	Non-POU domain-containing octamer-binding protein	yes	yes	3	3.2402e-33	157.75	By MS/MS	By MS/MS
ALKAEGAALDCFEVTLK	______________________________	KAEGAALDCFEVTLKCEEGEDEEEAMVVAV	M	A	L	L	K	C	4	0	0	1	1	0	2	1	0	0	3	2	0	1	0	0	1	0	0	1	0	0	17	1	1834.95	Q9BUA3	Q9BUA3	2	18	C11orf84	Uncharacterized protein C11orf84	yes	yes	2	5.4943e-59	176.32	By MS/MS	By MS/MS	By MS/MS	By MS/MS
ALLANALTSALR	LPLLGLHEAASFYQRALLANALTSALRLHQ	YQRALLANALTSALRLHQRLPHFQLSRAFL	R	A	L	L	R	L	4	1	1	0	0	0	0	0	0	0	4	0	0	0	0	1	1	0	0	0	0	0	12	0	1212.72	P57088	P57088	58	69	TMEM33	Transmembrane protein 33	yes	yes	2	2.2552e-18	159.79	By MS/MS	By MS/MS	By MS/MS	By matching	By matching
ALLQAILQTEDMLK	NGVTDGYLNSLCTVRALLQAILQTEDMLKV	RALLQAILQTEDMLKVYEARLTEEETVCLD	R	A	L	L	K	V	2	0	0	1	0	2	1	0	0	1	4	1	1	0	0	0	1	0	0	0	0	0	14	0	1585.87	P15924	P15924	772	785	DSP	Desmoplakin	yes	yes	2	1.2724e-07	102.06
ALMGSPQLVAAVVR	AMIVNQLSKKEASRRALMGSPQLVAAVVRT	RALMGSPQLVAAVVRTMQNTSDLDTARCTT	R	A	L	V	R	T	3	1	0	0	0	1	0	1	0	0	2	0	1	0	1	1	0	0	0	3	0	0	14	0	1410.8	P14923	P14923	178	191	JUP	Junction plakoglobin	yes	yes	2	4.3094e-08	107.79
ALMLQGVDLLADAVAVTMGPK	TRAYAKDVKFGADARALMLQGVDLLADAVA	VDLLADAVAVTMGPKGRTVIIEQSWGSPKV	R	A	L	P	K	G	4	0	0	2	0	1	0	2	0	0	4	1	2	0	1	0	1	0	0	3	0	0	21	0	2112.13	P10809	P10809	38	58	HSPD1	60 kDa heat shock protein, mitochondrial	yes	yes	3	1.0774e-12	92.932	By MS/MS	By MS/MS	By MS/MS
ALNSMGQDLERPLELR	IVDREVTPFFIIYCRALNSMGQDLERPLEL	LNSMGQDLERPLELRVRVLDINDNPPVFSM	R	A	L	L	R	V	1	2	1	1	0	1	2	1	0	0	4	0	1	0	1	1	0	0	0	0	0	0	16	1	1840.95	Q02413	Q02413	129	144	DSG1	Desmoglein-1	yes	yes	3	7.2532e-06	89.541				By matching
ALPPAQAGALLLALPPASPSAAR	LRPGGLPGLCEWLRRALPPAQAGALLLALP	ALLLALPPASPSAARTKAAALRAGAWRPAL	R	A	L	A	R	T	8	1	0	0	0	1	0	1	0	0	5	0	0	0	5	2	0	0	0	0	0	0	23	0	2152.24	Q8WZA9	Q8WZA9	449	471	IRGQ	Immunity-related GTPase family Q protein	yes	yes	3	1.0328e-05	78.975
ALPSKPNSLDQFK	DFNKVMQVVREQITRALPSKPNSLDQFKSK	TRALPSKPNSLDQFKSKLRSLSYSEILRLR	R	A	L	F	K	S	1	0	1	1	0	1	0	0	0	0	2	2	0	1	2	2	0	0	0	0	0	0	13	1	1443.77	Q96JJ3	Q96JJ3	484	496	ELMO2	Engulfment and cell motility protein 2	yes	yes	3	0.001697	71.548	By matching	By MS/MS	By matching	By MS/MS	By matching
ALQASALK	CPLLKPWALTFSYGRALQASALKAWGGKKE	LTFSYGRALQASALKAWGGKKENLKAAQEE	R	A	L	L	K	A	3	0	0	0	0	1	0	0	0	0	2	1	0	0	0	1	0	0	0	0	0	0	8	0	800.476	P04075	P04075	305	312	ALDOA	Fructose-bisphosphate aldolase A	yes	yes	2	0.015094	97.093		By MS/MS	By matching
ALQATVGNSYK	DARDPAFKAANGSLRALQATVGNSYKCNAE	GSLRALQATVGNSYKCNAEEHVRVTKAFSV	R	A	L	Y	K	C	2	0	1	0	0	1	0	1	0	0	1	1	0	0	0	1	1	0	1	1	0	0	11	0	1150.6	P11279	P11279	327	337	LAMP1	Lysosome-associated membrane glycoprotein 1	yes	yes	2	0.00015734	100.02		By MS/MS	By matching
ALQSGQCAGAALDVFTEEPPRDR	NCARGGIVDEGALLRALQSGQCAGAALDVF	GAALDVFTEEPPRDRALVDHENVISCPHLG	R	A	L	D	R	A	4	2	0	2	1	2	2	2	0	0	2	0	0	1	2	1	1	0	0	1	0	0	23	1	2487.18	O43175	O43175	248	270	PHGDH	D-3-phosphoglycerate dehydrogenase	yes	yes	3	4.3162e-21	110.44	By MS/MS	By MS/MS	By matching	By matching
ALRDAKLDK	LNADLFRGTLDPVEKALRDAKLDKSQIHDI	LDPVEKALRDAKLDKSQIHDIVLVGGSTRI	K	A	L	D	K	S	2	1	0	2	0	0	0	0	0	0	2	2	0	0	0	0	0	0	0	0	0	0	9	2	1028.6	P0DMV9;P0DMV8;P11142;P54652;P17066;P48741	P11142	320	328	HSPA1B;HSPA1A;HSPA8;HSPA2;HSPA6;HSPA7	Heat shock 70 kDa protein 1B;Heat shock 70 kDa protein 1A;Heat shock cognate 71 kDa protein;Heat shock-related 70 kDa protein 2;Heat shock 70 kDa protein 6;Putative heat shock 70 kDa protein 7	no	no	3	0.014793	72.2	By matching	By MS/MS
ALRTDYNASVSVPDSSGPER	KNAGAVIGKGGKNIKALRTDYNASVSVPDS	YNASVSVPDSSGPERILSISADIETIGEIL	K	A	L	E	R	I	2	2	1	2	0	0	1	1	0	0	1	0	0	0	2	4	1	0	1	2	0	0	20	1	2120.01	P61978	P61978	67	86	HNRNPK	Heterogeneous nuclear ribonucleoprotein K	yes	yes	3	4.199e-07	88.755		By MS/MS
ALSAVSAQAAAAQK	QPVPVVKPAVLPGTKALSAVSAQAAAAQKN	KALSAVSAQAAAAQKNKLKEPGGGSFRDDD	K	A	L	Q	K	N	7	0	0	0	0	2	0	0	0	0	1	1	0	0	0	2	0	0	0	1	0	0	14	0	1285.7	O00268	O00268	804	817	TAF4	Transcription initiation factor TFIID subunit 4	yes	yes	2	2.1791e-07	102.52		By matching	By MS/MS
ALSPAELR	ERLRVQSPEPPAPERALSPAELRALEAEKR	EPPAPERALSPAELRALEAEKRALWRAARM	R	A	L	L	R	A	2	1	0	0	0	0	1	0	0	0	2	0	0	0	1	1	0	0	0	0	0	0	8	0	855.481	Q14160	Q14160	1484	1491	SCRIB	Protein scribble homolog	yes	yes	2	0.044752	74.439		By matching
ALTSEIALLQSR	STLNSGKKSLETEHKALTSEIALLQSRLKT	EHKALTSEIALLQSRLKTEGSDLCDRVSEM	K	A	L	S	R	L	2	1	0	0	0	1	1	0	0	1	3	0	0	0	0	2	1	0	0	0	0	0	12	0	1300.74	P04843	P04843	525	536	RPN1	Dolichyl-diphosphooligosaccharide--protein glycosyltransferase subunit 1	yes	yes	2	8.4952e-09	123.79	By matching	By matching	By MS/MS	By MS/MS	By MS/MS
ALTVPELTQQMFDAK	PGFAPLTSRGSQQYRALTVPELTQQMFDAK	ALTVPELTQQMFDAKNMMAACDPRHGRYLT	R	A	L	A	K	N	2	0	0	1	0	2	1	0	0	0	2	1	1	1	1	0	2	0	0	1	0	0	15	0	1690.86	P68371;P04350	P68371	283	297	TUBB4B;TUBB4A	Tubulin beta-4B chain;Tubulin beta-4A chain	no	no	2	4.4719e-47	176.8	By MS/MS	By MS/MS	By matching	By MS/MS	By matching
ALTVPELTQQMFDSK	PGFAPLTSRGSQQYRALTVPELTQQMFDSK	ALTVPELTQQMFDSKNMMAACDPRHGRYLT	R	A	L	S	K	N	1	0	0	1	0	2	1	0	0	0	2	1	1	1	1	1	2	0	0	1	0	0	15	0	1706.85	Q13885;Q9BVA1	Q9BVA1	283	297	TUBB2A;TUBB2B	Tubulin beta-2A chain;Tubulin beta-2B chain	no	no	2	1.5474e-05	99.215	By matching	By matching	By matching
ALTVPELTQQVFDAK	PGFAPLTSRGSQQYRALTVPELTQQVFDAK	ALTVPELTQQVFDAKNMMAACDPRHGRYLT	R	A	L	A	K	N	2	0	0	1	0	2	1	0	0	0	2	1	0	1	1	0	2	0	0	2	0	0	15	0	1658.89	P07437	P07437	283	297	TUBB	Tubulin beta chain	yes	yes	2;3	5.909e-56	183.99	By MS/MS	By MS/MS	By MS/MS	By MS/MS	By MS/MS
ALVADSHPESER	EDYAETVHQLSKTSRALVADSHPESERISM	TSRALVADSHPESERISMRQSKVDKLYAGL	R	A	L	E	R	I	2	1	0	1	0	0	2	0	1	0	1	0	0	0	1	2	0	0	0	1	0	0	12	0	1309.63	Q01082	Q01082	1657	1668	SPTBN1	Spectrin beta chain, non-erythrocytic 1	yes	yes	2	0.0020431	76.465		By MS/MS
ALVATPGK	KAVTTPGKKGATPGKALVATPGKKGAAIPA	KGATPGKALVATPGKKGAAIPAKGAKNGKN	K	A	L	G	K	K	2	0	0	0	0	0	0	1	0	0	1	1	0	0	1	0	1	0	0	1	0	0	8	0	755.454	P19338	P19338	117	124	NCL	Nucleolin	yes	yes	2	0.016854	94.662		By MS/MS
ALVDHENVISCPHLGASTK	GAALDVFTEEPPRDRALVDHENVISCPHLG	HENVISCPHLGASTKEAQSRCGEEIAVQFV	R	A	L	T	K	E	2	0	1	1	1	0	1	1	2	1	2	1	0	0	1	2	1	0	0	2	0	0	19	0	2047.02	O43175	O43175	271	289	PHGDH	D-3-phosphoglycerate dehydrogenase	yes	yes	3;4	6.2666e-36	135.49	By MS/MS	By MS/MS	By MS/MS	By MS/MS	By matching
ALYDAELSQMQTHISDTSVVLSMDNNR	QAKADTLTDEINFLRALYDAELSQMQTHIS	HISDTSVVLSMDNNRNLDLDSIIAEVKAQY	R	A	L	N	R	N	2	1	2	3	0	2	1	0	1	1	3	0	2	0	0	4	2	0	1	2	0	0	27	0	3037.41	CON__P02538;P02538;CON__P04259;CON__P48668;P48668;P04259	CON__P04259	300	326	KRT6A;KRT6C;KRT6B	Keratin, type II cytoskeletal 6A;Keratin, type II cytoskeletal 6C;Keratin, type II cytoskeletal 6B	no	no	3	3.3402e-11	81.683				By MS/MS
ALYDTFSAFGNILSCK	GNIFIKNLDKSIDNKALYDTFSAFGNILSC	LYDTFSAFGNILSCKVVCDENGSKGYGFVH	K	A	L	C	K	V	2	0	1	1	1	0	0	1	0	1	2	1	0	2	0	2	1	0	1	0	0	0	16	0	1805.87	P11940;Q13310	P11940	114	129	PABPC1;PABPC4	Polyadenylate-binding protein 1;Polyadenylate-binding protein 4	no	no	2	6.0538e-30	137.59	By MS/MS	By matching	By matching
ALYEQEIR	LLVLRQKHSEPSRFRALYEQEIRDLRLAAE	SEPSRFRALYEQEIRDLRLAAEDATNEKQA	R	A	L	I	R	D	1	1	0	0	0	1	2	0	0	1	1	0	0	0	0	0	0	0	1	0	0	0	8	0	1020.52	P07196	P07196	137	144	NEFL	Neurofilament light polypeptide	yes	yes	2	0.040204	79.116	By matching		By matching		By matching
ALYETELADAR	TEREEVRGRELTGLKALYETELADARRALD	TGLKALYETELADARRALDDTARERAKLQI	K	A	L	A	R	R	3	1	0	1	0	0	2	0	0	0	2	0	0	0	0	0	1	0	1	0	0	0	11	0	1250.61	P20700	P20700	80	90	LMNB1	Lamin-B1	yes	yes	2	0.0097718	53.683
AMEIASQR	DPSITHENMDAYLSKAMEIASQRTKEERSS	MDAYLSKAMEIASQRTKEERSSQDHVDEEV	K	A	M	Q	R	T	2	1	0	0	0	1	1	0	0	1	0	0	1	0	0	1	0	0	0	0	0	0	8	0	904.444	Q9BRS2	Q9BRS2	402	409	RIOK1	Serine/threonine-protein kinase RIO1	yes	yes	2	0.0073697	111.82	By MS/MS		By MS/MS	By matching	By matching
AMGIMNSFVNDIFER	KVLKQVHPDTGISSKAMGIMNSFVNDIFER	AMGIMNSFVNDIFERIASEASRLAHYNKRS	K	A	M	E	R	I	1	1	2	1	0	0	1	1	0	2	0	0	2	2	0	1	0	0	0	1	0	0	15	0	1742.81	Q99880;Q99879;Q99877;Q93079;Q5QNW6;P62807;P58876;P57053;O60814;Q16778;P33778;P23527;P06899;Q8N257	Q99880	59	73	HIST1H2BL;HIST1H2BM;HIST1H2BN;HIST1H2BH;HIST2H2BF;HIST1H2BC;HIST1H2BD;H2BFS;HIST1H2BK;HIST2H2BE;HIST1H2BB;HIST1H2BO;HIST1H2BJ;HIST3H2BB	Histone H2B type 1-L;Histone H2B type 1-M;Histone H2B type 1-N;Histone H2B type 1-H;Histone H2B type 2-F;Histone H2B type 1-C/E/F/G/I;Histone H2B type 1-D;Histone H2B type F-S;Histone H2B type 1-K;Histone H2B type 2-E;Histone H2B type 1-B;Histone H2B type 1-O;Histone H2B type 1-J;Histone H2B type 3-B	no	no	2	6.7788e-33	156.51					By MS/MS
AMTAGTTTTFPMSNHTR	______________________________	TAGTTTTFPMSNHTRERVTVAKLTLENFYS	M	A	M	T	R	E	2	1	1	0	0	0	0	1	1	0	0	0	2	1	1	1	6	0	0	0	0	0	17	0	1823.83	Q9Y2H1	Q9Y2H1	2	18	STK38L	Serine/threonine-protein kinase 38-like	yes	yes	2	8.4926e-59	176.51	By MS/MS	By MS/MS	By MS/MS
AMTDLQNMLEAK	SEVDTLKQSCWDLERAMTDLQNMLEAKNAS	LERAMTDLQNMLEAKNASLASSNNDLQVAE	R	A	M	A	K	N	2	0	1	1	0	1	1	0	0	0	2	1	2	0	0	0	1	0	0	0	0	0	12	0	1363.65	Q08378	Q08378	483	494	GOLGA3	Golgin subfamily A member 3	yes	yes	2	5.1033e-09	120.68	By MS/MS	By MS/MS
AMTGSTPCSSMSNHTK	______________________________	MTGSTPCSSMSNHTKERVTMTKVTLENFYS	M	A	M	T	K	E	1	0	1	0	1	0	0	1	1	0	0	1	2	0	1	4	3	0	0	0	0	0	16	0	1695.7	Q15208	Q15208	2	17	STK38	Serine/threonine-protein kinase 38	yes	yes	2	1.0532e-42	156.69	By MS/MS	By MS/MS	By MS/MS
AMTGSTPCSSMSNHTKER	______________________________	GSTPCSSMSNHTKERVTMTKVTLENFYSNL	M	A	M	E	R	V	1	1	1	0	1	0	1	1	1	0	0	1	2	0	1	4	3	0	0	0	0	0	18	1	1980.85	Q15208	Q15208	2	19	STK38	Serine/threonine-protein kinase 38	yes	yes	3	2.2289e-31	136.2		By MS/MS
AMVYYMSTTIIAAVLGVILVLAIHPGNPK	LSGLDAKASGRLGTRAMVYYMSTTIIAAVL	LGVILVLAIHPGNPKLKKQLGPGKKNDEVS	R	A	M	P	K	L	4	0	1	0	0	0	0	2	1	4	3	1	2	0	2	1	2	0	2	4	0	0	29	0	3054.7	P43004	P43004	120	148	SLC1A2	Excitatory amino acid transporter 2	yes	yes	3;4	2.1166e-169	215.68	By MS/MS	By MS/MS	By MS/MS	By MS/MS	By MS/MS
ANACNSVIK	NVFDTELKGLSKIERANACNSVIKQLMKKE	LSKIERANACNSVIKQLMKKEFTLEFSRDR	R	A	N	I	K	Q	2	0	2	0	1	0	0	0	0	1	0	1	0	0	0	1	0	0	0	1	0	0	9	0	975.481	P16615	P16615	468	476	ATP2A2	Sarcoplasmic/endoplasmic reticulum calcium ATPase 2	yes	yes	2	0.047637	61.999	By matching	By matching		By matching
ANHFFTVTDPR	NIKEPRWDQSTFIGRANHFFTVTDPRNILL	FIGRANHFFTVTDPRNILLTNEQLESARKI	R	A	N	P	R	N	1	1	1	1	0	0	0	0	1	0	0	0	0	2	1	0	2	0	0	1	0	0	11	0	1303.63	Q9H9B4	Q9H9B4	25	35	SFXN1	Sideroflexin-1	yes	yes	3	0.041043	49.5	By MS/MS	By matching	By matching
ANITAIRR	TEKGISDLAQHYLMRANITAIRRVRKTDNN	AQHYLMRANITAIRRVRKTDNNRIARACGA	R	A	N	R	R	V	2	2	1	0	0	0	0	0	0	2	0	0	0	0	0	0	1	0	0	0	0	0	8	1	913.546	P49368	P49368	307	314	CCT3	T-complex protein 1 subunit gamma	yes	yes	3	0.032666	51.346		By MS/MS
ANNLSSLSK	EVLQRGEALSALDSKANNLSSLSKKYRQDA	SALDSKANNLSSLSKKYRQDAKYLNMHSTY	K	A	N	S	K	K	1	0	2	0	0	0	0	0	0	0	2	1	0	0	0	3	0	0	0	0	0	0	9	0	932.493	O75396	O75396	170	178	SEC22B	Vesicle-trafficking protein SEC22b	yes	yes	2	0.0049424	97.431	By matching	By matching	By MS/MS		By MS/MS
ANSSATETINK	DENARLQRVQYDLQKANSSATETINKLKVQ	DLQKANSSATETINKLKVQEQELTRLRIDY	K	A	N	N	K	L	2	0	2	0	0	0	1	0	0	1	0	1	0	0	0	2	2	0	0	0	0	0	11	0	1134.55	P15924	P15924	1517	1527	DSP	Desmoplakin	yes	yes	2	0.0022663	82.749				By matching
APGAGLGQDR	SSSWLTRRAIRPENRAPGAGLGQDRQVPLW	RPENRAPGAGLGQDRQVPLWGQLLLFLVFV	R	A	P	D	R	Q	2	1	0	1	0	1	0	3	0	0	1	0	0	0	1	0	0	0	0	0	0	0	10	0	940.473	P50402	P50402	212	221	EMD	Emerin	yes	yes	2	0.0050843	77.732	By MS/MS	By matching	By matching	By MS/MS
APGFGDNRK	VLNRLKVGLQVVAVKAPGFGDNRKNQLKDM	QVVAVKAPGFGDNRKNQLKDMAIATGGAVF	K	A	P	R	K	N	1	1	1	1	0	0	0	2	0	0	0	1	0	1	1	0	0	0	0	0	0	0	9	1	960.478	P10809	P10809	302	310	HSPD1	60 kDa heat shock protein, mitochondrial	yes	yes	2	0.040046	38.962	By matching	By MS/MS
APGMEPTMK	RDWRYHKEERVWITRAPGMEPTMKTNTYER	RVWITRAPGMEPTMKTNTYERGTYYFFDCL	R	A	P	M	K	T	1	0	0	0	0	0	1	1	0	0	0	1	2	0	2	0	1	0	0	0	0	0	9	0	960.441	Q9NZN8	Q9NZN8	482	490	CNOT2	CCR4-NOT transcription complex subunit 2	yes	yes	2	0.018328	74.301		By MS/MS	By matching
APILIATDVASR	QPERDWVLNEFRSGKAPILIATDVASRGLD	SGKAPILIATDVASRGLDVEDVKFVINYDY	K	A	P	S	R	G	3	1	0	1	0	0	0	0	0	2	1	0	0	0	1	1	1	0	0	1	0	0	12	0	1225.7	Q92841;P17844	Q92841	469	480	DDX17;DDX5	Probable ATP-dependent RNA helicase DDX17;Probable ATP-dependent RNA helicase DDX5	yes	no	2	0.00095279	90.15	By MS/MS	By matching	By MS/MS	By MS/MS
APSTYGGGLSVSSR	GSSRISSVLAGGSCRAPSTYGGGLSVSSRF	RAPSTYGGGLSVSSRFSSGGACGLGGGYGG	R	A	P	S	R	F	1	1	0	0	0	0	0	3	0	0	1	0	0	0	1	4	1	0	1	1	0	0	14	0	1337.66	CON__P08779;P08779	CON__P08779	42	55	KRT16	Keratin, type I cytoskeletal 16	yes	no	2	2.654e-13	119.45				By MS/MS
APSTYGGGLSVSSSR	GSSRISSVLAGGSCRAPSTYGGGLSVSSSR	APSTYGGGLSVSSSRFSSGGAYGLGGGYGG	R	A	P	S	R	F	1	1	0	0	0	0	0	3	0	0	1	0	0	0	1	5	1	0	1	1	0	0	15	0	1424.69	CON__P02533;P02533	CON__P02533	42	56	KRT14	Keratin, type I cytoskeletal 14	yes	no	2	1.1442e-27	154.67			By MS/MS	By MS/MS	By matching
APTIVGK	GQHTLIVADTENLLKAPTIVGKSSLNPILF	ADTENLLKAPTIVGKSSLNPILFRGVGMVA	K	A	P	G	K	S	1	0	0	0	0	0	0	1	0	1	0	1	0	0	1	0	1	0	0	1	0	0	7	0	684.417	P39656	P39656	183	189	DDOST	Dolichyl-diphosphooligosaccharide--protein glycosyltransferase 48 kDa subunit	yes	yes	2	0.034969	94.163	By matching		By matching	By MS/MS
APVLSDSSCK	KSSGSSYPSLLQCLKAPVLSDSSCKSSYPG	LQCLKAPVLSDSSCKSSYPGQITGNMICVG	K	A	P	C	K	S	1	0	0	1	1	0	0	0	0	0	1	1	0	0	1	3	0	0	0	1	0	0	10	0	1062.5	CON__P00761	CON__P00761	148	157			yes	yes	2	1.582e-13	164.57	By MS/MS	By MS/MS	By MS/MS	By MS/MS	By MS/MS
APVPGTPDSLSSGSSR	SMVAQAMGVYGALTKAPVPGTPDSLSSGSS	PVPGTPDSLSSGSSRDVQGTDASLDEELDR	K	A	P	S	R	D	1	1	0	1	0	0	0	2	0	0	1	0	0	0	3	5	1	0	0	1	0	0	16	0	1513.74	Q9UJZ1	Q9UJZ1	322	337	STOML2	Stomatin-like protein 2, mitochondrial	yes	yes	2	2.7374e-07	99.215	By MS/MS	By matching	By matching
APVPTGEVYFADSFDR	PDTTAPPSSPKVTYKAPVPTGEVYFADSFD	PVPTGEVYFADSFDRGTLSGWILSKAKKDD	K	A	P	D	R	G	2	1	0	2	0	0	1	1	0	0	0	0	0	2	2	1	1	0	1	2	0	0	16	0	1769.83	P27824	P27824	62	77	CANX	Calnexin	yes	yes	2	1.9566e-28	130.01			By MS/MS	By MS/MS	By matching
AQAAAPASVPAQAPK	RPKAKAKAKAKDQTKAQAAAPASVPAQAPK	AQAAAPASVPAQAPKRTQAPTKASE_____	K	A	Q	P	K	R	7	0	0	0	0	2	0	0	0	0	0	1	0	0	3	1	0	0	0	1	0	0	15	0	1376.74	P47914	P47914	135	149	RPL29	60S ribosomal protein L29	yes	yes	2	1.7401e-12	114.86		By matching
AQAAAPASVPAQAPKR	RPKAKAKAKAKDQTKAQAAAPASVPAQAPK	QAAAPASVPAQAPKRTQAPTKASE______	K	A	Q	K	R	T	7	1	0	0	0	2	0	0	0	0	0	1	0	0	3	1	0	0	0	1	0	0	16	1	1532.84	P47914	P47914	135	150	RPL29	60S ribosomal protein L29	yes	yes	3	0.0023253	59.862		By MS/MS
AQAELVGTADEATR	LDMLDLGAAKANLEKAQAELVGTADEATRA	KAQAELVGTADEATRAEIQIRIEANEALVK	K	A	Q	T	R	A	4	1	0	1	0	1	2	1	0	0	1	0	0	0	0	0	2	0	0	1	0	0	14	0	1430.7	P30049	P30049	137	150	ATP5D	ATP synthase subunit delta, mitochondrial	yes	yes	2	4.3113e-39	174.84	By MS/MS	By matching		By MS/MS
AQAELVGTADEATRAEIQIR	LDMLDLGAAKANLEKAQAELVGTADEATRA	VGTADEATRAEIQIRIEANEALVKALE___	K	A	Q	I	R	I	5	2	0	1	0	2	3	1	0	2	1	0	0	0	0	0	2	0	0	1	0	0	20	1	2141.11	P30049	P30049	137	156	ATP5D	ATP synthase subunit delta, mitochondrial	yes	yes	3	6.3797e-07	86.727	By MS/MS	By matching	By matching
AQAVSEDAGGNEGR	EAPGEQARDERSDSRAQAVSEDAGGNEGRA	RAQAVSEDAGGNEGRAAEAEPRALENGDAD	R	A	Q	G	R	A	3	1	1	1	0	1	2	3	0	0	0	0	0	0	0	1	0	0	0	1	0	0	14	0	1359.6	P55884	P55884	121	134	EIF3B	Eukaryotic translation initiation factor 3 subunit B	yes	yes	2	0.00091653	76.655		By MS/MS	By matching
AQCPIVER	LPHSAGRYAAKRFRKAQCPIVERLTNSMMM	AAKRFRKAQCPIVERLTNSMMMHGRNNGKK	K	A	Q	E	R	L	1	1	0	0	1	1	1	0	0	1	0	0	0	0	1	0	0	0	0	1	0	0	8	0	971.486	P46782	P46782	64	71	RPS5	40S ribosomal protein S5;40S ribosomal protein S5, N-terminally processed	yes	yes	2	0.0060468	113.89	By MS/MS	By MS/MS	By MS/MS		By matching
AQFEGIVTDLIR	MDSSGPKHLNMKLTRAQFEGIVTDLIRRTI	LTRAQFEGIVTDLIRRTIAPCQKAMQDAEV	R	A	Q	I	R	R	1	1	0	1	0	1	1	1	0	2	1	0	0	1	0	0	1	0	0	1	0	0	12	0	1360.74	P38646	P38646	349	360	HSPA9	Stress-70 protein, mitochondrial	yes	yes	2	1.5891e-06	107.24		By matching		By matching
AQFVPLPVSVSVEFAVAATDCIAK	AESNGSYLQLVEISRAQFVPLPVSVSVEFA	VSVEFAVAATDCIAKEVVDPTKCNLLAEKQ	R	A	Q	A	K	E	5	0	0	1	1	1	1	0	0	1	1	1	0	2	2	2	1	0	0	5	0	0	24	0	2518.31	CON__P12763	CON__P12763	188	211			yes	yes	3	1.6589e-10	89.873	By MS/MS			By MS/MS
AQGGSSDSSLALHER	LAAKEAADAELGQLRAQGGSSDSSLALHER	AQGGSSDSSLALHERIQALEAELQAVSHSK	R	A	Q	E	R	I	2	1	0	1	0	1	1	2	1	0	2	0	0	0	0	4	0	0	0	0	0	0	15	0	1513.71	Q08378	Q08378	1029	1043	GOLGA3	Golgin subfamily A member 3	yes	yes	2	2.6356e-05	97.463		By MS/MS	By matching
AQIHDLVLVGGSTR	LEPVEKALRDAKLDKAQIHDLVLVGGSTRI	KAQIHDLVLVGGSTRIPKVQKLLQDFFNGR	K	A	Q	T	R	I	1	1	0	1	0	1	0	2	1	1	2	0	0	0	0	1	1	0	0	2	0	0	14	0	1464.8	P0DMV9;P0DMV8	P0DMV9	329	342	HSPA1B;HSPA1A	Heat shock 70 kDa protein 1B;Heat shock 70 kDa protein 1A	yes	no	2;3	0.018466	61.435	By matching	By matching	By matching	By matching
AQIPSYSR	AEDEYAREEELASMRAQIPSYSRFYESGSS	EELASMRAQIPSYSRFYESGSSLRAENQST	R	A	Q	S	R	F	1	1	0	0	0	1	0	0	0	1	0	0	0	0	1	2	0	0	1	0	0	0	8	0	920.472	Q7Z353	Q7Z353	318	325	HDX	Highly divergent homeobox	yes	yes	2	0.0091464	108.09		By MS/MS		By matching
AQIWDTAGQER	EFATRSIQVDGKTIKAQIWDTAGQERYRAI	KTIKAQIWDTAGQERYRAITSAYYRGAVGA	K	A	Q	E	R	Y	2	1	0	1	0	2	1	1	0	1	0	0	0	0	0	0	1	1	0	0	0	0	11	0	1273.61	P62491;Q15907	P62491	62	72	RAB11A;RAB11B	Ras-related protein Rab-11A;Ras-related protein Rab-11B	yes	no	2	6.8954e-06	105.52		By MS/MS		By matching
AQLQLLQK	SQEIAQFQAELAEARAQLQLLQKQLDEQLS	AELAEARAQLQLLQKQLDEQLSKQPVGNQE	R	A	Q	Q	K	Q	1	0	0	0	0	3	0	0	0	0	3	1	0	0	0	0	0	0	0	0	0	0	8	0	940.571	Q08378	Q08378	1263	1270	GOLGA3	Golgin subfamily A member 3	yes	yes	2	0.048541	73.039
AQNLKDLAGR	______________________________	______________________________	M	A	Q	G	R	L	2	1	1	1	0	1	0	1	0	0	2	1	0	0	0	0	0	0	0	0	0	0	10	1	1084.6	Q99623	Q99623	2	11	PHB2	Prohibitin-2	yes	yes	2	0.0084122	55.235		By MS/MS
AQNLKDLAGRLPAGPR	______________________________	QNLKDLAGRLPAGPRGMGTALKLLLGAGAV	M	A	Q	P	R	G	3	2	1	1	0	1	0	2	0	0	3	1	0	0	2	0	0	0	0	0	0	0	16	2	1675.95	Q99623	Q99623	2	17	PHB2	Prohibitin-2	yes	yes	3	2.9271e-29	128.9	By MS/MS	By MS/MS
AQQEFAAGVFSNPAVR	RIHSLYRRTGASFQKAQQEFAAGVFSNPAV	QQEFAAGVFSNPAVRTAAANAAAGAAENAF	K	A	Q	V	R	T	4	1	1	0	0	2	1	1	0	0	0	0	0	2	1	1	0	0	0	2	0	0	16	0	1690.84	O14828	O14828	314	329	SCAMP3	Secretory carrier-associated membrane protein 3	yes	yes	2	0.013786	53.528	By MS/MS
AQQVAVQEQEIAR	QQIEEQRVQVQVVERAQQVAVQEQEIARRE	ERAQQVAVQEQEIARREKELEARVRKPAEA	R	A	Q	A	R	R	3	1	0	0	0	4	2	0	0	1	0	0	0	0	0	0	0	0	0	2	0	0	13	0	1468.76	O75955	O75955	262	274	FLOT1	Flotillin-1	yes	yes	2	0.0029555	72.643				By MS/MS
AQTVQNVTLSLTLPITCHICLGK	______________________________	LSLTLPITCHICLGKVRQPVICINNHVFCS	M	A	Q	G	K	V	1	0	1	0	2	2	0	1	1	2	4	1	0	0	1	1	4	0	0	2	0	0	23	0	2566.36	Q5W0B1	Q5W0B1	2	24	RNF219	RING finger protein 219	yes	yes	3	4.9066e-27	113.26	By matching	By matching	By matching	By MS/MS
AQVQLDSDHLEEDIHR	IRELRATLEMVNHEKAQVQLDSDHLEEDIH	QVQLDSDHLEEDIHRLKERFEEEARLRDDT	K	A	Q	H	R	L	1	1	0	3	0	2	2	0	2	1	2	0	0	0	0	1	0	0	0	1	0	0	16	0	1903.9	P07197	P07197	169	184	NEFM	Neurofilament medium polypeptide	yes	yes	3	9.7469e-06	83.386
AQVSLLIR	SVVAKFNASQLITQRAQVSLLIRRELTERA	SQLITQRAQVSLLIRRELTERAKDFSLILD	R	A	Q	I	R	R	1	1	0	0	0	1	0	0	0	1	2	0	0	0	0	1	0	0	0	1	0	0	8	0	898.56	Q99623	Q99623	158	165	PHB2	Prohibitin-2	yes	yes	2	0.043011	76.035	By MS/MS	By MS/MS		By matching	By matching
AQYEDIAQK	NNRSLDLDSIIAEVKAQYEDIAQKSKAEAE	IIAEVKAQYEDIAQKSKAEAESLYQSKYEE	K	A	Q	Q	K	S	2	0	0	1	0	2	1	0	0	1	0	1	0	0	0	0	0	0	1	0	0	0	9	0	1064.51	P04264	P04264	356	364	KRT1	Keratin, type II cytoskeletal 1	yes	yes	2	3.694e-06	153.04	By MS/MS	By MS/MS	By MS/MS	By MS/MS	By MS/MS
AQYEEIANR	NNRNLDLDSIIAEVKAQYEEIANRSRTEAE	IIAEVKAQYEEIANRSRTEAESWYQTKYEE	K	A	Q	N	R	S	2	1	1	0	0	1	2	0	0	1	0	0	0	0	0	0	0	0	1	0	0	0	9	0	1092.52	CON__P13647;P13647	CON__P13647	344	352	KRT5	Keratin, type II cytoskeletal 5	yes	no	2	2.0862e-36	199.29		By MS/MS	By MS/MS	By MS/MS	By MS/MS
AQYEEIAQR	NSRNLDLDSIIAEVKAQYEEIAQRSKEEAE	IIAEVKAQYEEIAQRSKEEAEALYHSKYEE	K	A	Q	Q	R	S	2	1	0	0	0	2	2	0	0	1	0	0	0	0	0	0	0	0	1	0	0	0	9	0	1106.54	CON__P02538;P02538;CON__P04259;CON__P48668;P48668;P04259;CON__P35908v2;P35908;CON__P35908	CON__P35908v2	354	362	KRT6A;KRT6C;KRT6B;KRT2	Keratin, type II cytoskeletal 6A;Keratin, type II cytoskeletal 6C;Keratin, type II cytoskeletal 6B;Keratin, type II cytoskeletal 2 epidermal	no	no	2	1.8725e-12	167.24	By matching	By MS/MS	By MS/MS	By MS/MS	By matching
ARFEELCSDLFR	DSLFEGIDFYTSITRARFEELCSDLFRSTL	ITRARFEELCSDLFRSTLEPVEKALRDAKL	R	A	R	F	R	S	1	2	0	1	1	0	2	0	0	0	2	0	0	2	0	1	0	0	0	0	0	0	12	1	1541.73	P0DMV9;P0DMV8;P17066;P48741	P0DMV9	300	311	HSPA1B;HSPA1A;HSPA6;HSPA7	Heat shock 70 kDa protein 1B;Heat shock 70 kDa protein 1A;Heat shock 70 kDa protein 6;Putative heat shock 70 kDa protein 7	no	no	3	3.6223e-09	125.54	By MS/MS	By MS/MS		By matching
ARFEELNADLFR	DSLYEGIDFYTSITRARFEELNADLFRGTL	ITRARFEELNADLFRGTLDPVEKALRDAKL	R	A	R	F	R	G	2	2	1	1	0	0	2	0	0	0	2	0	0	2	0	0	0	0	0	0	0	0	12	1	1479.75	P11142;P54652	P11142	300	311	HSPA8;HSPA2	Heat shock cognate 71 kDa protein;Heat shock-related 70 kDa protein 2	yes	no	3	1.6897e-18	156.36	By MS/MS	By MS/MS	By MS/MS	By MS/MS
ASESSKPWPDATYGTGSASR	AKEQTFSGGTSQDTKASESSKPWPDATYGT	KPWPDATYGTGSASRASAVSELSPRERSPA	K	A	S	S	R	A	3	1	0	1	0	0	1	2	0	0	0	1	0	0	2	5	2	1	1	0	0	0	20	1	2053.93	Q9Y2W1	Q9Y2W1	216	235	THRAP3	Thyroid hormone receptor-associated protein 3	yes	yes	3	4.3558e-15	106.49	By matching	By MS/MS	By matching	By MS/MS
ASGNYATVISHNPETK	CCLEEKPGDRGKLARASGNYATVISHNPET	SGNYATVISHNPETKKTRVKLPSGSKKVIS	R	A	S	T	K	K	2	0	2	0	0	0	1	1	1	1	0	1	0	0	1	2	2	0	1	1	0	0	16	0	1687.82	P62917	P62917	129	144	RPL8	60S ribosomal protein L8	yes	yes	3	4.2057e-06	84.842		By matching
ASGNYATVISHNPETKK	CCLEEKPGDRGKLARASGNYATVISHNPET	GNYATVISHNPETKKTRVKLPSGSKKVISS	R	A	S	K	K	T	2	0	2	0	0	0	1	1	1	1	0	2	0	0	1	2	2	0	1	1	0	0	17	1	1815.91	P62917	P62917	129	145	RPL8	60S ribosomal protein L8	yes	yes	4	0.0095334	46.621		By matching
ASGQAFELILSPR	______________________________	KRASGQAFELILSPRSKESVPEFPLSPPKK	R	A	S	P	R	S	2	1	0	0	0	1	1	1	0	1	2	0	0	1	1	2	0	0	0	0	0	0	13	0	1387.75	P16949	P16949	15	27	STMN1	Stathmin	yes	yes	2	6.2926e-05	99.522		By matching	By matching		By matching
ASGVAVSDGVIK	______________________________	______________________________	M	A	S	I	K	V	2	0	0	1	0	0	0	2	0	1	0	1	0	0	0	2	0	0	0	3	0	0	12	0	1101.6	P23528	P23528	2	13	CFL1	Cofilin-1	yes	yes	2	3.6982e-09	111.06	By MS/MS	By MS/MS	By matching	By MS/MS	By matching
ASITPGTILIILTGR	SHGKKPFSQHVRKLRASITPGTILIILTGR	ASITPGTILIILTGRHRGKRVVFLKQLASG	R	A	S	G	R	H	1	1	0	0	0	0	0	2	0	4	2	0	0	0	1	1	3	0	0	0	0	0	15	0	1524.92	Q02878	Q02878	142	156	RPL6	60S ribosomal protein L6	yes	yes	2	0.00038492	86.814		By matching
ASLEGNLAETENR	MQALEIELQSQLSMKASLEGNLAETENRYC	MKASLEGNLAETENRYCVQLSQIQGLIGSV	K	A	S	N	R	Y	2	1	2	0	0	0	3	1	0	0	2	0	0	0	0	1	1	0	0	0	0	0	13	0	1402.67	CON__Q04695;Q04695	CON__Q04695	322	334	KRT17	Keratin, type I cytoskeletal 17	yes	no	2	2.9398e-07	79.693
ASLENSLEETK	MQNLEIELQSQLSMKASLENSLEETKGRYC	LSMKASLENSLEETKGRYCMQLAQIQEMIG	K	A	S	T	K	G	1	0	1	0	0	0	3	0	0	0	2	1	0	0	0	2	1	0	0	0	0	0	11	0	1219.59	CON__P02533;P02533;CON__P08779;P08779;CON__Q9Z2K1;CON__Q3ZAW8	CON__P02533	353	363	KRT14;KRT16	Keratin, type I cytoskeletal 14;Keratin, type I cytoskeletal 16	no	no	2	5.0564e-08	116.52			By matching	By MS/MS	By MS/MS
ASLENSLEETKGR	MQNLEIELQSQLSMKASLENSLEETKGRYC	MKASLENSLEETKGRYCMQLAQIQEMIGSV	K	A	S	G	R	Y	1	1	1	0	0	0	3	1	0	0	2	1	0	0	0	2	1	0	0	0	0	0	13	1	1432.72	CON__P02533;P02533;CON__P08779;P08779;CON__Q9Z2K1;CON__Q3ZAW8	CON__P02533	353	365	KRT14;KRT16	Keratin, type I cytoskeletal 14;Keratin, type I cytoskeletal 16	no	no	2;3	1.6584e-30	171.62		By MS/MS		By MS/MS	By matching
ASLSLAPVNIFK	______________________________	______________________________	M	A	S	F	K	A	2	0	1	0	0	0	0	0	0	1	2	1	0	1	1	2	0	0	0	1	0	0	12	0	1258.73	P78371	P78371	2	13	CCT2	T-complex protein 1 subunit beta	yes	yes	2	0.00013125	92.051	By matching	By MS/MS
ASNVTNK	______________________________	______________________________	M	A	S	N	K	T	1	0	2	0	0	0	0	0	0	0	0	1	0	0	0	1	1	0	0	1	0	0	7	0	732.377	P07910;P0DMR1;O60812;B7ZW38;B2RXH8	P07910	2	8	HNRNPC;HNRNPCL4;HNRNPCL1;HNRNPCL3;HNRNPCL2	Heterogeneous nuclear ribonucleoproteins C1/C2;Heterogeneous nuclear ribonucleoprotein C-like 4;Heterogeneous nuclear ribonucleoprotein C-like 1;Heterogeneous nuclear ribonucleoprotein C-like 3;Heterogeneous nuclear ribonucleoprotein C-like 2	yes	no	2	0.052344	49.933	By matching		By MS/MS	By matching	By matching
ASNVTNKTDPR	______________________________	______________________________	M	A	S	P	R	S	1	1	2	1	0	0	0	0	0	0	0	1	0	0	1	1	2	0	0	1	0	0	11	1	1201.61	P07910	P07910	2	12	HNRNPC	Heterogeneous nuclear ribonucleoproteins C1/C2	yes	yes	2	2.868e-11	132.85	By MS/MS	By MS/MS
ASQAEISSLQSVR	QQVQLERTTLTSKLKASQAEISSLQSVRQW	LKASQAEISSLQSVRQWYQQQLALAQEARV	K	A	S	V	R	Q	2	1	0	0	0	2	1	0	0	1	1	0	0	0	0	4	0	0	0	1	0	0	13	0	1374.71	Q08378	Q08378	563	575	GOLGA3	Golgin subfamily A member 3	yes	yes	2	4.4098e-11	114.86	By MS/MS	By MS/MS	By MS/MS	By MS/MS	By MS/MS
ASSAKEIVLLSIR				A	S	I	R		2	1	0	0	0	0	1	0	0	2	2	1	0	0	0	3	0	0	0	1	0	0	13	1	1385.82		REV__C9JDV5					yes	yes	2	0.0033539	83.869				By matching	By matching
ASSVGNVADSTEPTKR	______________________________	SSVGNVADSTEPTKRMLSFQGLAELAHREY	M	A	S	K	R	M	2	1	1	1	0	0	1	1	0	0	0	1	0	0	1	3	2	0	0	2	0	0	16	1	1617.8	O15294	O15294	2	17	OGT	UDP-N-acetylglucosamine--peptide N-acetylglucosaminyltransferase 110 kDa subunit	yes	yes	2	4.7023e-124	227.57	By MS/MS	By MS/MS	By MS/MS	By MS/MS
ASTLAMTK	TLDPELMLNPENLPRASTLAMTKEYSFLRT	NPENLPRASTLAMTKEYSFLRTSVPRGPKV	R	A	S	T	K	E	2	0	0	0	0	0	0	0	0	0	1	1	1	0	0	1	2	0	0	0	0	0	8	0	821.432	Q08378	Q08378	201	208	GOLGA3	Golgin subfamily A member 3	yes	yes	2	0.029097	87.181	By matching	By MS/MS	By matching	By matching	By matching
ASTSTTIR	______________________________	______________________________	M	A	S	I	R	S	1	1	0	0	0	0	0	0	0	1	0	0	0	0	0	2	3	0	0	0	0	0	8	0	835.44	CON__P02538;P02538;CON__P04259;CON__P48668;P48668;P04259	CON__P04259	2	9	KRT6A;KRT6C;KRT6B	Keratin, type II cytoskeletal 6A;Keratin, type II cytoskeletal 6C;Keratin, type II cytoskeletal 6B	no	no	2	0.011303	72.492	By matching	By MS/MS	By MS/MS	By MS/MS	By matching
ATAGDTHLGGEDFDNR	DVSILTIDDGIFEVKATAGDTHLGGEDFDN	TAGDTHLGGEDFDNRLVNHFVEEFKRKHKK	K	A	T	N	R	L	2	1	1	3	0	0	1	3	1	0	1	0	0	1	0	0	2	0	0	0	0	0	16	0	1674.72	P0DMV9;P0DMV8;P17066;P48741	P0DMV9	221	236	HSPA1B;HSPA1A;HSPA6;HSPA7	Heat shock 70 kDa protein 1B;Heat shock 70 kDa protein 1A;Heat shock 70 kDa protein 6;Putative heat shock 70 kDa protein 7	no	no	3	5.9103e-09	101.39		By matching	By MS/MS
ATAPQTQHVSPMR	EARLNVLEKSSPGHRATAPQTQHVSPMRQV	HRATAPQTQHVSPMRQVEPPAKKPATPAED	R	A	T	M	R	Q	2	1	0	0	0	2	0	0	1	0	0	0	1	0	2	1	2	0	0	1	0	0	13	0	1422.7	P29692	P29692	124	136	EEF1D	Elongation factor 1-delta	yes	yes	3	8.9002e-12	113.99	By matching	By MS/MS	By matching	By matching
ATAVMPDGQFK	SSGNAKIGHPAPNFKATAVMPDGQFKDISL	PNFKATAVMPDGQFKDISLSDYKGKYVVFF	K	A	T	F	K	D	2	0	0	1	0	1	0	1	0	0	0	1	1	1	1	0	1	0	0	1	0	0	11	0	1163.56	Q06830	Q06830	17	27	PRDX1	Peroxiredoxin-1	yes	yes	2	1.4745e-08	133.57	By MS/MS	By MS/MS	By MS/MS	By MS/MS	By MS/MS
ATAVMPDGQFKDISLSDYK	SSGNAKIGHPAPNFKATAVMPDGQFKDISL	MPDGQFKDISLSDYKGKYVVFFFYPLDFTF	K	A	T	Y	K	G	2	0	0	3	0	1	0	1	0	1	1	2	1	1	1	2	1	0	1	1	0	0	19	1	2085.01	Q06830	Q06830	17	35	PRDX1	Peroxiredoxin-1	yes	yes	3	2.6644e-06	85.808	By matching	By MS/MS
ATCAPQHGAPGPGPADASK	SLHETSSVFVDSLTKATCAPQHGAPGPGPA	PQHGAPGPGPADASKVVAKGLGLSKAYVGQ	K	A	T	S	K	V	5	0	0	1	1	1	0	3	1	0	0	1	0	0	4	1	1	0	0	0	0	0	19	0	1788.82	P21333	P21333	2541	2559	FLNA	Filamin-A	yes	yes	3	0.010002	52.19	By MS/MS	By matching		By MS/MS
ATEEKKPETEAAR	______________________________	______________________________	M	A	T	A	R	A	3	1	0	0	0	0	4	0	0	0	0	2	0	0	1	0	2	0	0	0	0	0	13	2	1458.73	P61964	P61964	2	14	WDR5	WD repeat-containing protein 5	yes	yes	3	0.00020195	76.588	By MS/MS	By MS/MS	By MS/MS	By matching
ATENDIYNFFSPLNPVR	STTGHCVHMRGLPYRATENDIYNFFSPLNP	ENDIYNFFSPLNPVRVHIEIGPDGRVTGEA	R	A	T	V	R	V	1	1	3	1	0	0	1	0	0	1	1	0	0	2	2	1	1	0	1	1	0	0	17	0	1995.97	P31943;P52597	P31943	300	316	HNRNPH1;HNRNPF	Heterogeneous nuclear ribonucleoprotein H;Heterogeneous nuclear ribonucleoprotein H, N-terminally processed;Heterogeneous nuclear ribonucleoprotein F;Heterogeneous nuclear ribonucleoprotein F, N-terminally processed	no	no	2	1.5831e-91	204.49	By matching	By matching	By matching	By MS/MS	By MS/MS
ATEYIQYMR	SLQGEKASRAQILDKATEYIQYMRRKNHTH	AQILDKATEYIQYMRRKNHTHQQDIDDLKR	K	A	T	M	R	R	1	1	0	0	0	1	1	0	0	1	0	0	1	0	0	0	1	0	2	0	0	0	9	0	1173.55	P61244	P61244	67	75	MAX	Protein max	yes	yes	2	0.0085182	88.942		By matching
ATGGGLSSVGGGSSTIK	SGLGVGGGFSSSSGRATGGGLSSVGGGSST	GGGLSSVGGGSSTIKYTTTSSSSRKSYKH_	R	A	T	I	K	Y	1	0	0	0	0	0	0	6	0	1	1	1	0	0	0	4	2	0	0	1	0	0	17	0	1434.73	CON__P04259;P04259	CON__P04259	534	550	KRT6B	Keratin, type II cytoskeletal 6B	no	no	2	8.2676e-36	147.26
ATGHEFAVK	IGRGVSSVVRRCVHRATGHEFAVKIMEVTA	RRCVHRATGHEFAVKIMEVTAERLSPEQLE	R	A	T	V	K	I	2	0	0	0	0	0	1	1	1	0	0	1	0	1	0	0	1	0	0	1	0	0	9	0	958.487	P15735	P15735	45	53	PHKG2	Phosphorylase b kinase gamma catalytic chain, liver/testis isoform	yes	yes	2;3	0.00368	83.168	By MS/MS	By MS/MS	By matching	By MS/MS	By matching
ATILDLSCNK	DLNEVPVKELAALPKATILDLSCNKLTTLP	AALPKATILDLSCNKLTTLPSDFCGLTHLV	K	A	T	N	K	L	1	0	1	1	1	0	0	0	0	1	2	1	0	0	0	1	1	0	0	0	0	0	10	0	1133.58	Q96AG4	Q96AG4	41	50	LRRC59	Leucine-rich repeat-containing protein 59	yes	yes	2	4.1957e-05	126.41	By MS/MS	By MS/MS	By MS/MS	By MS/MS	By MS/MS
ATLEMVNHEK	AQLGDAYDQEIRELRATLEMVNHEKAQVQL	IRELRATLEMVNHEKAQVQLDSDHLEEDIH	R	A	T	E	K	A	1	0	1	0	0	0	2	0	1	0	1	1	1	0	0	0	1	0	0	1	0	0	10	0	1170.57	P07197	P07197	159	168	NEFM	Neurofilament medium polypeptide	yes	yes	3	0.033278	41.54	By matching	By matching		By matching
ATLSSIR	PATSYVRTTINKNARATLSSIRHMIRKNKY	TTINKNARATLSSIRHMIRKNKYRPDLRMA	R	A	T	I	R	H	1	1	0	0	0	0	0	0	0	1	1	0	0	0	0	2	1	0	0	0	0	0	7	0	746.429	P46779	P46779	88	94	RPL28	60S ribosomal protein L28	yes	yes	2	0.017133	108.24		By matching	By matching
ATMQNLNDR	SSFGGVDGLLAGGEKATMQNLNDRLASYLD	LAGGEKATMQNLNDRLASYLDKVRALEEAN	K	A	T	D	R	L	1	1	2	1	0	1	0	0	0	0	1	0	1	0	0	0	1	0	0	0	0	0	9	0	1061.49	CON__Q04695;Q04695;CON__Q9QWL7;CON__Q9C075;CON__Q99PS0;Q9C075	CON__Q04695	86	94	KRT17;KRT23	Keratin, type I cytoskeletal 17;Keratin, type I cytoskeletal 23	yes	no	2	0.0040941	101.64				By matching	By matching
ATNFLAHEK	______________________________	______________________________	M	A	T	E	K	I	2	0	1	0	0	0	1	0	1	0	1	1	0	1	0	0	1	0	0	0	0	0	9	0	1029.52	P29692	P29692	2	10	EEF1D	Elongation factor 1-delta	yes	yes	2	0.0039452	60.398	By matching	By MS/MS	By matching	By matching	By matching
ATPHPSELK	DAEEAAAEKRGLQRRATPHPSELKVMKRSI	RGLQRRATPHPSELKVMKRSIEGRRSEACP	R	A	T	L	K	V	1	0	0	0	0	0	1	0	1	0	1	1	0	0	2	1	1	0	0	0	0	0	9	0	978.513	Q14160	Q14160	474	482	SCRIB	Protein scribble homolog	yes	yes	2;3	0.003536	104.37
ATQQQHDFTLTQTADGR	EGSLSARWPVAGQIRATQQQHDFTLTQTAD	QQQHDFTLTQTADGRSSFDWLTGSSTDPLV	R	A	T	G	R	S	2	1	0	2	0	4	0	1	1	0	1	0	0	1	0	0	4	0	0	0	0	0	17	0	1916.9	P78527	P78527	2637	2653	PRKDC	DNA-dependent protein kinase catalytic subunit	yes	yes	3	0.0019722	70.584		By MS/MS	By MS/MS
ATSFLLALEPELEAR	AEVVLAHLGGGSTSRATSFLLALEPELEAR	ATSFLLALEPELEARLAHLGVQVKGEDEEE	R	A	T	A	R	L	3	1	0	0	0	0	3	0	0	0	4	0	0	1	1	1	1	0	0	0	0	0	15	0	1658.89	P04843	P04843	66	80	RPN1	Dolichyl-diphosphooligosaccharide--protein glycosyltransferase subunit 1	yes	yes	2	1.2228e-22	137.89	By MS/MS	By MS/MS	By MS/MS	By MS/MS	By matching
ATSVLPR	______________________________	MDGSRRVRATSVLPRYGPPCLFKGHLSTKS	R	A	T	P	R	Y	1	1	0	0	0	0	0	0	0	0	1	0	0	0	1	1	1	0	0	1	0	0	7	0	742.434	Q9P0W8	Q9P0W8	9	15	SPATA7	Spermatogenesis-associated protein 7	yes	yes	2	0.0044841	121.68		By MS/MS
ATTATMATSGSAR	______________________________	______________________________	M	A	T	A	R	K	4	1	0	0	0	0	0	1	0	0	0	0	1	0	0	2	4	0	0	0	0	0	13	0	1224.58	P38919	P38919	2	14	EIF4A3	Eukaryotic initiation factor 4A-III;Eukaryotic initiation factor 4A-III, N-terminally processed	yes	yes	2	1.1879e-23	125.75	By MS/MS	By MS/MS	By MS/MS	By MS/MS
ATVEQVLDPR	QKEADMYRIKDKADRATVEQVLDPRTRMIL	DKADRATVEQVLDPRTRMILFKMLTRGIIT	R	A	T	P	R	T	1	1	0	1	0	1	1	0	0	0	1	0	0	0	1	0	1	0	0	2	0	0	10	0	1126.6	Q9BRS2	Q9BRS2	156	165	RIOK1	Serine/threonine-protein kinase RIO1	yes	yes	2	0.00022735	105.2	By MS/MS	By MS/MS	By matching	By matching
ATVLESEGTR	KESMQMQVEAERRKRATVLESEGTRESAIN	ERRKRATVLESEGTRESAINVAEGKKQAQI	R	A	T	T	R	E	1	1	0	0	0	0	2	1	0	0	1	0	0	0	0	1	2	0	0	1	0	0	10	0	1061.54	Q9UJZ1	Q9UJZ1	202	211	STOML2	Stomatin-like protein 2, mitochondrial	yes	yes	2	0.023992	64.04	By matching	By matching	By matching
ATVQQLEGR	______________________________	______________________________	M	A	T	G	R	W	1	1	0	0	0	2	1	1	0	0	1	0	0	0	0	0	1	0	0	1	0	0	9	0	1000.53	Q01469	Q01469	2	10	FABP5	Fatty acid-binding protein, epidermal	yes	yes	2	0.00046304	111.95		By MS/MS		By MS/MS
ATVTATTKVPEIR	______________________________	______________________________	M	A	T	I	R	D	2	1	0	0	0	0	1	0	0	1	0	1	0	0	1	0	4	0	0	2	0	0	13	1	1385.79	Q9Y230	Q9Y230	2	14	RUVBL2	RuvB-like 2	yes	yes	2	5.6369e-09	110.39		By MS/MS
AVAAYLR	INLGNVLKEARIFDRAVAAYLRALSLSPNH	KEARIFDRAVAAYLRALSLSPNHAVVHGNL	R	A	V	L	R	A	3	1	0	0	0	0	0	0	0	0	1	0	0	0	0	0	0	0	1	1	0	0	7	0	762.439	O15294	O15294	244	250	OGT	UDP-N-acetylglucosamine--peptide N-acetylglucosaminyltransferase 110 kDa subunit	yes	yes	2	0.01836	105.42	By matching	By MS/MS		By matching	By matching
AVAEQVLHSQSR	LYRKLVAKDGSCLFRAVAEQVLHSQSRHVE	LFRAVAEQVLHSQSRHVEVRMACIHYLREN	R	A	V	S	R	H	2	1	0	0	0	2	1	0	1	0	1	0	0	0	0	2	0	0	0	2	0	0	12	0	1323.69	Q01804	Q01804	49	60	OTUD4	OTU domain-containing protein 4	yes	yes	2;3	1.4576e-60	207.29	By MS/MS	By MS/MS	By MS/MS	By MS/MS	By MS/MS
AVAGDASESALLK	AVFQANQENLPILKRAVAGDASESALLKCI	KRAVAGDASESALLKCIELCCGSVKEMRER	R	A	V	L	K	C	4	0	0	1	0	0	1	1	0	0	2	1	0	0	0	2	0	0	0	1	0	0	13	0	1230.65	P05023	P05023	446	458	ATP1A1	Sodium/potassium-transporting ATPase subunit alpha-1	yes	yes	2	3.588e-11	115.78	By MS/MS	By MS/MS	By MS/MS	By MS/MS	By MS/MS
AVAHHTDCTFIR	LLYGPPGTGKTLLARAVAHHTDCTFIRVSG	LARAVAHHTDCTFIRVSGSELVQKFIGEGA	R	A	V	I	R	V	2	1	0	1	1	0	0	0	2	1	0	0	0	1	0	0	2	0	0	1	0	0	12	0	1426.68	P62195	P62195	202	213	PSMC5	26S protease regulatory subunit 8	yes	yes	3	7.6854e-05	92.925	By matching	By MS/MS	By matching
AVAHHTTAAFIR	LMYGPPGCGKTMLAKAVAHHTTAAFIRVVG	LAKAVAHHTTAAFIRVVGSEFVQKYLGEGP	K	A	V	I	R	V	4	1	0	0	0	0	0	0	2	1	0	0	0	1	0	0	2	0	0	1	0	0	12	0	1293.69	P43686	P43686	218	229	PSMC4	26S protease regulatory subunit 6B	yes	yes	3	1.8676e-07	108.35	By MS/MS	By MS/MS	By matching	By MS/MS	By MS/MS
AVANQTSATFLR	ILYGPPGTGKTLLAKAVANQTSATFLRVVG	LAKAVANQTSATFLRVVGSELIQKYLGDGP	K	A	V	L	R	V	3	1	1	0	0	1	0	0	0	0	1	0	0	1	0	1	2	0	0	1	0	0	12	0	1277.67	P62191	P62191	238	249	PSMC1	26S protease regulatory subunit 4	yes	yes	2	8.5418e-09	123.6	By matching	By MS/MS	By matching	By MS/MS
AVAQALEVIPR	EKSKAMTGVEQWPYRAVAQALEVIPRTLIQ	WPYRAVAQALEVIPRTLIQNCGASTIRLLT	R	A	V	P	R	T	3	1	0	0	0	1	1	0	0	1	1	0	0	0	1	0	0	0	0	2	0	0	11	0	1165.68	P49368	P49368	439	449	CCT3	T-complex protein 1 subunit gamma	yes	yes	2	2.4046e-22	166.07	By MS/MS	By MS/MS	By MS/MS	By matching	By MS/MS
AVCMLSNTTAIAEAWAR	PPTVVPGGDLAKVQRAVCMLSNTTAIAEAW	CMLSNTTAIAEAWARLDHKFDLMYAKRAFV	R	A	V	A	R	L	5	1	1	0	1	0	1	0	0	1	1	0	1	0	0	1	2	1	0	1	0	0	17	0	1863.9	P68363;P68366;Q71U36;Q13748;Q6PEY2;Q9NY65	P68363	374	390	TUBA1B;TUBA4A;TUBA1A;TUBA3C;TUBA3E;TUBA8	Tubulin alpha-1B chain;Tubulin alpha-4A chain;Tubulin alpha-1A chain;Tubulin alpha-3C/D chain;Tubulin alpha-3E chain;Tubulin alpha-8 chain	no	no	2;3	4.1123e-85	172.92	By MS/MS	By MS/MS	By MS/MS	By matching	By matching
AVCMLSNTTAVAEAWAR	PPTVVPGGDLAKVQRAVCMLSNTTAVAEAW	CMLSNTTAVAEAWARLDHKFDLMYAKRAFV	R	A	V	A	R	L	5	1	1	0	1	0	1	0	0	0	1	0	1	0	0	1	2	1	0	2	0	0	17	0	1849.88	Q9BQE3	Q9BQE3	374	390	TUBA1C	Tubulin alpha-1C chain	yes	yes	2	9.3091e-28	105.17
AVDFAER	FRAHVKHRKGAARLRAVDFAERHGYIKGIV	RKGAARLRAVDFAERHGYIKGIVKDIIHDP	R	A	V	E	R	H	2	1	0	1	0	0	1	0	0	0	0	0	0	1	0	0	0	0	0	1	0	0	7	0	806.392	P62917	P62917	31	37	RPL8	60S ribosomal protein L8	yes	yes	2	0.018372	105.39		By MS/MS	By matching		By matching
AVDSLVPIGR	IPRISVREPMQTGIKAVDSLVPIGRGQREL	QTGIKAVDSLVPIGRGQRELIIGDRQTGKT	K	A	V	G	R	G	1	1	0	1	0	0	0	1	0	1	1	0	0	0	1	1	0	0	0	2	0	0	10	0	1025.59	P25705	P25705	195	204	ATP5A1	ATP synthase subunit alpha, mitochondrial	yes	yes	2	3.7694e-05	130.27	By MS/MS	By MS/MS	By MS/MS	By MS/MS	By MS/MS
AVENYLIQMAR	ARLSNLALVKPEKTKAVENYLIQMARYGQL	EKTKAVENYLIQMARYGQLSEKVSEQGLIE	K	A	V	A	R	Y	2	1	1	0	0	1	1	0	0	1	1	0	1	0	0	0	0	0	1	1	0	0	11	0	1306.67	O14737	O14737	69	79	PDCD5	Programmed cell death protein 5	yes	yes	2	1.8288e-06	94.302
AVFPSIVGR	SGMCKAGFAGDDAPRAVFPSIVGRPRHQGV	GDDAPRAVFPSIVGRPRHQGVMVGMGQKDS	R	A	V	G	R	P	1	1	0	0	0	0	0	1	0	1	0	0	0	1	1	1	0	0	0	2	0	0	9	0	944.544	P63267;P68133;P68032;P62736;P63261;P60709;Q6S8J3;A5A3E0;P0CG38	P63261	29	37	ACTG2;ACTA1;ACTC1;ACTA2;ACTG1;ACTB;POTEE;POTEF;POTEI	Actin, gamma-enteric smooth muscle;Actin, alpha skeletal muscle;Actin, alpha cardiac muscle 1;Actin, aortic smooth muscle;Actin, cytoplasmic 2;Actin, cytoplasmic 2, N-terminally processed;Actin, cytoplasmic 1;Actin, cytoplasmic 1, N-terminally processed;POTE ankyrin domain family member E;POTE ankyrin domain family member F;POTE ankyrin domain family member I	no	no	2	0.0051731	96.285	By matching	By MS/MS	By MS/MS
AVFPSIVGRPR	SGMCKAGFAGDDAPRAVFPSIVGRPRHQGV	DAPRAVFPSIVGRPRHQGVMVGMGQKDSYV	R	A	V	P	R	H	1	2	0	0	0	0	0	1	0	1	0	0	0	1	2	1	0	0	0	2	0	0	11	1	1197.7	P63267;P68133;P68032;P62736;P63261;P60709;Q6S8J3;A5A3E0;P0CG38	P63261	29	39	ACTG2;ACTA1;ACTC1;ACTA2;ACTG1;ACTB;POTEE;POTEF;POTEI	Actin, gamma-enteric smooth muscle;Actin, alpha skeletal muscle;Actin, alpha cardiac muscle 1;Actin, aortic smooth muscle;Actin, cytoplasmic 2;Actin, cytoplasmic 2, N-terminally processed;Actin, cytoplasmic 1;Actin, cytoplasmic 1, N-terminally processed;POTE ankyrin domain family member E;POTE ankyrin domain family member F;POTE ankyrin domain family member I	no	no	2;3	4.2399e-29	180.44	By MS/MS	By MS/MS	By MS/MS	By matching	By matching
AVFQANQENLPILK	ATWLALSRIAGLCNRAVFQANQENLPILKR	RAVFQANQENLPILKRAVAGDASESALLKC	R	A	V	L	K	R	2	0	2	0	0	2	1	0	0	1	2	1	0	1	1	0	0	0	0	1	0	0	14	0	1583.87	P05023	P05023	431	444	ATP1A1	Sodium/potassium-transporting ATPase subunit alpha-1	yes	yes	2	2.1358e-22	155	By MS/MS	By MS/MS	By MS/MS	By MS/MS	By MS/MS
AVFQANQENLPILKR	ATWLALSRIAGLCNRAVFQANQENLPILKR	AVFQANQENLPILKRAVAGDASESALLKCI	R	A	V	K	R	A	2	1	2	0	0	2	1	0	0	1	2	1	0	1	1	0	0	0	0	1	0	0	15	1	1739.97	P05023	P05023	431	445	ATP1A1	Sodium/potassium-transporting ATPase subunit alpha-1	yes	yes	3	3.9539e-13	112.42	By MS/MS	By matching	By matching
AVFVDLEPTVIDEVR	NTFFSETGAGKHVPRAVFVDLEPTVIDEVR	AVFVDLEPTVIDEVRTGTYRQLFHPEQLIT	R	A	V	V	R	T	1	1	0	2	0	0	2	0	0	1	1	0	0	1	1	0	1	0	0	4	0	0	15	0	1700.9	P68363;Q71U36;Q9BQE3	P68363	65	79	TUBA1B;TUBA1A;TUBA1C	Tubulin alpha-1B chain;Tubulin alpha-1A chain;Tubulin alpha-1C chain	no	no	2;3	2.0074e-110	226.4	By MS/MS	By MS/MS	By MS/MS	By MS/MS	By MS/MS
AVFVDLEPTVIDEVRTGTYR	NTFFSETGAGKHVPRAVFVDLEPTVIDEVR	LEPTVIDEVRTGTYRQLFHPEQLITGKEDA	R	A	V	Y	R	Q	1	2	0	2	0	0	2	1	0	1	1	0	0	1	1	0	3	0	1	4	0	0	20	1	2279.18	P68363;Q71U36;Q9BQE3	P68363	65	84	TUBA1B;TUBA1A;TUBA1C	Tubulin alpha-1B chain;Tubulin alpha-1A chain;Tubulin alpha-1C chain	no	no	3	7.124e-72	177.56		By MS/MS
AVGHPFVIQLGR	KQLGSILKTNVRACKAVGHPFVIQLGRIYL	ACKAVGHPFVIQLGRIYLDMLNVYKCLSEN	K	A	V	G	R	I	1	1	0	0	0	1	0	2	1	1	1	0	0	1	1	0	0	0	0	2	0	0	12	0	1292.74	O14980	O14980	701	712	XPO1	Exportin-1	yes	yes	3	0.0013349	54.471				By MS/MS
AVLGTSNFK	SSLHLKAFTYINLDKAVLGTSNFKVSASPL	YINLDKAVLGTSNFKVSASPLLYTLIEKTM	K	A	V	F	K	V	1	0	1	0	0	0	0	1	0	0	1	1	0	1	0	1	1	0	0	1	0	0	9	0	935.508	P02786	P02786	487	495	TFRC	Transferrin receptor protein 1;Transferrin receptor protein 1, serum form	yes	yes	2	0.015888	77.674
AVLIAGQPGTGK	GVVLEMIREGKIAGRAVLIAGQPGTGKTAI	AGRAVLIAGQPGTGKTAIAMGMAQALGPDT	R	A	V	G	K	T	2	0	0	0	0	1	0	3	0	1	1	1	0	0	1	0	1	0	0	1	0	0	12	0	1110.64	Q9Y230	Q9Y230	72	83	RUVBL2	RuvB-like 2	yes	yes	2	1.2193e-08	116.3	By MS/MS	By MS/MS	By MS/MS	By MS/MS
AVLLAGPPGTGK	GVIVELIKSKKMAGRAVLLAGPPGTGKTAL	AGRAVLLAGPPGTGKTALALAIAQELGSKV	R	A	V	G	K	T	2	0	0	0	0	0	0	3	0	0	2	1	0	0	2	0	1	0	0	1	0	0	12	0	1079.63	Q9Y265	Q9Y265	65	76	RUVBL1	RuvB-like 1	yes	yes	2	0.00014223	88.496	By MS/MS	By MS/MS		By MS/MS
AVLSCIAPSAK	YATLIENDSNPEVRRAVLSCIAPSAKTLPK	EVRRAVLSCIAPSAKTLPKIVGRTKDVKEA	R	A	V	A	K	T	3	0	0	0	1	0	0	0	0	1	1	1	0	0	1	2	0	0	0	1	0	0	11	0	1115.6	Q9BPX3	Q9BPX3	198	208	NCAPG	Condensin complex subunit 3	yes	yes	2	0.0024439	74.376	By matching	By MS/MS
AVLVDLEPGTMDSVR	NVYYNEATGGKYVPRAVLVDLEPGTMDSVR	AVLVDLEPGTMDSVRSGPFGQIFRPDNFVF	R	A	V	V	R	S	1	1	0	2	0	0	1	1	0	0	2	0	1	0	1	1	1	0	0	3	0	0	15	0	1600.81	P68371;Q3ZCM7;P04350	P68371	63	77	TUBB4B;TUBB8;TUBB4A	Tubulin beta-4B chain;Tubulin beta-8 chain;Tubulin beta-4A chain	no	no	2	2.9451e-33	161.99	By MS/MS	By MS/MS	By MS/MS	By MS/MS	By MS/MS
AVNPTPSSWSLDSGKEAK	GALPRSDPNLSAPEKAVNPTPSSWSLDSGK	PTPSSWSLDSGKEAKNMSDSGKLISPPVPP	K	A	V	A	K	N	2	0	1	1	0	0	1	1	0	0	1	2	0	0	2	4	1	1	0	1	0	0	18	1	1872.92	Q8N1I0	Q8N1I0	1760	1777	DOCK4	Dedicator of cytokinesis protein 4	yes	yes	3	0.022138	59.512		By MS/MS
AVPYPQR	VLSLSQSKVLPVPQKAVPYPQRDMPIQAFL	KVLPVPQKAVPYPQRDMPIQAFLLYQEPVL	K	A	V	Q	R	D	1	1	0	0	0	1	0	0	0	0	0	0	0	0	2	0	0	0	1	1	0	0	7	0	829.445	CON__P02666	CON__P02666	177	183			yes	yes	2	0.03255	95.378
AVQADQERER	KQCKQCANKVLQHMKAVQADQERERQRRLE	LQHMKAVQADQERERQRRLEVEREAEKKRE	K	A	V	E	R	Q	2	2	0	1	0	2	2	0	0	0	0	0	0	0	0	0	0	0	0	1	0	0	10	1	1200.58	Q96AG4	Q96AG4	150	159	LRRC59	Leucine-rich repeat-containing protein 59	yes	yes	2;3	7.5156e-14	135.86	By MS/MS	By MS/MS	By matching	By matching	By matching
AVQELVHPVVDR	AHPQLKQCVRQAIERAVQELVHPVVDRSIK	IERAVQELVHPVVDRSIKIAMTTCEQIVRK	R	A	V	D	R	S	1	1	0	1	0	1	1	0	1	0	1	0	0	0	1	0	0	0	0	4	0	0	12	0	1360.75	A5YKK6	A5YKK6	1400	1411	CNOT1	CCR4-NOT transcription complex subunit 1	yes	yes	3	0.00034888	76.165	By MS/MS	By MS/MS			By matching
AVTIFIR	TKDKMLVIEQCKNSRAVTIFIRGGNKMIIE	IEQCKNSRAVTIFIRGGNKMIIEEAKRSLH	R	A	V	I	R	G	1	1	0	0	0	0	0	0	0	2	0	0	0	1	0	0	1	0	0	1	0	0	7	0	818.501	P48643	P48643	382	388	CCT5	T-complex protein 1 subunit epsilon	yes	yes	2	0.004328	119.06	By matching	By MS/MS	By matching	By matching
AVVVVDDR	ELLEQAFSQFGPVEKAVVVVDDRGRATGKG	QFGPVEKAVVVVDDRGRATGKGFVEFAAKP	K	A	V	D	R	G	1	1	0	2	0	0	0	0	0	0	0	0	0	0	0	0	0	0	0	4	0	0	8	0	871.476	Q8WXF1	Q8WXF1	185	192	PSPC1	Paraspeckle component 1	yes	yes	2	0.0036861	140.98	By matching	By MS/MS	By MS/MS	By matching	By matching
AWGPGLEGGVVGK	FEVKVGTECGNQKVRAWGPGLEGGVVGKSA	VRAWGPGLEGGVVGKSADFVVEAIGDDVGT	R	A	W	G	K	S	1	0	0	0	0	0	1	5	0	0	1	1	0	0	1	0	0	1	0	2	0	0	13	0	1225.65	P21333	P21333	581	593	FLNA	Filamin-A	yes	yes	2	0.018303	61.353		By MS/MS
AYELEQNVVK	MAYRKNADRDEDKAKAYELEQNVVKLMRGL	EDKAKAYELEQNVVKLMRGLLQCMMRQVAK	K	A	Y	V	K	L	1	0	1	0	0	1	2	0	0	0	1	1	0	0	0	0	0	0	1	2	0	0	10	0	1191.61	P46019	P46019	74	83	PHKA2	Phosphorylase b kinase regulatory subunit alpha, liver isoform	yes	yes	2	0.029322	62.546
AYELEQSVVK	LAYRKNADRDEDKAKAYELEQSVVKLMRGL	EDKAKAYELEQSVVKLMRGLLHCMIRQVDK	K	A	Y	V	K	L	1	0	0	0	0	1	2	0	0	0	1	1	0	0	0	1	0	0	1	2	0	0	10	0	1164.6	P46020	P46020	74	83	PHKA1	Phosphorylase b kinase regulatory subunit alpha, skeletal muscle isoform	yes	yes	2	3.9256e-05	124.23	By MS/MS	By MS/MS	By MS/MS	By MS/MS	By MS/MS
AYENAVGILSR	SDLTSAQKEMKTKHKAYENAVGILSRRLQE	TKHKAYENAVGILSRRLQEALAAKEAADAE	K	A	Y	S	R	R	2	1	1	0	0	0	1	1	0	1	1	0	0	0	0	1	0	0	1	1	0	0	11	0	1191.62	Q08378	Q08378	998	1008	GOLGA3	Golgin subfamily A member 3	yes	yes	2	0.0018914	85.958	By MS/MS	By MS/MS	By MS/MS	By MS/MS
AYGENIGYSEK	FTNLTMDTEIRIECKAYGENIGYSEKDRFQ	IECKAYGENIGYSEKDRFQGRFDVKIEVKS	K	A	Y	E	K	D	1	0	1	0	0	0	2	2	0	1	0	1	0	0	0	1	0	0	2	0	0	0	11	0	1229.56	P05026	P05026	278	288	ATP1B1	Sodium/potassium-transporting ATPase subunit beta-1	yes	yes	2	0.0022267	76.465
AYHEQLSVAEITNACFEPANQMVK	HFPLATYAPVISAEKAYHEQLSVAEITNAC	EITNACFEPANQMVKCDPRHGKYMACCLLY	K	A	Y	V	K	C	4	0	2	0	1	2	3	0	1	1	1	1	1	1	1	1	1	0	1	2	0	0	24	0	2749.28	P68363;P68366;Q71U36;Q13748;Q6PEY2	P68363	281	304	TUBA1B;TUBA4A;TUBA1A;TUBA3C;TUBA3E	Tubulin alpha-1B chain;Tubulin alpha-4A chain;Tubulin alpha-1A chain;Tubulin alpha-3C/D chain;Tubulin alpha-3E chain	no	no	3	1.8967e-61	143.91	By MS/MS	By MS/MS	By MS/MS	By MS/MS
AYLQLGINEK	QVEPIQIWPQQELVKAYLQLGINEKLGLSG	QELVKAYLQLGINEKLGLSGRPDRPIGCLG	K	A	Y	E	K	L	1	0	1	0	0	1	1	1	0	1	2	1	0	0	0	0	0	0	1	0	0	0	10	0	1147.62	Q93100	Q93100	537	546	PHKB	Phosphorylase b kinase regulatory subunit beta	yes	yes	2	0.0019392	90.135	By matching	By MS/MS	By matching	By matching	By matching
AYRSHEFYKFCSLPEK	SAKFVLHAVQLVKQRAYRSHEFYKFCSLPE	YRSHEFYKFCSLPEKGTLTEAFPVLGGKAI	R	A	Y	E	K	G	1	1	0	0	1	0	2	0	1	0	1	2	0	2	1	2	0	0	2	0	0	0	16	2	2060.98	P29144	P29144	700	715	TPP2	Tripeptidyl-peptidase 2	yes	yes	2	0.0069783	50.108		By MS/MS
AYSEAHEISK	ATGEKRATVVESSEKAYSEAHEISKEHMQP	ESSEKAYSEAHEISKEHMQPTHPIRLGLAL	K	A	Y	S	K	E	2	0	0	0	0	0	2	0	1	1	0	1	0	0	0	2	0	0	1	0	0	0	10	0	1133.54	P61981	P61981	153	162	YWHAG	14-3-3 protein gamma;14-3-3 protein gamma, N-terminally processed	yes	yes	3	0.018674	47.559
AYVVLGQFLVLK	GEVLGKKLEERGFDKAYVVLGQFLVLKKDE	FDKAYVVLGQFLVLKKDEDLFREWLKDTCG	K	A	Y	L	K	K	1	0	0	0	0	1	0	1	0	0	3	1	0	1	0	0	0	0	1	3	0	0	12	0	1348.81	O75531	O75531	42	53	BANF1	Barrier-to-autointegration factor;Barrier-to-autointegration factor, N-terminally processed	yes	yes	2	1.3315e-08	114.89
CAGNEDIITLR	LAMGVNLTSMSKILKCAGNEDIITLRAEDN	KILKCAGNEDIITLRAEDNADTLALVFEAP	K	C	A	L	R	A	1	1	1	1	1	0	1	1	0	2	1	0	0	0	0	0	1	0	0	0	0	0	11	0	1260.61	P12004	P12004	81	91	PCNA	Proliferating cell nuclear antigen	yes	yes	2	2.9203e-08	125.56	By MS/MS	By matching	By MS/MS	By MS/MS
CCAADDKEACFAVEGPK	QLKTVMENFVAFVDKCCAADDKEACFAVEG	AADDKEACFAVEGPKLVVSTQTALA_____	K	C	C	P	K	L	4	0	0	2	3	0	2	1	0	0	0	2	0	1	1	0	0	0	0	1	0	0	17	1	1926.79	CON__P02769	CON__P02769	581	597			yes	yes	3	0.033509	41.695		By MS/MS
CCTESLVNR	CVLHEKTPVSEKVTKCCTESLVNRRPCFSA	SEKVTKCCTESLVNRRPCFSALTPDETYVP	K	C	C	N	R	R	0	1	1	0	2	0	1	0	0	0	1	0	0	0	0	1	1	0	0	1	0	0	9	0	1137.49	CON__P02768-1;P02768;CON__P02769	CON__P02769	499	507	ALB	Serum albumin	no	no	2	2.0211e-09	147.34		By MS/MS	By MS/MS		By MS/MS
CDFTEDQTAEFK	______________________________	______________________________	M	C	D	F	K	E	1	0	0	2	1	1	2	0	0	0	0	1	0	2	0	0	2	0	0	0	0	0	12	0	1489.6	P60660	P60660	2	13	MYL6	Myosin light polypeptide 6	yes	yes	2	6.4796e-05	96.113			By MS/MS	By MS/MS
CDSSPDSAEDVRK	HVLKQDGQFSVLFTKCDSSPDSAEDVRKLC	TKCDSSPDSAEDVRKLCPDCPLLAPLNDSR	K	C	D	R	K	L	1	1	0	3	1	0	1	0	0	0	0	1	0	0	1	3	0	0	0	1	0	0	13	1	1464.62	CON__P12763;P02765	CON__P12763	132	144	AHSG	Alpha-2-HS-glycoprotein;Alpha-2-HS-glycoprotein chain A;Alpha-2-HS-glycoprotein chain B	yes	no	3	7.9285e-08	106.32	By matching	By MS/MS	By MS/MS		By matching
CDVDIRK	ESCGIHETTFNSIMKCDVDIRKDLYANTVL	TTFNSIMKCDVDIRKDLYANTVLSGGTTMY	K	C	D	R	K	D	0	1	0	2	1	0	0	0	0	1	0	1	0	0	0	0	0	0	0	1	0	0	7	1	904.444	P63261;P60709;Q562R1	P63261	285	291	ACTG1;ACTB;ACTBL2	Actin, cytoplasmic 2;Actin, cytoplasmic 2, N-terminally processed;Actin, cytoplasmic 1;Actin, cytoplasmic 1, N-terminally processed;Beta-actin-like protein 2	yes	no	2;3	0.0083335	98.503	By matching	By MS/MS	By MS/MS	By matching	By matching
CEGSQPWNLTPR	RLTAEQALQHPFFERCEGSQPWNLTPRQRF	FERCEGSQPWNLTPRQRFRVAVWTVLAAGR	R	C	E	P	R	Q	0	1	1	0	1	1	1	1	0	0	1	0	0	0	2	1	1	1	0	0	0	0	12	0	1443.66	P15735	P15735	294	305	PHKG2	Phosphorylase b kinase gamma catalytic chain, liver/testis isoform	yes	yes	2	3.7244e-06	102.52
CEMEQQNQEYK	QEMIGSVEEQLAQLRCEMEQQNQEYKILLD	AQLRCEMEQQNQEYKILLDVKTRLEQEIAT	R	C	E	Y	K	I	0	0	1	0	1	3	3	0	0	0	0	1	1	0	0	0	0	0	1	0	0	0	11	0	1485.59	CON__P02533;P02533;CON__Q61782;CON__Q04695;Q04695;CON__Q9QWL7	CON__P02533	389	399	KRT14;KRT17	Keratin, type I cytoskeletal 14;Keratin, type I cytoskeletal 17	no	no	2	1.7919e-18	163.94					By MS/MS
CESAPGCGVWQRPVIDNPNYK	DMDGEWEAPQIANPRCESAPGCGVWQRPVI	CGVWQRPVIDNPNYKGKWKPPMIDNPSYQG	R	C	E	Y	K	G	1	1	2	1	2	1	1	2	0	1	0	1	0	0	3	1	0	1	1	2	0	0	21	1	2446.12	P27824	P27824	360	380	CANX	Calnexin	yes	yes	3	2.7862e-12	93.269	By MS/MS		By MS/MS	By MS/MS	By matching
CFGTGAAGNR	FLESIAMHDIIAAEKCFGTGAAGNRTSPQE	IAAEKCFGTGAAGNRTSPQEGERYNYSKCT	K	C	F	N	R	T	2	1	1	0	1	0	0	3	0	0	0	0	0	1	0	0	1	0	0	0	0	0	10	0	1009.44	P78527	P78527	1312	1321	PRKDC	DNA-dependent protein kinase catalytic subunit	yes	yes	2	0.037985	60.118	By matching			By MS/MS
CGVQNFK	SDPKPKINEDWLCNKCGVQNFKRREKCFKC	NEDWLCNKCGVQNFKRREKCFKCGVPKSEA	K	C	G	F	K	R	0	0	1	0	1	1	0	1	0	0	0	1	0	1	0	0	0	0	0	1	0	0	7	0	851.396	P98175	P98175	222	228	RBM10	RNA-binding protein 10	yes	yes	2	0.0033752	150.72	By MS/MS	By matching	By MS/MS	By MS/MS	By MS/MS
CNTCGEPITDR	GAPYCEGCYTDTLEKCNTCGEPITDRMLRA	TLEKCNTCGEPITDRMLRATGKAYHPHCFT	K	C	N	D	R	M	0	1	1	1	2	0	1	1	0	1	0	0	0	0	1	0	2	0	0	0	0	0	11	0	1321.54	Q15942	Q15942	444	454	ZYX	Zyxin	yes	yes	2	0.019085	63.283	By matching	By matching	By matching	By MS/MS	By matching
CPEPCPPPK	CKQPCQPPPVCPTPKCPEPCPPPKCPEPCP	VCPTPKCPEPCPPPKCPEPCPPPKCPQPCP	K	C	P	P	K	C	0	0	0	0	2	0	1	0	0	0	0	1	0	0	5	0	0	0	0	0	0	0	9	0	1080.47	P35326;P35325;P22532;P22531;Q9BYE4;Q96RM1	P35326	23	31	SPRR2A;SPRR2B;SPRR2D;SPRR2E;SPRR2G;SPRR2F	Small proline-rich protein 2A;Small proline-rich protein 2B;Small proline-rich protein 2D;Small proline-rich protein 2E;Small proline-rich protein 2G;Small proline-rich protein 2F	yes	no	2	0.041789	68.915
CSSILLHGK	HLLVMKGAPERILDRCSSILLHGKEQPLDE	ERILDRCSSILLHGKEQPLDEELKDAFQNA	R	C	S	G	K	E	0	0	0	0	1	0	0	1	1	1	2	1	0	0	0	2	0	0	0	0	0	0	9	0	1013.53	P05023	P05023	518	526	ATP1A1	Sodium/potassium-transporting ATPase subunit alpha-1	yes	yes	2	0.048769	60.436		By MS/MS
CVEENNGVAK	FGTSSSSATLPLMMKCVEENNGVAKHISRF	PLMMKCVEENNGVAKHISRFILPIGATVNM	K	C	V	A	K	H	1	0	2	0	1	0	2	1	0	0	0	1	0	0	0	0	0	0	0	2	0	0	10	0	1118.5	Q15758	Q15758	363	372	SLC1A5	Neutral amino acid transporter B(0)	yes	yes	2	0.0078994	73.248		By MS/MS		By matching
CVLNEGMPIYR	ITSHPGQIVKHGDIKCVLNEGMPIYRRPYE	GDIKCVLNEGMPIYRRPYEKGRLIIEFKVN	K	C	V	Y	R	R	0	1	1	0	1	0	1	1	0	1	1	0	1	0	1	0	0	0	1	1	0	0	11	0	1350.64	P31689	P31689	302	312	DNAJA1	DnaJ homolog subfamily A member 1	yes	yes	2	0.00083288	92.439	By MS/MS		By MS/MS	By MS/MS	By matching
CWAGSLWLFK	SDGALLLGASSLSGRCWAGSLWLFKDPCAA	SLSGRCWAGSLWLFKDPCAAPNEGFCSAGV	R	C	W	F	K	D	1	0	0	0	1	0	0	1	0	0	2	1	0	1	0	1	0	2	0	0	0	0	10	0	1266.62	Q9BQA1	Q9BQA1	53	62	WDR77	Methylosome protein 50	yes	yes	2	0.00023622	93.551	By MS/MS	By matching	By matching	By MS/MS	By MS/MS
DAAWYQLLMAPLSEDQR	EYQFFTQALITVQSRDAAWYQLLMAPLSED	AWYQLLMAPLSEDQRTALQEVYTLAEHRRT	R	D	A	Q	R	T	3	1	0	2	0	2	1	0	0	0	3	0	1	0	1	1	0	1	1	0	0	0	17	0	2005.96	O15397	O15397	972	988	IPO8	Importin-8	yes	yes	2	1.0831e-22	128.31	By MS/MS
DAEAWFNEK	NMRSQYEQLAEQNRKDAEAWFNEKSKELTT	AEQNRKDAEAWFNEKSKELTTEIDNNIEQI	K	D	A	E	K	S	2	0	1	1	0	0	2	0	0	0	0	1	0	1	0	0	0	1	0	0	0	0	9	0	1108.48	P13645;CON__P13645;CON__Q7Z3Y7;Q7Z3Y7;CON__Q148H6;Q7Z3Z0;Q7Z3Y8;CON__Q7Z3Y8;CON__Q7Z3Z0	P13645	335	343	KRT10;KRT28;KRT25;KRT27	Keratin, type I cytoskeletal 10;Keratin, type I cytoskeletal 28;Keratin, type I cytoskeletal 25;Keratin, type I cytoskeletal 27	yes	no	2	1.111e-18	179.21	By MS/MS	By MS/MS	By MS/MS	By MS/MS	By MS/MS
DAEEWFFTK	EMRDQYEKMAEKNRKDAEEWFFTKTEELNR	AEKNRKDAEEWFFTKTEELNREVATNSELV	K	D	A	T	K	T	1	0	0	1	0	0	2	0	0	0	0	1	0	2	0	0	1	1	0	0	0	0	9	0	1171.52	CON__P02533;P02533;CON__Q6IFX2	CON__P02533	301	309	KRT14	Keratin, type I cytoskeletal 14	yes	no	2	0.0020491	111.95				By matching	By matching
DAETWFLSK	EMRDQYEQMAEKNRRDAETWFLSKTEELNK	AEKNRRDAETWFLSKTEELNKEVASNSELV	R	D	A	S	K	T	1	0	0	1	0	0	1	0	0	0	1	1	0	1	0	1	1	1	0	0	0	0	9	0	1095.52	CON__P08779;P08779	CON__P08779	303	311	KRT16	Keratin, type I cytoskeletal 16	yes	no	2	0.0037006	103.56				By matching
DAFLGSFLYEYSR	FAEDKDVCKNYQEAKDAFLGSFLYEYSRRH	AKDAFLGSFLYEYSRRHPEYAVSVLLRLAK	K	D	A	S	R	R	1	1	0	1	0	0	1	1	0	0	2	0	0	2	0	2	0	0	2	0	0	0	13	0	1566.74	CON__P02769	CON__P02769	347	359			yes	yes	2	0.040116	41.283
DAGQISGLNVLR	TVPAYFNDSQRQATKDAGQISGLNVLRVIN	ATKDAGQISGLNVLRVINEPTAAALAYGLD	K	D	A	L	R	V	1	1	1	1	0	1	0	2	0	1	2	0	0	0	0	1	0	0	0	1	0	0	12	0	1241.67	P38646	P38646	207	218	HSPA9	Stress-70 protein, mitochondrial	yes	yes	2	4.0635e-24	173.37	By MS/MS	By MS/MS	By MS/MS	By matching
DAGTIAGLNVLR	TVPAYFNDSQRQATKDAGTIAGLNVLRIIN	ATKDAGTIAGLNVLRIINEPTAAAIAYGLD	K	D	A	L	R	I	2	1	1	1	0	0	0	2	0	1	2	0	0	0	0	0	1	0	0	1	0	0	12	0	1198.67	P11142	P11142	160	171	HSPA8	Heat shock cognate 71 kDa protein	yes	yes	2	1.8639e-23	171.36	By MS/MS	By MS/MS	By MS/MS	By MS/MS	By MS/MS
DAGTIAGLNVMR	TVPAYFNDAQRQATKDAGTIAGLNVMRIIN	ATKDAGTIAGLNVMRIINEPTAAAIAYGLD	K	D	A	M	R	I	2	1	1	1	0	0	0	2	0	1	1	0	1	0	0	0	1	0	0	1	0	0	12	0	1216.62	P11021	P11021	186	197	HSPA5	78 kDa glucose-regulated protein	yes	yes	2	0.035323	48.283
DAGVIAGLNVLR	TVPAYFNDSQRQATKDAGVIAGLNVLRIIN	ATKDAGVIAGLNVLRIINEPTAAAIAYGLD	K	D	A	L	R	I	2	1	1	1	0	0	0	2	0	1	2	0	0	0	0	0	0	0	0	2	0	0	12	0	1196.69	P0DMV9;P0DMV8	P0DMV9	160	171	HSPA1B;HSPA1A	Heat shock 70 kDa protein 1B;Heat shock 70 kDa protein 1A	no	no	2	2.3471e-18	159.58	By MS/MS	By MS/MS	By MS/MS	By MS/MS	By MS/MS
DAKLDKSQIHDIVLVGGSTR	DLFRGTLDPVEKALRDAKLDKSQIHDIVLV	KSQIHDIVLVGGSTRIPKIQKLLQDFFNGK	R	D	A	T	R	I	1	1	0	3	0	1	0	2	1	2	2	2	0	0	0	2	1	0	0	2	0	0	20	2	2151.16	P11142	P11142	323	342	HSPA8	Heat shock cognate 71 kDa protein	yes	yes	4	0.0071932	49.528	By matching	By MS/MS
DATSKDQLISELK	EQFLQQKVMVEAYRRDATSKDQLISELKAT	RRDATSKDQLISELKATRKRLDSELKELRQ	R	D	A	L	K	A	1	0	0	2	0	1	1	0	0	1	2	2	0	0	0	2	1	0	0	0	0	0	13	1	1446.76	Q08378	Q08378	858	870	GOLGA3	Golgin subfamily A member 3	yes	yes	2	0.034737	47.894			By MS/MS
DATWSPLNHSLLTTVGWDHQVVHHVVPTEPLPAPGPASVTE	LSELFRSQAHRDFVRDATWSPLNHSLLTTV	PTEPLPAPGPASVTE_______________	R	D	A	T	E	-	3	0	1	2	0	1	2	2	4	0	4	0	0	0	6	3	5	2	0	6	0	0	41	0	4391.2	Q9BQA1	Q9BQA1	302	342	WDR77	Methylosome protein 50	yes	yes	5	8.895e-10	48.07	By MS/MS	By matching
DAVEDLESVGK	DGAKKAVGGLGKLGKDAVEDLESVGKGAVH	KLGKDAVEDLESVGKGAVHDVKDVLDSVL_	K	D	A	G	K	G	1	0	0	2	0	0	2	1	0	0	1	1	0	0	0	1	0	0	0	2	0	0	11	0	1160.56	P81605	P81605	86	96	DCD	Dermcidin;Survival-promoting peptide;DCD-1	yes	yes	2	0.00075771	93.111	By matching	By matching	By MS/MS	By MS/MS	By MS/MS
DAVTYTEHAK	ETRGVLKVFLENVIRDAVTYTEHAKRKTVT	ENVIRDAVTYTEHAKRKTVTAMDVVYALKR	R	D	A	A	K	R	2	0	0	1	0	0	1	0	1	0	0	1	0	0	0	0	2	0	1	1	0	0	10	0	1133.54	P62805	P62805	69	78	HIST1H4A	Histone H4	yes	yes	2;3	1.2584e-06	138.1	By matching	By matching	By matching	By MS/MS	By matching
DCANVNDFFMR	SVEHDHPHALEFLRKDCANVNDFFMRHSVA	FLRKDCANVNDFFMRHSVAVMTVRELFEFV	K	D	C	M	R	H	1	1	2	2	1	0	0	0	0	0	0	0	1	2	0	0	0	0	0	1	0	0	11	0	1387.56	Q9BRS2	Q9BRS2	360	370	RIOK1	Serine/threonine-protein kinase RIO1	yes	yes	2	0.012241	65.347	By MS/MS	By matching	By matching	By matching
DCGSVSTVDEFPEAR	KGELDLSLENLDLSKDCGSVSTVDEFPEAR	DCGSVSTVDEFPEARGEHVHSLPEASVSSK	K	D	C	A	R	G	1	1	0	2	1	0	2	1	0	0	0	0	0	1	1	2	1	0	0	2	0	0	15	0	1667.71	Q01804	Q01804	902	916	OTUD4	OTU domain-containing protein 4	yes	yes	2	2.0826e-05	98.353			By MS/MS
DDGVSIPGEYTSFLAPISSSK	ELSPECLDGAQHFLKDDGVSIPGEYTSFLA	PGEYTSFLAPISSSKLYNEVRACREKDRDP	K	D	D	S	K	L	1	0	0	2	0	0	1	2	0	2	1	1	0	1	2	5	1	0	1	1	0	0	21	0	2169.05	O14744	O14744	459	479	PRMT5	Protein arginine N-methyltransferase 5;Protein arginine N-methyltransferase 5, N-terminally processed	yes	yes	2	2.0063e-26	119.31	By MS/MS	By matching	By MS/MS	By MS/MS	By MS/MS
DDIIENAPTTHTEEYSGEEK	MFWMRVPLVAPEDLRDDIIENAPTTHTEEY	NAPTTHTEEYSGEEKTWMWWHNFRTLCDYS	R	D	D	E	K	T	1	0	1	2	0	0	5	1	1	2	0	1	0	0	1	1	3	0	1	0	0	0	20	0	2276.99	O14744	O14744	165	184	PRMT5	Protein arginine N-methyltransferase 5;Protein arginine N-methyltransferase 5, N-terminally processed	yes	yes	2;3	7.407e-156	228.35	By MS/MS	By MS/MS	By MS/MS	By MS/MS	By MS/MS
DDYSRDDYR	EDRYDRRDDRSWSSRDDYSRDDYRRDDRGP	RSWSSRDDYSRDDYRRDDRGPPQRPKLNLK	R	D	D	Y	R	R	0	2	0	4	0	0	0	0	0	0	0	0	0	0	0	1	0	0	2	0	0	0	9	1	1203.48	P23588	P23588	314	322	EIF4B	Eukaryotic translation initiation factor 4B	yes	yes	3	0.025388	42.348	By matching	By matching	By MS/MS		By matching
DDYSRDDYRR	EDRYDRRDDRSWSSRDDYSRDDYRRDDRGP	SWSSRDDYSRDDYRRDDRGPPQRPKLNLKP	R	D	D	R	R	D	0	3	0	4	0	0	0	0	0	0	0	0	0	0	0	1	0	0	2	0	0	0	10	2	1359.58	P23588	P23588	314	323	EIF4B	Eukaryotic translation initiation factor 4B	yes	yes	3	0.026553	59.542	By matching	By matching	By matching	By MS/MS	By MS/MS
DEGGKAFFK	IMYTGTLDCWRKIARDEGGKAFFKGAWSNV	WRKIARDEGGKAFFKGAWSNVLRGMGGAFV	R	D	E	F	K	G	1	0	0	1	0	0	1	2	0	0	0	2	0	2	0	0	0	0	0	0	0	0	9	1	997.487	P05141;P12236	P05141	264	272	SLC25A5;SLC25A6	ADP/ATP translocase 2;ADP/ATP translocase 2, N-terminally processed;ADP/ATP translocase 3;ADP/ATP translocase 3, N-terminally processed	no	no	2	0.002575	130.75		By MS/MS
DFLAGGIAAAISK	______________________________	AKDFLAGGIAAAISKTAVAPIERVKLLLQV	K	D	F	S	K	T	4	0	0	1	0	0	0	2	0	2	1	1	0	1	0	1	0	0	0	0	0	0	13	0	1232.68	P12236	P12236	11	23	SLC25A6	ADP/ATP translocase 3;ADP/ATP translocase 3, N-terminally processed	yes	yes	2	9.3915e-14	133.07	By MS/MS	By MS/MS	By MS/MS		By MS/MS
DFLAGGVAAAISK	______________________________	AKDFLAGGVAAAISKTAVAPIERVKLLLQV	K	D	F	S	K	T	4	0	0	1	0	0	0	2	0	1	1	1	0	1	0	1	0	0	0	1	0	0	13	0	1218.66	P05141	P05141	11	23	SLC25A5	ADP/ATP translocase 2;ADP/ATP translocase 2, N-terminally processed	yes	yes	2	2.2723e-05	100.93	By MS/MS	By MS/MS	By MS/MS	By MS/MS	By MS/MS
DFSPSGIFGAFQR	LEVKLGELPSWILMRDFSPSGIFGAFQRGY	MRDFSPSGIFGAFQRGYYRYYNKYINVKKG	R	D	F	Q	R	G	1	1	0	1	0	1	0	2	0	1	0	0	0	3	1	2	0	0	0	0	0	0	13	0	1427.68	P56134	P56134	34	46	ATP5J2	ATP synthase subunit f, mitochondrial	yes	yes	2	2.4427e-07	108.67	By MS/MS	By MS/MS	By MS/MS	By MS/MS	By matching
DFTPAELR	SDDDEPPPLPRLKRRDFTPAELRRFDGVQD	LPRLKRRDFTPAELRRFDGVQDPRILMAIN	R	D	F	L	R	R	1	1	0	1	0	0	1	0	0	0	1	0	0	1	1	0	1	0	0	0	0	0	8	0	947.471	O00264	O00264	72	79	PGRMC1	Membrane-associated progesterone receptor component 1	yes	yes	2	0.0055916	114.6	By MS/MS	By MS/MS	By MS/MS	By matching	By matching
DFTPAELRR	SDDDEPPPLPRLKRRDFTPAELRRFDGVQD	PRLKRRDFTPAELRRFDGVQDPRILMAING	R	D	F	R	R	F	1	2	0	1	0	0	1	0	0	0	1	0	0	1	1	0	1	0	0	0	0	0	9	1	1103.57	O00264	O00264	72	80	PGRMC1	Membrane-associated progesterone receptor component 1	yes	yes	3	0.002731	74.464	By matching	By MS/MS
DFTPVCTTELGR	DFLGDSWGILFSHPRDFTPVCTTELGRAAK	HPRDFTPVCTTELGRAAKLAPEFAKRNVKL	R	D	F	G	R	A	0	1	0	1	1	0	1	1	0	0	1	0	0	1	1	0	3	0	0	1	0	0	12	0	1394.65	P30041	P30041	42	53	PRDX6	Peroxiredoxin-6	yes	yes	2	0.0018868	85.377	By matching
DFVAEPMGEKPVGSLAGIGEVLGK	______________________________	KPVGSLAGIGEVLGKKLEERGFDKAYVVLG	R	D	F	G	K	K	2	0	0	1	0	0	3	5	0	1	2	2	1	1	2	1	0	0	0	3	0	0	24	1	2399.24	O75531	O75531	9	32	BANF1	Barrier-to-autointegration factor;Barrier-to-autointegration factor, N-terminally processed	yes	yes	3	6.593e-50	133.1
DGAGFLINLIDSPGHVDFSSEVTAALR	YELSENDLNFIKQSKDGAGFLINLIDSPGH	PGHVDFSSEVTAALRVTDGALVVVDCVSGV	K	D	G	L	R	V	3	1	1	3	0	0	1	3	1	2	3	0	0	2	1	3	1	0	0	2	0	0	27	0	2800.4	P13639	P13639	94	120	EEF2	Elongation factor 2	yes	yes	3	1.0669e-36	117.82	By MS/MS			By MS/MS
DGDYRDQDYR	RRHRHSPTGPPGFPRDGDYRDQDYRTEQGE	PGFPRDGDYRDQDYRTEQGEEEEEEEDEEE	R	D	G	Y	R	T	0	2	0	4	0	1	0	1	0	0	0	0	0	0	0	0	0	0	2	0	0	0	10	1	1301.53	P98175	P98175	99	108	RBM10	RNA-binding protein 10	yes	yes	3	0.0020189	79.659		By matching	By MS/MS	By matching	By matching
DGLGSDNIGSR	GGISTASVDFEQPTRDGLGSDNIGSRMLQA	QPTRDGLGSDNIGSRMLQAMGWKEGSGLGR	R	D	G	S	R	M	0	1	1	2	0	0	0	3	0	1	1	0	0	0	0	2	0	0	0	0	0	0	11	0	1089.51	P98175	P98175	854	864	RBM10	RNA-binding protein 10	yes	yes	2	2.2634e-08	131.22			By MS/MS
DGMNVLGLIGFFIAFGIAMGK	PEETKMVIKKGLEFKDGMNVLGLIGFFIAF	GLIGFFIAFGIAMGKMGDQAKLMVDFFNIL	K	D	G	G	K	M	2	0	1	1	0	0	0	5	0	3	2	1	2	3	0	0	0	0	0	1	0	0	21	0	2170.13	P43004	P43004	238	258	SLC1A2	Excitatory amino acid transporter 2	yes	yes	3	0.0085161	49.973	By matching				By matching
DGQGTAGGHGSGGGQRPGGGHGSGGGQGPGDGHGSGGGK	QGSNGQGSGGNQCSRDGQGTAGGHGSGGGQ	GGQGPGDGHGSGGGKNSGGGKGSGSGKGSD	R	D	G	G	K	N	1	1	0	2	0	3	0	22	3	0	0	1	0	0	2	3	1	0	0	0	0	0	39	1	3209.37	O14654	O14654	548	586	IRS4	Insulin receptor substrate 4	yes	yes	5	5.113e-15	57.184		By MS/MS	By matching
DGSCLFR	AYLRKLGLYRKLVAKDGSCLFRAVAEQVLH	LYRKLVAKDGSCLFRAVAEQVLHSQSRHVE	K	D	G	F	R	A	0	1	0	1	1	0	0	1	0	0	1	0	0	1	0	1	0	0	0	0	0	0	7	0	853.375	Q01804	Q01804	42	48	OTUD4	OTU domain-containing protein 4	yes	yes	2	0.015267	111.28		By matching	By matching	By matching
DGYRDGYR	FGDKYRDRYDSDRYRDGYRDGYRDGPRRDM	YDSDRYRDGYRDGYRDGPRRDMDRYGGRDR	R	D	G	Y	R	D	0	2	0	2	0	0	0	2	0	0	0	0	0	0	0	0	0	0	2	0	0	0	8	1	1000.44	P23588	P23588	235	242	EIF4B	Eukaryotic translation initiation factor 4B	yes	yes	3	0.018957	76.827	By matching	By matching	By matching	By matching
DHPLPEVAHVK	VKSEDFSLPAYMDRRDHPLPEVAHVKHLSA	MDRRDHPLPEVAHVKHLSASQKALKEKEKA	R	D	H	V	K	H	1	0	0	1	0	0	1	0	2	0	1	1	0	0	2	0	0	0	0	2	0	0	11	0	1240.66	P13073	P13073	43	53	COX4I1	Cytochrome c oxidase subunit 4 isoform 1, mitochondrial	yes	yes	3	4.5816e-09	130.01		By MS/MS
DIDPVQR	YIIAKLLADELISPKDIDPVQRYVPLKDQR	ADELISPKDIDPVQRYVPLKDQRNVSMRFS	K	D	I	Q	R	Y	0	1	0	2	0	1	0	0	0	1	0	0	0	0	1	0	0	0	0	1	0	0	7	0	841.429	Q93100	Q93100	463	469	PHKB	Phosphorylase b kinase regulatory subunit beta	yes	yes	2	0.017776	106.76	By MS/MS	By matching	By matching		By matching
DIENQYETQITQIEHEVSSSGQEVQSSAK	DMRQEYEQLIAKNRKDIENQYETQITQIEH	HEVSSSGQEVQSSAKEVTQLRHGVQELEIE	K	D	I	A	K	E	1	0	1	1	0	5	5	1	1	3	0	1	0	0	0	5	2	0	1	2	0	0	29	0	3263.51	P35527;CON__P35527	P35527	340	368	KRT9	Keratin, type I cytoskeletal 9	yes	no	3	0	337.8			By MS/MS	By MS/MS	By MS/MS
DIKPDNLLLDAK	VLAIDAIHQLGFIHRDIKPDNLLLDAKGHV	IHRDIKPDNLLLDAKGHVKLSDFGLCTGLK	R	D	I	A	K	G	1	0	1	3	0	0	0	0	0	1	3	2	0	0	1	0	0	0	0	0	0	0	12	1	1353.75	Q9Y2H1	Q9Y2H1	213	224	STK38L	Serine/threonine-protein kinase 38-like	yes	yes	2;3	3.2229e-06	107.06	By MS/MS	By MS/MS	By MS/MS	By matching
DIKPDNLLLDSK	VLAIDSIHQLGFIHRDIKPDNLLLDSKGHV	IHRDIKPDNLLLDSKGHVKLSDFGLCTGLK	R	D	I	S	K	G	0	0	1	3	0	0	0	0	0	1	3	2	0	0	1	1	0	0	0	0	0	0	12	1	1369.75	Q15208	Q15208	212	223	STK38	Serine/threonine-protein kinase 38	yes	yes	2;3	3.4146e-13	146.79	By MS/MS	By MS/MS	By MS/MS	By MS/MS	By matching
DIKPDNLLLDSKGHVK	VLAIDSIHQLGFIHRDIKPDNLLLDSKGHV	IKPDNLLLDSKGHVKLSDFGLCTGLKKAHR	R	D	I	V	K	L	0	0	1	3	0	0	0	1	1	1	3	3	0	0	1	1	0	0	0	1	0	0	16	2	1790.99	Q15208	Q15208	212	227	STK38	Serine/threonine-protein kinase 38	yes	yes	3;4	2.2251e-16	119.54		By MS/MS
DISLSDYK	PNFKATAVMPDGQFKDISLSDYKGKYVVFF	MPDGQFKDISLSDYKGKYVVFFFYPLDFTF	K	D	I	Y	K	G	0	0	0	2	0	0	0	0	0	1	1	1	0	0	0	2	0	0	1	0	0	0	8	0	939.455	Q06830	Q06830	28	35	PRDX1	Peroxiredoxin-1	yes	yes	2	0.043853	75.109	By matching	By matching	By matching	By matching	By matching
DKDPILRR	GRMEEADALIESLCRDKDPILRRSGMYTVA	LIESLCRDKDPILRRSGMYTVAMAYCGSGN	R	D	K	R	R	S	0	2	0	2	0	0	0	0	0	1	1	1	0	0	1	0	0	0	0	0	0	0	8	2	1011.58	Q99460	Q99460	573	580	PSMD1	26S proteasome non-ATPase regulatory subunit 1	yes	yes	3	0.034607	71.692		By MS/MS			By matching
DKPHVNVGTIGHVDHGK	LCRGLAVEAKKTYVRDKPHVNVGTIGHVDH	PHVNVGTIGHVDHGKTTLTAAITKILAEGG	R	D	K	G	K	T	0	0	1	2	0	0	0	3	3	1	0	2	0	0	1	0	1	0	0	3	0	0	17	1	1808.93	P49411	P49411	54	70	TUFM	Elongation factor Tu, mitochondrial	yes	yes	4	1.7555e-32	141.22	By MS/MS	By MS/MS	By matching		By matching
DKPTHEILQK	PELGQQPDVNISEWKDKPTHEILQKLNDCS	ISEWKDKPTHEILQKLNDCSCLASQAILLG	K	D	K	Q	K	L	0	0	0	1	0	1	1	0	1	1	1	2	0	0	1	0	1	0	0	0	0	0	10	1	1207.66	Q93100	Q93100	721	730	PHKB	Phosphorylase b kinase regulatory subunit beta	yes	yes	3	0.02014	58.172	By MS/MS	By matching	By matching	By matching	By matching
DKVQAGDVITIDK	TIYDLGTKMIESLTKDKVQAGDVITIDKAT	TKDKVQAGDVITIDKATGKISKLGRSFTRA	K	D	K	D	K	A	1	0	0	3	0	1	0	1	0	2	0	2	0	0	0	0	1	0	0	2	0	0	13	1	1400.75	Q9Y230	Q9Y230	185	197	RUVBL2	RuvB-like 2	yes	yes	2	0.018072	51.092			By MS/MS
DKYEPAAVSEQGDKK	______________________________	DKYEPAAVSEQGDKKGKKGKKDRDMDELKK	R	D	K	K	K	G	2	0	0	2	0	1	2	1	0	0	0	3	0	0	1	1	0	0	1	1	0	0	15	2	1663.81	P05023	P05023	8	22	ATP1A1	Sodium/potassium-transporting ATPase subunit alpha-1	yes	yes	3	0.033801	51.147			By MS/MS		By matching
DLAALGDKVNSLGETAER	ASVQALQRKHEGFERDLAALGDKVNSLGET	ALGDKVNSLGETAERLIQSHPESAEDLQEK	R	D	L	E	R	L	3	1	1	2	0	0	2	2	0	0	3	1	0	0	0	1	1	0	0	1	0	0	18	1	1857.94	Q13813	Q13813	1281	1298	SPTAN1	Spectrin alpha chain, non-erythrocytic 1	yes	yes	3	0.016833	41.871
DLAGRLPAGPR	______________________________	QNLKDLAGRLPAGPRGMGTALKLLLGAGAV	K	D	L	P	R	G	2	2	0	1	0	0	0	2	0	0	2	0	0	0	2	0	0	0	0	0	0	0	11	1	1121.63	Q99623	Q99623	7	17	PHB2	Prohibitin-2	yes	yes	3	0.01673	57.785		By MS/MS
DLAGSIIGK	DLGGPIITTQVTIPKDLAGSIIGKGGQRIK	QVTIPKDLAGSIIGKGGQRIKQIRHESGAS	K	D	L	G	K	G	1	0	0	1	0	0	0	2	0	2	1	1	0	0	0	1	0	0	0	0	0	0	9	0	872.497	P61978	P61978	397	405	HNRNPK	Heterogeneous nuclear ribonucleoprotein K	yes	yes	2	0.045238	71.501	By MS/MS	By MS/MS	By matching	By matching
DLDITSPELR	EVIIVLERSESWNLKDLDITSPELRSVCHV	SWNLKDLDITSPELRSVCHVPGLKKMLRTC	K	D	L	L	R	S	0	1	0	2	0	0	1	0	0	1	2	0	0	0	1	1	1	0	0	0	0	0	10	0	1157.59	P19474	P19474	261	270	TRIM21	E3 ubiquitin-protein ligase TRIM21	yes	yes	2	0.051449	56.432
DLEAEHVEVEDTTLNR	______________________________	LEAEHVEVEDTTLNRCSCSFRVLVVSAKFE	R	D	L	N	R	C	1	1	1	2	0	0	4	0	1	0	2	0	0	0	0	0	2	0	0	2	0	0	16	0	1868.88	Q9H3K6	Q9H3K6	15	30	BOLA2	BolA-like protein 2	yes	yes	3	1.2967e-42	158.17		By MS/MS	By MS/MS	By MS/MS	By matching
DLEGSDIDTRR	DEEAFEDNSEEYIRRDLEGSDIDTRRRAAC	YIRRDLEGSDIDTRRRAACDLVRGLCKFFE	R	D	L	R	R	R	0	2	0	3	0	0	1	1	0	1	1	0	0	0	0	1	1	0	0	0	0	0	11	1	1275.61	P55060	P55060	373	383	CSE1L	Exportin-2	yes	yes	2	0.025607	47.603		By MS/MS
DLEKPFLLPVEAVYSVPGR	KLLDAVDTYIPVPARDLEKPFLLPVEAVYS	PFLLPVEAVYSVPGRGTVVTGTLERGILKK	R	D	L	G	R	G	1	1	0	1	0	0	2	1	0	0	3	1	0	1	3	1	0	0	1	3	0	0	19	1	2128.16	P49411	P49411	253	271	TUFM	Elongation factor Tu, mitochondrial	yes	yes	3	4.5148e-16	110.56	By MS/MS	By MS/MS	By MS/MS	By MS/MS	By matching
DLETRPTQHELR	SKIDALSSEKLNLQKDLETRPTQHELRLYK	LQKDLETRPTQHELRLYKQQVKKLEKALKK	K	D	L	L	R	L	0	2	0	1	0	1	2	0	1	0	2	0	0	0	1	0	2	0	0	0	0	0	12	1	1493.76	Q8NHQ1	Q8NHQ1	286	297	CEP70	Centrosomal protein of 70 kDa	yes	yes	4	0.0075067	48.659		By MS/MS	By matching
DLHDANTDLIGRHPK	SKASLEKAGKSGVKKDLHDANTDLIGRHPK	DLHDANTDLIGRHPKQEKRSVFQTINQFLD	K	D	L	P	K	Q	1	1	1	3	0	0	0	1	2	1	2	1	0	0	1	0	1	0	0	0	0	0	15	1	1700.86	P53985	P53985	225	239	SLC16A1	Monocarboxylate transporter 1	yes	yes	4	0.00079657	67.358		By MS/MS
DLKPQNLLIDDKGTIK	LQGIVFCHSRRVLHRDLKPQNLLIDDKGTI	LKPQNLLIDDKGTIKLADFGLARAFGIPIR	R	D	L	I	K	L	0	0	1	3	0	1	0	1	0	2	3	3	0	0	1	0	1	0	0	0	0	0	16	2	1810.02	P06493	P06493	128	143	CDK1	Cyclin-dependent kinase 1	yes	yes	3	0.0091613	60.918	By MS/MS			By MS/MS
DLLHPSPEEEKRK	______________________________	AKDLLHPSPEEEKRKHKKKRLVQSPNSYFM	K	D	L	R	K	H	0	1	0	1	0	0	3	0	1	0	2	2	0	0	2	1	0	0	0	0	0	0	13	2	1576.82	P42677	P42677	6	18	RPS27	40S ribosomal protein S27	yes	yes	3;4	4.5104e-25	157.52	By MS/MS	By MS/MS	By MS/MS		By matching
DLNCVPEIADTLGAVAK	MAVGGAGGSRVSSGRDLNCVPEIADTLGAV	NCVPEIADTLGAVAKQGFDFLCMPVFHPRF	R	D	L	A	K	Q	3	0	1	2	1	0	1	1	0	1	2	1	0	0	1	0	1	0	0	2	0	0	17	0	1784.9	O14744	O14744	19	35	PRMT5	Protein arginine N-methyltransferase 5;Protein arginine N-methyltransferase 5, N-terminally processed	yes	yes	2;3	5.2045e-37	152.71	By MS/MS	By MS/MS	By MS/MS	By MS/MS	By MS/MS
DLPLLLFR	GLNGAVFRPEVPLRRDLPLLLFRTQTSDPA	PEVPLRRDLPLLLFRTQTSDPAMLPTMIGL	R	D	L	F	R	T	0	1	0	1	0	0	0	0	0	0	4	0	0	1	1	0	0	0	0	0	0	0	8	0	985.596	O43175	O43175	462	469	PHGDH	D-3-phosphoglycerate dehydrogenase	yes	yes	2	0.00079411	151.17	By matching	By MS/MS
DLQQYQSQAK	LPLAASMQEDEQSGRDLQQYQSQAKQLFRK	EQSGRDLQQYQSQAKQLFRKLNEQSPTRCT	R	D	L	A	K	Q	1	0	0	1	0	4	0	0	0	0	1	1	0	0	0	1	0	0	1	0	0	0	10	0	1207.58	O75396	O75396	29	38	SEC22B	Vesicle-trafficking protein SEC22b	yes	yes	2	0.00096852	96.331			By MS/MS
DLSHIGDAVVISCAK	CVVKMPSGEFARICRDLSHIGDAVVISCAK	DLSHIGDAVVISCAKDGVKFSASGELGNGN	R	D	L	A	K	D	2	0	0	2	1	0	0	1	1	2	1	1	0	0	0	2	0	0	0	2	0	0	15	0	1583.8	P12004	P12004	150	164	PCNA	Proliferating cell nuclear antigen	yes	yes	2;3	5.1928e-05	93.345	By MS/MS	By matching	By MS/MS	By MS/MS	By matching
DLSSVQTLLTK	IGEKENSLKTDDYGRDLSSVQTLLTKQETF	DYGRDLSSVQTLLTKQETFDAGLQAFQQEG	R	D	L	T	K	Q	0	0	0	1	0	1	0	0	0	0	3	1	0	0	0	2	2	0	0	1	0	0	11	0	1203.67	Q13813	Q13813	2007	2017	SPTAN1	Spectrin alpha chain, non-erythrocytic 1	yes	yes	2	4.331e-08	118.71			By MS/MS	By matching
DLTDYLMK	YALPHAILRLDLAGRDLTDYLMKILTERGY	RLDLAGRDLTDYLMKILTERGYSFTTTAER	R	D	L	M	K	I	0	0	0	2	0	0	0	0	0	0	2	1	1	0	0	0	1	0	1	0	0	0	8	0	997.479	P63267;P68133;P68032;P62736;P63261;P60709;Q562R1	P63261	184	191	ACTG2;ACTA1;ACTC1;ACTA2;ACTG1;ACTB;ACTBL2	Actin, gamma-enteric smooth muscle;Actin, alpha skeletal muscle;Actin, alpha cardiac muscle 1;Actin, aortic smooth muscle;Actin, cytoplasmic 2;Actin, cytoplasmic 2, N-terminally processed;Actin, cytoplasmic 1;Actin, cytoplasmic 1, N-terminally processed;Beta-actin-like protein 2	no	no	2	0.039766	79.597	By matching	By MS/MS	By MS/MS	By matching	By matching
DLVHSNKKEQEFR	ARPSGLLAQERKLCRDLVHSNKKEQEFRSI	CRDLVHSNKKEQEFRSIFQHIQSAQSQRSP	R	D	L	F	R	S	0	1	1	1	0	1	2	0	1	0	1	2	0	1	0	1	0	0	0	1	0	0	13	2	1628.83	Q9Y2W1	Q9Y2W1	596	608	THRAP3	Thyroid hormone receptor-associated protein 3	yes	yes	4	4.2345e-12	115.8	By matching	By MS/MS
DLVILLYETALLSSGFSLEDPQTHANR	LRQKAEADKNDKSVKDLVILLYETALLSSG	SSGFSLEDPQTHANRIYRMIKLGLGIDEDD	K	D	L	N	R	I	2	1	1	2	0	1	2	1	1	1	6	0	0	1	1	3	2	0	1	1	0	0	27	0	3001.54	P07900	P07900	661	687	HSP90AA1	Heat shock protein HSP 90-alpha	yes	yes	3	1.3028e-59	131.37	By MS/MS	By MS/MS		By MS/MS
DLVVLLFETALLSSGFSLEDPQTHSNR	LRQKAEADKNDKAVKDLVVLLFETALLSSG	SSGFSLEDPQTHSNRIYRMIKLGLGIDEDE	K	D	L	N	R	I	1	1	1	2	0	1	2	1	1	0	6	0	0	2	1	4	2	0	0	2	0	0	27	0	2987.52	P08238	P08238	653	679	HSP90AB1	Heat shock protein HSP 90-beta	yes	yes	3;4	2.2523e-14	86.006	By MS/MS		By MS/MS	By MS/MS	By MS/MS
DLYANTVLSGGTTMYPGIADR	TTFNSIMKCDVDIRKDLYANTVLSGGTTMY	VLSGGTTMYPGIADRMQKEITALAPSTMKI	K	D	L	D	R	M	2	1	1	2	0	0	0	3	0	1	2	0	1	0	1	1	3	0	2	1	0	0	21	0	2214.06	P63261;P60709	P63261	292	312	ACTG1;ACTB	Actin, cytoplasmic 2;Actin, cytoplasmic 2, N-terminally processed;Actin, cytoplasmic 1;Actin, cytoplasmic 1, N-terminally processed	yes	no	2	9.8187e-05	68.972			By MS/MS	By matching	By matching
DMPIQAFLLYQEPVLGPVR	KVLPVPQKAVPYPQRDMPIQAFLLYQEPVL	QAFLLYQEPVLGPVRGPFPIIV________	R	D	M	V	R	G	1	1	0	1	0	2	1	1	0	1	3	0	1	1	3	0	0	0	1	2	0	0	19	0	2185.16	CON__P02666	CON__P02666	184	202			yes	yes	2;3	8.7069e-10	84.506				By MS/MS
DMSDNVLYQNR	GPGRNMPNSQMVNIRDMSDNVLYQNRNYHL	VNIRDMSDNVLYQNRNYHLTPRTSLHTASS	R	D	M	N	R	N	0	1	2	2	0	1	0	0	0	0	1	0	1	0	0	1	0	0	1	1	0	0	11	0	1353.6	Q7Z353	Q7Z353	359	369	HDX	Highly divergent homeobox	yes	yes	2	1.2011e-25	142.92	By MS/MS	By MS/MS		By MS/MS
DNIQGITKPAIR	GLGKGGAKRHRKVLRDNIQGITKPAIRRLA	VLRDNIQGITKPAIRRLARRGGVKRISGLI	R	D	N	I	R	R	1	1	1	1	0	1	0	1	0	3	0	1	0	0	1	0	1	0	0	0	0	0	12	1	1324.75	P62805	P62805	25	36	HIST1H4A	Histone H4	yes	yes	2;3	0.00072916	94.297	By matching	By matching	By matching	By matching
DNIVEGIIR	IFPFNIHENDRQQIRDNIVEGIIRSPDLVR	DRQQIRDNIVEGIIRSPDLVRVQLTMCLRA	R	D	N	I	R	S	0	1	1	1	0	0	1	1	0	3	0	0	0	0	0	0	0	0	0	1	0	0	9	0	1027.57	O15397	O15397	94	102	IPO8	Importin-8	yes	yes	2	6.2687e-06	151.04	By MS/MS	By MS/MS	By MS/MS	By MS/MS	By MS/MS
DNMSIVLVCFSNAPK	VCNWVVDTCLHKGSRDNMSIVLVCFSNAPK	DNMSIVLVCFSNAPKVSDEAVKKDSELDKH	R	D	N	P	K	V	1	0	2	1	1	0	0	0	0	1	1	1	1	1	1	2	0	0	0	2	0	0	15	0	1693.82	O75688	O75688	286	300	PPM1B	Protein phosphatase 1B	yes	yes	2	6.809e-52	156.69	By matching	By MS/MS	By MS/MS	By MS/MS
DNNLLGR	GVLIQVYEGERAMTKDNNLLGRFELSGIPP	EGERAMTKDNNLLGRFELSGIPPAPRGVPQ	K	D	N	G	R	F	0	1	2	1	0	0	0	1	0	0	2	0	0	0	0	0	0	0	0	0	0	0	7	0	800.414	P0DMV9;P0DMV8;P17066	P0DMV9	452	458	HSPA1B;HSPA1A;HSPA6	Heat shock 70 kDa protein 1B;Heat shock 70 kDa protein 1A;Heat shock 70 kDa protein 6	no	no	2	0.01118	114.19		By matching	By MS/MS
DNTVHDLR	LMAKVEDMQRSMLSKDNTVHDLRQQMTALQ	QRSMLSKDNTVHDLRQQMTALQSQLQQVQL	K	D	N	L	R	Q	0	1	1	2	0	0	0	0	1	0	1	0	0	0	0	0	1	0	0	1	0	0	8	0	968.468	Q08378	Q08378	530	537	GOLGA3	Golgin subfamily A member 3	yes	yes	2	0.011752	101.72	By matching	By matching	By matching	By MS/MS	By matching
DPCAAPNEGFCSAGVQTEAGVADLTWVGER	SLSGRCWAGSLWLFKDPCAAPNEGFCSAGV	QTEAGVADLTWVGERGILVASDSGAVELWE	K	D	P	E	R	G	5	1	1	2	2	1	3	4	0	0	1	0	0	1	2	1	2	1	0	3	0	0	30	0	3163.4	Q9BQA1	Q9BQA1	63	92	WDR77	Methylosome protein 50	yes	yes	3	9.464e-170	210.73	By MS/MS	By MS/MS	By MS/MS	By MS/MS	By MS/MS
DPMIDNNR	LSAPQPCFTFSHPNRDPMIDNNRYCTLEFP	TFSHPNRDPMIDNNRYCTLEFPVEVNTVLH	R	D	P	N	R	Y	0	1	2	2	0	0	0	0	0	1	0	0	1	0	1	0	0	0	0	0	0	0	8	0	973.429	O14744	O14744	527	534	PRMT5	Protein arginine N-methyltransferase 5;Protein arginine N-methyltransferase 5, N-terminally processed	yes	yes	2	0.00036913	153.73	By MS/MS	By MS/MS	By MS/MS		By matching
DPQLVPILIEAAR	FLTTAIRPHGIFGPRDPQLVPILIEAARNG	PRDPQLVPILIEAARNGKMKFVIGNGKNLV	R	D	P	A	R	N	2	1	0	1	0	1	1	0	0	2	2	0	0	0	2	0	0	0	0	1	0	0	13	0	1433.82	Q15738	Q15738	208	220	NSDHL	Sterol-4-alpha-carboxylate 3-dehydrogenase, decarboxylating	yes	yes	2	0.040116	41.283
DQIVDLTVGNNK	QKNYSPYYNTIDDLKDQIVDLTVGNNKTLL	DLKDQIVDLTVGNNKTLLDIDNTRMTLDDF	K	D	Q	N	K	T	0	0	2	2	0	1	0	1	0	1	1	1	0	0	0	0	1	0	0	2	0	0	12	0	1314.68	P35527;CON__P35527	P35527	213	224	KRT9	Keratin, type I cytoskeletal 9	yes	no	2	0.0021546	83
DQSGEVDFK	ENQVPSVRVEIHLPRDQSGEVDFKALVLQL	EIHLPRDQSGEVDFKALVLQLKETSSLQEQ	R	D	Q	F	K	A	0	0	0	2	0	1	1	1	0	0	0	1	0	1	0	1	0	0	0	1	0	0	9	0	1023.45	P46020	P46020	756	764	PHKA1	Phosphorylase b kinase regulatory subunit alpha, skeletal muscle isoform	yes	yes	2	0.0085143	88.948		By matching	By MS/MS
DQVANSAFVER	KENQKHIYYITGETKDQVANSAFVERLRKH	GETKDQVANSAFVERLRKHGLEVIYMIEPI	K	D	Q	E	R	L	2	1	1	1	0	1	1	0	0	0	0	0	0	1	0	1	0	0	0	2	0	0	11	0	1234.59	P07900	P07900	500	510	HSP90AA1	Heat shock protein HSP 90-alpha	yes	yes	2	0.0022574	81.338	By matching
DRDPEAQFEMPYVVR	SSSKLYNEVRACREKDRDPEAQFEMPYVVR	DRDPEAQFEMPYVVRLHNFHQLSAPQPCFT	K	D	R	V	R	L	1	2	0	2	0	1	2	0	0	0	0	0	1	1	2	0	0	0	1	2	0	0	15	1	1850.86	O14744	O14744	491	505	PRMT5	Protein arginine N-methyltransferase 5;Protein arginine N-methyltransferase 5, N-terminally processed	yes	yes	2;3	5.1632e-19	123.76	By matching	By MS/MS	By MS/MS	By MS/MS	By MS/MS
DREVAEGGLPR	SHTQLRGPDSKDSPKDREVAEGGLPRAESP	DSPKDREVAEGGLPRAESPSPAPPPGLRGT	K	D	R	P	R	A	1	2	0	1	0	0	2	2	0	0	1	0	0	0	1	0	0	0	0	1	0	0	11	1	1197.61	Q9BUA3	Q9BUA3	295	305	C11orf84	Uncharacterized protein C11orf84	yes	yes	2;3	4.3196e-06	103.43	By matching		By MS/MS		By matching
DSAYQSITHYRPVSASR	SEEECKDRERPMYGRDSAYQSITHYRPVSA	AYQSITHYRPVSASRSSLDLSYYPTSSSTS	R	D	S	S	R	S	2	2	0	1	0	1	0	0	1	1	0	0	0	0	1	4	1	0	2	1	0	0	17	1	1936.94	P50402	P50402	158	174	EMD	Emerin	yes	yes	4	1.3578e-06	87.148	By matching	By MS/MS	By matching	By matching
DSCQGDSGGPVVCNGQLQGIVSWGYGCAQK	ITGNMICVGFLEGGKDSCQGDSGGPVVCNG	QLQGIVSWGYGCAQKNKPGVYTKVCNYVNW	K	D	S	Q	K	N	1	0	1	2	3	4	0	7	0	1	1	1	0	0	1	3	0	1	1	3	0	0	30	0	3183.38	CON__P00761	CON__P00761	179	208			no	no	3	2.491e-37	112.8				By matching	By matching
DSGNIPEAIASYR	PAFADAHSNLASIHKDSGNIPEAIASYRTA	HKDSGNIPEAIASYRTALKLKPDFPDAYCN	K	D	S	Y	R	T	2	1	1	1	0	0	1	1	0	2	0	0	0	0	1	2	0	0	1	0	0	0	13	0	1391.67	O15294	O15294	441	453	OGT	UDP-N-acetylglucosamine--peptide N-acetylglucosaminyltransferase 110 kDa subunit	yes	yes	2	0.00023644	93.442	By MS/MS		By matching	By MS/MS
DSPKDREVAEGGLPR	LQLFSHTQLRGPDSKDSPKDREVAEGGLPR	DSPKDREVAEGGLPRAESPSPAPPPGLRGT	K	D	S	P	R	A	1	2	0	2	0	0	2	2	0	0	1	1	0	0	2	1	0	0	0	1	0	0	15	2	1624.82	Q9BUA3	Q9BUA3	291	305	C11orf84	Uncharacterized protein C11orf84	yes	yes	3	2.5274e-05	95.57	By matching	By MS/MS			By matching
DSSPHFQAEQR	AAKDSRRPDEGWEARDSSPHFQAEQRVMSR	WEARDSSPHFQAEQRVMSRVHSLERRLEAL	R	D	S	Q	R	V	1	1	0	1	0	2	1	0	1	0	0	0	0	1	1	2	0	0	0	0	0	0	11	0	1300.58	Q9UH99	Q9UH99	265	275	SUN2	SUN domain-containing protein 2	yes	yes	2;3	9.3652e-09	115.29	By MS/MS	By MS/MS	By MS/MS	By MS/MS	By MS/MS
DSTLIMQLLR	DAIAELDTLSEESYKDSTLIMQLLRDNLTL	EESYKDSTLIMQLLRDNLTLWTSDMQGDGE	K	D	S	L	R	D	0	1	0	1	0	1	0	0	0	1	3	0	1	0	0	1	1	0	0	0	0	0	10	0	1188.65	P31947;P61981;P62258;P63104;P31946;P27348;Q04917	P62258	216	225	SFN;YWHAG;YWHAE;YWHAZ;YWHAB;YWHAQ;YWHAH	14-3-3 protein sigma;14-3-3 protein gamma;14-3-3 protein gamma, N-terminally processed;14-3-3 protein epsilon;14-3-3 protein zeta/delta;14-3-3 protein beta/alpha;14-3-3 protein beta/alpha, N-terminally processed;14-3-3 protein theta;14-3-3 protein eta	no	no	2	2.5416e-05	116.73	By MS/MS	By MS/MS	By MS/MS	By MS/MS	By MS/MS
DSVFLSCSEDNR	AHAAQVTCVAASPHKDSVFLSCSEDNRILL	PHKDSVFLSCSEDNRILLWDTRCPKPASQI	K	D	S	N	R	I	0	1	1	2	1	0	1	0	0	0	1	0	0	1	0	3	0	0	0	1	0	0	12	0	1427.6	Q9BQA1	Q9BQA1	180	191	WDR77	Methylosome protein 50	yes	yes	2	1.1719e-60	207.83	By MS/MS	By MS/MS	By MS/MS	By matching	By MS/MS
DSYVGDEAQSK	GRPRHQGVMVGMGQKDSYVGDEAQSKRGIL	MGQKDSYVGDEAQSKRGILTLKYPIEHGIV	K	D	S	S	K	R	1	0	0	2	0	1	1	1	0	0	0	1	0	0	0	2	0	0	1	1	0	0	11	0	1197.52	P63267;P68133;P68032;P62736;P63261;P60709	P63261	51	61	ACTG2;ACTA1;ACTC1;ACTA2;ACTG1;ACTB	Actin, gamma-enteric smooth muscle;Actin, alpha skeletal muscle;Actin, alpha cardiac muscle 1;Actin, aortic smooth muscle;Actin, cytoplasmic 2;Actin, cytoplasmic 2, N-terminally processed;Actin, cytoplasmic 1;Actin, cytoplasmic 1, N-terminally processed	no	no	2	4.6329e-10	138.66	By MS/MS	By matching	By MS/MS	By matching	By MS/MS
DSYVGDEAQSKR	GRPRHQGVMVGMGQKDSYVGDEAQSKRGIL	GQKDSYVGDEAQSKRGILTLKYPIEHGIVT	K	D	S	K	R	G	1	1	0	2	0	1	1	1	0	0	0	1	0	0	0	2	0	0	1	1	0	0	12	1	1353.62	P63267;P68133;P68032;P62736;P63261;P60709	P63261	51	62	ACTG2;ACTA1;ACTC1;ACTA2;ACTG1;ACTB	Actin, gamma-enteric smooth muscle;Actin, alpha skeletal muscle;Actin, alpha cardiac muscle 1;Actin, aortic smooth muscle;Actin, cytoplasmic 2;Actin, cytoplasmic 2, N-terminally processed;Actin, cytoplasmic 1;Actin, cytoplasmic 1, N-terminally processed	no	no	2;3	1.7443e-73	215.87	By MS/MS	By MS/MS	By MS/MS	By MS/MS	By MS/MS
DTGHVYAMK	IGRGAFGEVRLVQKKDTGHVYAMKILRKAD	RLVQKKDTGHVYAMKILRKADMLEKEQVGH	K	D	T	M	K	I	1	0	0	1	0	0	0	1	1	0	0	1	1	0	0	0	1	0	1	1	0	0	9	0	1020.47	Q15208	Q15208	110	118	STK38	Serine/threonine-protein kinase 38	yes	yes	2	5.5318e-16	147.04	By MS/MS
DTGILDSIGR	STMDHARHGFLPRHRDTGILDSIGRFFGGD	LPRHRDTGILDSIGRFFGGDRGAPKRGSGK	R	D	T	G	R	F	0	1	0	2	0	0	0	2	0	2	1	0	0	0	0	1	1	0	0	0	0	0	10	0	1045.54	P02686	P02686	168	177	MBP	Myelin basic protein	yes	yes	2	5.246e-10	154.49	By matching	By matching	By matching	By MS/MS	By matching
DTYIENEKLISGK	SAVEAERLVAGKLKKDTYIENEKLISGKRQ	KKDTYIENEKLISGKRQELVTKIDHILDAL	K	D	T	G	K	R	0	0	1	1	0	0	2	1	0	2	1	2	0	0	0	1	1	0	1	0	0	0	13	1	1508.77	P04843	P04843	580	592	RPN1	Dolichyl-diphosphooligosaccharide--protein glycosyltransferase subunit 1	yes	yes	3	0.002915	67.964	By matching	By MS/MS
DVAGDASESALLK	AVFKGGQDNIPVLKRDVAGDASESALLKCI	KRDVAGDASESALLKCIELSSGSVKLMRER	R	D	V	L	K	C	3	0	0	2	0	0	1	1	0	0	2	1	0	0	0	2	0	0	0	1	0	0	13	0	1274.64	P13637	P13637	436	448	ATP1A3	Sodium/potassium-transporting ATPase subunit alpha-3	yes	yes	2	0.006646	52.79				By matching	By matching
DVDAAYMNKVELEAK	NKRTTAENEFVMLKKDVDAAYMNKVELEAK	DVDAAYMNKVELEAKVDALMDEINFMKMFF	K	D	V	A	K	V	3	0	1	2	0	0	2	0	0	0	1	2	1	0	0	0	0	0	1	2	0	0	15	1	1694.82	CON__P13647;P13647	CON__P13647	278	292	KRT5	Keratin, type II cytoskeletal 5	no	no	3	0.019454	52.823				By matching	By matching
DVDAAYMNKVELQAK	NKRTAAENEFVTLKKDVDAAYMNKVELQAK	DVDAAYMNKVELQAKADTLTDEINFLRALY	K	D	V	A	K	A	3	0	1	2	0	1	1	0	0	0	1	2	1	0	0	0	0	0	1	2	0	0	15	1	1693.83	CON__P02538;P02538;CON__P04259;CON__P48668;P48668;P04259	CON__P04259	273	287	KRT6A;KRT6C;KRT6B	Keratin, type II cytoskeletal 6A;Keratin, type II cytoskeletal 6C;Keratin, type II cytoskeletal 6B	no	no	2;3	4.0226e-05	92.063				By MS/MS
DVDGAYMTK	NKRTNAENEFVTIKKDVDGAYMTKVDLQAK	FVTIKKDVDGAYMTKVDLQAKLDNLQQEID	K	D	V	T	K	V	1	0	0	2	0	0	0	1	0	0	0	1	1	0	0	0	1	0	1	1	0	0	9	0	998.438	P04264;CON__P04264	P04264	290	298	KRT1	Keratin, type II cytoskeletal 1	yes	no	2	0.0091177	85.666	By matching	By MS/MS	By MS/MS	By MS/MS	By MS/MS
DVDGAYMTKVDLQAK	NKRTNAENEFVTIKKDVDGAYMTKVDLQAK	DVDGAYMTKVDLQAKLDNLQQEIDFLTALY	K	D	V	A	K	L	2	0	0	3	0	1	0	1	0	0	1	2	1	0	0	0	1	0	1	2	0	0	15	1	1652.81	P04264;CON__P04264	P04264	290	304	KRT1	Keratin, type II cytoskeletal 1	yes	no	3	0.00018325	86.39		By matching		By MS/MS
DVDNAYMIK	NKRTAAENDFVTLKKDVDNAYMIKVELQSK	FVTLKKDVDNAYMIKVELQSKVDLLNQEIE	K	D	V	I	K	V	1	0	1	2	0	0	0	0	0	1	0	1	1	0	0	0	0	0	1	1	0	0	9	0	1067.5	CON__P35908v2;P35908;CON__P35908	CON__P35908v2	288	296	KRT2	Keratin, type II cytoskeletal 2 epidermal	yes	no	2	0.00067237	134.81		By MS/MS		By MS/MS	By matching
DVLGLQDFER	VLFPFCGGTFHHNEKDVLGLQDFERESVST	HHNEKDVLGLQDFERESVSTSQSRNISLLT	K	D	V	E	R	E	0	1	0	2	0	1	1	1	0	0	2	0	0	1	0	0	0	0	0	1	0	0	10	0	1190.59	Q70YC4	Q70YC4	152	161	ZNF365	Talanin	yes	yes	2	0.0058432	75.213
DVNAAIATIK	YMACCLLYRGDVVPKDVNAAIATIKTKRSI	DVVPKDVNAAIATIKTKRSIQFVDWCPTGF	K	D	V	I	K	T	3	0	1	1	0	0	0	0	0	2	0	1	0	0	0	0	1	0	0	1	0	0	10	0	1014.57	P68363;Q71U36;Q13748;Q6PEY2;Q9BQE3	P68363	327	336	TUBA1B;TUBA1A;TUBA3C;TUBA3E;TUBA1C	Tubulin alpha-1B chain;Tubulin alpha-1A chain;Tubulin alpha-3C/D chain;Tubulin alpha-3E chain;Tubulin alpha-1C chain	no	no	2	0.00056667	99.688	By MS/MS	By MS/MS	By MS/MS	By MS/MS	By MS/MS
DVQIGDIVTVGECRPLSK	KRHKNMSVHLSPCFRDVQIGDIVTVGECRP	IGDIVTVGECRPLSKTVRFNVLKVTKAAGT	R	D	V	S	K	T	0	1	0	2	1	1	1	2	0	2	1	1	0	0	1	1	1	0	0	3	0	0	18	1	1985.03	P62280	P62280	119	136	RPS11	40S ribosomal protein S11	yes	yes	3	1.7252e-08	94.385		By matching	By matching
DWNTLIVGK	RPGPQTRSDLLLSGRDWNTLIVGKLSPWIR	LLLSGRDWNTLIVGKLSPWIRPDSKVEKIR	R	D	W	G	K	L	0	0	1	1	0	0	0	1	0	1	1	1	0	0	0	0	1	1	0	1	0	0	9	0	1044.56	O14744	O14744	77	85	PRMT5	Protein arginine N-methyltransferase 5;Protein arginine N-methyltransferase 5, N-terminally processed	yes	yes	2	4.216e-06	152.63	By MS/MS	By MS/MS	By MS/MS	By MS/MS	By matching
DYDRGYDSR	DRYGGRDRYDDRGSRDYDRGYDSRIGSGRR	DDRGSRDYDRGYDSRIGSGRRAFGSGYRRD	R	D	Y	S	R	I	0	2	0	3	0	0	0	1	0	0	0	0	0	0	0	1	0	0	2	0	0	0	9	1	1145.47	P23588	P23588	265	273	EIF4B	Eukaryotic translation initiation factor 4B	yes	yes	2;3	0.012453	91.853	By matching	By MS/MS	By matching		By matching
DYQELMNTK	DALQQAKEDLARLLRDYQELMNTKLALDLE	LARLLRDYQELMNTKLALDLEIATYRTLLE	R	D	Y	T	K	L	0	0	1	1	0	1	1	0	0	0	1	1	1	0	0	0	1	0	1	0	0	0	9	0	1140.51	P04264;CON__P04264	P04264	464	472	KRT1	Keratin, type II cytoskeletal 1	no	no	2	1.9441e-08	157.68		By matching	By MS/MS	By MS/MS	By matching
DYQELMNVK	EALQQAKEDLARLLRDYQELMNVKLALDVE	LARLLRDYQELMNVKLALDVEIATYRKLLE	R	D	Y	V	K	L	0	0	1	1	0	1	1	0	0	0	1	1	1	0	0	0	0	0	1	1	0	0	9	0	1138.53	CON__P35908v2;P35908;CON__P35908	CON__P35908v2	462	470	KRT2	Keratin, type II cytoskeletal 2 epidermal	no	no	2	0.002874	107.59				By MS/MS	By MS/MS
DYSKYYK	EWYEKHGNSHQGEPRDYSKYYKTIDDLKNQ	NSHQGEPRDYSKYYKTIDDLKNQILNLTTD	R	D	Y	Y	K	T	0	0	0	1	0	0	0	0	0	0	0	2	0	0	0	1	0	0	3	0	0	0	7	1	965.449	P13645;CON__P13645;CON__P02535-1	P13645	195	201	KRT10	Keratin, type I cytoskeletal 10	yes	no	2;3	0.013081	108.24	By matching	By matching		By MS/MS	By matching
EAAASLSLTLQK	KILTHVAEMQGKSAREAAASLSLTLQKEGV	SAREAAASLSLTLQKEGVIGVTEEQVHHIV	R	E	A	Q	K	E	3	0	0	0	0	1	1	0	0	0	3	1	0	0	0	2	1	0	0	0	0	0	12	0	1230.68	Q9UH99	Q9UH99	506	517	SUN2	SUN domain-containing protein 2	yes	yes	2	2.3038e-14	150.35	By MS/MS	By MS/MS	By MS/MS	By MS/MS
EAADAELGQLR	VGILSRRLQEALAAKEAADAELGQLRAQGG	LAAKEAADAELGQLRAQGGSSDSSLALHER	K	E	A	L	R	A	3	1	0	1	0	1	2	1	0	0	2	0	0	0	0	0	0	0	0	0	0	0	11	0	1171.58	Q08378	Q08378	1018	1028	GOLGA3	Golgin subfamily A member 3	yes	yes	2	2.1546e-10	143.04	By MS/MS	By MS/MS	By MS/MS	By MS/MS	By matching
EAADPLASK	FQLSLLAAMGNTQRKEAADPLASKLNKVTQ	GNTQRKEAADPLASKLNKVTQLTGFSDPVY	K	E	A	S	K	L	3	0	0	1	0	0	1	0	0	0	1	1	0	0	1	1	0	0	0	0	0	0	9	0	900.455	P53618	P53618	704	712	COPB1	Coatomer subunit beta	yes	yes	2	0.0086051	88.819	By MS/MS				By matching
EAAENSLVAYK	YHRYLAEFATGNDRKEAAENSLVAYKAASD	NDRKEAAENSLVAYKAASDIAMTELPPTHP	K	E	A	Y	K	A	3	0	1	0	0	0	2	0	0	0	1	1	0	0	0	1	0	0	1	1	0	0	11	0	1193.59	P62258	P62258	143	153	YWHAE	14-3-3 protein epsilon	yes	yes	2	3.749e-08	122.13		By MS/MS	By matching		By matching
EAAEQDVEK	RANARLFGIRAKRAKEAAEQDVEKKK____	RAKRAKEAAEQDVEKKK_____________	K	E	A	E	K	K	2	0	0	1	0	1	3	0	0	0	0	1	0	0	0	0	0	0	0	1	0	0	9	0	1017.46	P26373	P26373	201	209	RPL13	60S ribosomal protein L13	yes	yes	2	0.031837	67.169
EAAEQDVEKKK	RANARLFGIRAKRAKEAAEQDVEKKK____	KRAKEAAEQDVEKKK_______________	K	E	A	K	K	-	2	0	0	1	0	1	3	0	0	0	0	3	0	0	0	0	0	0	0	1	0	0	11	2	1273.65	P26373	P26373	201	211	RPL13	60S ribosomal protein L13	yes	yes	3	0.00012069	88.441		By MS/MS
EAALKEDFRR	HEDTLALLEGLVSRREAALKEDFRRETAAR	LVSRREAALKEDFRRETAARIQEELSALRA	R	E	A	R	R	E	2	2	0	1	0	0	2	0	0	0	1	1	0	1	0	0	0	0	0	0	0	0	10	2	1233.65	Q9UH99	Q9UH99	340	349	SUN2	SUN domain-containing protein 2	yes	yes	3	2.0044e-05	131.82	By MS/MS	By MS/MS	By MS/MS	By matching	By MS/MS
EAESCDCLQGFQLTHSLGGGTGSGMGTLLLSK	EGAELMESVMDVVRKEAESCDCLQGFQLTH	GGGTGSGMGTLLLSKIREEYPDRIINTFSI	K	E	A	S	K	I	1	0	0	1	2	2	2	7	1	0	6	1	1	1	0	4	3	0	0	0	0	0	32	0	3310.53	Q3ZCM7	Q3ZCM7	123	154	TUBB8	Tubulin beta-8 chain	yes	yes	3	1.3056e-55	128.43	By MS/MS	By matching
EAFNEFQK	ELEFQDKVDLDRLVKEAFNEFQKDQSRLKE	DLDRLVKEAFNEFQKDQSRLKEIEKQDDMT	K	E	A	Q	K	D	1	0	1	0	0	1	2	0	0	0	0	1	0	2	0	0	0	0	0	0	0	0	8	0	1011.47	Q93100	Q93100	1030	1037	PHKB	Phosphorylase b kinase regulatory subunit beta	yes	yes	2	0.0065272	113.14	By matching	By MS/MS	By MS/MS	By MS/MS	By matching
EAFNEFQKDQSR	ELEFQDKVDLDRLVKEAFNEFQKDQSRLKE	LVKEAFNEFQKDQSRLKEIEKQDDMTSFYN	K	E	A	S	R	L	1	1	1	1	0	2	2	0	0	0	0	1	0	2	0	1	0	0	0	0	0	0	12	1	1497.68	Q93100	Q93100	1030	1041	PHKB	Phosphorylase b kinase regulatory subunit beta	yes	yes	3	0.00098654	82.543	By matching	By MS/MS
EAFQLFDR	______________________________	DQTAEFKEAFQLFDRTGDGKILYSQCGDVM	K	E	A	D	R	T	1	1	0	1	0	1	1	0	0	0	1	0	0	2	0	0	0	0	0	0	0	0	8	0	1024.5	P60660	P60660	14	21	MYL6	Myosin light polypeptide 6	yes	yes	2	0.0087678	109.01			By MS/MS	By MS/MS
EAINVEQAFQTIAR	CYSKNNIPYFETSAKEAINVEQAFQTIARN	KEAINVEQAFQTIARNALKQETEVELYNEF	K	E	A	A	R	N	3	1	1	0	0	2	2	0	0	2	0	0	0	1	0	0	1	0	0	1	0	0	14	0	1588.82	P51149	P51149	158	171	RAB7A	Ras-related protein Rab-7a	yes	yes	2	5.8701e-27	159.94	By matching	By matching	By MS/MS		By matching
EALEAVLIK	DGVFSGNAEQVQEYKEALEAVLIKGKNGVP	QVQEYKEALEAVLIKGKNGVPLLPELYSVP	K	E	A	I	K	G	2	0	0	0	0	0	2	0	0	1	2	1	0	0	0	0	0	0	0	1	0	0	9	0	984.586	P46020	P46020	353	361	PHKA1	Phosphorylase b kinase regulatory subunit alpha, skeletal muscle isoform	yes	yes	2	0.0046271	98.997	By MS/MS	By matching	By MS/MS	By MS/MS
EALQSLR	LRKSQGTSAEGSVRKEALQSLRLSLPMQET	SAEGSVRKEALQSLRLSLPMQETQLCSTDS	K	E	A	L	R	L	1	1	0	0	0	1	1	0	0	0	2	0	0	0	0	1	0	0	0	0	0	0	7	0	815.45	Q08378	Q08378	119	125	GOLGA3	Golgin subfamily A member 3	yes	yes	2	0.021871	100.74	By matching	By MS/MS			By matching
EAMNSICQTALSADGK	LESQVAQLKNSSEEKEAMNSICQTALSADG	AMNSICQTALSADGKGSKGSEEDVVSKNQG	K	E	A	G	K	G	3	0	1	1	1	1	1	1	0	1	1	1	1	0	0	2	1	0	0	0	0	0	16	0	1694.76	Q5W0B1	Q5W0B1	265	280	RNF219	RING finger protein 219	yes	yes	2	6.8035e-06	90.731			By MS/MS	By matching
EANQQQQFNR	KKLLEATELKGIKLREANQQQQFNRNVEDI	GIKLREANQQQQFNRNVEDIELWLYEVEGH	R	E	A	N	R	N	1	1	2	0	0	4	1	0	0	0	0	0	0	1	0	0	0	0	0	0	0	0	10	0	1261.58	Q13813	Q13813	676	685	SPTAN1	Spectrin alpha chain, non-erythrocytic 1	yes	yes	2	2.7842e-14	136.16		By MS/MS
EAPVDVLTQIGR	AQSRRDFAPPGQQKREAPVDVLTQIGRSVR	QKREAPVDVLTQIGRSVRGTLDAWIGPETM	R	E	A	G	R	S	1	1	0	1	0	1	1	1	0	1	1	0	0	0	1	0	1	0	0	2	0	0	12	0	1296.7	Q9BVC6	Q9BVC6	48	59	TMEM109	Transmembrane protein 109	yes	yes	2	3.3873e-14	147.75	By MS/MS	By MS/MS	By matching	By matching
EAQVNVR	KGDFPTGKSSFSITREAQVNVRMDSFDEDL	KSSFSITREAQVNVRMDSFDEDLARPSGLL	R	E	A	V	R	M	1	1	1	0	0	1	1	0	0	0	0	0	0	0	0	0	0	0	0	2	0	0	7	0	814.43	Q9Y2W1	Q9Y2W1	566	572	THRAP3	Thyroid hormone receptor-associated protein 3	yes	yes	2	0.036104	93.593	By matching	By matching	By matching	By matching
EATAGNPGGQTVR	SDMELLFDIFLETVKEATAGNPGGQTVRER	VKEATAGNPGGQTVRERLTERLCPPGIPTP	K	E	A	V	R	E	2	1	1	0	0	1	1	3	0	0	0	0	0	0	1	0	2	0	0	1	0	0	13	0	1256.61	P27708	P27708	359	371	CAD	CAD protein;Glutamine-dependent carbamoyl-phosphate synthase;Aspartate carbamoyltransferase;Dihydroorotase	yes	yes	2	0.0453	52.725			By MS/MS	By matching
EAVELPLTHFELYK	YADIGGMDIQKQEVREAVELPLTHFELYKQ	REAVELPLTHFELYKQIGIDPPRGVLMYGP	R	E	A	Y	K	Q	1	0	0	0	0	0	3	0	1	0	3	1	0	1	1	0	1	0	1	1	0	0	14	0	1687.88	P43686	P43686	179	192	PSMC4	26S protease regulatory subunit 6B	yes	yes	3	0.051421	44.436
EAWDLGVCR	FHSGKHYWEVDVTGKEAWDLGVCRDSVRRK	VDVTGKEAWDLGVCRDSVRRKGHFLLSSKS	K	E	A	C	R	D	1	1	0	1	1	0	1	1	0	0	1	0	0	0	0	0	0	1	0	1	0	0	9	0	1104.5	P19474	P19474	352	360	TRIM21	E3 ubiquitin-protein ligase TRIM21	yes	yes	2	0.017452	75.109	By matching		By MS/MS	By matching
EDAANNYAR	TYRQLFHPEQLITGKEDAANNYARGHYTIG	QLITGKEDAANNYARGHYTIGKEIIDLVLD	K	E	D	A	R	G	3	1	2	1	0	0	1	0	0	0	0	0	0	0	0	0	0	0	1	0	0	0	9	0	1022.44	P68363;P68366;A6NHL2;Q71U36;Q13748;Q9NY65;Q9BQE3	P68363	97	105	TUBA1B;TUBA4A;TUBAL3;TUBA1A;TUBA3C;TUBA8;TUBA1C	Tubulin alpha-1B chain;Tubulin alpha-4A chain;Tubulin alpha chain-like 3;Tubulin alpha-1A chain;Tubulin alpha-3C/D chain;Tubulin alpha-8 chain;Tubulin alpha-1C chain	no	no	2	6.7697e-05	143.85	By MS/MS	By MS/MS	By MS/MS	By MS/MS	By MS/MS
EDGNEEDKENQGDETQGQQPPQRR	RPRFRRGPPRQRQPREDGNEEDKENQGDET	NQGDETQGQQPPQRRYRRNFNYRRRRPENP	R	E	D	R	R	Y	0	2	2	3	0	5	5	3	0	0	0	1	0	0	2	0	1	0	0	0	0	0	24	2	2783.2	P67809	P67809	257	280	YBX1	Nuclease-sensitive element-binding protein 1	yes	yes	4	1.6919e-05	70.76		By matching	By MS/MS
EEDRPPLR	YATQSALSSSRPTKKEEDRPPLRGFLLDGD	SSRPTKKEEDRPPLRGFLLDGDFFVAASLA	K	E	E	L	R	G	0	2	0	1	0	0	2	0	0	0	1	0	0	0	2	0	0	0	0	0	0	0	8	1	1010.51	P53618	P53618	536	543	COPB1	Coatomer subunit beta	yes	yes	3	0.050618	31.074	By matching	By MS/MS	By matching	By matching	By matching
EEEIAALVIDNGSGMCK	______________________________	EIAALVIDNGSGMCKAGFAGDDAPRAVFPS	M	E	E	C	K	A	2	0	1	1	1	0	3	2	0	2	1	1	1	0	0	1	0	0	0	1	0	0	17	0	1834.84	P63261	P63261	2	18	ACTG1	Actin, cytoplasmic 2;Actin, cytoplasmic 2, N-terminally processed	yes	yes	2	8.8189e-39	116.01
EEMQAQLR	FLARGGGGRVGLLQREEMQAQLRELESKIL	RVGLLQREEMQAQLRELESKILTHVAEMQG	R	E	E	L	R	E	1	1	0	0	0	2	2	0	0	0	1	0	1	0	0	0	0	0	0	0	0	0	8	0	1003.48	Q9UH99	Q9UH99	479	486	SUN2	SUN domain-containing protein 2	yes	yes	2	0.0033966	124.89	By MS/MS	By MS/MS		By MS/MS	By MS/MS
EEQFNSTFR	YVDGVEVHNAKTKPREEQFNSTFRVVSVLT	AKTKPREEQFNSTFRVVSVLTVVHQDWLNG	R	E	E	F	R	V	0	1	1	0	0	1	2	0	0	0	0	0	0	2	0	1	1	0	0	0	0	0	9	0	1156.51	P01859	P01859	172	180	IGHG2	Ig gamma-2 chain C region	yes	yes	2	1.0403e-12	170.22	By MS/MS	By MS/MS	By MS/MS	By MS/MS	By MS/MS
EFADSLGIPFLETSAK	CDLTTKKVVDYTTAKEFADSLGIPFLETSA	FADSLGIPFLETSAKNATNVEQSFMTMAAE	K	E	F	A	K	N	2	0	0	1	0	0	2	1	0	1	2	1	0	2	1	2	1	0	0	0	0	0	16	0	1723.87	P62820;Q9H0U4;Q92928	P62820	141	156	RAB1A;RAB1B;RAB1C	Ras-related protein Rab-1A;Ras-related protein Rab-1B;Putative Ras-related protein Rab-1C	yes	no	2	1.9566e-28	130.01			By MS/MS	By MS/MS
EFIQEPAK	FDFLCMPVFHPRFKREFIQEPAKNRPGPQT	FHPRFKREFIQEPAKNRPGPQTRSDLLLSG	R	E	F	A	K	N	1	0	0	0	0	1	2	0	0	1	0	1	0	1	1	0	0	0	0	0	0	0	8	0	960.492	O14744	O14744	53	60	PRMT5	Protein arginine N-methyltransferase 5;Protein arginine N-methyltransferase 5, N-terminally processed	yes	yes	2	0.0041772	128.57	By MS/MS	By MS/MS	By MS/MS	By MS/MS
EFIQEPAKNRPGPQTR	FDFLCMPVFHPRFKREFIQEPAKNRPGPQT	FIQEPAKNRPGPQTRSDLLLSGRDWNTLIV	R	E	F	T	R	S	1	2	1	0	0	2	2	1	0	1	0	1	0	1	3	0	1	0	0	0	0	0	16	2	1866.97	O14744	O14744	53	68	PRMT5	Protein arginine N-methyltransferase 5;Protein arginine N-methyltransferase 5, N-terminally processed	yes	yes	3;4	2.0602e-31	140.74	By MS/MS	By MS/MS
EFSPFGSITSAK	IKNLDDTIDDEKLRKEFSPFGSITSAKVML	LRKEFSPFGSITSAKVMLEDGRSKGFGFVC	K	E	F	A	K	V	1	0	0	0	0	0	1	1	0	1	0	1	0	2	1	3	1	0	0	0	0	0	12	0	1269.62	Q13310	Q13310	313	324	PABPC4	Polyadenylate-binding protein 4	yes	yes	2	0.0022126	83	By matching			By matching
EFSPFGTITSAK	VKNLDDGIDDERLRKEFSPFGTITSAKVMM	LRKEFSPFGTITSAKVMMEGGRSKGFGFVC	K	E	F	A	K	V	1	0	0	0	0	0	1	1	0	1	0	1	0	2	1	2	2	0	0	0	0	0	12	0	1283.64	P11940	P11940	313	324	PABPC1	Polyadenylate-binding protein 1	yes	yes	2	0.00048548	92.538
EFTEAVEAK	LILDDVSLTHLTFGKEFTEAVEAKQVAQQE	HLTFGKEFTEAVEAKQVAQQEAERARFVVE	K	E	F	A	K	Q	2	0	0	0	0	0	3	0	0	0	0	1	0	1	0	0	1	0	0	1	0	0	9	0	1022.49	P35232	P35232	178	186	PHB	Prohibitin	yes	yes	2	0.023862	71.379			By MS/MS
EGALCEENMR	EIKDSVVAGFQWATKEGALCEENMRGVRFD	QWATKEGALCEENMRGVRFDVHDVTLHADA	K	E	G	M	R	G	1	1	1	0	1	0	3	1	0	0	1	0	1	0	0	0	0	0	0	0	0	0	10	0	1207.5	P13639	P13639	689	698	EEF2	Elongation factor 2	yes	yes	2	8.4586e-08	110.87		By MS/MS
EGGQIAVFDATNTTR	CALAALRDVKSYLAKEGGQIAVFDATNTTR	EGGQIAVFDATNTTRERRHMILHFAKENDF	K	E	G	T	R	E	2	1	1	1	0	1	1	2	0	1	0	0	0	1	0	0	3	0	0	1	0	0	15	0	1578.76	Q16875	Q16875	117	131	PFKFB3	6-phosphofructo-2-kinase/fructose-2,6-bisphosphatase 3;6-phosphofructo-2-kinase;Fructose-2,6-bisphosphatase	yes	yes	2	7.1822e-07	78.653	By MS/MS	By MS/MS	By MS/MS	By MS/MS
EGIDSECGPFIK	LVHGNVCTKNLLLAREGIDSECGPFIKLSD	LAREGIDSECGPFIKLSDPGIPITVLSRQE	R	E	G	I	K	L	0	0	0	1	1	0	2	2	0	2	0	1	0	1	1	1	0	0	0	0	0	0	12	0	1350.61	P23458	P23458	725	736	JAK1	Tyrosine-protein kinase JAK1	yes	yes	2	3.1922e-06	103.7	By MS/MS	By MS/MS		By MS/MS
EGPNFITK	CLASQAILLGILLKREGPNFITKEGTVSDH	LGILLKREGPNFITKEGTVSDHIERVYRRA	R	E	G	T	K	E	0	0	1	0	0	0	1	1	0	1	0	1	0	1	1	0	1	0	0	0	0	0	8	0	904.465	Q93100	Q93100	751	758	PHKB	Phosphorylase b kinase regulatory subunit beta	yes	yes	2	0.034245	84.568	By MS/MS	By MS/MS	By MS/MS	By MS/MS
EGQNYQQNCIK	IINIMQDRLKACQQREGQNYQQNCIKEVEQ	CQQREGQNYQQNCIKEVEQFTQVAKAYQDR	R	E	G	I	K	E	0	0	2	0	1	3	1	1	0	1	0	1	0	0	0	0	0	0	1	0	0	0	11	0	1380.61	O96000	O96000	111	121	NDUFB10	NADH dehydrogenase [ubiquinone] 1 beta subcomplex subunit 10	yes	yes	2	0.002902	73.931
EGQTICVR	WFPILFPIKQPITVREGQTICVRFWRCSNS	KQPITVREGQTICVRFWRCSNSKKVWYEWA	R	E	G	V	R	F	0	1	0	0	1	1	1	1	0	1	0	0	0	0	0	0	1	0	0	1	0	0	8	0	961.465	O14744	O14744	594	601	PRMT5	Protein arginine N-methyltransferase 5;Protein arginine N-methyltransferase 5, N-terminally processed	yes	yes	2	0.0014023	147.52	By MS/MS	By MS/MS	By matching	By matching	By MS/MS
EGRPSGEAFVELESEDEVK	KIQNGAQGIRFIYTREGRPSGEAFVELESE	SGEAFVELESEDEVKLALKKDRETMGHRYV	R	E	G	V	K	L	1	1	0	1	0	0	6	2	0	0	1	1	0	1	1	2	0	0	0	2	0	0	19	1	2105.98	P31943	P31943	50	68	HNRNPH1	Heterogeneous nuclear ribonucleoprotein H;Heterogeneous nuclear ribonucleoprotein H, N-terminally processed	yes	yes	3	0.00026584	52.045
EGTVSDHIER	LGILLKREGPNFITKEGTVSDHIERVYRRA	NFITKEGTVSDHIERVYRRAGSQKLWLAVR	K	E	G	E	R	V	0	1	0	1	0	0	2	1	1	1	0	0	0	0	0	1	1	0	0	1	0	0	10	0	1141.54	Q93100	Q93100	759	768	PHKB	Phosphorylase b kinase regulatory subunit beta	yes	yes	2;3	2.8947e-12	158.76	By MS/MS	By MS/MS	By MS/MS	By MS/MS	By MS/MS
EGVIGVTEEQVHHIVK	SAREAAASLSLTLQKEGVIGVTEEQVHHIV	GVIGVTEEQVHHIVKQALQRYSEDRIGLAD	K	E	G	V	K	Q	0	0	0	0	0	1	3	2	2	2	0	1	0	0	0	0	1	0	0	4	0	0	16	0	1772.94	Q9UH99	Q9UH99	518	533	SUN2	SUN domain-containing protein 2	yes	yes	3	1.2023e-29	135.02	By MS/MS	By MS/MS	By matching	By MS/MS	By matching
EHALLAYTLGVK	VGEFEAGISKNGQTREHALLAYTLGVKQLI	QTREHALLAYTLGVKQLIVGVNKMDSTEPP	R	E	H	V	K	Q	2	0	0	0	0	0	1	1	1	0	3	1	0	0	0	0	1	0	1	1	0	0	12	0	1313.73	P68104;Q5VTE0;Q05639	P68104	135	146	EEF1A1;EEF1A1P5;EEF1A2	Elongation factor 1-alpha 1;Putative elongation factor 1-alpha-like 3;Elongation factor 1-alpha 2	yes	no	2;3	1.3906e-14	152.54	By MS/MS	By MS/MS	By MS/MS	By MS/MS	By MS/MS
EHALTSGTIK	VKLISSDGHEFIVKREHALTSGTIKAMLSG	FIVKREHALTSGTIKAMLSGPGQFAENETN	R	E	H	I	K	A	1	0	0	0	0	0	1	1	1	1	1	1	0	0	0	1	2	0	0	0	0	0	10	0	1055.56	Q15369	Q15369	34	43	TCEB1	Transcription elongation factor B polypeptide 1	yes	yes	2	2.3876e-05	133.13	By matching	By MS/MS	By matching	By matching	By matching
EHDPVGQMVNNPK	GYQTAFSQLAFAGKKEHDPVGQMVNNPKIH	KKEHDPVGQMVNNPKIHLAQSLHKLSTACP	K	E	H	P	K	I	0	0	2	1	0	1	1	1	1	0	0	1	1	0	2	0	0	0	0	2	0	0	13	0	1463.68	P55060	P55060	913	925	CSE1L	Exportin-2	yes	yes	3	0.0010221	68.676		By matching
EHHFGSSGMTLHER	ELFAQHIVTIVHHVKEHHFGSSGMTLHERF	KEHHFGSSGMTLHERFTKYLKRGTEQEAAK	K	E	H	E	R	F	0	1	0	0	0	0	2	2	3	0	1	0	1	1	0	2	1	0	0	0	0	0	14	0	1623.72	Q9Y2W1	Q9Y2W1	640	653	THRAP3	Thyroid hormone receptor-associated protein 3	yes	yes	4	0.0092088	54.898	By matching	By MS/MS		By matching	By matching
EHTAYYIK	EVESMGAHLNAYSTREHTAYYIKALSKDLP	LNAYSTREHTAYYIKALSKDLPKAVELLGD	R	E	H	I	K	A	1	0	0	0	0	0	1	0	1	1	0	1	0	0	0	0	1	0	2	0	0	0	8	0	1023.5	P31930	P31930	127	134	UQCRC1	Cytochrome b-c1 complex subunit 1, mitochondrial	yes	yes	3	0.0029799	91.9	By MS/MS	By MS/MS	By MS/MS		By matching
EIAEAYLGK	FYPEEVSSMVLTKMKEIAEAYLGKTVTNAV	VLTKMKEIAEAYLGKTVTNAVVTVPAYFND	K	E	I	G	K	T	2	0	0	0	0	0	2	1	0	1	1	1	0	0	0	0	0	0	1	0	0	0	9	0	992.518	P11142	P11142	129	137	HSPA8	Heat shock cognate 71 kDa protein	yes	yes	2	0.042342	63.48	By matching	By matching	By matching	By matching	By matching
EIAQDFK	TELLIRKLPFQRLVREIAQDFKTDLRFQSS	LPFQRLVREIAQDFKTDLRFQSSAVMALQE	R	E	I	F	K	T	1	0	0	1	0	1	1	0	0	1	0	1	0	1	0	0	0	0	0	0	0	0	7	0	849.423	Q71DI3;Q16695;P84243;P68431	Q71DI3	74	80	HIST2H3A;HIST3H3;H3F3A;HIST1H3A	Histone H3.2;Histone H3.1t;Histone H3.3;Histone H3.1	yes	no	2	0.016218	110.34
EIETYHNLLEGGQEDFESSGAGK	QEYSLLLSIKMRLEKEIETYHNLLEGGQED	LEGGQEDFESSGAGKIGLGGRGGSGGSYGR	K	E	I	G	K	I	1	0	1	1	0	1	5	4	1	1	2	1	0	1	0	2	1	0	1	0	0	0	23	0	2509.12	P35527;CON__P35527	P35527	450	472	KRT9	Keratin, type I cytoskeletal 9	yes	no	3	1.7648e-263	268.09		By matching	By MS/MS	By MS/MS	By MS/MS
EIIDLVLDR	DAANNYARGHYTIGKEIIDLVLDRIRKLAD	HYTIGKEIIDLVLDRIRKLADQCTGLQGFL	K	E	I	D	R	I	0	1	0	2	0	0	1	0	0	2	2	0	0	0	0	0	0	0	0	1	0	0	9	0	1084.61	P68363;Q71U36;Q9BQE3	P68363	113	121	TUBA1B;TUBA1A;TUBA1C	Tubulin alpha-1B chain;Tubulin alpha-1A chain;Tubulin alpha-1C chain	no	no	2	3.6435e-06	153.08	By matching	By MS/MS	By MS/MS	By MS/MS	By MS/MS
EIIGGTSESEPMLSHTVR	CPACRVPITPENPCKEIIGGTSESEPMLSH	GGTSESEPMLSHTVRKHLRKTRLELLHKEY	K	E	I	V	R	K	0	1	0	0	0	0	3	2	1	2	1	0	1	0	1	3	2	0	0	1	0	0	18	0	1941.95	Q5W0B1	Q5W0B1	67	84	RNF219	RING finger protein 219	yes	yes	3	4.6966e-13	110.22	By MS/MS	By MS/MS	By MS/MS	By matching	By MS/MS
EIIGGTSESEPMLSHTVRK	CPACRVPITPENPCKEIIGGTSESEPMLSH	GTSESEPMLSHTVRKHLRKTRLELLHKEYE	K	E	I	R	K	H	0	1	0	0	0	0	3	2	1	2	1	1	1	0	1	3	2	0	0	1	0	0	19	1	2070.04	Q5W0B1	Q5W0B1	67	85	RNF219	RING finger protein 219	yes	yes	3	5.8769e-05	53.779	By MS/MS
EILGTAQSVGCNVDGR	MRHRSLARELSGTIKEILGTAQSVGCNVDG	ILGTAQSVGCNVDGRHPHDIIDDINSGAVE	K	E	I	G	R	H	1	1	1	1	1	1	1	3	0	1	1	0	0	0	0	1	1	0	0	2	0	0	16	0	1674.8	P30050	P30050	131	146	RPL12	60S ribosomal protein L12	yes	yes	2	0.00061127	78.692
EIQTAVR	SRLAHYNKRSTITSREIQTAVRLLLPGELA	KRSTITSREIQTAVRLLLPGELAKHAVSEG	R	E	I	V	R	L	1	1	0	0	0	1	1	0	0	1	0	0	0	0	0	0	1	0	0	1	0	0	7	0	815.45	Q99880;Q99879;Q99877;Q93079;Q5QNW6;P62807;P58876;P57053;O60814;Q96A08;Q16778;P33778;P23527;P06899	Q99880	94	100	HIST1H2BL;HIST1H2BM;HIST1H2BN;HIST1H2BH;HIST2H2BF;HIST1H2BC;HIST1H2BD;H2BFS;HIST1H2BK;HIST1H2BA;HIST2H2BE;HIST1H2BB;HIST1H2BO;HIST1H2BJ	Histone H2B type 1-L;Histone H2B type 1-M;Histone H2B type 1-N;Histone H2B type 1-H;Histone H2B type 2-F;Histone H2B type 1-C/E/F/G/I;Histone H2B type 1-D;Histone H2B type F-S;Histone H2B type 1-K;Histone H2B type 1-A;Histone H2B type 2-E;Histone H2B type 1-B;Histone H2B type 1-O;Histone H2B type 1-J	no	no	2	0.022535	97.071		By MS/MS
EIQVQHPAAK	MGGIVMTNDGNAILREIQVQHPAAKSMIEI	NAILREIQVQHPAAKSMIEISRTQDEEVGD	R	E	I	A	K	S	2	0	0	0	0	2	1	0	1	1	0	1	0	0	1	0	0	0	0	1	0	0	10	0	1119.6	P49368	P49368	69	78	CCT3	T-complex protein 1 subunit gamma	yes	yes	2;3	0.0012114	94.302		By MS/MS	By matching
EISNLLVATK	NISFMLKRCCQPKPREISNLLVATKKAQEW	QPKPREISNLLVATKKAQEWQPVYPMSQLS	R	E	I	T	K	K	1	0	1	0	0	0	1	0	0	1	2	1	0	0	0	1	1	0	0	1	0	0	10	0	1086.63	P23458	P23458	550	559	JAK1	Tyrosine-protein kinase JAK1	yes	yes	2	0.0049241	78.264	By matching	By MS/MS	By MS/MS	By MS/MS	By MS/MS
EITALAPSTMK	GGTTMYPGIADRMQKEITALAPSTMKIKII	RMQKEITALAPSTMKIKIIAPPERKYSVWI	K	E	I	M	K	I	2	0	0	0	0	0	1	0	0	1	1	1	1	0	1	1	2	0	0	0	0	0	11	0	1160.61	P63267;P68133;P68032;P62736;P63261;P60709	P63261	316	326	ACTG2;ACTA1;ACTC1;ACTA2;ACTG1;ACTB	Actin, gamma-enteric smooth muscle;Actin, alpha skeletal muscle;Actin, alpha cardiac muscle 1;Actin, aortic smooth muscle;Actin, cytoplasmic 2;Actin, cytoplasmic 2, N-terminally processed;Actin, cytoplasmic 1;Actin, cytoplasmic 1, N-terminally processed	no	no	2	5.0564e-08	116.52	By MS/MS	By MS/MS	By MS/MS	By MS/MS	By MS/MS
EIVHLQAGQCGNQIGAK	______________________________	VHLQAGQCGNQIGAKFWEVISDEHGIDPTG	R	E	I	A	K	F	2	0	1	0	1	3	1	3	1	2	1	1	0	0	0	0	0	0	0	1	0	0	17	0	1821.92	P68371;P04350	P68371	3	19	TUBB4B;TUBB4A	Tubulin beta-4B chain;Tubulin beta-4A chain	no	no	3	3.0268e-32	140.03	By MS/MS	By MS/MS	By MS/MS		By MS/MS
EIVRDIKEK	ILTERGYSFTTTAEREIVRDIKEKLCYVAL	TTTAEREIVRDIKEKLCYVALDFEQEMATA	R	E	I	E	K	L	0	1	0	1	0	0	2	0	0	2	0	2	0	0	0	0	0	0	0	1	0	0	9	2	1128.65	P63267;P68133;P68032;P62736;P63261;P60709;Q6S8J3;A5A3E0;P0CG38;P0CG39	P63261	207	215	ACTG2;ACTA1;ACTC1;ACTA2;ACTG1;ACTB;POTEE;POTEF;POTEI;POTEJ	Actin, gamma-enteric smooth muscle;Actin, alpha skeletal muscle;Actin, alpha cardiac muscle 1;Actin, aortic smooth muscle;Actin, cytoplasmic 2;Actin, cytoplasmic 2, N-terminally processed;Actin, cytoplasmic 1;Actin, cytoplasmic 1, N-terminally processed;POTE ankyrin domain family member E;POTE ankyrin domain family member F;POTE ankyrin domain family member I;POTE ankyrin domain family member J	no	no	3	0.00086166	130.98		By MS/MS
EKDRDPEAQFEMPYVVR	PISSSKLYNEVRACREKDRDPEAQFEMPYV	DRDPEAQFEMPYVVRLHNFHQLSAPQPCFT	R	E	K	V	R	L	1	2	0	2	0	1	3	0	0	0	0	1	1	1	2	0	0	0	1	2	0	0	17	2	2108	O14744	O14744	489	505	PRMT5	Protein arginine N-methyltransferase 5;Protein arginine N-methyltransferase 5, N-terminally processed	yes	yes	3;4	1.4374e-67	184.99	By MS/MS	By MS/MS	By MS/MS	By MS/MS	By MS/MS
EKGSSASLVLKR	IVSHPADSVVSVLNKEKGSSASLVLKRLGF	LNKEKGSSASLVLKRLGFKGVWKGLFARII	K	E	K	K	R	L	1	1	0	0	0	0	1	1	0	0	2	2	0	0	0	3	0	0	0	1	0	0	12	2	1273.74	Q00325	Q00325	294	305	SLC25A3	Phosphate carrier protein, mitochondrial	yes	yes	3	0.005275	65.563	By matching	By MS/MS
EKIEAVATELNVDCEIVR	KYWDNGMTSLGSVCREKIEAVATELNVDCE	EAVATELNVDCEIVRTWIGNRRRKYRLMGI	R	E	K	V	R	T	2	1	1	1	1	0	4	0	0	2	1	1	0	0	0	0	1	0	0	3	0	0	18	1	2087.06	Q7Z353	Q7Z353	467	484	HDX	Highly divergent homeobox	yes	yes	3	8.7732e-33	138.66	By MS/MS	By matching	By matching
EKLEAEMEAAR	KQQREQVDRNIREAKEKLEAEMEAARHEHQ	REAKEKLEAEMEAARHEHQLMLMRQDLMRR	K	E	K	A	R	H	3	1	0	0	0	0	4	0	0	0	1	1	1	0	0	0	0	0	0	0	0	0	11	1	1275.61	Q8WXF1	Q8WXF1	302	312	PSPC1	Paraspeckle component 1	yes	yes	3	0.0043987	67.214			By MS/MS
EKYEAIVEENKK	NPEIELLRLELAEMKEKYEAIVEENKKLKA	EMKEKYEAIVEENKKLKAKLAQYEPPQEEK	K	E	K	K	K	L	1	0	1	0	0	0	4	0	0	1	0	3	0	0	0	0	0	0	1	1	0	0	12	2	1478.76	Q99417	Q99417	74	85	MYCBP	C-Myc-binding protein	yes	yes	2;3	2.5038e-89	220.1	By matching	By MS/MS	By MS/MS	By MS/MS	By MS/MS
EKYGIPEPPEPK	DMEQMKYRDRAAERREKYGIPEPPEPKRRK	ERREKYGIPEPPEPKRRKYGGISTASVDFE	R	E	K	P	K	R	0	0	0	0	0	0	3	1	0	1	0	2	0	0	4	0	0	0	1	0	0	0	12	1	1382.71	P98175;P52756	P98175	823	834	RBM10;RBM5	RNA-binding protein 10;RNA-binding protein 5	yes	no	3	0.047559	25.718	By matching	By MS/MS	By matching	By matching	By matching
ELAEDDSILK	AEEKKKQDELKRIARELAEDDSILK_____	KRIARELAEDDSILK_______________	R	E	L	L	K	-	1	0	0	2	0	0	2	0	0	1	2	1	0	0	0	1	0	0	0	0	0	0	10	0	1131.57	P56385	P56385	60	69	ATP5I	ATP synthase subunit e, mitochondrial	yes	yes	2	3.8802e-05	118.5	By MS/MS	By MS/MS	By MS/MS	By MS/MS
ELAEDGYSGVEVR	ADGIFKAELNEFLTRELAEDGYSGVEVRVT	TRELAEDGYSGVEVRVTPTRTEIIILATRT	R	E	L	V	R	V	1	1	0	1	0	0	3	2	0	0	1	0	0	0	0	1	0	0	1	2	0	0	13	0	1422.66	P23396	P23396	28	40	RPS3	40S ribosomal protein S3	yes	yes	2	4.3016e-05	83.397		By MS/MS		By MS/MS
ELAPAVSVLQLFCSSPK	EAASAIVNLPGCSAKELAPAVSVLQLFCSS	APAVSVLQLFCSSPKAALRYAAVRTLNKVA	K	E	L	P	K	A	2	0	0	0	1	1	1	0	0	0	3	1	0	1	2	3	0	0	0	2	0	0	17	0	1844.97	Q9Y678	Q9Y678	284	300	COPG1	Coatomer subunit gamma-1	no	no	2	2.44e-07	78.763				By MS/MS
ELAQQVQQVADDYGK	ERGDGPICLVLAPTRELAQQVQQVADDYGK	ELAQQVQQVADDYGKCSRLKSTCIYGGAPK	R	E	L	G	K	C	2	0	0	2	0	4	1	1	0	0	1	1	0	0	0	0	0	0	1	2	0	0	15	0	1690.82	Q92841	Q92841	255	269	DDX17	Probable ATP-dependent RNA helicase DDX17	yes	yes	2	1.1724e-15	101.95		By MS/MS
ELCGTPGYLAPEILK	DFGFSCHLEPGEKLRELCGTPGYLAPEILK	ELCGTPGYLAPEILKCSMDETHPGYGKEVD	R	E	L	L	K	C	1	0	0	0	1	0	2	2	0	1	3	1	0	0	2	0	1	0	1	0	0	0	15	0	1659.85	P15735	P15735	186	200	PHKG2	Phosphorylase b kinase gamma catalytic chain, liver/testis isoform	yes	yes	2	6.8653e-18	116.74	By MS/MS	By matching	By MS/MS	By MS/MS	By matching
ELEGLQQLLQNVK	SLKQQLDLTEQQGRKELEGLQQLLQNVKSE	RKELEGLQQLLQNVKSELEMAQEDLSMTQK	K	E	L	V	K	S	0	0	1	0	0	3	2	1	0	0	4	1	0	0	0	0	0	0	0	1	0	0	13	0	1510.84	Q08378	Q08378	1317	1329	GOLGA3	Golgin subfamily A member 3	yes	yes	2	7.333e-25	156.94			By MS/MS	By matching
ELGIWEPLAVK	TWGVNGETGTLVDMKELGIWEPLAVKLQTY	VDMKELGIWEPLAVKLQTYKTAVETAVLLL	K	E	L	V	K	L	1	0	0	0	0	0	2	1	0	1	2	1	0	0	1	0	0	1	0	1	0	0	11	0	1253.7	P49368	P49368	492	502	CCT3	T-complex protein 1 subunit gamma	yes	yes	2	0.0022422	78.934			By matching		By matching
ELHATTPLKNPNR	VAPTHGSILIECAKRELHATTPLKNPNRNH	KRELHATTPLKNPNRNHPTRISLVFYQHKS	R	E	L	N	R	N	1	1	2	0	0	0	1	0	1	0	2	1	0	0	2	0	2	0	0	0	0	0	13	1	1489.8	Q6N021	Q6N021	1879	1891	TET2	Methylcytosine dioxygenase TET2	yes	yes	3	9.9709e-26	162.49	By MS/MS	By MS/MS	By MS/MS
ELIEIISGAAALD	LTLTFNRTRQAVITKELIEIISGAAALD__	TKELIEIISGAAALD_______________	K	E	L	L	D	-	3	0	0	1	0	0	2	1	0	3	2	0	0	0	0	1	0	0	0	0	0	0	13	0	1313.71	P36542	P36542	286	298	ATP5C1	ATP synthase subunit gamma, mitochondrial	yes	yes	2	0.027219	57.59	By matching	By matching	By matching	By matching
ELIIGDR	IKAVDSLVPIGRGQRELIIGDRQTGKTSIA	VPIGRGQRELIIGDRQTGKTSIAIDTIINQ	R	E	L	D	R	Q	0	1	0	1	0	0	1	1	0	2	1	0	0	0	0	0	0	0	0	0	0	0	7	0	814.455	P25705	P25705	208	214	ATP5A1	ATP synthase subunit alpha, mitochondrial	yes	yes	2	0.011408	114.02		By MS/MS
ELISNASDALDK	LIINTFYSNKEIFLRELISNASDALDKIRY	FLRELISNASDALDKIRYESLTDPSKLDSG	R	E	L	D	K	I	2	0	1	2	0	0	1	0	0	1	2	1	0	0	0	2	0	0	0	0	0	0	12	0	1274.64	P08238;P14625	P08238	42	53	HSP90AB1;HSP90B1	Heat shock protein HSP 90-beta;Endoplasmin	yes	no	2	1.354e-05	86.624			By MS/MS	By MS/MS	By MS/MS
ELQHAALGGTATR	EELNRKAEELDRRERELQHAALGGTATRQN	ERELQHAALGGTATRQNNWPPLPSFCPVQP	R	E	L	T	R	Q	3	1	0	0	0	1	1	2	1	0	2	0	0	0	0	0	2	0	0	0	0	0	13	0	1323.69	O14828	O14828	119	131	SCAMP3	Secretory carrier-associated membrane protein 3	yes	yes	3	0.03695	36.292			By MS/MS
ELQSQIQEAR	GYRVATFHDCEDAARELQSQIQEARADLAR	EDAARELQSQIQEARADLARRGLRF_____	R	E	L	A	R	A	1	1	0	0	0	3	2	0	0	1	1	0	0	0	0	1	0	0	0	0	0	0	10	0	1200.61	Q9P2X0	Q9P2X0	73	82	DPM3	Dolichol-phosphate mannosyltransferase subunit 3	yes	yes	2	2.2376e-09	149.94		By MS/MS			By MS/MS
ELSDIAHR	______________________________	LTPEQKKELSDIAHRIVAPGKGILAADEST	K	E	L	H	R	I	1	1	0	1	0	0	1	0	1	1	1	0	0	0	0	1	0	0	0	0	0	0	8	0	939.477	P04075	P04075	15	22	ALDOA	Fructose-bisphosphate aldolase A	yes	yes	2;3	0.0198	91.9	By matching	By MS/MS	By matching	By matching	By matching
ELSQGLLPLPQPYQAQGVLASQALSQGSEPSSENANDTIILR	LGTRLDQQTLPLGGRELSQGLLPLPQPYQA	SEPSSENANDTIILRNLNPHSTMDSILGAL	R	E	L	L	R	N	4	1	2	1	0	6	3	3	0	2	7	0	0	0	4	6	1	0	1	1	0	0	42	0	4419.26	P98175	P98175	264	305	RBM10	RNA-binding protein 10	yes	yes	4	2.1966e-16	64.72	By MS/MS	By matching	By MS/MS	By MS/MS
ELTTEIDNNIEQISSYK	QNRKDAEAWFNEKSKELTTEIDNNIEQISS	TTEIDNNIEQISSYKSEITELRRNVQALEI	K	E	L	Y	K	S	0	0	2	1	0	1	3	0	0	3	1	1	0	0	0	2	2	0	1	0	0	0	17	0	1995.96	P13645;CON__P13645	P13645	346	362	KRT10	Keratin, type I cytoskeletal 10	yes	no	2	0	329.49			By matching	By MS/MS	By MS/MS
ELYDRYGEQGLR	EISFAYEVLSNPEKRELYDRYGEQGLREGS	EKRELYDRYGEQGLREGSGGGGGMDDIFSH	R	E	L	L	R	E	0	2	0	1	0	1	2	2	0	0	2	0	0	0	0	0	0	0	2	0	0	0	12	1	1497.72	O60884	O60884	64	75	DNAJA2	DnaJ homolog subfamily A member 2	yes	yes	3	0.00099903	83.617		By MS/MS
EMNPALGIDCLHK	NPIQTMTEVRARQVKEMNPALGIDCLHKGT	VKEMNPALGIDCLHKGTNDMKQQHVIETLI	K	E	M	H	K	G	1	0	1	1	1	0	1	1	1	1	2	1	1	0	1	0	0	0	0	0	0	0	13	0	1496.71	P48643	P48643	484	496	CCT5	T-complex protein 1 subunit epsilon	yes	yes	3	0.025354	41.621	By matching
EMTPGEIK	GLSVEGFVLPSSTTREMTPGEIKFSVHVES	LPSSTTREMTPGEIKFSVHVESVLNRVPQP	R	E	M	I	K	F	0	0	0	0	0	0	2	1	0	1	0	1	1	0	1	0	1	0	0	0	0	0	8	0	903.437	P46020	P46020	1099	1106	PHKA1	Phosphorylase b kinase regulatory subunit alpha, skeletal muscle isoform	yes	yes	2	0.038315	81.191		By MS/MS
ENAGEDPGLAR	PGSGNPCHEASAAQKENAGEDPGLARQAPK	AAQKENAGEDPGLARQAPKPRKQRSSLLEK	K	E	N	A	R	Q	2	1	1	1	0	0	2	2	0	0	1	0	0	0	1	0	0	0	0	0	0	0	11	0	1127.52	P81605	P81605	43	53	DCD	Dermcidin;Survival-promoting peptide;DCD-1	yes	yes	2	0.00015734	100.02	By MS/MS	By matching	By MS/MS		By matching
ENALLELSK	KIYQWINELSSPETRENALLELSKKRESVP	SSPETRENALLELSKKRESVPDLAPMLWHS	R	E	N	S	K	K	1	0	1	0	0	0	2	0	0	0	3	1	0	0	0	1	0	0	0	0	0	0	9	0	1015.55	Q92600	Q92600	36	44	RQCD1	Cell differentiation protein RCD1 homolog	yes	yes	2	0.023418	71.614	By matching	By MS/MS	By matching	By matching
ENAPAIIFIDEIDAIATK	GEGPRMVRDVFRLAKENAPAIIFIDEIDAI	PAIIFIDEIDAIATKRFDAQTGADREVQRI	K	E	N	T	K	R	4	0	1	2	0	0	2	0	0	5	0	1	0	1	1	0	1	0	0	0	0	0	18	0	1943.03	P43686	P43686	256	273	PSMC4	26S protease regulatory subunit 6B	yes	yes	2	7.6123e-23	125.22	By MS/MS	By MS/MS	By matching	By matching
ENFPNFLSACDK	RDDKIEKPSLLTMMKENFPNFLSACDKKGT	MMKENFPNFLSACDKKGTNYLADVFEKKDK	K	E	N	D	K	K	1	0	2	1	1	0	1	0	0	0	1	1	0	2	1	1	0	0	0	0	0	0	12	0	1440.63	P31151;Q86SG5	P31151	38	49	S100A7;S100A7A	Protein S100-A7;Protein S100-A7A	yes	no	2	0.017961	61.353		By matching	By matching		By MS/MS
ENFPNFLSACDKK	RDDKIEKPSLLTMMKENFPNFLSACDKKGT	MKENFPNFLSACDKKGTNYLADVFEKKDKN	K	E	N	K	K	G	1	0	2	1	1	0	1	0	0	0	1	2	0	2	1	1	0	0	0	0	0	0	13	1	1568.73	P31151;Q86SG5	P31151	38	50	S100A7;S100A7A	Protein S100-A7;Protein S100-A7A	yes	no	3	0.00025071	79.875	By MS/MS	By MS/MS	By MS/MS	By MS/MS	By MS/MS
ENVNLAQIR	DLIFAFDEIVALGYRENVNLAQIRTFTEMD	VALGYRENVNLAQIRTFTEMDSHEEKVFRA	R	E	N	I	R	T	1	1	2	0	0	1	1	0	0	1	1	0	0	0	0	0	0	0	0	1	0	0	9	0	1055.57	P48444	P48444	123	131	ARCN1	Coatomer subunit delta	yes	yes	2	0.0047675	98.299	By MS/MS		By MS/MS	By matching
EPENHAETLPEK	LEPSTEPLLTTVEEREPENHAETLPEKPRE	EEREPENHAETLPEKPREARAPLKSWSQED	R	E	P	E	K	P	1	0	1	0	0	0	4	0	1	0	1	1	0	0	2	0	1	0	0	0	0	0	12	0	1392.65	Q96LK8	Q96LK8	288	299	SPATA32	Spermatogenesis-associated protein 32	yes	yes	2;3	0.0052933	65.224
EQAEEERYFR	GAGSIREAGGAFGKREQAEEERYFRAQSRE	AFGKREQAEEERYFRAQSREQLAALKKHHE	R	E	Q	F	R	A	1	2	0	0	0	1	4	0	0	0	0	0	0	1	0	0	0	0	1	0	0	0	10	1	1355.61	Q9UII2	Q9UII2	51	60	ATPIF1	ATPase inhibitor, mitochondrial	yes	yes	3	5.2798e-07	138.66		By MS/MS
EQCEQLEK	EEEEEELVDPLTTVREQCEQLEKCVKARER	DPLTTVREQCEQLEKCVKARERLELCDERV	R	E	Q	E	K	C	0	0	0	0	1	2	3	0	0	0	1	1	0	0	0	0	0	0	0	0	0	0	8	0	1062.47	P07919;A0A096LP55	P07919	35	42	UQCRH;UQCRHL	Cytochrome b-c1 complex subunit 6, mitochondrial;Cytochrome b-c1 complex subunit 6	yes	no	2	0.0019627	145.63	By matching	By MS/MS	By MS/MS	By matching	By matching
EQGVLSFWR	KQYKGIIDCVVRIPKEQGVLSFWRGNLANV	VVRIPKEQGVLSFWRGNLANVIRYFPTQAL	K	E	Q	W	R	G	0	1	0	0	0	1	1	1	0	0	1	0	0	1	0	1	0	1	0	1	0	0	9	0	1120.57	P05141;P12236	P05141	64	72	SLC25A5;SLC25A6	ADP/ATP translocase 2;ADP/ATP translocase 2, N-terminally processed;ADP/ATP translocase 3;ADP/ATP translocase 3, N-terminally processed	no	no	2	2.0796e-08	160.63	By MS/MS	By MS/MS	By MS/MS	By MS/MS	By MS/MS
EQIKTLNNK	VKVDPEIQNVKAQEREQIKTLNNKFASFID	VKAQEREQIKTLNNKFASFIDKVRFLEQQN	R	E	Q	N	K	F	0	0	2	0	0	1	1	0	0	1	1	2	0	0	0	0	1	0	0	0	0	0	9	1	1086.6	CON__P13647;P13647;CON__P02538;P02538;CON__Q8VED5;CON__H-INV:HIT000292931;CON__P04259;CON__P48668;P48668;P04259;CON__P35908v2;P35908;CON__P35908;CON__P07744	CON__P35908v2	180	188	KRT5;KRT6A;KRT6C;KRT6B;KRT2	Keratin, type II cytoskeletal 5;Keratin, type II cytoskeletal 6A;Keratin, type II cytoskeletal 6C;Keratin, type II cytoskeletal 6B;Keratin, type II cytoskeletal 2 epidermal	no	no	3	0.034947	55.112		By matching
EQLAALKK	REQAEEERYFRAQSREQLAALKKHHEEEIV	YFRAQSREQLAALKKHHEEEIVHHKKEIER	R	E	Q	K	K	H	2	0	0	0	0	1	1	0	0	0	2	2	0	0	0	0	0	0	0	0	0	0	8	1	899.544	Q9UII2	Q9UII2	65	72	ATPIF1	ATPase inhibitor, mitochondrial	yes	yes	2	0.017449	58.981	By matching	By matching	By matching	By MS/MS	By matching
[truncated: 2,002 more rows]
[truncated: 66 more columns]
