# Supplementary figures and images for: Bacterial OTU deubiquitinases regulate substrate ubiquitination upon Legionella infection
Source: eLife journal article supplement (doi:10.7554/elife.58277), 2020-11-13

Figure 2-figure supplement 1

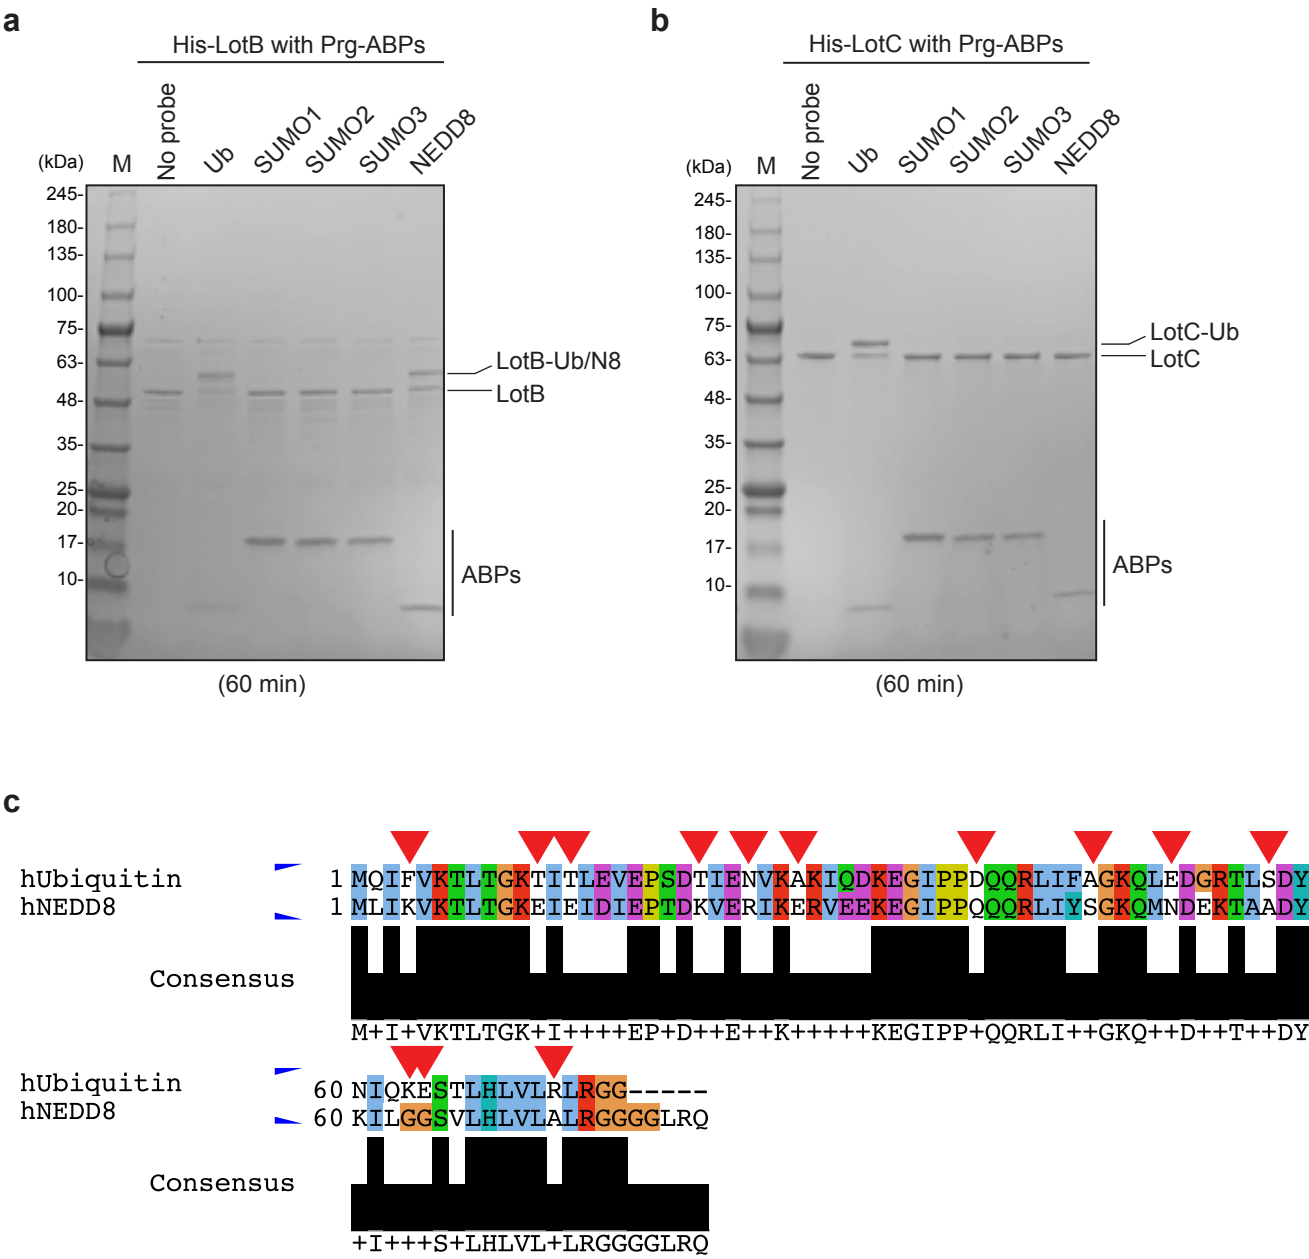

Supplement: supp [file elife-58277-supp-v1.zip]

# Figure1-figure supplement 1

**a**

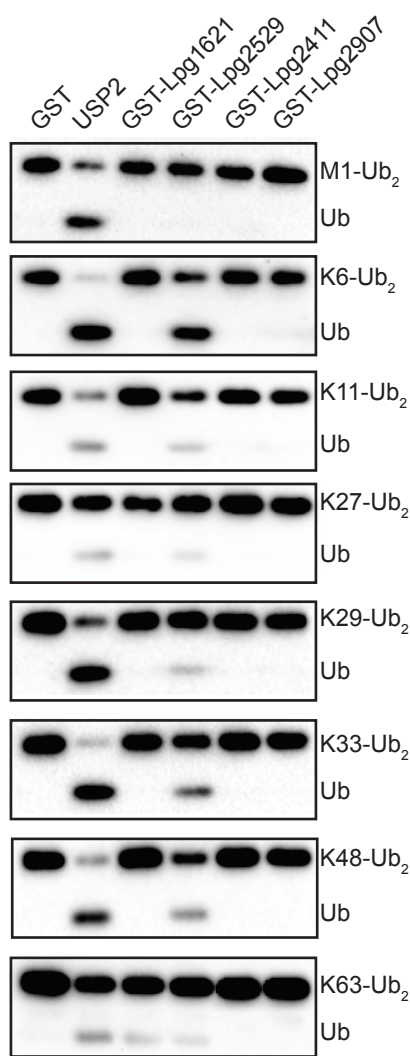

**b**

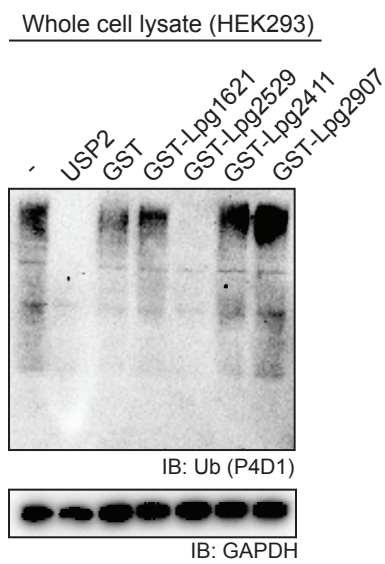

Supplement: supp [file elife-58277-supp-v1.zip]

Figure5-figure supplement 2

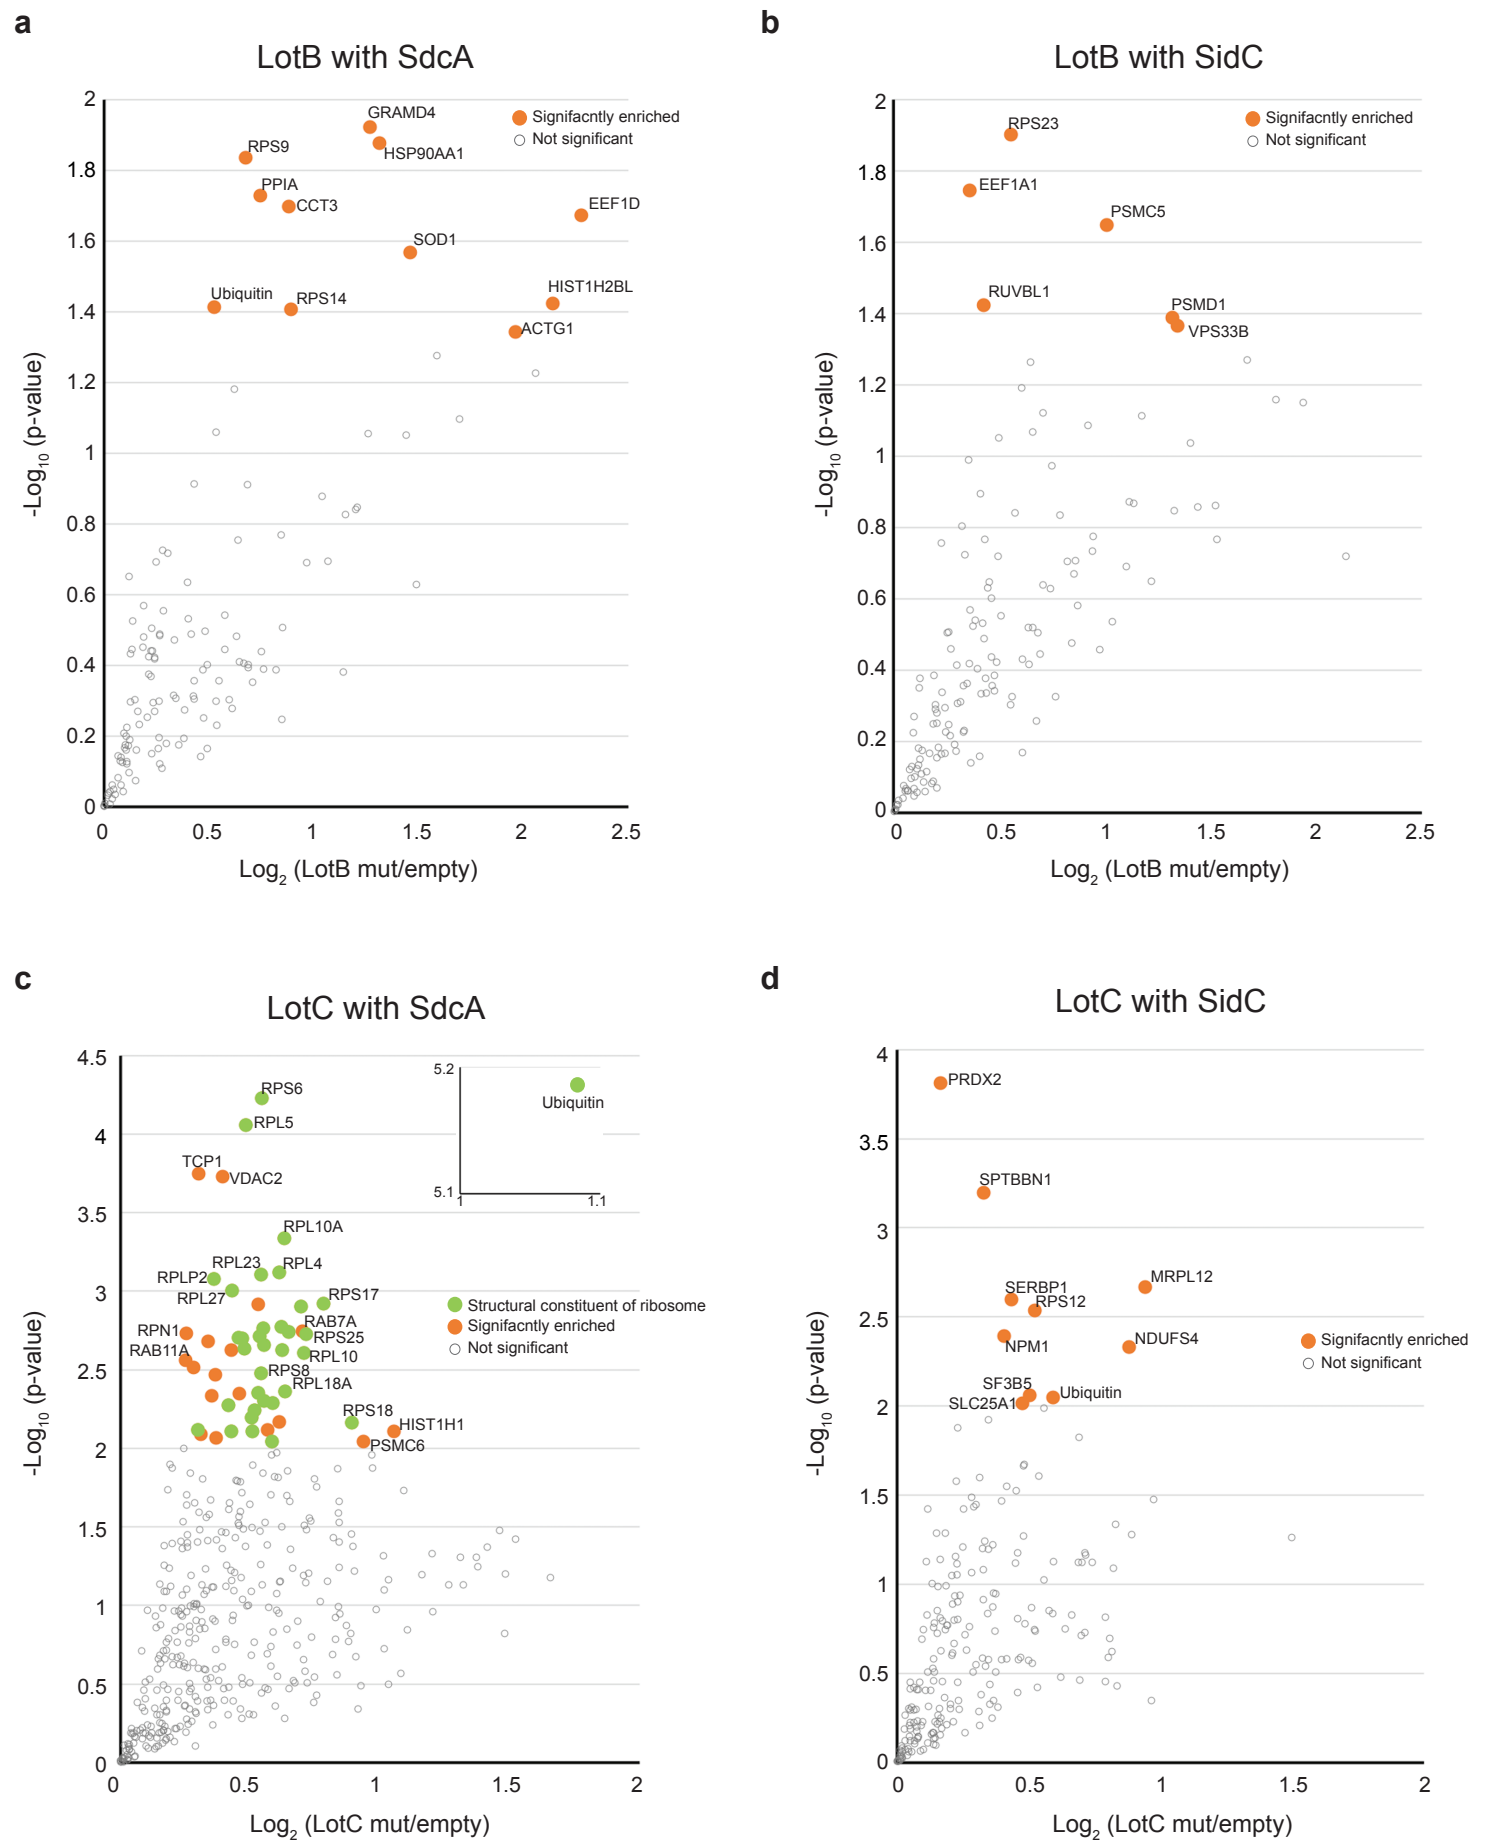

Supplement: supp [file elife-58277-supp-v1.zip]

Figure 3-figure supplement 1

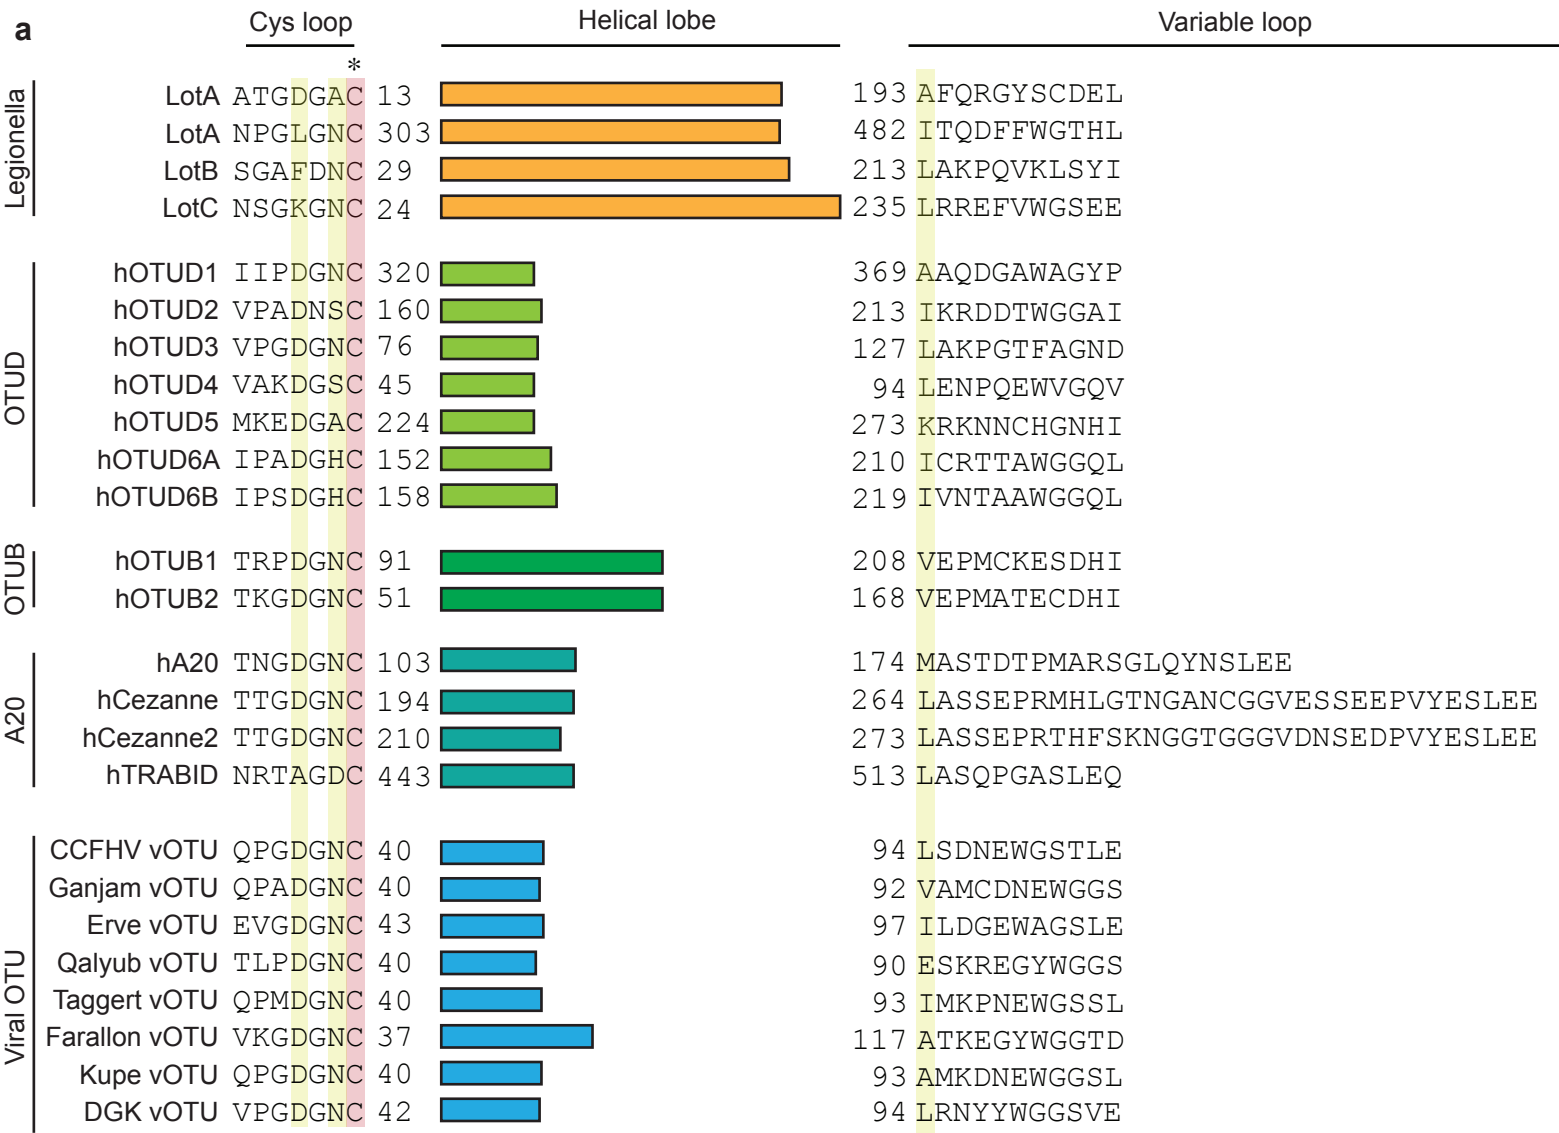

Supplement: supp [file elife-58277-supp-v1.zip]

Figure5-figure supplement 1

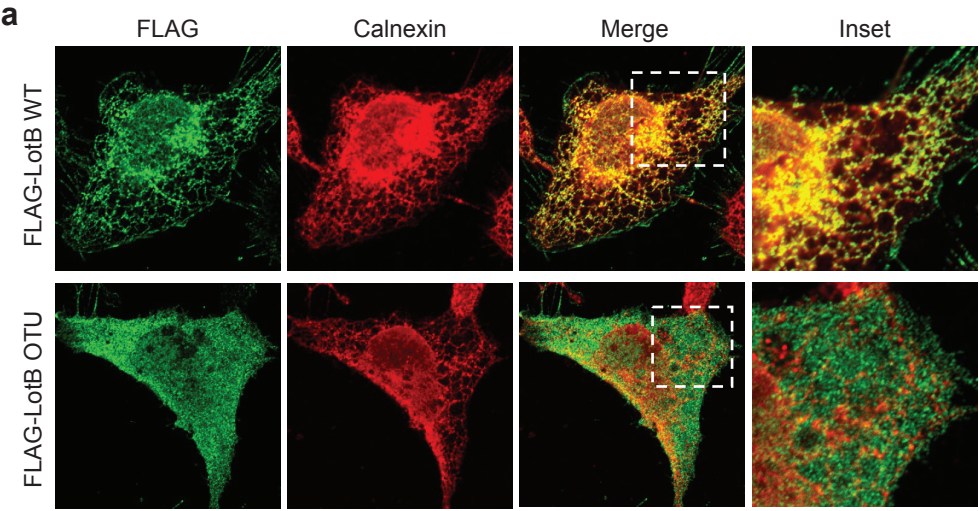

Supplement: supp [file elife-58277-supp-v1.zip]
